# Supplementary material for: Rasal1: A candidate exercise mimetic to increase adult hippocampal neurogenesis in middle age
Source: Research Square preprint supplement (doi:10.21203/rs.3.rs-8394751/v1), 2026-02-13
Supplement: Supplementary file 1 [file 01a9106c732e8b09065b661b.xlsx]

## Sheet: Info
sheet	study	matrix	modality	dg	cor_sign	method
2	Discovery	Dentate Gyrus	Proteomics	Dorsal	Positive	GOnored_KEGG
3	Discovery	Dentate Gyrus	Proteomics	Dorsal	Negative	GOnored_KEGG
4	Discovery	Dentate Gyrus	Proteomics	Ventral	Positive	GOnored_KEGG

## Sheet: sheet_2
geneSet	description	link	size	overlap	expect	enrichmentRatio	pValue	FDR	overlapId	database	userId
GO:0098793	presynapse	http://amigo.geneontology.org/amigo/term/GO:0098793	489	85	21.1889	4.01153	0	0	24213;24215;24380;24408;24586;24668;24681;24923;25045;25252;25479;25529;25558;25639;25673;25751;26989;29340;29382;29411;29482;29495;29521;29598;29627;29647;54241;56003;59267;64060;64303;64516;64829;65033;65178;66031;79434;81022;81672;81743;83532;83633;83764;84008;84009;84390;85238;89816;94197;114114;114766;116563;116638;116654;117028;117103;117258;117277;117282;117556;140667;140673;140908;171297;…	geneontology_Cellular_Component_noRedundant	Dmxl2;Rab5c;Dnm1l;Ppt1;Atp2b1;Stxbp5;Bin1;Ppp1ca;Flot2;Cttnbp2;Rab5b;Nlgn3;Vps35;Picalm;Cask;Dbi;Ctbp1;Prkce;Pde2a;Sept3;Fkbp1a;Snap91;Ncam1;Sept4;Wdr7;Stxbp1;Pfn1;Cadps;Prkcg;Grin1;Atp2b2;Rab11b;Cops4;Anxa5;Vps45;Ap3m2;Grm7;Rab8a;Cltc;Tprg1l;Synj1;Cyfip1;Epn1;Ap2m1;Unc13a;Sec22b;Syt7;Stx12;Exoc3;Pip5k1c;Arhgap44;Gpm6a;Sv2b;Hnrnpk;Dnajc6;Atp6v0d1;Napa;Gad2;Slc6a17;Ptprs;Cntn1;Gria2;Kif1a;Slc1a2;K…
GO:0033267	axon part	http://amigo.geneontology.org/amigo/term/GO:0033267	389	70	16.8558	4.15287	0	0	24213;24408;24586;24681;24766;24832;25252;25558;25595;25613;25639;25673;25751;29213;29409;29423;29495;29521;29545;29627;29738;29753;50646;54241;58948;59267;64053;64160;64829;65178;81653;81672;83572;83825;84008;84390;85238;114559;116563;116654;116724;117028;117277;117282;117550;117556;140667;140673;140908;170714;171114;192213;192361;252881;291969;299799;301252;306439;308666;308777;309207;314633;36…	geneontology_Cellular_Component_noRedundant	Dlg2;Ndrg2;Bin1;Epb41l3;Dlg3;Fkbp1a;Snap91;Ncam1;Stxbp1;Dclk1;Ap3b2;Basp1;Prkcg;Grin1;Uchl1;Gap43;Ranbp1;Ywhae;Anxa5;Ptk2b;Twf2;Ap3m2;Grm7;Rufy3;Dynlrb1;Hsp90ab1;Cltc;Tprg1l;Dbn1;Synj1;Cyfip1;Epn1;Ap2m1;Unc13a;Sirt2;Syt7;Exoc3;Gpm6a;Sv2b;Kcnab2;Mag;Hnrnpk;Arhgef7;Ppp1r2;Atp6v0d1;Napa;Gria2;Kif1a;Ap3d1;Scn2a;Atp1a3;Fscn1;Kif5b;Dlg1;Scamp1;Map2;Dlg4;Ptprz1;Hcn1;Exoc4;Cdk5;Rab21;Dnm2;Cntnap1;Thy1;Us…
GO:0098978	glutamatergic synapse	http://amigo.geneontology.org/amigo/term/GO:0098978	368	69	15.9459	4.32714	0	0	24215;24408;24418;24586;24668;25150;25252;25479;25529;25558;25613;25725;25751;26989;29177;29236;29340;29382;29495;29546;29598;29627;29753;50646;56718;58948;59267;64053;64303;64310;65040;65180;79433;81653;81672;81732;83633;83764;83765;84009;114705;114766;116563;116643;117028;117103;117281;117282;140670;140673;140729;140908;170851;171114;171297;266777;282587;291245;303222;303599;305227;306439;31063…	geneontology_Cellular_Component_noRedundant	Dlg2;Ndrg2;Atp2b1;Bin1;Ppp2r1a;Ppp1ca;Flot2;Cttnbp2;Nlgn3;Vps35;Actn2;Rtn4;Dlgap1;Dlg3;Ctbp1;Prkce;Actr3;Ncam1;Stxbp1;Pfn1;Hnrnpa2b1;Cadps;Homer1;Grin1;Myh10;Atp2b2;Sept11;Ywhae;Prkar1a;Ptk2b;Grm7;Rab8a;Fyn;Dbn1;Ap2m1;Sirt2;Syt7;Kcnd2;Arhgap44;Gpm6a;Hnrnpk;Map2k1;Rgs14;Rpsa;Hpca;Napa;Slc6a17;Ptprs;Gria2;Arf1;Nptx1;Kalrn;Ap3d1;Cacng8;Dlg1;Dlg4;Ptprz1;Tanc2;Anks1b;Grm5;Ap2b1;Caprin1;Phb2;Cdk5;Dnm2;…
GO:0099568	cytoplasmic region	http://amigo.geneontology.org/amigo/term/GO:0099568	338	56	14.6459	3.82359	0	0	24192;24366;25037;25595;25686;25725;29167;29177;29213;29495;29545;29627;50646;54319;56003;60627;63836;64159;64185;64465;64829;81634;81653;83572;83764;83788;114559;114764;116590;116653;116654;117282;117515;117550;140667;170714;170851;171455;252881;282587;287606;289820;291245;294568;296654;299799;300666;305227;308777;309557;314633;360739;360950;362361;362375;363288	geneontology_Cellular_Component_noRedundant	Flot2;Cttnbp2;Actn2;Actr2;Dctn1;Sept3;Sptan1;Exoc2;Sept4;Hnrnpa2b1;Ap3b2;Uchl1;Sept11;Ranbp1;Actn1;Prkar1a;Ptk2b;Ap3m2;Lancl2;Dynlrb1;Dbn1;Unc13a;Mapre1;Wdr1;Exoc3;Gsn;Gnai1;Hnrnpk;Arhgef7;Map2k1;Hpca;Epb41l2;Actn4;C2cd2l;Cap2;Gria2;Kif1a;Ap3d1;Cdc42;Kif5b;Exoc5;Sept9;Akr1b1;Mapk1;Map2;Wasf1;Dlg4;Sept2;Ezr;Exoc4;Mobp;Fgb;Rab21;Cap1;Pafah1b1;Tubb4a
GO:0099572	postsynaptic specialization	http://amigo.geneontology.org/amigo/term/GO:0099572	327	57	14.1693	4.02278	0	0	24215;24408;24418;24681;24686;25150;25230;25252;25479;25529;25613;25751;29149;29423;29495;29546;29627;29647;50646;56029;58948;64053;64310;65040;65178;65180;81653;81729;83765;84009;89816;114117;114705;114766;116590;116653;116654;117103;117282;140729;140908;140931;170851;171297;246755;289820;291245;303222;303599;305227;308650;310635;313409;314721;360840;362152;404781	geneontology_Cellular_Component_noRedundant	Dlg2;Add3;Nlgn3;Vps35;Actn2;Rtn4;Dlgap1;Picalm;Cask;Dlg3;Actr2;Snap91;Prkcg;Homer1;Grin1;Gap43;Atp2b2;Sept11;Ptk2b;Rab8a;Fyn;Dbn1;Hnrnph1;Hnrnpa3;Hnrnph2;Prnp;Kcnd2;Arhgap44;Iqsec3;Hnrnpk;Map2k1;Dnajc6;Rgs14;Strn;Srgap2;Ptprs;Cap2;Gria2;Arf1;Kalrn;Cacng8;Dlg1;Mapk1;Gng3;Dlg4;Ptprz1;Tanc2;Srcin1;Anks1b;Exoc4;Grm5;Bcas1;Phb2;Cdk5;Dnm2;Rpl10a;Arhgef2
GO:0098984	neuron to neuron synapse	http://amigo.geneontology.org/amigo/term/GO:0098984	322	59	13.9526	4.22859	0	0	24215;24408;24418;24681;24686;25150;25230;25252;25479;25529;25567;25613;25751;29149;29423;29495;29546;29627;29647;50646;56029;58948;59267;64053;64310;65040;65178;65180;81653;81672;81729;83765;84009;89816;114117;114705;114766;116590;116653;116654;117103;117282;140729;140908;140931;170851;246755;289820;291245;303222;303599;305227;308650;310635;313409;314721;360840;362152;404781	geneontology_Cellular_Component_noRedundant	Dlg2;Add3;Vps35;Actn2;Rtn4;Dlgap1;Picalm;Cask;Dlg3;Actr2;Snap91;Prkcg;Homer1;Grin1;Gap43;Atp2b2;Sept11;Ptk2b;Tnr;Grm7;Rab8a;Fyn;Dbn1;Hnrnph1;Hnrnpa3;Hnrnph2;Syt7;Prnp;Kcnd2;Arhgap44;Iqsec3;Hnrnpk;Map2k1;Dnajc6;Rgs14;Strn;Srgap2;Ptprs;Cap2;Gria2;Arf1;Kalrn;Cacng8;Dlg1;Mapk1;Gng3;Dlg4;Ptprz1;Tanc2;Srcin1;Anks1b;Exoc4;Grm5;Bcas1;Phb2;Cdk5;Dnm2;Rpl10a;Arhgef2
GO:0043209	myelin sheath	http://amigo.geneontology.org/amigo/term/GO:0043209	125	37	5.4164	6.83111	0	0	24192;24213;24264;24400;24642;24832;25037;25183;25275;25558;25721;29213;29409;29545;50664;54319;81654;83765;83782;84008;116643;116654;117258;140673;157074;191575;192277;292804;293481;294864;295923;296654;298942;299809;360950;361532;685232	geneontology_Cellular_Component_noRedundant	Rtn4;Cct2;Stxbp1;Uchl1;Atp6v1a;Gnb1;Pgam1;Stip1;Dld;Cct5;Sirt2;Wdr1;Sdha;Nme1;Gsn;Mag;Napa;Tufm;Cntn1;Nme2;Atp1a3;Ckb;Akr1b1;Gnao1;Dlat;Cnp;Ezr;Exoc4;Mobp;Got2;Gdi1;Vcp;Cntnap1;Thy1;Ndufs3;Gpi;Tubb4a
GO:0097060	synaptic membrane	http://amigo.geneontology.org/amigo/term/GO:0097060	396	58	17.1591	3.38012	2.22045e-16	2.52122e-14	24213;24215;24380;24408;24418;24586;24681;24923;25252;25529;25558;25613;25669;25751;29149;29482;29495;29546;29598;29627;29647;29715;56003;56029;58948;59267;64053;64310;64829;65040;65178;65180;81022;81653;81672;81743;83633;83764;83765;84008;85238;89816;114114;114705;117258;117277;140729;140908;171297;252881;287061;291245;306439;309207;314641;314721;360840;404781	geneontology_Cellular_Component_noRedundant	Dlg2;Dnm1l;Atp2b1;Stxbp5;Flot2;Nlgn3;Actn2;Rtn4;Dlgap1;Picalm;Cask;Dlg3;Pde2a;Sept3;Snap91;Ncam1;Stxbp1;Prkcg;Homer1;Grin1;Atp2b2;Grm7;Dbn1;Synj1;Epn1;Unc13a;Syt7;Exoc3;Kcnd2;Pip5k1c;Gpm6a;Iqsec3;Rgs14;Strn;Gad2;Srgap2;Ptprs;Cntn1;Slc8a1;Gria2;Arf1;Slc1a2;Atp1a3;Cacng8;Dlg1;Rogdi;Dlg4;Ptprz1;Srcin1;Anks1b;Grm5;Cdk5;Stx1b;Dnm2;Cntnap1;Cpe;Dagla;Gabbr2
GO:0051186	cofactor metabolic process	http://amigo.geneontology.org/amigo/term/GO:0051186	386	57	16.7258	3.4079	2.22045e-16	2.52122e-14	24192;24248;24423;24426;24439;24440;24642;25014;25045;25062;25150;25274;25288;25604;25630;25721;25741;26759;29328;29338;29411;29738;50671;60416;60666;64392;65152;65248;79239;81530;81654;94167;94173;113976;114096;116643;117243;117287;170587;171053;288912;289950;292804;293829;296849;298942;304542;305177;310378;361472;361596;362440;498909;499422;681913;100359982;108348148	geneontology_Biological_Process_noRedundant	Pfkl;Ppt1;Pcmt1;Coq9;Gpd2;Dbi;Fasn;Prdx2;Park7;Acat1;Pdk2;Pkm;Pfkm;Hmox2;Gpd1;Acsl1;Pgam1;Fyn;Gstp1;Dld;Pank4;Acot7;Acsl4;Idh3B;Kcnab2;Idh2;Acsl6;Coq5;Aldh1l1;Nnt;Pfkp;Gstt3;Mpc2;Enoph1;Gpx4;Hagh;Hbb;Akr1b1;Gstm1;Idh3a;Prdx6;Dlat;Tst;Ndufa9;Mthfd1l;Cs;Got2;Mri1;Pdhb;Gstm3;Vcp;Gstz1;Mcee;Prkaa1;Cat;Pdk3;Gpi
GO:0072521	purine-containing compound metabolic process	http://amigo.geneontology.org/amigo/term/GO:0072521	381	57	16.5092	3.45263	2.22045e-16	2.52122e-14	24642;25014;25045;25282;25288;25604;25630;25741;26759;26956;29177;29223;29562;50671;60416;60666;65152;65248;81530;81654;81743;83782;94194;113976;114114;116643;117243;117272;117287;117533;157074;170587;170851;171053;171116;191575;288912;289217;289950;292804;293829;293991;296488;296849;298942;299739;300047;302950;303179;305177;311422;315150;361472;498909;685232;100359982;100363253	geneontology_Biological_Process_noRedundant	Pfkl;Dnm1l;Pcmt1;Coq9;Dbi;Fasn;Pde2a;Park7;Acat1;Atp6v1a;Prpsap2;Pdk2;Pkm;Pfkm;Gpd1;Acsl1;Opa1;Pgam1;Cyc1;Dld;Nt5c2;Pank4;Acot7;Prps1;Itpa;Sdha;Sdhc;Nme1;Ndufb8;Acsl4;Acsl6;Guk1;Map2k1;Pfkp;Gmpr;Hpca;Ak4;Nme2;Adsl;Mpc2;Enoph1;Adcy9;Dlat;Ola1;Cox6a1;Mthfd1l;Cox5b;Ak3;Cs;Mri1;Pdhb;Ndufa12;Vcp;Mcee;Prkaa1;Pdk3;Gpi
GO:0043254	regulation of protein complex assembly	http://amigo.geneontology.org/amigo/term/GO:0043254	290	49	12.566	3.8994	2.22045e-16	2.52122e-14	24923;25230;25479;25558;25595;29167;29213;29340;29677;50646;56718;58817;64159;64303;64310;64465;65178;65248;79215;81504;81653;81661;81732;81814;81824;81827;114114;114764;116643;117152;117262;117277;140673;192269;287155;289400;289820;289990;294568;295461;296654;297518;308666;310635;314442;497198;683788;684352;100361417	geneontology_Biological_Process_noRedundant	Dnm1l;Arpc1a;Cand1;Add3;Vps35;Impact;Prkce;Actr2;Dctn1;Actr3;Sptan1;Snap91;Stxbp1;Pfn1;Grb2;Mtpn;Tmsb4x;Ptk2b;Twf2;Arpc4;Psmc3;Psmc6;Dbn1;Cyfip1;Epn1;Sec23a;Tbcd;Mapre1;Gsn;Sub1;Gmfb;Napa;Psmc4;Arf1;Fscn1;Cdc42;Stub1;Wars;Map2;Wasf1;Stx1b;Psmc5;Sec24b;Vcp;Prkaa1;Mtor;Camsap2;Arhgef2;Tubb4a
GO:0051493	regulation of cytoskeleton organization	http://amigo.geneontology.org/amigo/term/GO:0051493	361	54	15.6426	3.45212	1.11022e-15	1.15556e-13	25152;25230;25498;25537;25595;25686;29154;29167;29213;29340;29489;50646;54245;56718;60328;64159;64303;64310;64465;65248;79215;81504;81653;81661;81732;81814;81824;83572;83809;85252;114514;114764;116590;286993;287931;289400;289820;291245;294568;296654;297518;298848;303222;306400;308666;310635;316009;360593;360739;360950;502674;683788;684352;100361417	geneontology_Biological_Process_noRedundant	Arpc1a;Ppm1e;Clasp2;Add3;Actn2;Prkce;Actr2;Dctn1;Actr3;Sptan1;Pfn1;Dync1h1;Ranbp1;Mark2;Grb2;Mtpn;Tmsb4x;Ptk2b;Plxnb1;Twf2;Arpc4;Xpo1;Dstn;Dbn1;Cyfip1;Tbcd;Capn2;Mapre1;Wdr1;Taok1;Gsn;Arhgap44;Gnai1;Rock2;Gmfb;Map1a;Arf1;Arhgap35;Fscn1;Crk;Cdc42;Mapk1;Ppm1f;Map2;Wasf1;Mapre3;Nsfl1c;Npm1;Prkaa1;Mtor;Camsap2;Pafah1b1;Arhgef2;Tubb4a
rno01200	Carbon metabolism	http://www.kegg.jp/kegg-bin/show_pathway?rno01200+114096+140547+157074+170587+170670+24248+24368+24399+24552+24642+25014+25104+25179+25630+25721+25741+289217+289950+290401+292804+293829+29562+298942+315722+360975+361596+361602+60416+65152+81654+94173	127	31	5.50306	5.63323	1.9984e-15	1.92e-13	114096;140547;157074;170587;170670;24248;24368;24399;24552;24642;25014;25104;25179;25630;25721;25741;289217;289950;290401;292804;293829;29562;298942;315722;360975;361596;361602;60416;65152;81654;94173	pathway_KEGG	Pfkl;Acat1;Pkm;Fh;Pfkm;Pgam1;Me3;Dld;Prps1;Ogdh;Me1;Pc;Sdha;Hadha;Sdhc;Idh3B;Idh2;Glud1;Pfkp;Adpgk;Idh3g;Esd;Echs1;Idh3a;Dlat;Cs;Got2;Pdhb;Mcee;Cat;Gpi
GO:0006753	nucleoside phosphate metabolic process	http://amigo.geneontology.org/amigo/term/GO:0006753	455	61	19.7157	3.09398	2.66454e-15	2.37715e-13	24642;25014;25045;25062;25275;25282;25288;25630;25741;26759;26956;29177;29223;29562;29738;50671;60416;60666;65152;65248;81530;81654;81743;83782;94173;94194;113976;114096;114114;116590;116643;117243;117272;117287;117533;157074;170587;170851;171053;171116;191575;289217;289950;292804;293829;293991;296488;296849;298942;299739;300047;302950;303179;310378;311422;315150;361596;498909;685232;100359982;10…	geneontology_Biological_Process_noRedundant	Pfkl;Dnm1l;Coq9;Gpd2;Dbi;Fasn;Pde2a;Park7;Acat1;Atp6v1a;Prpsap2;Pdk2;Pkm;Pfkm;Gpd1;Acsl1;Opa1;Pgam1;Cyc1;Dld;Nt5c2;Pank4;Acot7;Prps1;Itpa;Sdha;Sdhc;Nme1;Ndufb8;Acsl4;Idh3B;Kcnab2;Idh2;Acsl6;Guk1;Nnt;Map2k1;Pfkp;Gmpr;Hpca;Ak4;Nme2;Adsl;Mpc2;Adcy9;Idh3a;Mapk1;Dlat;Cnp;Ola1;Cox6a1;Cox5b;Ak3;Cs;Pdhb;Ndufa12;Vcp;Mcee;Prkaa1;Pdk3;Gpi
GO:0030133	transport vesicle	http://amigo.geneontology.org/amigo/term/GO:0030133	300	48	12.9993	3.69249	3.10862e-15	2.58845e-13	24380;24923;25045;25529;25669;25673;29411;29495;29521;29627;54241;56042;58817;59267;64060;64516;64829;65033;65178;66031;79434;81022;83532;84599;89816;93646;94197;114114;116638;116654;117028;117103;117556;266777;282587;287061;287606;287709;288700;288779;291969;295461;310710;315676;360915;363288;613226;687090	geneontology_Cellular_Component_noRedundant	Dmxl2;Rab5c;Dnm1l;Ppt1;Stxbp5;Bin1;Cttnbp2;Rab5b;Picalm;Dbi;Snap91;Sept4;Wdr7;Uso1;Rab11b;Cops4;Anxa5;Vps45;Rab8a;Cltc;Tprg1l;Unc13a;Sec23a;Sec22b;Sec31a;Syt7;Stx12;Sv2b;Atp6v0d1;Gad2;Slc6a17;Ptprs;Gria2;Kif1a;Nptx1;Scamp1;Rogdi;Dlg4;Exoc4;Slc17a7;Rab14;Stx1b;Sec24b;Cpe;Vps33b;Vdac3;Rab35;Tmed10
GO:0032990	cell part morphogenesis	http://amigo.geneontology.org/amigo/term/GO:0032990	428	58	18.5457	3.1274	7.99361e-15	6.24001e-13	24392;24832;25150;25152;25183;25275;25529;25558;25595;25613;25728;25751;29409;29423;29495;29545;29647;56029;60328;64465;65178;65208;79559;81653;81732;83572;83765;84008;84009;89816;114114;116645;117103;117282;140908;170851;171116;171297;266777;289820;290640;294568;299799;301252;303222;306400;306439;308666;310533;316009;360840;360921;361092;362173;362750;363445;497198;684352	geneontology_Biological_Process_noRedundant	Dnm1l;Nlgn3;Rtn4;Picalm;Impact;Cask;Actr2;Dpysl5;Actr3;Snap91;Atl1;Stxbp1;Uchl1;Gap43;Mark2;Plxnb1;Twf2;Opa1;Alcam;Rab8a;Fyn;Rufy3;Hsp90ab1;Dbn1;Cyfip1;Apoe;Gja1;Rapgef2;Arhgap44;Gpm6a;Plaa;Mag;Hnrnpk;Map2k1;Srgap2;Ptprs;Map1a;Nptx1;Kalrn;Arhgap35;Cdc42;Map2;Wasf1;Cnp;Dlg4;Ptprz1;Stk24;Srcin1;Map1s;Caprin1;Gdi1;Cdk5;Rab21;Dnm2;Cntnap1;Thy1;Usp9x;Pafah1b1
GO:0019693	ribose phosphate metabolic process	http://amigo.geneontology.org/amigo/term/GO:0019693	360	52	15.5992	3.3335	1.57652e-14	1.15828e-12	24642;25014;25045;25282;25288;25630;25741;26759;26956;29223;29562;50671;60416;60666;65152;65248;81530;81654;81743;83782;94194;113976;114114;116643;117243;117272;117287;117533;157074;170587;170851;171053;171116;191575;289217;289950;292804;293829;293991;296488;296849;298942;299739;300047;302950;303179;311422;315150;498909;685232;100359982;100363253	geneontology_Biological_Process_noRedundant	Pfkl;Dnm1l;Coq9;Dbi;Fasn;Pde2a;Park7;Acat1;Atp6v1a;Prpsap2;Pdk2;Pkm;Pfkm;Gpd1;Acsl1;Opa1;Pgam1;Cyc1;Dld;Nt5c2;Pank4;Acot7;Prps1;Itpa;Sdha;Sdhc;Nme1;Ndufb8;Acsl4;Acsl6;Guk1;Map2k1;Pfkp;Gmpr;Ak4;Nme2;Adsl;Mpc2;Adcy9;Dlat;Ola1;Cox6a1;Cox5b;Ak3;Cs;Pdhb;Ndufa12;Vcp;Mcee;Prkaa1;Pdk3;Gpi
GO:0051640	organelle localization	http://amigo.geneontology.org/amigo/term/GO:0051640	416	56	18.0258	3.10666	3.20854e-14	2.22637e-12	24681;24923;25498;25558;25595;25751;26989;29167;29340;29489;29545;29648;54319;56042;58817;59267;60627;63836;64030;64060;64310;64351;64465;64516;64829;65033;65178;79434;81655;83572;83809;84599;85238;85252;89816;114114;116654;117103;117550;140667;140673;140908;170851;171116;171337;171455;289820;294568;298771;300674;301555;308777;310635;314633;363288;500282	geneontology_Biological_Process_noRedundant	Dnm1l;Prepl;Rap1b;Picalm;Prkce;Actr2;Dctn1;Exoc2;Snap91;Stxbp1;Ap3b2;Cadps;Prkcg;Uso1;Dync1h1;Uchl1;Rab11b;Vps45;Ap3m2;Opa1;Rab8a;Xpo1;Synj1;Unc13a;Sec23a;Syt7;Stx12;Kit;Arl8b;Map2k1;Actn4;Napa;Ykt6;Arf1;Kif1a;Ap3d1;Cdc42;Kif5b;Exoc5;Arcn1;Nudc;Map2;Wasf1;Cul3;Ezr;Exoc4;Nsfl1c;Cdk5;Stx1b;Dnm2;Npm1;Dync1li2;Vps33b;Pafah1b1;Tmed10;Arhgef2
GO:0012506	vesicle membrane	http://amigo.geneontology.org/amigo/term/GO:0012506	326	48	14.126	3.398	8.06022e-14	5.29853e-12	24380;25291;25529;25669;25751;26989;29521;29627;54241;56042;58817;59267;64351;64829;65033;65046;65201;79011;79434;81022;81504;83764;84599;85238;93646;94197;114114;116563;116638;117028;117103;117556;140667;140670;287709;288700;288779;290659;295461;299799;300674;304978;306332;308578;310710;312694;613226;687090	geneontology_Cellular_Component_noRedundant	Rab5c;Dnm1l;Stxbp5;Bin1;Flot2;Rab5b;Cadps;Uso1;Copa;Grb2;Rab11b;Ap3m2;Rab8a;Cltc;Ap2s1;Tprg1l;Synj1;Ap2m1;Unc13a;Sec23a;Sec22b;Sec31a;Syt7;Stx12;Sv2b;Ap1m1;Gad2;Slc6a17;Ykt6;Ptprs;Gria2;Arcn1;Scamp1;Clip1;Ap2a1;Slc17a7;Ap2b1;Anxa3;Cope;Rab14;Rab21;Necap1;Dnm2;Sec24b;Cpe;Rab35;Tmed10;Camkv
GO:0031252	cell leading edge	http://amigo.geneontology.org/amigo/term/GO:0031252	276	43	11.9594	3.5955	2.30926e-13	1.41572e-11	24408;24832;25613;25742;25751;29177;29598;50646;54319;56029;58823;64310;64465;65201;79433;81634;81653;81732;83572;83764;83782;84390;114514;114559;116654;140729;140908;171373;171381;191575;289820;294568;296654;303222;308666;310635;313494;314641;360840;360921;362587;683788;684352	geneontology_Cellular_Component_noRedundant	Atp2b1;S100b;Flot2;Clasp2;Macf1;Actr2;Actr3;Grin1;Myh10;Actn1;Ptk2b;Twf2;Slc12a5;Rufy3;Nckap1;Dbn1;Cyfip1;Psd;Pip5k1c;Nme1;Gsn;Arhgap44;Arhgef7;Hpca;Srgap2;Nme2;Arf1;Fscn1;Cdc42;Cacng8;Clip1;Wasf1;Ptprz1;Srcin1;Hcn1;Ezr;Exoc4;Cdk5;Dnm2;Thy1;Tln1;Pafah1b1;Arhgef2
GO:0016358	dendrite development	http://amigo.geneontology.org/amigo/term/GO:0016358	189	35	8.18959	4.27372	2.38032e-13	1.41572e-11	25150;25152;25529;25613;29149;29495;29647;50686;54245;56029;56718;64310;64465;65201;81653;81732;83572;84009;89816;113976;114114;117282;140908;171116;171297;171373;289400;289820;290640;299799;303222;308666;310533;360840;362173	geneontology_Biological_Process_noRedundant	Dnm1l;Nlgn3;Picalm;Cask;Actr2;Actr3;Opa1;Slc12a5;Fyn;Dbn1;Cyfip1;Rapgef2;Arhgap44;Acsl4;Hnrnpk;Strn;Srgap2;Ptprs;Map1a;Arf1;Kalrn;Crk;Cdc42;Clip1;Dlg4;Ptprz1;Srcin1;Map1s;Caprin1;Cdk5;Rab21;Mtor;Camsap2;Gsk3a;Pafah1b1
GO:0060627	regulation of vesicle-mediated transport	http://amigo.geneontology.org/amigo/term/GO:0060627	363	50	15.7292	3.1788	3.34177e-13	1.89721e-11	24366;24681;24923;25528;25558;25595;25751;26989;29177;29340;29411;29495;54319;58817;59267;63836;64202;64310;64465;65178;65248;79434;81022;81664;85238;89816;114114;116563;116590;116638;117028;117103;117550;140670;140673;140908;170851;171337;287606;287709;288779;291245;295461;298771;299799;299858;308578;311193;313409;361532	geneontology_Biological_Process_noRedundant	Rab5c;Dnm1l;Sirpa;Ppt1;Prepl;Stxbp5;Bin1;Rab5b;Actn2;Rap1b;Picalm;Prkce;Arhgap1;Snap91;Sept4;Stxbp1;Cadps;Prkcg;Gnai2;Rab11b;Rab8a;Lrp1;Synj1;Ap2m1;Sec23a;Sirt2;Syt7;Map2k1;Dnajc6;Hpca;Actn4;Napa;Arf1;Calr;Cdc42;Kif5b;Mapk1;Map2;Dlg4;Ezr;Ap2a1;Slc17a7;Ap2b1;Fgb;Cdk5;Stx1b;Rab21;Dnm2;Sec24b;Prkaa1
GO:0010975	regulation of neuron projection development	http://amigo.geneontology.org/amigo/term/GO:0010975	422	54	18.2858	2.95312	7.57172e-13	4.11177e-11	24832;24923;25150;25183;25529;25595;25613;25728;25751;29409;29495;29647;50646;50686;50864;54245;56029;56718;60328;64310;65178;65201;81653;81732;83572;83765;83782;84009;89816;114114;116645;117243;117258;117282;140908;171116;171297;171361;191575;289400;289820;299799;299858;303222;306400;308578;308666;310533;316009;360739;360921;361092;362173;684352	geneontology_Biological_Process_noRedundant	Dnm1l;Nlgn3;Rtn4;Picalm;Cask;Actr2;Actr3;Snap91;Ranbp1;Mark2;Ptk2b;Plxnb1;Twf2;Opa1;Lrp1;Fyn;Rufy3;Dbn1;Cyfip1;Apoe;Rapgef2;Nme1;Arhgap44;Plaa;Acsl6;Mag;Ntm;Hnrnpk;Ptprs;Cntn1;Nme2;Arf1;Kalrn;Arhgap35;Crk;Clip1;Map2;Dlg4;Ptprz1;Stk24;Srcin1;Ap2a1;Caprin1;Gdi1;Cdk5;Stx1b;Rab21;Dnm2;Thy1;Mtor;Camsap2;Gsk3a;Eef1a1;Pafah1b1
GO:0099003	vesicle-mediated transport in synapse	http://amigo.geneontology.org/amigo/term/GO:0099003	177	33	7.66962	4.30269	9.54459e-13	4.96716e-11	24681;24923;25479;25558;25595;25751;26989;29177;29340;54241;59267;64310;64829;65033;65178;85238;89816;114114;116563;116638;117028;117103;140667;140670;140673;140908;171297;171337;298771;308777;313409;314633;361532	geneontology_Biological_Process_noRedundant	Dnm1l;Prepl;Bin1;Nlgn3;Vps35;Rap1b;Picalm;Prkce;Snap91;Stxbp1;Ap3b2;Cadps;Prkcg;Ap3m2;Rab8a;Cltc;Synj1;Ap2m1;Unc13a;Sirt2;Syt7;Stx12;Dnajc6;Hpca;Napa;Arf1;Ap3d1;Map2;Slc17a7;Ap2b1;Cdk5;Stx1b;Dnm2
GO:0006091	generation of precursor metabolites and energy	http://amigo.geneontology.org/amigo/term/GO:0006091	304	44	13.1727	3.34025	1.65956e-12	8.29117e-11	24248;24642;24668;25014;25282;25488;25630;25739;25741;29483;50686;56718;60416;60666;64001;65152;65248;81654;94173;94194;114096;116643;117287;157074;170587;192361;287069;289217;289827;289950;292804;292845;293991;298544;298942;299739;300047;315150;316021;361596;362029;362776;362809;498909	geneontology_Biological_Process_noRedundant	Pfkl;Coq9;Ppp1ca;Cyb5a;Agl;Park7;Acat1;Glrx5;Pkm;Trap1;Pfkm;Gpd1;Pgam1;Cyc1;Dld;Pygb;Sh3bgrl3;Sdha;Sdhc;Ndufb8;Idh3B;Idh2;Ndufa5;Pfkp;Ppp1r2;Adsl;Ugp2;Idh3a;Dlat;Slc1a3;Cox6a1;Cox5b;Cs;Pdhb;Ndufa12;Etfb;Vcp;Epm2aip1;Prkaa1;Mtor;Cat;Gsk3a;Ptges3;Gpi
GO:0010638	positive regulation of organelle organization	http://amigo.geneontology.org/amigo/term/GO:0010638	369	49	15.9892	3.06457	2.31859e-12	1.11381e-10	24654;25479;25498;25537;29167;29340;29384;29489;50646;50686;56718;59267;64303;64310;64465;65248;79256;81504;81661;81732;81824;83809;85238;114114;114764;116590;116725;117550;171116;287931;288620;289350;289820;291245;294568;294864;296654;297518;299809;306400;308666;360593;360739;360950;361532;362361;363064;502674;683788	geneontology_Biological_Process_noRedundant	Plcb1;Rab3gap2;Dnm1l;Arpc1a;Ppm1e;Vps35;Actn2;Cct2;Prkce;Actr2;Dctn1;Actr3;Pfn1;Hnrnpa2b1;Dync1h1;Ranbp1;Cct6a;Grb2;Ptk2b;Arpc4;Opa1;Dstn;Synj1;Cyfip1;Cct5;Sirt2;Mapre1;Wdr1;Syt7;Gsn;H2afy;Rock2;Gmfb;Hnrnpd;Arf1;Arhgap35;Fscn1;Cdc42;Kif5b;Mapk1;Ppm1f;Wasf1;Wdr61;Nsfl1c;Ube2n;Npm1;Prkaa1;Mtor;Gsk3a
GO:0099503	secretory vesicle	http://amigo.geneontology.org/amigo/term/GO:0099503	436	54	18.8924	2.85829	2.80953e-12	1.29967e-10	24366;24380;24923;25045;25291;25529;25558;25669;25673;26989;29411;29495;29521;29627;54241;59267;64030;64060;64202;64465;64516;64829;65033;65178;66031;79434;81022;83532;83764;84599;89816;94197;114114;116638;116654;117028;117103;117556;282587;287061;287606;287709;288700;288779;290527;291969;298942;307641;310710;315676;360915;363288;613226;687090	geneontology_Cellular_Component_noRedundant	Dmxl2;Rab5c;Dnm1l;Ppt1;Stxbp5;Bin1;Flot2;Cttnbp2;Rab5b;Picalm;Dbi;Snap91;Sept4;Wdr7;Stxbp1;Cadps;Rab11b;Cops4;Anxa5;Vps45;Rab8a;Anxa11;Cltc;Tprg1l;Dld;Unc13a;Sec22b;Syt7;Stx12;Sv2b;Kit;Atp6v0d1;Csnk2a2;Gad2;Slc6a17;Ptprs;Gria2;Kif1a;Calr;Cdc42;Scamp1;Rogdi;Dlg4;Exoc4;Slc17a7;Anxa3;Rab14;Fgb;Stx1b;Cpe;Vps33b;Vdac3;Rab35;Tmed10
rno04724	Glutamatergic synapse	http://www.kegg.jp/kegg-bin/show_pathway?rno04724+114117+116590+116638+24398+24400+24408+24416+24418+24654+24681+25023+25636+25686+293508+29482+29483+29495+29546+29627+302950+50664+65040+80850+81664+81672+83579	116	26	5.02642	5.17267	3.17724e-12	1.41727e-10	114117;116590;116638;24398;24400;24408;24416;24418;24654;24681;25023;25636;25686;293508;29482;29483;29495;29546;29627;302950;50664;65040;80850;81664;81672;83579	pathway_KEGG	Plcb1;Dlgap1;Gnb5;Prkcg;Homer1;Grin1;Gnai2;Gnb1;Prkaca;Grm7;Prkacb;Gnai1;Prkcb;Gria2;Slc1a2;Adcy9;Gnao1;Mapk1;Gng3;Slc1a3;Dlg4;Grm5;Slc17a7;Gng2;Gls;Grm3
GO:0001882	nucleoside binding	http://amigo.geneontology.org/amigo/term/GO:0001882	313	44	13.5627	3.2442	4.57701e-12	1.97127e-10	24399;25686;25740;25751;26956;29213;29223;29562;50664;56003;63836;64310;64465;79117;79434;81664;83782;83788;94197;114114;117103;117515;171116;171337;171361;191575;192249;287606;287709;288700;288779;291006;293481;296488;299027;299799;301252;305227;306400;307039;362084;362750;365355;500282	geneontology_Molecular_Function_noRedundant	Rab5c;Dnm1l;Rab5b;Rap1b;Sept3;Atl1;Sept4;Gnaz;Sept11;Gnai2;Rab11b;Opa1;Arf5;Rab8a;Diras2;Hsp90ab1;Prps1;Nme1;Gnai1;Arl8b;Glud1;Actn4;Rras2;Ak4;Tufm;Nme2;Arf1;Ehd3;Arhgap35;Cdc42;Sept9;Gnao1;Ola1;Sept2;Ak3;Rabl6;Rab14;Rab21;Eif2s3;Dnm2;Rab18;Rab35;Eef1a1;Tubb4a
GO:0106027	neuron projection organization	http://amigo.geneontology.org/amigo/term/GO:0106027	68	20	2.94652	6.78767	4.7724e-12	1.98691e-10	24408;24686;25150;25479;29495;29546;29647;56029;64310;64465;81653;81732;83572;114114;140908;171116;171297;289820;303222;362173	geneontology_Biological_Process_noRedundant	Dnm1l;Nlgn3;Vps35;Cask;Actr2;Actr3;Homer1;Grin1;Opa1;Fyn;Dbn1;Prnp;Arhgap44;Arf1;Cdc42;Dlg4;Srcin1;Caprin1;Cdk5;Pafah1b1
GO:0019001	guanyl nucleotide binding	http://amigo.geneontology.org/amigo/term/GO:0019001	318	44	13.7793	3.19319	7.89524e-12	3.11656e-10	24399;25686;25740;25751;26956;29213;29223;29562;50664;56003;64310;64465;79117;79434;81664;81743;83782;83788;94197;114114;117103;117515;171116;171337;171361;191575;192249;287606;287709;288700;288779;291006;293481;296488;299027;299799;301252;305227;306400;307039;362084;362750;365355;500282	geneontology_Molecular_Function_noRedundant	Rab5c;Dnm1l;Rab5b;Rap1b;Pde2a;Sept3;Atl1;Sept4;Gnaz;Sept11;Gnai2;Rab11b;Opa1;Arf5;Rab8a;Diras2;Hsp90ab1;Prps1;Nme1;Gnai1;Arl8b;Glud1;Rras2;Ak4;Tufm;Nme2;Arf1;Ehd3;Arhgap35;Cdc42;Sept9;Gnao1;Ola1;Sept2;Ak3;Rabl6;Rab14;Rab21;Eif2s3;Dnm2;Rab18;Rab35;Eef1a1;Tubb4a
GO:0010720	positive regulation of cell development	http://amigo.geneontology.org/amigo/term/GO:0010720	448	54	19.4124	2.78173	8.21476e-12	3.11656e-10	24408;24418;25150;25183;25613;25728;25751;29409;29495;29647;50646;54245;56718;60328;64030;64202;64310;64465;65178;65201;81653;81732;83572;83765;83782;85238;89816;114114;114705;116645;117028;117243;117258;117282;171116;171297;171361;191575;246216;289820;299799;306400;308578;308666;310533;310635;316009;360739;360921;361092;361532;362173;497198;684352	geneontology_Biological_Process_noRedundant	Dnm1l;Bin1;Nlgn3;Rtn4;Picalm;Impact;Cask;Actr2;Actr3;Snap91;Grin1;Ranbp1;Mark2;Ptk2b;Plxnb1;Twf2;Opa1;Fyn;Rufy3;Dbn1;Synj1;Cyfip1;Apoe;Sirt2;Prpf19;Rapgef2;Nme1;Kit;Plaa;Acsl6;Mag;Hnrnpk;Rgs14;Cntn1;Nme2;Arf1;Calr;Arhgap35;Crk;Cdc42;Clip1;Dlg4;Ptprz1;Stk24;Ap2a1;Grm5;Caprin1;Gdi1;Rab21;Dnm2;Mtor;Eef1a1;Pafah1b1;Arhgef2
GO:0051668	localization within membrane	http://amigo.geneontology.org/amigo/term/GO:0051668	130	27	5.63305	4.79314	8.2343e-12	3.11656e-10	24832;24923;25252;25479;25751;29177;29495;58817;58948;64053;81653;84009;85238;93646;116563;117103;140670;140729;140908;170851;266777;295461;296654;303222;314633;314721;361532	geneontology_Biological_Process_noRedundant	Dlg2;Vps35;Dlg3;Rab8a;Dbn1;Synj1;Ap2m1;Sec23a;Sirt2;Sec31a;Gsn;Arhgap44;Map2k1;Hpca;Nptx1;Kalrn;Ap3d1;Cacng8;Dlg1;Dlg4;Anks1b;Ap2b1;Cdk5;Stx1b;Dnm2;Sec24b;Thy1
GO:0000904	cell morphogenesis involved in differentiation	http://amigo.geneontology.org/amigo/term/GO:0000904	462	55	20.019	2.74739	8.5425e-12	3.11746e-10	24832;25150;25152;25183;25275;25529;25558;25595;25613;25728;25751;29409;29423;29495;29545;29647;54245;56029;60328;63836;64202;64465;65178;65208;79559;81653;81732;83572;83765;84009;89816;114114;117103;140908;171116;171297;266777;289820;289992;290640;295461;299799;301252;303222;306400;308666;310533;316009;360921;360950;362173;362750;363445;684352;100361417	geneontology_Biological_Process_noRedundant	Dnm1l;Nlgn3;Rtn4;Picalm;Cask;Actr2;Dpysl5;Actr3;Snap91;Atl1;Stxbp1;Uchl1;Gap43;Mark2;Plxnb1;Twf2;Opa1;Alcam;Rab8a;Fyn;Rufy3;Hsp90ab1;Dbn1;Cyfip1;Apoe;Tbcd;Wdr1;Rapgef2;Arhgap44;Mag;Actn4;Ptprs;Map1a;Fermt2;Nptx1;Kalrn;Calr;Arhgap35;Crk;Cdc42;Map2;Cnp;Dlg4;Ptprz1;Srcin1;Map1s;Caprin1;Gdi1;Cdk5;Rab21;Dnm2;Sec24b;Thy1;Usp9x;Pafah1b1
GO:0030427	site of polarized growth	http://amigo.geneontology.org/amigo/term/GO:0030427	160	30	6.93299	4.32714	8.98226e-12	3.11746e-10	24586;24832;25595;25613;25751;29423;29627;29753;50646;58948;64160;81653;83572;83825;114559;116654;117550;140908;171114;192213;192361;252881;301252;306439;308666;360921;361532;363445;683788;684352	geneontology_Cellular_Component_noRedundant	Ndrg2;Dlg3;Ncam1;Dclk1;Basp1;Gap43;Ywhae;Ptk2b;Twf2;Rufy3;Hsp90ab1;Dbn1;Cyfip1;Sirt2;Exoc3;Gpm6a;Arhgef7;Ppp1r2;Gria2;Fscn1;Kif5b;Map2;Ptprz1;Exoc4;Cdk5;Dnm2;Thy1;Usp9x;Rasgrf1;Pafah1b1
GO:0030029	actin filament-based process	http://amigo.geneontology.org/amigo/term/GO:0030029	490	57	21.2323	2.68459	8.98548e-12	3.11746e-10	25230;25252;25537;25725;29340;50646;54245;54319;56718;58823;63836;64030;64159;64185;64202;64303;64310;64465;79215;79433;81504;81634;81653;81661;81732;81814;81824;83572;114559;116653;116724;140908;286993;287931;289820;291245;294568;296654;297518;300768;303222;305332;306400;308666;309557;310635;313494;314212;360593;360840;360921;360950;404781;501083;502674;683788;684352	geneontology_Biological_Process_noRedundant	Pdcd6ip;Arpc1a;Ppm1e;Add3;Actn2;Epb41l3;Prkce;Actr2;Actr3;Sptan1;Pfn1;Myh10;Actn1;Grb2;Mtpn;Prkar1a;Tmsb4x;Ptk2b;Twf2;Coro2b;Arpc4;Rufy3;Nckap1;Dstn;Dbn1;Cyfip1;Wdr1;Taok1;Gsn;Arhgap44;Kit;Iqsec3;Arhgef7;Rock2;Epb41l2;Gmfb;Actn4;Daam1;Srgap2;Cap2;Arf1;Calr;Arhgap35;Fscn1;Crk;Cdc42;Dlg1;Ppm1f;Wasf1;Ezr;Cdk5;Limch1;Mtor;Tln1;Cap1;Pafah1b1;Arhgef2
GO:0032386	regulation of intracellular transport	http://amigo.geneontology.org/amigo/term/GO:0032386	296	42	12.826	3.27459	1.04459e-11	3.40628e-10	24681;24686;24923;25150;25183;25558;25595;29167;29177;29340;29489;29753;54319;58817;59267;64310;64465;65248;79434;81653;81732;81743;85252;89816;114114;116590;117287;117550;140673;140908;170851;171337;291245;295461;298771;299799;301252;304859;306182;311193;315215;360921	geneontology_Biological_Process_noRedundant	Dnm1l;Prepl;Actn2;Rap1b;Picalm;Prkce;Arhgap1;Dctn1;Pde2a;Actr3;Stxbp1;Prkcg;Dync1h1;Park7;Ywhae;Rab11b;Fyn;Rufy3;Hsp90ab1;Xpo1;Dbn1;Sec23a;Syt7;Prnp;Dhx9;Map2k1;Hpca;Napa;Arf1;Cdc42;Kif5b;Mapk1;Map2;Ezr;Gdi1;Cdk5;Stx1b;Rab21;Sec24b;Mlc1;Prkaa1;Ipo5
GO:0030135	coated vesicle	http://amigo.geneontology.org/amigo/term/GO:0030135	141	28	6.10969	4.58288	1.05894e-11	3.40628e-10	25751;29521;54241;56042;58817;64060;64310;65046;65178;84599;89816;93646;94197;114114;116563;117103;140670;288700;290659;295461;299858;300674;304978;306332;308578;310710;312694;315215	geneontology_Cellular_Component_noRedundant	Dnm1l;Picalm;Snap91;Uso1;Copa;Rab8a;Lrp1;Cltc;Ap2s1;Ap2m1;Sec23a;Sec22b;Sec31a;Ap1m1;Arf1;Arcn1;Scamp1;Ap2a1;Ap2b1;Cope;Rab14;Necap1;Dnm2;Sec24b;Mlc1;Vps33b;Rab35;Tmed10
GO:0031346	positive regulation of cell projection organization	http://amigo.geneontology.org/amigo/term/GO:0031346	321	44	13.9093	3.16335	1.0884e-11	3.40628e-10	24408;25150;25183;25613;25728;25751;29495;29647;50646;56718;60328;64030;64310;64465;65178;65201;81653;81732;83572;83782;89816;114114;116645;117243;117258;117282;171116;171297;171361;191575;289820;299799;306400;306439;308578;308666;310533;316009;360739;360921;361092;362173;683788;684352	geneontology_Biological_Process_noRedundant	Dnm1l;Nlgn3;Picalm;Cask;Actr2;Actr3;Snap91;Grin1;Ranbp1;Mark2;Ptk2b;Plxnb1;Twf2;Opa1;Fyn;Rufy3;Dbn1;Cyfip1;Apoe;Rapgef2;Nme1;Gpm6a;Kit;Plaa;Acsl6;Hnrnpk;Cntn1;Nme2;Arf1;Arhgap35;Fscn1;Cdc42;Clip1;Dlg4;Ptprz1;Stk24;Ap2a1;Caprin1;Gdi1;Rab21;Dnm2;Mtor;Eef1a1;Pafah1b1
GO:0044309	neuron spine	http://amigo.geneontology.org/amigo/term/GO:0044309	182	32	7.88627	4.05768	1.09088e-11	3.40628e-10	24213;24408;24418;24668;25613;25751;29149;29177;29482;29483;29495;29546;29598;29627;29715;50646;64465;65180;81634;81653;114705;117103;117282;192361;282587;303222;305227;306439;308666;314721;317385;360840	geneontology_Cellular_Component_noRedundant	Atp2b1;Ppp1ca;Cttnbp2;Homer1;Grin1;Sept11;Actn1;Ptk2b;Rab8a;Dbn1;Cyfip1;Kcnd2;Fus;Arhgap44;Gpm6a;Hnrnpk;Rgs14;Hpca;Ppp1r2;Strn;Srgap2;Slc8a1;Gria2;Slc1a2;Atp1a3;Cdc42;Slc1a3;Dlg4;Ptprz1;Anks1b;Grm5;Dnm2
GO:0022604	regulation of cell morphogenesis	http://amigo.geneontology.org/amigo/term/GO:0022604	348	46	15.0792	3.05055	1.31378e-11	4.00223e-10	24832;25150;25183;25529;25595;25613;25728;25742;25751;29409;29495;29647;50646;54245;54319;56029;58817;60328;63836;64030;64202;64465;65178;79433;81653;81732;83572;83765;89816;114114;116645;117282;140908;171116;171297;289820;299799;303222;306400;308666;310533;316009;360921;360950;362173;684352	geneontology_Biological_Process_noRedundant	Dnm1l;S100b;Nlgn3;Rtn4;Picalm;Cask;Actr2;Actr3;Snap91;Myh10;Mark2;Ptk2b;Plxnb1;Twf2;Opa1;Fyn;Rufy3;Dbn1;Cyfip1;Apoe;Sec23a;Wdr1;Rapgef2;Arhgap44;Kit;Plaa;Mag;Hnrnpk;Actn4;Ptprs;Calr;Arhgap35;Crk;Cdc42;Map2;Dlg4;Ptprz1;Srcin1;Ezr;Caprin1;Gdi1;Cdk5;Rab21;Dnm2;Thy1;Pafah1b1
GO:0005740	mitochondrial envelope	http://amigo.geneontology.org/amigo/term/GO:0005740	497	57	21.5356	2.64678	1.59408e-11	4.74049e-10	24248;24392;24788;25035;25275;25282;25288;25488;25721;25750;26956;29154;29483;56718;64201;79563;81743;81805;83532;83782;94194;113976;114114;114766;117099;117243;117287;157074;171116;171155;191575;287069;287721;288150;289217;290652;291709;293991;294560;294568;295923;299739;300047;300111;301123;304542;306840;312444;312890;315167;317191;361385;362440;498909;502749;681418;100359982	geneontology_Cellular_Component_noRedundant	Dnm1l;Ndufa6;Coq9;Sirt5;Pde2a;Park7;Mtx2;Trap1;Acsl1;Opa1;Ndufa11;Cyc1;Capn2;Gja1;Sdha;Sdhc;Nme1;Samm50;Ndufb8;Acsl4;Acsl6;Ndufa5;Coq5;Slc25a11;Agk;Fkbp8;Nme2;Mpc2;Immt;Mcu;Wasf1;Hadhb;Slc1a3;Cnp;Vat1;Gdap1;Grpel1;Cox6a1;Ndufa9;Slc25a46;Cox5b;Ak3;Got2;Apool;Bdh1;Phb2;Ndufa12;Ndufb7;Cyb5r3;Mtor;Suox;Cat;Ndufs3;Vdac3;Ndufb10;Sord;Maob
GO:0006897	endocytosis	http://amigo.geneontology.org/amigo/term/GO:0006897	418	51	18.1124	2.81575	2.04419e-11	5.93765e-10	24681;24923;25291;25528;25751;29177;29411;29495;29521;29627;54241;54319;59267;63836;64185;64202;64310;64465;65046;65178;81504;85238;89816;94197;114114;116563;116590;116638;117028;117277;140670;140729;140908;171297;191575;207119;287709;288779;290527;294568;296654;297797;299799;299858;308578;312694;313409;314641;315215;361532;100362805	geneontology_Biological_Process_noRedundant	Rab5c;Dnm1l;Sirpa;Ppt1;Bin1;Rab5b;Nlgn3;Picalm;Rin1;Snap91;Prkcg;Grb2;Lrp1;Anxa11;Cltc;Ap2s1;Synj1;Epn1;Ap2m1;Sirt2;Syt7;Pip5k1c;Nme1;Gsn;Dnajc6;Hpca;Actn4;Gria2;Arf1;Calr;Cdc42;Cacng8;Mapk1;Scamp1;Wasf1;Txndc5;Dlg4;Atp6v1h;Ezr;Ap2a1;Slc17a7;Ap2b1;Anxa3;Rab14;Cdk5;Stx1b;Rab21;Necap1;Dnm2;Mlc1;Cap1
rno00020	Citrate cycle (TCA cycle)	http://www.kegg.jp/kegg-bin/show_pathway?rno00020+114096+157074+170587+24368+25104+25179+289217+289950+298942+360975+361042+361596+81654+94173	33	14	1.42993	9.7907	2.7413e-11	7.75758e-10	114096;157074;170587;24368;25104;25179;289217;289950;298942;360975;361042;361596;81654;94173	pathway_KEGG	Pck2;Fh;Dld;Ogdh;Pc;Sdha;Sdhc;Idh3B;Idh2;Idh3g;Idh3a;Dlat;Cs;Pdhb
GO:0061564	axon development	http://amigo.geneontology.org/amigo/term/GO:0061564	305	42	13.216	3.17796	2.79496e-11	7.75758e-10	24586;24832;25152;25183;25275;25529;25558;25595;25613;25728;25751;29409;29423;29545;50568;60328;65178;65208;79559;81653;81732;83572;83765;84009;89816;114122;117103;140908;171297;266777;289400;290640;299799;301252;306400;308666;316009;360921;361092;362750;363445;684352	geneontology_Biological_Process_noRedundant	Nlgn3;Rtn4;Picalm;Dpysl5;Actr3;Snap91;Ncam1;Atl1;Stxbp1;Uchl1;Gap43;Mark2;Plxnb1;Twf2;Alcam;Rab8a;Rufy3;Hsp90ab1;Dbn1;Cyfip1;Apoe;Mag;Ptprs;Map1a;Nptx1;Kalrn;Arhgap35;Map2;Cnp;Ptprz1;Stk24;Map1s;Gdi1;Cdk5;Rab21;Dnm2;Vcan;Thy1;Cspg5;Usp9x;Camsap2;Pafah1b1
GO:0050803	regulation of synapse structure or activity	http://amigo.geneontology.org/amigo/term/GO:0050803	201	33	8.70956	3.78894	3.54716e-11	9.63132e-10	24408;24686;24923;25150;25479;25529;25751;29423;29546;29647;56029;64465;65178;79433;81653;81732;83572;84009;89816;114114;116643;117282;140908;171116;171297;266777;282587;289820;303222;305227;306439;308666;362173	geneontology_Biological_Process_noRedundant	Dnm1l;Cttnbp2;Nlgn3;Vps35;Picalm;Cask;Actr2;Actr3;Snap91;Homer1;Grin1;Gap43;Myh10;Sept11;Opa1;Fyn;Dbn1;Cyfip1;Prnp;Arhgap44;Gpm6a;Hnrnpk;Ptprs;Nptx1;Kalrn;Cdc42;Srcin1;Caprin1;Cdk5;Stx1b;Dnm2;Vcp;Pafah1b1
GO:0050808	synapse organization	http://amigo.geneontology.org/amigo/term/GO:0050808	296	41	12.826	3.19663	4.01723e-11	1.06756e-09	24408;24686;25150;25479;25529;29423;29495;29546;29647;56029;58948;64303;64310;64465;64829;65040;65178;79433;81653;81732;83572;84009;89816;114114;114559;116643;117282;140908;171114;171116;171297;266777;282587;289820;294568;303222;305227;306439;308666;362173;404781	geneontology_Biological_Process_noRedundant	Dnm1l;Ndrg2;Cttnbp2;Nlgn3;Vps35;Dlgap1;Picalm;Cask;Dlg3;Actr2;Actr3;Snap91;Pfn1;Homer1;Grin1;Gap43;Myh10;Sept11;Opa1;Fyn;Dbn1;Cyfip1;Unc13a;Prnp;Arhgap44;Gpm6a;Iqsec3;Hnrnpk;Arhgef7;Ptprs;Arf1;Nptx1;Kalrn;Cdc42;Wasf1;Dlg4;Srcin1;Caprin1;Cdk5;Vcp;Pafah1b1
GO:1903827	regulation of cellular protein localization	http://amigo.geneontology.org/amigo/term/GO:1903827	338	44	14.6459	3.00425	6.18662e-11	1.60981e-09	24686;25150;25183;25479;25498;25595;25686;29167;29177;29272;29384;29738;29753;54319;64465;65248;79434;81653;81732;81743;83809;84009;85252;116549;116590;117282;117287;117550;140670;140908;170851;171140;287931;288620;291245;294864;296654;299809;299858;301252;306182;309557;310698;360921	geneontology_Biological_Process_noRedundant	Vps35;Actn2;Cct2;Dctn1;Pde2a;Actr3;Park7;Cct6a;Ywhae;Rab11b;Lrp1;Fyn;Rufy3;Hsp90ab1;Xpo1;Dbn1;Cct5;Csnk2a1;Prnp;Gsn;Gnai1;H2afy;Kcnab2;Hnrnpk;Map2k1;Hpca;Epb41l2;Dclk2;Kalrn;Cdc42;Kif5b;Mapk1;Ppm1f;Dpp6;Map2;Ezr;Ap2b1;Gdi1;Nsfl1c;Cdk5;Camk2g;Npm1;Prkaa1;Ipo5
GO:0051258	protein polymerization	http://amigo.geneontology.org/amigo/term/GO:0051258	184	31	7.97293	3.88815	7.13583e-11	1.81891e-09	24366;25230;25595;29167;29213;29328;29340;50646;56718;64159;64303;64310;79215;81504;81653;81661;81732;81814;81824;114114;114514;114764;171116;289400;289820;294568;296654;297518;308666;684352;100361417	geneontology_Biological_Process_noRedundant	Dnm1l;Arpc1a;Clasp2;Add3;Prkce;Actr2;Dctn1;Actr3;Sptan1;Pfn1;Grb2;Mtpn;Tmsb4x;Ptk2b;Twf2;Arpc4;Opa1;Dbn1;Cyfip1;Tbcd;Mapre1;Gsn;Gmfb;Arf1;Gpx4;Map2;Wasf1;Fgb;Mtor;Camsap2;Tubb4a
GO:0003779	actin binding	http://amigo.geneontology.org/amigo/term/GO:0003779	279	39	12.0894	3.22597	9.19842e-11	2.29777e-09	25037;25152;25230;29177;29340;54319;63836;64159;64185;64303;79433;81634;81653;81661;81732;81814;81824;116653;116724;289820;289992;290640;291245;294568;296654;297518;300768;305332;309557;313494;313867;314212;360950;361422;362587;497198;502674;683788;684352	geneontology_Molecular_Function_noRedundant	Arpc1a;Macf1;Add3;Actn2;Epb41l3;Impact;Prkce;Actr2;Actr3;Sptan1;Pfn1;Myh10;Actn1;Tmsb4x;Twf2;Coro2b;Arpc4;Dstn;Dbn1;Wdr1;Gsn;Hpca;Epb41l2;Gmfb;Actn4;Lrpprc;Daam1;Cap2;Map1a;Fermt2;Fscn1;Cotl1;Wasf1;Map1s;Ezr;Mobp;Limch1;Tln1;Cap1
rno04961	Endocrine and other factor-regulated calcium reabsorption	http://www.kegg.jp/kegg-bin/show_pathway?rno04961+116563+140670+24213+24214+24654+24681+25023+25636+25751+293508+29598+29715+302950+308578+54241+65046+81637	56	17	2.42655	7.00585	1.10195e-10	2.67724e-09	116563;140670;24213;24214;24654;24681;25023;25636;25751;293508;29598;29715;302950;308578;54241;65046;81637	pathway_KEGG	Plcb1;Atp2b1;Prkcg;Prkaca;Cltc;Ap2s1;Ap2m1;Prkacb;Prkcb;Ap2a2;Slc8a1;Atp1a3;Adcy9;Ap2a1;Ap2b1;Dnm2;Atp1b2
rno04723	Retrograde endocannabinoid signaling	http://www.kegg.jp/kegg-bin/show_pathway?rno04723+114117+116590+116638+24400+24418+24654+24681+25023+25488+25636+25686+29254+293508+293991+295923+29627+299739+301123+302950+309207+315167+361385+362440+50664+681418+80850+81664+83579	155	28	6.71633	4.16894	1.11463e-10	2.67724e-09	114117;116590;116638;24400;24418;24654;24681;25023;25488;25636;25686;29254;293508;293991;295923;29627;299739;301123;302950;309207;315167;361385;362440;50664;681418;80850;81664;83579	pathway_KEGG	Plcb1;Ndufa6;Mgll;Gnb5;Prkcg;Gnai2;Gnb1;Prkaca;Ndufa11;Prkacb;Ndufb8;Gnai1;Ndufa5;Prkcb;Gria2;Adcy9;Gnao1;Mapk1;Gng3;Ndufa9;Grm5;Slc17a7;Gng2;Ndufa12;Ndufb7;Ndufs3;Dagla;Ndufb10
GO:1990204	oxidoreductase complex	http://amigo.geneontology.org/amigo/term/GO:1990204	89	21	3.85647	5.44539	1.40467e-10	3.31024e-09	25062;25488;29711;60666;81530;81654;94173;114096;117287;157074;289217;289950;293991;295923;298942;299739;300047;301123;361385;362440;681418	geneontology_Cellular_Component_noRedundant	Gpd2;Park7;Pdk2;Gpd1;Ndufa11;Cyc1;Dld;Sdha;Sdhc;Ndufb8;Idh3B;Ndufa5;Idh3a;Dlat;Ndufa9;Bckdhb;Pdhb;Ndufa12;Ndufb7;Ndufs3;Ndufb10
GO:0099072	regulation of postsynaptic membrane neurotransmitter receptor levels	http://amigo.geneontology.org/amigo/term/GO:0099072	73	19	3.16318	6.00662	1.72332e-10	3.98598e-09	24923;25252;25479;25751;29177;29495;29753;58948;83764;84009;85238;116563;117103;140670;140729;170851;266777;303222;361532	geneontology_Biological_Process_noRedundant	Flot2;Vps35;Dlg3;Ywhae;Rab8a;Synj1;Ap2m1;Sirt2;Arhgap44;Map2k1;Hpca;Nptx1;Kalrn;Cacng8;Dlg1;Dlg4;Ap2b1;Stx1b;Dnm2
GO:0097435	supramolecular fiber organization	http://amigo.geneontology.org/amigo/term/GO:0097435	449	51	19.4557	2.62134	2.78307e-10	6.32009e-09	25152;25230;25252;25595;25725;29167;29213;29340;29345;29489;50646;54319;56718;63836;64060;64159;64185;64303;64310;64465;79215;79433;81504;81634;81653;81661;81732;81814;81824;83572;114514;114764;116653;287931;289400;289820;291245;294568;296654;297518;301252;306400;308666;310635;360593;360921;360950;502674;683788;684352;100361417	geneontology_Biological_Process_noRedundant	Arpc1a;Ppm1e;Clasp2;Add3;Actn2;Prkce;Actr2;Dctn1;Actr3;Sptan1;Pfn1;Dync1h1;Myh10;Actn1;Grb2;Mtpn;Prkar1a;Tmsb4x;Ptk2b;Twf2;Arpc4;Rufy3;Hsp90ab1;Dstn;Dbn1;Cyfip1;Tbcd;Mapre1;Wdr1;Gsn;Gmfb;Actn4;Serpinh1;Cap2;Map1a;Arf1;Arhgap35;Fscn1;Cdc42;Dlg1;Ppm1f;Map2;Wasf1;Ezr;Mtor;Cap1;Vps33b;Camsap2;Pafah1b1;Arhgef2;Tubb4a
GO:0006887	exocytosis	http://amigo.geneontology.org/amigo/term/GO:0006887	265	37	11.4828	3.22222	2.91195e-10	6.49469e-09	24366;24681;24923;25291;25558;26989;29340;56029;59267;60627;64030;64060;64310;64351;64465;64516;64829;79434;81022;81664;84599;85238;114114;116654;117103;140673;140908;171337;171455;252881;287606;298771;299799;303222;311731;314641;502776	geneontology_Biological_Process_noRedundant	Dnm1l;Prepl;Stxbp5;Rap1b;Prkce;Exoc2;Sept4;Stxbp1;Cadps;Prkcg;Gnai2;Rab11b;Vps45;Rab8a;Scrn1;Synj1;Unc13a;Syt7;Exoc3;Pip5k1c;Arhgap44;Kit;Napa;Ykt6;Arf1;Cdc42;Exoc5;Srcin1;Exoc4;Scrn3;Anxa3;Fgb;Cdk5;Stx1b;Rab21;Vps33b;Tmed10
GO:0099177	regulation of trans-synaptic signaling	http://amigo.geneontology.org/amigo/term/GO:0099177	375	45	16.2492	2.76937	5.5838e-10	1.22354e-08	24408;24416;24418;24586;24681;24686;24923;25045;25150;25558;25686;25742;29340;29411;29495;29546;29627;50646;56718;59267;64030;64310;64829;81653;81664;81672;81827;89791;114114;114705;116590;117103;117282;117550;140673;140729;140908;171140;171297;171337;192213;298771;308666;310533;687090	geneontology_Biological_Process_noRedundant	Dnm1l;Ppt1;Prepl;S100b;Nlgn3;Rap1b;Dbi;Prkce;Ncam1;Stxbp1;Prkcg;Homer1;Grin1;Gnai2;Ptk2b;Grm7;Rab8a;Fyn;Tprg1l;Dbn1;Cyfip1;Unc13a;Syt7;Prnp;Rapgef2;Gnai1;Kit;Ncdn;Hnrnpk;Rgs14;Napa;Gria2;Arf1;Cacng8;Kif5b;Mapk1;Dlg4;Grm5;Cdk5;Stx1b;Psmc5;Camk2g;Mtor;Rasgrf1;Grm3
GO:0007215	glutamate receptor signaling pathway	http://amigo.geneontology.org/amigo/term/GO:0007215	78	19	3.37983	5.62158	5.92786e-10	1.27653e-08	24213;24408;24416;24418;24654;24686;25150;25291;29495;29546;29627;50646;81664;81672;84009;117287;140729;171297;309207	geneontology_Biological_Process_noRedundant	Plcb1;Nlgn3;Homer1;Grin1;Park7;Gnai2;Ptk2b;Grm7;Fyn;Prnp;Gria2;Kalrn;Atp1a3;Cacng8;Dlg4;Grm5;Anxa3;Dagla;Grm3
GO:0007163	establishment or maintenance of cell polarity	http://amigo.geneontology.org/amigo/term/GO:0007163	146	26	6.32635	4.10979	7.14874e-10	1.49019e-08	25252;29167;50646;54245;54319;58948;60328;64053;64185;64465;65178;83572;83764;83809;116653;116654;171337;289820;296654;301252;306400;310635;360921;360950;501083;683788	geneontology_Biological_Process_noRedundant	Dlg2;Pdcd6ip;Flot2;Rap1b;Dlg3;Actr2;Dctn1;Snap91;Mark2;Ptk2b;Rufy3;Hsp90ab1;Wdr1;Gsn;Cap2;Arhgap35;Fscn1;Crk;Cdc42;Dlg1;Ezr;Exoc4;Nsfl1c;Cap1;Pafah1b1;Arhgef2
GO:0051962	positive regulation of nervous system development	http://amigo.geneontology.org/amigo/term/GO:0051962	447	50	19.369	2.58144	7.15862e-10	1.49019e-08	24408;24418;25150;25183;25613;25728;25742;29409;29495;29647;50646;56718;60328;64030;64310;65178;65201;81653;81732;83572;83765;83782;85238;89816;114114;114705;116645;117028;117243;117258;117282;171116;171297;171361;191575;246216;289820;299799;306400;308578;308666;310533;310635;316009;360739;360921;361092;362173;497198;684352	geneontology_Biological_Process_noRedundant	Dnm1l;Bin1;S100b;Nlgn3;Rtn4;Picalm;Impact;Cask;Actr2;Actr3;Snap91;Grin1;Ranbp1;Mark2;Ptk2b;Plxnb1;Twf2;Opa1;Fyn;Rufy3;Dbn1;Synj1;Cyfip1;Apoe;Prpf19;Rapgef2;Nme1;Kit;Plaa;Acsl6;Mag;Hnrnpk;Rgs14;Cntn1;Nme2;Arf1;Arhgap35;Clip1;Dlg4;Ptprz1;Stk24;Ap2a1;Grm5;Caprin1;Gdi1;Rab21;Mtor;Eef1a1;Pafah1b1;Arhgef2
GO:0048475	coated membrane	http://amigo.geneontology.org/amigo/term/GO:0048475	71	18	3.07651	5.85078	8.33096e-10	1.7058e-08	54241;58817;65046;85238;93646;114114;116563;140667;140670;290659;295461;300674;304978;306332;308578;308777;312694;314633	geneontology_Cellular_Component_noRedundant	Dnm1l;Ap3b2;Copa;Ap3m2;Cltc;Ap2s1;Synj1;Ap2m1;Sec23a;Sec31a;Ap1m1;Ap3d1;Arcn1;Ap2a1;Ap2b1;Cope;Necap1;Sec24b
GO:0099513	polymeric cytoskeletal fiber	http://amigo.geneontology.org/amigo/term/GO:0099513	464	51	20.1057	2.5366	8.89622e-10	1.79216e-08	24392;25150;25152;25595;25728;25751;29167;29213;29489;29648;29715;29738;50686;54319;60328;64862;65201;81653;81655;81732;83572;83782;85238;114114;114514;114705;114764;117028;117550;140908;170714;170851;191575;288620;289400;290640;294864;298848;299625;299809;299850;310635;310698;360950;361532;362587;362809;363288;499846;500988;684352	geneontology_Cellular_Component_noRedundant	Dnm1l;Bin1;Clasp2;Macf1;Cct2;Dctn1;Actr3;Dync1h1;Cct6a;Mark2;Twf2;Fyn;Dynlrb1;Dbn1;Synj1;Apoe;Cct5;Sirt2;Mapre1;Wdr1;Gja1;Nme1;Kcnab2;Map2k1;Rgs14;Dclk2;Map1a;Nme2;Slc8a1;Kif1a;Kif5b;Nudc;Dctn2;Clip1;Map2;Tcp11l1;Map1s;Ezr;Mapre3;Lmnb2;Cdk5;Dnm2;Ddx6;Map1lc3b;Dync1li2;Camsap2;Gsk3a;Ptges3;Pafah1b1;Arhgef2;Tubb4a
GO:0015629	actin cytoskeleton	http://amigo.geneontology.org/amigo/term/GO:0015629	319	40	13.8226	2.8938	1.43602e-09	2.84697e-08	25037;25150;29167;54245;54319;56029;60328;63836;64159;64185;79215;79433;81634;81653;81732;81824;83764;116653;117282;282587;289820;289992;291245;296654;297518;299850;304859;305227;310635;313231;314212;316333;360950;362375;362587;362809;501083;502674;683788;684352	geneontology_Cellular_Component_noRedundant	Pdcd6ip;Arpc1a;Flot2;Macf1;Cttnbp2;Actn2;Actr2;Dctn1;Actr3;Sptan1;Myh10;Sept11;Actn1;Mark2;Mtpn;Twf2;Lancl2;Actr1b;Arpc4;Fyn;Dstn;Dbn1;Wdr1;Gsn;Dhx9;Hnrnpk;Actn4;Daam1;Cap2;Fermt2;Fscn1;Crk;Dctn2;Srcin1;Ezr;Mobp;Alg2;Cap1;Ptges3;Arhgef2
GO:0099504	synaptic vesicle cycle	http://amigo.geneontology.org/amigo/term/GO:0099504	163	27	7.06298	3.82275	1.78643e-09	3.48633e-08	24681;24923;25558;25751;26989;29340;54241;59267;64829;65033;65178;81022;85238;89816;114114;116563;116638;116645;117028;140673;140908;171297;171337;298771;308666;313409;314633	geneontology_Biological_Process_noRedundant	Dnm1l;Prepl;Stxbp5;Bin1;Nlgn3;Rap1b;Picalm;Prkce;Snap91;Stxbp1;Cadps;Prkcg;Cltc;Synj1;Cyfip1;Ap2m1;Unc13a;Syt7;Stx12;Plaa;Dnajc6;Napa;Ap3d1;Slc17a7;Cdk5;Stx1b;Dnm2
GO:0031503	protein-containing complex localization	http://amigo.geneontology.org/amigo/term/GO:0031503	177	28	7.66962	3.65077	2.61714e-09	5.02894e-08	24923;25252;25479;25498;25751;29177;29236;29495;54319;58948;64053;81653;84009;85238;85252;116563;117103;140670;140729;170851;252881;266777;287444;303222;314633;314721;361532;362361	geneontology_Biological_Process_noRedundant	Dlg2;Vps35;Dlg3;Hnrnpa2b1;Eif5a;Rab8a;Xpo1;Dbn1;Synj1;Ap2m1;Sirt2;Exoc3;Arhgap44;Map2k1;Rpsa;Hpca;Nptx1;Kalrn;Ap3d1;Cacng8;Dlg1;Dlg4;Ezr;Anks1b;Ap2b1;Stx1b;Dnm2;Npm1
GO:0090066	regulation of anatomical structure size	http://amigo.geneontology.org/amigo/term/GO:0090066	397	45	17.2025	2.6159	3.45687e-09	6.54187e-08	24250;24366;24392;25183;25230;25498;25529;25595;25728;25751;29254;29340;29409;50646;54319;56718;64159;64303;64310;79215;81504;81653;81661;81732;81814;81824;83572;83765;140908;170851;171373;289820;291245;291624;294568;296654;297518;299799;301252;306400;308666;360921;360950;502674;684352	geneontology_Biological_Process_noRedundant	Arpc1a;Add3;Actn2;Rtn4;Prkce;Mgll;Actr2;Actr3;Sptan1;Pfn1;Lars;Grb2;Mtpn;Tmsb4x;Ptk2b;Twf2;Arpc4;Slc12a5;Rufy3;Hsp90ab1;Dstn;Dbn1;Cyfip1;Apoe;Wdr1;Cbs;Gja1;Gsn;Mag;Map2k1;Gmfb;Ptprs;Arf1;Arhgap35;Map2;Wasf1;Ezr;Gdi1;Fgb;Cdk5;Rab21;Dnm2;Npm1;Mtor;Pafah1b1
GO:0072657	protein localization to membrane	http://amigo.geneontology.org/amigo/term/GO:0072657	371	43	16.0759	2.67482	3.96901e-09	7.39895e-08	24686;24832;24923;25150;25183;25252;25479;25558;29177;29272;29495;29647;54319;58817;58948;60627;64053;79434;81653;81732;83764;84009;116549;116654;117103;117550;140670;140908;170851;171140;266777;289992;291245;294708;296654;299858;300111;303222;313928;314633;316415;362587;502749	geneontology_Biological_Process_noRedundant	Dlg2;Flot2;Macf1;Vps35;Actn2;Sgtb;Cask;Dlg3;Fam126b;Actr3;Stxbp1;Rab11b;Rab8a;Lrp1;Fyn;Dbn1;Sec23a;Csnk2a1;Prnp;Samm50;Gsn;Arhgap44;Map2k1;Agk;Hpca;Fermt2;Nptx1;Kalrn;Ap3d1;Kif5b;Exoc5;Dlg1;Dpp6;Efr3b;Dlg4;Ezr;Exoc4;Ap2b1;Gdi1;Cdk5;Stx1b;Thy1;Camk2g
GO:0060076	excitatory synapse	http://amigo.geneontology.org/amigo/term/GO:0060076	54	15	2.33988	6.41058	5.46708e-09	1.00417e-07	24215;24408;29495;29546;50864;64303;64829;65178;81653;81732;85238;89816;116638;171297;308666	geneontology_Cellular_Component_noRedundant	Nlgn3;Picalm;Actr3;Snap91;Pfn1;Homer1;Grin1;Atp2b2;Dbn1;Synj1;Cyfip1;Unc13a;Ntm;Dlg4;Slc17a7
rno04721	Synaptic vesicle cycle	http://www.kegg.jp/kegg-bin/show_pathway?rno04721+116563+116638+140670+140673+24923+25558+25751+291969+297797+299971+308578+54241+64829+65046+685232+81637	63	16	2.72986	5.8611	7.0657e-09	1.27899e-07	116563;116638;140670;140673;24923;25558;25751;291969;297797;299971;308578;54241;64829;65046;685232;81637	pathway_KEGG	Stxbp1;Atp6v1c1;Atp6v1a;Cltc;Ap2s1;Ap2m1;Unc13a;Ap2a2;Atp6v0d1;Napa;Atp6v1h;Ap2a1;Slc17a7;Ap2b1;Stx1b;Dnm2
rno03050	Proteasome	http://www.kegg.jp/kegg-bin/show_pathway?rno03050+117262+287670+287772+287984+289990+29614+29669+29675+29676+29677+303353+307821+81827+83806	48	14	2.0799	6.73111	8.82356e-09	1.57437e-07	117262;287670;287772;287984;289990;29614;29669;29675;29676;29677;303353;307821;81827;83806	pathway_KEGG	Psma2;Psmd2;Psmc3;Psmb2;Psmd12;Psmc6;Psmd7;Psmd3;Psmb3;Psmc4;Psme2;Psmd11;Psmd1;Psmc5
GO:0048037	cofactor binding	http://amigo.geneontology.org/amigo/term/GO:0048037	440	47	19.0657	2.46516	1.03877e-08	1.8037e-07	24232;24248;24250;24380;24423;24426;24440;24788;25014;25035;25045;25104;25612;25721;25739;25750;26759;29382;29525;29611;50671;60666;63864;63938;64001;64313;79239;81805;94173;113965;114096;114515;157074;170670;171155;289217;298942;300036;300047;304805;306840;310378;361532;361596;361602;362454;362776	geneontology_Molecular_Function_noRedundant	Hebp1;Oat;Dbi;Sirt5;Ctbp1;Fasn;Cyb5a;Acat1;Glrx5;Hmox2;Gpd1;Me3;Dbt;Cyc1;Gstp1;Dld;Acot7;Sirt2;Asns;Pygb;Pc;Cbs;Sdha;Hadha;Sdhc;Idh3B;Idh2;Lancl1;Nnt;Gad2;Tsta3;Hbb;Hibadh;Hadh;Gstm1;Idh3a;Pitpna;Hadhb;Got2;Hsd17b10;C3;Cyb5r1;Cyb5r3;Suox;Cat;Sord;Maob
GO:0006790	sulfur compound metabolic process	http://amigo.geneontology.org/amigo/term/GO:0006790	212	30	9.18621	3.26577	1.04493e-08	1.8037e-07	24250;24423;24426;24439;24440;25014;25045;25274;25288;25604;26759;29328;50671;81530;81654;81805;113976;117243;170587;246302;288912;289950;293829;296849;298942;305177;499422;681913;100359982;108348148	geneontology_Biological_Process_noRedundant	Pcmt1;Dbi;Fasn;Acat1;Pdk2;Acsl1;Gstp1;Dld;Acot7;Pcyox1;Cbs;Acsl4;Acsl6;Gstt3;Mpc2;Enoph1;Gpx4;Hagh;Hbb;Gstm1;Dlat;Tst;Cs;Mri1;Pdhb;Gstm3;Gstz1;Mcee;Suox;Pdk3
rno04144	Endocytosis	http://www.kegg.jp/kegg-bin/show_pathway?rno04144+116563+117028+117103+117277+117550+140670+171381+192249+25479+25751+287709+288700+288779+291553+292640+297518+301511+306380+308578+311024+313409+314641+314764+404781+501083+54241+64310+64465+64516+65046+682507+79117+79434+81637+81824	275	35	11.9161	2.93721	1.05421e-08	1.8037e-07	116563;117028;117103;117277;117550;140670;171381;192249;25479;25751;287709;288700;288779;291553;292640;297518;301511;306380;308578;311024;313409;314641;314764;404781;501083;54241;64310;64465;64516;65046;682507;79117;79434;81637;81824	pathway_KEGG	Rab5c;Vta1;Bin1;Pdcd6ip;Arpc1a;Rab5b;Vps35;Kif5c;Wasl;Rab11b;Vps45;Arpc4;Arf5;Rab8a;Cltc;Ap2s1;Epn1;Ap2m1;Arpc2;Psd;Pip5k1c;Iqsec3;Eea1;Psd3;Dnajc6;Ap2a2;Arf1;Ehd3;Cdc42;Kif5b;Ap2a1;Ap2b1;Dnm2;Nedd4l;Rab35
GO:0003924	GTPase activity	http://amigo.geneontology.org/amigo/term/GO:0003924	237	32	10.2695	3.11603	1.08191e-08	1.82609e-07	24400;25686;25740;25751;29213;50664;56003;64465;79434;81664;83788;94197;114114;114117;117103;117515;171116;171337;171361;287606;287709;288700;288779;291006;293481;299027;299799;305227;306400;307039;362750;365355	geneontology_Molecular_Function_noRedundant	Rab5c;Dnm1l;Rab5b;Rap1b;Sept3;Atl1;Sept4;Gnaz;Sept11;Gnai2;Rab11b;Gnb1;Opa1;Rab8a;Diras2;Gnai1;Rras2;Tufm;Arhgap35;Cdc42;Sept9;Gnao1;Gng3;Sept2;Rab14;Rab21;Eif2s3;Dnm2;Rab18;Rab35;Eef1a1;Tubb4a
GO:0030139	endocytic vesicle	http://amigo.geneontology.org/amigo/term/GO:0030139	112	21	4.85309	4.32714	1.20545e-08	2.00748e-07	25291;25558;25751;54241;59267;65046;79434;83764;94197;116563;117103;117550;140670;171297;287709;288700;288779;290527;296654;308578;360840	geneontology_Cellular_Component_noRedundant	Rab5c;Flot2;Rab5b;Nlgn3;Stxbp1;Rab11b;Rab8a;Anxa11;Cltc;Ap2s1;Ap2m1;Syt7;Gsn;Srgap2;Kif5b;Ap2a1;Ap2b1;Anxa3;Rab14;Dnm2;Rab35
rno04728	Dopaminergic synapse	http://www.kegg.jp/kegg-bin/show_pathway?rno04728+114117+117281+117550+171140+24400+24654+24668+24672+24681+25023+25636+25686+25750+29253+293508+29627+311024+50663+50664+50686+80850+81664+83579	133	23	5.76304	3.99095	1.23072e-08	2.02259e-07	114117;117281;117550;171140;24400;24654;24668;24672;24681;25023;25636;25686;25750;29253;293508;29627;311024;50663;50664;50686;80850;81664;83579	pathway_KEGG	Plcb1;Ppp2r1a;Ppp1ca;Kif5c;Gnb5;Calm2;Prkcg;Gnai2;Gnb1;Prkaca;Ppp2ca;Prkacb;Gnai1;Prkcb;Gria2;Kif5b;Gnao1;Gng3;Gng2;Camk2g;Gsk3a;Maoa;Maob
GO:0005759	mitochondrial matrix	http://amigo.geneontology.org/amigo/term/GO:0005759	239	32	10.3561	3.08995	1.32956e-08	2.15665e-07	24399;24439;25014;25104;25274;25721;26956;29223;29611;29711;64313;79563;81530;81654;81743;94173;113965;114096;117099;170587;170670;171155;287069;289950;292845;293481;298942;303746;304542;306840;362440;362776	geneontology_Cellular_Component_noRedundant	Oat;Sirt5;Pde2a;Acat1;Glrx5;Pdk2;Trap1;Dbt;Dld;Pc;Hadha;Idh3B;Coq5;Glud1;Ak4;Tufm;Hagh;Hadh;Idh3a;Dlat;Hadhb;Mrpl12;Tst;Grpel1;Ndufa9;Ak3;Cs;Got2;Bdh1;Bckdhb;Pdhb;Etfb
GO:0031253	cell projection membrane	http://amigo.geneontology.org/amigo/term/GO:0031253	227	31	9.83617	3.15163	1.40104e-08	2.24346e-07	24400;24408;24832;25023;25604;25613;25751;29177;29423;29598;29647;54319;58823;64465;84390;114514;114764;117515;140729;171373;171381;191575;192249;288700;292597;292804;301252;310635;314641;362587;683788	geneontology_Cellular_Component_noRedundant	Atp2b1;Pcmt1;Clasp2;Macf1;Cask;Grin1;Gap43;Gnb1;Slc12a5;Nckap1;Hsp90ab1;Psd;Mapre1;Pip5k1c;Nme1;Prkcb;Hpca;Ehd3;Ttyh1;Fscn1;Cdc42;Cacng8;Ptprz1;Sept2;Hcn1;Ezr;Dnm2;Thy1;Rab35;Arhgef2;Gpi
GO:0044089	positive regulation of cellular component biogenesis	http://amigo.geneontology.org/amigo/term/GO:0044089	349	40	15.1226	2.64505	1.92089e-08	3.03695e-07	24832;25751;29167;29340;29489;29677;50646;56718;64030;64303;64310;64465;65178;81504;81661;81732;81824;81827;114764;116643;117152;117262;117277;171297;192269;287155;287931;289350;289820;289990;294568;296654;297518;306400;306439;308666;314442;360593;683788;684352	geneontology_Biological_Process_noRedundant	Rab3gap2;Arpc1a;Cand1;Ppm1e;Nlgn3;Prkce;Actr2;Dctn1;Actr3;Snap91;Pfn1;Dync1h1;Grb2;Ptk2b;Twf2;Arpc4;Psmc3;Psmc6;Cyfip1;Epn1;Mapre1;Gsn;Gpm6a;Kit;Sub1;Gmfb;Psmc4;Arf1;Arhgap35;Fscn1;Cdc42;Stub1;Wars;Ppm1f;Wasf1;Psmc5;Dnm2;Vcp;Thy1;Mtor
GO:0044306	neuron projection terminus	http://amigo.geneontology.org/amigo/term/GO:0044306	185	27	8.01627	3.36815	2.94603e-08	4.59949e-07	24213;24408;24681;25558;25639;25673;29495;29521;29545;29627;54241;59267;64829;65178;81672;84390;85238;116563;117028;117277;117282;117556;140673;291969;308666;314633;687090	geneontology_Cellular_Component_noRedundant	Bin1;Fkbp1a;Snap91;Stxbp1;Prkcg;Grin1;Uchl1;Anxa5;Grm7;Cltc;Tprg1l;Synj1;Cyfip1;Epn1;Ap2m1;Unc13a;Syt7;Sv2b;Hnrnpk;Atp6v0d1;Napa;Gria2;Ap3d1;Atp1a3;Scamp1;Dlg4;Hcn1
GO:0015631	tubulin binding	http://amigo.geneontology.org/amigo/term/GO:0015631	235	31	10.1828	3.04434	3.18819e-08	4.9161e-07	24392;24686;25150;25152;25595;25751;29167;54319;60431;64862;65179;65201;65208;83572;114114;114514;114705;114764;117550;171116;191575;289400;290640;294864;298848;310635;313867;362587;363288;500282;100361417	geneontology_Molecular_Function_noRedundant	Dnm1l;Clasp2;Macf1;Dctn1;Dpysl5;Ppp5c;Opa1;Fyn;Cct5;Tbcd;Mapre1;Prnp;Gja1;Nme1;Arl8b;Vapb;Rgs14;Lrpprc;Map1a;Kif1a;Kif5b;Clip1;Map2;Map1s;Ezr;Mapre3;Dnm2;Map1lc3b;Camsap2;Pafah1b1;Arhgef2
GO:0005905	clathrin-coated pit	http://amigo.geneontology.org/amigo/term/GO:0005905	45	13	1.9499	6.667	3.42262e-08	5.21324e-07	25751;54241;65046;65178;85238;89816;114114;116563;117277;140670;288700;308578;312694	geneontology_Cellular_Component_noRedundant	Dnm1l;Picalm;Snap91;Cltc;Ap2s1;Synj1;Epn1;Ap2m1;Ap2a1;Ap2b1;Necap1;Dnm2;Rab35
GO:0030865	cortical cytoskeleton organization	http://amigo.geneontology.org/amigo/term/GO:0030865	31	11	1.34327	8.189	3.56834e-08	5.36971e-07	25252;54319;58823;64202;83572;116724;140908;309557;313494;360950;501083	geneontology_Biological_Process_noRedundant	Pdcd6ip;Epb41l3;Nckap1;Wdr1;Epb41l2;Calr;Dlg1;Ezr;Cdk5;Tln1;Pafah1b1
GO:0042063	gliogenesis	http://amigo.geneontology.org/amigo/term/GO:0042063	225	30	9.74951	3.07708	4.16582e-08	6.19418e-07	24408;24426;25045;25275;25613;25728;25742;29409;29423;50646;56718;58920;81732;83572;83765;84008;85238;114559;116590;116654;117028;140908;246216;296654;299858;360840;360950;361532;361596;362361	geneontology_Biological_Process_noRedundant	Bin1;S100b;Rtn4;Dbi;Actr3;Hnrnpa2b1;Grin1;Gap43;Ptk2b;Lrp1;Gstp1;Synj1;Apoe;Sirt2;Wdr1;Prpf19;Gsn;Idh2;Mag;Arhgef7;Srgap2;Gpc1;Mapk1;Cnp;Ptprz1;Exoc4;Cdk5;Cntnap1;Mtor;Pafah1b1
rno05016	Huntington disease	http://www.kegg.jp/kegg-bin/show_pathway?rno05016+116563+140670+157074+24408+24418+24654+25282+25488+289217+29167+293991+29424+29495+295923+299739+299850+300047+301123+308578+315167+361385+362440+54241+65046+681418+81637+83532+94194	202	28	8.7529	3.19894	5.092e-08	7.48224e-07	116563;140670;157074;24408;24418;24654;25282;25488;289217;29167;293991;29424;29495;295923;299739;299850;300047;301123;308578;315167;361385;362440;54241;65046;681418;81637;83532;94194	pathway_KEGG	Plcb1;Ndufa6;Dctn1;Grin1;Ndufa11;Cyc1;Cltc;Ap2s1;Htt;Ap2m1;Sdha;Sdhc;Ndufb8;Ndufa5;Ap2a2;Dctn2;Dlg4;Cox6a1;Ndufa9;Ap2a1;Cox5b;Grm5;Ap2b1;Ndufa12;Ndufb7;Ndufs3;Vdac3;Ndufb10
rno00620	Pyruvate metabolism	http://www.kegg.jp/kegg-bin/show_pathway?rno00620+24368+24439+24552+25014+25104+25630+289950+298942+361042+361602+65183+81654	39	12	1.68992	7.10095	5.28972e-08	7.68239e-07	24368;24439;24552;25014;25104;25630;289950;298942;361042;361602;65183;81654	pathway_KEGG	Pck2;Acat1;Pkm;Fh;Me3;Dld;Me1;Pc;Aldh3a2;Hagh;Dlat;Pdhb
GO:0010038	response to metal ion	http://amigo.geneontology.org/amigo/term/GO:0010038	379	41	16.4225	2.49657	6.52591e-08	9.3688e-07	24232;24248;24366;24399;24408;24423;24586;24668;24686;24788;25183;25639;25673;25728;25750;29177;29627;50646;50686;59267;64001;64030;64202;65179;65248;79256;84390;116590;117099;117287;266777;290527;292804;296654;313231;317385;360739;361433;361991;362013;367160	geneontology_Biological_Process_noRedundant	Ppp1ca;Cpne7;Fkbp1a;Cyb5a;Ncam1;Grin1;Park7;Ranbp1;Anxa5;Ptk2b;Ppp5c;Anxa11;Apoe;Syt7;Prnp;Gsn;Fus;Kit;Glud1;S100a16;Hpca;Ahcyl1;Hnrnpd;Gria2;Nptx1;Calr;Gstm1;Mapk1;Hcn1;Alg2;Bdh1;Gdi1;Fgb;C3;Cpne4;Prkaa1;Cat;Gsk3a;Sord;Maob;Gpi
GO:0051259	protein complex oligomerization	http://amigo.geneontology.org/amigo/term/GO:0051259	439	45	19.0224	2.36563	7.38047e-08	1.04752e-06	24248;24392;24398;24400;24408;24440;24686;25014;25479;25498;25630;25673;25741;26956;29482;29627;29738;60416;63864;64313;65152;65179;65180;65248;81504;81655;81800;83782;84390;84599;114114;116643;170821;170851;171116;171361;192249;192269;291245;294560;301544;305227;315150;315215;362750	geneontology_Biological_Process_noRedundant	Pfkl;Dnm1l;Vps35;Actn2;Oat;Atl1;Grin1;Acat1;Sept11;Pkm;Grb2;Atxn10;Anxa5;Pfkm;Gnb1;Ppp5c;Opa1;Prnp;Gja1;Kcnd2;Sub1;Kcnab2;Map2k1;Pfkp;Nme2;Gria2;Adsl;Slc1a2;Ehd3;Hbb;Mcu;Farsb;Hcn1;Ak3;Hsd17b10;Gls;Vcp;Mlc1;Npm1;Dync1li2;Prkaa1;Cat;Eef1a1;St13;Tmed10
GO:0016050	vesicle organization	http://amigo.geneontology.org/amigo/term/GO:0016050	194	27	8.40625	3.2119	8.09883e-08	1.13657e-06	24923;25558;25751;29495;56042;58817;59267;60431;64060;64310;64829;65033;83572;84599;85238;89816;93646;94197;116638;117103;117550;288779;295461;301555;306332;310710;314633	geneontology_Biological_Process_noRedundant	Rab5b;Picalm;Stxbp1;Uso1;Rab8a;Synj1;Unc13a;Sec23a;Sec22b;Sec31a;Syt7;Stx12;Vapb;Ap1m1;Arf1;Ap3d1;Kif5b;Dlg4;Cul3;Slc17a7;Rab14;Stx1b;Dnm2;Sec24b;Vps33b;Pafah1b1;Tmed10
GO:1905368	peptidase complex	http://amigo.geneontology.org/amigo/term/GO:1905368	75	16	3.24984	4.92332	1.01489e-07	1.40844e-06	29614;29669;29675;29676;29677;81827;83806;116643;117262;287670;287772;287984;289990;296651;298012;307821	geneontology_Cellular_Component_noRedundant	Psma2;Psmd2;Psmc3;Psmb2;Psmd12;Psmd5;Psmc6;Rad23b;Psmd7;Psmd3;Psmb3;Psmc4;Psme2;Psmd1;Psmc5;Vcp
GO:0051129	negative regulation of cellular component organization	http://amigo.geneontology.org/amigo/term/GO:0051129	491	48	21.2756	2.25611	1.15664e-07	1.58666e-06	24686;24832;24923;25150;25152;25183;25230;25479;25528;25529;25558;25595;25613;25725;25751;29213;29384;29409;29495;50686;50864;63836;64159;64465;79215;81653;81661;81732;81814;83572;83765;114114;114514;114764;140908;171116;287721;289400;293705;296654;299858;310533;310635;310710;360921;497198;684352;100361417	geneontology_Biological_Process_noRedundant	Dnm1l;Sirpa;Clasp2;Add3;Vps35;Rtn4;Impact;Actr3;Sptan1;Stxbp1;Mtpn;Prkar1a;Tmsb4x;Twf2;Opa1;Lrp1;Fyn;Rufy3;Dbn1;Tbcd;Sec22b;Mapre1;Prnp;Rapgef2;Gsn;H2afy;Mag;Ntm;Gmfb;Actn4;Ptprs;Map1a;Cdc42;Map2;Dlg4;Ptprz1;Vat1;Gdi1;Cdk5;Stx1b;Dnm2;Otub1;Thy1;Camsap2;Gsk3a;Pafah1b1;Arhgef2;Tubb4a
GO:0070201	regulation of establishment of protein localization	http://amigo.geneontology.org/amigo/term/GO:0070201	476	47	20.6256	2.27872	1.16872e-07	1.58666e-06	24366;24392;24399;24686;25150;25183;25479;25673;25741;29167;29177;29647;29753;54319;56029;59267;64310;64465;65178;65248;81732;81743;85252;89816;113965;114114;116590;116654;117103;117287;117550;140908;287931;288620;292804;294560;294864;299809;299858;300666;301252;304859;306182;360921;361596;361967;100359982	geneontology_Biological_Process_noRedundant	Pfkl;Dnm1l;Vps35;Picalm;Cct2;Cask;Dctn1;Pde2a;Actr3;Snap91;Park7;Cct6a;Ywhae;Anxa5;Rab8a;Lrp1;Fyn;Rufy3;Hsp90ab1;Xpo1;Ppid;Cct5;Syt7;Prnp;Gja1;Idh2;Dhx9;Glud1;Hpca;C2cd2l;Arf1;Mpc2;Cdc42;Kif5b;Hadh;Mapk1;Mcu;Ppm1f;Srcin1;Ezr;Exoc4;Gdi1;Fgb;Cdk5;Prkaa1;Ipo5;Gpi
rno01230	Biosynthesis of amino acids	http://www.kegg.jp/kegg-bin/show_pathway?rno01230+114096+170587+24250+24642+25104+25179+25612+25630+25721+25741+29562+29592+361596+361755+60416+65152+94173	86	17	3.72648	4.56195	1.32576e-07	1.7805e-06	114096;170587;24250;24642;25104;25179;25612;25630;25721;25741;29562;29592;361596;361755;60416;65152;94173	pathway_KEGG	Pfkl;Bcat1;Pkm;Pfkm;Pgam1;Asns;Prps1;Pc;Cbs;Idh3B;Idh2;Aldh18a1;Pfkp;Idh3g;Idh3a;Cs;Got2
GO:0016614	oxidoreductase activity, acting on CH-OH group of donors	http://amigo.geneontology.org/amigo/term/GO:0016614	118	20	5.11308	3.91154	1.54655e-07	2.05494e-06	24192;24788;25062;29382;29738;50671;60666;63864;63938;79244;94173;113965;114096;117099;170670;171155;171445;300036;361596;361602	geneontology_Molecular_Function_noRedundant	Gpd2;Ctbp1;Fasn;Gpd1;Me3;Hadha;Idh3B;Kcnab2;Idh2;Tsta3;Hibadh;Akr1b1;Hadh;Idh3a;Hadhb;Akr7a2;Hsd17b4;Hsd17b10;Bdh1;Sord
rno05012	Parkinson disease	http://www.kegg.jp/kegg-bin/show_pathway?rno05012+116728+117287+157074+25282+25488+25636+25686+289217+293508+293991+29545+295923+299739+300047+301123+314432+315167+361385+362440+681418+81664+83532+94194	152	23	6.58634	3.49208	1.59455e-07	2.09641e-06	116728;117287;157074;25282;25488;25636;25686;289217;293508;293991;29545;295923;299739;300047;301123;314432;315167;361385;362440;681418;81664;83532;94194	pathway_KEGG	Sept5;Ndufa6;Uchl1;Park7;Gnai2;Prkaca;Ndufa11;Cyc1;Sdha;Sdhc;Prkacb;Ndufb8;Gnai1;Ndufa5;Uba1;Cox6a1;Ndufa9;Cox5b;Ndufa12;Ndufb7;Ndufs3;Vdac3;Ndufb10
GO:0061024	membrane organization	http://amigo.geneontology.org/amigo/term/GO:0061024	438	44	18.9791	2.31835	1.84077e-07	2.39492e-06	24923;25275;25479;25558;25751;29167;29382;29411;29495;50686;56042;58817;59267;60431;64053;64310;64351;64465;65033;81653;83572;83764;83765;83809;84599;93646;114114;117103;117550;140673;140729;171116;171297;291709;295461;296654;300111;301555;303222;310710;314633;317191;362750;502749	geneontology_Biological_Process_noRedundant	Dlg2;Dnm1l;Ppt1;Flot2;Nlgn3;Vps35;Rtn4;Ctbp1;Dctn1;Atl1;Stxbp1;Uso1;Opa1;Rab8a;Dbn1;Sec23a;Sec22b;Sec31a;Syt7;Stx12;Samm50;Gsn;Arhgap44;Vapb;Agk;Napa;Ykt6;Arf1;Ap3d1;Cdc42;Cacng8;Kif5b;Cnp;Dlg4;Cul3;Slc25a46;Apool;Nsfl1c;Stx1b;Dnm2;Sec24b;Gsk3a;Pafah1b1;Tmed10
GO:0035418	protein localization to synapse	http://amigo.geneontology.org/amigo/term/GO:0035418	60	14	2.59987	5.38488	1.95876e-07	2.52216e-06	24923;25252;25479;29495;29546;65040;84009;117103;117550;140908;170851;171297;266777;303222	geneontology_Biological_Process_noRedundant	Nlgn3;Vps35;Dlgap1;Homer1;Rab8a;Arhgap44;Map2k1;Nptx1;Kalrn;Kif5b;Dlg1;Dlg4;Cdk5;Stx1b
rno04713	Circadian entrainment	http://www.kegg.jp/kegg-bin/show_pathway?rno04713+114117+116590+171140+24400+24408+24654+24681+25023+25636+25686+293508+29627+302950+50663+50664+80850+81664+83579	99	18	4.28979	4.19601	2.16223e-07	2.75574e-06	114117;116590;171140;24400;24408;24654;24681;25023;25636;25686;293508;29627;302950;50663;50664;80850;81664;83579	pathway_KEGG	Plcb1;Gnb5;Calm2;Prkcg;Grin1;Gnai2;Gnb1;Prkaca;Prkacb;Gnai1;Prkcb;Gria2;Adcy9;Gnao1;Mapk1;Gng3;Gng2;Camk2g
GO:0071417	cellular response to organonitrogen compound	http://amigo.geneontology.org/amigo/term/GO:0071417	488	47	21.1456	2.22268	2.44446e-07	3.08397e-06	24192;24213;24426;24654;24686;25023;25150;25630;25673;25751;29154;29489;29715;50686;54245;54319;56718;60666;65248;79256;81504;81530;81664;81732;81743;84390;116590;117103;117243;117282;140908;140931;171116;171337;192213;289820;291245;291624;299858;306182;306243;308666;310533;310635;361532;362013;497198	geneontology_Biological_Process_noRedundant	Plcb1;Cacna2d3;Actn2;Rap1b;Impact;Actr2;Pde2a;Actr3;Dync1h1;Lars;Pdk2;Pkm;Gnai2;Grb2;Anxa5;Gpd1;Opa1;Rab8a;Lrp1;Fyn;Gstp1;Cyfip1;Hnrnph1;Sirt2;Capn2;Prnp;Rapgef2;Acsl6;Prkcb;Hnrnpk;Ahcyl1;Hnrnpd;Slc8a1;Atp1a3;Crk;Akr1b1;Mapk1;Hcn1;Ezr;Cdk5;Dnm2;Prkaa1;Mtor;Rasgrf1;Gsk3a;Arhgef2;Ipo5
rno04727	GABAergic synapse	http://www.kegg.jp/kegg-bin/show_pathway?rno04727+114117+171373+24380+24398+24400+24681+25023+25636+25686+293508+302950+50664+64670+80850+81664+83579+83633	91	17	3.94314	4.31129	3.12604e-07	3.90442e-06	114117;171373;24380;24398;24400;24681;25023;25636;25686;293508;302950;50664;64670;80850;81664;83579;83633	pathway_KEGG	Gnb5;Prkcg;Gnai2;Gnb1;Prkaca;Slc12a5;Prkacb;Gnai1;Prkcb;Gabarapl2;Gad2;Adcy9;Gnao1;Gng3;Gng2;Gls;Gabbr2
rno04530	Tight junction	http://www.kegg.jp/kegg-bin/show_pathway?rno04530+117103+117281+24672+25252+25537+25636+266759+289820+291553+29340+293508+310533+310635+362298+54319+58948+63836+64053+64465+65248+682507+79433+81634+81732	170	24	7.3663	3.25808	3.24395e-07	4.01157e-06	117103;117281;24672;25252;25537;25636;266759;289820;291553;29340;293508;310533;310635;362298;54319;58948;63836;64053;64465;65248;682507;79433;81634;81732	pathway_KEGG	Dlg2;Ppp2r1a;Dlg3;Prkce;Actr2;Actr3;Myh10;Actn1;Wasl;Actr3b;Prkaca;Rab8a;Ppp2ca;Hspa4;Rapgef2;Prkacb;Rock2;Actn4;Cdc42;Dlg1;Ezr;Prkaa1;Nedd4l;Arhgef2
GO:0043198	dendritic shaft	http://amigo.geneontology.org/amigo/term/GO:0043198	54	13	2.33988	5.55583	3.62355e-07	4.42056e-06	24418;25152;25595;29482;29546;29627;29715;58948;81653;81672;84390;116654;310635	geneontology_Cellular_Component_noRedundant	Dlg3;Homer1;Grm7;Dbn1;Map1a;Slc8a1;Gria2;Slc1a2;Map2;Hcn1;Exoc4;Grm5;Arhgef2
GO:0019901	protein kinase binding	http://amigo.geneontology.org/amigo/term/GO:0019901	464	45	20.1057	2.23818	3.64546e-07	4.42056e-06	24392;24418;24423;24426;24832;24923;25230;25252;25498;25528;25558;25595;25673;25725;25751;29340;29384;29409;29495;29627;50646;50686;54245;54319;56029;56718;64465;81504;114559;114705;114764;116590;117103;117550;140908;170851;192213;286993;287069;298848;301252;308578;310533;314442;684352	geneontology_Molecular_Function_noRedundant	Sirpa;Add3;Prkce;Stxbp1;Grb2;Trap1;Prkar1a;Anxa5;Ptk2b;Twf2;Rab8a;Hsp90ab1;Gstp1;Mapre1;Gja1;Rapgef2;Taok1;H2afy;Mag;Arhgef7;Map2k1;Rgs14;Gria2;Crk;Cdc42;Kif5b;Dlg1;Gstm1;Wars;Mapk1;Map2;Dlg4;Srcin1;Ezr;Ap2a1;Grm5;Mapre3;Cdk5;Stx1b;Dnm2;Thy1;Npm1;Mtor;Rasgrf1;Gsk3a
GO:0019866	organelle inner membrane	http://amigo.geneontology.org/amigo/term/GO:0019866	318	35	13.7793	2.54004	4.0098e-07	4.81562e-06	25275;25282;25488;25721;29483;64201;79563;81743;94194;114766;117099;117287;157074;171116;171155;287069;289217;293991;294560;295923;299739;300047;301123;304542;306840;312444;313867;315167;317191;361385;362440;498909;502749;681418;100359982	geneontology_Cellular_Component_noRedundant	Ndufa6;Coq9;Sirt5;Pde2a;Park7;Trap1;Opa1;Ndufa11;Cyc1;Sdha;Sdhc;Ndufb8;Ndufa5;Coq5;Slc25a11;Agk;Lrpprc;Mpc2;Immt;Mcu;Hadhb;Slc1a3;Cnp;Grpel1;Cox6a1;Ndufa9;Cox5b;Got2;Apool;Bdh1;Phb2;Ndufa12;Ndufb7;Ndufs3;Ndufb10
GO:0098798	mitochondrial protein complex	http://amigo.geneontology.org/amigo/term/GO:0098798	223	28	9.66285	2.8977	4.16847e-07	4.95849e-06	25282;25488;29711;63864;79563;81530;94173;94194;114096;117287;157074;170670;171155;288150;289217;293991;294560;295923;299739;300047;300111;301123;303746;317191;361385;362440;502749;681418	geneontology_Cellular_Component_noRedundant	Park7;Mtx2;Pdk2;Ndufa11;Cyc1;Sdha;Hadha;Sdhc;Samm50;Ndufb8;Idh3B;Ndufa5;Agk;Idh3a;Mcu;Hadhb;Mrpl12;Grpel1;Cox6a1;Ndufa9;Cox5b;Hsd17b10;Apool;Bckdhb;Ndufa12;Ndufb7;Ndufs3;Ndufb10
rno05010	Alzheimer disease	http://www.kegg.jp/kegg-bin/show_pathway?rno05010+116590+140908+140945+157074+24408+24654+25282+25488+25728+289217+29154+293991+295923+299739+299858+300047+301123+315167+361385+362440+50663+63864+681418+83765+94194	185	25	8.01627	3.11866	4.3205e-07	5.09086e-06	116590;140908;140945;157074;24408;24654;25282;25488;25728;289217;29154;293991;295923;299739;299858;300047;301123;315167;361385;362440;50663;63864;681418;83765;94194	pathway_KEGG	Plcb1;Ndufa6;Rtn4;Calm2;Grin1;Ndufa11;Lrp1;Cyc1;Apoe;Capn2;Sdha;Sdhc;Ndufb8;Ndufa5;Mapk1;Cox6a1;Ndufa9;Cox5b;Hsd17b10;Cdk5;Ndufa12;Ndufb7;Ndufs3;Ndufb10;Rtn3
GO:0032787	monocarboxylic acid metabolic process	http://amigo.geneontology.org/amigo/term/GO:0032787	422	42	18.2858	2.29687	4.51913e-07	5.27513e-06	24232;24426;24439;24642;25014;25045;25104;25288;25612;25630;25741;26759;29254;50671;56718;60416;60666;64030;65152;65183;65248;79244;81530;81654;83510;113965;113976;116645;117243;117287;170670;171155;289950;292804;292845;296849;298942;309207;361596;361602;362809;100359982	geneontology_Biological_Process_noRedundant	Pfkl;Dbi;Mgll;Fasn;Park7;Acat1;Pdk2;Pkm;Pfkm;Gpd1;Acsl1;Pgam1;Me3;Gstp1;Dld;Acot7;Asns;Pc;Hadha;Kit;Acsl4;Plaa;Aldh3a2;Idh2;Acsl6;Pfkp;Mpc2;Hagh;Hadh;Dlat;Hadhb;Hsd17b4;Pdhb;C3;Etfb;Lypla2;Prkaa1;Mtor;Pdk3;Dagla;Ptges3;Gpi
GO:0090407	organophosphate biosynthetic process	http://amigo.geneontology.org/amigo/term/GO:0090407	408	41	17.6791	2.31912	4.81481e-07	5.56824e-06	24642;25014;25104;25288;25630;25741;26759;26956;29154;29177;29223;29562;50646;60416;60666;65152;65248;80849;81530;81654;83782;89841;94194;113976;116590;116643;117243;117272;170851;171053;191575;289950;292804;296849;298942;300047;302950;303179;315150;361596;100359982	geneontology_Biological_Process_noRedundant	Pfkl;Acat1;Prpsap2;Pdk2;Pkm;Pfkm;Ptk2b;Gpd1;Acsl1;Pgam1;Cyc1;Dld;Pank4;Acot7;Capn2;Prps1;Pc;Nme1;Acsl4;Idh2;Acsl6;Guk1;Map2k1;Inpp4a;Pfkp;Hpca;Ak4;Nme2;Adsl;Mpc2;Adcy9;Mapk1;Pcyt2;Dlat;Cox5b;Ak3;Pdhb;Vcp;Prkaa1;Pdk3;Gpi
GO:0019898	extrinsic component of membrane	http://amigo.geneontology.org/amigo/term/GO:0019898	238	29	10.3128	2.81203	4.91285e-07	5.62949e-06	24400;25150;25639;25686;25728;25740;26989;29177;29254;29495;29738;50646;50664;54241;54319;58817;60450;65178;65183;81022;81664;83579;89816;114117;117028;117277;171116;289992;304542	geneontology_Cellular_Component_noRedundant	Stxbp5;Bin1;Picalm;Mgll;Gnb5;Fkbp1a;Snap91;Cadps;Gnaz;Gnai2;Ptk2b;Gnb1;Opa1;Fyn;Cltc;Epn1;Apoe;Sec23a;Gnai1;Aldh3a2;Kcnab2;Coq5;Hpca;Fermt2;Gnao1;Gng3;Dlg4;Ezr;Matk
rno00280	Valine, leucine and isoleucine degradation	http://www.kegg.jp/kegg-bin/show_pathway?rno00280+113965+140547+170670+171155+25014+293829+29592+29611+29711+298942+63864+63938+65183	56	13	2.42655	5.35741	5.70471e-07	6.47744e-06	113965;140547;170670;171155;25014;293829;29592;29611;29711;298942;63864;63938;65183	pathway_KEGG	Acat1;Bcat1;Dbt;Dld;Hadha;Aldh3a2;Hibadh;Echs1;Hadh;Hadhb;Hsd17b10;Bckdhb;Mcee
GO:1990778	protein localization to cell periphery	http://amigo.geneontology.org/amigo/term/GO:1990778	228	28	9.87951	2.83415	6.58134e-07	7.40549e-06	24686;24923;25252;25479;25558;25686;29272;29647;54319;58817;60627;81732;83764;84009;116549;117103;117550;140908;170851;171140;266777;291245;299858;303222;309557;313928;316415;362587	geneontology_Biological_Process_noRedundant	Flot2;Macf1;Vps35;Actn2;Cask;Fam126b;Actr3;Stxbp1;Rab8a;Lrp1;Sec23a;Csnk2a1;Prnp;Arhgap44;Gnai1;Map2k1;Epb41l2;Nptx1;Kalrn;Kif5b;Exoc5;Dlg1;Dpp6;Efr3b;Ezr;Cdk5;Stx1b;Camk2g
GO:0048193	Golgi vesicle transport	http://amigo.geneontology.org/amigo/term/GO:0048193	202	26	8.7529	2.97045	6.65578e-07	7.42238e-06	25751;56042;58817;60431;60627;64310;64351;79117;84599;93646;94197;116643;116654;117103;171455;290659;291750;295461;300674;301555;304978;309678;310710;314633;317381;362587	geneontology_Biological_Process_noRedundant	Macf1;Exoc2;Uso1;Copa;Arf5;Rab8a;Sec23a;Trappc8;Sec22b;Sec31a;Vapb;Ccdc22;Ykt6;Arf1;Ap3d1;Exoc5;Arcn1;Cul3;Trappc10;Exoc4;Cope;Rab14;Dnm2;Sec24b;Vcp;Tmed10
rno04720	Long-term potentiation	http://www.kegg.jp/kegg-bin/show_pathway?rno04720+116590+170851+171140+171337+24408+24418+24654+24668+24681+25023+25636+293508+29627+50663	66	14	2.85986	4.89535	6.87072e-07	7.59428e-06	116590;170851;171140;171337;24408;24418;24654;24668;24681;25023;25636;293508;29627;50663	pathway_KEGG	Plcb1;Ppp1ca;Rap1b;Calm2;Prkcg;Grin1;Prkaca;Prkacb;Prkcb;Map2k1;Gria2;Mapk1;Grm5;Camk2g
GO:0005516	calmodulin binding	http://amigo.geneontology.org/amigo/term/GO:0005516	130	20	5.63305	3.55047	7.77836e-07	8.52208e-06	24215;24418;24654;25230;25595;29149;29423;29598;29647;29715;59267;64159;64160;64829;79011;79433;81672;171140;289400;313658	geneontology_Molecular_Function_noRedundant	Plcb1;Atp2b1;Add3;Cask;Sptan1;Basp1;Gap43;Myh10;Atp2b2;Grm7;Unc13a;Syt7;Strn;Ubr4;Slc8a1;Map2;Grm5;Camk2g;Camsap2;Camkv
GO:0098858	actin-based cell projection	http://amigo.geneontology.org/amigo/term/GO:0098858	144	21	6.23969	3.36555	1.02406e-06	1.11222e-05	24192;25252;25275;25595;25613;29423;54319;56029;64465;81653;83572;140908;291245;292597;306439;308578;308666;360921;683788;684352;685232	geneontology_Cellular_Component_noRedundant	Actn2;Gap43;Atp6v1a;Twf2;Rufy3;Dbn1;Cyfip1;Gpm6a;Ttyh1;Fscn1;Cdc42;Akr1b1;Dlg1;Map2;Cnp;Ptprz1;Srcin1;Ezr;Ap2a1;Cdk5;Pafah1b1
rno04810	Regulation of actin cytoskeleton	http://www.kegg.jp/kegg-bin/show_pathway?rno04810+114559+116590+170851+24668+25537+294568+296654+297518+301511+303073+306400+307483+308666+314641+360891+365355+54245+54319+58823+63836+64303+64465+682507+79433+81634+81814+81824	220	27	9.53286	2.83231	1.05385e-06	1.13471e-05	114559;116590;170851;24668;25537;294568;296654;297518;301511;303073;306400;307483;308666;314641;360891;365355;54245;54319;58823;63836;64303;64465;682507;79433;81634;81814;81824	pathway_KEGG	Arpc1a;Ppp1ca;Enah;Pfn1;Myh10;Actn1;Wasl;Tmsb4x;Arpc4;Nckap1;Cyfip1;Arpc2;Pip5k1c;Gsn;Arhgef7;Rock2;Map2k1;Actn4;Rras2;Arhgap35;Crk;Cdc42;Cyfip2;Mapk1;Wasf1;Ezr;Diaph1
GO:0007017	microtubule-based process	http://amigo.geneontology.org/amigo/term/GO:0007017	499	46	21.6223	2.12744	1.13393e-06	1.21049e-05	24392;25152;25275;25498;25537;25595;25686;29167;29213;29489;29545;54319;60328;64465;65248;81655;83572;83764;83809;85252;114514;114705;114764;116643;117281;117550;140667;170714;170851;286993;289400;289820;290640;294568;298848;299799;299850;308777;310635;310698;314633;360739;360840;362587;363288;100361417	geneontology_Biological_Process_noRedundant	Ppp2r1a;Flot2;Clasp2;Macf1;Actr2;Dctn1;Ap3b2;Dync1h1;Uchl1;Ranbp1;Mark2;Ap3m2;Dynlrb1;Xpo1;Tbcd;Mapre1;Gja1;Taok1;Gnai1;Rock2;Map2k1;Rgs14;Srgap2;Dclk2;Map1a;Kif1a;Ap3d1;Cdc42;Kif5b;Dctn2;Map2;Wasf1;Cnp;Map1s;Ezr;Mapre3;Nsfl1c;Rab21;Vcp;Npm1;Dync1li2;Prkaa1;Camsap2;Pafah1b1;Arhgef2;Tubb4a
rno04666	Fc gamma R-mediated phagocytosis	http://www.kegg.jp/kegg-bin/show_pathway?rno04666+116590+117028+170851+24681+25023+25751+29340+294568+296654+297518+301511+314641+54245+64465+682507+81824	89	16	3.85647	4.14887	1.19054e-06	1.26015e-05	116590;117028;170851;24681;25023;25751;29340;294568;296654;297518;301511;314641;54245;64465;682507;81824	pathway_KEGG	Bin1;Arpc1a;Prkce;Prkcg;Wasl;Arpc4;Arpc2;Pip5k1c;Gsn;Prkcb;Map2k1;Crk;Cdc42;Mapk1;Wasf1;Dnm2
GO:0016999	antibiotic metabolic process	http://amigo.geneontology.org/amigo/term/GO:0016999	111	18	4.80976	3.74239	1.25857e-06	1.32097e-05	24192;24248;24440;25150;29338;65183;81654;94167;94173;114096;117287;157074;170587;289217;289950;290401;310378;361596	geneontology_Biological_Process_noRedundant	Prdx2;Park7;Fyn;Sdha;Sdhc;Aldh3a2;Idh3B;Idh2;Nnt;Esd;Hbb;Akr1b1;Idh3a;Prdx6;Dlat;Cs;Pdhb;Cat
GO:0070469	respiratory chain	http://amigo.geneontology.org/amigo/term/GO:0070469	81	15	3.50982	4.27372	1.7333e-06	1.80408e-05	25282;25488;94194;117287;157074;289217;293991;295923;299739;300047;301123;315167;361385;362440;681418	geneontology_Cellular_Component_noRedundant	Ndufa6;Park7;Ndufa11;Cyc1;Sdha;Sdhc;Ndufb8;Ndufa5;Cox6a1;Ndufa9;Cox5b;Ndufa12;Ndufb7;Ndufs3;Ndufb10
GO:0043648	dicarboxylic acid metabolic process	http://amigo.geneontology.org/amigo/term/GO:0043648	82	15	3.55316	4.2216	2.03776e-06	2.10344e-05	24380;24398;24399;25104;25721;64313;64392;94173;114096;157074;170587;298942;361472;361596;361602	geneontology_Biological_Process_noRedundant	Oat;Me3;Dld;Pc;Sdha;Idh3B;Idh2;Glud1;Aldh1l1;Gad2;Idh3a;Mthfd1l;Cs;Got2;Gls
GO:0022406	membrane docking	http://amigo.geneontology.org/amigo/term/GO:0022406	63	13	2.72986	4.76214	2.38902e-06	2.44581e-05	24923;25558;54319;56042;60627;64060;64351;64516;64829;65033;116654;117103;171455	geneontology_Biological_Process_noRedundant	Exoc2;Stxbp1;Uso1;Vps45;Rab8a;Unc13a;Stx12;Ykt6;Exoc5;Ezr;Exoc4;Stx1b;Vps33b
GO:0035254	glutamate receptor binding	http://amigo.geneontology.org/amigo/term/GO:0035254	54	12	2.33988	5.12846	2.55332e-06	2.59276e-05	24215;24408;24686;25150;25252;29495;29546;58948;64053;83764;140729;317385	geneontology_Molecular_Function_noRedundant	Dlg2;Flot2;Dlg3;Homer1;Grin1;Atp2b2;Fyn;Prnp;Fus;Cacng8;Dlg1;Dlg4
GO:0044282	small molecule catabolic process	http://amigo.geneontology.org/amigo/term/GO:0044282	258	29	11.1794	2.59405	2.59539e-06	2.61423e-05	24250;24380;24398;24399;24439;24788;25014;25045;25062;25721;25728;25741;26759;29711;56718;60416;63938;64313;64392;65152;79244;85238;113965;170670;171155;246302;290401;292845;681913	geneontology_Biological_Process_noRedundant	Pfkl;Gpd2;Oat;Dbi;Acat1;Pfkm;Synj1;Apoe;Acot7;Pcyox1;Cbs;Hadha;Glud1;Aldh1l1;Pfkp;Gad2;Esd;Hagh;Hibadh;Hadh;Hadhb;Hsd17b4;Got2;Bckdhb;Gls;Etfb;Gstz1;Mtor;Sord
GO:0044283	small molecule biosynthetic process	http://amigo.geneontology.org/amigo/term/GO:0044283	487	44	21.1023	2.08508	3.30441e-06	3.30177e-05	24192;24250;24398;24642;24788;25014;25035;25104;25275;25612;25630;25721;25728;25741;26759;29254;29592;50646;50671;54241;60416;60666;64313;64392;65152;65248;81530;81743;83782;116643;117287;191575;288912;292804;303179;304542;305177;306840;308578;311422;361472;362440;362809;498909	geneontology_Biological_Process_noRedundant	Pfkl;Coq9;Oat;Sirt5;Mgll;Fasn;Pde2a;Park7;Acat1;Bcat1;Pdk2;Pkm;Pfkm;Ptk2b;Gpd1;Pgam1;Cltc;Apoe;Acot7;Asns;Pc;Itpa;Cbs;Nme1;Guk1;Coq5;Aldh1l1;Pfkp;Nme2;Enoph1;Akr1b1;Cnp;Ndufa9;Mthfd1l;Ap2a1;Got2;Mri1;Gls;Vcp;Prkaa1;Cyb5r3;Ptges3;Sord;Gpi
GO:0090087	regulation of peptide transport	http://amigo.geneontology.org/amigo/term/GO:0090087	488	44	21.1456	2.08081	3.48585e-06	3.45541e-05	24366;24392;24399;24686;25150;25183;25479;25673;25741;29167;29177;29647;29753;54319;56029;59267;64310;64465;65178;65248;81732;81743;85252;89816;113965;114114;116590;116654;117103;117287;117550;140908;287931;292804;294560;299858;300666;301252;304859;306182;360921;361596;361967;100359982	geneontology_Biological_Process_noRedundant	Pfkl;Dnm1l;Vps35;Picalm;Cask;Dctn1;Pde2a;Actr3;Snap91;Park7;Ywhae;Anxa5;Rab8a;Lrp1;Fyn;Rufy3;Hsp90ab1;Xpo1;Ppid;Syt7;Prnp;Gja1;Idh2;Dhx9;Glud1;Hpca;C2cd2l;Arf1;Mpc2;Cdc42;Kif5b;Hadh;Mapk1;Mcu;Ppm1f;Srcin1;Ezr;Exoc4;Gdi1;Fgb;Cdk5;Prkaa1;Ipo5;Gpi
rno00190	Oxidative phosphorylation	http://www.kegg.jp/kegg-bin/show_pathway?rno00190+157074+25282+25488+289217+291969+293991+295923+297797+299739+299971+300047+301123+310856+315167+361385+361663+362440+681418+685232+94194	143	20	6.19636	3.2277	3.57481e-06	3.5157e-05	157074;25282;25488;289217;291969;293991;295923;297797;299739;299971;300047;301123;310856;315167;361385;361663;362440;681418;685232;94194	pathway_KEGG	Ndufa6;Atp6v1c1;Atp6v1a;Ppa2;Lhpp;Ndufa11;Cyc1;Sdha;Sdhc;Ndufb8;Ndufa5;Atp6v0d1;Atp6v1h;Cox6a1;Ndufa9;Cox5b;Ndufa12;Ndufb7;Ndufs3;Ndufb10
GO:0005798	Golgi-associated vesicle	http://amigo.geneontology.org/amigo/term/GO:0005798	108	17	4.67977	3.63266	3.769e-06	3.67772e-05	24392;50568;54241;56042;58817;64161;64310;84599;93646;94197;114114;117103;290659;295461;300674;304978;310710	geneontology_Cellular_Component_noRedundant	Dnm1l;Uso1;Copa;Rab8a;Cltc;Sec23a;Sec22b;Sec31a;Gja1;Arf1;Arcn1;Pi4ka;Cope;Rab14;Sec24b;Cspg5;Tmed10
rno05030	Cocaine addiction	http://www.kegg.jp/kegg-bin/show_pathway?rno05030+140908+24408+24416+25636+25686+25750+29253+293508+29495+29627+81664	47	11	2.03656	5.40125	3.89524e-06	3.77143e-05	140908;24408;24416;25636;25686;25750;29253;293508;29495;29627;81664	pathway_KEGG	Grin1;Gnai2;Prkaca;Prkacb;Gnai1;Gria2;Dlg4;Cdk5;Grm3;Maoa;Maob
GO:0016049	cell growth	http://amigo.geneontology.org/amigo/term/GO:0016049	351	35	15.2092	2.30123	3.96506e-06	3.80548e-05	24392;25183;25498;25529;25595;25728;25751;29409;29411;50646;50686;56718;64465;79215;79559;81653;81732;83572;83765;89816;116549;116645;116724;117282;140908;171297;294568;295923;299799;301252;308666;360921;363445;497198;684352	geneontology_Biological_Process_noRedundant	Ppt1;Nlgn3;Rtn4;Picalm;Epb41l3;Impact;Actr3;Mtpn;Ptk2b;Twf2;Alcam;Rufy3;Hsp90ab1;Dbn1;Cyfip1;Apoe;Csnk2a1;Gja1;Plaa;Mag;Hnrnpk;Ptprs;Cdc42;Map2;Wasf1;Gdi1;Cdk5;Rab21;Dnm2;Npm1;Usp9x;Mtor;Ndufs3;Gsk3a;Pafah1b1
GO:0016874	ligase activity	http://amigo.geneontology.org/amigo/term/GO:0016874	120	18	5.19974	3.46171	3.99133e-06	3.80548e-05	25014;25104;25288;25612;29545;113976;116483;117243;117553;266975;291624;292023;294810;301544;313047;314432;314442;361472	geneontology_Molecular_Function_noRedundant	Aars;Yars;Uchl1;Acat1;Tars;Lars;Acsl1;Sars;Asns;Pc;Acsl4;Acsl6;Uba3;Wars;Uba1;Farsb;Dars;Mthfd1l
GO:0005543	phospholipid binding	http://amigo.geneontology.org/amigo/term/GO:0005543	307	32	13.3027	2.40553	4.06895e-06	3.85009e-05	24832;25291;25498;25673;25721;25728;26989;29423;29525;59267;64303;64829;65178;83809;84390;89816;117028;117099;171116;171381;288700;289992;290527;291245;300666;306400;313494;361433;362375;365410;367160;684352	geneontology_Molecular_Function_noRedundant	Bin1;Actn2;Picalm;Cpne7;Snap91;Pfn1;Cadps;Gap43;Anxa5;Twf2;Lancl2;Opa1;Osbp;Anxa11;Apoe;Unc13a;Psd;Syt7;C2cd2l;Fermt2;Arhgap35;Pitpna;Hcn1;Got2;Bdh1;Anxa3;Nsfl1c;Thy1;Cpne4;Npm1;Tln1;Rab35
GO:0019867	outer membrane	http://amigo.geneontology.org/amigo/term/GO:0019867	145	20	6.28302	3.18318	4.44006e-06	4.14596e-05	24392;25035;25275;25288;25750;56718;81743;83532;114114;117243;171116;171155;191575;287721;288150;291709;294568;300111;312890;313867	geneontology_Cellular_Component_noRedundant	Dnm1l;Pde2a;Mtx2;Acsl1;Opa1;Gja1;Nme1;Samm50;Acsl6;Lrpprc;Wasf1;Hadhb;Cnp;Vat1;Gdap1;Slc25a46;Cyb5r3;Mtor;Vdac3;Maob
rno04925	Aldosterone synthesis and secretion	http://www.kegg.jp/kegg-bin/show_pathway?rno04925+171140+24213+24214+24215+24654+24681+25023+25636+29340+293508+29598+302950+307124+309207+50663+81743	98	16	4.24645	3.76785	4.44803e-06	4.14596e-05	171140;24213;24214;24215;24654;24681;25023;25636;29340;293508;29598;302950;307124;309207;50663;81743	pathway_KEGG	Plcb1;Atp2b1;Prkce;Pde2a;Calm2;Prkcg;Atp2b2;Camk1d;Prkaca;Prkacb;Prkcb;Atp1a3;Adcy9;Atp1b2;Camk2g;Dagla
GO:0051345	positive regulation of hydrolase activity	http://amigo.geneontology.org/amigo/term/GO:0051345	446	41	19.3257	2.12153	4.68269e-06	4.33236e-05	24408;24832;25150;25183;25751;29177;29614;50646;50664;54245;58817;79563;81022;83579;89816;114705;116643;116645;117028;140673;170851;192213;207119;287931;289350;291624;296654;301252;303222;304859;306400;310533;311193;311911;313644;316009;360739;360840;404781;681996;100361417	geneontology_Biological_Process_noRedundant	Rab3gap2;Stxbp5;Bin1;Picalm;Rin1;Arhgap1;Gnb5;Grin1;Ranbp1;Lars;Ptk2b;Plxnb1;Ahsa1;Fyn;Hsp90ab1;Sec23a;Tbcd;Rapgef2;Gsn;Arhgap44;Plaa;Iqsec3;Dhx9;Map2k1;Rgs14;Hpca;Napa;Srgap2;Arhgap35;Crk;Gnao1;Psme2;Ppm1f;Rap1gap;Grpel1;Gdi1;Dnm2;Rabgap1;Vcp;Thy1;Rasgrf1
rno05100	Bacterial invasion of epithelial cells	http://www.kegg.jp/kegg-bin/show_pathway?rno05100+117515+25751+294568+297518+301511+303135+305227+54241+54245+56003+64465+682507+81824+83788	78	14	3.37983	4.14222	5.61715e-06	5.15869e-05	117515;25751;294568;297518;301511;303135;305227;54241;54245;56003;64465;682507;81824;83788	pathway_KEGG	Arpc1a;Sept3;Sept11;Wasl;Sept8;Arpc4;Cltc;Arpc2;Crk;Cdc42;Sept9;Wasf1;Sept2;Dnm2
GO:0072350	tricarboxylic acid metabolic process	http://amigo.geneontology.org/amigo/term/GO:0072350	32	9	1.3866	6.49071	5.83524e-06	5.31987e-05	24399;81654;94173;114096;157074;170587;289217;289950;361596	geneontology_Biological_Process_noRedundant	Sdha;Sdhc;Idh3B;Idh2;Glud1;Idh3a;Dlat;Cs;Pdhb
GO:0043204	perikaryon	http://amigo.geneontology.org/amigo/term/GO:0043204	149	20	6.45634	3.09773	6.76126e-06	6.07541e-05	24668;25529;25604;25669;25673;25721;29177;29627;65179;65180;83633;116590;140908;170851;171373;287061;317385;360921;361532;362361	geneontology_Cellular_Component_noRedundant	Pcmt1;Ppp1ca;Hnrnpa2b1;Anxa5;Ppp5c;Slc12a5;Rufy3;Sirt2;Kcnd2;Fus;Map2k1;Hpca;Ptprs;Gria2;Mapk1;Rogdi;Got2;Cdk5;Cpe;Gabbr2
GO:0008022	protein C-terminus binding	http://amigo.geneontology.org/amigo/term/GO:0008022	149	20	6.45634	3.09773	6.76126e-06	6.07541e-05	25252;25577;29495;29647;50646;50872;54241;54319;58948;64053;65248;84390;85238;192213;192277;286993;292640;294708;298848;308578	geneontology_Molecular_Function_noRedundant	Dlg2;Vta1;Sgtb;Cask;Dlg3;Ptk2b;Stip1;Cltc;Synj1;Taok1;Hpcal4;Dlg1;Dlg4;Hcn1;Ezr;Ap2a1;Mapre3;Prkaa1;Rasgrf1;Ywhaq
GO:0030705	cytoskeleton-dependent intracellular transport	http://amigo.geneontology.org/amigo/term/GO:0030705	113	17	4.89642	3.47192	7.07317e-06	6.31028e-05	25595;29167;29489;29545;63836;64465;83572;83764;117550;140667;170714;170851;294568;299799;308777;314633;363288	geneontology_Biological_Process_noRedundant	Flot2;Dctn1;Ap3b2;Dync1h1;Uchl1;Ap3m2;Dynlrb1;Map2k1;Actn4;Kif1a;Ap3d1;Cdc42;Kif5b;Map2;Wasf1;Rab21;Pafah1b1
GO:0034762	regulation of transmembrane transport	http://amigo.geneontology.org/amigo/term/GO:0034762	407	38	17.6358	2.15471	7.3061e-06	6.47185e-05	24232;24392;24686;24766;24832;25023;25045;25150;25291;25576;25577;25639;25751;29177;29272;29340;29495;29715;29738;29753;50646;56718;64310;65180;65248;83579;84390;117103;117243;117287;117550;140729;171297;291245;306243;360950;362013;364052	geneontology_Biological_Process_noRedundant	Cacna2d3;Nlgn3;Actn2;Dbi;Prkce;Gnb5;Fkbp1a;Park7;Ywhae;Ptk2b;Rab8a;Fyn;Ywhah;Wdr1;Prnp;Gja1;Kcnd2;Kcnab2;Acsl6;Prkcb;Hpca;Ahcyl1;Slc8a1;Arf1;Scn2a;Cacng8;Kif5b;Dpp6;Dlg4;Hcn1;Pea15;Anxa3;Dnm2;C3;Thy1;Prkaa1;Mtor;Ywhaq
rno04725	Cholinergic synapse	http://www.kegg.jp/kegg-bin/show_pathway?rno04725+114117+116590+170851+171140+24400+24654+24681+25023+25150+25636+25686+293508+302950+50664+80850+81664+83579	114	17	4.93975	3.44147	7.98404e-06	7.02258e-05	114117;116590;170851;171140;24400;24654;24681;25023;25150;25636;25686;293508;302950;50664;80850;81664;83579	pathway_KEGG	Plcb1;Gnb5;Prkcg;Gnai2;Gnb1;Prkaca;Fyn;Prkacb;Gnai1;Prkcb;Map2k1;Adcy9;Gnao1;Mapk1;Gng3;Gng2;Camk2g
GO:0001101	response to acid chemical	http://amigo.geneontology.org/amigo/term/GO:0001101	378	36	16.3792	2.19791	8.18384e-06	7.14798e-05	24192;24213;24248;24250;24392;24423;24426;24654;25150;25288;25612;25728;29154;29177;29489;50646;56718;65179;65248;79256;81743;83782;84390;85238;114766;117282;171116;191575;291624;296654;296849;306182;312890;360739;362375;684352	geneontology_Biological_Process_noRedundant	Plcb1;Pde2a;Dync1h1;Ranbp1;Lars;Ptk2b;Twf2;Lancl2;Acsl1;Ppp5c;Opa1;Fyn;Gstp1;Synj1;Apoe;Asns;Capn2;Cbs;Gja1;Nme1;Gsn;Hnrnpk;Hpca;Hnrnpd;Nme2;Atp1a3;Akr1b1;Gstm1;Gdap1;Hcn1;Phb2;Prkaa1;Mtor;Cat;Pdk3;Ipo5
rno04371	Apelin signaling pathway	http://www.kegg.jp/kegg-bin/show_pathway?rno04371+114117+116590+170851+24400+24654+25636+25686+29340+293508+29715+302950+365355+50663+56718+64670+65248+80850+81664+83579	141	19	6.10969	3.10981	1.07976e-05	9.36538e-05	114117;116590;170851;24400;24654;25636;25686;29340;293508;29715;302950;365355;50663;56718;64670;65248;80850;81664;83579	pathway_KEGG	Plcb1;Prkce;Gnb5;Calm2;Gnai2;Gnb1;Prkaca;Prkacb;Gnai1;Gabarapl2;Map2k1;Rras2;Slc8a1;Adcy9;Mapk1;Gng3;Gng2;Prkaa1;Mtor
GO:0051961	negative regulation of nervous system development	http://amigo.geneontology.org/amigo/term/GO:0051961	235	26	10.1828	2.55332	1.12934e-05	9.66848e-05	24832;24923;25183;25529;25595;25613;25669;29409;50686;50864;64202;81732;83572;83765;117282;140908;293508;299858;310533;310635;313644;360840;360921;361532;361596;500988	geneontology_Biological_Process_noRedundant	Rtn4;Actr3;Lrp1;Rufy3;Sirt2;Rapgef2;Prkacb;Idh2;Mag;Ntm;Hnrnpk;Srgap2;Ptprs;Calr;Rap1gap;Map2;Ptprz1;Gdi1;Cdk5;Stx1b;Ddx6;Cpe;Thy1;Gsk3a;Pafah1b1;Arhgef2
rno00010	Glycolysis / Gluconeogenesis	http://www.kegg.jp/kegg-bin/show_pathway?rno00010+24642+24645+25630+25741+289950+292804+298942+315722+361042+60416+65152+65183+81654	72	13	3.11984	4.16688	1.13018e-05	9.66848e-05	24642;24645;25630;25741;289950;292804;298942;315722;361042;60416;65152;65183;81654	pathway_KEGG	Pfkl;Pck2;Pkm;Pfkm;Pgam1;Dld;Aldh3a2;Pfkp;Adpgk;Dlat;Pgm1;Pdhb;Gpi
rno04962	Vasopressin-regulated water reabsorption	http://www.kegg.jp/kegg-bin/show_pathway?rno04962+25636+287709+288779+29167+293508+29489+299850+302950+79434+81655	43	10	1.86324	5.36699	1.14216e-05	9.70444e-05	25636;287709;288779;29167;293508;29489;299850;302950;79434;81655	pathway_KEGG	Rab5c;Rab5b;Dctn1;Dync1h1;Rab11b;Prkaca;Prkacb;Adcy9;Dctn2;Dync1li2
rno04730	Long-term depression	http://www.kegg.jp/kegg-bin/show_pathway?rno04730+116590+117281+170851+24654+24672+24681+25023+25686+25740+29627+50664+81664	62	12	2.68653	4.46672	1.17044e-05	9.87758e-05	116590;117281;170851;24654;24672;24681;25023;25686;25740;29627;50664;81664	pathway_KEGG	Plcb1;Ppp2r1a;Prkcg;Gnaz;Gnai2;Ppp2ca;Gnai1;Prkcb;Map2k1;Gria2;Gnao1;Mapk1
GO:0035249	synaptic transmission, glutamatergic	http://amigo.geneontology.org/amigo/term/GO:0035249	83	14	3.59649	3.89269	1.18806e-05	9.95901e-05	24416;24418;25558;29546;29627;50646;64829;81672;116638;140673;140729;140908;171297;687090	geneontology_Biological_Process_noRedundant	Nlgn3;Stxbp1;Homer1;Ptk2b;Grm7;Tprg1l;Unc13a;Napa;Gria2;Cacng8;Grm5;Slc17a7;Cdk5;Grm3
rno04062	Chemokine signaling pathway	http://www.kegg.jp/kegg-bin/show_pathway?rno04062+114117+116590+170851+171337+24400+24654+25023+25537+25636+25686+293508+302950+311647+50646+50686+54245+64465+682507+80850+81504+81664+83579	181	22	7.84294	2.80507	1.21231e-05	0.000100945	114117;116590;170851;171337;24400;24654;25023;25537;25636;25686;293508;302950;311647;50646;50686;54245;64465;682507;80850;81504;81664;83579	pathway_KEGG	Plcb1;Rap1b;Gnb5;Wasl;Gnai2;Grb2;Ptk2b;Gnb1;Prkaca;Prkacb;Gnai1;Prkcb;Rock2;Map2k1;Crk;Cdc42;Adcy9;Mapk1;Gng3;Gng2;Prex1;Gsk3a
GO:0006520	cellular amino acid metabolic process	http://amigo.geneontology.org/amigo/term/GO:0006520	222	25	9.61952	2.59888	1.22125e-05	0.000101016	24250;24380;24398;24399;25014;25604;25612;25721;29592;29711;63938;64313;116483;117287;246302;266975;288912;291624;292023;294810;301544;305177;313047;314442;681913	geneontology_Biological_Process_noRedundant	Pcmt1;Aars;Oat;Yars;Park7;Acat1;Tars;Bcat1;Lars;Sars;Pcyox1;Asns;Cbs;Glud1;Gad2;Enoph1;Hibadh;Wars;Farsb;Dars;Got2;Bckdhb;Mri1;Gls;Gstz1
GO:0051603	proteolysis involved in cellular protein catabolic process	http://amigo.geneontology.org/amigo/term/GO:0051603	497	43	21.5356	1.99669	1.26348e-05	0.000103821	24681;25490;29154;29545;29614;29669;29675;29676;29677;50646;50686;64624;65040;81827;83806;83809;116643;116645;116725;117262;246216;246302;287155;287280;287670;287772;287984;289990;294708;297593;298012;301252;301555;303606;307641;307821;313658;317381;360471;361258;361532;361970;363445	geneontology_Biological_Process_noRedundant	Sgtb;Dlgap1;Cul5;Psma2;Trim2;Prkcg;Usp5;Uchl1;Psmd2;Ptk2b;Psmc3;Psmb2;Psmd12;Hsp90ab1;Nedd8;Psmc6;Rad23b;Pcyox1;Sirt2;Capn2;Prpf19;Psmd7;Psmd3;Plaa;Ccdc22;Ubr4;Csnk2a2;Psmb3;Usp7;Psmc4;Skp1;Stub1;Psme2;Cul3;Cul2;Psmd1;Ccdc47;Nsfl1c;Psmc5;Ube2n;Vcp;Usp9x;Gsk3a
GO:0000149	SNARE binding	http://amigo.geneontology.org/amigo/term/GO:0000149	95	15	4.11646	3.64391	1.33881e-05	0.000109292	24923;25558;29627;59267;64060;64159;64829;65033;65178;81022;84599;89816;140673;252881;310710	geneontology_Molecular_Function_noRedundant	Stxbp5;Picalm;Sptan1;Snap91;Stxbp1;Unc13a;Sec22b;Syt7;Stx12;Exoc3;Napa;Gria2;Stx1b;Vps33b;Tmed10
rno04261	Adrenergic signaling in cardiomyocytes	http://www.kegg.jp/kegg-bin/show_pathway?rno04261+116590+117281+140729+171140+24213+24214+24215+24654+24668+24672+25636+25686+293508+29598+29715+302950+306243+50663+81664	144	19	6.23969	3.04502	1.46665e-05	0.000118951	116590;117281;140729;171140;24213;24214;24215;24654;24668;24672;25636;25686;293508;29598;29715;302950;306243;50663;81664	pathway_KEGG	Plcb1;Atp2b1;Cacna2d3;Ppp2r1a;Ppp1ca;Calm2;Atp2b2;Gnai2;Prkaca;Ppp2ca;Prkacb;Gnai1;Slc8a1;Atp1a3;Adcy9;Cacng8;Mapk1;Atp1b2;Camk2g
GO:0042176	regulation of protein catabolic process	http://amigo.geneontology.org/amigo/term/GO:0042176	254	27	11.0061	2.45318	1.60201e-05	0.000129091	24392;24681;25150;25479;29614;29677;50646;54319;65040;81827;83806;85252;116549;116643;117262;287155;287670;287984;289990;297593;298012;299858;301252;307641;310710;317381;361532	geneontology_Biological_Process_noRedundant	Vps35;Dlgap1;Prkcg;Usp5;Psmd2;Ptk2b;Psmc3;Lrp1;Fyn;Hsp90ab1;Xpo1;Psmc6;Rad23b;Sirt2;Csnk2a1;Sec22b;Gja1;Psmd3;Ccdc22;Csnk2a2;Psmc4;Stub1;Psme2;Ezr;Psmd1;Psmc5;Vcp
GO:0006979	response to oxidative stress	http://amigo.geneontology.org/amigo/term/GO:0006979	360	34	15.5992	2.1796	1.73498e-05	0.00013891	24248;24426;24686;25150;25528;25751;29154;29328;29338;29384;29715;50646;50664;54245;65179;65183;65248;79239;79256;83782;84355;94167;114705;116590;117287;170851;171140;287069;289217;299739;361092;361532;361967;497198	geneontology_Biological_Process_noRedundant	Sirpa;Impact;Prdx2;Park7;Trap1;Hmox2;Ptk2b;Ppp5c;Fyn;Ppid;Gstp1;Sirt2;Capn2;Prnp;Sdhc;H2afy;Aldh3a2;Map2k1;Rgs14;Hnrnpd;Nme2;Slc8a1;Gpx4;Crk;Gnao1;Mapk1;Atox1;Prdx6;Stk24;Dnm2;Ndufa12;Camk2g;Prkaa1;Cat
rno04971	Gastric acid secretion	http://www.kegg.jp/kegg-bin/show_pathway?rno04971+171140+24213+24214+24654+24681+25023+25636+25686+293508+302950+50663+54319+81664	75	13	3.24984	4.0002	1.79062e-05	0.000142451	171140;24213;24214;24654;24681;25023;25636;25686;293508;302950;50663;54319;81664	pathway_KEGG	Plcb1;Calm2;Prkcg;Gnai2;Prkaca;Prkacb;Gnai1;Prkcb;Atp1a3;Adcy9;Ezr;Atp1b2;Camk2g
GO:0043087	regulation of GTPase activity	http://amigo.geneontology.org/amigo/term/GO:0043087	286	29	12.3927	2.34008	1.93359e-05	0.000152852	24832;25183;50646;50664;54245;56718;58817;81022;83572;83579;114705;117028;170851;192213;207119;289350;291624;300147;303222;306400;310533;311193;311911;313644;316009;360739;360840;404781;100361417	geneontology_Biological_Process_noRedundant	Rab3gap2;Stxbp5;Bin1;Rin1;Arhgap1;Gnb5;Ranbp1;Lars;Ptk2b;Plxnb1;Sec23a;Tbcd;Rapgef2;Arhgap44;Iqsec3;Map2k1;Rgs14;Srgap2;Arhgap35;Crk;Gnao1;Rap1gap;Sbf1;Gdi1;Rabgap1;Thy1;Mtor;Rasgrf1;Pafah1b1
GO:0030276	clathrin binding	http://amigo.geneontology.org/amigo/term/GO:0030276	46	10	1.99323	5.01697	2.15906e-05	0.000169601	54241;59267;65178;89816;114114;117277;140670;299858;308578;313409	geneontology_Molecular_Function_noRedundant	Dnm1l;Picalm;Snap91;Lrp1;Cltc;Epn1;Syt7;Dnajc6;Ap2a1;Ap2b1
GO:0051020	GTPase binding	http://amigo.geneontology.org/amigo/term/GO:0051020	364	34	15.7725	2.15564	2.18377e-05	0.00017047	24400;25037;25183;25537;58983;60627;64303;81022;84009;85252;114114;114559;117028;170851;171381;192213;289350;294568;300147;303222;306182;308666;308939;310192;310533;310635;311193;311911;314212;315676;360739;360840;362273;404781	geneontology_Molecular_Function_noRedundant	Dmxl2;Rab3gap2;Dnm1l;Stxbp5;Bin1;Rabggta;Arhgap1;Pfn1;Ranbp1;Gnb1;Xpo1;Trio;Cyfip1;Psd;Rapgef2;Arhgap44;Iqsec3;Arhgef7;Rock2;Map2k1;Daam1;Srgap2;Kalrn;Exoc5;Ipo7;Sbf1;Wasf1;Cse1l;Mobp;Gdi1;Rabgap1;Rasgrf1;Arhgef2;Ipo5
GO:0072524	pyridine-containing compound metabolic process	http://amigo.geneontology.org/amigo/term/GO:0072524	111	16	4.80976	3.32657	2.26877e-05	0.000175498	24642;25062;25630;25741;29738;60416;60666;65152;65248;94173;114096;116643;292804;310378;361596;100359982	geneontology_Biological_Process_noRedundant	Pfkl;Gpd2;Pkm;Pfkm;Gpd1;Pgam1;Idh3B;Kcnab2;Idh2;Nnt;Pfkp;Mpc2;Idh3a;Vcp;Prkaa1;Gpi
GO:0098982	GABA-ergic synapse	http://amigo.geneontology.org/amigo/term/GO:0098982	66	12	2.85986	4.19601	2.27628e-05	0.000175498	24215;29423;29598;59267;81672;83633;114559;114766;171297;305227;404781;613226	geneontology_Cellular_Component_noRedundant	Atp2b1;Nlgn3;Gap43;Atp2b2;Sept11;Grm7;Syt7;Iqsec3;Arhgef7;Slc6a17;Phb2;Gabbr2
GO:1901652	response to peptide	http://amigo.geneontology.org/amigo/term/GO:1901652	493	42	21.3623	1.96608	2.30203e-05	0.000176395	24192;24213;24248;24392;24426;24654;24686;25023;25150;25630;25673;25721;25728;29648;50686;54245;56718;65248;81504;81530;81664;83782;94194;113965;117099;117103;117243;117282;140908;140931;170670;171116;171337;192213;291245;299858;300047;306243;308666;310635;316021;362013	geneontology_Biological_Process_noRedundant	Plcb1;Cacna2d3;Actn2;Rap1b;Pdk2;Pkm;Gnai2;Grb2;Anxa5;Opa1;Rab8a;Lrp1;Fyn;Cyc1;Gstp1;Cyfip1;Apoe;Hnrnph1;Prnp;Gja1;Hadha;Acsl6;Prkcb;Hnrnpk;Ahcyl1;Nme2;Atp1a3;Crk;Akr1b1;Hadh;Nudc;Cox5b;Got2;Bdh1;Cdk5;Epm2aip1;Prkaa1;Mtor;Rasgrf1;Cat;Gsk3a;Arhgef2
GO:0030165	PDZ domain binding	http://amigo.geneontology.org/amigo/term/GO:0030165	88	14	3.81314	3.67151	2.36594e-05	0.000179095	24215;24392;24418;25252;29382;29495;29598;29627;29647;58948;64053;81672;116654;310533	geneontology_Molecular_Function_noRedundant	Dlg2;Atp2b1;Cask;Dlg3;Ctbp1;Atp2b2;Grm7;Gja1;Rapgef2;Gria2;Dlg1;Dlg4;Exoc4;Grm5
rno04540	Gap junction	http://www.kegg.jp/kegg-bin/show_pathway?rno04540+116590+170851+24392+24418+24654+24681+25023+25636+25686+29213+293508+302950+81504+81664	88	14	3.81314	3.67151	2.36594e-05	0.000179095	116590;170851;24392;24418;24654;24681;25023;25636;25686;29213;293508;302950;81504;81664	pathway_KEGG	Plcb1;Prkcg;Gnai2;Grb2;Prkaca;Gja1;Prkacb;Gnai1;Prkcb;Map2k1;Adcy9;Mapk1;Grm5;Tubb4a
GO:0098876	vesicle-mediated transport to the plasma membrane	http://amigo.geneontology.org/amigo/term/GO:0098876	77	13	3.3365	3.8963	2.40001e-05	0.000180579	24923;25479;25751;60627;64310;79117;79434;116654;117103;171455;303222;317381;362587	geneontology_Biological_Process_noRedundant	Macf1;Vps35;Exoc2;Rab11b;Arf5;Rab8a;Arhgap44;Ccdc22;Arf1;Exoc5;Exoc4;Stx1b;Dnm2
GO:0070997	neuron death	http://amigo.geneontology.org/amigo/term/GO:0070997	275	28	11.9161	2.34977	2.48653e-05	0.000185968	24681;24686;25150;25479;25498;25558;25613;25728;29154;29338;29409;29411;50646;50686;56718;64465;65179;81672;89816;117287;140670;140908;292023;292804;299858;301252;361970;365355	geneontology_Biological_Process_noRedundant	Ppt1;Aars;Vps35;Picalm;Trim2;Stxbp1;Prkcg;Prdx2;Park7;Ptk2b;Ppp5c;Grm7;Lrp1;Fyn;Hsp90ab1;Apoe;Capn2;Prnp;Mag;Rras2;Cdc42;Ptprz1;Ap2b1;Cdk5;Npm1;Mtor;Gsk3a;Gpi
rno00970	Aminoacyl-tRNA biosynthesis	http://www.kegg.jp/kegg-bin/show_pathway?rno00970+116483+266975+291624+292023+294810+297113+301544+313047+314442+364070	47	10	2.03656	4.91023	2.63731e-05	0.000196071	116483;266975;291624;292023;294810;297113;301544;313047;314442;364070	pathway_KEGG	Aars;Yars;Iars2;Tars;Lars;Sars;Wars;Gars;Farsb;Dars
GO:0044445	cytosolic part	http://amigo.geneontology.org/amigo/term/GO:0044445	233	25	10.0962	2.47619	2.79876e-05	0.000206843	24440;24681;25741;29236;29340;56718;60416;65033;65152;81022;81729;81827;83806;117262;161477;287984;288620;289990;294708;294864;299809;302500;314721;362361;100361854	geneontology_Cellular_Component_noRedundant	Pfkl;Stxbp5;Sgtb;Cct2;Prkce;Hnrnpa2b1;Prkcg;Cct6a;Psmd2;LOC100361854;Pfkm;Psmc6;Mcts1;Cct5;Stx12;Rps13;Pfkp;Rpsa;Psmc4;Hbb;Anks1b;Psmd1;Psmc5;Mtor;Rpl10a
GO:0040008	regulation of growth	http://amigo.geneontology.org/amigo/term/GO:0040008	465	40	20.149	1.98521	2.89131e-05	0.000212426	24232;24392;24586;24654;25023;25183;25498;25529;25595;25728;25751;29409;29411;29423;50568;50646;50686;54319;56718;64465;79215;81653;81732;83572;83765;89816;116549;116645;116724;117282;140908;287931;295923;299799;302500;308666;360921;362160;365410;684352	geneontology_Biological_Process_noRedundant	Plcb1;Ppt1;Rtn4;Picalm;Epb41l3;Actr3;Ncam1;Gap43;Mtpn;Ptk2b;Twf2;Celf1;Rufy3;Osbp;Mcts1;Dbn1;Cyfip1;Apoe;Csnk2a1;Gja1;Plaa;Prkcb;Mag;Hnrnpk;Ptprs;Cdc42;Ppm1f;Map2;Ezr;Gdi1;Cdk5;Rab21;Dnm2;C3;Cspg5;Npm1;Mtor;Ndufs3;Gsk3a;Pafah1b1
GO:0051301	cell division	http://amigo.geneontology.org/amigo/term/GO:0051301	308	30	13.346	2.24786	3.01713e-05	0.000220374	24248;24668;25686;29167;29340;29489;29648;56003;64030;64310;64465;81664;83572;83788;114514;114705;114764;117515;140908;287606;288700;289820;290527;298848;301555;305227;310635;361532;500282;501083	geneontology_Biological_Process_noRedundant	Pdcd6ip;Ppp1ca;Clasp2;Prkce;Actr2;Dctn1;Sept3;Sept4;Dync1h1;Sept11;Gnai2;Anxa11;Sirt2;Mapre1;Gnai1;Kit;Arl8b;Rgs14;Arf1;Cdc42;Sept9;Nudc;Cul3;Sept2;Mapre3;Cdk5;Cat;Rab35;Pafah1b1;Arhgef2
rno04726	Serotonergic synapse	http://www.kegg.jp/kegg-bin/show_pathway?rno04726+114117+116590+170851+24400+24654+24681+25023+25636+25686+25750+29253+293508+50664+65180+80850+81664+83579	126	17	5.45973	3.11371	3.05809e-05	0.00022059	114117;116590;170851;24400;24654;24681;25023;25636;25686;25750;29253;293508;50664;65180;80850;81664;83579	pathway_KEGG	Plcb1;Gnb5;Prkcg;Gnai2;Gnb1;Prkaca;Kcnd2;Prkacb;Gnai1;Prkcb;Map2k1;Gnao1;Mapk1;Gng3;Gng2;Maoa;Maob
GO:0072593	reactive oxygen species metabolic process	http://amigo.geneontology.org/amigo/term/GO:0072593	192	22	8.31958	2.64436	3.07307e-05	0.00022059	24248;24250;24408;24426;24440;25150;25528;25751;29338;50646;56718;81504;81664;94167;117287;171361;287444;295923;296849;306840;310378;361532	geneontology_Biological_Process_noRedundant	Sirpa;Sirt5;Grin1;Prdx2;Park7;Gnai2;Grb2;Eif5a;Ptk2b;Fyn;Gstp1;Sirt2;Cbs;Nnt;Hbb;Prdx6;Dnm2;Mtor;Cat;Ndufs3;Pdk3;Eef1a1
GO:0044389	ubiquitin-like protein ligase binding	http://amigo.geneontology.org/amigo/term/GO:0044389	192	22	8.31958	2.64436	3.07307e-05	0.00022059	24264;25490;25725;29545;29611;29753;50646;58948;64202;64624;94167;114114;116643;116725;287155;292804;293508;293705;299809;301252;301555;361258	geneontology_Molecular_Function_noRedundant	Dnm1l;Cct2;Cul5;Dlg3;Uchl1;Ywhae;Prkar1a;Ptk2b;Dbt;Hsp90ab1;Nedd8;Prkacb;Calr;Stub1;Ckb;Prdx6;Cul3;Cul2;Otub1;Ube2n;Vcp;Gpi
GO:0098797	plasma membrane protein complex	http://amigo.geneontology.org/amigo/term/GO:0098797	418	37	18.1124	2.0428	3.12169e-05	0.000222799	24213;24392;24400;24408;24766;25252;25639;25686;25740;29272;29495;29627;50646;50664;54241;58948;64053;65046;65180;79559;81504;81664;83579;83633;83764;84008;84390;84599;85238;114117;116563;140670;140729;157074;291969;306243;308578	geneontology_Cellular_Component_noRedundant	Dlg2;Cacna2d3;Flot2;Dlg3;Gnb5;Fkbp1a;Gnaz;Grin1;Gnai2;Grb2;Ptk2b;Gnb1;Alcam;Cltc;Ap2s1;Synj1;Ap2m1;Gja1;Sdha;Kcnd2;Gnai1;Atp6v0d1;Gria2;Scn2a;Atp1a3;Cacng8;Dlg1;Gnao1;Gng3;Dpp6;Dlg4;Hcn1;Ap2a1;Ap2b1;Cntnap1;Tmed10;Gabbr2
GO:0030496	midbody	http://amigo.geneontology.org/amigo/term/GO:0030496	114	16	4.93975	3.23903	3.17954e-05	0.000225639	25183;25686;25751;60627;64465;81664;116654;117103;117515;171455;252881;290527;298848;361532;500282;501083	geneontology_Cellular_Component_noRedundant	Pdcd6ip;Exoc2;Gnai2;Rab8a;Anxa11;Sirt2;Exoc3;Gnai1;Arl8b;Cdc42;Exoc5;Sept2;Exoc4;Mapre3;Gdi1;Dnm2
GO:0005975	carbohydrate metabolic process	http://amigo.geneontology.org/amigo/term/GO:0005975	404	36	17.5058	2.05646	3.46451e-05	0.000244473	24192;24439;24642;24668;24788;25062;25104;25630;25739;25741;50567;50646;50686;54241;56718;60416;60666;65152;65248;81530;81654;85238;170587;192361;289827;289950;292804;293721;296849;300741;308578;315722;316021;361596;362029;362809	geneontology_Biological_Process_noRedundant	Pfkl;Ppp1ca;Gpd2;Agl;Ganab;Pdk2;Pkm;Pfkm;Ptk2b;Gpd1;Pgam1;Cltc;Synj1;Pygb;Pc;Idh2;Pfkp;Ppp1r2;Adpgk;Ugp2;Hagh;Akr1b1;Mpi;Dlat;Ap2a1;Cs;Pdhb;Epm2aip1;Slc3a2;Prkaa1;Mtor;Pdk3;Gsk3a;Ptges3;Sord;Gpi
GO:0046434	organophosphate catabolic process	http://amigo.geneontology.org/amigo/term/GO:0046434	140	18	6.06636	2.96718	3.48509e-05	0.000244544	24642;24654;25014;25062;25275;25630;25741;26759;60416;60666;65152;65248;81743;85238;94167;116643;292804;311422	geneontology_Biological_Process_noRedundant	Plcb1;Pfkl;Gpd2;Pde2a;Acat1;Pkm;Pfkm;Gpd1;Pgam1;Synj1;Acot7;Itpa;Pfkp;Prdx6;Cnp;Vcp;Prkaa1;Gpi
GO:0098589	membrane region	http://amigo.geneontology.org/amigo/term/GO:0098589	297	29	12.8694	2.25342	3.89802e-05	0.000271991	24215;24392;24686;24832;25150;25230;25669;25686;25725;29154;29409;29411;29598;29647;50646;54245;54319;58920;65180;81664;81743;83537;83764;85252;116590;117258;117287;287444;315215	geneontology_Cellular_Component_noRedundant	Ppt1;Atp2b1;Flot2;Add3;Cask;Pde2a;Park7;Atp2b2;Gnai2;Eif5a;Prkar1a;Ptk2b;Fyn;Xpo1;Capn2;Prnp;Gja1;Kcnd2;Gnai1;Mag;Cntn1;Crk;Gpc1;Mapk1;Ezr;Cpe;Thy1;Mlc1;Smpd2
rno05032	Morphine addiction	http://www.kegg.jp/kegg-bin/show_pathway?rno05032+114117+24400+24681+25023+25636+25686+293508+302950+50664+80850+81664+81743+83579+83633	93	14	4.0298	3.47412	4.4685e-05	0.000310065	114117;24400;24681;25023;25636;25686;293508;302950;50664;80850;81664;81743;83579;83633	pathway_KEGG	Pde2a;Gnb5;Prkcg;Gnai2;Gnb1;Prkaca;Prkacb;Gnai1;Prkcb;Adcy9;Gnao1;Gng3;Gng2;Gabbr2
rno04921	Oxytocin signaling pathway	http://www.kegg.jp/kegg-bin/show_pathway?rno04921+116590+140729+170851+171140+24654+24668+24681+25023+25537+25636+25686+293508+302950+306243+307124+50663+50664+65248+81664	156	19	6.75966	2.81079	4.56324e-05	0.000314889	116590;140729;170851;171140;24654;24668;24681;25023;25537;25636;25686;293508;302950;306243;307124;50663;50664;65248;81664	pathway_KEGG	Plcb1;Cacna2d3;Ppp1ca;Calm2;Prkcg;Gnai2;Camk1d;Prkaca;Prkacb;Gnai1;Prkcb;Rock2;Map2k1;Adcy9;Cacng8;Gnao1;Mapk1;Camk2g;Prkaa1
rno00052	Galactose metabolism	http://www.kegg.jp/kegg-bin/show_pathway?rno00052+24192+24645+25741+289827+296972+363494+60416+65152	32	8	1.3866	5.76952	4.97053e-05	0.000341109	24192;24645;25741;289827;296972;363494;60416;65152	pathway_KEGG	Pfkl;Pfkm;Akr1b10;Pfkp;Ugp2;Akr1b1;Gla;Pgm1
GO:0048589	developmental growth	http://amigo.geneontology.org/amigo/term/GO:0048589	477	40	20.669	1.93527	5.12077e-05	0.000348787	24232;24392;24586;24654;25183;25524;25529;25595;25630;25725;25728;25751;29409;29423;50686;54319;56718;79215;79559;81653;81732;83572;83765;89816;116645;117282;140908;171297;246216;290652;294568;296654;299799;301252;308666;360921;362160;363445;497198;684352	geneontology_Biological_Process_noRedundant	Plcb1;Nlgn3;Rtn4;Picalm;Impact;Actr3;Ncam1;Gap43;Pkm;Mtpn;Prkar1a;Twf2;Alcam;Celf1;Rufy3;Hsp90ab1;Dbn1;Cyfip1;Apoe;Prpf19;Gja1;Gsn;Plaa;Mag;Hnrnpk;Fkbp8;Ptprs;Map2;Wasf1;Ezr;Gdi1;Cdk5;Rab21;Dnm2;C3;Psap;Usp9x;Mtor;Gsk3a;Pafah1b1
GO:0030964	NADH dehydrogenase complex	http://amigo.geneontology.org/amigo/term/GO:0030964	41	9	1.77658	5.06592	5.13826e-05	0.000348787	25488;117287;293991;295923;299739;301123;361385;362440;681418	geneontology_Cellular_Component_noRedundant	Park7;Ndufa11;Ndufb8;Ndufa5;Ndufa9;Ndufa12;Ndufb7;Ndufs3;Ndufb10
GO:0046677	response to antibiotic	http://amigo.geneontology.org/amigo/term/GO:0046677	396	35	17.1591	2.03973	5.24777e-05	0.000354295	24248;24408;24423;24426;25023;25150;25528;25604;25686;25721;25728;25750;29154;29627;29715;50646;50664;54245;65179;65248;79256;81729;81732;117099;117282;117287;171116;192213;287069;287986;289820;293481;296654;360739;497198	geneontology_Biological_Process_noRedundant	Sirpa;Pcmt1;Impact;Actr2;Actr3;Grin1;Park7;Ranbp1;Trap1;Ptk2b;Ppp5c;Opa1;Fyn;Gstp1;Apoe;Capn2;Gsn;Gnai1;Prkcb;Hnrnpk;Tufm;Hnrnpd;Slc8a1;Gria2;Crk;Gnao1;Gstm1;Eif4g1;Got2;Bdh1;Prkaa1;Rpl10a;Rasgrf1;Cat;Maob
GO:0051051	negative regulation of transport	http://amigo.geneontology.org/amigo/term/GO:0051051	350	32	15.1659	2.11	5.73726e-05	0.00038526	24923;25023;25183;25479;25528;25558;25577;25673;25741;25750;29340;29495;29753;50646;50664;54319;56029;56718;81664;81672;81743;83579;113965;117287;140908;171337;287931;291245;308666;311193;361596;364052	geneontology_Biological_Process_noRedundant	Pfkl;Sirpa;Vps35;Actn2;Rap1b;Prkce;Arhgap1;Pde2a;Gnb5;Stxbp1;Park7;Ywhae;Gnai2;Anxa5;Ptk2b;Grm7;Cyfip1;Idh2;Prkcb;Hadh;Gnao1;Ppm1f;Dlg4;Srcin1;Ezr;Pea15;Gdi1;Cdk5;Stx1b;Mtor;Maob;Ywhaq
GO:0030031	cell projection assembly	http://amigo.geneontology.org/amigo/term/GO:0030031	335	31	14.5159	2.13558	5.95767e-05	0.000397921	25751;29167;29423;54319;56003;56718;58823;60627;64030;64465;81653;81732;83532;83788;114559;117103;117515;170821;192249;287606;289820;291245;292597;296654;305227;306400;306439;308666;360840;683788;684352	geneontology_Biological_Process_noRedundant	Actn2;Actr2;Dctn1;Sept3;Actr3;Sept4;Gap43;Sept11;Atxn10;Twf2;Rab8a;Nckap1;Dbn1;Cyfip1;Gsn;Gpm6a;Kit;Arhgef7;Srgap2;Ehd3;Arhgap35;Ttyh1;Fscn1;Cdc42;Exoc5;Sept9;Sept2;Ezr;Dnm2;Mtor;Vdac3
rno05203	Viral carcinogenesis	http://www.kegg.jp/kegg-bin/show_pathway?rno05203+100910200+116590+117282+24232+25252+25576+25577+25630+25636+291969+293508+296654+29753+313658+360471+360739+364073+63836+64465+64470+81504+81634+83532+84581	230	24	9.96617	2.40815	6.30299e-05	0.000418747	100910200;116590;117282;24232;25252;25576;25577;25630;25636;291969;293508;296654;29753;313658;360471;360739;364073;63836;64465;64470;81504;81634;83532;84581	pathway_KEGG	Ddx3y;Ranbp1;Actn1;Pkm;Ywhae;Grb2;Prkaca;Ywhah;Ddb1;Hdac6;Gsn;Prkacb;LOC100910200;Hnrnpk;Actn4;Ubr4;Atp6v0d1;Usp7;Cdc42;Dlg1;Mapk1;C3;Vdac3;Ywhaq
GO:0060589	nucleoside-triphosphatase regulator activity	http://amigo.geneontology.org/amigo/term/GO:0060589	202	22	8.7529	2.51345	6.6718e-05	0.000440904	24832;25183;25528;58817;79563;81022;83579;114705;192213;207119;289350;291624;303222;306400;310533;311193;311911;313644;360739;360840;681996;100361417	geneontology_Molecular_Function_noRedundant	Rab3gap2;Sirpa;Stxbp5;Rin1;Arhgap1;Gnb5;Ranbp1;Lars;Ahsa1;Sec23a;Tbcd;Rapgef2;Arhgap44;Rgs14;Srgap2;Arhgap35;Rap1gap;Grpel1;Gdi1;Rabgap1;Thy1;Rasgrf1
rno05034	Alcoholism	http://www.kegg.jp/kegg-bin/show_pathway?rno05034+100910200+114117+116590+170851+24400+24408+24668+25636+25686+25750+29253+29384+365877+50663+50664+80850+81504+81664+83579+84581	175	20	7.58295	2.63749	7.22923e-05	0.000475227	100910200;114117;116590;170851;24400;24408;24668;25636;25686;25750;29253;29384;365877;50663;50664;80850;81504;81664;83579;84581	pathway_KEGG	Ppp1ca;Gnb5;Calm2;Grin1;Gnai2;Grb2;Hist2h2aa3;Gnb1;Prkaca;Hdac6;Gnai1;LOC100910200;H2afy;Map2k1;Gnao1;Mapk1;Gng3;Gng2;Maoa;Maob
GO:0016651	oxidoreductase activity, acting on NAD(P)H	http://amigo.geneontology.org/amigo/term/GO:0016651	63	11	2.72986	4.02951	7.33029e-05	0.000476851	25035;25488;117533;293991;295923;298942;299739;304805;310378;361385;362440	geneontology_Molecular_Function_noRedundant	Dld;Ndufb8;Ndufa5;Nnt;Gmpr;Ndufa9;Ndufa12;Cyb5r1;Ndufb7;Cyb5r3;Ndufs3
rno05230	Central carbon metabolism in cancer	http://www.kegg.jp/kegg-bin/show_pathway?rno05230+116590+170851+24398+24642+25630+25741+289950+56718+60416+64030+65152	63	11	2.72986	4.02951	7.33029e-05	0.000476851	116590;170851;24398;24642;25630;25741;289950;56718;60416;64030;65152	pathway_KEGG	Pfkl;Pkm;Pfkm;Pgam1;Kit;Map2k1;Pfkp;Mapk1;Pdhb;Gls;Mtor
GO:0010256	endomembrane system organization	http://amigo.geneontology.org/amigo/term/GO:0010256	262	26	11.3528	2.29019	7.39753e-05	0.000478731	25751;29167;54241;56042;58817;59267;60431;64060;64465;83572;83765;83809;84599;85238;114514;116590;140945;170851;288779;289400;291750;296654;303606;307039;314633;362750	geneontology_Biological_Process_noRedundant	Clasp2;Rab5b;Rtn4;Dctn1;Atl1;Uso1;Cltc;Synj1;Sec23a;Trappc8;Syt7;Gsn;Vapb;Map2k1;Ap3d1;Cdc42;Mapk1;Ccdc47;Nsfl1c;Dnm2;Rab18;Vps33b;Camsap2;Pafah1b1;Tmed10;Rtn3
rno05020	Prion diseases	http://www.kegg.jp/kegg-bin/show_pathway?rno05020+116590+170851+192277+24586+24686+25150+25636+293508	34	8	1.47326	5.43014	7.94634e-05	0.000510414	116590;170851;192277;24586;24686;25150;25636;293508	pathway_KEGG	Ncam1;Prkaca;Stip1;Fyn;Prnp;Prkacb;Map2k1;Mapk1
GO:0008047	enzyme activator activity	http://amigo.geneontology.org/amigo/term/GO:0008047	309	29	13.3893	2.1659	7.96883e-05	0.000510414	24832;25183;25728;29614;58817;64310;65248;79563;81022;83579;114705;116643;116645;117287;192213;207119;286993;289350;291624;303222;306400;310533;311193;311911;313644;360739;360840;681996;100361417	geneontology_Molecular_Function_noRedundant	Rab3gap2;Stxbp5;Rin1;Arhgap1;Gnb5;Park7;Ranbp1;Lars;Ahsa1;Apoe;Sec23a;Tbcd;Rapgef2;Taok1;Arhgap44;Plaa;Rgs14;Srgap2;Arf1;Arhgap35;Psme2;Rap1gap;Grpel1;Gdi1;Rabgap1;Vcp;Thy1;Prkaa1;Rasgrf1
GO:0033218	amide binding	http://amigo.geneontology.org/amigo/term/GO:0033218	279	27	12.0894	2.23336	8.31717e-05	0.000530007	24213;24408;24423;24426;24686;25045;25104;25673;25728;26759;29409;29525;29627;50671;54241;63864;64202;81815;114515;116563;170670;171155;298942;300666;301252;306182;361967	geneontology_Molecular_Function_noRedundant	Dbi;Fasn;Grin1;Anxa5;Tpp2;Hsp90ab1;Cltc;Ppid;Gstp1;Dld;Apoe;Ap2m1;Acot7;Pc;Prnp;Hadha;Mag;Lancl1;C2cd2l;Gria2;Calr;Atp1a3;Gstm1;Pitpna;Hadhb;Hsd17b10;Ipo5
GO:0031225	anchored component of membrane	http://amigo.geneontology.org/amigo/term/GO:0031225	111	15	4.80976	3.11866	8.68768e-05	0.000549641	24380;24686;24832;29495;50864;58920;64053;79434;83764;94197;117258;287709;288700;288779;306460	geneontology_Cellular_Component_noRedundant	Dlg2;Rab5c;Flot2;Rab5b;Rab11b;Prnp;Ntm;Gad2;Cntn1;Gpc1;Dlg4;Rab14;Thy1;Enpp6;Rab35
GO:0005815	microtubule organizing center	http://amigo.geneontology.org/amigo/term/GO:0005815	472	39	20.4523	1.90688	8.71328e-05	0.000549641	25023;25498;25537;25686;25751;29167;54319;64465;81655;81664;83572;83809;114514;114705;114764;116590;117103;117550;170714;170851;191575;289400;291969;293508;294864;296488;298848;299850;304859;306400;313658;314212;316333;360739;360850;361532;362084;501083;100361417	geneontology_Cellular_Component_noRedundant	Pdcd6ip;Clasp2;Dctn1;Ranbp1;Gnai2;Actr1b;Rab8a;Dynlrb1;Cct5;Sirt2;Tbcd;Mapre1;Nme1;Prkacb;Gnai1;Prkcb;Dhx9;Rock2;Map2k1;Rgs14;Ubr4;Atp6v0d1;Daam1;Arhgap35;Cdc42;Kif5b;Mapk1;Dctn2;Ola1;Ezr;Rabl6;Mapre3;Nsfl1c;Dnm2;Nek7;Npm1;Dync1li2;Camsap2;Pafah1b1
GO:0043279	response to alkaloid	http://amigo.geneontology.org/amigo/term/GO:0043279	137	17	5.93637	2.8637	8.95923e-05	0.000562316	24586;24681;25639;25721;25751;29546;50646;50664;56718;65179;65248;84599;140908;289693;292804;301252;364052	geneontology_Biological_Process_noRedundant	Fkbp1a;Ncam1;Prkcg;Homer1;Ptk2b;Ppp5c;Hsp90ab1;Gnao1;Dhx15;Got2;Pea15;Cdk5;Dnm2;Prkaa1;Mtor;Tmed10;Gpi
GO:0005875	microtubule associated complex	http://amigo.geneontology.org/amigo/term/GO:0005875	99	14	4.28979	3.26357	9.01236e-05	0.000562822	25152;29167;29489;29753;64862;81655;83572;117550;170714;290640;299850;309159;316333;363288	geneontology_Cellular_Component_noRedundant	Dctn1;Dync1h1;Ywhae;Actr1b;Dynlrb1;Klc2;Map1a;Kif1a;Kif5b;Dctn2;Map1s;Map1lc3b;Dync1li2;Pafah1b1
rno01212	Fatty acid metabolism	http://www.kegg.jp/kegg-bin/show_pathway?rno01212+113965+113976+117243+140547+170670+171155+25014+25288+29411+50671	54	10	2.33988	4.27372	9.27114e-05	0.000576102	113965;113976;117243;140547;170670;171155;25014;25288;29411;50671	pathway_KEGG	Ppt1;Fasn;Acat1;Acsl1;Hadha;Acsl4;Acsl6;Echs1;Hadh;Hadhb
rno04910	Insulin signaling pathway	http://www.kegg.jp/kegg-bin/show_pathway?rno04910+116590+170851+24668+24701+25636+25725+25739+293508+361042+50663+50671+54245+56718+64632+65248+81504+83764	138	17	5.9797	2.84295	9.81531e-05	0.000603399	116590;170851;24668;24701;25636;25725;25739;293508;361042;50663;50671;54245;56718;64632;65248;81504;83764	pathway_KEGG	Ppp1ca;Flot2;Fasn;Pck2;Calm2;Grb2;Prkar1a;Prkaca;Pygb;Exoc7;Prkacb;Map2k1;Pygm;Crk;Mapk1;Prkaa1;Mtor
GO:0009055	electron transfer activity	http://amigo.geneontology.org/amigo/term/GO:0009055	65	11	2.81653	3.90552	9.8494e-05	0.000603399	25282;64001;94194;157074;289217;292845;298544;298942;299739;300047;362776	geneontology_Molecular_Function_noRedundant	Cyb5a;Glrx5;Cyc1;Dld;Sh3bgrl3;Sdha;Sdhc;Cox6a1;Cox5b;Ndufa12;Etfb
GO:0043632	modification-dependent macromolecule catabolic process	http://amigo.geneontology.org/amigo/term/GO:0043632	425	36	18.4157	1.95485	9.85536e-05	0.000603399	25490;29545;29669;29675;29676;50646;50686;64624;81827;83806;83809;116643;116645;116725;246302;287155;287280;287670;287772;287984;289990;294708;297593;298012;301252;301555;303606;307641;307821;313658;317381;360471;361258;361532;361970;363445	geneontology_Biological_Process_noRedundant	Sgtb;Cul5;Psma2;Trim2;Usp5;Uchl1;Psmd2;Ptk2b;Psmb2;Psmd12;Hsp90ab1;Nedd8;Psmc6;Rad23b;Pcyox1;Sirt2;Psmd7;Psmd3;Plaa;Ccdc22;Ubr4;Csnk2a2;Psmb3;Usp7;Skp1;Stub1;Cul3;Cul2;Psmd1;Ccdc47;Nsfl1c;Psmc5;Ube2n;Vcp;Usp9x;Gsk3a
rno04916	Melanogenesis	http://www.kegg.jp/kegg-bin/show_pathway?rno04916+116590+170851+171140+24654+24681+25023+25636+25686+293508+302950+50663+50664+64030+81664	100	14	4.33312	3.23093	0.000100701	0.000613541	116590;170851;171140;24654;24681;25023;25636;25686;293508;302950;50663;50664;64030;81664	pathway_KEGG	Plcb1;Calm2;Prkcg;Gnai2;Prkaca;Prkacb;Gnai1;Kit;Prkcb;Map2k1;Adcy9;Gnao1;Mapk1;Camk2g
rno05031	Amphetamine addiction	http://www.kegg.jp/kegg-bin/show_pathway?rno05031+171140+24408+24668+24681+25023+25636+25750+29253+293508+29627+50663	66	11	2.85986	3.84635	0.00011364	0.000689013	171140;24408;24668;24681;25023;25636;25750;29253;293508;29627;50663	pathway_KEGG	Ppp1ca;Calm2;Prkcg;Grin1;Prkaca;Prkacb;Prkcb;Gria2;Camk2g;Maoa;Maob
GO:0051082	unfolded protein binding	http://amigo.geneontology.org/amigo/term/GO:0051082	78	12	3.37983	3.55047	0.000124936	0.00075384	25498;29648;64202;79563;81800;287069;288620;294864;299809;301252;361967;362809	geneontology_Molecular_Function_noRedundant	Cct2;Cct6a;Trap1;Hsp90ab1;Ppid;Cct5;Calr;Nudc;Grpel1;Npm1;St13;Ptges3
GO:1901137	carbohydrate derivative biosynthetic process	http://amigo.geneontology.org/amigo/term/GO:1901137	481	39	20.8423	1.8712	0.000129815	0.000779516	24642;24654;25014;25288;25630;25741;26759;26956;29223;29562;54241;60416;60666;65152;65248;81530;81654;83782;94194;113976;116643;117243;117272;170851;171053;191575;289950;292804;296849;298942;300036;300047;300741;302950;303179;308578;313231;315150;100359982	geneontology_Biological_Process_noRedundant	Plcb1;Pfkl;Acat1;Prpsap2;Pdk2;Pkm;Pfkm;Gpd1;Acsl1;Pgam1;Cyc1;Cltc;Dld;Pank4;Acot7;Prps1;Nme1;Acsl4;Acsl6;Guk1;Map2k1;Pfkp;Ak4;Nme2;Adsl;Mpc2;Tsta3;Adcy9;Mpi;Dlat;Ap2a1;Cox5b;Ak3;Alg2;Pdhb;Vcp;Prkaa1;Pdk3;Gpi
rno04015	Rap1 signaling pathway	http://www.kegg.jp/kegg-bin/show_pathway?rno04015+114705+116590+170851+171337+24408+24654+24681+25023+25686+302950+310533+313494+313644+315776+366608+50663+50664+54245+64030+64303+64465+81664	213	22	9.22954	2.38365	0.0001461	0.000873104	114705;116590;170851;171337;24408;24654;24681;25023;25686;302950;310533;313494;313644;315776;366608;50663;50664;54245;64030;64303;64465;81664	pathway_KEGG	Plcb1;Rap1b;Calm2;Pfn1;Prkcg;Grin1;Gnai2;Tln2;Rapgef2;Gnai1;Kit;Prkcb;Map2k1;Rgs14;Dock4;Crk;Cdc42;Adcy9;Gnao1;Mapk1;Rap1gap;Tln1
GO:0008180	COP9 signalosome	http://amigo.geneontology.org/amigo/term/GO:0008180	20	6	0.866623	6.92342	0.000148886	0.000877321	81504;261736;301252;309557;312710;360915	geneontology_Cellular_Component_noRedundant	Grb2;Cops4;Hsp90ab1;Epb41l2;Cops2;Cops7a
GO:0097718	disordered domain specific binding	http://amigo.geneontology.org/amigo/term/GO:0097718	20	6	0.866623	6.92342	0.000148886	0.000877321	24392;25150;54319;116563;290652;301252	geneontology_Molecular_Function_noRedundant	Fyn;Hsp90ab1;Ap2m1;Gja1;Fkbp8;Ezr
rno04714	Thermogenesis	http://www.kegg.jp/kegg-bin/show_pathway?rno04714+113976+117243+157074+25282+25288+25488+25636+289217+29254+293508+293991+295923+299739+300047+301123+302950+315167+361385+362440+56718+65248+681418+81504+94194	243	24	10.5295	2.27932	0.000148913	0.000877321	113976;117243;157074;25282;25288;25488;25636;289217;29254;293508;293991;295923;299739;300047;301123;302950;315167;361385;362440;56718;65248;681418;81504;94194	pathway_KEGG	Ndufa6;Mgll;Grb2;Prkaca;Acsl1;Ndufa11;Cyc1;Sdha;Sdhc;Prkacb;Ndufb8;Acsl4;Acsl6;Ndufa5;Adcy9;Cox6a1;Ndufa9;Cox5b;Ndufa12;Ndufb7;Prkaa1;Mtor;Ndufs3;Ndufb10
rno00071	Fatty acid degradation	http://www.kegg.jp/kegg-bin/show_pathway?rno00071+113965+113976+117243+140547+170670+171155+25014+25288+65183	47	9	2.03656	4.41921	0.000158426	0.000924644	113965;113976;117243;140547;170670;171155;25014;25288;65183	pathway_KEGG	Acat1;Acsl1;Hadha;Acsl4;Aldh3a2;Acsl6;Echs1;Hadh;Hadhb
rno00380	Tryptophan metabolism	http://www.kegg.jp/kegg-bin/show_pathway?rno00380+113965+140547+170670+24248+25014+25750+29253+360975+65183	47	9	2.03656	4.41921	0.000158426	0.000924644	113965;140547;170670;24248;25014;25750;29253;360975;65183	pathway_KEGG	Acat1;Ogdh;Hadha;Aldh3a2;Echs1;Hadh;Cat;Maoa;Maob
GO:0022411	cellular component disassembly	http://amigo.geneontology.org/amigo/term/GO:0022411	245	24	10.6161	2.26071	0.000168801	0.000980619	25152;25230;29167;64159;64862;79215;83572;85238;114114;114514;116643;117550;140673;140908;287444;289400;291245;296654;310635;313409;360950;502674;683788;684352	geneontology_Biological_Process_noRedundant	Dnm1l;Clasp2;Add3;Actn2;Dctn1;Sptan1;Mtpn;Eif5a;Twf2;Dstn;Synj1;Wdr1;Gsn;Dnajc6;Napa;Map1a;Fscn1;Kif5b;Cdk5;Vcp;Map1lc3b;Camsap2;Pafah1b1;Arhgef2
GO:0072347	response to anesthetic	http://amigo.geneontology.org/amigo/term/GO:0072347	105	14	4.54977	3.07708	0.000171346	0.000990792	24586;24681;25721;25751;29177;29546;50646;50664;56718;65179;140908;292804;301252;364052	geneontology_Biological_Process_noRedundant	Ncam1;Prkcg;Homer1;Ptk2b;Ppp5c;Hsp90ab1;Hpca;Gnao1;Got2;Pea15;Cdk5;Dnm2;Mtor;Gpi
GO:0001505	regulation of neurotransmitter levels	http://amigo.geneontology.org/amigo/term/GO:0001505	292	27	12.6527	2.13393	0.000177739	0.00102302	24380;24681;24923;25528;25558;25750;25751;26989;29340;29411;29482;29483;50646;56718;59267;64829;85238;114114;116638;117556;140667;140673;140908;171337;298771;306460;309207	geneontology_Biological_Process_noRedundant	Dnm1l;Sirpa;Ppt1;Prepl;Rap1b;Prkce;Stxbp1;Cadps;Prkcg;Ptk2b;Ap3m2;Synj1;Unc13a;Syt7;Sv2b;Napa;Gad2;Slc1a2;Slc1a3;Slc17a7;Cdk5;Stx1b;Dnm2;Enpp6;Mtor;Dagla;Maob
GO:0043954	cellular component maintenance	http://amigo.geneontology.org/amigo/term/GO:0043954	38	8	1.64658	4.85854	0.000183637	0.00105212	24408;24686;25150;25479;29495;29546;58948;65040	geneontology_Biological_Process_noRedundant	Vps35;Dlgap1;Dlg3;Homer1;Grin1;Fyn;Prnp;Dlg4
GO:1905360	GTPase complex	http://amigo.geneontology.org/amigo/term/GO:1905360	29	7	1.2566	5.57057	0.00018819	0.00107105	24400;25686;25740;50664;81664;83579;114117	geneontology_Cellular_Component_noRedundant	Gnb5;Gnaz;Gnai2;Gnb1;Gnai1;Gnao1;Gng3
GO:0006839	mitochondrial transport	http://amigo.geneontology.org/amigo/term/GO:0006839	132	16	5.71971	2.79734	0.000188655	0.00107105	25274;25275;25479;29483;50686;65248;79563;94194;171116;266777;294560;300047;300111;312890;502749;100359982	geneontology_Biological_Process_noRedundant	Vps35;Opa1;Cyc1;Samm50;Agk;Mpc2;Nptx1;Mcu;Slc1a3;Cnp;Gdap1;Tst;Grpel1;Cox5b;Prkaa1;Gsk3a
GO:1902115	regulation of organelle assembly	http://amigo.geneontology.org/amigo/term/GO:1902115	119	15	5.15641	2.909	0.000192144	0.00108103	25498;25529;25751;29423;29489;54319;65248;83532;266777;289350;296654;306400;310635;310710;683788	geneontology_Biological_Process_noRedundant	Rab3gap2;Dync1h1;Gap43;Sec22b;Gsn;Ptprs;Nptx1;Arhgap35;Fscn1;Ezr;Dnm2;Npm1;Prkaa1;Vdac3;Arhgef2
GO:0030055	cell-substrate junction	http://amigo.geneontology.org/amigo/term/GO:0030055	119	15	5.15641	2.909	0.000192144	0.00108103	29154;50646;54319;81732;83782;114559;114764;116590;170851;289992;291245;294568;296654;313494;314641	geneontology_Cellular_Component_noRedundant	Actn2;Actr3;Ptk2b;Capn2;Mapre1;Pip5k1c;Gsn;Arhgef7;Map2k1;Nme2;Fermt2;Mapk1;Wasf1;Ezr;Tln1
GO:0097440	apical dendrite	http://amigo.geneontology.org/amigo/term/GO:0097440	21	6	0.909954	6.59374	0.000200849	0.00112494	25595;29647;50646;64351;84390;192213	geneontology_Cellular_Component_noRedundant	Cask;Ptk2b;Ykt6;Map2;Hcn1;Rasgrf1
rno00051	Fructose and mannose metabolism	http://www.kegg.jp/kegg-bin/show_pathway?rno00051+24192+24788+25741+296972+300036+300741+60416+65152	39	8	1.68992	4.73396	0.00022236	0.00123986	24192;24788;25741;296972;300036;300741;60416;65152	pathway_KEGG	Pfkl;Pfkm;Akr1b10;Pfkp;Tsta3;Akr1b1;Mpi;Sord
GO:0017124	SH3 domain binding	http://amigo.geneontology.org/amigo/term/GO:0017124	83	12	3.59649	3.33659	0.00022873	0.0012697	24392;25528;25751;29340;54245;81504;84008;85238;89816;114515;282587;501083	geneontology_Molecular_Function_noRedundant	Sirpa;Pdcd6ip;Cttnbp2;Picalm;Prkce;Grb2;Synj1;Gja1;Lancl1;Crk;Dnm2;Cntnap1
GO:0031594	neuromuscular junction	http://amigo.geneontology.org/amigo/term/GO:0031594	60	10	2.59987	3.84635	0.000231168	0.00127756	24923;25252;25725;29340;29495;58948;64053;64829;81022;140908	geneontology_Cellular_Component_noRedundant	Dlg2;Stxbp5;Dlg3;Prkce;Prkar1a;Unc13a;Dlg1;Dlg4;Cdk5;Stx1b
GO:0031072	heat shock protein binding	http://amigo.geneontology.org/amigo/term/GO:0031072	96	13	4.15979	3.12516	0.00024797	0.00136438	25639;54241;65179;81800;117282;140908;192277;287155;294708;301252;361967;362809;681996	geneontology_Molecular_Function_noRedundant	Sgtb;Fkbp1a;Ppp5c;Ahsa1;Stip1;Hsp90ab1;Cltc;Ppid;Hnrnpk;Stub1;Cdk5;St13;Ptges3
rno05132	Salmonella infection	http://www.kegg.jp/kegg-bin/show_pathway?rno05132+116590+25537+294568+29489+297518+301511+309159+64303+64465+682507+81655+81824	84	12	3.63982	3.29687	0.000256538	0.00140533	116590;25537;294568;29489;297518;301511;309159;64303;64465;682507;81655;81824	pathway_KEGG	Arpc1a;Pfn1;Dync1h1;Wasl;Arpc4;Arpc2;Rock2;Klc2;Cdc42;Mapk1;Wasf1;Dync1li2
rno04141	Protein processing in endoplasmic reticulum	http://www.kegg.jp/kegg-bin/show_pathway?rno04141+100362805+116643+116645+287155+287280+29154+293721+295461+298012+299331+301252+363332+58817+64202+83725+83809+84026+93646	164	18	7.10631	2.53296	0.000271967	0.00148335	100362805;116643;116645;287155;287280;29154;293721;295461;298012;299331;301252;363332;58817;64202;83725;83809;84026;93646	pathway_KEGG	Dnaja2;Ganab;Hsp90aa1;Hsp90ab1;Ubxn6;Rad23b;Sec23a;Capn2;Sec31a;Plaa;Calr;Skp1;Stub1;Txndc5;Wfs1;Nsfl1c;Sec24b;Vcp
GO:0016853	isomerase activity	http://amigo.geneontology.org/amigo/term/GO:0016853	124	15	5.37306	2.7917	0.000303323	0.001635	24642;25639;79244;288912;290652;292804;293829;298066;300036;300741;305177;361967;362809;681913;100362805	geneontology_Molecular_Function_noRedundant	Fkbp1a;Pgam1;Ppid;Fkbp8;Enoph1;Tsta3;Mpi;Txndc5;Hsd17b4;Mri1;Gstz1;Mcee;Ptges3;Erp44;Gpi
GO:0042391	regulation of membrane potential	http://amigo.geneontology.org/amigo/term/GO:0042391	334	29	14.4726	2.00379	0.000304457	0.001635	24213;24392;24408;24418;24766;24923;25576;29340;29495;29627;29715;29753;50646;65178;65180;81653;84008;84390;116638;116643;117287;117550;140908;171297;291245;298942;310378;360950;361967	geneontology_Biological_Process_noRedundant	Nlgn3;Actn2;Prkce;Snap91;Grin1;Park7;Ywhae;Ptk2b;Ywhah;Ppid;Dbn1;Dld;Wdr1;Gja1;Kcnd2;Nnt;Slc8a1;Gria2;Scn2a;Atp1a3;Kif5b;Dlg4;Hcn1;Grm5;Slc17a7;Cdk5;Stx1b;Vcp;Cntnap1
GO:0097581	lamellipodium organization	http://amigo.geneontology.org/amigo/term/GO:0097581	62	10	2.68653	3.72227	0.000304978	0.001635	25751;56718;64030;64465;81732;114559;294568;308666;683788;684352	geneontology_Biological_Process_noRedundant	Actr3;Twf2;Cyfip1;Kit;Arhgef7;Fscn1;Cdc42;Wasf1;Dnm2;Mtor
GO:1901657	glycosyl compound metabolic process	http://amigo.geneontology.org/amigo/term/GO:1901657	98	13	4.24645	3.06138	0.000305008	0.001635	24192;25604;26956;29223;29562;83782;117272;171116;191575;288912;303179;305177;100363253	geneontology_Biological_Process_noRedundant	Pcmt1;Prpsap2;Opa1;Nt5c2;Prps1;Nme1;Guk1;Ak4;Nme2;Enoph1;Akr1b1;Ak3;Mri1
rno04216	Ferroptosis	http://www.kegg.jp/kegg-bin/show_pathway?rno04216+113976+117243+24686+25288+29328+50567+64862+83532	41	8	1.77658	4.50304	0.000319927	0.00170764	113976;117243;24686;25288;29328;50567;64862;83532	pathway_KEGG	Acsl1;Prnp;Acsl4;Acsl6;Gpx4;Slc3a2;Map1lc3b;Vdac3
GO:0097386	glial cell projection	http://amigo.geneontology.org/amigo/term/GO:0097386	23	6	0.996617	6.02037	0.000346952	0.00184401	24192;24416;24418;25150;54319;361532	geneontology_Cellular_Component_noRedundant	Fyn;Sirt2;Akr1b1;Ezr;Grm5;Grm3
GO:0098685	Schaffer collateral - CA1 synapse	http://amigo.geneontology.org/amigo/term/GO:0098685	63	10	2.72986	3.66319	0.000348691	0.0018454	24586;25150;29627;64303;64465;65178;81022;89816;117277;140908	geneontology_Cellular_Component_noRedundant	Stxbp5;Picalm;Snap91;Ncam1;Pfn1;Fyn;Epn1;Gria2;Cdc42;Cdk5
rno04024	cAMP signaling pathway	http://www.kegg.jp/kegg-bin/show_pathway?rno04024+116590+170851+171140+171337+24213+24214+24215+24408+24668+25537+25636+25686+293508+29598+29627+302950+365355+50663+81664+83633	197	20	8.53624	2.34295	0.000361621	0.00189403	116590;170851;171140;171337;24213;24214;24215;24408;24668;25537;25636;25686;293508;29598;29627;302950;365355;50663;81664;83633	pathway_KEGG	Atp2b1;Ppp1ca;Rap1b;Calm2;Grin1;Atp2b2;Gnai2;Prkaca;Prkacb;Gnai1;Rock2;Map2k1;Rras2;Gria2;Atp1a3;Adcy9;Mapk1;Atp1b2;Camk2g;Gabbr2
rno00500	Starch and sucrose metabolism	http://www.kegg.jp/kegg-bin/show_pathway?rno00500+24645+24701+25739+288333+289827+292804+362029	32	7	1.3866	5.04833	0.000362428	0.00189403	24645;24701;25739;288333;289827;292804;362029	pathway_KEGG	Agl;Gbe1;Pygb;Pygm;Ugp2;Pgm1;Gpi
rno00640	Propanoate metabolism	http://www.kegg.jp/kegg-bin/show_pathway?rno00640+140547+170670+25014+293829+29611+29711+298942	32	7	1.3866	5.04833	0.000362428	0.00189403	140547;170670;25014;293829;29611;29711;298942	pathway_KEGG	Acat1;Dbt;Dld;Hadha;Echs1;Bckdhb;Mcee
GO:0060359	response to ammonium ion	http://amigo.geneontology.org/amigo/term/GO:0060359	141	16	6.10969	2.61879	0.000402622	0.00209531	24586;24681;25721;25751;29546;50646;50664;56718;65179;79256;81664;116590;140908;292804;301252;364052	geneontology_Biological_Process_noRedundant	Ncam1;Prkcg;Homer1;Gnai2;Ptk2b;Ppp5c;Hsp90ab1;Hnrnpd;Gnao1;Mapk1;Got2;Pea15;Cdk5;Dnm2;Mtor;Gpi
GO:0045454	cell redox homeostasis	http://amigo.geneontology.org/amigo/term/GO:0045454	53	9	2.29655	3.91892	0.000408702	0.00211813	29338;94167;296182;298066;298544;298942;310378;362776;100362805	geneontology_Biological_Process_noRedundant	Prdx2;Glrx5;Dld;Sh3bgrl3;Tmx4;Nnt;Prdx6;Txndc5;Erp44
GO:0031400	negative regulation of protein modification process	http://amigo.geneontology.org/amigo/term/GO:0031400	390	32	16.8992	1.89359	0.000416189	0.00214801	24426;24681;24686;24832;25150;25498;25639;25725;29384;29545;29753;54319;56029;56718;65179;65248;81664;83572;114705;116645;117287;140908;192361;266759;287931;290652;293705;310378;314442;360593;361532;497198	geneontology_Biological_Process_noRedundant	Ppm1e;Impact;Fkbp1a;Prkcg;Uchl1;Park7;Ywhae;Gnai2;Prkar1a;Ppp5c;Fyn;Gstp1;Sirt2;Hspa4;Prnp;H2afy;Plaa;Nnt;Rgs14;Ppp1r2;Fkbp8;Wars;Ppm1f;Srcin1;Ezr;Cdk5;Otub1;Thy1;Npm1;Prkaa1;Mtor;Pafah1b1
GO:0050890	cognition	http://amigo.geneontology.org/amigo/term/GO:0050890	215	21	9.3162	2.25414	0.000439167	0.00225728	24213;24399;24408;24586;24654;24681;24686;25613;25742;29411;56718;64030;81672;83572;85238;114705;116638;140908;289820;292804;308666	geneontology_Biological_Process_noRedundant	Plcb1;Ppt1;S100b;Actr2;Ncam1;Prkcg;Grin1;Grm7;Synj1;Cyfip1;Prnp;Kit;Glud1;Rgs14;Atp1a3;Ptprz1;Slc17a7;Cdk5;Mtor;Pafah1b1;Gpi
rno04114	Oocyte meiosis	http://www.kegg.jp/kegg-bin/show_pathway?rno04114+116590+117281+170851+171140+24668+24672+25576+25577+25636+287280+293508+29753+302950+50663	115	14	4.98308	2.80951	0.000446744	0.00228682	116590;117281;170851;171140;24668;24672;25576;25577;25636;287280;293508;29753;302950;50663	pathway_KEGG	Ppp2r1a;Ppp1ca;Calm2;Ywhae;Prkaca;Ywhah;Ppp2ca;Prkacb;Map2k1;Skp1;Adcy9;Mapk1;Camk2g;Ywhaq
GO:0007264	small GTPase mediated signal transduction	http://amigo.geneontology.org/amigo/term/GO:0007264	359	30	15.5559	1.92853	0.000461141	0.00234657	25183;25537;25751;54245;64465;79434;81504;84009;94197;114559;117103;170851;171337;171381;192213;287709;288700;288779;294568;299799;303222;307039;308666;310192;310533;310635;311193;313644;365355;404781	geneontology_Biological_Process_noRedundant	Rab5c;Rab5b;Rap1b;Arhgap1;Grb2;Rab11b;Rab8a;Trio;Cyfip1;Psd;Rapgef2;Arhgap44;Iqsec3;Arhgef7;Rock2;Map2k1;Rras2;Kalrn;Crk;Cdc42;Rap1gap;Wasf1;Gdi1;Rab14;Rab21;Dnm2;Rab18;Rasgrf1;Rab35;Arhgef2
GO:0010959	regulation of metal ion transport	http://amigo.geneontology.org/amigo/term/GO:0010959	294	26	12.7394	2.04092	0.000464585	0.00234657	24392;24408;24686;24832;25045;25150;25252;25576;25639;25751;29177;29272;29340;29546;29715;29738;29753;50646;50664;64310;81664;83579;117258;117550;291245;362013	geneontology_Biological_Process_noRedundant	Actn2;Dbi;Prkce;Gnb5;Fkbp1a;Homer1;Grin1;Ywhae;Gnai2;Ptk2b;Fyn;Ywhah;Prnp;Gja1;Kcnab2;Hpca;Ahcyl1;Cntn1;Slc8a1;Arf1;Kif5b;Dlg1;Gnao1;Dpp6;Dnm2;Thy1
GO:0006575	cellular modified amino acid metabolic process	http://amigo.geneontology.org/amigo/term/GO:0006575	129	15	5.58972	2.6835	0.000465933	0.00234657	24423;24426;24439;24440;25604;29328;64392;117287;246302;288912;305177;361472;499422;681913;108348148	geneontology_Biological_Process_noRedundant	Pcmt1;Park7;Gstp1;Pcyox1;Aldh1l1;Gstt3;Enoph1;Gpx4;Hagh;Hbb;Gstm1;Mthfd1l;Mri1;Gstm3;Gstz1
rno04611	Platelet activation	http://www.kegg.jp/kegg-bin/show_pathway?rno04611+116590+171337+24366+24654+24668+25150+25537+25636+25686+293508+302950+306400+313494+315776+81664	129	15	5.58972	2.6835	0.000465933	0.00234657	116590;171337;24366;24654;24668;25150;25537;25636;25686;293508;302950;306400;313494;315776;81664	pathway_KEGG	Plcb1;Ppp1ca;Rap1b;Gnai2;Prkaca;Fyn;Tln2;Prkacb;Gnai1;Rock2;Arhgap35;Adcy9;Mapk1;Fgb;Tln1
GO:0030900	forebrain development	http://amigo.geneontology.org/amigo/term/GO:0030900	295	26	12.7827	2.034	0.000489192	0.00245382	24213;24586;24654;25150;25275;25291;25613;26956;29647;29715;50664;54245;80841;83572;83765;116549;117282;117550;140908;191575;299858;307641;310533;310698;360840;363288	geneontology_Biological_Process_noRedundant	Plcb1;Rtn4;Cask;Ncam1;Lrp1;Fyn;Csnk2a1;Rapgef2;Nme1;Hnrnpk;Csnk2a2;Srgap2;Dclk2;Slc8a1;Kif1a;Atp1a3;Crk;Kif5b;Gnao1;Cnp;Ptprz1;Ak3;Fabp7;Anxa3;Cdk5;Pafah1b1
rno04922	Glucagon signaling pathway	http://www.kegg.jp/kegg-bin/show_pathway?rno04922+171140+24642+24654+24701+25630+25636+25739+25741+289950+293508+361042+50663+65248	103	13	4.46311	2.91277	0.000498528	0.00249064	171140;24642;24654;24701;25630;25636;25739;25741;289950;293508;361042;50663;65248	pathway_KEGG	Plcb1;Pfkl;Pck2;Calm2;Pkm;Prkaca;Pgam1;Pygb;Prkacb;Pygm;Pdhb;Camk2g;Prkaa1
rno04970	Salivary secretion	http://www.kegg.jp/kegg-bin/show_pathway?rno04970+24213+24214+24215+24654+24681+25023+25636+293508+29598+302950+50663	78	11	3.37983	3.2546	0.000514229	0.00255305	24213;24214;24215;24654;24681;25023;25636;293508;29598;302950;50663	pathway_KEGG	Plcb1;Atp2b1;Calm2;Prkcg;Atp2b2;Prkaca;Prkacb;Prkcb;Atp1a3;Adcy9;Atp1b2
GO:0007584	response to nutrient	http://amigo.geneontology.org/amigo/term/GO:0007584	280	25	12.1327	2.06054	0.000515108	0.00255305	24248;24250;24426;25023;25045;25150;25288;25630;29177;29598;29711;29715;56718;81530;81805;84390;113976;117099;117243;171116;296654;310378;312890;315150;362029	geneontology_Biological_Process_noRedundant	Atp2b1;Dbi;Agl;Pdk2;Pkm;Acsl1;Opa1;Fyn;Gstp1;Cbs;Gsn;Acsl4;Acsl6;Prkcb;Nnt;Hpca;Slc8a1;Adsl;Gdap1;Hcn1;Bdh1;Bckdhb;Mtor;Suox;Cat
GO:0099132	ATP hydrolysis coupled cation transmembrane transport	http://amigo.geneontology.org/amigo/term/GO:0099132	44	8	1.90657	4.19601	0.000529253	0.00261279	24213;24215;25673;29598;291969;297797;299971;685232	geneontology_Biological_Process_noRedundant	Atp2b1;Atp6v1c1;Atp6v1a;Atp2b2;Anxa5;Atp6v0d1;Atp1a3;Atp6v1h
rno04510	Focal adhesion	http://www.kegg.jp/kegg-bin/show_pathway?rno04510+116590+170851+171337+192213+24668+24681+25023+25150+25537+25567+29154+306400+307483+313494+315776+54245+63836+64465+81504+81634	203	20	8.79623	2.2737	0.000533339	0.0026226	116590;170851;171337;192213;24668;24681;25023;25150;25537;25567;29154;306400;307483;313494;315776;54245;63836;64465;81504;81634	pathway_KEGG	Ppp1ca;Rap1b;Prkcg;Actn1;Grb2;Tnr;Fyn;Capn2;Tln2;Prkcb;Rock2;Map2k1;Actn4;Arhgap35;Crk;Cdc42;Mapk1;Diaph1;Tln1;Rasgrf1
rno04932	Non-alcoholic fatty liver disease (NAFLD)	http://www.kegg.jp/kegg-bin/show_pathway?rno04932+157074+25282+25488+289217+293991+295923+299739+300047+301123+315167+361385+362440+50686+64465+65248+681418+94194	159	17	6.88966	2.46747	0.000540576	0.00264776	157074;25282;25488;289217;293991;295923;299739;300047;301123;315167;361385;362440;50686;64465;65248;681418;94194	pathway_KEGG	Ndufa6;Ndufa11;Cyc1;Sdha;Sdhc;Ndufb8;Ndufa5;Cdc42;Cox6a1;Ndufa9;Cox5b;Ndufa12;Ndufb7;Prkaa1;Ndufs3;Gsk3a;Ndufb10
GO:0006457	protein folding	http://amigo.geneontology.org/amigo/term/GO:0006457	131	15	5.67638	2.64253	0.000549275	0.00267986	25639;29648;64202;79563;81800;287069;288620;294708;294864;298066;299809;301252;361967;362809;100361417	geneontology_Biological_Process_noRedundant	Sgtb;Cct2;Fkbp1a;Cct6a;Trap1;Hsp90ab1;Ppid;Cct5;Tbcd;Calr;Nudc;Grpel1;St13;Ptges3;Erp44
GO:0070161	anchoring junction	http://amigo.geneontology.org/amigo/term/GO:0070161	219	21	9.48953	2.21297	0.000560862	0.00272575	24392;24668;29154;50646;54319;81732;83764;83782;114559;114764;116590;170851;289992;291245;294568;296654;313494;314432;314641;500988;100361417	geneontology_Cellular_Component_noRedundant	Ppp1ca;Flot2;Actn2;Actr3;Ptk2b;Tbcd;Capn2;Mapre1;Gja1;Pip5k1c;Gsn;Arhgef7;Map2k1;Nme2;Fermt2;Mapk1;Uba1;Wasf1;Ezr;Ddx6;Tln1
GO:0021700	developmental maturation	http://amigo.geneontology.org/amigo/term/GO:0021700	189	19	8.18959	2.32002	0.000568001	0.00274974	24392;25558;29495;50646;56718;64053;64303;64829;89816;116638;117281;117282;171116;298942;300674;306332;314633;316009;361532	geneontology_Biological_Process_noRedundant	Dlg2;Ppp2r1a;Picalm;Stxbp1;Pfn1;Ptk2b;Plxnb1;Opa1;Dld;Unc13a;Sirt2;Gja1;Hnrnpk;Ap1m1;Ap3d1;Arcn1;Dlg4;Slc17a7;Mtor
GO:0034330	cell junction organization	http://amigo.geneontology.org/amigo/term/GO:0034330	161	17	6.97632	2.43682	0.000624197	0.00301013	24392;24832;50646;63836;64465;84008;171337;287931;289992;291245;310533;313494;360950;362587;501083;683788;100361417	geneontology_Biological_Process_noRedundant	Pdcd6ip;Macf1;Actn2;Rap1b;Ptk2b;Tbcd;Wdr1;Gja1;Rapgef2;Actn4;Fermt2;Fscn1;Cdc42;Ppm1f;Cntnap1;Thy1;Tln1
rno00250	Alanine, aspartate and glutamate metabolism	http://www.kegg.jp/kegg-bin/show_pathway?rno00250+24380+24398+24399+25612+25721+315150+85309	35	7	1.51659	4.61562	0.000646786	0.00310706	24380;24398;24399;25612;25721;315150;85309	pathway_KEGG	Folh1;Asns;Glud1;Gad2;Adsl;Got2;Gls
rno04014	Ras signaling pathway	http://www.kegg.jp/kegg-bin/show_pathway?rno04014+114117+116590+170851+171337+171455+192213+207119+24400+24408+24681+25023+25636+287709+288779+293508+365355+50663+64030+64465+80850+81504+83579	238	22	10.3128	2.13327	0.000689143	0.00328643	114117;116590;170851;171337;171455;192213;207119;24400;24408;24681;25023;25636;287709;288779;293508;365355;50663;64030;64465;80850;81504;83579	pathway_KEGG	Rab5c;Rab5b;Rap1b;Rin1;Gnb5;Calm2;Exoc2;Prkcg;Grin1;Grb2;Gnb1;Prkaca;Prkacb;Kit;Prkcb;Map2k1;Rras2;Cdc42;Mapk1;Gng3;Gng2;Rasgrf1
GO:0071241	cellular response to inorganic substance	http://amigo.geneontology.org/amigo/term/GO:0071241	192	19	8.31958	2.28377	0.000689387	0.00328643	24408;24586;24686;25673;25751;29177;50686;54245;59267;64202;65179;65248;79256;116590;266777;296654;317385;361433;367160	geneontology_Biological_Process_noRedundant	Cpne7;Ncam1;Grin1;Anxa5;Ppp5c;Syt7;Prnp;Gsn;Fus;Hpca;Hnrnpd;Nptx1;Calr;Crk;Mapk1;Dnm2;Cpne4;Prkaa1;Gsk3a
GO:0030507	spectrin binding	http://amigo.geneontology.org/amigo/term/GO:0030507	26	6	1.12661	5.32571	0.000708221	0.00336338	24400;25230;64159;64829;289400;309557	geneontology_Molecular_Function_noRedundant	Add3;Sptan1;Gnb1;Unc13a;Epb41l2;Camsap2
GO:0031329	regulation of cellular catabolic process	http://amigo.geneontology.org/amigo/term/GO:0031329	454	35	19.6723	1.77915	0.000715721	0.00338612	24668;24681;25045;25479;29614;29677;50646;54319;56718;60666;64189;65040;65248;79256;81827;114114;116643;117103;117262;170851;171350;287155;289350;289990;291624;297593;298012;299858;301252;304859;307641;310378;310710;317381;361532	geneontology_Biological_Process_noRedundant	Rab3gap2;Dnm1l;Ppp1ca;Vps35;Dlgap1;Dbi;Prkcg;Usp5;Lars;Ptk2b;Gpd1;Psmc3;Rab8a;Lrp1;Hsp90ab1;Psmc6;Rad23b;Sirt2;Pafah1b2;Sec22b;Dhx9;Nnt;Map2k1;Ccdc22;Csnk2a2;Psmc4;Hnrnpd;Stub1;Psme2;Ezr;Pabpc1;Psmc5;Vcp;Prkaa1;Mtor
rno04912	GnRH signaling pathway	http://www.kegg.jp/kegg-bin/show_pathway?rno04912+116590+170851+171140+24654+25023+25636+293508+302950+50646+50663+64465+81504	94	12	4.07313	2.94614	0.000731524	0.00344783	116590;170851;171140;24654;25023;25636;293508;302950;50646;50663;64465;81504	pathway_KEGG	Plcb1;Calm2;Grb2;Ptk2b;Prkaca;Prkacb;Prkcb;Map2k1;Cdc42;Adcy9;Mapk1;Camk2g
GO:0051087	chaperone binding	http://amigo.geneontology.org/amigo/term/GO:0051087	69	10	2.98985	3.34465	0.000734853	0.00345049	24366;24686;79563;81800;83579;192277;287155;294708;362809;681996	geneontology_Molecular_Function_noRedundant	Sgtb;Gnb5;Ahsa1;Stip1;Prnp;Stub1;Grpel1;Fgb;St13;Ptges3
rno04072	Phospholipase D signaling pathway	http://www.kegg.jp/kegg-bin/show_pathway?rno04072+116590+170851+24416+24418+24654+25150+25751+302950+314641+365355+50646+56718+64030+64310+81504+81672	149	16	6.45634	2.47818	0.000743001	0.00347569	116590;170851;24416;24418;24654;25150;25751;302950;314641;365355;50646;56718;64030;64310;81504;81672	pathway_KEGG	Plcb1;Grb2;Ptk2b;Grm7;Fyn;Pip5k1c;Kit;Map2k1;Rras2;Arf1;Adcy9;Mapk1;Grm5;Dnm2;Mtor;Grm3
GO:0051169	nuclear transport	http://amigo.geneontology.org/amigo/term/GO:0051169	209	20	9.05621	2.20843	0.000771733	0.00359051	25498;29236;29753;64202;79256;81743;85252;114705;116590;117287;140908;287444;301252;304859;306182;307039;308939;362013;362273;362361	geneontology_Biological_Process_noRedundant	Pde2a;Hnrnpa2b1;Park7;Ywhae;Eif5a;Hsp90ab1;Xpo1;Dhx9;Rgs14;Rpsa;Ahcyl1;Hnrnpd;Calr;Mapk1;Ipo7;Cse1l;Cdk5;Rab18;Npm1;Ipo5
GO:0016903	oxidoreductase activity, acting on the aldehyde or oxo group of donors	http://amigo.geneontology.org/amigo/term/GO:0016903	36	7	1.55992	4.4874	0.000773297	0.00359051	24192;29711;64392;65183;81654;289950;298942	geneontology_Molecular_Function_noRedundant	Dld;Aldh3a2;Aldh1l1;Akr1b1;Dlat;Bckdhb;Pdhb
GO:0005911	cell-cell junction	http://amigo.geneontology.org/amigo/term/GO:0005911	321	27	13.9093	1.94115	0.00078979	0.00365351	24192;24392;24668;24681;25673;29715;58948;63836;64030;80841;81504;81653;81732;83764;84008;116724;171337;310533;310635;314432;315215;360950;361532;500988;501083;683788;100361417	geneontology_Cellular_Component_noRedundant	Pdcd6ip;Ppp1ca;Flot2;Rap1b;Epb41l3;Dlg3;Actr3;Prkcg;Grb2;Anxa5;Dbn1;Sirt2;Tbcd;Wdr1;Gja1;Rapgef2;Kit;Actn4;Slc8a1;Fscn1;Akr1b1;Uba1;Fabp7;Ddx6;Cntnap1;Mlc1;Arhgef2
rno04071	Sphingolipid signaling pathway	http://www.kegg.jp/kegg-bin/show_pathway?rno04071+116590+117281+170851+24654+24672+24681+25023+25150+25537+25686+29340+81664+83537+84431	122	14	5.2864	2.6483	0.000813033	0.00374715	116590;117281;170851;24654;24672;24681;25023;25150;25537;25686;29340;81664;83537;84431	pathway_KEGG	Plcb1;Ppp2r1a;Prkce;Prkcg;Gnai2;Fyn;Ppp2ca;Gnai1;Prkcb;Rock2;Map2k1;Asah1;Mapk1;Smpd2
GO:0008066	glutamate receptor activity	http://amigo.geneontology.org/amigo/term/GO:0008066	27	6	1.16994	5.12846	0.000877577	0.00402975	24408;24416;24418;29627;50646;81672	geneontology_Molecular_Function_noRedundant	Grin1;Ptk2b;Grm7;Gria2;Grm5;Grm3
GO:0048770	pigment granule	http://amigo.geneontology.org/amigo/term/GO:0048770	71	10	3.07651	3.25043	0.000923414	0.00422471	25275;29753;50567;50671;54241;84599;288700;301252;310710;501083	geneontology_Cellular_Component_noRedundant	Pdcd6ip;Fasn;Ywhae;Hsp90ab1;Cltc;Sec22b;Cnp;Slc3a2;Rab35;Tmed10
rno04022	cGMP-PKG signaling pathway	http://www.kegg.jp/kegg-bin/show_pathway?rno04022+116590+170851+24213+24214+24215+24654+24668+25537+25686+29340+29598+29715+302950+50663+81664+81743+83532	167	17	7.2363	2.34927	0.000944788	0.00430672	116590;170851;24213;24214;24215;24654;24668;25537;25686;29340;29598;29715;302950;50663;81664;81743;83532	pathway_KEGG	Plcb1;Atp2b1;Ppp1ca;Prkce;Pde2a;Calm2;Atp2b2;Gnai2;Gnai1;Rock2;Map2k1;Slc8a1;Atp1a3;Adcy9;Mapk1;Atp1b2;Vdac3
rno00520	Amino sugar and nucleotide sugar metabolism	http://www.kegg.jp/kegg-bin/show_pathway?rno00520+24645+25035+289827+292804+300036+300741+304805+312826	48	8	2.0799	3.84635	0.000967658	0.00439493	24645;25035;289827;292804;300036;300741;304805;312826	pathway_KEGG	Ugp2;Tsta3;Mpi;Cmas;Pgm1;Cyb5r1;Cyb5r3;Gpi
GO:0051235	maintenance of location	http://amigo.geneontology.org/amigo/term/GO:0051235	213	20	9.22954	2.16696	0.000977437	0.00442326	24232;24832;25045;25639;25673;29340;29715;50646;81653;81814;83572;116638;116724;117287;140908;296654;313494;314633;317381;684352	geneontology_Biological_Process_noRedundant	Epb41l3;Dbi;Prkce;Fkbp1a;Park7;Anxa5;Tmsb4x;Ptk2b;Twf2;Dbn1;Gsn;Ccdc22;Slc8a1;Ap3d1;Slc17a7;Cdk5;C3;Thy1;Tln1;Pafah1b1
GO:0016482	cytosolic transport	http://amigo.geneontology.org/amigo/term/GO:0016482	111	13	4.80976	2.70284	0.00101995	0.00458804	25479;25595;54319;59267;64351;94197;116590;117550;170851;289820;299799;309678;363288	geneontology_Biological_Process_noRedundant	Vps35;Actr2;Syt7;Map2k1;Ykt6;Kif1a;Kif5b;Mapk1;Map2;Trappc10;Ezr;Rab14;Rab21
GO:0010563	negative regulation of phosphorus metabolic process	http://amigo.geneontology.org/amigo/term/GO:0010563	377	30	16.3358	1.83645	0.0010212	0.00458804	24426;24686;24832;25498;25639;25725;29177;29384;29545;29753;54319;56029;56718;58948;64053;65179;81664;83572;114705;117287;192361;266759;287931;290652;310378;314442;360593;361532;497198;100910536	geneontology_Biological_Process_noRedundant	Dlg2;Ppm1e;Impact;Dlg3;Fkbp1a;Uchl1;Park7;Ywhae;Gnai2;Prkar1a;Ppp5c;Gstp1;Sirt2;Hspa4;Prnp;H2afy;Nnt;Rgs14;Hpca;Ppp1r2;Fkbp8;Wars;Elfn2;Ppm1f;Srcin1;Ezr;Thy1;Npm1;Mtor;Pafah1b1
GO:0006836	neurotransmitter transport	http://amigo.geneontology.org/amigo/term/GO:0006836	230	21	9.96617	2.10713	0.00105749	0.00473407	24681;24923;25558;25750;26989;29340;29411;29482;29483;59267;64829;85238;114114;116638;117556;140667;140673;140908;171337;298771;613226	geneontology_Biological_Process_noRedundant	Dnm1l;Ppt1;Prepl;Rap1b;Prkce;Stxbp1;Cadps;Prkcg;Ap3m2;Synj1;Unc13a;Syt7;Sv2b;Napa;Slc6a17;Slc1a2;Slc1a3;Slc17a7;Cdk5;Stx1b;Maob
GO:0048284	organelle fusion	http://amigo.geneontology.org/amigo/term/GO:0048284	98	12	4.24645	2.82589	0.00106353	0.00474411	24923;25558;56042;59267;65033;114114;117103;117550;171116;287721;310710;312890	geneontology_Biological_Process_noRedundant	Dnm1l;Stxbp1;Uso1;Opa1;Rab8a;Sec22b;Syt7;Stx12;Kif5b;Vat1;Gdap1;Stx1b
rno00650	Butanoate metabolism	http://www.kegg.jp/kegg-bin/show_pathway?rno00650+113965+117099+140547+170670+24380+25014	28	6	1.21327	4.9453	0.00107648	0.00478479	113965;117099;140547;170670;24380;25014	pathway_KEGG	Acat1;Hadha;Gad2;Echs1;Hadh;Bdh1
GO:0042180	cellular ketone metabolic process	http://amigo.geneontology.org/amigo/term/GO:0042180	140	15	6.06636	2.47265	0.00109975	0.00487089	24192;24439;25045;25721;56718;60666;65248;81530;117287;292804;296849;304542;306840;362440;498909	geneontology_Biological_Process_noRedundant	Coq9;Dbi;Sirt5;Park7;Pdk2;Gpd1;Coq5;Hagh;Akr1b1;Ndufa9;Got2;Prkaa1;Mtor;Pdk3;Gpi
GO:0001764	neuron migration	http://amigo.geneontology.org/amigo/term/GO:0001764	112	13	4.85309	2.67871	0.00110928	0.00489572	24392;25150;25613;54245;60328;83572;116645;140908;306439;310533;310635;360840;363445	geneontology_Biological_Process_noRedundant	Mark2;Fyn;Gja1;Rapgef2;Gpm6a;Plaa;Srgap2;Crk;Ptprz1;Cdk5;Usp9x;Pafah1b1;Arhgef2
GO:0016234	inclusion body	http://amigo.geneontology.org/amigo/term/GO:0016234	49	8	2.12323	3.76785	0.00111333	0.0048963	24686;81827;89816;117262;287155;289990;301252;362029	geneontology_Cellular_Component_noRedundant	Picalm;Agl;Hsp90ab1;Psmc6;Prnp;Psmc4;Stub1;Psmc5
GO:0009896	positive regulation of catabolic process	http://amigo.geneontology.org/amigo/term/GO:0009896	280	24	12.1327	1.97812	0.00116868	0.00512168	24392;25479;29677;50646;54319;60666;64189;65248;79256;81827;116549;116643;117262;170851;171350;287155;289350;289990;297593;299858;310378;310710;317381;361532	geneontology_Biological_Process_noRedundant	Rab3gap2;Vps35;Usp5;Ptk2b;Gpd1;Psmc3;Lrp1;Psmc6;Sirt2;Pafah1b2;Csnk2a1;Sec22b;Gja1;Nnt;Map2k1;Ccdc22;Psmc4;Hnrnpd;Stub1;Ezr;Pabpc1;Psmc5;Vcp;Prkaa1
GO:0043112	receptor metabolic process	http://amigo.geneontology.org/amigo/term/GO:0043112	127	14	5.50306	2.54404	0.00120807	0.0052758	25751;29177;29495;29627;54319;64310;79434;81504;85238;116563;140670;140729;140908;361532	geneontology_Biological_Process_noRedundant	Grb2;Rab11b;Synj1;Ap2m1;Sirt2;Hpca;Gria2;Arf1;Cacng8;Dlg4;Ezr;Ap2b1;Cdk5;Dnm2
GO:0099023	tethering complex	http://amigo.geneontology.org/amigo/term/GO:0099023	50	8	2.16656	3.69249	0.00127598	0.00555296	60627;64465;116654;117515;171455;252881;291750;309678	geneontology_Cellular_Component_noRedundant	Exoc2;Trappc8;Exoc3;Cdc42;Exoc5;Sept2;Trappc10;Exoc4
GO:0032409	regulation of transporter activity	http://amigo.geneontology.org/amigo/term/GO:0032409	187	18	8.10293	2.22142	0.00129723	0.00562584	24392;24686;25291;25576;25639;25751;29177;29495;29753;50646;83579;84390;117287;117550;140729;171297;291245;362013	geneontology_Biological_Process_noRedundant	Nlgn3;Actn2;Gnb5;Fkbp1a;Park7;Ywhae;Ptk2b;Ywhah;Prnp;Gja1;Hpca;Ahcyl1;Cacng8;Kif5b;Dlg4;Hcn1;Anxa3;Dnm2
GO:0030902	hindbrain development	http://amigo.geneontology.org/amigo/term/GO:0030902	128	14	5.54639	2.52416	0.00130381	0.00563479	24250;24264;24399;26956;50864;54245;79215;79256;117258;117282;140908;292023;295461;300674	geneontology_Biological_Process_noRedundant	Aars;Mtpn;Cbs;Ntm;Glud1;Hnrnpk;Cntn1;Hnrnpd;Crk;Ckb;Arcn1;Ak3;Cdk5;Sec24b
GO:0035690	cellular response to drug	http://amigo.geneontology.org/amigo/term/GO:0035690	333	27	14.4293	1.8712	0.00136207	0.00585177	24686;25150;25528;25686;25728;25751;54245;65179;65180;65248;79256;81664;81743;116590;117282;117287;171116;171337;171361;191575;287069;287931;301252;310635;360593;360739;497198	geneontology_Biological_Process_noRedundant	Sirpa;Ppm1e;Rap1b;Impact;Pde2a;Park7;Ranbp1;Gnai2;Trap1;Ppp5c;Opa1;Fyn;Hsp90ab1;Apoe;Prnp;Kcnd2;Nme1;Gnai1;Hnrnpk;Hnrnpd;Crk;Mapk1;Ppm1f;Dnm2;Prkaa1;Eef1a1;Arhgef2
GO:0005773	vacuole	http://amigo.geneontology.org/amigo/term/GO:0005773	384	30	16.6392	1.80297	0.00136338	0.00585177	24192;24248;24392;25479;25524;25728;29154;29411;56718;59267;64030;64060;64862;81655;84431;94167;94197;140673;246302;290527;291624;291969;297797;298942;299971;301252;314432;315215;500282;685232	geneontology_Cellular_Component_noRedundant	Ppt1;Vps35;Atp6v1c1;Atp6v1a;Lars;Hsp90ab1;Anxa11;Dld;Apoe;Pcyox1;Capn2;Syt7;Gja1;Kit;Arl8b;Asah1;Atp6v0d1;Napa;Akr1b1;Uba1;Prdx6;Atp6v1h;Rab14;Psap;Map1lc3b;Mlc1;Dync1li2;Mtor;Cat;Vps33b
rno04670	Leukocyte transendothelial migration	http://www.kegg.jp/kegg-bin/show_pathway?rno04670+171337+24681+24832+25023+25537+25686+306400+50646+54319+63836+64465+81634+81664	115	13	4.98308	2.60883	0.00141732	0.00606244	171337;24681;24832;25023;25537;25686;306400;50646;54319;63836;64465;81634;81664	pathway_KEGG	Rap1b;Prkcg;Actn1;Gnai2;Ptk2b;Gnai1;Prkcb;Rock2;Actn4;Arhgap35;Cdc42;Ezr;Thy1
GO:0009743	response to carbohydrate	http://amigo.geneontology.org/amigo/term/GO:0009743	252	22	10.9195	2.01475	0.00145798	0.00621507	24248;24392;24426;24654;25023;25741;29715;50646;64465;65248;79434;83782;117282;117550;171116;171337;191575;266777;296849;300666;362440;100359982	geneontology_Biological_Process_noRedundant	Plcb1;Pfkl;Rap1b;Rab11b;Ptk2b;Opa1;Gstp1;Gja1;Nme1;Prkcb;Hnrnpk;C2cd2l;Nme2;Slc8a1;Mpc2;Nptx1;Cdc42;Kif5b;Ndufa9;Prkaa1;Cat;Pdk3
GO:0098552	side of membrane	http://amigo.geneontology.org/amigo/term/GO:0098552	335	27	14.5159	1.86002	0.00148604	0.00631312	24366;24400;24832;25150;25639;25686;25728;25740;29154;29495;29598;29738;50646;50664;54319;60450;64030;64202;79559;81664;83579;114117;117099;117277;289992;299799;300666	geneontology_Cellular_Component_noRedundant	Atp2b1;Gnb5;Fkbp1a;Gnaz;Gnai2;Ptk2b;Gnb1;Alcam;Fyn;Epn1;Apoe;Capn2;Gnai1;Kit;Kcnab2;C2cd2l;Fermt2;Calr;Gnao1;Gng3;Dlg4;Ezr;Bdh1;Fgb;Rab21;Matk;Thy1
rno05163	Human cytomegalovirus infection	http://www.kegg.jp/kegg-bin/show_pathway?rno05163+114117+116590+170851+24400+24654+24681+25023+25537+25636+25686+293508+302950+50646+50663+50664+54245+56718+64202+80850+81504+81664+83579	253	22	10.9628	2.00679	0.00153369	0.00649348	114117;116590;170851;24400;24654;24681;25023;25537;25636;25686;293508;302950;50646;50663;50664;54245;56718;64202;80850;81504;81664;83579	pathway_KEGG	Plcb1;Gnb5;Calm2;Prkcg;Gnai2;Grb2;Ptk2b;Gnb1;Prkaca;Prkacb;Gnai1;Prkcb;Rock2;Map2k1;Calr;Crk;Adcy9;Gnao1;Mapk1;Gng3;Gng2;Mtor
GO:0023061	signal release	http://amigo.geneontology.org/amigo/term/GO:0023061	371	29	16.0759	1.80395	0.00161397	0.00681029	24366;24392;24399;24681;24923;25479;25558;25673;25741;26989;29340;29411;29647;59267;64829;79434;85238;113965;114114;117287;117550;140667;140673;140908;171337;294560;298771;300666;100359982	geneontology_Biological_Process_noRedundant	Pfkl;Dnm1l;Ppt1;Prepl;Vps35;Rap1b;Cask;Prkce;Stxbp1;Cadps;Prkcg;Park7;Rab11b;Anxa5;Ap3m2;Synj1;Unc13a;Syt7;Gja1;Glud1;Napa;C2cd2l;Mpc2;Kif5b;Hadh;Mcu;Fgb;Cdk5;Stx1b
rno00330	Arginine and proline metabolism	http://www.kegg.jp/kegg-bin/show_pathway?rno00330+24264+25257+25721+25750+29253+361755+64313+65183	52	8	2.25322	3.55047	0.00165778	0.00697159	24264;25257;25721;25750;29253;361755;64313;65183	pathway_KEGG	Oat;Aldh3a2;Aldh18a1;Ckb;Gamt;Got2;Maoa;Maob
rno04926	Relaxin signaling pathway	http://www.kegg.jp/kegg-bin/show_pathway?rno04926+114117+116590+170851+24400+24654+25636+25686+293508+302950+50664+80850+81504+81664+83579	132	14	5.71971	2.44767	0.0017526	0.00734561	114117;116590;170851;24400;24654;25636;25686;293508;302950;50664;80850;81504;81664;83579	pathway_KEGG	Plcb1;Gnb5;Gnai2;Grb2;Gnb1;Prkaca;Prkacb;Gnai1;Map2k1;Adcy9;Gnao1;Mapk1;Gng3;Gng2
GO:0098791	Golgi subcompartment	http://amigo.geneontology.org/amigo/term/GO:0098791	479	35	20.7556	1.68629	0.00180778	0.00753006	24380;24392;25751;29340;29521;50568;56042;56718;58817;60431;64310;64351;64465;64516;65033;81732;83510;83809;84599;93646;94197;114114;114514;140945;171445;288700;290659;299799;300674;301555;304978;310710;361092;362750;365410	geneontology_Cellular_Component_noRedundant	Dnm1l;Clasp2;Prkce;Actr3;Atl1;Uso1;Copa;Vps45;Osbp;Sec23a;Sec22b;Sec31a;Stx12;Gja1;Vapb;Gad2;Ykt6;Arf1;Cdc42;Arcn1;Scamp1;Cul3;Akr7a2;Stk24;Cope;Rab14;Nsfl1c;Rab21;Dnm2;Lypla2;Cspg5;Mtor;Rab35;Tmed10;Rtn3
GO:0031647	regulation of protein stability	http://amigo.geneontology.org/amigo/term/GO:0031647	162	16	7.01965	2.27932	0.00180866	0.00753006	24686;25479;25498;25558;64202;83764;116590;117287;287155;288620;290408;294864;296654;299809;360471;363445	geneontology_Biological_Process_noRedundant	Flot2;Vps35;Cct2;Stxbp1;Park7;Cct6a;Cct5;Prnp;Gsn;Sugt1;Usp7;Calr;Stub1;Mapk1;Npm1;Usp9x
rno04915	Estrogen signaling pathway	http://www.kegg.jp/kegg-bin/show_pathway?rno04915+116590+170851+24654+25636+25686+293508+299331+301252+302950+50663+50664+81504+81664+83633	133	14	5.76304	2.42927	0.0018829	0.00779129	116590;170851;24654;25636;25686;293508;299331;301252;302950;50663;50664;81504;81664;83633	pathway_KEGG	Plcb1;Calm2;Hsp90aa1;Gnai2;Grb2;Prkaca;Hsp90ab1;Prkacb;Gnai1;Map2k1;Adcy9;Gnao1;Mapk1;Gabbr2
rno00030	Pentose phosphate pathway	http://www.kegg.jp/kegg-bin/show_pathway?rno00030+24645+25741+292804+29562+60416+65152	31	6	1.34327	4.46672	0.00188388	0.00779129	24645;25741;292804;29562;60416;65152	pathway_KEGG	Pfkl;Pfkm;Prps1;Pfkp;Pgm1;Gpi
GO:0007610	behavior	http://amigo.geneontology.org/amigo/term/GO:0007610	464	34	20.1057	1.69107	0.00199395	0.00821927	24213;24392;24399;24408;24586;24654;24681;24686;25275;25479;25613;25742;29149;29154;29411;29495;29545;50664;56718;64030;65248;81653;81672;83572;84390;85238;114705;116638;140908;170714;171297;289820;292804;300674	geneontology_Biological_Process_noRedundant	Plcb1;Ppt1;S100b;Nlgn3;Vps35;Actr2;Ncam1;Prkcg;Grin1;Uchl1;Grm7;Dynlrb1;Dbn1;Synj1;Capn2;Prnp;Gja1;Kit;Glud1;Rgs14;Strn;Atp1a3;Gnao1;Arcn1;Cnp;Dlg4;Ptprz1;Hcn1;Slc17a7;Cdk5;Prkaa1;Mtor;Pafah1b1;Gpi
rno04964	Proximal tubule bicarbonate reclamation	http://www.kegg.jp/kegg-bin/show_pathway?rno04964+24213+24214+24398+24399+361042	22	5	0.953286	5.24502	0.00214302	0.00880473	24213;24214;24398;24399;361042	pathway_KEGG	Pck2;Glud1;Atp1a3;Gls;Atp1b2
GO:0016042	lipid catabolic process	http://amigo.geneontology.org/amigo/term/GO:0016042	228	20	9.87951	2.02439	0.0022201	0.0090915	24654;25014;25045;25728;26759;29254;29411;56718;64189;65248;79244;83572;94167;113965;170670;171155;292845;306460;309207;361532	geneontology_Biological_Process_noRedundant	Plcb1;Ppt1;Dbi;Mgll;Acat1;Apoe;Acot7;Sirt2;Pafah1b2;Hadha;Hadh;Prdx6;Hadhb;Hsd17b4;Etfb;Enpp6;Prkaa1;Mtor;Dagla;Pafah1b1
GO:1901681	sulfur compound binding	http://amigo.geneontology.org/amigo/term/GO:1901681	166	16	7.19297	2.22439	0.00232292	0.00948147	24213;24423;24426;24586;25045;25104;25529;25673;25728;26759;29525;29611;114515;170670;171155;298942	geneontology_Molecular_Function_noRedundant	Dbi;Ncam1;Anxa5;Dbt;Gstp1;Dld;Apoe;Acot7;Pc;Hadha;Lancl1;Ptprs;Atp1a3;Gstm1;Pitpna;Hadhb
GO:0031099	regeneration	http://amigo.geneontology.org/amigo/term/GO:0031099	230	20	9.96617	2.00679	0.00245865	0.0100028	24392;24426;24586;24832;25291;25498;25529;25630;25728;29409;29423;29562;50568;79215;83765;114122;116549;296654;307641;361092	geneontology_Biological_Process_noRedundant	Rtn4;Ncam1;Gap43;Pkm;Mtpn;Gstp1;Apoe;Csnk2a1;Prps1;Gja1;Gsn;Mag;Csnk2a2;Ptprs;Stk24;Anxa3;Vcan;Thy1;Cspg5;Npm1
GO:0005819	spindle	http://amigo.geneontology.org/amigo/term/GO:0005819	214	19	9.27287	2.04899	0.0024688	0.0100115	29167;54241;64465;83572;83809;114514;114705;114764;116590;116646;117515;246216;290527;290640;298848;310635;360850;361532;500282	geneontology_Cellular_Component_noRedundant	Clasp2;Dctn1;Anxa11;Cltc;Sirt2;Mapre1;Prpf19;Arl8b;Rgs14;Tpt1;Cdc42;Mapk1;Sept2;Map1s;Mapre3;Nsfl1c;Nek7;Pafah1b1;Arhgef2
GO:0030258	lipid modification	http://amigo.geneontology.org/amigo/term/GO:0030258	183	17	7.9296	2.14387	0.00254934	0.0103046	25014;25045;25728;56718;64161;65248;79244;85238;113965;170670;171155;292845;313928;314641;316415;317296;502749	geneontology_Biological_Process_noRedundant	Dbi;Fam126b;Acat1;Synj1;Apoe;Mtmr1;Hadha;Pip5k1c;Agk;Hadh;Pi4ka;Hadhb;Efr3b;Hsd17b4;Etfb;Prkaa1;Mtor
GO:0071496	cellular response to external stimulus	http://amigo.geneontology.org/amigo/term/GO:0071496	281	23	12.1761	1.88895	0.00265714	0.0107057	24392;24426;25045;25150;25612;29409;29598;56718;64862;65180;65248;79215;81530;81743;114114;116590;171116;291624;306400;312890;361092;497198;683788	geneontology_Biological_Process_noRedundant	Dnm1l;Atp2b1;Impact;Dbi;Pde2a;Lars;Pdk2;Mtpn;Opa1;Fyn;Gstp1;Asns;Gja1;Kcnd2;Mag;Arhgap35;Fscn1;Mapk1;Gdap1;Stk24;Map1lc3b;Prkaa1;Mtor
GO:0015672	monovalent inorganic cation transport	http://amigo.geneontology.org/amigo/term/GO:0015672	421	31	18.2424	1.69934	0.00286837	0.0115196	24213;24686;24766;25252;25282;25576;25751;29272;29483;29715;29738;29753;50646;64310;65180;84390;94194;116638;117258;117287;117550;171373;291245;291969;295645;297797;299971;300047;310378;362013;685232	geneontology_Biological_Process_noRedundant	Slc4a10;Actn2;Atp6v1c1;Park7;Atp6v1a;Ywhae;Ptk2b;Slc12a5;Ywhah;Cyc1;Prnp;Kcnd2;Kcnab2;Nnt;Atp6v0d1;Ahcyl1;Cntn1;Slc8a1;Arf1;Scn2a;Atp1a3;Kif5b;Dlg1;Dpp6;Slc1a3;Atp6v1h;Cox6a1;Hcn1;Cox5b;Slc17a7;Dnm2
rno00062	Fatty acid elongation	http://www.kegg.jp/kegg-bin/show_pathway?rno00062+113965+140547+170670+171155+26759+29411	34	6	1.47326	4.0726	0.00308234	0.0123392	113965;140547;170670;171155;26759;29411	pathway_KEGG	Ppt1;Acot7;Hadha;Echs1;Hadh;Hadhb
GO:0051098	regulation of binding	http://amigo.geneontology.org/amigo/term/GO:0051098	236	20	10.2262	1.95577	0.00330748	0.0131982	25595;54245;60328;64862;81732;114764;117282;117287;140908;191575;192361;266759;287155;298848;299858;301252;304859;310533;313644;361532	geneontology_Biological_Process_noRedundant	Actr3;Park7;Mark2;Lrp1;Hsp90ab1;Sirt2;Hspa4;Mapre1;Rapgef2;Nme1;Dhx9;Hnrnpk;Ppp1r2;Crk;Stub1;Rap1gap;Map2;Mapre3;Cdk5;Map1lc3b
GO:0031970	organelle envelope lumen	http://amigo.geneontology.org/amigo/term/GO:0031970	71	9	3.07651	2.92539	0.00344252	0.0136933	24248;26956;29154;81805;171116;287069;306840;361385;502749	geneontology_Cellular_Component_noRedundant	Sirt5;Trap1;Opa1;Capn2;Agk;Ak3;Ndufb7;Suox;Cat
GO:0016790	thiolester hydrolase activity	http://amigo.geneontology.org/amigo/term/GO:0016790	35	6	1.51659	3.95624	0.00358625	0.0142198	24439;26759;29411;50671;83510;290401	geneontology_Molecular_Function_noRedundant	Ppt1;Fasn;Acot7;Esd;Hagh;Lypla2
GO:0071407	cellular response to organic cyclic compound	http://amigo.geneontology.org/amigo/term/GO:0071407	483	34	20.929	1.62454	0.00378005	0.0149408	24426;24654;25498;25686;25728;25751;29489;29598;29715;50686;54319;60666;64202;65179;79244;79256;81732;81743;84390;114114;116590;117282;117287;171337;289820;301252;304859;310533;312890;315215;360739;361532;362809;497198	geneontology_Biological_Process_noRedundant	Plcb1;Dnm1l;Atp2b1;Rap1b;Impact;Actr2;Pde2a;Actr3;Dync1h1;Park7;Ranbp1;Gpd1;Ppp5c;Hsp90ab1;Gstp1;Apoe;Sirt2;Rapgef2;Gnai1;Dhx9;Hnrnpk;Hnrnpd;Slc8a1;Calr;Mapk1;Gdap1;Hcn1;Ezr;Hsd17b4;Dnm2;Mlc1;Npm1;Gsk3a;Ptges3
GO:0090662	ATP hydrolysis coupled transmembrane transport	http://amigo.geneontology.org/amigo/term/GO:0090662	25	5	1.08328	4.61562	0.00388351	0.0152531	24213;291969;297797;299971;685232	geneontology_Biological_Process_noRedundant	Atp6v1c1;Atp6v1a;Atp6v0d1;Atp1a3;Atp6v1h
GO:0016776	phosphotransferase activity, phosphate group as acceptor	http://amigo.geneontology.org/amigo/term/GO:0016776	25	5	1.08328	4.61562	0.00388351	0.0152531	26956;29223;83782;191575;303179	geneontology_Molecular_Function_noRedundant	Nme1;Guk1;Ak4;Nme2;Ak3
GO:0047485	protein N-terminus binding	http://amigo.geneontology.org/amigo/term/GO:0047485	86	10	3.72648	2.6835	0.00396732	0.0155335	25498;25558;25577;60328;60627;63836;64829;287444;307641;313231	geneontology_Molecular_Function_noRedundant	Stxbp1;Mark2;Eif5a;Unc13a;Actn4;Csnk2a2;Exoc5;Alg2;Npm1;Ywhaq
rno04520	Adherens junction	http://www.kegg.jp/kegg-bin/show_pathway?rno04520+116549+116590+25150+294568+307641+63836+64465+682507+81634	73	9	3.16318	2.84524	0.00415776	0.0162283	116549;116590;25150;294568;307641;63836;64465;682507;81634	pathway_KEGG	Actn1;Wasl;Fyn;Csnk2a1;Actn4;Csnk2a2;Cdc42;Mapk1;Wasf1
rno05170	Human immunodeficiency virus 1 infection	http://www.kegg.jp/kegg-bin/show_pathway?rno05170+114117+116590+170851+24400+24681+25023+25686+287280+306332+50646+50663+50664+54245+56718+64202+64470+64624+80850+81664+83579	243	20	10.5295	1.89943	0.00459418	0.0178758	114117;116590;170851;24400;24681;25023;25686;287280;306332;50646;50663;50664;54245;56718;64202;64470;64624;80850;81664;83579	pathway_KEGG	Cul5;Gnb5;Calm2;Prkcg;Gnai2;Ptk2b;Gnb1;Ddb1;Gnai1;Prkcb;Map2k1;Ap1m1;Calr;Skp1;Crk;Gnao1;Mapk1;Gng3;Gng2;Mtor
rno00270	Cysteine and methionine metabolism	http://www.kegg.jp/kegg-bin/show_pathway?rno00270+24250+25274+25721+288912+29592+305177+362013	49	7	2.12323	3.29687	0.00489478	0.0189863	24250;25274;25721;288912;29592;305177;362013	pathway_KEGG	Bcat1;Cbs;Ahcyl1;Enoph1;Tst;Got2;Mri1
GO:0016197	endosomal transport	http://amigo.geneontology.org/amigo/term/GO:0016197	148	14	6.41301	2.18306	0.00501176	0.0193798	25479;64351;65033;79434;94197;116643;117103;192249;288700;291245;303222;309678;311193;314633	geneontology_Biological_Process_noRedundant	Vps35;Actn2;Arhgap1;Rab11b;Rab8a;Stx12;Arhgap44;Ykt6;Ehd3;Ap3d1;Trappc10;Rab14;Vcp;Rab35
GO:0043177	organic acid binding	http://amigo.geneontology.org/amigo/term/GO:0043177	165	15	7.14964	2.09801	0.0054252	0.0209138	24380;24408;24440;25104;25721;29331;29409;29525;29611;80841;81672;83782;114122;292023;361129	geneontology_Molecular_Function_noRedundant	Aars;Grin1;Grm7;Dbt;Pc;Mag;Hapln4;Gad2;Nme2;Hbb;Pitpna;Fabp7;Got2;Vcan;Hapln1
GO:0097066	response to thyroid hormone	http://amigo.geneontology.org/amigo/term/GO:0097066	38	6	1.64658	3.64391	0.00546583	0.0210039	24192;24213;25673;29489;64030;287444	geneontology_Biological_Process_noRedundant	Dync1h1;Eif5a;Anxa5;Kit;Atp1a3;Akr1b1
GO:0044298	cell body membrane	http://amigo.geneontology.org/amigo/term/GO:0044298	27	5	1.16994	4.27372	0.00549452	0.0210039	24215;24832;29177;29598;65180	geneontology_Cellular_Component_noRedundant	Atp2b1;Atp2b2;Kcnd2;Hpca;Thy1
GO:0046486	glycerolipid metabolic process	http://amigo.geneontology.org/amigo/term/GO:0046486	247	20	10.7028	1.86867	0.00549903	0.0210039	24232;24248;24654;25288;25728;29154;29254;60666;64161;80849;85238;89841;94167;113976;117243;309207;313928;314641;316415;317296	geneontology_Biological_Process_noRedundant	Plcb1;Mgll;Fam126b;Gpd1;Acsl1;Synj1;Apoe;Mtmr1;Capn2;Pip5k1c;Acsl4;Acsl6;Inpp4a;Pcyt2;Pi4ka;Prdx6;Efr3b;C3;Cat;Dagla
GO:0008565	protein transporter activity	http://amigo.geneontology.org/amigo/term/GO:0008565	63	8	2.72986	2.93055	0.00562921	0.0214356	25479;56042;65046;85252;306182;308939;315215;362273	geneontology_Molecular_Function_noRedundant	Vps35;Uso1;Ap2s1;Xpo1;Ipo7;Cse1l;Mlc1;Ipo5
GO:0097305	response to alcohol	http://amigo.geneontology.org/amigo/term/GO:0097305	299	23	12.956	1.77524	0.00568176	0.0215699	24248;24423;24426;25023;25150;25604;25686;25721;25728;25750;29598;50646;65248;79256;81729;117099;117282;287986;289820;293481;296654;315215;362375	geneontology_Biological_Process_noRedundant	Atp2b1;Pcmt1;Actr2;Ptk2b;Lancl2;Fyn;Gstp1;Apoe;Gsn;Gnai1;Prkcb;Hnrnpk;Tufm;Hnrnpd;Gstm1;Eif4g1;Got2;Bdh1;Mlc1;Prkaa1;Rpl10a;Cat;Maob
GO:0033500	carbohydrate homeostasis	http://amigo.geneontology.org/amigo/term/GO:0033500	215	18	9.3162	1.93212	0.00585148	0.022147	65152;65248;79434;81530;83782;117103;117282;117287;117550;170851;171116;191575;266777;292804;294560;296849;300666;100359982	geneontology_Biological_Process_noRedundant	Park7;Pdk2;Rab11b;Pfkm;Opa1;Rab8a;Nme1;Hnrnpk;Map2k1;C2cd2l;Nme2;Mpc2;Nptx1;Kif5b;Mcu;Prkaa1;Pdk3;Gpi
GO:0031201	SNARE complex	http://amigo.geneontology.org/amigo/term/GO:0031201	39	6	1.68992	3.55047	0.00622814	0.0234306	24923;64351;65033;81022;140673;310710	geneontology_Cellular_Component_noRedundant	Stxbp5;Sec22b;Stx12;Napa;Ykt6;Stx1b
rno04960	Aldosterone-regulated sodium reabsorption	http://www.kegg.jp/kegg-bin/show_pathway?rno04960+116590+24213+24214+24681+25023+291553	39	6	1.68992	3.55047	0.00622814	0.0234306	116590;24213;24214;24681;25023;291553	pathway_KEGG	Prkcg;Prkcb;Atp1a3;Mapk1;Atp1b2;Nedd4l
GO:0061919	process utilizing autophagic mechanism	http://amigo.geneontology.org/amigo/term/GO:0061919	251	20	10.8761	1.83889	0.00654559	0.0245509	54241;56718;58817;64189;64862;65248;83809;114114;116643;116645;117103;117287;170851;287155;289350;291624;291750;301252;310710;361532	geneontology_Biological_Process_noRedundant	Rab3gap2;Dnm1l;Park7;Lars;Rab8a;Hsp90ab1;Cltc;Sec23a;Sirt2;Pafah1b2;Trappc8;Sec22b;Plaa;Map2k1;Stub1;Nsfl1c;Vcp;Map1lc3b;Prkaa1;Mtor
GO:0032947	protein-containing complex scaffold activity	http://amigo.geneontology.org/amigo/term/GO:0032947	65	8	2.81653	2.84038	0.00680434	0.025425	29546;56003;83788;114705;117515;287606;294708;305227	geneontology_Molecular_Function_noRedundant	Sgtb;Sept3;Sept4;Homer1;Sept11;Rgs14;Sept9;Sept2
GO:0016765	transferase activity, transferring alkyl or aryl (other than methyl) groups	http://amigo.geneontology.org/amigo/term/GO:0016765	52	7	2.25322	3.10666	0.00681935	0.025425	24250;24423;24426;58983;499422;681913;108348148	geneontology_Molecular_Function_noRedundant	Rabggta;Gstp1;Cbs;Gstt3;Gstm1;Gstm3;Gstz1
rno00260	Glycine, serine and threonine metabolism	http://www.kegg.jp/kegg-bin/show_pathway?rno00260+24250+24642+25257+25750+29253+298942	40	6	1.73325	3.46171	0.0070649	0.0262621	24250;24642;25257;25750;29253;298942	pathway_KEGG	Pgam1;Dld;Cbs;Gamt;Maoa;Maob
GO:0014823	response to activity	http://amigo.geneontology.org/amigo/term/GO:0014823	108	11	4.67977	2.35054	0.00710509	0.0262991	24248;24586;25721;56718;65248;81653;83765;113965;117282;171116;315150	geneontology_Biological_Process_noRedundant	Rtn4;Ncam1;Opa1;Dbn1;Hnrnpk;Adsl;Hadh;Got2;Prkaa1;Mtor;Cat
GO:0062012	regulation of small molecule metabolic process	http://amigo.geneontology.org/amigo/term/GO:0062012	236	19	10.2262	1.85798	0.00711696	0.0262991	24668;25045;25728;29177;50646;54241;56718;60666;64030;65248;81530;114114;116643;117287;170851;296849;306840;308578;316021	geneontology_Biological_Process_noRedundant	Dnm1l;Ppp1ca;Dbi;Sirt5;Park7;Pdk2;Ptk2b;Gpd1;Cltc;Apoe;Kit;Map2k1;Hpca;Ap2a1;Vcp;Epm2aip1;Prkaa1;Mtor;Pdk3
rno05205	Proteoglycans in cancer	http://www.kegg.jp/kegg-bin/show_pathway?rno05205+116590+170851+171140+24668+24681+25023+25537+25636+293508+300253+362036+365355+54319+56718+58920+64465+81504	203	17	8.79623	1.93265	0.00725384	0.0267258	116590;170851;171140;24668;24681;25023;25537;25636;293508;300253;362036;365355;54319;56718;58920;64465;81504	pathway_KEGG	Ank2;Ppp1ca;Prkcg;Grb2;Prkaca;Prkacb;Prkcb;Rock2;Map2k1;Rras2;Cdc42;Gpc1;Mapk1;Eif4b;Ezr;Camk2g;Mtor
GO:0097223	sperm part	http://amigo.geneontology.org/amigo/term/GO:0097223	155	14	6.71633	2.08447	0.00748824	0.0275083	64030;64202;65152;81732;83764;117287;117515;117556;287606;298942;301252;301555;307641;500988	geneontology_Cellular_Component_noRedundant	Flot2;Actr3;Sept4;Park7;Pfkm;Hsp90ab1;Dld;Sv2b;Kit;Csnk2a2;Calr;Cul3;Sept2;Ddx6
GO:0043531	ADP binding	http://amigo.geneontology.org/amigo/term/GO:0043531	29	5	1.2566	3.97898	0.0075272	0.0275691	25035;25630;29562;65179;116643	geneontology_Molecular_Function_noRedundant	Pkm;Ppp5c;Prps1;Vcp;Cyb5r3
rno04270	Vascular smooth muscle contraction	http://www.kegg.jp/kegg-bin/show_pathway?rno04270+116590+170851+24654+24668+24681+25023+25537+25636+29340+293508+302950+50663	124	12	5.37306	2.23336	0.00755455	0.0275691	116590;170851;24654;24668;24681;25023;25537;25636;29340;293508;302950;50663	pathway_KEGG	Plcb1;Ppp1ca;Prkce;Calm2;Prkcg;Prkaca;Prkacb;Prkcb;Rock2;Map2k1;Adcy9;Mapk1
GO:0005811	lipid droplet	http://amigo.geneontology.org/amigo/term/GO:0005811	53	7	2.29655	3.04805	0.00757102	0.0275691	25035;29254;113976;116643;171337;246216;266759	geneontology_Cellular_Component_noRedundant	Rap1b;Mgll;Hspa4;Prpf19;Acsl4;Vcp;Cyb5r3
GO:0051052	regulation of DNA metabolic process	http://amigo.geneontology.org/amigo/term/GO:0051052	290	22	12.566	1.75075	0.00788499	0.0286289	24392;24681;25291;25498;50646;50686;64303;64465;79256;116590;116725;288620;289820;293705;294864;299809;301252;304859;360471;362361;362809;363445	geneontology_Biological_Process_noRedundant	Cct2;Actr2;Pfn1;Hnrnpa2b1;Prkcg;Cct6a;Ptk2b;Hsp90ab1;Cct5;Gja1;Dhx9;Usp7;Hnrnpd;Cdc42;Mapk1;Anxa3;Otub1;Ube2n;Npm1;Usp9x;Gsk3a;Ptges3
GO:0000287	magnesium ion binding	http://amigo.geneontology.org/amigo/term/GO:0000287	156	14	6.75966	2.07111	0.00791004	0.0286366	25630;25686;29562;60328;64310;94173;114096;117272;191575;293508;301544;305177;361596;361663	geneontology_Molecular_Function_noRedundant	Prpsap2;Mark2;Pkm;Lhpp;Prps1;Nme1;Prkacb;Gnai1;Idh3B;Idh2;Arf1;Enoph1;Idh3a;Farsb
GO:0051347	positive regulation of transferase activity	http://amigo.geneontology.org/amigo/term/GO:0051347	379	27	16.4225	1.64408	0.00795372	0.0287115	24418;24686;25288;25498;29495;50646;50686;54245;56029;58948;64030;65248;79256;116590;116725;140908;170851;286993;287155;298848;299809;301252;310533;316021;361092;362361;362809	geneontology_Biological_Process_noRedundant	Cct2;Dlg3;Hnrnpa2b1;Ptk2b;Acsl1;Hsp90ab1;Prnp;Rapgef2;Taok1;Kit;Map2k1;Hnrnpd;Crk;Stub1;Mapk1;Dlg4;Stk24;Srcin1;Grm5;Mapre3;Cdk5;Ube2n;Epm2aip1;Npm1;Prkaa1;Gsk3a;Ptges3
GO:0097110	scaffold protein binding	http://amigo.geneontology.org/amigo/term/GO:0097110	41	6	1.77658	3.37728	0.00798004	0.0287235	24392;29495;29546;29753;54245;117287	geneontology_Molecular_Function_noRedundant	Homer1;Park7;Ywhae;Gja1;Crk;Dlg4
GO:0043043	peptide biosynthetic process	http://amigo.geneontology.org/amigo/term/GO:0043043	490	33	21.2323	1.55424	0.00821153	0.0294718	25498;29236;50646;56718;64202;65248;79256;81729;116483;116590;161477;171361;266975;287069;287444;287986;291624;292023;293481;294810;299027;300253;301544;302500;303746;303831;304859;308666;313047;314442;362173;497198;100361854	geneontology_Biological_Process_noRedundant	Aars;Impact;Yars;Eif4a2;Tars;Lars;Eif5a;LOC100361854;Trap1;Ptk2b;Sars;Mcts1;Cyfip1;Dhx9;Rps13;Rpsa;Tufm;Hnrnpd;Calr;Wars;Mapk1;Farsb;Mrpl12;Eif4g1;Dars;Eif4b;Caprin1;Eif2s3;Npm1;Prkaa1;Mtor;Rpl10a;Eef1a1
GO:0043270	positive regulation of ion transport	http://amigo.geneontology.org/amigo/term/GO:0043270	223	18	9.66285	1.8628	0.00844034	0.0302063	24408;24832;25045;25252;25558;25751;29272;64310;83765;84390;117243;117258;117287;117550;140729;171297;291245;362013	geneontology_Biological_Process_noRedundant	Nlgn3;Actn2;Rtn4;Dbi;Stxbp1;Grin1;Park7;Acsl6;Ahcyl1;Cntn1;Arf1;Cacng8;Kif5b;Dlg1;Dpp6;Hcn1;Dnm2;Thy1
GO:0072511	divalent inorganic cation transport	http://amigo.geneontology.org/amigo/term/GO:0072511	345	25	14.9493	1.67232	0.00848979	0.0302457	24215;24392;24408;24686;24832;25045;25150;25639;25673;29177;29340;29546;29598;29715;29753;50646;50664;81664;83579;140729;140908;171116;294560;306243;306439	geneontology_Biological_Process_noRedundant	Atp2b1;Cacna2d3;Dbi;Prkce;Gnb5;Fkbp1a;Homer1;Grin1;Atp2b2;Ywhae;Gnai2;Anxa5;Ptk2b;Opa1;Fyn;Prnp;Gja1;Gpm6a;Hpca;Slc8a1;Cacng8;Gnao1;Mcu;Cdk5;Thy1
GO:0007568	aging	http://amigo.geneontology.org/amigo/term/GO:0007568	381	27	16.5092	1.63545	0.00849979	0.0302457	24248;24586;24686;25275;25498;25604;25728;29328;29598;50664;50686;56718;63864;64202;79244;81504;81653;83765;84390;117282;117287;171116;171361;287444;296654;298942;299858	geneontology_Biological_Process_noRedundant	Atp2b1;Pcmt1;Rtn4;Ncam1;Park7;Grb2;Eif5a;Opa1;Lrp1;Dbn1;Dld;Apoe;Prnp;Gsn;Hnrnpk;Calr;Gpx4;Gnao1;Cnp;Hcn1;Hsd17b4;Hsd17b10;Npm1;Mtor;Cat;Gsk3a;Eef1a1
GO:0071897	DNA biosynthetic process	http://amigo.geneontology.org/amigo/term/GO:0071897	126	12	5.45973	2.19791	0.00854626	0.0303247	24392;25498;50646;79256;116590;116643;288620;294864;299809;301252;362361;362809	geneontology_Biological_Process_noRedundant	Cct2;Hnrnpa2b1;Cct6a;Ptk2b;Hsp90ab1;Cct5;Gja1;Hnrnpd;Mapk1;Vcp;Npm1;Ptges3
rno04020	Calcium signaling pathway	http://www.kegg.jp/kegg-bin/show_pathway?rno04020+171140+24215+24408+24418+24654+24681+25023+25636+293508+294560+29598+29715+302950+50646+50663+83532	190	16	8.23292	1.94342	0.00857874	0.0303537	171140;24215;24408;24418;24654;24681;25023;25636;293508;294560;29598;29715;302950;50646;50663;83532	pathway_KEGG	Plcb1;Atp2b1;Calm2;Prkcg;Grin1;Atp2b2;Ptk2b;Prkaca;Prkacb;Prkcb;Slc8a1;Adcy9;Mcu;Grm5;Camk2g;Vdac3
rno00983	Drug metabolism	http://www.kegg.jp/kegg-bin/show_pathway?rno00983+108348148+114846+191575+24423+24426+24465+311422+494500+64352+83782	96	10	4.15979	2.40397	0.00860922	0.0303755	108348148;114846;191575;24423;24426;24465;311422;494500;64352;83782	pathway_KEGG	Gstp1;Itpa;Gsta3;Nme1;Gstm5;Nme2;Hprt1;Gsto1;Gstm1;Gstm3
rno00630	Glyoxylate and dicarboxylate metabolism	http://www.kegg.jp/kegg-bin/show_pathway?rno00630+170587+24248+25014+293829+298942	30	5	1.29993	3.84635	0.00871741	0.0306705	170587;24248;25014;293829;298942	pathway_KEGG	Acat1;Dld;Cs;Mcee;Cat
rno04152	AMPK signaling pathway	http://www.kegg.jp/kegg-bin/show_pathway?rno04152+117103+117281+24672+25741+361042+50671+56718+60416+65152+65248+79434+94197	127	12	5.50306	2.18061	0.00907879	0.0318523	117103;117281;24672;25741;361042;50671;56718;60416;65152;65248;79434;94197	pathway_KEGG	Pfkl;Ppp2r1a;Fasn;Pck2;Rab11b;Pfkm;Rab8a;Ppp2ca;Pfkp;Rab14;Prkaa1;Mtor
GO:0019902	phosphatase binding	http://amigo.geneontology.org/amigo/term/GO:0019902	143	13	6.19636	2.09801	0.00926536	0.0324158	24408;24586;24668;25252;25528;29149;29495;58948;64053;81504;116590;116643;140729	geneontology_Molecular_Function_noRedundant	Dlg2;Sirpa;Ppp1ca;Dlg3;Ncam1;Grin1;Grb2;Strn;Cacng8;Dlg1;Mapk1;Dlg4;Vcp
GO:0016887	ATPase activity	http://amigo.geneontology.org/amigo/term/GO:0016887	312	23	13.5193	1.70127	0.00930645	0.0324686	24213;24215;25673;29489;29598;29677;81827;84474;116643;117262;117550;246302;289693;289990;291969;296488;297797;299971;303831;304859;362587;363288;685232	geneontology_Molecular_Function_noRedundant	Atp2b1;Macf1;Eif4a2;Dync1h1;Atp6v1c1;Atp6v1a;Atp2b2;Anxa5;Psmc3;Psmc6;Pcyox1;Dhx9;Atp6v0d1;Psmc4;Kif1a;Atp1a3;Kif5b;Atp6v1h;Ola1;Dhx15;Psmc5;Vcp;Ddx1
GO:0031589	cell-substrate adhesion	http://amigo.geneontology.org/amigo/term/GO:0031589	209	17	9.05621	1.87716	0.00957574	0.033315	24366;24832;25613;25751;50646;54245;56029;63836;64202;64465;81653;140908;287931;289992;291245;292597;362587	geneontology_Biological_Process_noRedundant	Macf1;Actn2;Ptk2b;Dbn1;Actn4;Fermt2;Calr;Ttyh1;Crk;Cdc42;Ppm1f;Ptprz1;Srcin1;Fgb;Cdk5;Dnm2;Thy1
GO:0016323	basolateral plasma membrane	http://amigo.geneontology.org/amigo/term/GO:0016323	176	15	7.62628	1.96688	0.00965931	0.0335124	25252;25604;29483;29598;29647;54319;58948;64053;83764;84390;192213;299858;301252;308578;315215	geneontology_Cellular_Component_noRedundant	Dlg2;Atp2b1;Pcmt1;Flot2;Cask;Dlg3;Lrp1;Hsp90ab1;Dlg1;Slc1a3;Hcn1;Ezr;Ap2a1;Mlc1;Rasgrf1
rno00480	Glutathione metabolism	http://www.kegg.jp/kegg-bin/show_pathway?rno00480+108348148+114846+24423+24426+29328+361596+494500+64352	69	8	2.98985	2.67572	0.00969961	0.0335468	108348148;114846;24423;24426;29328;361596;494500;64352	pathway_KEGG	Gstp1;Gsta3;Idh2;Gstm5;Gpx4;Gsto1;Gstm1;Gstm3
GO:0097038	perinuclear endoplasmic reticulum	http://amigo.geneontology.org/amigo/term/GO:0097038	20	4	0.866623	4.61562	0.00972293	0.0335468	25150;29154;65180;365410	geneontology_Cellular_Component_noRedundant	Fyn;Osbp;Capn2;Kcnd2
GO:0009410	response to xenobiotic stimulus	http://amigo.geneontology.org/amigo/term/GO:0009410	296	22	12.826	1.71526	0.00989406	0.0339766	24423;24426;24586;24681;25023;25288;25639;25721;25751;29177;29546;50646;50664;56718;65179;65248;140908;192213;292804;293508;301252;364052	geneontology_Biological_Process_noRedundant	Fkbp1a;Ncam1;Prkcg;Homer1;Ptk2b;Acsl1;Ppp5c;Hsp90ab1;Gstp1;Prkacb;Prkcb;Hpca;Gnao1;Gstm1;Got2;Pea15;Cdk5;Dnm2;Prkaa1;Mtor;Rasgrf1;Gpi
GO:0044325	ion channel binding	http://amigo.geneontology.org/amigo/term/GO:0044325	98	10	4.24645	2.35491	0.0099019	0.0339766	24686;25150;25577;25639;29738;29753;63836;117277;291245;301252	geneontology_Molecular_Function_noRedundant	Actn2;Fkbp1a;Ywhae;Fyn;Hsp90ab1;Epn1;Prnp;Kcnab2;Actn4;Ywhaq
GO:0007164	establishment of tissue polarity	http://amigo.geneontology.org/amigo/term/GO:0007164	31	5	1.34327	3.72227	0.0100315	0.0340473	58948;60627;83572;295461;360950	geneontology_Biological_Process_noRedundant	Dlg3;Wdr1;Exoc5;Sec24b;Pafah1b1
GO:0010257	NADH dehydrogenase complex assembly	http://amigo.geneontology.org/amigo/term/GO:0010257	31	5	1.34327	3.72227	0.0100315	0.0340473	25488;301123;361385;362440;681418	geneontology_Biological_Process_noRedundant	Ndufa11;Ndufa5;Ndufa9;Ndufb7;Ndufb10
GO:0019205	nucleobase-containing compound kinase activity	http://amigo.geneontology.org/amigo/term/GO:0019205	31	5	1.34327	3.72227	0.0100315	0.0340473	26956;29223;83782;191575;303179	geneontology_Molecular_Function_noRedundant	Nme1;Guk1;Ak4;Nme2;Ak3
GO:0030551	cyclic nucleotide binding	http://amigo.geneontology.org/amigo/term/GO:0030551	31	5	1.34327	3.72227	0.0100315	0.0340473	25275;25725;81743;84390;310533	geneontology_Molecular_Function_noRedundant	Pde2a;Prkar1a;Rapgef2;Cnp;Hcn1
rno04142	Lysosome	http://www.kegg.jp/kegg-bin/show_pathway?rno04142+140667+25524+291969+29411+297797+306332+308777+314633+363494+54241+64529+84431	129	12	5.58972	2.1468	0.0102211	0.0345965	140667;25524;291969;29411;297797;306332;308777;314633;363494;54241;64529;84431	pathway_KEGG	Ppt1;Ctsb;Ap3b2;Ap3m2;Cltc;Ap1m1;Asah1;Atp6v0d1;Ap3d1;Atp6v1h;Gla;Psap
GO:0051427	hormone receptor binding	http://amigo.geneontology.org/amigo/term/GO:0051427	114	11	4.93975	2.22683	0.0105144	0.0354933	25023;25150;50664;63836;63864;64202;81827;117287;117553;317385;361967	geneontology_Molecular_Function_noRedundant	Park7;Fyn;Ppid;Fus;Prkcb;Actn4;Uba3;Calr;Gnao1;Hsd17b10;Psmc5
rno05211	Renal cell carcinoma	http://www.kegg.jp/kegg-bin/show_pathway?rno05211+116590+170851+171337+24368+361258+54245+64465+81504	70	8	3.03318	2.63749	0.0105482	0.0354985	116590;170851;171337;24368;361258;54245;64465;81504	pathway_KEGG	Rap1b;Grb2;Fh;Map2k1;Crk;Cdc42;Mapk1;Cul2
rno04972	Pancreatic secretion	http://www.kegg.jp/kegg-bin/show_pathway?rno04972+117103+171337+24213+24214+24215+24654+24681+25023+29598+302950	99	10	4.28979	2.33112	0.0106012	0.0354985	117103;171337;24213;24214;24215;24654;24681;25023;29598;302950	pathway_KEGG	Plcb1;Atp2b1;Rap1b;Prkcg;Atp2b2;Rab8a;Prkcb;Atp1a3;Adcy9;Atp1b2
rno05231	Choline metabolism in cancer	http://www.kegg.jp/kegg-bin/show_pathway?rno05231+116590+170851+24681+25023+294568+314641+56718+682507+81504+85254	99	10	4.28979	2.33112	0.0106012	0.0354985	116590;170851;24681;25023;294568;314641;56718;682507;81504;85254	pathway_KEGG	Prkcg;Wasl;Grb2;Slc44a1;Pip5k1c;Prkcb;Map2k1;Mapk1;Wasf1;Mtor
GO:0070482	response to oxygen levels	http://amigo.geneontology.org/amigo/term/GO:0070482	372	26	16.1192	1.61298	0.0114489	0.0381189	24248;24250;24400;25498;25604;25630;25742;29154;29715;50646;56718;63836;65180;65248;114114;114766;117243;170851;171116;171140;287155;291969;296849;315150;361532;685232	geneontology_Biological_Process_noRedundant	Dnm1l;Pcmt1;S100b;Atp6v1a;Pkm;Ptk2b;Gnb1;Opa1;Sirt2;Capn2;Cbs;Kcnd2;Acsl6;Map2k1;Actn4;Atp6v0d1;Slc8a1;Adsl;Stub1;Phb2;Camk2g;Npm1;Prkaa1;Mtor;Cat;Pdk3
rno05214	Glioma	http://www.kegg.jp/kegg-bin/show_pathway?rno05214+116590+170851+171140+24681+25023+50663+56718+81504	71	8	3.07651	2.60035	0.0114505	0.0381189	116590;170851;171140;24681;25023;50663;56718;81504	pathway_KEGG	Calm2;Prkcg;Grb2;Prkcb;Map2k1;Mapk1;Camk2g;Mtor
GO:0140104	molecular carrier activity	http://amigo.geneontology.org/amigo/term/GO:0140104	32	5	1.3866	3.60595	0.0114754	0.0381189	24440;84355;85252;117287;362273	geneontology_Molecular_Function_noRedundant	Park7;Xpo1;Hbb;Atox1;Cse1l
GO:0007005	mitochondrion organization	http://amigo.geneontology.org/amigo/term/GO:0007005	318	23	13.7793	1.66917	0.0115203	0.0381667	25275;25479;25488;50686;64862;65248;79563;81743;114114;117287;140908;171116;266777;287721;291709;300111;301123;312890;317191;361385;362440;502749;681418	geneontology_Biological_Process_noRedundant	Dnm1l;Vps35;Pde2a;Park7;Opa1;Ndufa11;Samm50;Ndufa5;Agk;Nptx1;Cnp;Vat1;Gdap1;Grpel1;Ndufa9;Slc25a46;Apool;Cdk5;Ndufb7;Map1lc3b;Prkaa1;Gsk3a;Ndufb10
GO:0045472	response to ether	http://amigo.geneontology.org/amigo/term/GO:0045472	21	4	0.909954	4.39582	0.0116068	0.0383516	24654;79256;117282;171116	geneontology_Biological_Process_noRedundant	Plcb1;Opa1;Hnrnpk;Hnrnpd
GO:0098754	detoxification	http://amigo.geneontology.org/amigo/term/GO:0098754	86	9	3.72648	2.41515	0.0120172	0.0393969	24248;24426;24440;29328;29338;94167;117287;290401;310378	geneontology_Biological_Process_noRedundant	Prdx2;Park7;Gstp1;Nnt;Esd;Gpx4;Hbb;Prdx6;Cat
rno04911	Insulin secretion	http://www.kegg.jp/kegg-bin/show_pathway?rno04911+171140+24213+24214+24654+24681+25023+25636+293508+302950	86	9	3.72648	2.41515	0.0120172	0.0393969	171140;24213;24214;24654;24681;25023;25636;293508;302950	pathway_KEGG	Plcb1;Prkcg;Prkaca;Prkacb;Prkcb;Atp1a3;Adcy9;Atp1b2;Camk2g
GO:0004672	protein kinase activity	http://amigo.geneontology.org/amigo/term/GO:0004672	466	31	20.1923	1.53524	0.0120178	0.0393969	24681;25023;25150;25537;29340;29647;50646;50686;56718;60328;60450;64030;65248;79011;81530;83782;83825;84009;116549;116590;140908;170851;171140;286993;293508;296849;307641;310192;310698;360850;361092	geneontology_Molecular_Function_noRedundant	Cask;Prkce;Dclk1;Prkcg;Pdk2;Mark2;Ptk2b;Fyn;Trio;Csnk2a1;Taok1;Prkacb;Kit;Prkcb;Rock2;Map2k1;Csnk2a2;Dclk2;Nme2;Kalrn;Mapk1;Stk24;Cdk5;Nek7;Matk;Camk2g;Prkaa1;Mtor;Pdk3;Gsk3a;Camkv
GO:0042578	phosphoric ester hydrolase activity	http://amigo.geneontology.org/amigo/term/GO:0042578	284	21	12.3061	1.70648	0.0121892	0.0398542	24400;24654;24668;25275;25529;25613;25725;25741;65179;80849;81743;83537;85238;117281;287931;305177;306460;317296;360593;361663;100363253	geneontology_Molecular_Function_noRedundant	Plcb1;Pfkl;Ppp2r1a;Ppp1ca;Ppm1e;Pde2a;Lhpp;Prkar1a;Gnb1;Ppp5c;Synj1;Nt5c2;Mtmr1;Inpp4a;Ptprs;Enoph1;Ppm1f;Cnp;Ptprz1;Enpp6;Smpd2
rno04918	Thyroid hormone synthesis	http://www.kegg.jp/kegg-bin/show_pathway?rno04918+24213+24214+24654+24681+25023+25636+293508+302950	72	8	3.11984	2.56423	0.0124084	0.0404651	24213;24214;24654;24681;25023;25636;293508;302950	pathway_KEGG	Plcb1;Prkcg;Prkaca;Prkacb;Prkcb;Atp1a3;Adcy9;Atp1b2
GO:0006081	cellular aldehyde metabolic process	http://amigo.geneontology.org/amigo/term/GO:0006081	45	6	1.9499	3.07708	0.0125005	0.0406592	24439;65183;117287;290401;292804;361596	geneontology_Biological_Process_noRedundant	Park7;Aldh3a2;Idh2;Esd;Hagh;Gpi
rno00230	Purine metabolism	http://www.kegg.jp/kegg-bin/show_pathway?rno00230+100363253+117533+191575+24465+24645+25630+26956+29223+29562+302950+303179+311422+315150+81743+83782	182	15	7.88627	1.90204	0.0128815	0.0417895	100363253;117533;191575;24465;24645;25630;26956;29223;29562;302950;303179;311422;315150;81743;83782	pathway_KEGG	Pde2a;Pkm;Nt5c2;Prps1;Itpa;Nme1;Guk1;Gmpr;Ak4;Nme2;Adsl;Hprt1;Adcy9;Ak3;Pgm1
GO:1901567	fatty acid derivative binding	http://amigo.geneontology.org/amigo/term/GO:1901567	33	5	1.42993	3.49668	0.0130543	0.0422405	25045;26759;29525;170670;171155	geneontology_Molecular_Function_noRedundant	Dbi;Acot7;Hadha;Pitpna;Hadhb
rno04919	Thyroid hormone signaling pathway	http://www.kegg.jp/kegg-bin/show_pathway?rno04919+116590+170851+24213+24214+24654+24681+25023+25636+293508+56718+60416	118	11	5.11308	2.15135	0.0134045	0.0431516	116590;170851;24213;24214;24654;24681;25023;25636;293508;56718;60416	pathway_KEGG	Plcb1;Prkcg;Prkaca;Prkacb;Prkcb;Map2k1;Pfkp;Atp1a3;Mapk1;Atp1b2;Mtor
rno00982	Drug metabolism	http://www.kegg.jp/kegg-bin/show_pathway?rno00982+108348148+114846+24423+24426+25750+29253+494500+64352	73	8	3.16318	2.5291	0.0134239	0.0431516	108348148;114846;24423;24426;25750;29253;494500;64352	pathway_KEGG	Gstp1;Gsta3;Gstm5;Gsto1;Gstm1;Gstm3;Maoa;Maob
GO:0045596	negative regulation of cell differentiation	http://amigo.geneontology.org/amigo/term/GO:0045596	470	31	20.3656	1.52217	0.0134395	0.0431516	24832;24923;25183;25529;25595;25613;25742;29409;50646;50686;50864;63836;64202;81732;83572;83765;83782;116590;140908;191575;299858;310192;310533;310635;313644;360840;360921;361532;361596;363064;500988	geneontology_Biological_Process_noRedundant	S100b;Rtn4;Actr3;Ptk2b;Lrp1;Rufy3;Trio;Sirt2;Rapgef2;Nme1;Idh2;Mag;Ntm;Actn4;Srgap2;Ptprs;Nme2;Calr;Mapk1;Rap1gap;Map2;Ptprz1;Wdr61;Gdi1;Cdk5;Stx1b;Ddx6;Thy1;Gsk3a;Pafah1b1;Arhgef2
GO:0045859	regulation of protein kinase activity	http://amigo.geneontology.org/amigo/term/GO:0045859	489	32	21.1889	1.51022	0.0135003	0.0432354	24250;24418;24426;24686;24832;25288;25498;25725;29384;29495;29545;29753;50646;54245;56029;56718;58948;64030;65248;114705;116590;117287;140908;170851;286993;287931;298848;301252;310533;314442;360593;361092	geneontology_Biological_Process_noRedundant	Ppm1e;Dlg3;Uchl1;Park7;Ywhae;Prkar1a;Ptk2b;Acsl1;Hsp90ab1;Gstp1;Cbs;Prnp;Rapgef2;Taok1;Kit;H2afy;Map2k1;Rgs14;Crk;Wars;Mapk1;Ppm1f;Dlg4;Stk24;Srcin1;Grm5;Mapre3;Cdk5;Thy1;Npm1;Prkaa1;Mtor
GO:0046875	ephrin receptor binding	http://amigo.geneontology.org/amigo/term/GO:0046875	22	4	0.953286	4.19601	0.0137099	0.0437945	25150;54245;81504;140908	geneontology_Molecular_Function_noRedundant	Grb2;Fyn;Crk;Cdk5
GO:0016684	oxidoreductase activity, acting on peroxide as acceptor	http://amigo.geneontology.org/amigo/term/GO:0016684	46	6	1.99323	3.01018	0.013864	0.0440615	24248;24426;24440;29328;29338;94167	geneontology_Molecular_Function_noRedundant	Prdx2;Gstp1;Gpx4;Hbb;Prdx6;Cat
rno04978	Mineral absorption	http://www.kegg.jp/kegg-bin/show_pathway?rno04978+24213+24214+29598+29715+79239+84355	46	6	1.99323	3.01018	0.013864	0.0440615	24213;24214;29598;29715;79239;84355	pathway_KEGG	Atp2b1;Hmox2;Slc8a1;Atp1a3;Atox1;Atp1b2
GO:0034248	regulation of cellular amide metabolic process	http://amigo.geneontology.org/amigo/term/GO:0034248	253	19	10.9628	1.73314	0.0142776	0.0452608	24686;25498;50646;56718;64202;65248;79256;81530;84599;89816;116590;287069;287444;292023;296849;304859;308666;362173;497198	geneontology_Biological_Process_noRedundant	Aars;Picalm;Impact;Pdk2;Eif5a;Trap1;Ptk2b;Cyfip1;Prnp;Dhx9;Hnrnpd;Calr;Mapk1;Caprin1;Npm1;Prkaa1;Mtor;Pdk3;Tmed10
GO:0032200	telomere organization	http://amigo.geneontology.org/amigo/term/GO:0032200	74	8	3.20651	2.49493	0.0144987	0.0458454	79256;116590;288620;294864;299809;301252;362361;362809	geneontology_Biological_Process_noRedundant	Cct2;Hnrnpa2b1;Cct6a;Hsp90ab1;Cct5;Hnrnpd;Mapk1;Ptges3
GO:0070646	protein modification by small protein removal	http://amigo.geneontology.org/amigo/term/GO:0070646	104	10	4.50644	2.21905	0.0146746	0.0462842	29545;116643;117287;261736;293705;297593;312710;360471;360915;363445	geneontology_Biological_Process_noRedundant	Usp5;Uchl1;Park7;Cops4;Cops2;Usp7;Cops7a;Otub1;Vcp;Usp9x
GO:0031300	intrinsic component of organelle membrane	http://amigo.geneontology.org/amigo/term/GO:0031300	202	16	8.7529	1.82797	0.0148145	0.0466077	25529;29521;65033;79434;94197;116638;117556;287709;288700;288779;294560;312890;317191;502749;613226;100359982	geneontology_Cellular_Component_noRedundant	Rab5c;Rab5b;Rab11b;Stx12;Sv2b;Agk;Slc6a17;Ptprs;Mpc2;Mcu;Scamp1;Gdap1;Slc17a7;Apool;Rab14;Rab35
GO:0006875	cellular metal ion homeostasis	http://amigo.geneontology.org/amigo/term/GO:0006875	455	30	19.7157	1.52163	0.0149284	0.0468483	24213;24215;24392;24400;24408;24418;24686;24832;25045;25150;25639;25673;29340;29495;29598;29715;29753;50646;60431;64310;64624;84355;114117;140908;287444;291969;294560;314633;317381;685232	geneontology_Biological_Process_noRedundant	Atp2b1;Cul5;Dbi;Prkce;Fkbp1a;Grin1;Atp6v1a;Atp2b2;Ywhae;Eif5a;Anxa5;Ptk2b;Gnb1;Fyn;Prnp;Gja1;Vapb;Ccdc22;Atp6v0d1;Slc8a1;Arf1;Ap3d1;Atp1a3;Gng3;Mcu;Atox1;Dlg4;Grm5;Cdk5;Thy1
GO:1903320	regulation of protein modification by small protein conjugation or removal	http://amigo.geneontology.org/amigo/term/GO:1903320	136	12	5.89304	2.0363	0.0151132	0.0473092	24681;25150;25498;56718;116643;116645;116725;117287;140908;287155;293705;301252	geneontology_Biological_Process_noRedundant	Prkcg;Park7;Fyn;Hsp90ab1;Plaa;Stub1;Cdk5;Otub1;Ube2n;Vcp;Npm1;Mtor
GO:0098739	import across plasma membrane	http://amigo.geneontology.org/amigo/term/GO:0098739	90	9	3.8998	2.30781	0.0158662	0.0495423	24213;24686;25150;29482;29483;29715;50567;89816;171373	geneontology_Biological_Process_noRedundant	Picalm;Slc12a5;Fyn;Prnp;Slc8a1;Slc1a2;Atp1a3;Slc1a3;Slc3a2

## Sheet: sheet_3
geneSet	description	link	size	overlap	expect	enrichmentRatio	pValue	FDR	overlapId	database	userId
GO:0043209	myelin sheath	http://amigo.geneontology.org/amigo/term/GO:0043209	125	16	0.951529	16.815	1.33227e-15	1.664e-12	24211;24547;24551;24943;25176;25416;25617;29144;50664;81829;117596;299923;307382;361071;364208;500929	geneontology_Cellular_Component_noRedundant	Atp6v1b2;Canx;Slc25a5;Sucla2;Tuba1b;Ndrg1;Mbp;Mdh2;Mdh1;Gnao1;Plp1;Atp1a1;Dpysl2;Cnrip1;Napg;Hspa5
rno03010	Ribosome	http://www.kegg.jp/kegg-bin/show_pathway?rno03010+100360647+124323+25348+26962+290641+29284+29288+29304+296709+499782+64307+65043+691531+81775	173	14	1.31692	10.6309	5.18832e-11	3.2401e-08	100360647;124323;25348;26962;290641;29284;29288;29304;296709;499782;64307;65043;691531;81775	pathway_KEGG	LOC100360647;Rps29;Rps28;Rps23;Rps3a;Rps6;Rps14;Rpl14;Rpl35;Rpl24;Rpl8;Rps21;Rpl18a;Rpl12
GO:0098793	presynapse	http://amigo.geneontology.org/amigo/term/GO:0098793	489	18	3.72238	4.83561	2.95374e-08	1.22974e-05	24401;24409;24468;24803;24924;25054;25416;25624;29143;29144;60442;64832;83800;266688;266806;292156;319110;362630	geneontology_Cellular_Component_noRedundant	Vamp2;Ntrk2;Cplx1;Canx;Got1;Hspa8;Lin7c;Ptn;Sh3glb1;Grin2a;Grn;Dpysl2;Vamp1;Hnrnpr;Erc1;Srsf10;Clta;Rab8b
GO:0044306	neuron projection terminus	http://amigo.geneontology.org/amigo/term/GO:0044306	185	10	1.40826	7.10095	1.46601e-06	0.000457761	24401;24409;24468;24803;25054;25416;25624;64832;319110;362630	geneontology_Cellular_Component_noRedundant	Vamp2;Ntrk2;Cplx1;Got1;Hspa8;Grin2a;Dpysl2;Vamp1;Hnrnpr;Srsf10
GO:0048770	pigment granule	http://amigo.geneontology.org/amigo/term/GO:0048770	71	6	0.540468	11.1015	1.63682e-05	0.00329669	24468;29144;29468;56011;117596;363875	geneontology_Cellular_Component_noRedundant	Rac1;Atp6v1b2;Canx;Hspa8;Ywhab;Pdia3
rno04145	Phagosome	http://www.kegg.jp/kegg-bin/show_pathway?rno04145+117596+287876+29144+29214+296554+363875+498736+500377+500929	198	9	1.50722	5.97125	2.02863e-05	0.00329669	117596;287876;29144;29214;296554;363875;498736;500377;500929	pathway_KEGG	Tubb2a;Tubb4b;Rac1;Atp6v1b2;Tubb5;Canx;Tuba1b;Tuba8;Actg1
GO:0005844	polysome	http://amigo.geneontology.org/amigo/term/GO:0005844	45	5	0.34255	14.5964	2.24715e-05	0.00329669	29673;81775;124323;290641;691531	geneontology_Cellular_Component_noRedundant	Rps28;Rps23;Psma6;Rps21;Rpl18a
GO:0005200	structural constituent of cytoskeleton	http://amigo.geneontology.org/amigo/term/GO:0005200	45	5	0.34255	14.5964	2.24715e-05	0.00329669	29214;296554;498736;500377;500929	geneontology_Molecular_Function_noRedundant	Tubb2a;Tubb4b;Tubb5;Tuba1b;Tuba8
GO:0098978	glutamatergic synapse	http://amigo.geneontology.org/amigo/term/GO:0098978	368	12	2.8013	4.28372	2.37551e-05	0.00329669	24409;24468;25054;25624;29144;29433;60442;64832;296710;299923;363875;684527	geneontology_Cellular_Component_noRedundant	Ntrk2;Rac1;Cplx1;Canx;Hspa8;Lin7c;Ndrg1;Pak3;Grin2a;Vamp1;Arpc5l;Crtc1
rno05100	Bacterial invasion of epithelial cells	http://www.kegg.jp/kegg-bin/show_pathway?rno05100+287876+296710+297357+308875+363875+83800	78	6	0.593754	10.1052	2.81126e-05	0.00342933	287876;296710;297357;308875;363875;83800	pathway_KEGG	Rac1;Rhog;Actg1;Arpc5l;Clta;Ctnna2
GO:0003735	structural constituent of ribosome	http://amigo.geneontology.org/amigo/term/GO:0003735	160	8	1.21796	6.56838	3.02022e-05	0.00342933	29284;29288;64307;81775;124323;290641;296709;691531	geneontology_Molecular_Function_noRedundant	Rps28;Rps23;Rps3a;Rps14;Rpl35;Rpl24;Rps21;Rpl18a
GO:0005840	ribosome	http://amigo.geneontology.org/amigo/term/GO:0005840	218	9	1.65947	5.42343	4.32298e-05	0.00449951	29144;29284;29288;64307;81775;124323;290641;296709;691531	geneontology_Cellular_Component_noRedundant	Canx;Rps28;Rps23;Rps3a;Rps14;Rpl35;Rpl24;Rps21;Rpl18a
GO:0048511	rhythmic process	http://amigo.geneontology.org/amigo/term/GO:0048511	277	10	2.10859	4.74251	5.02964e-05	0.00464197	24409;24468;24924;25307;25594;25617;29468;306007;319110;684527	geneontology_Biological_Process_noRedundant	Hspa8;Ptn;Grin2a;Cst3;Ppp1cb;Pdia3;Ccar2;Hnrnpr;Crtc1;Hspa5
rno01200	Carbon metabolism	http://www.kegg.jp/kegg-bin/show_pathway?rno01200+100145871+24401+24551+361071+64304+81829+83688	127	7	0.966753	7.24073	5.20317e-05	0.00464197	100145871;24401;24551;361071;64304;81829;83688	pathway_KEGG	Got1;Sucla2;Taldo1;Mdh2;Mdh1;Adh5;Acads
GO:0009314	response to radiation	http://amigo.geneontology.org/amigo/term/GO:0009314	345	11	2.62622	4.18853	6.46285e-05	0.0053814	24409;24924;25054;25594;25617;29691;295707;296709;300033;306007;684527	geneontology_Biological_Process_noRedundant	Eef1d;Ntrk2;Ptn;Pde1b;Grin2a;Rpl35;Ppp1cb;Ccar2;Crtc1;Tnks1bp1;Hspa5
GO:0044445	cytosolic part	http://amigo.geneontology.org/amigo/term/GO:0044445	233	9	1.77365	5.07428	7.23418e-05	0.00564718	24468;29284;29288;64307;81775;124323;290641;296709;691531	geneontology_Cellular_Component_noRedundant	Hspa8;Rps28;Rps23;Rps3a;Rps14;Rpl35;Rpl24;Rps21;Rpl18a
GO:0003924	GTPase activity	http://amigo.geneontology.org/amigo/term/GO:0003924	237	9	1.8041	4.98864	8.2431e-05	0.00605625	29214;50664;266688;296554;308875;363875;498736;500377;500929	geneontology_Molecular_Function_noRedundant	Tubb2a;Tubb4b;Rac1;Tubb5;Tuba1b;Tuba8;Rhog;Gnao1;Rab8b
GO:0098984	neuron to neuron synapse	http://amigo.geneontology.org/amigo/term/GO:0098984	322	10	2.45114	4.07974	0.00017431	0.0120952	24170;24211;24409;24468;25054;29433;60442;266806;290641;684527	geneontology_Cellular_Component_noRedundant	Ntrk2;Hspa8;Lin7c;Pak3;Grin2a;Atp1a1;Add1;Erc1;Rpl18a;Crtc1
GO:0033267	axon part	http://amigo.geneontology.org/amigo/term/GO:0033267	389	11	2.96116	3.71476	0.000186339	0.0122494	24401;24409;24468;24547;24803;25054;25416;25624;64832;319110;362630	geneontology_Cellular_Component_noRedundant	Vamp2;Ntrk2;Cplx1;Got1;Hspa8;Mbp;Grin2a;Dpysl2;Vamp1;Hnrnpr;Srsf10
GO:0099572	postsynaptic specialization	http://amigo.geneontology.org/amigo/term/GO:0099572	327	10	2.4892	4.01736	0.000197428	0.0123294	24170;24211;24409;24468;25054;29433;60442;266806;290641;684527	geneontology_Cellular_Component_noRedundant	Ntrk2;Hspa8;Lin7c;Pak3;Grin2a;Atp1a1;Add1;Erc1;Rpl18a;Crtc1
GO:0099513	polymeric cytoskeletal fiber	http://amigo.geneontology.org/amigo/term/GO:0099513	464	12	3.53208	3.39744	0.00021616	0.0128564	24468;25416;29214;58845;259242;296554;299923;310544;363875;498736;500377;500929	geneontology_Cellular_Component_noRedundant	Tubb2a;Tubb4b;Rac1;Tubb5;Hspa8;Tuba1b;Wipf3;Map9;Ndrg1;Tuba8;Igbp1;Dpysl2
GO:0099003	vesicle-mediated transport in synapse	http://amigo.geneontology.org/amigo/term/GO:0099003	177	7	1.34736	5.19533	0.000408248	0.0231774	24468;24803;25416;25624;29143;29144;64832	geneontology_Biological_Process_noRedundant	Vamp2;Cplx1;Canx;Hspa8;Grn;Dpysl2;Vamp1
rno05132	Salmonella infection	http://www.kegg.jp/kegg-bin/show_pathway?rno05132+287876+296619+296710+308875+363875	84	5	0.639427	7.8195	0.000448525	0.0243569	287876;296619;296710;308875;363875	pathway_KEGG	Rac1;Rhog;Actg1;Pkn3;Arpc5l
GO:0006457	protein folding	http://amigo.geneontology.org/amigo/term/GO:0006457	131	6	0.997202	6.01683	0.00049346	0.0256805	24468;25617;29144;29468;300257;312640	geneontology_Biological_Process_noRedundant	Pfdn5;Canx;Hspa8;Emc3;Pdia3;Hspa5
rno04540	Gap junction	http://www.kegg.jp/kegg-bin/show_pathway?rno04540+29214+296554+498736+500377+500929	88	5	0.669876	7.46406	0.000555604	0.027758	29214;296554;498736;500377;500929	pathway_KEGG	Tubb2a;Tubb4b;Tubb5;Tuba1b;Tuba8
GO:0005791	rough endoplasmic reticulum	http://amigo.geneontology.org/amigo/term/GO:0005791	90	5	0.685101	7.2982	0.000615836	0.0285276	25054;29144;81775;124323;691531	geneontology_Cellular_Component_noRedundant	Ntrk2;Canx;Rps28;Rps23;Rps21
GO:0104004	cellular response to environmental stimulus	http://amigo.geneontology.org/amigo/term/GO:0104004	248	8	1.88783	4.23766	0.000616689	0.0285276	24211;24401;24924;25617;295707;296709;300033;363875	geneontology_Biological_Process_noRedundant	Eef1d;Rac1;Got1;Ptn;Rpl35;Atp1a1;Tnks1bp1;Hspa5
GO:0001882	nucleoside binding	http://amigo.geneontology.org/amigo/term/GO:0001882	313	9	2.38263	3.77734	0.000647173	0.0288685	29214;50664;266688;296554;308875;363875;498736;500377;500929	geneontology_Molecular_Function_noRedundant	Tubb2a;Tubb4b;Rac1;Tubb5;Tuba1b;Tuba8;Rhog;Gnao1;Rab8b
GO:0019001	guanyl nucleotide binding	http://amigo.geneontology.org/amigo/term/GO:0019001	318	9	2.42069	3.71795	0.000724534	0.031205	29214;50664;266688;296554;308875;363875;498736;500377;500929	geneontology_Molecular_Function_noRedundant	Tubb2a;Tubb4b;Rac1;Tubb5;Tuba1b;Tuba8;Rhog;Gnao1;Rab8b
GO:0031346	positive regulation of cell projection organization	http://amigo.geneontology.org/amigo/term/GO:0031346	321	9	2.44353	3.6832	0.000774472	0.0322438	24924;25054;25617;29143;29433;266688;292156;363875;684527	geneontology_Biological_Process_noRedundant	Ntrk2;Rac1;Ptn;Sh3glb1;Pak3;Grn;Crtc1;Hspa5;Rab8b
rno04144	Endocytosis	http://www.kegg.jp/kegg-bin/show_pathway?rno04144+24468+246310+259242+292156+296710+297995+493810+83800	275	8	2.09336	3.8216	0.00120362	0.0484942	24468;246310;259242;292156;296710;297995;493810;83800	pathway_KEGG	Hspa8;Wipf3;Sh3glb1;Arfgap1;Capza2;Arpc5l;Chmp5;Clta
GO:0043043	peptide biosynthetic process	http://amigo.geneontology.org/amigo/term/GO:0043043	490	11	3.72999	2.94907	0.00127955	0.0493735	29284;29288;64307;81775;124323;288778;290641;296709;300033;319110;691531	geneontology_Biological_Process_noRedundant	Eef1d;Rps28;Rps23;Rps3a;Pa2g4;Rps14;Rpl35;Rpl24;Rps21;Hnrnpr;Rpl18a
GO:0006897	endocytosis	http://amigo.geneontology.org/amigo/term/GO:0006897	418	10	3.18191	3.14276	0.00133168	0.0493735	24170;24468;25416;29143;29144;29364;83800;246310;259242;313785	geneontology_Biological_Process_noRedundant	Cd47;Canx;Hspa8;Wipf3;Icam5;Grn;Arfgap1;Add1;Dpysl2;Clta
rno04721	Synaptic vesicle cycle	http://www.kegg.jp/kegg-bin/show_pathway?rno04721+117596+24803+64832+83800	63	4	0.479571	8.3408	0.00134403	0.0493735	117596;24803;64832;83800	pathway_KEGG	Vamp2;Atp6v1b2;Cplx1;Clta

## Sheet: sheet_4
geneSet	description	link	size	overlap	expect	enrichmentRatio	pValue	FDR	overlapId	database	userId
GO:0098978	glutamatergic synapse	http://amigo.geneontology.org/amigo/term/GO:0098978	368	35	7.87716	4.44322	1.23901e-13	1.54752e-10	24215;24668;24679;25150;25479;25489;25529;25613;29275;29340;29382;29546;29598;29753;56718;59267;59322;64053;64551;79433;81732;83764;114766;116563;116643;117028;140694;170851;171114;293860;303222;303599;305227;310635;316539	geneontology_Cellular_Component_noRedundant	Dlg2;Ptprs;Vcp;Flot2;Phb2;Mtor;Arhgef2;Ndrg2;Myh10;Nedd4;Map2k1;Atp2b1;Ppp1ca;Tanc2;Fyn;Prkce;Epha4;Vps35;Actc1;Bin1;Syt7;Ctbp1;Actr3;Homer1;Sept7;Ap2m1;Sept11;Cnksr2;Prkar2b;Ywhae;Dnm1;Atp2b2;Flna;Ptprz1;Arhgap44
GO:0051186	cofactor metabolic process	http://amigo.geneontology.org/amigo/term/GO:0051186	386	33	8.26246	3.99397	1.21987e-11	7.3499e-09	24159;24248;24423;24439;24479;24534;25014;25062;25150;25604;25630;29224;29411;50671;58917;60666;64300;94173;116599;116643;117287;170465;294320;298942;310392;311254;361596;361884;362440;363159;498909;499422;681913	geneontology_Biological_Process_noRedundant	Pdhx;Vcp;Ldhb;Ndufa9;Mccc2;Acaa2;Idh3B;Park7;Gpd1l;Acat1;Dld;Gpd2;Coq9;Blvra;Fyn;Hpx;Gstz1;Hagh;Cat;Pkm;Fasn;Acly;Ppt1;Pcmt1;Glo1;Idh2;Mthfd1;Gstm1;Idh1;Gpd1;Cbr1;Slc7a11;Gstt3
rno00620	Pyruvate metabolism	http://www.kegg.jp/kegg-bin/show_pathway?rno00620+24439+24534+24552+25014+25104+25630+291450+294320+298942+308100+361042+361602	39	12	0.834808	14.3746	1.76539e-11	7.3499e-09	24439;24534;24552;25014;25104;25630;291450;294320;298942;308100;361042;361602	pathway_KEGG	Ldhb;Pc;Acat1;Dld;Pck2;Hagh;Pkm;Aldh7a1;Glo1;Me3;Me1;Acat2
GO:0098984	neuron to neuron synapse	http://amigo.geneontology.org/amigo/term/GO:0098984	322	28	6.89252	4.06238	3.21756e-10	1.00468e-07	24215;24907;25150;25230;25387;25479;25529;25613;29149;29546;29647;56029;59267;59322;64053;81729;89816;114766;114901;140694;170851;289820;295625;303222;303599;305227;310635;316539	geneontology_Cellular_Component_noRedundant	Dlg2;Ptprs;Strn;Phb2;Actr2;Arhgef2;Arrb1;Map2k1;Tanc2;Fyn;Picalm;Epha4;Vps35;Add3;Cask;Syt7;Homer1;Sorbs2;Pkp4;Sept11;Cnksr2;Rpl10a;Dnm1;Atp2b2;Dmd;Ptprz1;Srcin1;Arhgap44
GO:0099513	polymeric cytoskeletal fiber	http://amigo.geneontology.org/amigo/term/GO:0099513	464	33	9.93208	3.32257	1.50657e-09	3.24527e-07	24392;24852;24907;25150;25152;29167;29275;29489;29715;54319;60328;81655;81732;114114;114514;116685;117028;117550;140694;170851;252902;288444;288620;290640;293860;296284;299809;310635;360950;362587;363288;679312;684352	geneontology_Cellular_Component_noRedundant	Dync1li1;Dnm1l;Tubb1;Kif1a;Kif5b;Arhgef2;Cct6a;Map2k1;Twf2;Macf1;Fyn;Dync1li2;Dync1h1;Cct2;Kif3b;Wdr1;Hsph1;Dctn1;Map1s;Clasp2;Actc1;Bin1;Gja1;Actr3;Slc8a1;Lmnb1;Tpm4;Ezr;Dnm1;Map1a;Mark2;Flna;Dmd
rno01200	Carbon metabolism	http://www.kegg.jp/kegg-bin/show_pathway?rno01200+140547+24248+24399+24479+24552+25014+25104+25630+29562+298942+306586+308100+360975+361596+361602+687008+94173	127	17	2.71848	6.2535	1.74371e-09	3.24527e-07	140547;24248;24399;24479;24552;25014;25104;25630;29562;298942;306586;308100;360975;361596;361602;687008;94173	pathway_KEGG	Echs1;Glud1;Pcca;Pc;Idh3B;Prps1;Acat1;Dld;Ogdh;Cat;Pkm;Amt;Idh2;Me3;Idh1;Me1;Acat2
rno00280	Valine, leucine and isoleucine degradation	http://www.kegg.jp/kegg-bin/show_pathway?rno00280+140547+170465+171155+25014+291450+29592+29711+298942+308100+361884+63938+687008	56	12	1.1987	10.0109	1.81881e-09	3.24527e-07	140547;170465;171155;25014;291450;29592;29711;298942;308100;361884;63938;687008	pathway_KEGG	Echs1;Pcca;Mccc2;Acaa2;Acat1;Dld;Hibadh;Aldh7a1;Hadhb;Bcat1;Bckdhb;Acat2
GO:0099572	postsynaptic specialization	http://amigo.geneontology.org/amigo/term/GO:0099572	327	27	6.99954	3.85739	2.11155e-09	3.29666e-07	24215;24907;25150;25230;25387;25479;25529;25613;29149;29546;29647;56029;59322;64053;81729;89816;114766;114901;140694;170851;289820;295625;303222;303599;305227;310635;316539	geneontology_Cellular_Component_noRedundant	Dlg2;Ptprs;Strn;Phb2;Actr2;Arhgef2;Arrb1;Map2k1;Tanc2;Fyn;Picalm;Epha4;Vps35;Add3;Cask;Homer1;Sorbs2;Pkp4;Sept11;Cnksr2;Rpl10a;Dnm1;Atp2b2;Dmd;Ptprz1;Srcin1;Arhgap44
GO:0032990	cell part morphogenesis	http://amigo.geneontology.org/amigo/term/GO:0032990	428	30	9.16148	3.27458	1.21901e-08	1.62258e-06	24392;24907;25150;25152;25415;25417;25489;25529;25613;29647;56029;60328;65208;79559;81732;84353;89816;114114;170851;171116;289820;290640;291464;299799;301252;303222;310533;316539;497198;684352	geneontology_Biological_Process_noRedundant	Opa1;Ptprs;Hsp90ab1;Dnm1l;Alcam;Actr2;Dpysl4;Nedd4;Map2k1;Twf2;Fyn;Dpysl5;Picalm;Epha4;Map1s;Cask;Gja1;Actr3;Rapgef2;Impact;Ctnnb1;Crmp1;Rab21;Snx2;Map1a;Mark2;Dmd;Ptprz1;Srcin1;Arhgap44
GO:0006520	cellular amino acid metabolic process	http://amigo.geneontology.org/amigo/term/GO:0006520	222	21	4.75198	4.41921	1.2991e-08	1.62258e-06	24399;25014;25604;29592;29711;63938;64300;64313;117287;192172;266975;291624;292023;301544;303306;310392;313047;314442;361884;681913;687008	geneontology_Biological_Process_noRedundant	Oat;Glud1;Pcca;Mccc2;Park7;Farsb;Acat1;Hibadh;Wars;Gstz1;Lars;Sars;Aars;Pcmt1;Bcat1;Mthfd1;Bckdhb;Srr;Yars;Mpst;Slc7a11
GO:0001882	nucleoside binding	http://amigo.geneontology.org/amigo/term/GO:0001882	313	25	6.69987	3.73142	1.65933e-08	1.88409e-06	24399;24525;25740;26956;29562;56003;63836;64551;83788;114114;116546;117515;140694;171116;171337;287606;287709;288779;291006;293481;299799;301252;305227;366826;679312	geneontology_Molecular_Function_noRedundant	Glud1;Opa1;Sept2;Hsp90ab1;Rab5b;Dnm1l;Tubb1;Prps1;Rab5c;Sept3;Sept9;Rap1b;Diras2;Ralb;Kras;Gnaz;Sept7;Sept11;Diras1;Tufm;Rab21;Dnm1;Ak3;Sept4;Actn4
GO:0016358	dendrite development	http://amigo.geneontology.org/amigo/term/GO:0016358	189	19	4.04561	4.69645	2.42611e-08	2.52517e-06	25150;25152;25489;25529;25613;29149;29647;56029;56718;81732;89816;114114;171116;289820;290640;299799;303222;310533;316539	geneontology_Biological_Process_noRedundant	Opa1;Ptprs;Strn;Dnm1l;Mtor;Actr2;Nedd4;Fyn;Picalm;Epha4;Map1s;Cask;Actr3;Rapgef2;Rab21;Map1a;Ptprz1;Srcin1;Arhgap44
GO:0016614	oxidoreductase activity, acting on CH-OH group of donors	http://amigo.geneontology.org/amigo/term/GO:0016614	118	15	2.52583	5.93864	3.26274e-08	3.13474e-06	24479;24534;25062;29224;29382;50671;60666;63938;79244;94173;117099;171155;361596;361602;363159	geneontology_Molecular_Function_noRedundant	Hsd17b4;Ldhb;Idh3B;Gpd1l;Gpd2;Hibadh;Ctbp1;Bdh1;Fasn;Hadhb;Idh2;Me3;Idh1;Gpd1;Cbr1
GO:0003924	GTPase activity	http://amigo.geneontology.org/amigo/term/GO:0003924	237	21	5.07306	4.13951	4.08576e-08	3.64508e-06	24400;24525;25740;56003;64551;83788;114114;116546;117515;140694;171116;171337;287606;287709;288779;291006;293481;299799;305227;366826;679312	geneontology_Molecular_Function_noRedundant	Opa1;Sept2;Rab5b;Dnm1l;Tubb1;Gnb1;Rab5c;Sept3;Sept9;Rap1b;Diras2;Ralb;Kras;Gnaz;Sept7;Sept11;Diras1;Tufm;Rab21;Dnm1;Sept4
GO:1990204	oxidoreductase complex	http://amigo.geneontology.org/amigo/term/GO:1990204	89	13	1.90507	6.82388	5.09365e-08	4.24131e-06	25062;29711;60666;64539;94173;117287;293991;298942;301123;311254;361385;362440;363159	geneontology_Cellular_Component_noRedundant	Pdhx;Ndufa9;Ndufa11;Ndufb8;Idh3B;Park7;Gpd1l;Dld;Gpd2;Ndufv3;Ndufb7;Bckdhb;Gpd1
GO:0050803	regulation of synapse structure or activity	http://amigo.geneontology.org/amigo/term/GO:0050803	201	19	4.30247	4.41607	6.56002e-08	5.12092e-06	25150;25479;25489;25529;29546;29647;56029;79433;81732;89816;114114;116643;140694;171116;289820;303222;305227;310392;316539	geneontology_Biological_Process_noRedundant	Opa1;Ptprs;Vcp;Dnm1l;Actr2;Myh10;Nedd4;Fyn;Picalm;Epha4;Vps35;Cask;Actr3;Homer1;Sept11;Dnm1;Slc7a11;Srcin1;Arhgap44
GO:0019001	guanyl nucleotide binding	http://amigo.geneontology.org/amigo/term/GO:0019001	318	24	6.8069	3.52584	9.48015e-08	6.96512e-06	24399;24525;25740;26956;29562;56003;64551;83788;114114;116546;117515;140694;171116;171337;287606;287709;288779;291006;293481;299799;301252;305227;366826;679312	geneontology_Molecular_Function_noRedundant	Glud1;Opa1;Sept2;Hsp90ab1;Rab5b;Dnm1l;Tubb1;Prps1;Rab5c;Sept3;Sept9;Rap1b;Diras2;Ralb;Kras;Gnaz;Sept7;Sept11;Diras1;Tufm;Rab21;Dnm1;Ak3;Sept4
GO:0006753	nucleoside phosphate metabolic process	http://amigo.geneontology.org/amigo/term/GO:0006753	455	29	9.73943	2.97759	1.68102e-07	1.16644e-05	24159;24479;24534;25014;25062;25282;25630;26956;29562;50671;60666;64300;94173;114114;116643;117272;117287;170465;170851;171116;293991;298942;303179;311254;361596;361884;363159;498909;100363253	geneontology_Biological_Process_noRedundant	Prpsap2;Opa1;Pdhx;Vcp;Dnm1l;Ldhb;Nt5c2;Mccc2;Ndufb8;Acaa2;Map2k1;Idh3B;Park7;Prps1;Gpd1l;Acat1;Dld;Gpd2;Coq9;Pkm;Fasn;Acly;Guk1;Idh2;Mthfd1;Ak3;Idh1;Gpd1;Cox6a1
GO:0106027	neuron projection organization	http://amigo.geneontology.org/amigo/term/GO:0106027	68	11	1.45556	7.55721	1.88902e-07	1.24178e-05	25150;25479;29546;29647;56029;81732;114114;171116;289820;303222;316539	geneontology_Biological_Process_noRedundant	Opa1;Dnm1l;Actr2;Fyn;Epha4;Vps35;Cask;Actr3;Homer1;Srcin1;Arhgap44
GO:0098793	presynapse	http://amigo.geneontology.org/amigo/term/GO:0098793	489	30	10.4672	2.86609	2.32876e-07	1.45431e-05	24215;24415;24668;24907;25479;25529;29340;29382;29411;29598;29647;56003;59267;64516;83764;89816;114114;114766;116563;117028;140694;287606;287709;288779;303222;315676;316539;360915;363288;687090	geneontology_Cellular_Component_noRedundant	Ptprs;Rab5b;Dnm1l;Grm2;Flot2;Phb2;Kif1a;Atp2b1;Ppp1ca;Rab5c;Dmxl2;Sept3;Picalm;Prkce;Epha4;Vps35;Cask;Bin1;Syt7;Ctbp1;Ppt1;Ap2m1;Cops4;Dnm1;Tprg1l;Atp2b2;Sept4;Dmd;Arhgap44;Vps45
GO:0060627	regulation of vesicle-mediated transport	http://amigo.geneontology.org/amigo/term/GO:0060627	363	25	7.77014	3.21745	2.9395e-07	1.7483e-05	24367;25387;25489;25528;29340;29411;54319;59267;63836;89816;114114;116546;116563;117028;117550;140694;170851;171337;287606;287709;288779;298771;299799;299858;311193	geneontology_Biological_Process_noRedundant	Arhgap1;Lrp1;Rab5b;Dnm1l;Kif5b;Sirpa;Arrb1;Nedd4;Map2k1;Rab5c;Prepl;Picalm;Prkce;Rap1b;Bin1;Syt7;Ralb;Ppt1;Ap2m1;Rab21;Ezr;Dnm1;Fgg;Sept4;Actn4
rno00020	Citrate cycle (TCA cycle)	http://www.kegg.jp/kegg-bin/show_pathway?rno00020+24159+24479+25104+298942+360975+361042+361596+94173	33	8	0.706376	11.3254	3.52481e-07	2.00113e-05	24159;24479;25104;298942;360975;361042;361596;94173	pathway_KEGG	Pc;Idh3B;Dld;Ogdh;Pck2;Acly;Idh2;Idh1
GO:0015629	actin cytoskeleton	http://amigo.geneontology.org/amigo/term/GO:0015629	319	23	6.8283	3.36833	3.98839e-07	2.16587e-05	24852;25150;29167;29275;54319;56029;60328;63836;79433;81634;81732;81824;83764;113960;289820;293860;305227;310635;314212;360950;362587;501083;684352	geneontology_Cellular_Component_noRedundant	Flot2;Pdcd6ip;Daam1;Cdc42bpb;Actr2;Arhgef2;Arpc1a;Myh10;Twf2;Macf1;Fyn;Wdr1;Dctn1;Actc1;Actr3;Sept11;Tpm4;Actn1;Ezr;Mark2;Flna;Actn4;Srcin1
GO:0050808	synapse organization	http://amigo.geneontology.org/amigo/term/GO:0050808	296	22	6.33598	3.47223	4.2819e-07	2.22837e-05	25150;25479;25489;25529;29546;29647;56029;59322;64551;79433;81732;89816;114114;116643;171114;171116;289820;303222;305227;310392;316539;361833	geneontology_Biological_Process_noRedundant	Opa1;Ptprs;Vcp;Dnm1l;Actr2;Ndrg2;Myh10;Nedd4;Fyn;Picalm;Epha4;Vps35;Cask;Actr3;Homer1;Ank3;Sept7;Sept11;Cnksr2;Slc7a11;Srcin1;Arhgap44
rno04144	Endocytosis	http://www.kegg.jp/kegg-bin/show_pathway?rno04144+116563+117028+117550+140694+25387+25479+25489+287709+288779+291464+291553+292640+306380+311024+314764+501083+50993+54190+64516+682507+81824	275	21	5.88647	3.5675	5.05469e-07	2.52532e-05	116563;117028;117550;140694;25387;25479;25489;287709;288779;291464;291553;292640;306380;311024;314764;501083;50993;54190;64516;682507;81824	pathway_KEGG	Rab5b;Pdcd6ip;Kif5b;Arpc1a;Nedd4l;Arrb1;Nedd4;Eea1;Rab5c;Vps35;Bin1;Rab10;Wasl;Ap2m1;Vta1;Psd3;Snx2;Dnm1;Rabep1;Kif5c;Vps45
GO:1905368	peptidase complex	http://amigo.geneontology.org/amigo/term/GO:1905368	75	11	1.6054	6.85187	5.28168e-07	2.53724e-05	29614;29669;29677;85492;116643;117262;117263;287772;287984;289990;296651	geneontology_Cellular_Component_noRedundant	Vcp;Psmc3;Psma2;Psmd2;Psmc6;Psmc4;Psmc1;Psmd12;Psmd5;Psme2;Psmb7
rno03050	Proteasome	http://www.kegg.jp/kegg-bin/show_pathway?rno03050+117262+117263+287772+287984+289990+29614+29669+29677+85492	48	9	1.02746	8.7595	6.80204e-07	3.14657e-05	117262;117263;287772;287984;289990;29614;29669;29677;85492	pathway_KEGG	Psmc3;Psma2;Psmd2;Psmc6;Psmc4;Psmc1;Psmd12;Psme2;Psmb7
GO:0015631	tubulin binding	http://amigo.geneontology.org/amigo/term/GO:0015631	235	19	5.03025	3.77715	7.53421e-07	3.31891e-05	24392;25150;25152;29167;54319;65179;65208;114114;114514;117550;140694;171116;288444;290640;296284;310635;362587;363288;100361417	geneontology_Molecular_Function_noRedundant	Opa1;Dnm1l;Kif1a;Kif5b;Arhgef2;Macf1;Fyn;Dpysl5;Kif3b;Hsph1;Dctn1;Map1s;Clasp2;Ppp5c;Gja1;Ezr;Dnm1;Map1a;Tbcd
rno04530	Tight junction	http://www.kegg.jp/kegg-bin/show_pathway?rno04530+24582+24672+25489+289820+291553+29340+310533+310635+362298+54319+63836+64053+682507+79433+81634+81732	170	16	3.63891	4.39692	7.70603e-07	3.31891e-05	24582;24672;25489;289820;291553;29340;310533;310635;362298;54319;63836;64053;682507;79433;81634;81732	pathway_KEGG	Dlg2;Actr2;Arhgef2;Nedd4l;Myh10;Nedd4;Prkce;Actr3b;Actr3;Rapgef2;Wasl;Actn1;Ezr;Ppp2ca;Actn4;Myh11
GO:0051640	organelle localization	http://amigo.geneontology.org/amigo/term/GO:0051640	416	26	8.90462	2.91983	1.0852e-06	4.26896e-05	24186;24907;25498;29167;29340;29489;54319;59267;63836;64516;81655;83809;89816;114114;116546;117550;140694;170851;171116;171337;171455;289820;298771;308777;310635;363288	geneontology_Biological_Process_noRedundant	Opa1;Dnm1l;Actr2;Kif1a;Kif5b;Arhgef2;Npm1;Map2k1;Prepl;Dync1li2;Picalm;Prkce;Dync1h1;Dctn1;Rap1b;Syt7;Ralb;Alb;Ap3b2;Ezr;Dnm1;Nsfl1c;Actn4;Dmd;Exoc2;Vps45
GO:1903827	regulation of cellular protein localization	http://amigo.geneontology.org/amigo/term/GO:1903827	338	23	7.235	3.17899	1.09373e-06	4.26896e-05	25150;25479;25498;29167;29384;29753;54319;81732;83809;84353;84595;116546;117287;117550;170851;288620;293860;299809;299858;301252;310392;361833;363159	geneontology_Biological_Process_noRedundant	Lrp1;Hsp90ab1;Kif5b;Npm1;Cct6a;Map2k1;Park7;Gpd1l;Fyn;Vps35;Cct2;Dctn1;H2afy;Ralb;Actr3;Ank3;Ctnnb1;Ezr;Ywhae;Nsfl1c;Flna;Nucb1;Slc7a11
GO:0099568	cytoplasmic region	http://amigo.geneontology.org/amigo/term/GO:0099568	338	23	7.235	3.17899	1.09373e-06	4.26896e-05	24852;29167;54319;56003;63836;64551;81634;83764;83788;84353;117515;117550;170851;171455;287606;289820;293860;299799;305227;308777;360950;363288;499913	geneontology_Cellular_Component_noRedundant	Sept2;Flot2;Actr2;Kif1a;Kif5b;Map2k1;Abhd12;Sept3;Sept9;Wdr1;Dctn1;Sept7;Sept11;Tpm4;Ctnnb1;Ap3b2;Rab21;Actn1;Ezr;Sept4;Flna;Actn4;Exoc2
GO:0007017	microtubule-based process	http://amigo.geneontology.org/amigo/term/GO:0007017	499	29	10.6813	2.71503	1.13128e-06	4.28171e-05	24392;25152;25415;25498;29167;29489;54319;60328;81655;83764;83809;84353;114514;116643;116670;117550;170851;252902;289820;290640;293860;296284;299799;308777;310635;362587;363288;679312;100361417	geneontology_Biological_Process_noRedundant	Dync1li1;Vcp;Flot2;Tubb1;Actr2;Kif1a;Kif5b;Arhgef2;Npm1;Map2k1;Macf1;Dync1li2;Dync1h1;Kif3b;Dctn1;Map1s;Clasp2;Gja1;Ctnnb1;Crmp1;Ap3b2;Rab21;Ezr;Map1a;Nsfl1c;Ppp1r12a;Mark2;Flna;Tbcd
GO:0032386	regulation of intracellular transport	http://amigo.geneontology.org/amigo/term/GO:0032386	296	21	6.33598	3.3144	1.6699e-06	6.13443e-05	25150;29167;29340;29489;29753;54319;59267;81732;84595;89816;114114;117287;117550;170851;171337;293860;298771;299799;301252;311193;361833	geneontology_Biological_Process_noRedundant	Arhgap1;Hsp90ab1;Dnm1l;Kif5b;Map2k1;Park7;Fyn;Prepl;Picalm;Prkce;Dync1h1;Dctn1;Rap1b;Syt7;Actr3;Ank3;Rab21;Ezr;Ywhae;Flna;Nucb1
GO:0022604	regulation of cell morphogenesis	http://amigo.geneontology.org/amigo/term/GO:0022604	348	23	7.44906	3.08764	1.80162e-06	6.4292e-05	25150;25489;25529;25613;29647;54319;56029;60328;63836;64551;79433;81732;89816;114114;171116;289820;293860;299799;303222;310533;316539;360950;684352	geneontology_Biological_Process_noRedundant	Opa1;Ptprs;Dnm1l;Actr2;Myh10;Nedd4;Twf2;Fyn;Picalm;Epha4;Wdr1;Cask;Actr3;Rapgef2;Sept7;Rab21;Ezr;Mark2;Flna;Actn4;Ptprz1;Srcin1;Arhgap44
GO:0044309	neuron spine	http://amigo.geneontology.org/amigo/term/GO:0044309	182	16	3.89577	4.10702	1.91268e-06	6.63593e-05	24668;24679;25387;25489;25613;29149;29546;29598;29715;81634;140694;192361;303222;305227;316539;317385	geneontology_Cellular_Component_noRedundant	Strn;Arrb1;Nedd4;Atp2b1;Ppp1ca;Ppp1r2;Epha4;Homer1;Slc8a1;Sept11;Prkar2b;Actn1;Dnm1;Ptprz1;Fus;Arhgap44
GO:0000904	cell morphogenesis involved in differentiation	http://amigo.geneontology.org/amigo/term/GO:0000904	462	27	9.88926	2.73023	2.42103e-06	8.09734e-05	25150;25152;25415;25489;25529;25613;29647;56029;60328;63836;65208;79559;81732;89816;114114;171116;289820;290640;293860;299799;301252;303222;310533;316539;360950;684352;100361417	geneontology_Biological_Process_noRedundant	Opa1;Ptprs;Hsp90ab1;Dnm1l;Alcam;Actr2;Nedd4;Twf2;Fyn;Dpysl5;Picalm;Epha4;Wdr1;Map1s;Cask;Actr3;Rapgef2;Crmp1;Rab21;Map1a;Mark2;Flna;Tbcd;Actn4;Ptprz1;Srcin1;Arhgap44
GO:0072521	purine-containing compound metabolic process	http://amigo.geneontology.org/amigo/term/GO:0072521	381	24	8.15543	2.94282	2.4848e-06	8.09734e-05	24159;25014;25282;25604;25630;26956;29562;50671;60666;64300;114114;116643;117272;117287;170465;170851;171116;293991;298942;303179;311254;361884;498909;100363253	geneontology_Biological_Process_noRedundant	Prpsap2;Opa1;Pdhx;Vcp;Dnm1l;Nt5c2;Mccc2;Ndufb8;Acaa2;Map2k1;Park7;Prps1;Acat1;Dld;Coq9;Pkm;Fasn;Acly;Pcmt1;Guk1;Mthfd1;Ak3;Gpd1;Cox6a1
GO:0003779	actin binding	http://amigo.geneontology.org/amigo/term/GO:0003779	279	20	5.97209	3.34891	2.52839e-06	8.09734e-05	24852;24907;25152;25230;29340;54319;63836;79433;81634;81732;81824;289820;290640;293860;300768;314212;360950;362587;497198;684352	geneontology_Molecular_Function_noRedundant	Daam1;Actr2;Arpc1a;Myh10;Twf2;Macf1;Prkce;Wdr1;Add3;Map1s;Actr3;Impact;Tpm4;Actn1;Ezr;Map1a;Coro2b;Flna;Actn4;Dmd
GO:0005759	mitochondrial matrix	http://amigo.geneontology.org/amigo/term/GO:0005759	239	18	5.11588	3.51846	4.05765e-06	0.000124983	24399;24439;25014;25104;26956;29711;64313;94173;117099;170465;171155;293481;298942;300726;361884;362440;362776;687008	geneontology_Cellular_Component_noRedundant	Oat;Glud1;Pcca;Pc;Ndufa9;Mccc2;Acaa2;Idh3B;Acat1;Dld;Hagh;Etfa;Bdh1;Hadhb;Tufm;Bckdhb;Glrx5;Ak3
rno00640	Propanoate metabolism	http://www.kegg.jp/kegg-bin/show_pathway?rno00640+140547+24534+25014+29711+298942+308100+687008	32	7	0.684971	10.2194	4.10272e-06	0.000124983	140547;24534;25014;29711;298942;308100;687008	pathway_KEGG	Echs1;Ldhb;Pcca;Acat1;Dld;Bckdhb;Acat2
GO:0032787	monocarboxylic acid metabolic process	http://amigo.geneontology.org/amigo/term/GO:0032787	422	25	9.03305	2.76761	4.55719e-06	0.000135522	24159;24439;24479;24534;24679;25014;25104;25630;29224;29254;50671;56718;60666;79244;117287;170465;171155;298942;300726;303306;308100;311254;361596;361602;687008	geneontology_Biological_Process_noRedundant	Pdhx;Hsd17b4;Ldhb;Pcca;Pc;Mtor;Mgll;Acaa2;Park7;Acat1;Dld;Hagh;Etfa;Pkm;Fasn;Acly;Prkar2b;Hadhb;Idh2;Srr;Me3;Idh1;Gpd1;Cbr1;Acat2
GO:0006091	generation of precursor metabolites and energy	http://amigo.geneontology.org/amigo/term/GO:0006091	304	20	6.50722	3.07351	9.18981e-06	0.000255642	24248;24479;24668;25014;25282;25630;56718;60666;94173;116643;117287;192361;293991;298942;300726;308100;361596;362029;362776;498909	geneontology_Biological_Process_noRedundant	Vcp;Mtor;Agl;Ndufb8;Idh3B;Park7;Ppp1ca;Acat1;Dld;Coq9;Ppp1r2;Etfa;Cat;Pkm;Idh2;Glrx5;Idh1;Gpd1;Cox6a1;Acat2
GO:0005740	mitochondrial envelope	http://amigo.geneontology.org/amigo/term/GO:0005740	497	27	10.6385	2.53796	9.32162e-06	0.000255642	24248;24392;24907;25035;25282;26956;29154;56718;64539;114114;114766;117099;117287;171116;171139;171155;261737;288150;293991;300111;301123;312444;315167;316539;361385;362440;498909	geneontology_Cellular_Component_noRedundant	Opa1;Dnm1l;Cyb5r3;Ndufa6;Phb2;Mtor;Ndufa9;Ndufa11;Ndufb8;Park7;Immt;Coq9;Epha4;Mtx2;Ndufv3;Samm50;Ndufb7;Cat;Gja1;Bdh1;Hadhb;Capn2;Sfxn5;Ak3;Dmd;Timm9;Cox6a1
GO:0048037	cofactor binding	http://amigo.geneontology.org/amigo/term/GO:0048037	440	25	9.41835	2.65439	9.41083e-06	0.000255642	24159;24186;24248;24423;24479;24534;25014;25035;25104;29382;50671;60666;63938;64313;94173;171155;298942;300726;303306;361596;361602;362454;362776;362782;363159	geneontology_Molecular_Function_noRedundant	Oat;Cyb5r3;Ldhb;Pc;Idh3B;Gpd1l;Acat1;Dld;Cyp46a1;Hibadh;Hebp1;Etfa;Cat;Ctbp1;Fasn;Acly;Alb;Hadhb;Idh2;Gstm1;Srr;Glrx5;Me3;Idh1;Gpd1
GO:0042176	regulation of protein catabolic process	http://amigo.geneontology.org/amigo/term/GO:0042176	254	18	5.43696	3.31068	9.44815e-06	0.000255642	24392;25150;25479;25489;29614;29677;54319;116643;117262;117263;287984;289990;293860;297593;299858;301252;316539;317381	geneontology_Biological_Process_noRedundant	Lrp1;Hsp90ab1;Ccdc22;Vcp;Psmc3;Nedd4;Usp5;Fyn;Epha4;Vps35;Psmd2;Psmc6;Psmc4;Psmc1;Gja1;Psme2;Ezr;Flna
GO:0043648	dicarboxylic acid metabolic process	http://amigo.geneontology.org/amigo/term/GO:0043648	82	10	1.75524	5.69723	9.61984e-06	0.000255642	24399;24479;25104;64300;64313;94173;298942;310392;361596;361602	geneontology_Biological_Process_noRedundant	Oat;Glud1;Pc;Idh3B;Dld;Idh2;Mthfd1;Me3;Idh1;Slc7a11
GO:0016874	ligase activity	http://amigo.geneontology.org/amigo/term/GO:0016874	120	12	2.56864	4.67173	1.00907e-05	0.000262568	25014;25104;64300;266975;291624;292023;300968;301544;313047;314442;361884;687008	geneontology_Molecular_Function_noRedundant	Pcca;Pc;Mccc2;Uba5;Farsb;Acat1;Wars;Lars;Sars;Aars;Mthfd1;Yars
GO:0019693	ribose phosphate metabolic process	http://amigo.geneontology.org/amigo/term/GO:0019693	360	22	7.70592	2.85495	1.06119e-05	0.000270495	24159;25014;25282;25630;26956;29562;50671;60666;114114;116643;117272;117287;170465;170851;171116;293991;298942;303179;311254;361884;498909;100363253	geneontology_Biological_Process_noRedundant	Prpsap2;Opa1;Pdhx;Vcp;Dnm1l;Nt5c2;Mccc2;Ndufb8;Acaa2;Map2k1;Park7;Prps1;Acat1;Dld;Coq9;Pkm;Fasn;Acly;Guk1;Ak3;Gpd1;Cox6a1
GO:0051493	regulation of cytoskeleton organization	http://amigo.geneontology.org/amigo/term/GO:0051493	361	22	7.72733	2.84704	1.10835e-05	0.000276866	25152;25230;25498;29154;29167;29340;29489;56718;60328;81732;81824;83809;84353;114514;252902;289820;293860;303222;310635;360950;684352;100361417	geneontology_Biological_Process_noRedundant	Dync1li1;Mtor;Actr2;Arhgef2;Arpc1a;Npm1;Twf2;Prkce;Dync1h1;Wdr1;Add3;Dctn1;Clasp2;Actr3;Ctnnb1;Capn2;Map1a;Nsfl1c;Mark2;Flna;Tbcd;Arhgap44
GO:0044282	small molecule catabolic process	http://amigo.geneontology.org/amigo/term/GO:0044282	258	18	5.52258	3.25935	1.16991e-05	0.000286512	24399;24439;25014;25062;29224;29711;56718;63938;64313;79244;170465;171155;300726;308100;361884;362782;681913;687008	geneontology_Biological_Process_noRedundant	Oat;Glud1;Hsd17b4;Pcca;Mtor;Mccc2;Acaa2;Acat1;Gpd2;Cyp46a1;Hibadh;Gstz1;Hagh;Etfa;Hadhb;Bckdhb;Cbr1;Acat2
GO:0070201	regulation of establishment of protein localization	http://amigo.geneontology.org/amigo/term/GO:0070201	476	26	10.1889	2.55179	1.2466e-05	0.000299424	24367;24392;24399;25150;25387;25479;29167;29647;29753;54319;56029;59267;81732;84595;89816;114114;117287;117550;288620;293860;299809;299858;301252;310392;361596;361833	geneontology_Biological_Process_noRedundant	Glud1;Lrp1;Hsp90ab1;Dnm1l;Kif5b;Cct6a;Arrb1;Park7;Fyn;Picalm;Vps35;Cct2;Dctn1;Cask;Syt7;Gja1;Actr3;Ank3;Idh2;Ezr;Ywhae;Fgg;Flna;Nucb1;Slc7a11;Srcin1
GO:0097435	supramolecular fiber organization	http://amigo.geneontology.org/amigo/term/GO:0097435	449	25	9.611	2.60119	1.32977e-05	0.000313373	24852;25152;25230;25387;29167;29275;29340;29345;29489;54319;56718;63836;79433;81634;81732;81824;114514;114901;289820;293860;301252;310635;360950;684352;100361417	geneontology_Biological_Process_noRedundant	Hsp90ab1;Serpinh1;Mtor;Actr2;Arhgef2;Arpc1a;Arrb1;Myh10;Twf2;Prkce;Dync1h1;Wdr1;Add3;Dctn1;Clasp2;Actc1;Actr3;Sorbs2;Tpm4;Actn1;Ezr;Map1a;Flna;Tbcd;Actn4
GO:0006790	sulfur compound metabolic process	http://amigo.geneontology.org/amigo/term/GO:0006790	212	16	4.53793	3.52584	1.35923e-05	0.000314385	24159;24423;24439;24479;25014;25604;50671;64300;170465;192172;294320;298942;310392;311254;499422;681913	geneontology_Biological_Process_noRedundant	Pdhx;Acaa2;Acat1;Dld;Gstz1;Hagh;Fasn;Acly;Pcmt1;Glo1;Mthfd1;Gstm1;Idh1;Mpst;Slc7a11;Gstt3
GO:0010638	positive regulation of organelle organization	http://amigo.geneontology.org/amigo/term/GO:0010638	369	22	7.89857	2.78531	1.55952e-05	0.000354154	24654;25387;25479;25498;29167;29340;29384;29489;56718;59267;81732;81824;83809;114114;117550;171116;288620;289350;289820;293860;299809;360950	geneontology_Biological_Process_noRedundant	Opa1;Plcb1;Dnm1l;Mtor;Actr2;Kif5b;Arpc1a;Npm1;Cct6a;Arrb1;Prkce;Dync1h1;Vps35;Cct2;Wdr1;Dctn1;Syt7;H2afy;Actr3;Rab3gap2;Nsfl1c;Flna
GO:0043254	regulation of protein complex assembly	http://amigo.geneontology.org/amigo/term/GO:0043254	290	19	6.20755	3.06079	1.63192e-05	0.000363976	25230;25479;29167;29340;29677;56718;81732;81824;114114;116546;116643;117262;289820;289990;310635;314442;497198;684352;100361417	geneontology_Biological_Process_noRedundant	Vcp;Dnm1l;Mtor;Psmc3;Actr2;Arhgef2;Arpc1a;Twf2;Prkce;Vps35;Wars;Add3;Dctn1;Psmc6;Psmc4;Ralb;Actr3;Impact;Tbcd
GO:0072657	protein localization to membrane	http://amigo.geneontology.org/amigo/term/GO:0072657	371	22	7.94138	2.7703	1.69558e-05	0.00037154	25150;25479;29647;54190;54319;64053;81732;83764;117550;170851;171139;171444;293860;294708;299858;300111;303222;310392;316415;361833;362587;363707	geneontology_Biological_Process_noRedundant	Dlg2;Lrp1;Pacs1;Flot2;Kif5b;Map2k1;Fam126b;Macf1;Fyn;Vps35;Samm50;Cask;Actr3;Ank3;Sgtb;Srp68;Ezr;Rabep1;Flna;Timm9;Slc7a11;Arhgap44
GO:0043198	dendritic shaft	http://amigo.geneontology.org/amigo/term/GO:0043198	54	8	1.15589	6.92109	1.78655e-05	0.000384724	24679;25152;29546;29715;84353;293860;310635;316539	geneontology_Cellular_Component_noRedundant	Arhgef2;Epha4;Homer1;Slc8a1;Prkar2b;Ctnnb1;Map1a;Flna
GO:0006575	cellular modified amino acid metabolic process	http://amigo.geneontology.org/amigo/term/GO:0006575	129	12	2.76129	4.3458	2.1088e-05	0.000446422	24423;24439;24479;25604;64300;117287;291450;294320;310392;499422;499913;681913	geneontology_Biological_Process_noRedundant	Park7;Abhd12;Gstz1;Hagh;Aldh7a1;Pcmt1;Glo1;Mthfd1;Gstm1;Idh1;Slc7a11;Gstt3
GO:0051603	proteolysis involved in cellular protein catabolic process	http://amigo.geneontology.org/amigo/term/GO:0051603	497	26	10.6385	2.44396	2.62529e-05	0.000546497	25387;25489;29154;29614;29669;29677;64624;83809;85492;116643;117262;117263;246216;287367;287772;287984;289990;294708;297593;301252;316539;317381;360471;361970;362862;100912032	geneontology_Biological_Process_noRedundant	Hsp90ab1;Ccdc22;Vcp;Psmc3;Arrb1;Nedd4;Psma2;Usp5;Usp7;Hsp90b1;Epha4;Psmd2;Cul5;Psmc6;Psmc4;Psmc1;Psmd12;Trim2;Sgtb;Capn2;Psme2;Nsfl1c;Psmb7;Cops3;Rps27a;Prpf19
GO:0070997	neuron death	http://amigo.geneontology.org/amigo/term/GO:0070997	275	18	5.88647	3.05786	2.75999e-05	0.00056512	24525;25150;25387;25417;25479;25498;25613;29154;29411;56718;65179;89816;117287;292023;299858;301252;310392;361970	geneontology_Biological_Process_noRedundant	Lrp1;Hsp90ab1;Mtor;Npm1;Dpysl4;Arrb1;Park7;Fyn;Picalm;Vps35;Ppp5c;Kras;Trim2;Aars;Ppt1;Capn2;Ptprz1;Slc7a11
GO:0031252	cell leading edge	http://amigo.geneontology.org/amigo/term/GO:0031252	276	18	5.90787	3.04678	2.89603e-05	0.000583411	24907;25613;29275;29598;54319;56029;79433;81634;81732;83764;113960;114514;114901;289820;303222;310635;362587;684352	geneontology_Cellular_Component_noRedundant	Flot2;Cdc42bpb;Actr2;Arhgef2;Myh10;Atp2b1;Twf2;Macf1;Clasp2;Actc1;Actr3;Sorbs2;Actn1;Ezr;Dmd;Ptprz1;Srcin1;Arhgap44
GO:0016042	lipid catabolic process	http://amigo.geneontology.org/amigo/term/GO:0016042	228	16	4.88042	3.27841	3.33469e-05	0.000661115	24479;24654;25014;29224;29254;29411;56718;64189;79244;170465;171155;300726;308100;362782;499913;687008	geneontology_Biological_Process_noRedundant	Plcb1;Hsd17b4;Pcca;Mtor;Mgll;Acaa2;Acat1;Abhd12;Cyp46a1;Pafah1b2;Etfa;Ppt1;Hadhb;Idh1;Cbr1;Acat2
rno00630	Glyoxylate and dicarboxylate metabolism	http://www.kegg.jp/kegg-bin/show_pathway?rno00630+24248+25014+298942+306586+308100+687008	30	6	0.64216	9.34347	3.53566e-05	0.000690005	24248;25014;298942;306586;308100;687008	pathway_KEGG	Pcca;Acat1;Dld;Cat;Amt;Acat2
GO:0051301	cell division	http://amigo.geneontology.org/amigo/term/GO:0051301	308	19	6.59284	2.88191	3.74933e-05	0.000720447	24248;24668;29167;29340;29489;56003;64551;83788;114514;116546;117515;252902;287606;289820;295625;296284;305227;310635;501083	geneontology_Biological_Process_noRedundant	Sept2;Dync1li1;Pdcd6ip;Actr2;Arhgef2;Ppp1ca;Sept3;Sept9;Prkce;Dync1h1;Kif3b;Dctn1;Clasp2;Cat;Ralb;Sept7;Pkp4;Sept11;Sept4
GO:0097060	synaptic membrane	http://amigo.geneontology.org/amigo/term/GO:0097060	396	22	8.47651	2.59541	4.56667e-05	0.000851751	24215;24415;24907;25387;25529;25613;29149;29546;29598;29647;29715;56003;56029;59267;59322;64053;83764;89816;114114;140694;316539;361833	geneontology_Cellular_Component_noRedundant	Dlg2;Ptprs;Strn;Dnm1l;Grm2;Flot2;Arrb1;Atp2b1;Sept3;Picalm;Epha4;Cask;Syt7;Homer1;Ank3;Slc8a1;Cnksr2;Dnm1;Atp2b2;Dmd;Ptprz1;Srcin1
GO:0031329	regulation of cellular catabolic process	http://amigo.geneontology.org/amigo/term/GO:0031329	454	24	9.71802	2.46964	4.56904e-05	0.000851751	24479;24668;25479;29614;29677;54319;56718;60666;64189;114114;116643;117262;117263;170851;289350;289990;291624;297593;299858;301252;313591;316539;317381;364981	geneontology_Biological_Process_noRedundant	Lrp1;Hsp90ab1;Ccdc22;Vcp;Dnm1l;Mtor;Psmc3;Map2k1;Usp5;Ppp1ca;Scoc;Thrap3;Epha4;Vps35;Pafah1b2;Psmc6;Psmc4;Lars;Psmc1;Rab3gap2;Psme2;Ezr;Idh1;Gpd1
GO:0044325	ion channel binding	http://amigo.geneontology.org/amigo/term/GO:0044325	98	10	2.09772	4.76707	4.65632e-05	0.000855257	25150;25387;25577;29753;63836;171444;293860;301252;361833;363159	geneontology_Molecular_Function_noRedundant	Pacs1;Hsp90ab1;Arrb1;Gpd1l;Fyn;Ank3;Ywhaq;Ywhae;Flna;Actn4
GO:0005875	microtubule associated complex	http://amigo.geneontology.org/amigo/term/GO:0005875	99	10	2.11913	4.71892	5.08278e-05	0.000920057	25152;29167;29489;29753;81655;117550;252902;290640;296284;363288	geneontology_Cellular_Component_noRedundant	Dync1li1;Kif1a;Kif5b;Dync1li2;Dync1h1;Kif3b;Dctn1;Map1s;Ywhae;Map1a
GO:0097718	disordered domain specific binding	http://amigo.geneontology.org/amigo/term/GO:0097718	20	5	0.428107	11.6793	5.18755e-05	0.000925607	24392;25150;54319;116563;301252	geneontology_Molecular_Function_noRedundant	Hsp90ab1;Fyn;Gja1;Ap2m1;Ezr
GO:0030029	actin filament-based process	http://amigo.geneontology.org/amigo/term/GO:0030029	490	25	10.4886	2.38354	5.65054e-05	0.000994018	24525;24852;25230;25387;29275;29340;54319;56718;63836;79433;81634;81732;81824;113960;114901;289820;293860;300768;303222;310635;314212;360950;363159;501083;684352	geneontology_Biological_Process_noRedundant	Pdcd6ip;Daam1;Cdc42bpb;Mtor;Actr2;Arhgef2;Arpc1a;Arrb1;Myh10;Gpd1l;Twf2;Prkce;Wdr1;Add3;Actc1;Actr3;Sorbs2;Kras;Tpm4;Actn1;Ezr;Coro2b;Flna;Actn4;Arhgap44
rno00071	Fatty acid degradation	http://www.kegg.jp/kegg-bin/show_pathway?rno00071+140547+170465+171155+25014+291450+29740+308100	47	7	1.00605	6.9579	5.82081e-05	0.000995917	140547;170465;171155;25014;291450;29740;308100	pathway_KEGG	Echs1;Acaa2;Acat1;Eci1;Aldh7a1;Hadhb;Acat2
rno00970	Aminoacyl-tRNA biosynthesis	http://www.kegg.jp/kegg-bin/show_pathway?rno00970+266975+291624+292023+301544+313047+314442+364070	47	7	1.00605	6.9579	5.82081e-05	0.000995917	266975;291624;292023;301544;313047;314442;364070	pathway_KEGG	Iars2;Farsb;Wars;Lars;Sars;Aars;Yars
GO:0032947	protein-containing complex scaffold activity	http://amigo.geneontology.org/amigo/term/GO:0032947	65	8	1.39135	5.74982	7.06648e-05	0.00119271	29546;56003;64551;83788;117515;287606;294708;305227	geneontology_Molecular_Function_noRedundant	Sept2;Sept3;Sept9;Homer1;Sept7;Sgtb;Sept11;Sept4
GO:0007163	establishment or maintenance of cell polarity	http://amigo.geneontology.org/amigo/term/GO:0007163	146	12	3.12518	3.83978	7.17741e-05	0.00119528	29167;54319;60328;64053;83764;83809;171337;289820;301252;310635;360950;501083	geneontology_Biological_Process_noRedundant	Dlg2;Hsp90ab1;Flot2;Pdcd6ip;Actr2;Arhgef2;Wdr1;Dctn1;Rap1b;Ezr;Nsfl1c;Mark2
GO:0097386	glial cell projection	http://amigo.geneontology.org/amigo/term/GO:0097386	23	5	0.492323	10.1559	0.000106799	0.00175516	24416;24907;25150;54319;310392	geneontology_Cellular_Component_noRedundant	Fyn;Grm3;Ezr;Dmd;Slc7a11
GO:0030165	PDZ domain binding	http://amigo.geneontology.org/amigo/term/GO:0030165	88	9	1.88367	4.77791	0.000109437	0.00177516	24215;24392;24907;29382;29598;29647;64053;303306;310533	geneontology_Molecular_Function_noRedundant	Dlg2;Atp2b1;Cask;Gja1;Ctbp1;Rapgef2;Srr;Atp2b2;Dmd
GO:0009896	positive regulation of catabolic process	http://amigo.geneontology.org/amigo/term/GO:0009896	280	17	5.99349	2.83641	0.000116305	0.00185709	24392;25479;25489;29677;54319;60666;64189;116643;117262;117263;170851;289350;289990;297593;299858;317381;364981	geneontology_Biological_Process_noRedundant	Lrp1;Ccdc22;Vcp;Psmc3;Nedd4;Map2k1;Usp5;Scoc;Vps35;Pafah1b2;Psmc6;Psmc4;Psmc1;Gja1;Rab3gap2;Ezr;Gpd1
GO:0051020	GTPase binding	http://amigo.geneontology.org/amigo/term/GO:0051020	364	20	7.79154	2.56689	0.000117462	0.00185709	24400;24917;58983;81667;113960;114114;117028;170851;289350;293860;296284;303222;308939;310533;310635;311193;314212;315676;362273;500287	geneontology_Molecular_Function_noRedundant	Arhgap1;Dnm1l;Daam1;Cdc42bpb;Arhgef2;Map2k1;Gnb1;Dmxl2;Kif3b;Cse1l;Bin1;Rab3gap2;Rapgef2;Srgap3;Rabggta;Gnb2;Kpnb1;Ipo7;Flna;Arhgap44
GO:1990778	protein localization to cell periphery	http://amigo.geneontology.org/amigo/term/GO:1990778	228	15	4.88042	3.07351	0.000121152	0.00189149	25479;29647;54190;54319;81732;83764;117550;170851;171444;293860;299858;303222;316415;361833;362587	geneontology_Biological_Process_noRedundant	Lrp1;Pacs1;Flot2;Kif5b;Map2k1;Fam126b;Macf1;Vps35;Cask;Actr3;Ank3;Ezr;Rabep1;Flna;Arhgap44
GO:0016482	cytosolic transport	http://amigo.geneontology.org/amigo/term/GO:0016482	111	10	2.37599	4.20877	0.000134141	0.00206841	25479;54319;59267;117550;170851;289820;291464;299799;309678;363288	geneontology_Biological_Process_noRedundant	Actr2;Kif1a;Kif5b;Trappc10;Map2k1;Vps35;Syt7;Rab21;Snx2;Ezr
GO:0090087	regulation of peptide transport	http://amigo.geneontology.org/amigo/term/GO:0090087	488	24	10.4458	2.29757	0.000139672	0.00212744	24367;24392;24399;25150;25387;25479;29167;29647;29753;54319;56029;59267;81732;84595;89816;114114;117287;117550;293860;299858;301252;310392;361596;361833	geneontology_Biological_Process_noRedundant	Glud1;Lrp1;Hsp90ab1;Dnm1l;Kif5b;Arrb1;Park7;Fyn;Picalm;Vps35;Dctn1;Cask;Syt7;Gja1;Actr3;Ank3;Idh2;Ezr;Ywhae;Fgg;Flna;Nucb1;Slc7a11;Srcin1
GO:0035254	glutamate receptor binding	http://amigo.geneontology.org/amigo/term/GO:0035254	54	7	1.15589	6.05595	0.000144205	0.00214419	24215;25150;29546;64053;83764;84353;317385	geneontology_Molecular_Function_noRedundant	Dlg2;Flot2;Fyn;Homer1;Ctnnb1;Atp2b2;Fus
rno01212	Fatty acid metabolism	http://www.kegg.jp/kegg-bin/show_pathway?rno01212+140547+170465+171155+25014+29411+308100+50671	54	7	1.15589	6.05595	0.000144205	0.00214419	140547;170465;171155;25014;29411;308100;50671	pathway_KEGG	Echs1;Acaa2;Acat1;Fasn;Ppt1;Hadhb;Acat2
GO:0051129	negative regulation of cellular component organization	http://amigo.geneontology.org/amigo/term/GO:0051129	491	24	10.51	2.28354	0.000153202	0.00225117	25150;25152;25230;25415;25479;25528;25529;25613;29384;63836;81732;114114;114514;170465;171116;252902;293705;299858;310533;310635;316539;497198;684352;100361417	geneontology_Biological_Process_noRedundant	Opa1;Lrp1;Ptprs;Dync1li1;Dnm1l;Arhgef2;Sirpa;Acaa2;Twf2;Fyn;Epha4;Vps35;Add3;Clasp2;H2afy;Actr3;Rapgef2;Impact;Crmp1;Map1a;Tbcd;Actn4;Ptprz1;Otub1
GO:0099072	regulation of postsynaptic membrane neurotransmitter receptor levels	http://amigo.geneontology.org/amigo/term/GO:0099072	73	8	1.56259	5.11971	0.000162283	0.00235688	25479;25489;29753;83764;116563;140694;170851;303222	geneontology_Biological_Process_noRedundant	Flot2;Nedd4;Map2k1;Vps35;Ap2m1;Ywhae;Dnm1;Arhgap44
GO:0051258	protein polymerization	http://amigo.geneontology.org/amigo/term/GO:0051258	184	13	3.93858	3.30068	0.000169332	0.00243098	24367;25230;29167;29340;56718;81732;81824;114114;114514;171116;289820;684352;100361417	geneontology_Biological_Process_noRedundant	Opa1;Dnm1l;Mtor;Actr2;Arpc1a;Twf2;Prkce;Add3;Dctn1;Clasp2;Actr3;Fgg;Tbcd
GO:0019901	protein kinase binding	http://amigo.geneontology.org/amigo/term/GO:0019901	464	23	9.93208	2.31573	0.000171428	0.00243311	24392;24423;24679;25230;25387;25498;25528;29340;29384;54319;56029;56718;116670;117550;140694;170851;301252;310533;311130;314442;316539;361613;684352	geneontology_Molecular_Function_noRedundant	Hsp90ab1;Mtor;Kif5b;Sirpa;Npm1;Arrb1;Map2k1;Twf2;Prkra;Prkce;Epha4;Wars;Add3;H2afy;Gja1;Rapgef2;Prkar2b;Ppme1;Ezr;Gstm1;Dnm1;Ppp1r12a;Srcin1
GO:0099177	regulation of trans-synaptic signaling	http://amigo.geneontology.org/amigo/term/GO:0099177	375	20	8.027	2.49159	0.000174972	0.00245551	24415;24416;24525;24679;25150;25489;29340;29411;29546;56718;59267;114114;117550;140694;171337;298771;310392;310533;316539;687090	geneontology_Biological_Process_noRedundant	Dnm1l;Grm2;Mtor;Kif5b;Nedd4;Fyn;Prepl;Prkce;Epha4;Rap1b;Grm3;Syt7;Homer1;Kras;Rapgef2;Ppt1;Prkar2b;Dnm1;Tprg1l;Slc7a11
GO:0019898	extrinsic component of membrane	http://amigo.geneontology.org/amigo/term/GO:0019898	238	15	5.09447	2.94437	0.000194262	0.00269593	24400;24525;25150;25740;29254;54319;59322;60450;83579;84353;84595;89816;117028;171116;315222	geneontology_Cellular_Component_noRedundant	Opa1;Matk;Mgll;Gnb1;Gnb5;Fyn;Picalm;Bin1;Kras;Gnaz;Cnksr2;Ctnnb1;Ezr;Nucb1;Arsa
GO:0051259	protein complex oligomerization	http://amigo.geneontology.org/amigo/term/GO:0051259	439	22	9.39694	2.34119	0.000203374	0.00279136	24248;24392;24400;25014;25479;25498;25630;26956;64313;65179;81655;84353;114114;116643;170821;170851;171116;252902;291464;301544;303306;305227	geneontology_Biological_Process_noRedundant	Oat;Opa1;Dync1li1;Vcp;Dnm1l;Npm1;Map2k1;Farsb;Gnb1;Acat1;Dync1li2;Vps35;Ppp5c;Cat;Gja1;Pkm;Sept11;Ctnnb1;Snx2;Srr;Ak3;Atxn10
GO:0005819	spindle	http://amigo.geneontology.org/amigo/term/GO:0005819	214	14	4.58074	3.05627	0.00021519	0.00291062	25415;29167;64551;83809;84353;114514;116646;117515;246216;252902;290640;295625;296284;310635	geneontology_Cellular_Component_noRedundant	Sept2;Dync1li1;Arhgef2;Kif3b;Dctn1;Map1s;Clasp2;Tpt1;Sept7;Pkp4;Ctnnb1;Crmp1;Nsfl1c;Prpf19
rno04141	Protein processing in endoplasmic reticulum	http://www.kegg.jp/kegg-bin/show_pathway?rno04141+100362805+116598+116643+24887+286906+288444+29154+293721+301252+362862+363332+83809	164	12	3.51047	3.41834	0.000216723	0.00291062	100362805;116598;116643;24887;286906;288444;29154;293721;301252;362862;363332;83809	pathway_KEGG	Hsp90ab1;Vcp;Ganab;Hsp90b1;Hsph1;Ubxn6;Pdia6;Txndc5;Pdia4;Bax;Capn2;Nsfl1c
GO:0030964	NADH dehydrogenase complex	http://amigo.geneontology.org/amigo/term/GO:0030964	41	6	0.877619	6.83668	0.000219645	0.00291848	64539;117287;293991;301123;361385;362440	geneontology_Cellular_Component_noRedundant	Ndufa9;Ndufa11;Ndufb8;Park7;Ndufv3;Ndufb7
rno00190	Oxidative phosphorylation	http://www.kegg.jp/kegg-bin/show_pathway?rno00190+25282+293991+294504+299971+301123+310856+315167+361385+361663+362440+64539	143	11	3.06096	3.59364	0.000256152	0.00335766	25282;293991;294504;299971;301123;310856;315167;361385;361663;362440;64539	pathway_KEGG	Ppa2;Ndufa6;Ndufa9;Ndufa11;Ndufb8;Atp6v1c1;Ndufv3;Ndufb7;Ppa1;Lhpp;Cox6a1
rno05100	Bacterial invasion of epithelial cells	http://www.kegg.jp/kegg-bin/show_pathway?rno05100+117515+140694+305227+56003+682507+81824+83788+84353	78	8	1.66962	4.79152	0.000258075	0.00335766	117515;140694;305227;56003;682507;81824;83788;84353	pathway_KEGG	Sept2;Arpc1a;Sept3;Sept9;Wasl;Sept11;Ctnnb1;Dnm1
GO:0051962	positive regulation of nervous system development	http://amigo.geneontology.org/amigo/term/GO:0051962	447	22	9.56818	2.29929	0.000261676	0.00336941	24907;25150;25613;29647;56718;60328;81732;84353;89816;114114;117028;171116;246216;289820;293860;299799;310533;310635;316539;364382;497198;684352	geneontology_Biological_Process_noRedundant	Opa1;Dnm1l;Mtor;Actr2;Arhgef2;Twf2;Fyn;Picalm;Epha4;Cask;Bin1;Actr3;Rapgef2;Prmt5;Impact;Ctnnb1;Rab21;Mark2;Flna;Dmd;Ptprz1;Prpf19
GO:0010720	positive regulation of cell development	http://amigo.geneontology.org/amigo/term/GO:0010720	448	22	9.58959	2.29415	0.00026991	0.00343998	24907;25150;25613;29647;56718;60328;81732;84353;89816;114114;117028;171116;246216;289820;293860;299799;310533;310635;316539;364382;497198;684352	geneontology_Biological_Process_noRedundant	Opa1;Dnm1l;Mtor;Actr2;Arhgef2;Twf2;Fyn;Picalm;Epha4;Cask;Bin1;Actr3;Rapgef2;Prmt5;Impact;Ctnnb1;Rab21;Mark2;Flna;Dmd;Ptprz1;Prpf19
GO:0006897	endocytosis	http://amigo.geneontology.org/amigo/term/GO:0006897	418	21	8.94743	2.34704	0.000273683	0.00345282	25387;25489;25528;29411;54190;54319;59267;63836;89816;94174;114114;116563;117028;140694;207119;287709;288779;291464;299799;299858;100362805	geneontology_Biological_Process_noRedundant	Lrp1;Rin1;Rab5b;Dnm1l;Sirpa;Arrb1;Nedd4;Rab5c;Picalm;Bin1;Syt7;Ppt1;Ap2m1;Txndc5;Rab21;Snx2;Ezr;Dnm1;Rabep1;Actn4;Tinagl1
rno04962	Vasopressin-regulated water reabsorption	http://www.kegg.jp/kegg-bin/show_pathway?rno04962+252902+287709+288779+29167+29489+81655	43	6	0.920429	6.5187	0.000287302	0.0035884	252902;287709;288779;29167;29489;81655	pathway_KEGG	Rab5b;Dync1li1;Rab5c;Dync1li2;Dync1h1;Dctn1
GO:0010975	regulation of neuron projection development	http://amigo.geneontology.org/amigo/term/GO:0010975	422	21	9.03305	2.3248	0.000310903	0.00384474	24907;25150;25415;25489;25529;25613;29647;56029;56718;60328;81732;89816;114114;171116;289820;299799;299858;303222;310533;316539;684352	geneontology_Biological_Process_noRedundant	Opa1;Lrp1;Ptprs;Dnm1l;Mtor;Actr2;Nedd4;Twf2;Fyn;Picalm;Epha4;Cask;Actr3;Rapgef2;Crmp1;Rab21;Mark2;Dmd;Ptprz1;Srcin1;Arhgap44
GO:0070469	respiratory chain	http://amigo.geneontology.org/amigo/term/GO:0070469	81	8	1.73383	4.61406	0.000334943	0.0040684	25282;64539;117287;293991;301123;315167;361385;362440	geneontology_Cellular_Component_noRedundant	Ndufa6;Ndufa9;Ndufa11;Ndufb8;Park7;Ndufv3;Ndufb7;Cox6a1
GO:0098552	side of membrane	http://amigo.geneontology.org/amigo/term/GO:0098552	335	18	7.17079	2.51018	0.000335504	0.0040684	24367;24400;24525;24907;25150;25740;29154;29598;54319;60450;79559;83579;84595;117099;295625;299799;313173;315222	geneontology_Cellular_Component_noRedundant	Matk;Cntfr;Alcam;Atp2b1;Gnb1;Gnb5;Fyn;Bdh1;Kras;Gnaz;Pkp4;Capn2;Rab21;Ezr;Fgg;Nucb1;Dmd;Arsa
GO:0043531	ADP binding	http://amigo.geneontology.org/amigo/term/GO:0043531	29	5	0.620755	8.05471	0.000339238	0.00407412	25035;25630;29562;65179;116643	geneontology_Molecular_Function_noRedundant	Vcp;Cyb5r3;Prps1;Ppp5c;Pkm
GO:0043209	myelin sheath	http://amigo.geneontology.org/amigo/term/GO:0043209	125	10	2.67567	3.73739	0.000354827	0.00419983	24400;24534;54319;81667;116643;140694;293481;298942;299809;360950	geneontology_Cellular_Component_noRedundant	Vcp;Ldhb;Gnb1;Dld;Cct2;Wdr1;Tufm;Ezr;Gnb2;Dnm1
GO:0046677	response to antibiotic	http://amigo.geneontology.org/amigo/term/GO:0046677	396	20	8.47651	2.35946	0.00035643	0.00419983	24248;24423;25150;25528;25604;29154;29275;29715;65179;81729;81732;116685;117099;117287;171116;245981;289820;293481;315222;497198	geneontology_Biological_Process_noRedundant	Opa1;Actr2;Sirpa;Park7;Fyn;Ppp5c;Rpl15;Actc1;Cat;Actr3;Bdh1;Impact;Slc8a1;Lmnb1;Pcmt1;Rpl10a;Tufm;Capn2;Gstm1;Arsa
GO:0008047	enzyme activator activity	http://amigo.geneontology.org/amigo/term/GO:0008047	309	17	6.61425	2.57021	0.000372562	0.00434888	25387;29614;54190;83506;83579;116643;117287;207119;289350;291624;299147;303222;310533;311130;311193;500287;100361417	geneontology_Molecular_Function_noRedundant	Arhgap1;Rin1;Vcp;Arrb1;Park7;Gnb5;Prkra;Camkk2;Lars;Rab3gap2;Rapgef2;Srgap3;Ppp2r5e;Psme2;Rabep1;Tbcd;Arhgap44
GO:0030276	clathrin binding	http://amigo.geneontology.org/amigo/term/GO:0030276	46	6	0.984645	6.09356	0.000418294	0.00481915	25387;29663;59267;89816;114114;299858	geneontology_Molecular_Function_noRedundant	Lrp1;Dnm1l;Arrb1;Picalm;Ap1b1;Syt7
GO:0060589	nucleoside-triphosphatase regulator activity	http://amigo.geneontology.org/amigo/term/GO:0060589	202	13	4.32388	3.00656	0.000420566	0.00481915	25387;25528;54190;83579;207119;288444;289350;291624;303222;310533;311193;500287;100361417	geneontology_Molecular_Function_noRedundant	Arhgap1;Rin1;Sirpa;Arrb1;Gnb5;Hsph1;Lars;Rab3gap2;Rapgef2;Srgap3;Rabep1;Tbcd;Arhgap44
GO:0099003	vesicle-mediated transport in synapse	http://amigo.geneontology.org/amigo/term/GO:0099003	177	12	3.78874	3.16728	0.000436266	0.00495361	25479;25489;29340;59267;89816;114114;116563;117028;140694;171337;298771;308777	geneontology_Biological_Process_noRedundant	Dnm1l;Nedd4;Prepl;Picalm;Prkce;Vps35;Rap1b;Bin1;Syt7;Ap2m1;Ap3b2;Dnm1
GO:0043087	regulation of GTPase activity	http://amigo.geneontology.org/amigo/term/GO:0043087	286	16	6.12193	2.61356	0.000458957	0.0051643	25387;54190;56718;83579;117028;170851;207119;289350;291624;295625;303222;310533;311193;316539;500287;100361417	geneontology_Biological_Process_noRedundant	Arhgap1;Rin1;Mtor;Arrb1;Map2k1;Gnb5;Epha4;Lars;Bin1;Rab3gap2;Rapgef2;Srgap3;Pkp4;Rabep1;Tbcd;Arhgap44
rno00380	Tryptophan metabolism	http://www.kegg.jp/kegg-bin/show_pathway?rno00380+140547+24248+25014+291450+308100+360975	47	6	1.00605	5.96391	0.00047099	0.00525238	140547;24248;25014;291450;308100;360975	pathway_KEGG	Echs1;Acat1;Ogdh;Cat;Aldh7a1;Acat2
GO:0005516	calmodulin binding	http://amigo.geneontology.org/amigo/term/GO:0005516	130	10	2.78269	3.59364	0.000485217	0.00536315	24215;24654;25230;29149;29598;29647;29715;59267;79433;83506	geneontology_Molecular_Function_noRedundant	Strn;Plcb1;Myh10;Atp2b1;Add3;Camkk2;Cask;Syt7;Slc8a1;Atp2b2
rno04723	Retrograde endocannabinoid signaling	http://www.kegg.jp/kegg-bin/show_pathway?rno04723+24400+24654+29254+293991+301123+315167+361385+362440+64539+81667+83579	155	11	3.31783	3.31542	0.000511242	0.00560124	24400;24654;29254;293991;301123;315167;361385;362440;64539;81667;83579	pathway_KEGG	Plcb1;Ndufa6;Ndufa9;Mgll;Ndufa11;Ndufb8;Gnb1;Gnb5;Ndufv3;Ndufb7;Gnb2
GO:0019866	organelle inner membrane	http://amigo.geneontology.org/amigo/term/GO:0019866	318	17	6.8069	2.49747	0.000517093	0.00561608	24907;25282;64539;114766;116685;117099;117287;171116;171139;171155;293991;301123;312444;315167;361385;362440;498909	geneontology_Cellular_Component_noRedundant	Opa1;Ndufa6;Phb2;Ndufa9;Ndufa11;Ndufb8;Park7;Immt;Coq9;Ndufv3;Ndufb7;Bdh1;Lmnb1;Hadhb;Dmd;Timm9;Cox6a1
GO:0000287	magnesium ion binding	http://amigo.geneontology.org/amigo/term/GO:0000287	156	11	3.33923	3.29417	0.000539748	0.0058116	24479;25630;29562;60328;94173;113960;117272;301544;303306;361596;361663	geneontology_Molecular_Function_noRedundant	Prpsap2;Cdc42bpb;Idh3B;Farsb;Prps1;Pkm;Idh2;Srr;Mark2;Idh1;Lhpp
GO:0072350	tricarboxylic acid metabolic process	http://amigo.geneontology.org/amigo/term/GO:0072350	32	5	0.684971	7.29958	0.00054581	0.00582664	24159;24399;24479;94173;361596	geneontology_Biological_Process_noRedundant	Glud1;Idh3B;Acly;Idh2;Idh1
GO:0043292	contractile fiber	http://amigo.geneontology.org/amigo/term/GO:0043292	157	11	3.36064	3.27319	0.00056957	0.00602875	24392;24907;29275;29715;63836;81634;116670;117028;245981;361833;684352	geneontology_Cellular_Component_noRedundant	Twf2;Rpl15;Actc1;Bin1;Gja1;Ank3;Slc8a1;Actn1;Ppp1r12a;Actn4;Dmd
GO:0005911	cell-cell junction	http://amigo.geneontology.org/amigo/term/GO:0005911	321	17	6.87111	2.47413	0.000574953	0.00603459	24392;24668;29715;63836;81732;83764;84353;113960;171337;293860;295625;310533;310635;360950;361833;501083;100361417	geneontology_Cellular_Component_noRedundant	Flot2;Pdcd6ip;Cdc42bpb;Arhgef2;Ppp1ca;Wdr1;Rap1b;Gja1;Actr3;Ank3;Rapgef2;Slc8a1;Pkp4;Ctnnb1;Flna;Tbcd;Actn4
GO:0072524	pyridine-containing compound metabolic process	http://amigo.geneontology.org/amigo/term/GO:0072524	111	9	2.37599	3.78789	0.00063034	0.00656079	24479;24534;25062;25630;60666;94173;116643;361596;363159	geneontology_Biological_Process_noRedundant	Vcp;Ldhb;Idh3B;Gpd1l;Gpd2;Pkm;Idh2;Idh1;Gpd1
GO:0051345	positive regulation of hydrolase activity	http://amigo.geneontology.org/amigo/term/GO:0051345	446	21	9.54678	2.19969	0.000641909	0.00662599	25150;25387;29614;54190;83579;89816;116643;116670;117028;170851;207119;289350;291624;295625;301252;303222;310533;311193;316539;500287;100361417	geneontology_Biological_Process_noRedundant	Arhgap1;Rin1;Hsp90ab1;Vcp;Arrb1;Map2k1;Gnb5;Fyn;Picalm;Epha4;Lars;Bin1;Rab3gap2;Rapgef2;Srgap3;Pkp4;Psme2;Rabep1;Ppp1r12a;Tbcd;Arhgap44
GO:0030705	cytoskeleton-dependent intracellular transport	http://amigo.geneontology.org/amigo/term/GO:0030705	113	9	2.4188	3.72085	0.000717543	0.00734599	29167;29489;63836;83764;117550;170851;299799;308777;363288	geneontology_Biological_Process_noRedundant	Flot2;Kif1a;Kif5b;Map2k1;Dync1h1;Dctn1;Ap3b2;Rab21;Actn4
GO:0033267	axon part	http://amigo.geneontology.org/amigo/term/GO:0033267	389	19	8.32668	2.28182	0.000746514	0.00758045	25613;29753;59267;64053;83825;116563;117028;117550;140694;171114;192361;299799;301252;308777;316539;361833;363288;684352;687090	geneontology_Cellular_Component_noRedundant	Dlg2;Hsp90ab1;Dclk1;Kif1a;Kif5b;Ndrg2;Twf2;Ppp1r2;Epha4;Bin1;Syt7;Ank3;Ap2m1;Ap3b2;Rab21;Ywhae;Dnm1;Tprg1l;Ptprz1
GO:0014854	response to inactivity	http://amigo.geneontology.org/amigo/term/GO:0014854	20	4	0.428107	9.34347	0.000761427	0.00766953	24248;24907;25489;25630	geneontology_Biological_Process_noRedundant	Nedd4;Cat;Pkm;Dmd
GO:0030133	transport vesicle	http://amigo.geneontology.org/amigo/term/GO:0030133	300	16	6.4216	2.49159	0.000769106	0.00768491	24907;25529;29411;59267;64516;89816;114114;117028;140694;287606;287709;288779;315676;360915;363288;687090	geneontology_Cellular_Component_noRedundant	Ptprs;Rab5b;Dnm1l;Kif1a;Rab5c;Dmxl2;Picalm;Bin1;Syt7;Ppt1;Cops4;Dnm1;Tprg1l;Sept4;Dmd;Vps45
GO:0048770	pigment granule	http://amigo.geneontology.org/amigo/term/GO:0048770	71	7	1.51978	4.60593	0.00079425	0.00787317	29753;50671;116598;286906;301252;362862;501083	geneontology_Cellular_Component_noRedundant	Hsp90ab1;Pdcd6ip;Hsp90b1;Pdia6;Fasn;Pdia4;Ywhae
GO:0003774	motor activity	http://amigo.geneontology.org/amigo/term/GO:0003774	94	8	2.0121	3.97594	0.00091219	0.00897106	29167;29489;79433;81655;117550;252902;296284;363288	geneontology_Molecular_Function_noRedundant	Dync1li1;Kif1a;Kif5b;Myh10;Dync1li2;Dync1h1;Kif3b;Dctn1
GO:0090066	regulation of anatomical structure size	http://amigo.geneontology.org/amigo/term/GO:0090066	397	19	8.49792	2.23584	0.000950584	0.00927562	24186;24367;24392;25230;25498;25529;29254;29340;54319;56718;81732;81824;170851;289820;291624;299799;301252;360950;684352	geneontology_Biological_Process_noRedundant	Ptprs;Hsp90ab1;Mtor;Actr2;Mgll;Arpc1a;Npm1;Map2k1;Twf2;Prkce;Wdr1;Add3;Lars;Gja1;Actr3;Alb;Rab21;Ezr;Fgg
GO:0003158	endothelium development	http://amigo.geneontology.org/amigo/term/GO:0003158	74	7	1.58399	4.41921	0.00101773	0.00985379	24392;24907;50671;54319;84353;171337;310533	geneontology_Biological_Process_noRedundant	Rap1b;Gja1;Rapgef2;Fasn;Ctnnb1;Ezr;Dmd
GO:0098798	mitochondrial protein complex	http://amigo.geneontology.org/amigo/term/GO:0098798	223	13	4.77339	2.72343	0.00105976	0.0101819	25282;29711;64539;94173;117287;171139;171155;288150;293991;300111;301123;361385;362440	geneontology_Cellular_Component_noRedundant	Ndufa9;Ndufa11;Ndufb8;Idh3B;Park7;Mtx2;Ndufv3;Samm50;Ndufb7;Hadhb;Bckdhb;Timm9;Cox6a1
GO:0019867	outer membrane	http://amigo.geneontology.org/amigo/term/GO:0019867	145	10	3.10377	3.22188	0.00113365	0.0108086	24392;24907;25035;56718;114114;171116;171155;288150;300111;316539	geneontology_Cellular_Component_noRedundant	Opa1;Dnm1l;Cyb5r3;Mtor;Epha4;Mtx2;Samm50;Gja1;Hadhb;Dmd
GO:0042063	gliogenesis	http://amigo.geneontology.org/amigo/term/GO:0042063	225	13	4.8162	2.69922	0.00114953	0.010877	24525;24907;25613;56718;81732;84353;117028;246216;299858;316539;360950;361596;364382	geneontology_Biological_Process_noRedundant	Lrp1;Mtor;Epha4;Wdr1;Bin1;Actr3;Kras;Prmt5;Ctnnb1;Idh2;Dmd;Ptprz1;Prpf19
GO:0099503	secretory vesicle	http://amigo.geneontology.org/amigo/term/GO:0099503	436	20	9.33273	2.143	0.00118033	0.0110844	24367;24907;25529;29411;59267;64516;83764;89816;114114;117028;140694;287606;287709;288779;298942;315222;315676;360915;363288;687090	geneontology_Cellular_Component_noRedundant	Ptprs;Rab5b;Dnm1l;Flot2;Kif1a;Dld;Rab5c;Dmxl2;Picalm;Bin1;Syt7;Ppt1;Cops4;Dnm1;Fgg;Tprg1l;Sept4;Dmd;Arsa;Vps45
GO:0072594	establishment of protein localization to organelle	http://amigo.geneontology.org/amigo/term/GO:0072594	258	14	5.52258	2.53505	0.00137295	0.0127971	24917;25489;29384;171139;288620;291624;293860;294708;299809;300111;301252;308939;362273;363707	geneontology_Biological_Process_noRedundant	Hsp90ab1;Cct6a;Nedd4;Cct2;Cse1l;Samm50;Lars;H2afy;Sgtb;Srp68;Kpnb1;Ipo7;Flna;Timm9
GO:0010959	regulation of metal ion transport	http://amigo.geneontology.org/amigo/term/GO:0010959	294	15	6.29317	2.38354	0.00172703	0.0158412	24392;24907;25150;25489;29340;29546;29715;29753;83579;84353;117550;293860;361613;361833;363159	geneontology_Biological_Process_noRedundant	Kif5b;Nedd4;Gpd1l;Gnb5;Fyn;Prkce;Gja1;Homer1;Ank3;Slc8a1;Ctnnb1;Ppme1;Ywhae;Flna;Dmd
GO:0042440	pigment metabolic process	http://amigo.geneontology.org/amigo/term/GO:0042440	41	5	0.877619	5.69723	0.00173582	0.0158412	58917;64300;116599;310392;310533	geneontology_Biological_Process_noRedundant	Blvra;Hpx;Rapgef2;Mthfd1;Slc7a11
GO:0071407	cellular response to organic cyclic compound	http://amigo.geneontology.org/amigo/term/GO:0071407	483	21	10.3388	2.03119	0.00173759	0.0158412	24654;25498;29489;29598;29715;54319;60666;65179;79244;81732;84353;114114;116685;117287;171337;289820;300968;301252;310533;313591;497198	geneontology_Biological_Process_noRedundant	Hsp90ab1;Plcb1;Dnm1l;Hsd17b4;Actr2;Npm1;Uba5;Atp2b1;Park7;Thrap3;Dync1h1;Rap1b;Ppp5c;Actr3;Rapgef2;Impact;Slc8a1;Lmnb1;Ctnnb1;Ezr;Gpd1
GO:0070646	protein modification by small protein removal	http://amigo.geneontology.org/amigo/term/GO:0070646	104	8	2.22615	3.59364	0.00175641	0.0158968	116643;117287;286761;287367;293705;297593;360471;360915	geneontology_Biological_Process_noRedundant	Vcp;Park7;Usp5;Usp7;Vcpip1;Cops4;Cops3;Otub1
GO:0098589	membrane region	http://amigo.geneontology.org/amigo/term/GO:0098589	297	15	6.35738	2.35946	0.00190626	0.0170981	24215;24392;24525;24679;24907;25150;25230;25489;29154;29411;29598;29647;54319;83764;117287	geneontology_Cellular_Component_noRedundant	Flot2;Nedd4;Atp2b1;Park7;Fyn;Add3;Cask;Gja1;Kras;Ppt1;Prkar2b;Capn2;Ezr;Atp2b2;Dmd
GO:0031400	negative regulation of protein modification process	http://amigo.geneontology.org/amigo/term/GO:0031400	390	18	8.34808	2.15618	0.0019191	0.0170981	24679;24907;25150;25387;25498;29384;29753;54319;56029;56718;65179;84353;117287;192361;293705;314442;363159;497198	geneontology_Biological_Process_noRedundant	Mtor;Npm1;Arrb1;Park7;Gpd1l;Fyn;Ppp1r2;Wars;Ppp5c;H2afy;Impact;Prkar2b;Ctnnb1;Ezr;Ywhae;Dmd;Srcin1;Otub1
GO:0051668	localization within membrane	http://amigo.geneontology.org/amigo/term/GO:0051668	130	9	2.78269	3.23428	0.0019302	0.0170981	25479;25489;64053;116563;140694;170851;293860;303222;310392	geneontology_Biological_Process_noRedundant	Dlg2;Nedd4;Map2k1;Vps35;Ap2m1;Dnm1;Flna;Slc7a11;Arhgap44
GO:0006457	protein folding	http://amigo.geneontology.org/amigo/term/GO:0006457	131	9	2.8041	3.20959	0.00203456	0.0178956	116598;286906;288444;288620;294708;299809;301252;362862;100361417	geneontology_Biological_Process_noRedundant	Hsp90ab1;Cct6a;Hsp90b1;Cct2;Hsph1;Pdia6;Sgtb;Pdia4;Tbcd
GO:0043632	modification-dependent macromolecule catabolic process	http://amigo.geneontology.org/amigo/term/GO:0043632	425	19	9.09727	2.08854	0.0020835	0.0181978	25387;25489;29669;64624;83809;85492;116643;287367;287772;287984;289990;294708;297593;301252;317381;360471;361970;362862;100912032	geneontology_Biological_Process_noRedundant	Hsp90ab1;Ccdc22;Vcp;Arrb1;Nedd4;Psma2;Usp5;Usp7;Hsp90b1;Psmd2;Cul5;Psmc6;Psmd12;Trim2;Sgtb;Nsfl1c;Psmb7;Cops3;Rps27a
GO:0090734	site of DNA damage	http://amigo.geneontology.org/amigo/term/GO:0090734	43	5	0.920429	5.43225	0.00215336	0.0186774	81732;81824;116643;246216;289820	geneontology_Cellular_Component_noRedundant	Vcp;Actr2;Arpc1a;Actr3;Prpf19
rno04728	Dopaminergic synapse	http://www.kegg.jp/kegg-bin/show_pathway?rno04728+117550+24400+24654+24668+24672+299147+311024+81667+83579	133	9	2.84691	3.16132	0.00225678	0.0194394	117550;24400;24654;24668;24672;299147;311024;81667;83579	pathway_KEGG	Plcb1;Kif5b;Gnb1;Ppp1ca;Gnb5;Ppp2r5e;Gnb2;Ppp2ca;Kif5c
rno01230	Biosynthesis of amino acids	http://www.kegg.jp/kegg-bin/show_pathway?rno01230+24479+25104+25630+29562+29592+361596+94173	86	7	1.84086	3.80257	0.00244455	0.0208287	24479;25104;25630;29562;29592;361596;94173	pathway_KEGG	Pc;Idh3B;Prps1;Pkm;Bcat1;Idh2;Idh1
GO:0042398	cellular modified amino acid biosynthetic process	http://amigo.geneontology.org/amigo/term/GO:0042398	27	4	0.577944	6.92109	0.00245142	0.0208287	64300;117287;291450;310392	geneontology_Biological_Process_noRedundant	Park7;Aldh7a1;Mthfd1;Slc7a11
GO:0034330	cell junction organization	http://amigo.geneontology.org/amigo/term/GO:0034330	161	10	3.44626	2.9017	0.00247321	0.0208719	24392;63836;84353;171337;295625;310533;360950;362587;501083;100361417	geneontology_Biological_Process_noRedundant	Pdcd6ip;Macf1;Wdr1;Rap1b;Gja1;Rapgef2;Pkp4;Ctnnb1;Tbcd;Actn4
GO:0031647	regulation of protein stability	http://amigo.geneontology.org/amigo/term/GO:0031647	162	10	3.46766	2.88379	0.00258723	0.0216876	24525;25479;25498;83764;117287;288620;293860;299809;316539;360471	geneontology_Biological_Process_noRedundant	Flot2;Npm1;Cct6a;Park7;Usp7;Epha4;Vps35;Cct2;Kras;Flna
GO:1903320	regulation of protein modification by small protein conjugation or removal	http://amigo.geneontology.org/amigo/term/GO:1903320	136	9	2.91113	3.09159	0.00262587	0.0218343	25150;25387;25498;56718;84353;116643;117287;293705;301252	geneontology_Biological_Process_noRedundant	Hsp90ab1;Vcp;Mtor;Npm1;Arrb1;Park7;Fyn;Ctnnb1;Otub1
GO:0006081	cellular aldehyde metabolic process	http://amigo.geneontology.org/amigo/term/GO:0006081	45	5	0.96324	5.19081	0.0026397	0.0218343	24439;24479;117287;294320;361596	geneontology_Biological_Process_noRedundant	Park7;Hagh;Glo1;Idh2;Idh1
GO:0070161	anchoring junction	http://amigo.geneontology.org/amigo/term/GO:0070161	219	12	4.68777	2.55985	0.00273389	0.0224646	24392;24668;29154;54319;81732;83764;84353;114901;170851;295625;363707;100361417	geneontology_Cellular_Component_noRedundant	Flot2;Map2k1;Ppp1ca;Gja1;Actr3;Sorbs2;Pkp4;Srp68;Ctnnb1;Capn2;Ezr;Tbcd
GO:1903047	mitotic cell cycle process	http://amigo.geneontology.org/amigo/term/GO:1903047	436	19	9.33273	2.03585	0.00276853	0.0226006	24654;29167;29384;29489;29614;56003;64551;83788;83809;114514;116643;117515;252902;287606;293860;296284;305227;310635;501083	geneontology_Biological_Process_noRedundant	Sept2;Dync1li1;Plcb1;Vcp;Pdcd6ip;Arhgef2;Sept3;Sept9;Dync1h1;Kif3b;Dctn1;Clasp2;H2afy;Sept7;Sept11;Psme2;Nsfl1c;Sept4;Flna
rno00650	Butanoate metabolism	http://www.kegg.jp/kegg-bin/show_pathway?rno00650+117099+140547+25014+308100	28	4	0.599349	6.6739	0.00281237	0.0228094	117099;140547;25014;308100	pathway_KEGG	Echs1;Acat1;Bdh1;Acat2
rno04810	Regulation of actin cytoskeleton	http://www.kegg.jp/kegg-bin/show_pathway?rno04810+116670+170851+24525+24668+286928+360891+54319+63836+682507+79433+81634+81824	220	12	4.70917	2.54822	0.0028376	0.0228656	116670;170851;24525;24668;286928;360891;54319;63836;682507;79433;81634;81824	pathway_KEGG	Abi2;Arpc1a;Myh10;Map2k1;Ppp1ca;Enah;Kras;Wasl;Actn1;Ezr;Ppp1r12a;Actn4
GO:0061024	membrane organization	http://amigo.geneontology.org/amigo/term/GO:0061024	438	19	9.37554	2.02655	0.00291142	0.02331	25479;29167;29382;29411;59267;64053;83764;83809;114114;117550;140694;170465;171116;171139;286761;300111;303222;310392;361833	geneontology_Biological_Process_noRedundant	Dlg2;Opa1;Dnm1l;Flot2;Kif5b;Acaa2;Vps35;Dctn1;Samm50;Vcpip1;Syt7;Ctbp1;Ank3;Ppt1;Dnm1;Nsfl1c;Timm9;Slc7a11;Arhgap44
GO:0061919	process utilizing autophagic mechanism	http://amigo.geneontology.org/amigo/term/GO:0061919	251	13	5.37274	2.41962	0.00301962	0.0240224	56718;64189;83809;114114;116643;117287;170851;289350;291624;291750;301252;315222;364981	geneontology_Biological_Process_noRedundant	Hsp90ab1;Vcp;Dnm1l;Mtor;Map2k1;Park7;Scoc;Pafah1b2;Lars;Rab3gap2;Nsfl1c;Arsa;Trappc8
GO:0016887	ATPase activity	http://amigo.geneontology.org/amigo/term/GO:0016887	312	15	6.67846	2.24603	0.00305145	0.0241219	24215;29275;29489;29598;29677;116643;117262;117263;117550;289990;296284;299971;303831;362587;363288	geneontology_Molecular_Function_noRedundant	Vcp;Psmc3;Kif1a;Kif5b;Atp6v1c1;Atp2b1;Macf1;Dync1h1;Kif3b;Psmc6;Actc1;Psmc4;Psmc1;Eif4a2;Atp2b2
GO:0030496	midbody	http://amigo.geneontology.org/amigo/term/GO:0030496	114	8	2.44021	3.27841	0.00312435	0.0245429	25415;64551;116546;117515;171455;295625;296284;501083	geneontology_Cellular_Component_noRedundant	Sept2;Pdcd6ip;Kif3b;Ralb;Sept7;Pkp4;Crmp1;Exoc2
GO:0042180	cellular ketone metabolic process	http://amigo.geneontology.org/amigo/term/GO:0042180	140	9	2.99675	3.00326	0.00319069	0.0247526	24439;29224;56718;60666;117287;294320;310392;362440;498909	geneontology_Biological_Process_noRedundant	Mtor;Ndufa9;Park7;Coq9;Hagh;Glo1;Gpd1;Cbr1;Slc7a11
GO:0046434	organophosphate catabolic process	http://amigo.geneontology.org/amigo/term/GO:0046434	140	9	2.99675	3.00326	0.00319069	0.0247526	24479;24654;25014;25062;25630;60666;116643;363159;499913	geneontology_Biological_Process_noRedundant	Plcb1;Vcp;Gpd1l;Acat1;Gpd2;Abhd12;Pkm;Idh1;Gpd1
GO:0010563	negative regulation of phosphorus metabolic process	http://amigo.geneontology.org/amigo/term/GO:0010563	377	17	8.06981	2.10662	0.0032227	0.0248466	24679;24907;25387;25498;29384;29753;54319;56029;56718;64053;65179;117287;192361;314442;363159;497198;100910536	geneontology_Biological_Process_noRedundant	Dlg2;Mtor;Npm1;Arrb1;Park7;Gpd1l;Ppp1r2;Wars;Ppp5c;H2afy;Elfn2;Impact;Prkar2b;Ezr;Ywhae;Dmd;Srcin1
rno04371	Apelin signaling pathway	http://www.kegg.jp/kegg-bin/show_pathway?rno04371+170851+24400+24525+24654+29340+29715+56718+81667+83579	141	9	3.01815	2.98196	0.00334584	0.0256378	170851;24400;24525;24654;29340;29715;56718;81667;83579	pathway_KEGG	Plcb1;Mtor;Map2k1;Gnb1;Gnb5;Prkce;Kras;Slc8a1;Gnb2
GO:0042579	microbody	http://amigo.geneontology.org/amigo/term/GO:0042579	116	8	2.48302	3.22188	0.0034771	0.0264811	24248;24479;25014;59267;79244;114114;308100;361596	geneontology_Cellular_Component_noRedundant	Dnm1l;Hsd17b4;Acat1;Cat;Syt7;Idh2;Idh1;Acat2
GO:0045862	positive regulation of proteolysis	http://amigo.geneontology.org/amigo/term/GO:0045862	226	12	4.83761	2.48057	0.00352906	0.0267139	25150;25387;29614;29677;89816;116643;117262;117263;289990;297593;316539;317381	geneontology_Biological_Process_noRedundant	Ccdc22;Vcp;Psmc3;Arrb1;Usp5;Fyn;Picalm;Epha4;Psmc6;Psmc4;Psmc1;Psme2
GO:0031253	cell projection membrane	http://amigo.geneontology.org/amigo/term/GO:0031253	227	12	4.85901	2.46964	0.00365651	0.027512	24400;25604;25613;29598;29647;54319;114514;117515;301252;310392;310635;362587	geneontology_Cellular_Component_noRedundant	Sept2;Hsp90ab1;Arhgef2;Atp2b1;Gnb1;Macf1;Clasp2;Cask;Pcmt1;Ezr;Ptprz1;Slc7a11
GO:0051051	negative regulation of transport	http://amigo.geneontology.org/amigo/term/GO:0051051	350	16	7.49187	2.13565	0.00369039	0.0276006	25479;25489;25528;25577;29340;29753;54319;56029;56718;83579;117287;170465;171337;311193;361596;361833	geneontology_Biological_Process_noRedundant	Arhgap1;Mtor;Sirpa;Acaa2;Nedd4;Park7;Gnb5;Prkce;Vps35;Rap1b;Ank3;Ywhaq;Idh2;Ezr;Ywhae;Srcin1
GO:0016234	inclusion body	http://amigo.geneontology.org/amigo/term/GO:0016234	49	5	1.04886	4.76707	0.00384358	0.0284325	89816;117262;289990;301252;362029	geneontology_Cellular_Component_noRedundant	Hsp90ab1;Agl;Picalm;Psmc6;Psmc4
rno04261	Adrenergic signaling in cardiomyocytes	http://www.kegg.jp/kegg-bin/show_pathway?rno04261+24215+24654+24668+24672+24852+29275+29598+29715+299147	144	9	3.08237	2.91983	0.00384716	0.0284325	24215;24654;24668;24672;24852;29275;29598;29715;299147	pathway_KEGG	Plcb1;Atp2b1;Ppp1ca;Actc1;Slc8a1;Ppp2r5e;Tpm4;Ppp2ca;Atp2b2
GO:0061008	hepaticobiliary system development	http://amigo.geneontology.org/amigo/term/GO:0061008	172	10	3.68172	2.71612	0.00397538	0.0290458	24525;25014;25498;25630;26956;84353;117099;192172;308100;364382	geneontology_Biological_Process_noRedundant	Npm1;Acat1;Pkm;Bdh1;Kras;Prmt5;Ctnnb1;Ak3;Mpst;Acat2
GO:0031346	positive regulation of cell projection organization	http://amigo.geneontology.org/amigo/term/GO:0031346	321	15	6.87111	2.18305	0.00397664	0.0290458	24907;25150;25613;29647;56718;60328;81732;89816;114114;171116;289820;299799;310533;316539;684352	geneontology_Biological_Process_noRedundant	Opa1;Dnm1l;Mtor;Actr2;Twf2;Fyn;Picalm;Epha4;Cask;Actr3;Rapgef2;Rab21;Mark2;Dmd;Ptprz1
rno05203	Viral carcinogenesis	http://www.kegg.jp/kegg-bin/show_pathway?rno05203+117263+24525+24887+25577+25630+29753+360471+364073+63836+64470+81634+84581	230	12	4.92323	2.43743	0.00406129	0.0293931	117263;24525;24887;25577;25630;29753;360471;364073;63836;64470;81634;84581	pathway_KEGG	Hdac6;Usp7;Psmc1;Pkm;Kras;Ywhaq;Bax;Ddx3y;Actn1;Ywhae;Actn4;Ddb1
GO:0031970	organelle envelope lumen	http://amigo.geneontology.org/amigo/term/GO:0031970	71	6	1.51978	3.94794	0.00409479	0.0293931	24248;26956;29154;171116;171139;361385	geneontology_Cellular_Component_noRedundant	Opa1;Ndufb7;Cat;Capn2;Ak3;Timm9
GO:0048475	coated membrane	http://amigo.geneontology.org/amigo/term/GO:0048475	71	6	1.51978	3.94794	0.00409479	0.0293931	29663;114114;116563;140694;304978;308777	geneontology_Cellular_Component_noRedundant	Dnm1l;Ap1b1;Ap2m1;Ap3b2;Copa;Dnm1
rno05016	Huntington disease	http://www.kegg.jp/kegg-bin/show_pathway?rno05016+116563+24654+24887+25282+29167+293991+301123+315167+361385+362440+64539	202	11	4.32388	2.54401	0.00424201	0.0302759	116563;24654;24887;25282;29167;293991;301123;315167;361385;362440;64539	pathway_KEGG	Plcb1;Ndufa6;Ndufa9;Ndufa11;Ndufb8;Ndufv3;Dctn1;Ndufb7;Ap2m1;Bax;Cox6a1
GO:0071417	cellular response to organonitrogen compound	http://amigo.geneontology.org/amigo/term/GO:0071417	488	20	10.4458	1.91464	0.00432648	0.0307033	24654;25150;25630;29154;29489;29715;54319;56718;60666;81732;84353;171116;171337;289820;291624;299858;310533;310635;316539;497198	geneontology_Biological_Process_noRedundant	Opa1;Lrp1;Plcb1;Mtor;Actr2;Arhgef2;Fyn;Dync1h1;Epha4;Rap1b;Lars;Actr3;Pkm;Rapgef2;Impact;Slc8a1;Ctnnb1;Capn2;Ezr;Gpd1
rno00010	Glycolysis / Gluconeogenesis	http://www.kegg.jp/kegg-bin/show_pathway?rno00010+24534+24645+25630+291450+298942+361042	72	6	1.54118	3.89311	0.00438851	0.0308873	24534;24645;25630;291450;298942;361042	pathway_KEGG	Ldhb;Dld;Pck2;Pkm;Aldh7a1;Pgm1
rno04510	Focal adhesion	http://www.kegg.jp/kegg-bin/show_pathway?rno04510+116670+170851+171337+24668+25150+29154+293860+315776+63836+81634+84353	203	11	4.34528	2.53148	0.00440188	0.0308873	116670;170851;171337;24668;25150;29154;293860;315776;63836;81634;84353	pathway_KEGG	Map2k1;Ppp1ca;Fyn;Tln2;Rap1b;Ctnnb1;Capn2;Actn1;Ppp1r12a;Flna;Actn4
rno05034	Alcoholism	http://www.kegg.jp/kegg-bin/show_pathway?rno05034+170851+24400+24525+24668+29384+365877+81667+83506+83579+84581	175	10	3.74593	2.66956	0.00449019	0.0312343	170851;24400;24525;24668;29384;365877;81667;83506;83579;84581	pathway_KEGG	Hdac6;Map2k1;Gnb1;Ppp1ca;Gnb5;Camkk2;H2afy;Kras;Hist2h2aa3;Gnb2
GO:0044445	cytosolic part	http://amigo.geneontology.org/amigo/term/GO:0044445	233	12	4.98744	2.40604	0.00450134	0.0312343	29340;56718;81729;81774;117262;245981;287984;288620;289990;294708;299809;100912032	geneontology_Cellular_Component_noRedundant	Mtor;Cct6a;Prkce;Cct2;Psmd2;Rpl15;Psmc6;Psmc4;Rps11;Sgtb;Rpl10a;Rps27a
GO:0007212	dopamine receptor signaling pathway	http://amigo.geneontology.org/amigo/term/GO:0007212	32	4	0.684971	5.83967	0.00461907	0.0318675	25479;83579;293860;364382	geneontology_Biological_Process_noRedundant	Gnb5;Vps35;Prmt5;Flna
GO:0030900	forebrain development	http://amigo.geneontology.org/amigo/term/GO:0030900	295	14	6.31457	2.21709	0.00464362	0.0318675	24525;24654;24907;25150;25613;26956;29647;29715;117550;293860;299858;310392;310533;363288	geneontology_Biological_Process_noRedundant	Lrp1;Plcb1;Kif1a;Kif5b;Fyn;Cask;Kras;Rapgef2;Slc8a1;Ak3;Flna;Dmd;Ptprz1;Slc7a11
rno04520	Adherens junction	http://www.kegg.jp/kegg-bin/show_pathway?rno04520+25150+63836+682507+682937+81634+84353	73	6	1.56259	3.83978	0.00469748	0.0320583	25150;63836;682507;682937;81634;84353	pathway_KEGG	Wasf3;Fyn;Wasl;Ctnnb1;Actn1;Actn4
rno04071	Sphingolipid signaling pathway	http://www.kegg.jp/kegg-bin/show_pathway?rno04071+170851+24525+24654+24672+24887+25150+29340+299147	122	8	2.61145	3.06343	0.00472276	0.0320583	170851;24525;24654;24672;24887;25150;29340;299147	pathway_KEGG	Plcb1;Map2k1;Fyn;Prkce;Kras;Ppp2r5e;Bax;Ppp2ca
GO:0006887	exocytosis	http://amigo.geneontology.org/amigo/term/GO:0006887	265	13	5.67241	2.29179	0.00477269	0.0322221	24367;29340;56029;59267;64516;114114;116546;171337;171455;287606;298771;299799;303222	geneontology_Biological_Process_noRedundant	Dnm1l;Prepl;Prkce;Rap1b;Syt7;Ralb;Rab21;Fgg;Sept4;Exoc2;Srcin1;Arhgap44;Vps45
rno04072	Phospholipase D signaling pathway	http://www.kegg.jp/kegg-bin/show_pathway?rno04072+116546+140694+170851+24415+24416+24525+24654+25150+56718	149	9	3.18939	2.82185	0.0048115	0.0323095	116546;140694;170851;24415;24416;24525;24654;25150;56718	pathway_KEGG	Plcb1;Grm2;Mtor;Map2k1;Fyn;Grm3;Ralb;Kras;Dnm1
GO:0031503	protein-containing complex localization	http://amigo.geneontology.org/amigo/term/GO:0031503	177	10	3.78874	2.6394	0.0048616	0.0324713	25479;25489;25498;54319;64053;116546;116563;140694;170851;303222	geneontology_Biological_Process_noRedundant	Dlg2;Npm1;Nedd4;Map2k1;Vps35;Ralb;Ap2m1;Ezr;Dnm1;Arhgap44
GO:1901657	glycosyl compound metabolic process	http://amigo.geneontology.org/amigo/term/GO:1901657	98	7	2.09772	3.33695	0.0050678	0.0336685	25604;26956;29562;117272;171116;303179;100363253	geneontology_Biological_Process_noRedundant	Prpsap2;Opa1;Nt5c2;Prps1;Pcmt1;Guk1;Ak3
GO:0097305	response to alcohol	http://amigo.geneontology.org/amigo/term/GO:0097305	299	14	6.4002	2.18743	0.00521971	0.0344942	24248;24423;25150;25604;29275;29598;81729;84353;116685;117099;245981;289820;293481;315222	geneontology_Biological_Process_noRedundant	Actr2;Atp2b1;Fyn;Rpl15;Actc1;Cat;Bdh1;Lmnb1;Pcmt1;Ctnnb1;Rpl10a;Tufm;Gstm1;Arsa
GO:0045454	cell redox homeostasis	http://amigo.geneontology.org/amigo/term/GO:0045454	53	5	1.13448	4.40729	0.00539705	0.0352927	116598;286906;298942;362776;100362805	geneontology_Biological_Process_noRedundant	Dld;Pdia6;Txndc5;Pdia4;Glrx5
GO:0005811	lipid droplet	http://amigo.geneontology.org/amigo/term/GO:0005811	53	5	1.13448	4.40729	0.00539705	0.0352927	25035;29254;116643;171337;246216	geneontology_Cellular_Component_noRedundant	Vcp;Cyb5r3;Mgll;Rap1b;Prpf19
rno05012	Parkinson disease	http://www.kegg.jp/kegg-bin/show_pathway?rno05012+116728+117287+25282+293991+301123+315167+361385+362440+64539	152	9	3.25361	2.76616	0.00547437	0.0356119	116728;117287;25282;293991;301123;315167;361385;362440;64539	pathway_KEGG	Ndufa6;Ndufa9;Ndufa11;Sept5;Ndufb8;Park7;Ndufv3;Ndufb7;Cox6a1
rno00062	Fatty acid elongation	http://www.kegg.jp/kegg-bin/show_pathway?rno00062+140547+170465+171155+29411	34	4	0.727781	5.49616	0.0057611	0.0372829	140547;170465;171155;29411	pathway_KEGG	Echs1;Acaa2;Ppt1;Hadhb
GO:0098876	vesicle-mediated transport to the plasma membrane	http://amigo.geneontology.org/amigo/term/GO:0098876	77	6	1.64821	3.64031	0.0060951	0.0392411	25479;54190;171455;303222;317381;362587	geneontology_Biological_Process_noRedundant	Ccdc22;Macf1;Vps35;Rabep1;Exoc2;Arhgap44
GO:0061564	axon development	http://amigo.geneontology.org/amigo/term/GO:0061564	305	14	6.52863	2.1444	0.00619066	0.039652	25152;25415;25529;25613;60328;65208;79559;81732;89816;290640;299799;301252;316539;684352	geneontology_Biological_Process_noRedundant	Ptprs;Hsp90ab1;Alcam;Twf2;Dpysl5;Picalm;Epha4;Map1s;Actr3;Crmp1;Rab21;Map1a;Mark2;Ptprz1
GO:0016790	thiolester hydrolase activity	http://amigo.geneontology.org/amigo/term/GO:0016790	35	4	0.749187	5.33912	0.00639673	0.0407629	24439;29411;50671;499913	geneontology_Molecular_Function_noRedundant	Abhd12;Hagh;Fasn;Ppt1
GO:0007215	glutamate receptor signaling pathway	http://amigo.geneontology.org/amigo/term/GO:0007215	78	6	1.66962	3.59364	0.00648724	0.0409797	24415;24416;24654;25150;29546;117287	geneontology_Biological_Process_noRedundant	Plcb1;Grm2;Park7;Fyn;Grm3;Homer1
GO:0044782	cilium organization	http://amigo.geneontology.org/amigo/term/GO:0044782	214	11	4.58074	2.40136	0.00649639	0.0409797	29167;56003;64551;81732;83788;117515;170821;287606;289820;293860;305227	geneontology_Biological_Process_noRedundant	Sept2;Actr2;Sept3;Sept9;Dctn1;Actr3;Sept7;Sept11;Sept4;Flna;Atxn10
rno05010	Alzheimer disease	http://www.kegg.jp/kegg-bin/show_pathway?rno05010+24654+25282+29154+293991+299858+301123+315167+361385+362440+64539	185	10	3.95999	2.52526	0.00659472	0.041391	24654;25282;29154;293991;299858;301123;315167;361385;362440;64539	pathway_KEGG	Lrp1;Plcb1;Ndufa6;Ndufa9;Ndufa11;Ndufb8;Ndufv3;Ndufb7;Capn2;Cox6a1
rno04961	Endocrine and other factor-regulated calcium reabsorption	http://www.kegg.jp/kegg-bin/show_pathway?rno04961+116563+140694+24654+29598+29715	56	5	1.1987	4.17119	0.00682091	0.0425966	116563;140694;24654;29598;29715	pathway_KEGG	Plcb1;Atp2b1;Slc8a1;Ap2m1;Dnm1
GO:0090407	organophosphate biosynthetic process	http://amigo.geneontology.org/amigo/term/GO:0090407	408	17	8.73338	1.94656	0.00701954	0.0436189	24159;24479;25014;25104;25630;26956;29154;29562;60666;64300;116643;117272;170851;298942;303179;311254;361596	geneontology_Biological_Process_noRedundant	Prpsap2;Pdhx;Vcp;Pc;Map2k1;Prps1;Acat1;Dld;Pkm;Acly;Capn2;Guk1;Idh2;Mthfd1;Ak3;Idh1;Gpd1
GO:0016903	oxidoreductase activity, acting on the aldehyde or oxo group of donors	http://amigo.geneontology.org/amigo/term/GO:0016903	36	4	0.770592	5.19081	0.00707723	0.0437597	29711;291450;298942;311254	geneontology_Molecular_Function_noRedundant	Pdhx;Dld;Aldh7a1;Bckdhb
GO:0006605	protein targeting	http://amigo.geneontology.org/amigo/term/GO:0006605	188	10	4.0242	2.48496	0.00735595	0.045259	25150;25489;81732;84595;171139;291624;294708;300111;361833;363707	geneontology_Biological_Process_noRedundant	Nedd4;Fyn;Samm50;Lars;Actr3;Ank3;Sgtb;Srp68;Nucb1;Timm9
GO:0007584	response to nutrient	http://amigo.geneontology.org/amigo/term/GO:0007584	280	13	5.99349	2.16902	0.00747695	0.045778	24186;24248;25150;25630;29598;29711;29715;56718;117099;171116;308100;315222;362029	geneontology_Biological_Process_noRedundant	Opa1;Mtor;Agl;Atp2b1;Fyn;Cat;Pkm;Bdh1;Slc8a1;Alb;Bckdhb;Arsa;Acat2
GO:0030427	site of polarized growth	http://amigo.geneontology.org/amigo/term/GO:0030427	160	9	3.42485	2.62785	0.00758946	0.0462401	25613;29753;83825;117550;171114;192361;301252;316539;684352	geneontology_Cellular_Component_noRedundant	Hsp90ab1;Dclk1;Kif5b;Ndrg2;Twf2;Ppp1r2;Epha4;Ywhae;Ptprz1
GO:1903293	phosphatase complex	http://amigo.geneontology.org/amigo/term/GO:1903293	37	4	0.791997	5.05052	0.00780385	0.047087	24668;29149;116670;299147	geneontology_Cellular_Component_noRedundant	Strn;Ppp1ca;Ppp2r5e;Ppp1r12a
rno05216	Thyroid cancer	http://www.kegg.jp/kegg-bin/show_pathway?rno05216+170851+24525+24887+84353	37	4	0.791997	5.05052	0.00780385	0.047087	170851;24525;24887;84353	pathway_KEGG	Map2k1;Kras;Ctnnb1;Bax
