# Supplementary material for: Rasal1: A candidate exercise mimetic to increase adult hippocampal neurogenesis in middle age
Source: Research Square preprint supplement (doi:10.21203/rs.3.rs-8394751/v1), 2026-02-13
Supplement: Supplementary file 2 [file 1e72981fbb41b0b570adb6af.xlsx]

## Sheet: Info
sheet	study	matrix	modality	dg
2	Discovery	Dentate Gyrus	Proteomics	Dorsal
3	Discovery	Dentate Gyrus	Proteomics	Ventral
4	Discovery	Serum	Proteomics	D3ZHY9_Rasal1_Ventral
5	Discovery	Serum	Proteomics	D3ZHY9_Rasal1_Dorsal
6	Discovery	Serum	Metabolomics	D3ZHY9_Rasal1_Ventral
7	Discovery	Serum	Metabolomics	D3ZHY9_Rasal1_Dorsal

## Sheet: sheet_2
protein_id	gene_symbol	cor	p	fdr	cor_sign
F1M3W5	Dmxl2	0.850307	5.25375e-11	1.04392e-07	Positive
P10687	Plcb1	0.802126	4.06687e-09	1.54612e-06	Positive
P30835	Pfkl	0.801961	4.11944e-09	1.54612e-06	Positive
Q5U1Z0	Rab3gap2	0.808197	4.33685e-09	1.54612e-06	Positive
D3ZWX4	Nckipsd	0.797707	5.70681e-09	1.54612e-06	Positive
F1LRI7	Aak1	0.796996	6.02198e-09	1.54612e-06	Positive
Q63622	Dlg2	0.79658	6.214e-09	1.54612e-06	Positive
D4A1V5	Kif21a	0.796556	6.22493e-09	1.54612e-06	Positive
B0BNK1	Rab5c	0.789183	1.07233e-08	2.07745e-06	Positive
O35303	Dnm1l	0.788389	1.13552e-08	2.07745e-06	Positive
A0A0G2JSV0	Ndrg2	0.788212	1.15007e-08	2.07745e-06	Positive
P97710	Sirpa	0.786024	1.34484e-08	2.10549e-06	Positive
D3ZES7	Plxna4a	0.785686	1.37752e-08	2.10549e-06	Positive
G3V7P8	Ndrg4	0.778169	2.32443e-08	3.29904e-06	Positive
F1MA36	Sptbn2	0.772419	3.42201e-08	4.40716e-06	Positive
P45479	Ppt1	0.771869	3.54879e-08	4.40716e-06	Positive
P11505-4	Atp2b1	0.766999	4.87796e-08	5.70147e-06	Positive
F1M9N9	Ank2	0.765371	5.41578e-08	5.97842e-06	Positive
F1LSR8	Cacna2d3	0.758697	8.24625e-08	8.21213e-06	Positive
P22062	Pcmt1	0.758163	8.52345e-08	8.21213e-06	Positive
B4F7C7	Hebp1	0.757259	9.01217e-08	8.21213e-06	Positive
Q5HZA6-2	Prepl	0.757115	9.09244e-08	8.21213e-06	Positive
Q9WU70-3	Stxbp5	0.755271	1.01794e-07	8.57675e-06	Positive
A0A0G2K8W9	Sptbn1	0.754984	1.03594e-07	8.57675e-06	Positive
A0A096MKH2	Vta1	0.760004	1.18648e-07	9.04457e-06	Positive
O08839-2	Bin1	0.752108	1.23276e-07	9.04457e-06	Positive
D3ZDH8	Sept5	0.751958	1.24397e-07	9.04457e-06	Positive
D4A3V2	Ndufa6	0.751553	1.27452e-07	9.04457e-06	Positive
Q6AXX6	Fam213a	0.748474	1.53084e-07	1.04889e-05	Positive
Q9QZA2	Pdcd6ip	0.746686	1.7006e-07	1.12636e-05	Positive
D4A5I9	Myo6	0.739883	2.51803e-07	1.61134e-05	Positive
A0A0G2JTH4	Cd47	-0.739324	2.59924e-07	1.61134e-05	Negative
Q5XI34	Ppp2r1a	0.738778	2.68084e-07	1.61134e-05	Positive
P04631	S100b	0.738055	2.79249e-07	1.61134e-05	Positive
Q5M9H7	Dnaja2	0.736847	2.98857e-07	1.61134e-05	Positive
Q99PD4	Arpc1a	0.736806	2.99542e-07	1.61134e-05	Positive
Q68FT1	Coq9	0.73664	3.02344e-07	1.61134e-05	Positive
Q6IN22	Ctsb	0.7363	3.08157e-07	1.61134e-05	Positive
P97536	Cand1	0.735175	3.28104e-07	1.6268e-05	Positive
P62138	Ppp1ca	0.734869	3.33741e-07	1.6268e-05	Positive
A0A0G2JXA8	Flot2	0.734765	3.35676e-07	1.6268e-05	Positive
F7FHF7	LOC100911485	0.73267	3.76881e-07	1.78301e-05	Positive
Q80Z30	Ppm1e	0.730717	4.1943e-07	1.93816e-05	Positive
A0A0G2JZM8	Clasp2	0.730218	4.30989e-07	1.94631e-05	Positive
Q08602	Rabggta	0.729746	4.42204e-07	1.95258e-05	Positive
A0A0G2JWA8	Macf1	0.728287	4.78555e-07	2.03668e-05	Positive
B2GV79	Pdxp	0.728164	4.81751e-07	2.03668e-05	Positive
P50475	Aars	0.727172	5.08163e-07	2.10358e-05	Positive
Q2IBD4-2	Cttnbp2	0.725515	5.55282e-07	2.24229e-05	Positive
A1L1J8	Rab5b	0.725215	5.64241e-07	2.24229e-05	Positive
A0A0G2JW28	Add3	0.724557	5.84342e-07	2.27664e-05	Positive
P35571	Gpd2	0.723301	6.24535e-07	2.34681e-05	Positive
D3ZDC0	Nlgn3	0.723257	6.25972e-07	2.34681e-05	Positive
G3V8A5	Vps35	0.721166	6.98733e-07	2.55326e-05	Positive
A0A0G2JYF0	Slc4a10	0.720948	7.06741e-07	2.55326e-05	Positive
D3ZCV0	Actn2	0.720467	7.24733e-07	2.57151e-05	Positive
Q66HM7	Ssb	0.720057	7.40373e-07	2.58091e-05	Positive
Q80W98	Sgtb	0.719365	7.67546e-07	2.61294e-05	Positive
F1LQN3	Rtn4	0.719157	7.75861e-07	2.61294e-05	Positive
Q62636	Rap1b	0.716542	8.87993e-07	2.9078e-05	Positive
A0A0G2K4Y7	NA	0.716355	8.96524e-07	2.9078e-05	Positive
G3V849	Dlgap1	0.716122	9.07315e-07	2.9078e-05	Positive
P04182	Oat	0.714936	9.64004e-07	3.04044e-05	Positive
Q66WT9	Picalm	0.712544	1.08837e-06	3.3777e-05	Positive
Q5XIM9	Cct2	0.711476	1.14854e-06	3.3777e-05	Positive
Q6IMX4	Ppap2b	-0.71874	1.1564e-06	3.3777e-05	Negative
A0A0G2K1Q9	Epb41l3	0.71122	1.1634e-06	3.3777e-05	Positive
Q5GFD9	Impact	0.711072	1.17208e-06	3.3777e-05	Positive
A0A0H2UHG3	Cul5	0.726073	1.17293e-06	3.3777e-05	Positive
D3ZS58	Ndufa2	-0.709848	1.2461e-06	3.49101e-05	Negative
A0A0G2K2L8	Cask	0.709827	1.24742e-06	3.49101e-05	Positive
Q5BJN7	LOC100360647	-0.731982	1.29254e-06	3.54775e-05	Negative
A0A096MJ42	Dlg3	0.708885	1.30737e-06	3.54775e-05	Positive
Q5I0D1	Glod4	0.708672	1.32126e-06	3.54775e-05	Positive
P11030	Dbi	0.708118	1.35808e-06	3.55571e-05	Positive
Q68FX9	Sirt5	0.70809	1.36001e-06	3.55571e-05	Positive
A0A0G2K9L2	NA	0.707631	1.39122e-06	3.59007e-05	Positive
F7FG31	Ctbp1	0.706607	1.46334e-06	3.72777e-05	Positive
P09216	Prkce	0.704475	1.62465e-06	4.06937e-05	Positive
A0A0G2K719	Ddx3y	0.704101	1.65455e-06	4.06937e-05	Positive
Q8R431	Mgll	0.704048	1.65888e-06	4.06937e-05	Positive
H1UBN0	Cpne7	0.703517	1.70227e-06	4.12489e-05	Positive
G3V8P7	Rin1	0.710276	1.75725e-06	4.20681e-05	Positive
Q6P9U8	Eif3h	0.699247	2.09149e-06	4.94737e-05	Positive
D3ZE15	LOC100911483	-0.698463	2.17127e-06	5.07567e-05	Negative
Q5M7U6	Actr2	0.698098	2.20938e-06	5.10469e-05	Positive
P63045	Vamp2	-0.697156	2.31039e-06	5.23204e-05	Negative
P17220	Psma2	0.697095	2.31716e-06	5.23204e-05	Positive
G3V6L4	Kif5c	0.696417	2.3927e-06	5.34189e-05	Positive
B2RYS2	LOC685596	0.694485	2.62062e-06	5.75424e-05	Positive
Q4KM49	Yars	0.694365	2.63531e-06	5.75424e-05	Positive
D4A6C5	Arhgap1	0.693723	2.71574e-06	5.86541e-05	Positive
F1MAA3	LOC100909464	0.692777	2.83841e-06	6.06443e-05	Positive
D4A8U7	Dctn1	0.692479	2.87809e-06	6.08379e-05	Positive
P12785	Fasn	0.689483	3.3058e-06	6.90249e-05	Positive
Q5RKI1	Eif4a2	0.689293	3.33487e-06	6.90249e-05	Positive
F8WFW5	Pde2a	0.688795	3.41194e-06	6.98921e-05	Positive
F1LMH0	Sept3	0.688445	3.46714e-06	7.02435e-05	Positive
Q4V7D4	Fam126b	0.695664	3.4998e-06	7.02435e-05	Positive
Q5XHX3	Enah	0.686962	3.71017e-06	7.37211e-05	Positive
M0RAX4	Gnb5	0.68619	3.84259e-06	7.55962e-05	Positive
M0RD40	Sik3	0.684364	4.17347e-06	8.11664e-05	Positive
Q9JHU0	Dpysl5	0.684184	4.20742e-06	8.11664e-05	Positive
Q4V8H5	Dnpep	0.682828	4.47172e-06	8.54357e-05	Positive
Q62658	Fkbp1a	0.682094	4.62113e-06	8.7207e-05	Positive
D3ZQG6	Trim2	0.681944	4.65221e-06	8.7207e-05	Positive
F1LQJ7	Pck2	0.681268	4.79456e-06	8.90355e-05	Positive
P0DP31	Calm2	0.680284	5.00884e-06	9.0578e-05	Positive
A0A0G2K1C0	Actr3	0.680246	5.01733e-06	9.0578e-05	Positive
A0A0G2JZ69	Sptan1	0.680212	5.02487e-06	9.0578e-05	Positive
Q9R063-2	Prdx5	-0.679626	5.15709e-06	9.0578e-05	Negative
O88768	Adap1	0.679612	5.16037e-06	9.0578e-05	Positive
Q6BBI8	Ufc1	0.679577	5.16823e-06	9.0578e-05	Positive
P85108	Tubb2a	-0.679257	5.24199e-06	9.0578e-05	Negative
P00173-2	Cyb5a	0.679256	5.24231e-06	9.0578e-05	Positive
F1LMB9	Exoc2	0.675585	6.15861e-06	0.000104808	Positive
Q05140-2	Snap91	0.675538	6.17136e-06	0.000104808	Positive
F1LNY3	Ncam1	0.675017	6.3127e-06	0.000106299	Positive
Q68FR9-2	Eef1d	-0.674088	6.5727e-06	0.000109748	Negative
Q91Z79	Ppfia3	0.673873	6.63407e-06	0.000109849	Positive
Q6PST4	Atl1	0.673219	6.82445e-06	0.000112068	Positive
A0A096MJN4	Sept4	0.672203	7.12979e-06	0.000116122	Positive
P62275	Rps29	-0.671607	7.31477e-06	0.000118166	Negative
Q9ERH3	Wdr7	0.669128	8.13216e-06	0.00013017	Positive
P61765	Stxbp1	0.668965	8.18883e-06	0.00013017	Positive
P62963	Pfn1	0.66837	8.39829e-06	0.00013244	Positive
D4AEH9	Agl	0.668005	8.52917e-06	0.000133445	Positive
A0A1W2Q6Q2	Dclk1	0.667575	8.68565e-06	0.000134831	Positive
F1LNF1	Hnrnpa2b1	0.667009	8.89591e-06	0.000137025	Positive
A0A0G2K1D2	NA	0.66651	9.08501e-06	0.000138861	Positive
A0A0G2K261	Iars2	0.666281	9.17307e-06	0.000139137	Positive
D4AE00	Ap3b2	0.664847	9.742e-06	0.000146647	Positive
Q62717	Cadps	0.662464	1.07591e-05	0.000160739	Positive
Q05175	Basp1	0.660362	1.17353e-05	0.000174016	Positive
P63319	Prkcg	0.659763	1.20277e-05	0.00017703	Positive
A0A0H2UI35	Homer1	0.658659	1.25847e-05	0.000183866	Positive
P19627	Gnaz	0.656791	1.35803e-05	0.000196964	Positive
P41542	Uso1	0.655487	1.43175e-05	0.000206151	Positive
M0R9X8	Dync1h1	0.654511	1.48925e-05	0.000211472	Positive
P35439	Grin1	0.654499	1.48999e-05	0.000211472	Positive
D3ZVQ0	Usp5	0.653599	1.54491e-05	0.000217712	Positive
A0A0G2JVL6	NA	0.653219	1.56865e-05	0.000219501	Positive
F1LPP6	Akap5	0.652067	1.64265e-05	0.000227356	Positive
A0A0G2JSH9	Prdx2	0.65199	1.64767e-05	0.000227356	Positive
Q00981	Uchl1	0.651482	1.68143e-05	0.000230414	Positive
Q5FVI6	Atp6v1c1	0.650769	1.7298e-05	0.000235418	Positive
O55096	Dpp3	0.650038	1.78072e-05	0.000239567	Positive
D4ABK7	Hnrnph3	-0.649986	1.7844e-05	0.000239567	Negative
O88767	Park7	0.649542	1.8161e-05	0.000242187	Positive
D3ZAN3	Ganab	0.6477	1.95289e-05	0.000257097	Positive
A0A0G2K5X6	Ntrk2	-0.647688	1.95378e-05	0.000257097	Negative
Q5U1Z9	Mtx2	0.646985	2.00848e-05	0.000262465	Positive
P07936	Gap43	0.64682	2.02154e-05	0.000262465	Positive
P17764	Acat1	0.64666	2.0342e-05	0.000262465	Positive
B4F7A3	Lgalsl	0.646302	2.06292e-05	0.000262897	Positive
A0A0G2K9V6	Tars	0.646289	2.06401e-05	0.000262897	Positive
Q99JD5	Bcat1	0.645966	2.09019e-05	0.000264535	Positive
G3V9Y1	Myh10	0.645736	2.1091e-05	0.000265239	Positive
D4A133	Atp6v1a	0.644712	2.19489e-05	0.000274234	Positive
O08618	Prpsap2	0.644556	2.20823e-05	0.000274234	Positive
P11506-14	Atp2b2	0.644349	2.22607e-05	0.000274733	Positive
D4ADD7	Glrx5	0.663774	2.54134e-05	0.000311707	Positive
A0A0G2JUL7	Sept11	0.63969	2.66359e-05	0.000324697	Positive
P63326	Rps10	0.638709	2.76508e-05	0.000335013	Positive
P82995	Hsp90aa1	0.63784	2.85793e-05	0.00034216	Positive
D4A2G9	Ranbp1	0.637835	2.85851e-05	0.00034216	Positive
Q3MHS9	Cct6a	0.636318	3.02738e-05	0.000359284	Positive
Q5PPJ6	Lars	0.636228	3.03773e-05	0.000359284	Positive
Q6T487	Actn1	0.635533	3.11832e-05	0.00036551	Positive
F1LMM8	Pdk2	0.635458	3.12716e-05	0.00036551	Positive
A0A0G2K6X6	Mark2	0.635285	3.14756e-05	0.000365743	Positive
G3V6T1	Copa	0.634896	3.19392e-05	0.000368972	Positive
Q4FZT9	Psmd2	0.634283	3.26823e-05	0.000375374	Positive
G3V7C6	Tubb4b	-0.633775	3.33101e-05	0.000378805	Negative
P11980	Pkm	0.633624	3.34984e-05	0.000378805	Positive
A0A0G2K0X4	Rac1	-0.633581	3.35529e-05	0.000378805	Negative
O08816	Wasl	0.63271	3.46611e-05	0.000389105	Positive
P62260	Ywhae	0.632333	3.51506e-05	0.000392383	Positive
F1M4I4	Vps51	0.653927	3.67405e-05	0.00040784	Positive
P04897	Gnai2	0.630918	3.70477e-05	0.000408965	Positive
B5DFN4	Pfdn5	-0.630751	3.72767e-05	0.000409219	Negative
P62815	Atp6v1b2	-0.629055	3.96847e-05	0.00043326	Negative
D4A830	Ppa2	0.628572	4.03951e-05	0.000438607	Positive
P62994	Grb2	0.627752	4.16289e-05	0.000449547	Positive
P62775	Mtpn	0.627585	4.1885e-05	0.000449868	Positive
O35509	Rab11b	0.626717	4.32353e-05	0.000461873	Positive
P63041	Cplx1	-0.625655	4.49394e-05	0.000472173	Negative
P14408-2	Fh	0.625649	4.495e-05	0.000472173	Positive
Q3T1J1	Eif5a	0.625546	4.51184e-05	0.000472173	Positive
Q5I0D5	Lhpp	0.625527	4.51499e-05	0.000472173	Positive
D3Z8D7	LOC100361854	0.63202	4.65232e-05	0.000483987	Positive
P69897	Tubb5	-0.624318	4.71732e-05	0.000488193	Negative
Q68FS2	Cops4	0.62352	4.85533e-05	0.00049926	Positive
A0A0G2JZD1	NA	0.623276	4.89827e-05	0.00049926	Positive
Q5XHZ0	Trap1	0.623269	4.89963e-05	0.00049926	Positive
P09456	Prkar1a	0.622184	5.09482e-05	0.000516501	Positive
Q9ER24	Atxn10	0.621491	5.22303e-05	0.000522932	Positive
P14668	Anxa5	0.621471	5.22671e-05	0.000522932	Positive
Q52KS1	Pfkm	0.621415	5.23722e-05	0.000522932	Positive
F1LY09	Actr3b	0.621231	5.27191e-05	0.000523764	Positive
O08700	Vps45	0.620133	5.4829e-05	0.000542016	Positive
P62329	Tmsb4x	0.619971	5.51462e-05	0.000542452	Positive
P26772	Hspe1	-0.619446	5.61877e-05	0.000547552	Negative
A1L1L6	Rhot1	0.619432	5.62157e-05	0.000547552	Positive
P23711	Hmox2	0.61894	5.72085e-05	0.000550914	Positive
P0CC09	Hist2h2aa3	0.618859	5.73739e-05	0.000550914	Positive
P70600	Ptk2b	0.618719	5.76584e-05	0.000550914	Positive
A0A0G2K7G7	Sept8	0.618714	5.76699e-05	0.000550914	Positive
D3ZDX5	Plxnb1	0.618452	5.82084e-05	0.000553398	Positive
B0BMY7	Twf2	0.618306	5.85101e-05	0.000553617	Positive
O35077	Gpd1	0.61789	5.93797e-05	0.000559183	Positive
F1LVR4	Camk1d	0.648278	6.0163e-05	0.000563859	Positive
P54311	Gnb1	0.617388	6.04438e-05	0.000563859	Positive
P53678	Ap3m2	0.616428	6.25247e-05	0.000578581	Positive
Q68FQ9	Lancl2	0.616337	6.27262e-05	0.000578581	Positive
Q6NYB7	Rab1A	0.61626	6.28955e-05	0.000578581	Positive
B2RYJ7	Actr1b	0.614502	6.69001e-05	0.000612583	Positive
A1L1M0	Prkaca	0.613836	6.84765e-05	0.000624141	Positive
F1LMV9	Coro2b	0.613588	6.90719e-05	0.000626693	Positive
P18163	Acsl1	0.613386	6.95583e-05	0.000628238	Positive
A0A0G2K865	Tpd52	0.613037	7.04101e-05	0.000633054	Positive
P53042	Ppp5c	0.612711	7.12127e-05	0.000637386	Positive
B2RZ72	Arpc4	0.611259	7.48939e-05	0.000665419	Positive
Q63569	Psmc3	0.611212	7.50145e-05	0.000665419	Positive
P35565	Canx	-0.610866	7.59196e-05	0.000668712	Negative
Q2TA68	Opa1	0.610813	7.60588e-05	0.000668712	Positive
P13221	Got1	-0.6106	7.66206e-05	0.000670683	Negative
P25113	Pgam1	0.609794	7.87807e-05	0.000686567	Positive
F1M5N4	Me3	0.608802	8.15121e-05	0.000707269	Positive
G3V7V3	Slc27a4	-0.608367	8.27376e-05	0.000714781	Negative
D3ZC55	Hspa12a	0.608224	8.3144e-05	0.000715182	Positive
Q6AY99	Akr1b10	0.607656	8.47767e-05	0.000726083	Positive
A0A096MJE6	Tnr	0.606748	8.74461e-05	0.000745732	Positive
Q80W89	Ndufa11	0.605902	9.00027e-05	0.000764254	Positive
P35400	Grm7	0.633099	0.000100757	0.000847045	Positive
P40307	Psmb2	0.602373	0.000101401	0.000847045	Positive
B0BN63	Ahsa1	0.602324	0.000101567	0.000847045	Positive
O35814	Stip1	0.602233	0.00010188	0.000847045	Positive
P84083	Arf5	0.602213	0.000101947	0.000847045	Positive
O35112	Alcam	0.602107	0.00010231	0.000847045	Positive
Q5XIC6	Psmd12	0.601372	0.000104865	0.000864592	Positive
F1LRB8	LOC100363915	-0.60787	0.000107438	0.000878671	Negative
P35280	Rab8a	0.623101	0.000107457	0.000878671	Positive
G3V928	Lrp1	0.600144	0.000109258	0.000889735	Positive
P27139	Ca2	0.59984	0.00011037	0.000895123	Positive
Q6P799	Sars	0.599473	0.000111724	0.00090242	Positive
Q64560	Tpp2	0.599019	0.000113426	0.000911733	Positive
Q4QQT3	Celf1	0.61361	0.000113795	0.000911733	Positive
Q09073	Slc25a5	-0.598731	0.000114514	0.000913813	Negative
A0A0G2JVM0	Aldh4a1	-0.604754	0.000119102	0.000944111	Negative
Q63633-2	Slc12a5	0.597418	0.000119602	0.000944111	Positive
Q62844	Fyn	0.604409	0.000120461	0.000944111	Positive
Q5FVJ0	Rufy3	0.5972	0.000120469	0.000944111	Positive
Q8VIJ5	Mgea5	0.597145	0.000120687	0.000944111	Positive
P55161	Nckap1	0.596633	0.000122743	0.00095516	Positive
P68511	Ywhah	0.596555	0.00012306	0.00095516	Positive
D4A9D8	Osbp	0.596423	0.000123597	0.000955589	Positive
B2GV15	Dbt	0.595653	0.000126767	0.0009763	Positive
D3ZHX3	Diras2	0.594841	0.000130187	0.000998768	Positive
P62628	Dynlrb1	0.594645	0.000131028	0.000999872	Positive
P34058	Hsp90ab1	0.594573	0.000131337	0.000999872	Positive
Q5XI77	Anxa11	0.594148	0.000133173	0.00100998	Positive
M0RAE4	Ubxn6	0.601086	0.000134283	0.00101453	Positive
A0A0G2K7R8	Slc44a1	0.593259	0.000137097	0.00103187	Positive
D3ZFQ8	Cyc1	0.592518	0.000140444	0.00105307	Positive
Q6P9U0	Serpinb6	0.591826	0.000143635	0.00107294	Positive
F1M779	Cltc	0.591625	0.000144573	0.0010759	Positive
A0A0G2K4G3	Nedd8	0.590593	0.000149482	0.00110829	Positive
G3V8G2	Psmd5	0.590218	0.000151307	0.00111765	Positive
P62744	Ap2s1	0.589945	0.000152642	0.00112333	Positive
Q80U96	Xpo1	0.588797	0.000158387	0.00115977	Positive
Q6DGG0	Ppid	0.588724	0.000158761	0.00115977	Positive
A0A1P0PBZ6	Trio	0.588468	0.000160071	0.00116506	Positive
G3V6W6	Psmc6	0.587746	0.000163817	0.00118163	Positive
P04906	Gstp1	0.587728	0.000163911	0.00118163	Positive
A0A0G2K724	Mcts1	0.643871	0.000164132	0.00118163	Positive
A8WCF8	Tprg1l	0.587529	0.00016496	0.0011833	Positive
Q6AY84	Scrn1	0.58739	0.000165691	0.00118428	Positive
Q7M0E3	Dstn	0.587057	0.000167465	0.00119266	Positive
A0A0H2UHL9	Dbn1	0.586863	0.000168507	0.00119398	Positive
P63018	Hspa8	-0.586799	0.000168851	0.00119398	Negative
D4ABN3	Synj1	0.586386	0.000171087	0.00120549	Positive
D4A8H8	Cyfip1	0.585886	0.000173835	0.00121917	Positive
Q6P6R2	Dld	0.585759	0.000174539	0.00121917	Positive
Q499N5	Acsf2	-0.5857	0.000174868	0.00121917	Negative
D3ZMY7	Nt5c2	0.592437	0.000177165	0.00123086	Positive
A0A0G2JV31	NA	0.585099	0.000178238	0.00123401	Positive
G3V8T4	Ddb1	0.584866	0.000179558	0.00123883	Positive
A0A0G2K2V5	NA	0.584584	0.00018117	0.00124562	Positive
G3V7T3	Pank4	0.622735	0.000183107	0.00125049	Positive
P81377	Prkar1b	0.584243	0.000183137	0.00125049	Positive
P62859	Rps28	-0.583611	0.000186831	0.00127134	Negative
A0A140TAC3	Epn1	0.582975	0.000190621	0.00128869	Positive
G3V9P7	Htt	0.582965	0.000190677	0.00128869	Positive
A0A0G2K151	Apoe	0.581836	0.000197572	0.00133076	Positive
F1LM47	Sucla2	-0.581458	0.000199928	0.00134208	Negative
P84092	Ap2m1	0.581163	0.000201785	0.00134999	Positive
A0A0G2JTG7	Hnrnph1	0.580216	0.000207856	0.0013794	Positive
Q4KMA2	Rad23b	0.602315	0.000208268	0.0013794	Positive
Q62768	Unc13a	0.580058	0.000208882	0.0013794	Positive
Q64559-1	Acot7	0.580044	0.000208972	0.0013794	Positive
Q99ML5	Pcyox1	0.57994	0.000209652	0.0013794	Positive
Q68FQ0	Cct5	0.579506	0.000212507	0.00139357	Positive
A0A0G2JTB2	Gbe1	0.578585	0.000218686	0.00142726	Positive
Q5XIF3	Ndufs4	-0.578447	0.000219628	0.00142726	Negative
A0A0G2JZM2	Sec23a	0.578421	0.0002198	0.00142726	Positive
A0A0G2JWM2	Sirt2	0.578301	0.000220621	0.00142793	Positive
O35264	Pafah1b2	0.577159	0.000228569	0.00147457	Positive
P19139	Csnk2a1	0.57683	0.000230905	0.00148088	Positive
G3V7S0	Folh1	0.576811	0.000231038	0.00148088	Positive
A0A0H2UHE5	Ppm1a	-0.576185	0.000235547	0.00150493	Negative
Q1RP74	LOC100911774	0.582992	0.000237662	0.00151357	Positive
F1M1D5	Tbcd	0.575568	0.000240068	0.00152054	Positive
F1M9W9	Trappc8	0.575538	0.000240286	0.00152054	Positive
D3ZKK5	Mtmr1	0.575213	0.000242702	0.00153095	Positive
P49088	Asns	0.574885	0.000245158	0.00154155	Positive
Q07009	Capn2	0.574692	0.000246618	0.00154584	Positive
P63331	Ppp2ca	0.574559	0.00024762	0.00154723	Positive
Q6URK4-2	Hnrnpa3	0.574115	0.000251013	0.0015546	Positive
A0A0G2K9A2	Arpc2	0.574114	0.000251026	0.0015546	Positive
Q4KM74	Sec22b	0.574098	0.000251145	0.0015546	Positive
P60892	Prps1	0.573824	0.00025326	0.00156282	Positive
F1LX07	Slc25a12	0.573005	0.000259683	0.00159749	Positive
P62268	Rps23	-0.572207	0.000266073	0.00163175	Negative
G3V8J5	Psd	0.571582	0.00027118	0.00165364	Positive
A0A0G2JZ83	NA	0.571566	0.000271307	0.00165364	Positive
Q5XI78	Ogdh	0.571448	0.000272284	0.00165452	Positive
A0A0G2K1S6	Me1	0.571277	0.000273701	0.00165806	Positive
F1LRV4	Hspa4	0.571073	0.000275396	0.00166326	Positive
Q66HR2	Mapre1	0.569911	0.000285257	0.00171759	Positive
Q6P9V9	Tuba1b	-0.569752	0.000286631	0.00172065	Negative
Q792I0	Lin7c	-0.583797	0.000289563	0.00173191	Negative
Q5RKI0	Wdr1	0.569336	0.000290249	0.00173191	Positive
A0A0H2UHD9	Ncln	0.576107	0.00029277	0.00174172	Positive
A0A0A0MY13	Gpr158	0.568507	0.000297585	0.00176508	Positive
G3V6Y6	Pygb	0.567937	0.000302734	0.00179027	Positive
A0A0G2JTL5	Pc	0.567806	0.000303924	0.00179198	Positive
Q9Z0G8	Wipf3	-0.567565	0.000306129	0.00179964	Negative
F1M013	LOC100910109	0.567249	0.000309037	0.00181138	Positive
P13676	Apeh	0.566901	0.000312276	0.00182498	Positive
Q9JMJ4	Prpf19	0.566667	0.000314473	0.00183243	Positive
D3ZW55	Itpa	0.566486	0.000316176	0.00183697	Positive
B2RYW9	Fahd2	0.565772	0.000322989	0.00187108	Positive
Q6AY09	Hnrnph2	0.565504	0.000325577	0.00188059	Positive
D3ZA84	Tln2	0.564807	0.000332397	0.00191019	Positive
P32232-2	Cbs	0.564784	0.000332625	0.00191019	Positive
A0A0G2K0X9	Sec31a	0.564339	0.00033705	0.00193003	Positive
A0A0G2QC41	Hdac6	0.564081	0.000339642	0.00193928	Positive
O54922	Exoc7	0.570902	0.000341721	0.00194556	Positive
Q62747-2	Syt7	0.563473	0.000345814	0.00195792	Positive
P13852	Prnp	0.563345	0.00034713	0.00195792	Positive
D4A435	Icam5	-0.563275	0.000347845	0.00195792	Negative
D3ZC56	Dst	0.563259	0.000348012	0.00195792	Positive
P04904	Gsta3	0.563181	0.000348818	0.00195792	Positive
A0A0G2K4U8	Stx12	0.562884	0.000351888	0.00196512	Positive
D3ZAG3	Map9	-0.584734	0.000352079	0.00196512	Negative
P08050	Gja1	0.562258	0.000358459	0.00199512	Positive
A0A140TAI6	LOC100361060	-0.56186	0.000362678	0.00201296	Negative
B2RZ27	Sh3bgrl3	0.561333	0.000368354	0.00203335	Positive
A0A0G2JU11	Rapgef2	0.561257	0.000369175	0.00203335	Positive
Q920L2	Sdha	0.561234	0.000369421	0.00203335	Positive
F1M9G6	Taok1	0.5906	0.00037286	0.00203949	Positive
Q62825	Exoc3	0.590529	0.000373616	0.00203949	Positive
Q64428	Hadha	0.56085	0.000373616	0.00203949	Positive
Q641Z9	Sdhc	0.560125	0.000381637	0.00207757	Positive
P02401	Rplp2	0.560014	0.000382887	0.00207868	Positive
D4AEH3	Psmd7	0.559809	0.000385187	0.00208547	Positive
Q63881	Kcnd2	0.559682	0.000386616	0.00208752	Positive
F1M8H6	Pip5k1c	0.559556	0.000388042	0.00208954	Positive
G3V912	Tmx4	0.565033	0.000405553	0.00217793	Positive
Q05982	Nme1	0.557636	0.00041038	0.00219707	Positive
Q5U2S7	Psmd3	0.557557	0.000411328	0.00219707	Positive
Q6JE36	Ndrg1	-0.557303	0.000414362	0.00220734	Negative
Q6AXV4	Samm50	0.557126	0.000416497	0.00220878	Positive
Q68FP1	Gsn	0.586683	0.000416856	0.00220878	Positive
Q5PQK2	Fus	0.556815	0.000420269	0.00222095	Positive
A0A0H2UHC0	Arhgap44	0.556533	0.000423717	0.00223323	Positive
P68182	Prkacb	0.555687	0.000434209	0.00228247	Positive
B2RYS8	Ndufb8	0.555197	0.000440399	0.0023089	Positive
Q812E9	Gpm6a	0.553117	0.000467527	0.00244467	Positive
Q63564	Sv2b	0.552944	0.000469852	0.00245038	Positive
P10824	Gnai1	0.552754	0.000472405	0.00245174	Positive
A0A0G2JTL4	Kit	0.582217	0.00047258	0.00245174	Positive
Q6AYN4	Phyhipl	0.552546	0.000475224	0.00245904	Positive
D4A5L9	LOC679794	-0.551416	0.000490802	0.00253305	Negative
D4A3C2	RGD1304884	0.550851	0.000498767	0.00256468	Positive
Q63396	Sub1	0.550798	0.000499513	0.00256468	Positive
G3V8B3	LOC100910200	0.550383	0.000505439	0.00258842	Positive
O35547-2	Acsl4	0.549448	0.000519023	0.00265115	Positive
A0A140TAB4	H2afy	0.548472	0.000533554	0.00271839	Positive
P54319	Plaa	0.548222	0.000537325	0.0027306	Positive
G3V9W6	Aldh3a2	0.561545	0.000549304	0.00278435	Positive
Q68FX0	Idh3B	0.546945	0.000556993	0.00281615	Positive
Q6AY56	Tuba8	-0.546593	0.000562528	0.00283569	Negative
P62483	Kcnab2	0.546431	0.000565081	0.00283569	Positive
F1LPA3	Iqsec3	0.546319	0.00056686	0.00283569	Positive
P56574	Idh2	0.54631	0.000567016	0.00283569	Positive
P33124	Acsl6	0.546248	0.000567994	0.00283569	Positive
Q63362	Ndufa5	0.54602	0.00057164	0.00284674	Positive
Q5RK08	Gbas	0.545263	0.000583875	0.0029004	Positive
P35332	Hpcal4	0.544621	0.000594441	0.00294552	Positive
E9PTV0	Guk1	0.557867	0.000608012	0.00300527	Positive
P68403-2	Prkcb	0.543509	0.000613125	0.00302303	Positive
O35095	Ncdn	0.543271	0.000617204	0.0030356	Positive
D4A9D6	Dhx9	0.542377	0.000632702	0.00310415	Positive
Q66HA6	Arl8b	0.542193	0.000635931	0.0031123	Positive
F1LUA1	Eea1	0.541974	0.000639795	0.00312352	Positive
G3V9B3	Mag	0.541325	0.000651364	0.00317221	Positive
Q9Z269	Vapb	0.540599	0.000664542	0.00322847	Positive
D3ZQ02	Wdr37	0.53987	0.000678006	0.00328145	Positive
B0BN85	Sugt1	0.53983	0.00067875	0.00328145	Positive
D4A404	Psd3	0.539449	0.000685889	0.00330516	Positive
B0BN65	Fam49a	0.539391	0.000686981	0.00330516	Positive
G3V964	Ntm	0.539034	0.000693745	0.00332964	Positive
Q4G064	Coq5	0.55253	0.000703051	0.00336617	Positive
P10860	Glud1	0.537654	0.000720434	0.00344111	Positive
P28037	Aldh1l1	0.536884	0.000735716	0.00350019	Positive
P49242	Rps3a	-0.536854	0.000736325	0.00350019	Negative
P62278	Rps13	0.535594	0.00076196	0.0036134	Positive
P61980	Hnrnpk	0.535452	0.000764915	0.00361878	Positive
Q9QX69	Lancl1	0.535212	0.000769903	0.00362522	Positive
Q5BJZ3	Nnt	0.535211	0.000769927	0.00362522	Positive
P60522	Gabarapl2	0.580238	0.000776165	0.00364251	Positive
P02688	Mbp	-0.53486	0.000777264	0.00364251	Negative
A0A0G2QC21	Arhgef7	0.534163	0.000792067	0.00370315	Positive
A0A0G2K5N6	Rock2	0.533657	0.000802952	0.00373973	Positive
Q01986	Map2k1	0.533613	0.000803896	0.00373973	Positive
Q62813	Lsamp	-0.533537	0.000805537	0.00373973	Negative
G3V6H5	Slc25a11	0.532807	0.000821524	0.00380505	Positive
Q32Q06	Ap1m1	0.546599	0.000823894	0.00380716	Positive
A0A0G2JY26	Dnajc6	0.532039	0.000838656	0.00386638	Positive
P86182	Ccdc22	0.545687	0.000844021	0.00388078	Positive
D3ZBL5	Inpp4a	0.531611	0.00084833	0.00388078	Positive
D3ZIE9	Aldh18a1	0.531596	0.000848682	0.00388078	Positive
G3V8V3	Pygm	0.531556	0.000849593	0.00388078	Positive
Q75Q39	Tomm70a	0.531132	0.000859273	0.003916	Positive
O08773	Rgs14	0.53768	0.000865181	0.0039264	Positive
F1LNX7	Tssc1	0.530862	0.000865507	0.0039264	Positive
P47860	Pfkp	0.530478	0.000874437	0.00395787	Positive
B0BMX3	S100a16	0.529812	0.000890111	0.00401966	Positive
P63090	Ptn	-0.529548	0.000896384	0.00403881	Negative
B2GV74	Klc2	0.529259	0.000903303	0.00405695	Positive
P38983	Rpsa	0.529137	0.00090625	0.00405695	Positive
F1LRV6	Gmpr	0.550306	0.000906536	0.00405695	Positive
A0A0G2QC17	Pdp1	0.528834	0.000913578	0.00407241	Positive
D3Z9L0	Agk	0.535601	0.00091409	0.00407241	Positive
G3V8L3	Lmna	0.528679	0.000917335	0.00407773	Positive
Q568Z9	Phyhip	0.527444	0.000947861	0.00420402	Positive
Q5U2V8	Emc3	-0.540301	0.000971927	0.00430116	Negative
P84076	Hpca	0.525434	0.000999444	0.0044131	Positive
P47875	Csrp1	0.525161	0.00100664	0.004435	Positive
Q4QQS3	Oscp1	-0.54507	0.00103764	0.00456149	Negative
D3ZDT1	Epb41l2	0.523605	0.00104854	0.00459822	Positive
Q63228	Gmfb	0.523529	0.00105063	0.00459822	Positive
Q6AYD3	Pa2g4	-0.52335	0.00105556	0.00460633	Negative
D3ZML2-2	Brsk2	0.523293	0.00105711	0.00460633	Positive
P63029	Tpt1	0.522934	0.00106707	0.00463955	Positive
Q9QXQ0	Actn4	0.522744	0.00107238	0.00465246	Positive
P10888	Cox4i1	-0.522203	0.00108761	0.00470823	Negative
P11608	Mt-atp8	-0.527925	0.00111651	0.00482282	Negative
D3Z9H2	Hapln4	0.520463	0.00113787	0.00490443	Positive
O55166	Vps52	-0.520238	0.00114449	0.0049223	Negative
P15865	Hist1h1e	-0.520138	0.00114747	0.00492235	Negative
A0A0G2K8T0	Asah1	0.548612	0.00114946	0.00492235	Positive
P50411	Ppp1r2	0.519895	0.00115469	0.00492458	Positive
P18484	Ap2a2	0.519887	0.00115493	0.00492458	Positive
G3V784	Adpgk	0.526057	0.00117136	0.00498393	Positive
Q01066	Pde1b	-0.518951	0.00118317	0.0050234	Negative
P61203	Cops2	0.518539	0.0011958	0.0050662	Positive
G3V6L8	Strn	0.518176	0.00120701	0.00509899	Positive
G3V9M3	Wdr47	0.518045	0.00121108	0.00509899	Positive
A0A0G2JU89	Ubr4	0.524716	0.00121219	0.00509899	Positive
D3ZE85	Frrs1l	-0.517958	0.0012138	0.00509899	Negative
D3ZB78	RGD1559864	0.516811	0.00125005	0.00523405	Positive
Q5M7T6	Atp6v0d1	0.516774	0.00125122	0.00523405	Positive
B4F7A9	Csnk2a2	0.516567	0.00125789	0.0052454	Positive
D3ZBN0	Hist1h1b	-0.516525	0.00125921	0.0052454	Negative
Q5BJU0	Rras2	0.529812	0.00127085	0.00528282	Positive
F1LM33	Lrpprc	0.515991	0.00127653	0.00529532	Positive
P54921	Napa	0.515748	0.00128449	0.00531726	Positive
Q9WUS0	Ak4	0.514425	0.00132849	0.00548798	Positive
D4ABM3	Daam1	0.514233	0.001335	0.00550343	Positive
Q5U2P5	C2cd2l	0.513692	0.00135348	0.00556803	Positive
Q5XIJ3	Idh3g	0.513515	0.00135954	0.00558144	Positive
Q05683	Gad2	0.512594	0.00139162	0.00570135	Positive
M0R6K4	Dock4	0.511817	0.0014192	0.00580239	Positive
P02688-3	Mbp	-0.51834	0.00142396	0.00580986	Negative
D4A208	Srgap2	0.532074	0.00143748	0.00584919	Positive
Q5RJR9	Serpinh1	0.511254	0.00143948	0.00584919	Positive
D3Z8I7	Gstt3	0.511118	0.00144443	0.00585729	Positive
P31662	Slc6a17	0.510844	0.00145439	0.00588569	Positive
P85834	Tufm	0.510301	0.00147437	0.00595442	Positive
O88377	Pip4k2b	-0.509815	0.00149245	0.00601522	Negative
Q5MPA9-3	Dclk2	0.509355	0.00150977	0.0060612	Positive
P40112	Psmb3	0.50935	0.00150996	0.0060612	Positive
Q3B7U9	Fkbp8	0.509249	0.00151378	0.00606429	Positive
Q5EGY4	Ykt6	0.522341	0.00153039	0.00611849	Positive
M0RAK2	LOC684270	-0.50854	0.00154084	0.00614787	Negative
Q64605-2	Ptprs	0.508377	0.00154713	0.00616063	Positive
Q9Z1B2	Gstm5	0.508169	0.00155517	0.00616466	Positive
Q6AYE2	Sh3glb1	-0.508153	0.00155581	0.00616466	Negative
F1LM09	Usp7	0.50811	0.00155745	0.00616466	Positive
Q6PDU7	Atp5l	0.507514	0.00158077	0.00624451	Positive
B5DFN2	Ahcyl1	0.507337	0.00158775	0.00625006	Positive
D4A559	Dmtn	-0.507319	0.00158847	0.00625006	Negative
A0A0G2K654	NA	-0.507106	0.0015969	0.00626626	Negative
Q63198	Cntn1	0.507056	0.00159889	0.00626626	Positive
P52481	Cap2	0.506857	0.00160681	0.00628492	Positive
Q32PX6	Rhog	-0.506544	0.00161933	0.00632144	Negative
P70645	Blmh	0.505809	0.00164914	0.00642517	Positive
G3V7U2	Map1a	0.505623	0.00165673	0.00643277	Positive
Q63570	Psmc4	0.505603	0.00165756	0.00643277	Positive
Q9JJ54-3	Hnrnpd	0.505438	0.00166432	0.00644641	Positive
B0BNE5	Esd	0.504229	0.00171478	0.00662891	Positive
A0A0G2JTR4	NA	0.504105	0.00172004	0.00663634	Positive
Q99MI7	Uba3	0.503629	0.00174029	0.00670147	Positive
P19804	Nme2	0.503049	0.0017653	0.00678464	Positive
Q01728-2	Slc8a1	0.502904	0.00177157	0.00679559	Positive
G3V914	Gria2	0.502746	0.00177849	0.00680867	Positive
Q6PW34	Nrcam	0.502669	0.00178184	0.00680867	Positive
B5DFD8	Sh3bgrl	0.509136	0.00178684	0.00681469	Positive
P84079	Arf1	0.502229	0.00180118	0.00685623	Positive
D4A6G6	LOC100362339	-0.501869	0.00181713	0.00689359	Negative
D3ZW08	Adsl	0.501779	0.00182112	0.00689359	Positive
F1M4A4	Kif1a	0.501773	0.00182141	0.00689359	Positive
F1LV13	Hnrnpm	-0.50122	0.00184619	0.00697409	Negative
Q66HF3	Etfdh	0.501045	0.00185408	0.00699061	Positive
P11951	Cox6c2	0.50075	0.00186746	0.00702774	Positive
P38718	Mpc2	0.506594	0.00190037	0.00713808	Positive
Q5XI19	Fermt2	0.506461	0.00190646	0.00714742	Positive
D3ZLK9	Carkd	0.498988	0.00194927	0.00729417	Positive
P31596	Slc1a2	0.498525	0.00197127	0.00736261	Positive
Q62829	Pak3	-0.497969	0.00199798	0.00744623	Negative
P47971	Nptx1	0.497904	0.00200115	0.00744623	Positive
F1LZV1	Kalrn	0.524747	0.00204685	0.00760204	Positive
Q8R491	Ehd3	0.496515	0.00206936	0.00767132	Positive
O08836	Igbp1	-0.502619	0.00209055	0.00773544	Negative
B5DFK6	Ap3d1	0.495727	0.00210895	0.007779	Positive
P18418	Calr	0.495703	0.00211016	0.007779	Positive
D4AD82	Arhgap35	0.495014	0.00214534	0.00789406	Positive
A0A0G2K542	Ugp2	0.4948	0.0021564	0.00792009	Positive
P04775	Scn2a	0.494351	0.00217968	0.00799081	Positive
P06687	Atp1a3	0.494052	0.00219533	0.00803338	Positive
D4AE02	Fam98b	0.520598	0.00225335	0.00823053	Positive
D3ZLL8	LOC691716	0.492531	0.00227643	0.00829958	Positive
P62755	Rps6	-0.492024	0.00230405	0.0083849	Negative
Q00959	Grin2a	-0.491727	0.00232041	0.00842897	Negative
P27605	Hprt1	0.491314	0.00234324	0.00849073	Positive
P63259	Actg1	-0.491265	0.00234595	0.00849073	Negative
Q5PPH0	Enoph1	0.49024	0.00240357	0.00868344	Positive
A0A0G2K7G2	NA	0.489595	0.00244043	0.00880061	Positive
Q6PEC4	Skp1	0.489156	0.00246584	0.00887613	Positive
A0A0G2K398	Gpx4	0.508995	0.00248635	0.00892887	Positive
P0C5X8	Ttyh1	0.488751	0.00248948	0.00892887	Positive
G3V8V1	Grn	-0.488481	0.00250532	0.00896949	Negative
G3V762	Tsta3	0.500338	0.00258307	0.00923124	Positive
D3ZYH3	LOC100912928	0.493403	0.00259665	0.00926309	Positive
P85845	Fscn1	0.486679	0.00261348	0.00930642	Positive
Q63768	Crk	0.506472	0.0026338	0.00936199	Positive
P60901	Psma6	-0.485706	0.00267356	0.00947475	Negative
Q8CFN2	Cdc42	0.485682	0.00267506	0.00947475	Positive
F1LQI1	Hagh	0.484767	0.00273261	0.00966139	Positive
A0A0G2K1L8	NA	0.484157	0.00277164	0.00978143	Positive
B4F774	Gdap1l1	0.484013	0.00278095	0.00978143	Positive
Q6AXR6	Gsto1	0.484007	0.00278133	0.00978143	Positive
D4A4T0	Stub1	0.483491	0.00281477	0.00988155	Positive
M0R5U4	Adcy9	0.483324	0.00282566	0.00989583	Positive
P02091	Hbb	0.483276	0.0028288	0.00989583	Positive
G3V8Z9	Cops7a	0.482297	0.0028936	0.0101047	Positive
F1M542	Adam22	0.481626	0.0029387	0.0102442	Positive
F1M7K7	Cacng8	0.481127	0.00297263	0.0103444	Positive
Q2PQA9	Kif5b	0.480945	0.00298513	0.0103697	Positive
D4ADD8	Dctn6	-0.486666	0.0030312	0.0105113	Negative
Q9EQS0	Taldo1	-0.480045	0.00304748	0.0105494	Negative
P97878	Exoc5	0.479808	0.00306406	0.0105883	Positive
P07335	Ckb	0.478634	0.00314744	0.0108576	Positive
P14046	A1i3	0.478425	0.00316251	0.0108898	Positive
Q9QZR6	Sept9	0.478352	0.00316774	0.0108898	Positive
P29266	Hibadh	0.477783	0.00320909	0.0110129	Positive
P07943	Akr1b1	0.477331	0.00324232	0.0111077	Positive
Q9WVA1	Timm8a	-0.477022	0.00326516	0.0111568	Negative
B5DEL8	LOC100361505	-0.476985	0.00326788	0.0111568	Negative
P14604	Echs1	0.476872	0.00327631	0.0111664	Positive
A0A0G2JVH4	Immt	0.476632	0.00329423	0.0112083	Positive
B0BNA5	Cotl1	0.476461	0.00330703	0.0112326	Positive
P04636	Mdh2	-0.476219	0.00332525	0.0112752	Negative
A0A0G2K1M2	Dlg1	0.475869	0.00335168	0.0113383	Positive
Q9WVK7	Hadh	0.48217	0.00335526	0.0113383	Positive
P59215-2	Gnao1	0.494993	0.00340471	0.0114858	Positive
P04905	Gstm1	0.475045	0.00341474	0.0115002	Positive
Q6P7Q2	Gpc1	0.474841	0.00343051	0.0115337	Positive
A0A0G2JT63	Cyfip2	0.474384	0.00346606	0.0116335	Positive
Q6P7B0	Wars	0.474127	0.00348626	0.0116816	Positive
F1M949	Ckap5	0.473817	0.00351062	0.0117298	Positive
Q9QX80	Hnrnpab	0.473794	0.00351246	0.0117298	Positive
Q99NA5	Idh3a	0.473127	0.00356551	0.011887	Positive
P63086	Mapk1	0.473009	0.00357504	0.0118988	Positive
P35213	Ywhab	-0.471465	0.00370084	0.0122969	Negative
Q6PDV6	Rps14	-0.471388	0.0037072	0.0122975	Negative
P16446	Pitpna	0.471163	0.00372591	0.0123382	Positive
Q5U300	Uba1	0.471017	0.00373806	0.0123382	Positive
G3V8K2	Gng3	0.47732	0.0037381	0.0123382	Positive
A0A0G2K059	Mcu	0.470708	0.00376398	0.0123759	Positive
Q63798	Psme2	0.476969	0.00376722	0.0123759	Positive
D3ZH36	Elfn2	0.470657	0.00376819	0.0123759	Positive
Q9WVR7	Ppm1f	0.470107	0.00381468	0.0125079	Positive
O88637-2	Pcyt2	0.468405	0.00396167	0.012953	Positive
Q9WUC4	Atox1	0.468369	0.00396478	0.012953	Positive
D4AE96	Ipo7	0.46831	0.00397	0.012953	Positive
Q68FX1	Mpi	0.46789	0.00400708	0.0130526	Positive
Q66H80	Arcn1	0.467429	0.00404812	0.0131647	Positive
F1M6T6	Ppp6r2	-0.486899	0.0040592	0.0131765	Negative
Q5XI39	Cryzl1	0.493926	0.00406502	0.0131765	Positive
Q63525	Nudc	0.46696	0.00409026	0.0132367	Positive
O08662	Pi4ka	0.466574	0.00412522	0.0133281	Positive
F1LV89	Rap1gap	0.466443	0.00413709	0.0133448	Positive
A0A0G2K1I6	Scamp1	0.466261	0.00415374	0.0133768	Positive
F7EMB2	RGD1304704	0.465887	0.00418802	0.0134654	Positive
A9UMV9	Ndufa7l	-0.465794	0.00419666	0.0134706	Negative
E2RUH2	Rnh1	0.465723	0.0042032	0.0134706	Positive
O35244	Prdx6	0.465581	0.00421627	0.0134907	Positive
P29418	Atp5e	-0.464933	0.00427674	0.0136622	Negative
A0A0G2JUC7	Dctn2	0.4646	0.00430804	0.0137235	Positive
M0RAP5	Sbf1	0.464582	0.00430974	0.0137235	Positive
F1MAH8	Clip1	0.463626	0.00440076	0.0139909	Positive
Q3S4A5	Arfgap1	-0.46345	0.0044178	0.0140145	Negative
Q5I0G4	Gars	0.463403	0.00442231	0.0140145	Positive
P08461	Dlat	0.462999	0.00446141	0.014116	Positive
F1LSW7	Rpl14	-0.469085	0.00447512	0.0141368	Negative
O88989	Mdh1	-0.462362	0.00452374	0.0142618	Negative
D3ZC15	Rltpr	0.462308	0.00452905	0.0142618	Positive
F1LMR7	Dpp6	0.462067	0.00455287	0.0143142	Positive
Q07310	Nrxn3	0.461915	0.00456798	0.0143382	Positive
G3V960	Gamt	0.474534	0.00457495	0.0143382	Positive
Q68FT7	Farsb	0.461652	0.0045941	0.0143756	Positive
P17078	Rpl35	-0.460986	0.00466102	0.014562	Negative
F1LNK0	Map2	0.460739	0.00468602	0.0146142	Positive
Q5BJU7	Wasf1	0.460676	0.00469243	0.0146142	Positive
Q60587	Hadhb	0.460571	0.00470305	0.0146244	Positive
F1LTW9	Efr3b	0.4665	0.00473093	0.0146881	Positive
A0A0G2KAS7	Slc1a3	0.460166	0.00474451	0.0147072	Positive
D3ZXF9	Mrpl12	0.472198	0.00480775	0.0148801	Positive
D3ZZC1	Txndc5	0.45925	0.00483929	0.0149544	Positive
P13233	Cnp	0.459147	0.00485004	0.0149643	Positive
Q4V7D2	Rogdi	0.45849	0.00491914	0.0151495	Positive
P31016	Dlg4	0.458402	0.00492841	0.0151495	Positive
F1LSG8	Ccdc132	0.45836	0.00493294	0.0151495	Positive
D3ZPR0	Cse1l	0.458278	0.00494165	0.0151529	Positive
P29314	Rps9	0.45818	0.004952	0.0151612	Positive
P83732	Rpl24	-0.458014	0.0049697	0.015192	Negative
D3ZUW0	Psd3	0.457902	0.00498174	0.0152054	Positive
Z4YNP1	Celf2	0.483734	0.00503188	0.0153349	Positive
D4A4K4	Vps13c	0.462574	0.0051436	0.0156514	Positive
P62890	Rpl30	0.455725	0.00521944	0.0158579	Positive
D3ZWA8	Appl1	0.455615	0.00523163	0.0158706	Positive
D3ZFY8	LOC100912618	-0.455196	0.00527866	0.0159889	Negative
B5DF89	Cul3	0.455084	0.00529119	0.0160024	Positive
A0A0G2K9J2	Atp6v1h	0.454326	0.00537721	0.0162379	Positive
P59215	Gnao1	-0.453314	0.00549399	0.0165653	Negative
F1LMY3	Ptprz1	0.452327	0.00560993	0.0168893	Positive
P14841	Cst3	-0.451892	0.00566166	0.0170192	Negative
D4AD15	Eif4g1	0.451671	0.00568815	0.017073	Positive
P15178	Dars	0.451155	0.00575035	0.0172337	Positive
Q5RKG9	Eif4b	0.463186	0.00580376	0.0173676	Positive
Q3MIE4	Vat1	0.450367	0.00584647	0.0174691	Positive
F1M7L9	NA	0.469092	0.00589042	0.017574	Positive
F1LMZ8	Psmd11	0.449587	0.00594294	0.0177041	Positive
A0A5D0	Cd200	-0.44943	0.00596253	0.0177179	Negative
D4A5X7	Gdap1	0.449407	0.00596543	0.0177179	Positive
P24329	Tst	0.449152	0.00599736	0.0177821	Positive
A0JPJ7	Ola1	0.449092	0.00600494	0.0177821	Positive
Q8CG45	Akr7a2	0.448712	0.00605277	0.0178971	Positive
P60203	Plp1	-0.448095	0.00613135	0.0180739	Negative
F1M9Y7	Tcp11l1	0.448038	0.00613864	0.0180739	Positive
F1LTE0	Tanc2	0.460445	0.00613985	0.0180739	Positive
D3ZJF9	Gla	0.460219	0.00616834	0.0181286	Positive
Q91Y81	Sept2	0.447742	0.00617668	0.0181286	Positive
Q6DGF2	Clint1	0.447286	0.00623561	0.0182469	Positive
F1LMV8	Prkce	0.447232	0.00624262	0.0182469	Positive
Q6IMZ3	Anxa6	0.447217	0.00624453	0.0182469	Positive
B0LT89	Stk24	0.458658	0.00636779	0.0185284	Positive
A0A0G2JZA2	Grpel1	0.446272	0.00636841	0.0185284	Positive
F1MAQ4	Trappc10	0.446269	0.00636885	0.0185284	Positive
D3ZPN3	Mlf2	-0.446111	0.0063897	0.0185619	Negative
P10818	Cox6a1	0.445553	0.00646411	0.0187506	Positive
P19511	Atp5f1	0.445391	0.00648582	0.0187862	Positive
Q6AYI1	Ddx5	-0.445159	0.00651706	0.0188492	Negative
Q5BK63	Ndufa9	0.444911	0.0065505	0.0189184	Positive
A0A0G2K761	Cul2	0.450839	0.00656707	0.0189323	Positive
Q9QXY2-2	Srcin1	0.444735	0.00657438	0.0189323	Positive
F1LSH6	Hcn1	0.456843	0.00660677	0.0189981	Positive
B2GUZ3	Mthfd1l	0.443916	0.00668655	0.0191997	Positive
G3V881	Lingo1	0.476102	0.00678166	0.0194447	Positive
A0A0H2UHQ3	Map1s	0.443089	0.0068013	0.0194729	Positive
Q5EB62	Slc25a46	0.455123	0.00684015	0.019548	Positive
A0A0G2K890	Ezr	0.442762	0.00684723	0.019548	Positive
E9PT53	Wfs1	0.442297	0.00691287	0.0196792	Positive
Q64548	Rtn1	0.442296	0.00691299	0.0196792	Positive
P0C6S7-3	Anks1b	0.442046	0.00694863	0.0197524	Positive
D3ZUY8	Ap2a1	0.441926	0.00696571	0.0197692	Positive
F1LN59	Eif4g2	0.447885	0.00697444	0.0197692	Positive
P06685	Atp1a1	-0.441697	0.00699845	0.0197838	Negative
P62919	Rpl8	-0.44169	0.00699951	0.0197838	Negative
P12075	Cox5b	0.447467	0.00703378	0.0198389	Positive
Q06647	Atp5o	-0.441415	0.00703902	0.0198389	Negative
M0R649	Exoc4	0.441346	0.00704896	0.0198389	Positive
Q63327-2	Mobp	0.447188	0.00707372	0.0198805	Positive
P31424	Grm5	0.44106	0.00709036	0.0198991	Positive
Q71SY3	Tsn	0.453079	0.00712679	0.0199731	Positive
Q6P2A5	Ak3	0.440516	0.00716949	0.0200645	Positive
A0A0G2JSJ3	Slc2a3	0.440214	0.00721386	0.0201603	Positive
F1M3H8	Hnrnpa0	-0.439493	0.00732052	0.0204296	Negative
Q5HZV9	Ppp1r7	0.43895	0.00740183	0.0206275	Positive
P31399	Atp5h	0.43872	0.00743653	0.0206952	Positive
G3V936	Cs	0.438141	0.0075244	0.0209105	Positive
Q9ERS3	Cacna2d1	-0.437873	0.0075654	0.0209951	Negative
D3ZKQ4	Rabl6	0.44354	0.00761293	0.0210975	Positive
Q4V7A0	Wdr61	0.442969	0.00770046	0.0212992	Positive
Q5M963	Cmas	0.442925	0.00770714	0.0212992	Positive
Q62634	Slc17a7	0.436408	0.00779267	0.0214875	Positive
Q5XIT1	Mapre3	0.436381	0.00779691	0.0214875	Positive
A0A0G2K872	Cadm3	0.436308	0.00780854	0.0214897	Positive
D3ZD97	Dhx15	0.441975	0.00785488	0.0215873	Positive
Q499Q4	Pgm1	0.43592	0.00786981	0.0215985	Positive
P62944	Ap2b1	0.435689	0.00790644	0.0216494	Positive
A0A0G2K8H0	Caprin1	0.435581	0.00792361	0.0216494	Positive
G3V6U3	Alg2	0.435563	0.00792647	0.0216494	Positive
A0A0G2K079	Bcas1	0.435529	0.00793192	0.0216494	Positive
A0A0G2JSM7	Add1	-0.434786	0.00805126	0.0219449	Negative
P55051	Fabp7	0.434395	0.0081147	0.0220875	Positive
Q6IN39	Hsd17b4	0.434258	0.00813695	0.0221178	Positive
P62142	Ppp1cb	-0.434157	0.00815339	0.0221322	Negative
G3V6P7	LOC100911597	0.433717	0.0082257	0.022298	Positive
P62762	Vsnl1	0.433352	0.00828591	0.0224306	Positive
P00507	Got2	0.432598	0.00841165	0.0227401	Positive
B0BMW2	Hsd17b10	0.43187	0.00853445	0.0230407	Positive
Q5U318	Pea15	0.43128	0.00863529	0.0232813	Positive
D3ZLC1	Lmnb2	0.43109	0.00866779	0.0233373	Positive
B2GUZ9	Fam49b	0.430674	0.00873971	0.0234991	Positive
F1LMS1	Cacna1e	-0.430361	0.00879406	0.0236132	Negative
Q5U1W6	Apool	0.448064	0.00892421	0.0239304	Positive
Q5FVI3	Lrrc57	0.435426	0.00893953	0.0239391	Positive
A0A0G2JSH2	Bdh1	0.428987	0.00903631	0.0241658	Positive
P63174	Rpl38	0.428882	0.00905502	0.0241832	Positive
A0A0A0MXW1	Bckdhb	0.428751	0.00907861	0.0242137	Positive
Q921A2	Slc2a13	-0.428235	0.00917133	0.024415	Negative
Q5HZE4	Mri1	0.428157	0.00918551	0.024415	Positive
O88917-2	Lphn1	0.428127	0.00919094	0.024415	Positive
P62959	Hint1	-0.427922	0.00922798	0.0244806	Negative
D3ZEI4	Hepacam	0.427828	0.00924515	0.0244935	Positive
A0A0G2KAM3	Pdhb	0.427677	0.0092726	0.0245335	Positive
D3ZQL7	Tppp	-0.427389	0.0093252	0.0246398	Negative
Q5XIH7	Phb2	0.42723	0.00935444	0.0246843	Positive
F7EUU4	NA	0.427084	0.00938124	0.0247222	Positive
P08009	Gstm3	0.426425	0.00950319	0.0250104	Positive
A0A0G2K189	Scrn3	0.438276	0.0095249	0.0250343	Positive
P05765	Rps21	-0.426129	0.0095585	0.025088	Negative
P62870	Tceb2	0.426065	0.00957055	0.025088	Positive
P50398	Gdi1	0.42575	0.00962958	0.0252095	Positive
Q9EPH8	Pabpc1	0.425567	0.00966422	0.0252669	Positive
Q3T1K5	Capza2	-0.425493	0.00967813	0.02527	Negative
Q5QJC9	Bag5	0.431231	0.00969936	0.0252922	Positive
P14669	Anxa3	0.425294	0.0097159	0.0253021	Positive
M0RBJ0	Gng2	0.424126	0.00993949	0.0258505	Positive
P15999	Atp5a1	-0.423851	0.00999292	0.0259555	Negative
Q5XIG4	Ociad1	0.428886	0.0101475	0.0263227	Positive
A0A0G2JTD7	Clasp1	0.42269	0.0102206	0.0264777	Positive
M0RBF0	Safb	-0.434447	0.0102463	0.0265096	Negative
Q5XIG8	Strap	0.422441	0.0102701	0.0265365	Positive
D4A8L9	Btbd17	0.42228	0.0103022	0.0265849	Positive
G3V8Q1	Cope	0.421851	0.0103879	0.0267044	Positive
G3V8B6	Psmd1	0.421836	0.010391	0.0267044	Positive
P13264	Gls	0.421806	0.010397	0.0267044	Positive
Q5U2X6	Ccdc47	0.42178	0.0104022	0.0267044	Positive
G3V9L3	Dusp3	0.439442	0.0105057	0.0269352	Positive
B0BMW0	Rab14	0.421163	0.0105268	0.0269547	Positive
P14480-2	Fgb	0.452449	0.0106007	0.0271089	Positive
P56571	NA	-0.420667	0.0106281	0.027144	Negative
D3ZAI6	Nt5dc3	0.420576	0.0106467	0.0271567	Positive
O35987	Nsfl1c	0.420402	0.0106823	0.0272125	Positive
F1LUY5	Ttc7b	0.42027	0.0107097	0.0272473	Positive
Q03114	Cdk5	0.419884	0.0107893	0.0274149	Positive
P61265	Stx1b	0.419384	0.0108936	0.0276444	Positive
Q6AXT5	Rab21	0.4192	0.0109321	0.0277067	Positive
P62198	Psmc5	0.418815	0.011013	0.0278763	Positive
Q3MIE7	Commd9	-0.457478	0.0110275	0.0278773	Negative
Q6MFX9	Mog	0.41856	0.0110669	0.0279125	Positive
M0RAD5	Clpp	-0.430348	0.0110695	0.0279125	Negative
F1SW39	Psip1	-0.418192	0.0111451	0.0280527	Negative
P81795	Eif2s3	0.418154	0.0111533	0.0280527	Positive
P47942	Dpysl2	-0.417874	0.0112131	0.0281538	Negative
P69682	Necap1	0.417833	0.0112218	0.0281538	Positive
P39052-4	Dnm2	0.417322	0.0113319	0.028394	Positive
Q5M9H4	Atp1b2	0.416909	0.0114216	0.0285562	Positive
F1LXA0	Ndufa12	0.416891	0.0114254	0.0285562	Positive
M0RBJ7	C3	0.416015	0.0116175	0.0290001	Positive
A0A0G2JSU3	Pkn3	-0.415589	0.0117119	0.0291989	Negative
D3ZX42	Rabgap1	0.415498	0.0117322	0.0292129	Positive
Q5M7A7	Cnrip1	-0.415429	0.0117476	0.0292145	Negative
D3ZW15	Sec24b	0.420419	0.0119148	0.0295933	Positive
Q68FU3	Etfb	0.414559	0.0119428	0.0296259	Positive
D3ZBE5	Nek7	0.425938	0.0120169	0.0297646	Positive
F1M8A5	Hypk	-0.419878	0.0120359	0.0297646	Negative
P05426	Rpl7	0.414114	0.0120437	0.0297646	Positive
Q9ERB4-2	Vcan	0.413369	0.0122143	0.0301487	Positive
M0R402	Tmx3	-0.418944	0.0122479	0.0301943	Negative
P41243	Matk	0.418758	0.0122905	0.0302617	Positive
F1M775	Diaph1	0.418402	0.0123722	0.0304252	Positive
A0A0G2JYC6	Ubap2l	-0.423776	0.0125056	0.0307153	Negative
B2RYG6	Otub1	0.411998	0.0125336	0.0307459	Positive
Q9EQX9	Ube2n	0.411752	0.0125916	0.0308502	Positive
A0A0H2UHM5	Pdia3	-0.411342	0.0126888	0.0310452	Negative
P46462	Vcp	0.411285	0.0127025	0.0310452	Positive
D3ZD73	Ddx6	0.411172	0.0127293	0.0310725	Positive
F1LM55	Ccar2	-0.41086	0.0128039	0.0312163	Negative
A0A0G2K293	Negr1	-0.410107	0.0129855	0.0316202	Negative
F1M471	Epm2aip1	0.40946	0.0131432	0.0319652	Positive
A0A0G2K350	Napg	-0.408826	0.0132994	0.0323056	Negative
Q5EB77	Rab18	0.408076	0.0134863	0.032689	Positive
A0A0H2UHQ0	Slc3a2	0.40806	0.0134902	0.032689	Positive
P97846	Cntnap1	0.407412	0.0136535	0.0330444	Positive
Q63666-3	Vamp1	-0.412688	0.0137492	0.0332356	Negative
G3V9S0	Cyb5r1	0.405795	0.0140678	0.0339644	Positive
Q566E4	Hnrnpr	-0.405592	0.0141207	0.0340128	Negative
Q9QYL8	Lypla2	0.405569	0.0141266	0.0340128	Positive
D3ZS72	Prex1	0.423169	0.0141392	0.0340128	Positive
P10960	Psap	0.405441	0.01416	0.0340216	Positive
P15087	Cpe	0.404954	0.0142876	0.0342867	Positive
A1L108	Arpc5l	-0.404766	0.014337	0.0343639	Negative
Q9R1B1	Timm10b	-0.404558	0.014392	0.034454	Negative
D3ZLT1	Ndufb7	0.404114	0.0145098	0.0346943	Positive
A0A0G2K9Q7	Map1lc3b	0.403974	0.0145472	0.0347171	Positive
F1M392	Limch1	0.403948	0.0145543	0.0347171	Positive
P01830	Thy1	0.403851	0.01458	0.0347369	Positive
F1M0Z3	Cpne4	0.403616	0.0146432	0.0348455	Positive
A0A0G2K6H2	Gstz1	0.414466	0.0148067	0.0351925	Positive
A0A0G2JYT1	Erc1	-0.402457	0.014957	0.0355073	Negative
F1M4R7	Cspg5	0.40228	0.0150056	0.03558	Positive
F1LPA6	Padi2	0.402013	0.0150789	0.0357056	Positive
P12711	Adh5	-0.401946	0.0150973	0.0357056	Negative
P62718	Rpl18a	-0.401891	0.0151124	0.0357056	Negative
D4ABB2	Mlc1	0.401789	0.0151406	0.0357296	Positive
P11730	Camk2g	0.401484	0.0152251	0.0358598	Positive
D4A197	Mcee	0.401459	0.0152318	0.0358598	Positive
Q6AXU6	Hn1	-0.401189	0.0153071	0.0359676	Negative
B0BND0	Enpp6	0.401164	0.0153139	0.0359676	Positive
P13084	Npm1	0.40107	0.01534	0.0359866	Positive
Q5D023	Dync1li2	0.400993	0.0153616	0.0359946	Positive
P54645	Prkaa1	0.400681	0.0154492	0.0361574	Positive
P20070-3	Cyb5r3	0.400549	0.0154862	0.0362014	Positive
Q4QQV8	Chmp5	-0.399974	0.0156486	0.0365378	Negative
Q6PDW2	LOC100360604	-0.399647	0.0157419	0.0367126	Negative
D3ZC84	Usp9x	0.399222	0.0158633	0.0369524	Positive
A0A0G2JX74	Mtor	0.398747	0.0160003	0.0372278	Positive
P62907	Rpl10a	0.398655	0.016027	0.0372463	Positive
Q6AYD5	Gspt1	0.398149	0.016174	0.0375103	Positive
P04550	Ptms	-0.398134	0.0161783	0.0375103	Negative
G3V852	Tln1	0.39794	0.016235	0.0375979	Positive
A0A0G2JW34	NA	0.434663	0.0163824	0.0378949	Positive
D4A4L4	Map7d2	0.396981	0.016518	0.0381642	Positive
P28818	Rasgrf1	0.396871	0.0165508	0.0381955	Positive
Q4FZY0	Efhd2	-0.396726	0.0165939	0.0382507	Negative
P03994	Hapln1	0.396417	0.0166861	0.0384187	Positive
G3V6R5	Suox	0.396322	0.0167148	0.0384295	Positive
P04762	Cat	0.396273	0.0167295	0.0384295	Positive
A0A0G2K6J5	Myl6	-0.396123	0.0167745	0.0384885	Negative
D3ZG43	Ndufs3	0.395555	0.0169461	0.0388372	Positive
Q6IMX3	Acads	-0.395063	0.017096	0.0391356	Negative
P29419	Atp5i	0.39492	0.0171398	0.0391908	Positive
D3ZNQ6	Ube2m	-0.39445	0.0172843	0.0394685	Negative
A0A0G2JY22	NA	0.394377	0.0173069	0.0394685	Positive
Q08163	Cap1	0.394332	0.0173208	0.0394685	Positive
B5DFI9	Pdk3	0.393882	0.0174603	0.0397408	Positive
Q63616	Vps33b	0.398924	0.0176038	0.0400214	Positive
Q5YLM1	Dagla	0.398292	0.0178005	0.0404223	Positive
Q4KM38	Srsf10	-0.392143	0.0180086	0.0408483	Negative
A0A5H1ZRV8	Camsap2	0.391044	0.0183622	0.0416028	Positive
Q9ET64	Smpd2	0.407799	0.0184857	0.041835	Positive
Q6AYT3	Rtcb	-0.389703	0.018802	0.0425024	Negative
Q9R1Z0-2	Vdac3	0.388816	0.0190976	0.0431214	Positive
B1WC16	Bclaf1	-0.3886	0.0191699	0.0432344	Negative
A0A0G2JXP3	Nedd4l	0.388537	0.0191911	0.0432344	Positive
P08081-2	Clta	-0.387419	0.0195708	0.0440399	Negative
D4A9P7	LOC100363408	-0.38729	0.0196152	0.0440898	Negative
Q641Y8	Ddx1	0.386861	0.0197626	0.044371	Positive
A0A0G2K7W7	Gsk3a	0.386715	0.0198132	0.0443863	Positive
Q5U316	Rab35	0.386712	0.0198141	0.0443863	Positive
P62630	Eef1a1	0.386118	0.0200203	0.0447977	Positive
P50503	St13	0.386037	0.0200488	0.044811	Positive
B2RZC6	Ilf2	0.385149	0.0203607	0.0454571	Positive
P83868	Ptges3	0.401738	0.0204809	0.0456715	Positive
Q99MZ8	Lasp1	-0.384749	0.0205028	0.0456715	Negative
P63004	Pafah1b1	0.384066	0.0207469	0.046102	Positive
Q5VLR5	Erp44	0.383997	0.020772	0.046102	Positive
A0A0G2K7W8	Hint3	0.400877	0.0207784	0.046102	Positive
P51583	Paics	-0.38395	0.0207888	0.046102	Negative
A0A0G2JV93	Grm3	0.383637	0.0209016	0.0463004	Positive
Q63584	Tmed10	0.383384	0.0209933	0.0464517	Positive
D3ZC89	Fam114a2	-0.383059	0.0211116	0.0466615	Negative
P11980-2	Pkm	0.382566	0.0212919	0.0469619	Positive
D4A0T0	Ndufb10	0.382558	0.0212947	0.0469619	Positive
P30904	Mif	-0.382216	0.0214207	0.0471873	Negative
Q63092	Camkv	0.382123	0.0214552	0.0472109	Positive
O88871	Gabbr2	0.381914	0.0215324	0.0473284	Positive
D4A1Q9	Ttll12	0.381762	0.021589	0.0474004	Positive
Q157S1	Crtc1	-0.381687	0.0216167	0.0474088	Negative
D3ZF26	Tnks1bp1	-0.38152	0.021679	0.0474701	Negative
D3ZU84	Stxbp5l	0.381484	0.0216924	0.0474701	Positive
A0A0G2K0V4	Arhgef2	0.381203	0.0217974	0.0476474	Positive
P06761	Hspa5	-0.380922	0.0219028	0.0478251	Negative
G3V9Z3	Maoa	0.380706	0.0219842	0.0479501	Positive
D4A781	Ipo5	0.380332	0.0221255	0.0481891	Positive
P27867	Sord	0.380288	0.0221423	0.0481891	Positive
P19643	Maob	0.380079	0.0222216	0.0482664	Positive
Q6P6V0	Gpi	0.380067	0.0222264	0.0482664	Positive
P68255	Ywhaq	0.37974	0.0223511	0.0484593	Positive
F1LPG5	LOC688963	-0.379706	0.0223639	0.0484593	Negative
P70550	Rab8b	-0.379618	0.0223977	0.0484795	Negative
B4F7C2	Tubb4a	0.379499	0.0224433	0.0485253	Positive
G3V6H0	LOC100363782	0.37871	0.0227475	0.0491296	Positive
Q6RJR6	Rtn3	0.378523	0.0228202	0.0492331	Positive
D4A6H8	Ctnna2	-0.378306	0.0229046	0.0493617	Negative
P23358	Rpl12	-0.378123	0.0229761	0.049462	Negative
P12346	Tf	0.377078	0.023388	0.0502944	Positive
Q5RJZ6	Scoc	0.398301	0.023956	0.0514208	Positive
B2GV73	Arpc3	0.375643	0.0239636	0.0514208	Positive
B2GV06	Oxct1	0.375574	0.0239915	0.0514251	Positive
Q5RJR2	Twf1	0.374654	0.0243668	0.0521636	Positive
Q9QXU9	Pcsk1n	-0.374601	0.0243885	0.0521636	Negative
Q66HA8	Hsph1	0.374341	0.0244958	0.0523368	Positive
A0A0A0MY16	Cadm2	0.373943	0.0246603	0.0526316	Positive
Q5XIH3	Ndufv1	0.373744	0.0247428	0.0527511	Positive
Q5RKH2	Galk1	0.378934	0.0247782	0.0527698	Positive
P02770	Alb	0.37355	0.0248238	0.0528023	Positive
M0R8B6	Tubb1	0.373495	0.0248466	0.0528023	Positive
F1MA89	Ccny	0.384186	0.0248807	0.0528182	Positive
A0A0G2JZX9	NA	0.378535	0.0249426	0.0528933	Positive
Q9Z1N4	Bpnt1	0.373153	0.0249897	0.0529365	Positive
D3ZT47	Fam171a2	-0.381664	0.0259274	0.0548645	Negative
Q9JKB7	Gda	0.370629	0.0260667	0.0551007	Positive
D4A3E1	Hnrnpll	0.370396	0.0261682	0.0552563	Positive
B0BN94	Fam136a	-0.375502	0.0262244	0.0553163	Negative
M0RCH6	Chmp4b	-0.369743	0.0264541	0.0557266	Negative
A0A0G2K677	NA	0.369695	0.026475	0.0557266	Positive
Q66H12	Naga	0.369476	0.0265717	0.0558709	Positive
P41123	Rpl13	-0.369191	0.0266975	0.0560761	Negative
P36201	Crip2	-0.369108	0.0267341	0.0560937	Negative
Q641Y2	Ndufs2	0.368363	0.0270664	0.0567309	Positive
Q5U2N3	Pitpnm1	-0.368104	0.0271824	0.0568655	Negative
D3Z955	Pgm2l1	0.368092	0.0271878	0.0568655	Positive
G3V8T5	Ruvbl2	0.367931	0.0272604	0.0569572	Positive
P63312	Tmsb10	0.367772	0.0273322	0.0569892	Positive
D4ABI7	LOC100365676	0.372937	0.0273499	0.0569892	Positive
P21575-5	Dnm1	0.367668	0.0273791	0.0569892	Positive
A0A0H2UHX1	Rtn3	0.383951	0.0273904	0.0569892	Positive
A0A0G2JW88	NA	0.366944	0.0277083	0.0575903	Positive
B5DF41	Snph	0.366468	0.0279262	0.0579827	Positive
A0A0H2UHV6	Ppp3r1	0.366395	0.0279596	0.0579914	Positive
Q91V33	Khdrbs1	-0.365942	0.0281688	0.0583643	Negative
A0A0H2UHQ1	Rpl17	-0.365839	0.0282166	0.0584024	Negative
Q6P6Q5	App	-0.365617	0.0283196	0.0585546	Negative
Q5RKJ9	Rab10	0.365055	0.0285816	0.0590349	Positive
G3V7G0	Dync1li1	0.364793	0.0287049	0.059228	Positive
Q80YV8	Cxcl12	-0.375268	0.0287462	0.0592517	Negative
G3V927	Dlgap4	-0.364066	0.0290481	0.0598119	Negative
G3V7L6	Psmc2	-0.363945	0.0291058	0.0598688	Negative
Q32KK2	Arsa	0.391656	0.0293371	0.0602822	Positive
B0LPN4-2	Ryr2	0.363291	0.029418	0.0603793	Positive
F1LP82	Rab2a	0.363234	0.0294452	0.0603793	Positive
P01946	Hba1	0.363072	0.0295232	0.060477	Positive
Q4V7D9	Smpdl3b	0.362741	0.0296829	0.0607414	Positive
D4A304	Diras1	0.378636	0.0297909	0.0608998	Positive
P21575	Dnm1	0.361444	0.0303151	0.0619076	Positive
P02680-2	Fgg	0.361182	0.030444	0.0620183	Positive
P63170	Dynll1	0.361179	0.0304457	0.0620183	Positive
G3V6L9	Fkbp3	0.361144	0.0304629	0.0620183	Positive
G3V728	Nipsnap1	-0.360768	0.0306489	0.0623331	Negative
P11275	Camk2a	-0.360334	0.0308646	0.0627075	Negative
F1LUT4	Atp8a1	0.360149	0.0309572	0.0628315	Positive
Q5XIG0	Nudt9	0.375961	0.0310628	0.0629697	Positive
A0A0G2K0T6	Sncg	0.359887	0.0310887	0.0629697	Positive
Q63372-13	Nrxn1	0.364719	0.0312275	0.0631864	Positive
B2RZ78	Vps29	0.359074	0.0314988	0.0636059	Positive
F2Z3Q8	Kpnb1	0.359074	0.0314988	0.0636059	Positive
B2RYX0	Naca	0.374966	0.0315469	0.0636382	Positive
G3V949	Clip2	0.357978	0.0320587	0.0646051	Positive
P38062	Metap2	0.357705	0.0321996	0.0648234	Positive
D4A2F1	Agrn	-0.357184	0.0324698	0.0652375	Negative
A0A0H2UHZ1	Aqp4	0.357134	0.0324955	0.0652375	Positive
A0JPM9	Eif3j	0.362196	0.0325039	0.0652375	Positive
F1MAR6	Prodh	0.362015	0.0325975	0.0653594	Positive
P37996	Arl3	-0.356697	0.0327239	0.0655469	Negative
P08644-2	Kras	0.355975	0.0331034	0.06624	Positive
G3V803	Cdh2	-0.355587	0.033309	0.0665844	Negative
Q62609	Olfm1	-0.3555	0.0333554	0.0666101	Negative
G3V8G4	Bcan	-0.355361	0.0334291	0.0666903	Negative
Q63803	Gnas	0.355136	0.033549	0.0668625	Positive
Q08877-9	Dnm3	0.354732	0.0337656	0.0672268	Positive
Q4KM73	Cmpk1	-0.354166	0.0340708	0.0677665	Negative
Q8CGU4	Agap2	0.353978	0.0341723	0.0678243	Positive
Q64620	Ppp6c	0.35395	0.0341877	0.0678243	Positive
Q5FVM4	Nono	-0.353923	0.0342023	0.0678243	Negative
Q64303	Pak2	-0.363193	0.0347516	0.0688449	Negative
O35567	Atic	0.352046	0.0352332	0.0696638	Positive
B2RYI2	Srp68	0.352043	0.0352351	0.0696638	Positive
Q63151	Acsl3	0.350903	0.0358734	0.0708553	Positive
Q8VHK2	Caskin1	0.35074	0.0359656	0.0709669	Positive
G3V733	Syn2	0.350656	0.0360129	0.0709898	Positive
Q5FVI4	Cend1	0.350368	0.0361765	0.0712416	Positive
F1M049	Atxn2	-0.359431	0.0368182	0.0724334	Negative
F1M7Q5	Ampd3	0.382482	0.0369799	0.0726796	Positive
Q5XI72	Eif4h	-0.348339	0.0373443	0.0733014	Negative
Q6AYS2	Sfxn1	-0.34827	0.0373845	0.0733014	Negative
E9PSJ4	Spag9	0.348231	0.037407	0.0733014	Positive
P20788	Uqcrfs1	-0.347575	0.0377914	0.0739818	Negative
Q6PDW4	Psmb1	0.347179	0.0380252	0.0743662	Positive
P61354	Rpl27	-0.346419	0.0384773	0.0751763	Negative
P18420	Psma1	0.345983	0.0387384	0.0756121	Positive
A0A0G2K104	Kcnma1	0.345866	0.0388087	0.0756751	Positive
F1LML7	Hip1r	0.345461	0.0390525	0.0760759	Positive
F1M7V4	Pclo	0.360302	0.0394247	0.0767256	Positive
A0A0G2KAL9	Mff	-0.344637	0.0395536	0.0769011	Negative
F1M7V6	Cadm4	0.344485	0.0396464	0.0770062	Positive
G3V6I9	Rpl26	-0.34376	0.0400921	0.077796	Negative
P06302	Ptma	0.343229	0.0404212	0.0783581	Positive
A0A0G2K737	Txnl1	0.342806	0.0406849	0.0787922	Positive
O70593	Sgta	0.341428	0.0415528	0.0802678	Positive
A0A0G2JSZ5	Pdia6	0.341407	0.0415661	0.0802678	Positive
F1M4H5	Nova2	-0.341405	0.041568	0.0802678	Negative
A0A0G2JT06	Gps1	0.340488	0.0421542	0.0813207	Positive
Q8K1Q0	Nmt1	0.340034	0.042447	0.0818062	Positive
G3V741	Slc25a3	-0.33976	0.042624	0.0820678	Negative
P62243	Rps8	-0.339367	0.0428797	0.0824801	Negative
A0A096MIT7	Syn3	0.339228	0.0429704	0.0825747	Positive
F1LQV9	Lin7a	0.339082	0.043066	0.0826785	Positive
G3V7I5	Aldh1b1	-0.338438	0.0434889	0.0834096	Negative
P11884	Aldh2	-0.338305	0.0435772	0.0834984	Negative
P07171	Calb1	-0.338174	0.0436632	0.0835826	Negative
B5DF65	Blvrb	0.337856	0.0438742	0.0839057	Positive
G3V7U4	Lmnb1	0.337598	0.0440457	0.0841527	Positive
F1M7X3	Cdh13	-0.337521	0.0440974	0.0841705	Negative
A0A0G2K3Z9	Prdx1	-0.337001	0.0444452	0.0847529	Negative
Q4V8C7	Prkra	0.357308	0.0446808	0.0851205	Positive
P27615	Scarb2	-0.341162	0.0448919	0.0854409	Negative
A0A0H2UHZ2	Nap1l4	0.335928	0.0451699	0.0858877	Positive
Q4KLF8	Arpc5	0.335673	0.0453437	0.0861356	Positive
A0A0G2K3C1	Cdc37	0.335592	0.0453986	0.0861576	Positive
P37805	Tagln3	-0.335323	0.0455825	0.0864241	Negative
P35465	Pak1	0.335181	0.0456798	0.0865261	Positive
M0R9Q1	LOC100911677	-0.335084	0.0457467	0.0865702	Negative
Q6Q0N1	Cndp2	-0.334882	0.0458858	0.0867508	Negative
P47819	Gfap	-0.33477	0.0459626	0.0868134	Negative
A0A0G2JXN2	NA	0.34452	0.0460105	0.0868214	Positive
Q5U2T9	Fkbp5	0.339301	0.046149	0.0870001	Positive
P62282	Rps11	0.334147	0.0463942	0.0873263	Positive
A0A0G2K642	Acaa2	0.33892	0.0464099	0.0873263	Positive
A0A0A0MY31	Itpr1	0.333534	0.0468214	0.0878856	Positive
P84087	Cplx2	-0.333513	0.046836	0.0878856	Negative
P23385-2	Grm1	0.333508	0.0468399	0.0878856	Positive
Q794E4	Hnrnpf	0.332819	0.0473239	0.0887101	Positive
P21670	Psma4	0.347276	0.047688	0.0893082	Positive
P00406	Mtco2	-0.331393	0.0483392	0.0904426	Negative
X1WI37	LOC100362640	0.330667	0.0488627	0.0913361	Positive
A0A0H2UHS7	Rpl18	0.330547	0.0489494	0.0914121	Positive
P37377	Snca	-0.329849	0.0494579	0.092275	Negative
O08651	Phgdh	-0.329468	0.0497374	0.0926526	Negative
Q62952	Dpysl3	-0.329446	0.0497536	0.0926526	Negative
Q6P7A7	Rpn1	0.32928	0.0498755	0.0927861	Positive
G3V714	Scg5	-0.329174	0.0499537	0.0927861	Negative
A0A0G2JZI2	Eprs	-0.329158	0.0499653	0.0927861	Negative
F1LP59	Rab3gap1	0.328875	0.0501741	0.0930868	Positive
P11661	Mtnd5	0.328683	0.0503167	0.0932643	Positive
Q03555-6	Gphn	-0.32826	0.0506307	0.0936219	Negative
P21707	Syt1	0.328234	0.0506504	0.0936219	Positive
G3V7Q6	Psmb5	0.328233	0.050651	0.0936219	Positive
F1LYA6	Abi2	0.327642	0.0510931	0.0942766	Positive
Q2I6B2	Atp6v0a1	0.327633	0.0511001	0.0942766	Positive
B2RYN0	Pgm3	-0.326954	0.0516113	0.0951313	Negative
A0A0G2JXY9	Epn2	-0.326841	0.051697	0.095201	Negative
B2RYW3	Ndufb9	0.326763	0.0517565	0.0952224	Positive
P62632	Eef1a2	0.32656	0.0519102	0.0954169	Positive
A0A0G2JUZ5	NA	0.335997	0.0520402	0.0955674	Positive
P83941	Tceb1	0.326315	0.0520973	0.0955839	Positive
F1M7W7	Nae1	0.330585	0.05242	0.0960493	Positive
A0A0G2K1G8	NA	0.325856	0.0524477	0.0960493	Positive
A0A1W2Q627	Eif4e	0.325533	0.0526961	0.0964154	Positive
B4F779	Appl2	0.34487	0.0532321	0.0973065	Positive
Q99MG9	Kcnip4	0.329279	0.0534156	0.0975521	Positive
Q8CFD0	Sfxn5	0.324503	0.0534933	0.0976044	Positive
E9PT29	Ddx17	-0.324395	0.0535775	0.0976683	Negative
P10362	Scg2	-0.324037	0.053857	0.0980879	Negative
F1LPK7	Pls3	0.323675	0.0541405	0.0985139	Positive
I6L9G6	Tardbp	0.32336	0.0543886	0.0988748	Positive
A0A0H2UHI7	Atad1	-0.323001	0.054673	0.0993009	Negative
F1MAA5	Rangap1	-0.322845	0.0547962	0.0994338	Negative
Q4FZT2	Ppme1	-0.3221	0.05539	0.10042	Negative
P05696	Prkca	0.320485	0.0566951	0.102692	Positive
B5DF91	Elavl1	0.32033	0.0568219	0.102828	Positive
P62193	Psmc1	0.320241	0.0568944	0.102865	Positive
B2RYQ5	Erh	0.32438	0.0572848	0.103477	Positive
Q3KRE0	Atad3	-0.319661	0.0573705	0.103538	Negative
Q5M9H2	Acadvl	0.319384	0.0575989	0.103856	Positive
A0A0G2JSV6	NA	-0.319034	0.0578878	0.104282	Negative
A0A0G2JZY3	NA	0.328092	0.058179	0.104712	Positive
F1LSC8	Rimbp2	-0.318414	0.0584044	0.105022	Negative
Q8R2H0	Atp6v1g2	-0.317609	0.0590794	0.10614	Negative
Q09167	Srsf5	-0.31706	0.059543	0.106876	Negative
P40329	Rars	0.316957	0.0596309	0.106937	Positive
P85973	Pnp	0.316036	0.0604161	0.108222	Positive
F1M1A6	LOC681355	0.31599	0.0604559	0.108222	Positive
F1LP57	Map2k4	0.315815	0.0606066	0.108394	Positive
A0A0G2K5C8	Stim1	0.320132	0.0608174	0.108673	Positive
D3ZSS1	Taf15	0.319822	0.0610811	0.108991	Positive
Q78P75	Dynll2	0.315236	0.0611052	0.108991	Positive
D3ZT90	Gcdh	0.313731	0.0624187	0.111234	Positive
Q3B8P4	Dcps	0.313123	0.0629561	0.112091	Positive
Q5XI73	Arhgdia	0.312556	0.0634599	0.112887	Positive
B5DFG5	Sept6	0.312364	0.0636314	0.113091	Positive
Q63041	A1m	0.331044	0.0642081	0.114014	Positive
A0A0G2K7C1	Bag6	0.311359	0.0645338	0.11449	Positive
Q9JHY2	Sfxn3	-0.311241	0.064641	0.114578	Negative
D4A644	Map7d1	0.310643	0.065184	0.115437	Positive
Q68FZ8	Pccb	0.315015	0.0652975	0.115535	Positive
F1M6V8	Strn4	0.310228	0.0655623	0.115868	Positive
Q5BJR4	Prune2	-0.329424	0.0656022	0.115868	Negative
P09951	Syn1	-0.309661	0.0660824	0.116612	Negative
Q9ESB5	Necab1	-0.323583	0.0662183	0.116749	Negative
P51635	Akr1a1	0.309328	0.0663897	0.116892	Positive
P0DJJ3	Sgip1	0.309298	0.0664173	0.116892	Positive
P62074	Timm10	-0.308333	0.0673141	0.118366	Negative
M0R9L2	Cntfr	0.307195	0.0683832	0.120139	Positive
P32851	Stx1a	0.305938	0.0695807	0.122135	Positive
B0BNA7	Eif3i	-0.305511	0.0699906	0.122746	Negative
P0DMW1	Hspa1a	-0.305197	0.0702938	0.123169	Negative
E9PTW1	Scamp3	-0.318895	0.0704769	0.123287	Negative
D3ZHI9	Ppp2r5e	0.304998	0.0704854	0.123287	Positive
P32551	Uqcrc2	0.304118	0.0713425	0.124652	Positive
Q62639	Rheb	0.304068	0.0713913	0.124652	Positive
P19945	Rplp0	0.303969	0.0714882	0.124712	Positive
A0A0G2KB98	Gsk3b	0.30371	0.0717413	0.125044	Positive
D3ZZK3	Epha4	0.303638	0.0718124	0.125058	Positive
Q91ZW1	Tfam	-0.307893	0.0719617	0.125208	Negative
Q6AYT7	Abhd12	0.303161	0.072282	0.125656	Positive
M0R5T4	Rac3	-0.316349	0.0728775	0.12658	Negative
P21571	Atp5j	-0.302426	0.0730109	0.126701	Negative
Q6PDV7	Rpl10	-0.302126	0.07331	0.127095	Negative
F7EYB9	Omg	0.30207	0.073366	0.127095	Positive
A0A0A0MXW3	H2afz	0.301542	0.0738952	0.12788	Positive
Q9QUR2-2	Dctn4	0.30149	0.0739476	0.12788	Positive
Q5XIM5	Cdv3	0.301222	0.074217	0.128234	Positive
R9PXU6	Vcl	0.298623	0.0768737	0.132709	Positive
Q5U2X8	Acot9	0.298069	0.0774492	0.133586	Positive
A0A0G2JTW9	NA	0.297975	0.0775474	0.13364	Positive
P19527	Nefl	-0.297574	0.0779668	0.134246	Negative
D4A719	Snx12	0.296877	0.0786996	0.135391	Positive
Q02253	Aldh6a1	-0.296691	0.0788955	0.13561	Negative
P43278	H1f0	-0.296491	0.0791078	0.135805	Negative
F1LYZ8	Ppp1r21	0.296455	0.0791456	0.135805	Positive
F1LPT4	Camkk2	0.296349	0.0792581	0.135881	Positive
Q7TPB1	Cct4	0.295292	0.0803856	0.137695	Positive
G3V864	Lppr4	-0.293792	0.0820075	0.140232	Negative
A0A0H2UHH9	LOC100363469	0.293792	0.0820081	0.140232	Positive
P84100	Rpl19	-0.293524	0.0823004	0.140611	Negative
P0C5H9	Manf	0.293447	0.0823848	0.140635	Positive
Q5XIM7	Kars	0.301866	0.0827291	0.141101	Positive
Q6PEC1	Tbca	0.292986	0.0828893	0.141113	Positive
P20059	Hpx	0.297222	0.0829256	0.141113	Positive
Q6GMN2-2	Baiap2	-0.292932	0.0829493	0.141113	Negative
Q6P9Y4	Slc25a4	0.292803	0.0830904	0.141232	Positive
Q6AZ50	Atg3	0.292649	0.0832602	0.1414	Positive
Q6S3A5	Plec	0.292547	0.083373	0.141471	Positive
Q6AXS5	Serbp1	0.29208	0.08389	0.1422	Positive
A0A0G2KAY8	Sep15	0.310265	0.0839459	0.1422	Positive
A0A0G2JZB8	NA	0.291713	0.0842975	0.142674	Positive
A0A0G2K6X9	Adk	-0.291195	0.084875	0.143529	Negative
P62250	Rps16	-0.291034	0.085056	0.143713	Negative
P18395	Csde1	0.289931	0.0862988	0.145689	Positive
Q9R0I8	Pip4k2a	0.289133	0.0872066	0.14704	Positive
D3ZGS3	Ocrl	0.307169	0.0872475	0.14704	Positive
F7EN52	Cyp46a1	0.287568	0.0890088	0.149752	Positive
Q6PCT9	Psmd6	0.287564	0.0890141	0.149752	Positive
A0A096MJY6	Gbe1	-0.31584	0.0890827	0.149752	Negative
A0A0H2UHE1	Suclg1	-0.287336	0.0892782	0.149954	Negative
D3ZZM9	Ccsap	-0.287045	0.089618	0.150398	Negative
P54900	Scn2b	0.286846	0.0898502	0.15066	Positive
Q68A21	Purb	0.285616	0.0912974	0.152958	Positive
D3ZK97	H3f3c	-0.285148	0.0918521	0.153757	Negative
Q91ZY8	Trim9	-0.28495	0.0920876	0.153911	Negative
P19103	Ppp1r1a	-0.284941	0.0920985	0.153911	Negative
P31421	Grm2	0.2846	0.0925051	0.15446	Positive
B0K020	Cisd1	-0.2834	0.0939488	0.156739	Negative
Q6IMY8	Hnrnpu	-0.283258	0.0941203	0.156893	Negative
A0A0G2K7Y2	Oxr1	0.282942	0.0945043	0.157402	Positive
M0R3V4	LOC501282	0.282504	0.0950371	0.158156	Positive
A0A0G2JVW5	NA	0.282422	0.0951373	0.158191	Positive
Q6P136	Hyou1	-0.28227	0.0953234	0.158368	Negative
A0A0G2JXG3	Tmem30a	-0.28211	0.0955195	0.158561	Negative
P63088-2	Ppp1cc	0.281859	0.0958276	0.158939	Positive
Q9Z327-3	Synpo	-0.281698	0.0960252	0.159036	Negative
Q9JKS6-2	Pclo	0.281681	0.0960461	0.159036	Positive
Q6P6T4-2	Eml2	0.285692	0.096178	0.159122	Positive
P19492-2	Gria3	0.280558	0.097435	0.161068	Positive
P41562	Idh1	0.280432	0.0975918	0.161193	Positive
M0R4R4	Gas7	0.280015	0.0981121	0.161918	Positive
A0A0G2JSI1	Aldh9a1	-0.279812	0.0983666	0.162203	Negative
P85515	Actr1a	0.279508	0.0987481	0.162697	Positive
P54313	Gnb2	0.279371	0.0989202	0.162845	Positive
P24155	Thop1	0.278663	0.0998148	0.164182	Positive
D4A720	Srsf7	0.278024	0.100626	0.16538	Positive
D4ABT8	Hnrnpul2	-0.277649	0.101106	0.16603	Negative
A0A0A0MY09	Hsp90b1	0.276836	0.102149	0.167606	Positive
D4A4P3	LOC100361144	-0.279744	0.103617	0.169735	Negative
Q5XI32	Capzb	0.275704	0.103618	0.169735	Positive
P63039	Hspd1	-0.274283	0.105482	0.172647	Negative
P43138	Apex1	0.274082	0.105748	0.17294	Positive
Q62991	Scfd1	0.277394	0.106674	0.17431	Positive
P15205	Map1b	-0.271722	0.108907	0.177813	Negative
P08082	Cltb	-0.271198	0.109618	0.178827	Negative
D4ABS5	Pithd1	0.271113	0.109734	0.178869	Positive
Q6IRK9	Cpq	-0.288001	0.109945	0.179066	Negative
G3V9T7	Asna1	0.270408	0.110698	0.180145	Positive
Q9QYU2	Tsfm	-0.282141	0.111656	0.181555	Negative
G3V6V1	Rnpep	0.269573	0.111846	0.181716	Positive
G3V856	LOC100912512	0.272674	0.113018	0.183469	Positive
A0A0G2K5V4	NA	0.272509	0.113245	0.183687	Positive
D3ZPT0	Prr36	0.27238	0.113422	0.183825	Positive
O70511-3	Ank3	0.285047	0.113804	0.184293	Positive
P54287	Cacnb3	0.267734	0.114409	0.185079	Positive
D4A554	Eif4g3	0.26764	0.11454	0.185079	Positive
P17077	Rpl9	0.26762	0.114568	0.185079	Positive
D4A601	Taco1	0.298197	0.116138	0.187462	Positive
P05371	Clu	0.266424	0.11626	0.187507	Positive
F1M9V7	Npepps	0.266145	0.116657	0.187995	Positive
O35142	Copb2	0.269954	0.1168	0.188073	Positive
D3ZZP2	Rab39a	-0.278192	0.116975	0.188129	Negative
A0A0G2K931	Psat1	0.265825	0.117113	0.188129	Positive
Q5EBD0	Sec14l2	0.265821	0.117119	0.188129	Positive
P63142	Kcna2	0.265725	0.117256	0.188197	Positive
O35964	Sh3gl1	-0.265378	0.117754	0.188843	Negative
A0A0G2K613	Marcksl1	0.264972	0.118337	0.189626	Positive
O35314	Chgb	0.26437	0.119207	0.190866	Positive
Q4G017	Nisch	0.264024	0.11971	0.191517	Positive
A0A0H2UHF9	Ablim2	-0.263698	0.120184	0.19212	Negative
Q4V8N0	Tinagl1	0.275631	0.120524	0.192328	Positive
P37397	Cnn3	0.27133	0.120611	0.192328	Positive
Q4G061	Eif3b	0.263374	0.120657	0.192328	Positive
Q4AE70-3	Carm1	-0.279888	0.120785	0.192328	Negative
A0A0G2K459	NA	0.263278	0.120798	0.192328	Positive
Q62950	Crmp1	0.262745	0.121579	0.193417	Positive
Q68FW9	Cops3	0.262305	0.122228	0.194294	Positive
P05197	Eef2	-0.260353	0.125135	0.19871	Negative
G3V734	Decr1	0.260306	0.125206	0.19871	Positive
B2RYN1	Fn3krp	-0.260152	0.125436	0.198916	Negative
P49620	Dgkg	0.279812	0.127373	0.201827	Positive
D3ZWV8	Tiam1	-0.262553	0.127572	0.201981	Negative
Q6AY65	Arfip2	0.258416	0.12807	0.202607	Positive
Q566R0	Them4	-0.257983	0.128733	0.203494	Negative
A0A0G2K401	Pcca	0.257905	0.128853	0.203523	Positive
Q9QY17-2	Pacsin2	0.257537	0.129418	0.204253	Positive
A0A0H2UHB7	Slc4a4	0.257378	0.129663	0.204477	Positive
D4A1S6	Ppp1r12a	0.257165	0.129992	0.204833	Positive
G3V7K3	Cp	0.27757	0.13058	0.20553	Positive
B5DEN5	Eef1b2	0.256746	0.130641	0.20553	Positive
Q5FVH2	Pld3	0.263833	0.131627	0.206917	Positive
Q5U211	Snx3	0.255535	0.13253	0.208024	Positive
Q02356	Ampd2	-0.255528	0.132541	0.208024	Negative
F8WFS9	Add2	-0.255127	0.133171	0.208848	Negative
D3ZAP9	Gpd1l	0.254715	0.133819	0.209699	Positive
G3V8G5	Glg1	0.25439	0.134333	0.21024	Positive
P31044	Pebp1	0.254363	0.134376	0.21024	Positive
D4AE68	Gnaq	-0.254245	0.134563	0.210368	Negative
P63055	Pcp4	-0.254072	0.134839	0.210632	Negative
Q9Z2X5	Homer3	-0.253765	0.135327	0.211229	Negative
G3V7Y3	Atp5d	0.253548	0.135672	0.211601	Positive
P06686	Atp1a2	0.253478	0.135784	0.21161	Positive
Q9WV63	Kif2a	-0.253203	0.136223	0.212127	Negative
Q6Q7Y5	Gna13	0.252976	0.136586	0.212526	Positive
B1WC26	Nans	-0.25281	0.136853	0.212776	Negative
P97546	Nptn	0.252432	0.137461	0.2134	Positive
P50399	Gdi2	-0.252427	0.137469	0.2134	Negative
F1M978	Impa1	-0.252309	0.137659	0.213459	Negative
D4A9A3	Cenpv	0.252269	0.137723	0.213459	Positive
G3V7I0	Prdx3	-0.251477	0.139005	0.215279	Negative
A0A0G2K6S9	Myh11	0.251326	0.13925	0.21549	Positive
A0A0A0MXU2	Coro7	-0.250498	0.140601	0.217412	Negative
F8WFM2	Napb	0.249905	0.141576	0.218749	Positive
P42123	Ldhb	0.249597	0.142082	0.21936	Positive
A0A0G2K0B4	Nedd4	0.249493	0.142254	0.219456	Positive
A0A0H2UHJ5	Zfr	0.249065	0.142962	0.220377	Positive
Q6IMX8	Acot2	0.248812	0.143382	0.220853	Positive
M0RBE5	Nrn1	0.252024	0.144143	0.221727	Positive
P20171	Hras	0.248273	0.144279	0.221727	Positive
Q6GMM8	Slc27a1	0.24827	0.144284	0.221727	Positive
O89049	Txnrd1	-0.248167	0.144457	0.221821	Negative
P10760	Ahcy	0.24797	0.144786	0.222155	Positive
F1LNP8	Pvrl1	0.247514	0.145551	0.223155	Positive
Q62703	Rcn2	0.250636	0.146439	0.224344	Positive
Q6P7Q4	Glo1	0.246769	0.146806	0.224733	Positive
P84586	Rbmxrtl	-0.246576	0.147132	0.225024	Negative
Q505J8	Farsa	0.27116	0.147223	0.225024	Positive
F1M853	Rrbp1	0.24613	0.147889	0.225869	Positive
P63012	Rab3a	-0.245997	0.148114	0.226039	Negative
B1WC34	Prkcsh	-0.24525	0.149389	0.227809	Negative
G3V826	Tkt	-0.24516	0.149543	0.22787	Negative
O35179	Sh3gl2	-0.244912	0.149969	0.228343	Negative
D3ZXH7	Alyref	0.244813	0.150138	0.228426	Positive
P07632	Sod1	-0.24444	0.150781	0.229228	Negative
D4A1J6	Ankfy1	-0.247739	0.151316	0.229834	Negative
Q9Z2I7	Svop	-0.247684	0.151411	0.229834	Negative
Q6PDW1	LOC100359593	0.243816	0.151859	0.230272	Positive
Q9Z272	Git1	0.243774	0.151931	0.230272	Positive
A0A0G2JZX5	NA	-0.243693	0.152072	0.230311	Negative
G3V982	Elmo2	0.243102	0.153099	0.23169	Positive
M0RB22	Ptprd	0.246487	0.153461	0.23191	Positive
Q62785	Pdap1	0.246477	0.153479	0.23191	Positive
A0A0G2K0S1	Calcoco1	-0.241475	0.155954	0.235472	Negative
D3ZD09	Cox6b1	-0.2412	0.156439	0.236025	Negative
O35274	Ppp1r9b	0.239512	0.159449	0.240318	Positive
Q9Z2L0	Vdac1	-0.239468	0.159527	0.240318	Negative
D3ZXL9	Kctd4	-0.239328	0.159779	0.240516	Negative
A0A1W2Q6E9	Msn	0.250276	0.160092	0.240804	Positive
D4A7U1	Zyx	-0.245992	0.160804	0.241692	Negative
F1LYI5	RGD1564138	-0.238554	0.161174	0.241875	Negative
Q04940	Nrgn	-0.23854	0.1612	0.241875	Negative
P00388	Por	0.23849	0.16129	0.241875	Positive
Q6AYK6	Cacybp	-0.238223	0.161773	0.242415	Negative
Q6P4Z9	Cops8	-0.238085	0.162024	0.242609	Negative
Q5XIA5	Coasy	0.249088	0.16215	0.242614	Positive
Q64548-2	Rtn1	0.240785	0.163509	0.244463	Positive
F1LY19	Upf1	0.237141	0.163745	0.244498	Positive
Q63065	Pdk1	0.27055	0.163778	0.244498	Positive
Q99JE4	Rasgrf2	0.236576	0.16478	0.24581	Positive
Q6P3V9	Rpl4	0.235955	0.165924	0.24733	Positive
P62845	Rps15	0.23752	0.16947	0.252426	Positive
Q5PQZ9	Ndufc2	0.231943	0.173454	0.258167	Positive
D4A1R8	Cpne1	0.238875	0.173652	0.258268	Positive
Q6AYG3	Prune	0.231673	0.173969	0.258546	Positive
A0A0G2KB58	Cdc42bpb	0.2312	0.174874	0.259698	Positive
F1LPQ9	Akap2	0.230649	0.175932	0.260917	Positive
B1WBY1	Cul1	0.234058	0.175958	0.260917	Positive
D4A3D4	Abhd3	0.236879	0.177383	0.262833	Positive
O08557	Ddah1	-0.229782	0.177607	0.26297	Negative
Q71UF4	Rbbp7	-0.229277	0.17859	0.26408	Negative
M0R735	Syncrip	0.229234	0.178674	0.26408	Positive
Q5XIF6	Tuba4a	-0.229162	0.178812	0.26408	Negative
A0A096MJG7	LOC102554591	-0.229123	0.178889	0.26408	Negative
D4AA63	Ubqln2	-0.228934	0.179258	0.264119	Negative
Q8K4Y5	Lgi1	0.228929	0.179267	0.264119	Positive
B1WC25	Tra2a	-0.247586	0.179314	0.264119	Negative
F1M9N7	Agfg1	0.235748	0.179523	0.264231	Positive
D4ACG7	Cpne6	0.228479	0.180147	0.264953	Positive
A0A0G2JTW1	NA	0.231549	0.180771	0.265674	Positive
D4A249	Mblac2	0.238347	0.181631	0.266742	Positive
Q5XI22	Acat2	0.227073	0.182916	0.268431	Positive
F1LPG3	Pacs1	0.226578	0.183898	0.269672	Positive
Q9ES21	Sacm1l	-0.226388	0.184275	0.270026	Negative
P36972	Aprt	0.226149	0.184752	0.270525	Positive
P32736-2	Opcml	-0.225679	0.185691	0.271699	Negative
Q642E2	LOC100362069	-0.225061	0.186931	0.273312	Negative
A2RUW1	Tollip	0.239232	0.187269	0.273605	Positive
A2RRU1	Gys1	0.231549	0.187624	0.273923	Positive
M0R7U1	Ak5	-0.224487	0.188086	0.274103	Negative
Q5RJY4-2	Dhrs7b	0.238781	0.188126	0.274103	Positive
Q7TP14	Chid1	-0.22445	0.188161	0.274103	Negative
O70196	Prep	0.224042	0.188986	0.275102	Positive
D3ZDJ3	Elmod1	0.22907	0.192526	0.280051	Positive
Q4AEF8	Copg1	0.22219	0.192766	0.28018	Positive
Q6AYU5	Pcbp2	-0.222126	0.192897	0.28018	Negative
Q6AYR6	Hdhd2	0.228277	0.194112	0.281739	Positive
Q924S5	Lonp1	-0.22145	0.194289	0.28179	Negative
P85971	Pgls	0.230069	0.19773	0.286571	Positive
P85968	Pgd	-0.219439	0.198475	0.287442	Negative
B2GV54	Nceh1	0.218924	0.199557	0.288581	Positive
P11517	NA	0.222168	0.199586	0.288581	Positive
A0A0G2JU66	Nploc4	0.218857	0.199698	0.288581	Positive
Q9R085	Usp15	0.217769	0.201999	0.291694	Positive
A0A0G2K2M9	NA	-0.220774	0.202495	0.292198	Negative
P36876	Ppp2r2a	-0.217257	0.203088	0.292842	Negative
F1LQ55	Scp2	0.216753	0.204163	0.294178	Positive
A2VD09	Abi1	0.216475	0.204759	0.294824	Positive
Q5MJ12	Fbxl16	0.216346	0.205036	0.295008	Positive
D4A055-1	Cacnb4	-0.215973	0.205836	0.295945	Negative
F1LPV0	Nars	-0.214456	0.209115	0.300442	Negative
F1LRI5	Gcn1l1	0.217396	0.209662	0.301011	Positive
G3V8C3	Vim	0.214099	0.209894	0.301126	Positive
Q9Z1E1	Flot1	0.213148	0.211973	0.303889	Positive
D3Z900	Marc2	-0.212231	0.213992	0.306562	Negative
Q58FK9	Ccbl2	-0.221992	0.21437	0.306786	Negative
Q03344	Atpif1	0.212021	0.214457	0.306786	Positive
Q6PCT3	Tpd52l2	0.211586	0.215421	0.307944	Positive
D3ZBU7	RGD1310819	-0.21092	0.216902	0.309837	Negative
G3V640	Timm44	0.224217	0.217321	0.310214	Positive
Q56A26	Opalin	-0.220102	0.218397	0.311526	Negative
P61227	Rap2b	-0.209327	0.220474	0.314262	Negative
Q498U4	Sarnp	0.209144	0.220887	0.314626	Positive
P16617	Pgk1	-0.208706	0.221877	0.315809	Negative
P09495	Tpm4	0.211698	0.222149	0.315971	Positive
Q5U3Y8	Btf3	0.22506	0.223498	0.317662	Positive
P31647	Slc6a11	-0.207446	0.224744	0.319203	Negative
Q64057	Aldh7a1	0.207125	0.225479	0.320018	Positive
P81155	Vdac2	0.206563	0.226768	0.321618	Positive
Q3ZBA0	Tecpr1	0.206457	0.227011	0.321734	Positive
Q9JHZ4	Gripap1	-0.206162	0.227691	0.32232	Negative
Q6P6G9	Hnrnpa1	0.206137	0.227749	0.32232	Positive
P17105	Itpka	0.205965	0.228145	0.322327	Positive
F7EPH4	Ppa1	0.205934	0.228217	0.322327	Positive
Q64542-3	Atp2b4	0.205915	0.228262	0.322327	Positive
P68035	Actc1	0.205853	0.228403	0.322327	Positive
D4A8V2	Ccdc177	-0.205612	0.228962	0.322754	Negative
Q9JLA3	Uggt1	-0.205582	0.22903	0.322754	Negative
P49803	Rgs7	0.20523	0.229846	0.323674	Positive
Q5FVM6	Mtmr12	-0.204923	0.230558	0.324447	Negative
F1LSX1	RGD1307929	0.225513	0.230835	0.324607	Positive
Q641Y0	Ddost	0.210361	0.232423	0.326608	Positive
G3V9W0	Cetn2	0.20385	0.233062	0.327275	Positive
A0A0G2JW01	NA	0.203528	0.233817	0.328103	Positive
P60841	Ensa	-0.20333	0.234282	0.328524	Negative
D4A565	Ndufb5	-0.202785	0.235567	0.330093	Negative
D3ZA31	Mtmr2	-0.20256	0.236096	0.330601	Negative
P62909	Rps3	-0.202125	0.237127	0.331811	Negative
Q4QRB4	Tubb3	-0.202036	0.237337	0.33187	Negative
A0A0G2KAM4	NA	-0.201655	0.238242	0.332903	Negative
P11232	Txn	0.200679	0.240568	0.335688	Positive
F1LMC7	Sept7	0.200677	0.240573	0.335688	Positive
D4AEP0	Adss	0.200462	0.241088	0.33617	Positive
D3ZET9	NA	0.19963	0.243088	0.33872	Positive
F1M2K6	Pkp4	0.199348	0.243768	0.339431	Positive
Q6IRJ7	Anxa7	0.199194	0.244141	0.339711	Positive
D3ZI16	Cops6	0.198958	0.24471	0.340264	Positive
Z4YNF4	Acp1	0.201118	0.24666	0.342736	Positive
P62824	Rab3c	-0.196651	0.250337	0.347603	Negative
G3V8U9	Psmb4	0.196106	0.251678	0.349221	Positive
Q7TQ16	Uqcrq	0.196	0.25194	0.34934	Positive
D3ZUX5	Chchd3	-0.195259	0.253772	0.351635	Negative
P35435	Atp5c1	0.194507	0.255642	0.35398	Positive
G3V918	Gart	0.193861	0.257255	0.355965	Positive
F1LXD6	Pitpnm2	0.193424	0.25835	0.357232	Positive
Q6P502	Cct3	0.192973	0.259482	0.358547	Positive
D4AEI5	Myef2	-0.192785	0.259955	0.358952	Negative
P26453-2	Bsg	0.192154	0.26155	0.360903	Positive
A0A0U1RRV7	Srsf3	0.191855	0.262307	0.361696	Positive
M0R3X6	Cbr1	0.19125	0.263843	0.363252	Positive
P43425	Gng7	-0.197087	0.263901	0.363252	Negative
G3V8L9	Ptrf	0.203485	0.263984	0.363252	Positive
P68101	Eif2s1	0.191122	0.264169	0.363255	Positive
Q9WV48-3	Shank1	0.190899	0.264738	0.363786	Positive
B0BN46	Grhpr	0.193511	0.265356	0.363983	Positive
G3V9G4	Acly	0.190649	0.265373	0.363983	Positive
B0BN18	Pfdn2	-0.190627	0.265431	0.363983	Negative
M0RC17	Chl1	0.190436	0.265919	0.3644	Positive
A0A0G2K9A9	Fbxo41	0.192583	0.267701	0.36659	Positive
Q8K3M6	Erc2	0.189273	0.268904	0.367984	Positive
A0A0G2K4A0	NA	-0.188371	0.271234	0.370917	Negative
A0A0G2JZK7	Slc8a2	0.187028	0.274729	0.375438	Positive
M0R9I6	Amt	0.209418	0.275586	0.376351	Positive
D4A772	Dtna	0.186417	0.276329	0.377105	Positive
F1M8A4	Ppfia2	-0.186286	0.276671	0.377313	Negative
D3ZPC4	L1cam	-0.185286	0.279305	0.380645	Negative
G3V8T9	Bax	-0.184997	0.280067	0.381421	Negative
Q6P9V1	Cd81	-0.184634	0.281028	0.382468	Negative
G3V6P2	Dlst	-0.184344	0.281799	0.383254	Negative
O35889	Mllt4	0.184157	0.282296	0.383668	Positive
D3ZCI0	Gk	0.192735	0.282554	0.383755	Positive
P61314	Rpl15	0.183703	0.283506	0.384786	Positive
Q91ZN1	Coro1a	0.183191	0.284872	0.386376	Positive
A0A0H2UHT6	LOC100362298	-0.183042	0.28527	0.386483	Negative
P26431	Slc9a1	0.185736	0.285406	0.386483	Positive
P60711	Actb	0.182944	0.285534	0.386483	Positive
D3ZYX8	Cox7a2l	-0.182728	0.286112	0.387001	Negative
D4A4W6	Slirp	-0.182404	0.286982	0.387914	Negative
Q76EQ0	Srr	0.181876	0.288403	0.38957	Positive
B5DEH2	Erlin2	-0.181594	0.289165	0.390333	Negative
P60881	Snap25	-0.181278	0.290019	0.39122	Negative
F1LRU1	Ilf3	-0.180913	0.291007	0.392287	Negative
P63322	Rala	-0.180638	0.291755	0.393028	Negative
Q63610-2	Tpm3	0.180504	0.292119	0.393202	Positive
Q497B0	Nit2	0.183152	0.29228	0.393202	Positive
P07895	Sod2	0.17994	0.293654	0.394784	Positive
A0A0U1RRS7	Mapk10	0.179154	0.295803	0.397404	Positive
A0A0G2K2P5	Tjp1	0.178754	0.296899	0.398607	Positive
P29066	Arrb1	0.177729	0.299723	0.402127	Positive
P21531	Rpl3	-0.177401	0.300633	0.403075	Negative
A0A096MJ90	Ly6h	-0.177292	0.300933	0.403206	Negative
A0A0G2K5D7	Specc1	-0.176812	0.302264	0.404717	Negative
Q9JJ19	Slc9a3r1	-0.1759	0.304805	0.407517	Negative
G3V6S2	Aco1	0.175881	0.304859	0.407517	Positive
F1M6A8	Akt3	-0.175841	0.304971	0.407517	Negative
G3V6T7	Pdia4	0.178148	0.305893	0.408474	Positive
D4ADU2	Slc7a11	0.177409	0.307934	0.410923	Positive
P23978	Slc6a1	0.173889	0.310457	0.414012	Positive
D3ZBM3	Fech	-0.17374	0.310878	0.414295	Negative
Q4V8E1	Gatad2b	-0.178807	0.311633	0.414975	Negative
P36860	Ralb	0.173412	0.311806	0.414975	Positive
Q1M168	Atcay	0.173327	0.312046	0.415017	Positive
Q9WVE9	Itsn1	0.173099	0.312692	0.415598	Positive
Q68FR6	Eef1g	-0.172865	0.313359	0.416183	Negative
D4ADF5	Pdcd5	0.178111	0.313551	0.416183	Positive
Q5XII9	Mtfr1l	-0.172503	0.314387	0.417014	Negative
A0A0G2K4B0	Gprc5b	0.172014	0.315784	0.418587	Positive
B5DEY8	Snx6	0.171836	0.316292	0.418981	Positive
P61972	Nutf2	-0.173703	0.318313	0.421378	Negative
B1WC33	Cdc42ep4	-0.179063	0.318733	0.421653	Negative
F7EV94	Bckdha	-0.170279	0.320763	0.424056	Negative
G3V7T8	Dlgap3	0.169993	0.321589	0.424865	Positive
A0A0G2JT93	Ctnnb1	0.168349	0.326359	0.430881	Positive
D3ZCZ9	LOC100912599	-0.167668	0.328347	0.43302	Negative
P04797	Gapdh	-0.167645	0.328415	0.43302	Negative
P63249	Pkia	0.174963	0.330121	0.434981	Positive
A0A0G2JVK4	Nln	-0.166536	0.331673	0.436735	Negative
Q9QYW3	Mob4	0.166351	0.332215	0.43716	Positive
P19944	Rplp1	-0.168348	0.333689	0.438808	Negative
G3V6Q6	Gna11	-0.16547	0.334819	0.440003	Negative
A0A140TAH1	Hgs	0.165344	0.335192	0.440203	Positive
O88794	Pnpo	0.165136	0.335809	0.440666	Positive
P25093	Fah	0.165076	0.335989	0.440666	Positive
Q62688	Plcl1	-0.164801	0.336805	0.441446	Negative
E9PU01	Chd4	-0.169073	0.339128	0.444198	Negative
D4A4T9	Chordc1	-0.171282	0.340554	0.445772	Negative
A0A0G2K2B3	Khsrp	-0.163395	0.341	0.446061	Negative
B5DFC8	Eif3c	0.162999	0.342189	0.447322	Positive
D4AC36	Eif3f	-0.167757	0.342956	0.44803	Negative
P97532	Mpst	0.162516	0.34364	0.448628	Positive
F7F350	NA	0.162335	0.344184	0.449043	Positive
G3V9W5	Pip4k2c	0.16678	0.345816	0.450877	Positive
G3V9J7	Rabep1	0.161701	0.346097	0.450947	Positive
Q4FZT0	Stoml2	0.161109	0.347888	0.452984	Positive
P04692-5	Tpm1	-0.160975	0.348296	0.453218	Negative
B2RZD6	Ndufa4	0.160378	0.350109	0.455279	Positive
P62997	Tra2b	0.162624	0.350619	0.455644	Positive
Q3KRE2	Mettl7a	0.170301	0.351404	0.456366	Positive
Q5U1Z2	Trappc3	-0.173082	0.351785	0.456562	Negative
P62982	Rps27a	0.15952	0.352729	0.457488	Positive
P04642	Ldha	0.158968	0.354419	0.459273	Positive
P63159	Hmgb1	-0.158868	0.354726	0.459273	Negative
Q7TQ94-2	Nit1	-0.158844	0.354798	0.459273	Negative
A0A0G2K9Q6	Atp2b3	0.158513	0.355813	0.460287	Positive
F8WFH6	Fam131b	-0.163159	0.356535	0.460921	Negative
D4A1G8	Cep170b	-0.158119	0.357029	0.461259	Negative
Q9QUH6	Syngap1	-0.157703	0.35831	0.46256	Negative
P70580	Pgrmc1	0.157641	0.358502	0.46256	Positive
P05370	G6pdx	0.157562	0.358744	0.462572	Positive
F1LMA4	Adrbk1	-0.157456	0.359074	0.462698	Negative
D3ZPJ0	Shisa7	0.15679	0.361136	0.465053	Positive
Q924S1	Agpat4	0.155635	0.364727	0.469374	Positive
P21533	Rpl6	-0.155232	0.365984	0.470686	Negative
F7F1Y3	Vps4a	-0.155061	0.366521	0.471071	Negative
G3V792	Dync1i1	-0.154866	0.367131	0.471551	Negative
F1LYS1	Rims1	0.154452	0.368429	0.472912	Positive
P62828	Ran	0.154157	0.369355	0.473792	Positive
D4A3N4	Adcy1	-0.156382	0.369661	0.473792	Negative
G3V6I1	Llgl1	-0.154006	0.369829	0.473792	Negative
P04785	P4hb	-0.15385	0.370322	0.474053	Negative
F1M7L6	Scg3	0.161079	0.370511	0.474053	Positive
G3V7W1-2	Pdcd6	0.153633	0.371005	0.47438	Positive
P45592	Cfl1	-0.152713	0.373909	0.477786	Negative
A0A0U1RVI9	Rps2	-0.152595	0.374284	0.477926	Negative
Q9WV97	Timm9	0.15252	0.374521	0.477926	Positive
P52555	Erp29	-0.152451	0.37474	0.477926	Negative
D4A1Q2	Mapt	-0.152093	0.375876	0.479067	Negative
D3ZT36	Adam23	0.151988	0.376211	0.479186	Positive
F1LP01	Dgkb	0.151868	0.37659	0.479224	Positive
B2RZ74	Snrnp70	0.1518	0.376808	0.479224	Positive
D3ZDU5	Pfn2	-0.153922	0.377334	0.479224	Negative
P61983	Ywhag	-0.151609	0.377415	0.479224	Negative
A0A0G2K0W9	Psma7	-0.151599	0.377446	0.479224	Negative
P39069	Ak1	0.150823	0.379923	0.48206	Positive
Q6PDV8	Rpl22	-0.150039	0.382432	0.484934	Negative
O54701	Slc24a2	0.149828	0.383111	0.485486	Positive
Q5M7V8	Thrap3	0.15197	0.383487	0.485652	Positive
Q64232	Tecr	0.148977	0.385849	0.488332	Positive
Q7TQ77	Hook3	-0.15588	0.386355	0.488662	Negative
A0A0G2JTN4	LOC100912917	0.148421	0.387646	0.489983	Positive
P24368	Ppib	0.157565	0.389095	0.491396	Positive
Q7TQ70	Fga	-0.147922	0.389259	0.491396	Negative
A0A0G2K038	Rexo2	-0.152384	0.389596	0.49151	Negative
M0RC65	Cfl2	0.147277	0.391356	0.493416	Positive
C0JPT7	Flna	0.151696	0.391766	0.493621	Positive
P62832	Rpl23	0.148677	0.393995	0.496115	Positive
D3ZZR9	Fkbp2	-0.150882	0.394342	0.496237	Negative
B0BN93	Psmd13	0.14601	0.395487	0.497363	Positive
A0A5H1ZRU5	Necab2	0.145365	0.3976	0.499652	Positive
B2RYQ2	Ppp2r4	-0.145287	0.397857	0.499652	Negative
Q63083	Nucb1	0.145224	0.398062	0.499652	Positive
M0R5H1	Etl4	-0.145114	0.398424	0.499735	Negative
P41499-1	Ptpn11	-0.145051	0.398631	0.499735	Negative
A0A0G2KA27	Madd	-0.144683	0.39984	0.50079	Negative
Q9Z0W5	Pacsin1	-0.144642	0.399977	0.50079	Negative
F1LYG2	Sipa1l3	0.146442	0.401225	0.502036	Positive
Q6AZ33	Blvra	0.143986	0.402138	0.502863	Positive
Q66H61	RGD1562301	0.143548	0.403589	0.50436	Positive
Q3MIE9	Sms	0.143163	0.404863	0.505633	Positive
G3V7X5	Sparcl1	-0.141963	0.408853	0.510295	Negative
D3ZJ01	RGD1307235	0.141832	0.409292	0.510523	Positive
P21913	Sdhb	-0.141547	0.410242	0.511388	Negative
D3ZCL3	Snrpc	-0.141168	0.411511	0.512647	Negative
Q1JU68	Eif3a	-0.140338	0.414291	0.515788	Negative
P28480	Tcp1	0.139655	0.416589	0.518324	Positive
Q5XIT9	Mccc2	0.139049	0.418636	0.520544	Positive
F1LNT0	Dpysl4	0.138306	0.421152	0.523211	Positive
Q4V7C6	Gmps	-0.13826	0.421307	0.523211	Negative
Q6AYQ8	Fahd1	-0.13778	0.422937	0.524907	Negative
D3ZAA9	Mpp2	-0.13725	0.424741	0.526816	Negative
P97612	Faah	0.136815	0.426225	0.528327	Positive
Q5BJT9	Ckmt1b	-0.136512	0.427259	0.529193	Negative
P62747	Rhob	0.136454	0.427456	0.529193	Positive
Q4KLH4	Pspc1	0.135707	0.430014	0.532029	Positive
P14270-1	Pde4d	-0.134907	0.432764	0.534885	Negative
F1M4K6	Lrrc7	0.134879	0.432861	0.534885	Positive
F1LM19	Ahsg	0.134275	0.434942	0.537122	Positive
Q5PPJ9	Sh3glb2	-0.134167	0.435314	0.537247	Negative
D4A0A1	Soga3	0.133891	0.436268	0.537816	Positive
P0C170	Hist1h2ac	-0.133877	0.436316	0.537816	Negative
F1LND7	Fdps	0.132581	0.440812	0.543022	Positive
A0A0G2JY08	Myo18a	0.132207	0.442113	0.544286	Positive
B1WBW4	Armc10	0.132024	0.44275	0.544734	Positive
Q5U362	Anxa4	0.131646	0.444068	0.546017	Positive
F8WFR6	Gyg1	-0.131444	0.444776	0.546549	Negative
F1LRZ7	Nefh	-0.131337	0.445148	0.546668	Negative
B0BN81	Rps5	-0.131045	0.446171	0.547527	Negative
F1M6X3	Kcnq2	0.13721	0.446398	0.547527	Positive
A0A0G2JSR7	Matr3	-0.130506	0.448059	0.549225	Negative
Q9QVC8	Fkbp4	0.130045	0.449679	0.550871	Positive
Q9JHL4-3	Dbnl	-0.128552	0.454941	0.556974	Negative
A0A0G2KAI8	NA	-0.128262	0.455969	0.557888	Negative
D3ZGE6	Cttn	0.127958	0.457047	0.558863	Positive
Q5M821	Ppm1h	0.127833	0.45749	0.559061	Positive
F1LN69	Mink1	-0.127103	0.460083	0.561884	Negative
Q68FY0	Uqcrc1	0.125784	0.464791	0.567285	Positive
P15650	Acadl	0.125253	0.466694	0.569011	Positive
Q9WUD9	Src	0.131128	0.466996	0.569011	Positive
F1LYQ8	Farp1	0.127045	0.467064	0.569011	Positive
D4A4Z9	Ktn1	-0.12499	0.467638	0.569361	Negative
Q5RJL0	Ermn	0.124865	0.468085	0.569556	Positive
Q6AYK8	Eif3d	-0.124727	0.468581	0.569811	Negative
B2DD29	Brsk1	0.123791	0.471953	0.573271	Positive
P18297	Spr	-0.127613	0.472004	0.573271	Negative
D4A4M0	Shisa6	-0.123479	0.473076	0.574223	Negative
F1LMW7	Marcks	0.12316	0.47423	0.575271	Positive
D4A3D9	Stk32c	0.122562	0.476395	0.577267	Positive
Q6J4I0	Ppp1r1b	-0.122545	0.476456	0.577267	Negative
Q6P6T6	Ctsd	0.122388	0.477028	0.577608	Positive
Q5RJR8	Lrrc59	0.122274	0.47744	0.577755	Positive
D4A0X3	Btbd8	0.121339	0.48084	0.581515	Positive
P55067	Ncan	-0.12117	0.481458	0.581908	Negative
Q66X93	Snd1	0.120921	0.482363	0.582304	Positive
P11240	Cox5a	-0.120909	0.482409	0.582304	Negative
P18088	Gad1	-0.128643	0.482876	0.582304	Negative
A0A140TAI3	Hnrnpc	-0.120758	0.482957	0.582304	Negative
Q3KRF2	Hdlbp	-0.120285	0.484687	0.584035	Negative
A0A0H2UHQ8	LOC100364909	-0.120104	0.485348	0.584457	Negative
Q6MFY6	Ppp1r11	0.120029	0.485626	0.584457	Positive
O70257	Stx7	0.121468	0.486994	0.585749	Positive
O35331	Pdxk	-0.119108	0.489004	0.587811	Negative
Q9Z1T4	Cnksr2	-0.117984	0.493142	0.592427	Negative
B1H2A6	Fxr2	0.127534	0.494165	0.593297	Positive
D3ZE72	Metap1	-0.118994	0.495974	0.595109	Negative
A0A0G2K5L2	LOC100911440	0.117061	0.496554	0.595222	Positive
Q8VIL3	Zwint	0.11703	0.496668	0.595222	Positive
Q62888-2	Nlgn2	0.118024	0.49952	0.59828	Positive
P19234	Ndufv2	-0.115828	0.501132	0.599849	Negative
Q3KRD5	Tomm34	-0.115444	0.502561	0.601197	Negative
Q6AYR2	Ndrg3	0.114931	0.504474	0.603122	Positive
F1M787	Ctnnd2	-0.114713	0.505289	0.603734	Negative
B1H2A2	Fsd1	-0.117776	0.507091	0.605523	Negative
O35458	Slc32a1	0.113721	0.509	0.607438	Positive
Q78PB6-2	Ndel1	0.118999	0.509516	0.607689	Positive
G3V6I5	Dnaja3	0.116264	0.512598	0.610997	Positive
G3V940	Coro1b	-0.111697	0.516619	0.615421	Negative
G3V774	Fbxo2	-0.111304	0.518106	0.616696	Negative
F1MA97	Thsd7a	-0.112937	0.51831	0.616696	Negative
P61589	Rhoa	-0.110706	0.520372	0.618778	Negative
F1MA98	Tpr	-0.110601	0.520767	0.618879	Negative
Q8VI04	Asrgl1	-0.110383	0.521596	0.619492	Negative
Q5M9I5	Uqcrh	-0.109523	0.524864	0.623001	Negative
G3V9G3	Camk2b	-0.108918	0.52717	0.625365	Negative
Q6P503	Atp6v1d	-0.108303	0.52952	0.627778	Negative
O70511	Ank3	-0.108092	0.530328	0.628362	Negative
D3ZDK7	Pgp	0.110861	0.532513	0.630234	Positive
P52759	Hrsp12	0.109145	0.532543	0.630234	Positive
F1LU71	Auh	0.107368	0.5331	0.630518	Positive
Q5U302	Ctnna1	0.106974	0.534613	0.631931	Positive
F1M7S3	Pdyn	0.108479	0.535061	0.632084	Positive
Q5XIN6	Letm1	-0.106497	0.536449	0.633347	Negative
M0RBS9	Snx27	-0.107978	0.536959	0.633568	Negative
P19490	Gria1	-0.106283	0.537273	0.633568	Negative
A0A0G2JUG7	NA	-0.105998	0.538371	0.634486	Negative
P62024	Phactr1	0.105668	0.539642	0.635607	Positive
Q68FX3	Ddx19a	-0.104952	0.542409	0.638487	Negative
A0A140UHX6	NA	0.104035	0.545963	0.64229	Positive
D3Z941	Mars	-0.103752	0.547059	0.643199	Negative
A0A0G2K7W6	Rpl27a	-0.102624	0.551448	0.647976	Negative
A0A0H2UHG7	Rps20	-0.102288	0.552758	0.649132	Negative
B1H267	Snx5	0.101884	0.554337	0.650415	Positive
Q6QIX3	Slc30a3	0.103387	0.554506	0.650415	Positive
B2GUV5	Atp6v1g1	0.100876	0.558284	0.654461	Positive
D3ZCI5	Stxbp6	-0.100679	0.559056	0.654848	Negative
A0A0G2JWS2	Nebl	-0.100559	0.559529	0.654848	Negative
Q5RJK5	LOC100360260	0.103632	0.559727	0.654848	Positive
Q5XIC0	Eci2	0.105211	0.56009	0.654848	Positive
Q63259	Ptprn	-0.103492	0.560262	0.654848	Negative
P20156	Vgf	0.100058	0.561497	0.655905	Positive
Q9QX74-2	Shank2	0.0997556	0.562686	0.656907	Positive
P20651	Ppp3cb	0.0992806	0.564556	0.658368	Positive
P68370	Tuba1a	-0.0991802	0.564952	0.658368	Negative
B2RZ37	Reep5	0.0990712	0.565382	0.658368	Positive
Q5XIE6	Hibch	0.0990054	0.565641	0.658368	Positive
P62076	Timm13	0.0989415	0.565893	0.658368	Positive
P67779	Phb	0.0988831	0.566124	0.658368	Positive
Q9ER34	Aco2	-0.0988496	0.566256	0.658368	Negative
Q02563	Sv2a	-0.098745	0.566669	0.658463	Negative
Q4KM65	Nudt21	-0.103256	0.567443	0.658977	Negative
Q06486	Csnk1d	0.0994818	0.56964	0.661142	Positive
G3V6Q3	Wdr13	0.0977903	0.570444	0.661688	Positive
Q99J82	Ilk	-0.0983861	0.57392	0.665331	Negative
Q68FS4-2	Lap3	-0.0955292	0.57943	0.671063	Negative
P07323	Eno2	-0.095502	0.579539	0.671063	Negative
A0A096MIZ1	Palm2	-0.0933252	0.58825	0.680753	Negative
P04764	Eno1	-0.0929576	0.589727	0.682065	Negative
Q6AZ35	Dync1i2	-0.0925157	0.591504	0.683434	Negative
P97685	Nfasc	-0.0924923	0.591599	0.683434	Negative
D3ZMS0	LOC100911713	0.0922278	0.592664	0.684267	Positive
P97608	Oplah	0.0961305	0.594609	0.686113	Positive
P27653	Mthfd1	-0.0913434	0.596231	0.687586	Negative
F1LQ48	Hnrnpl	-0.0910653	0.597355	0.688482	Negative
Q811X6	Cryl1	0.0896569	0.60306	0.694655	Positive
B0BNM1	Apoa1bp	-0.0890391	0.60557	0.697142	Negative
F1LN92	Afg3l2	-0.0876768	0.611119	0.702803	Negative
Q6AXQ0	Sae1	0.0876584	0.611194	0.702803	Positive
M0RC99	Rab5a	0.093246	0.611733	0.703015	Positive
P23565	Ina	-0.0870337	0.613747	0.704922	Negative
A0A0G2JZH8	Pdhx	0.0867961	0.614719	0.70563	Positive
P22734-2	Comt	-0.0867306	0.620314	0.711163	Negative
Q568Z6	Ist1	0.0853977	0.620452	0.711163	Positive
P11530	Dmd	0.0853587	0.620612	0.711163	Positive
P80254	Ddt	0.0844354	0.624411	0.714995	Positive
P15800	Lamb2	-0.084371	0.624676	0.714995	Negative
D4AEK9	Ccdc6	-0.0839868	0.626259	0.716395	Negative
D4A6U1	Adam11	-0.0835518	0.628054	0.718035	Negative
Q6P3V8	Eif4a1	0.0833632	0.628833	0.718511	Positive
D4A746	Gmppb	0.085833	0.629337	0.718674	Positive
D4ADE5	Setd7	0.0823749	0.632921	0.722168	Positive
F1LQL1	Nos1	-0.0835783	0.633124	0.722168	Negative
F7F2F3	NA	0.0817851	0.635366	0.723936	Positive
A0A0G2JUI3	Dlgap2	0.0817044	0.6357	0.723936	Positive
Q6P9V6	Psma5	0.0816305	0.636007	0.723936	Positive
P63164	Snrpn	-0.0816007	0.636131	0.723936	Negative
O35867	Ppp1r9a	-0.0811384	0.63805	0.725705	Negative
O08629	Trim28	0.0810432	0.638446	0.725739	Positive
P21708	Mapk3	-0.0809243	0.63894	0.725886	Negative
F1LT41	Vti1a	-0.0832058	0.639903	0.726564	Negative
Q642B0	Gpc4	0.0802106	0.64191	0.728427	Positive
F1M3D2	Dmwd	0.0857351	0.646534	0.733255	Positive
D4A5J1	Kbtbd11	-0.078921	0.647291	0.733695	Negative
P05708	Hk1	-0.0788279	0.64768	0.733717	Negative
F1M5M9	Srgap3	0.0784373	0.649313	0.735149	Positive
D4A7N1	Chchd6	-0.0768381	0.656018	0.742316	Negative
G3V945	Aldh5a1	0.0759842	0.659609	0.745571	Positive
F1MAA7	Lamc1	0.0771319	0.659645	0.745571	Positive
A0A0G2K0T5	Micu1	-0.0769331	0.66047	0.746079	Negative
O35180	Sh3gl3	-0.0766001	0.661852	0.747216	Negative
P62083	Rps7	-0.0749764	0.663857	0.749053	Negative
D4A6P1	Sez6l2	0.0744166	0.666221	0.751294	Positive
P37361	Mt3	0.0735095	0.670058	0.755193	Positive
Q6AY30	Sccpdh	0.0728814	0.67272	0.757763	Positive
P07825	Syp	0.0727881	0.673116	0.757779	Positive
F1LSY2	Nptxr	0.0725442	0.67415	0.758515	Positive
Q6P747	Hp1bp3	-0.0720425	0.676281	0.760127	Negative
Q5XI64	Abhd6	0.0720266	0.676349	0.760127	Positive
F1LNF0	Myh14	0.0726652	0.678267	0.761835	Positive
Q5U328	Ncl	-0.0714889	0.678635	0.761835	Negative
P60123	Ruvbl1	0.0703783	0.683366	0.766694	Positive
M0RAM5	Gpx1	0.0713621	0.683735	0.766694	Positive
P25409	Gpt	-0.072123	0.685225	0.766755	Negative
P30349	Lta4h	-0.0698723	0.685526	0.766755	Negative
Q8VHK7	Hdgf	-0.0744199	0.685628	0.766755	Negative
F1LPB9	Rph3a	-0.0698458	0.685639	0.766755	Negative
D4AB03	Fam120a	0.0698272	0.685719	0.766755	Positive
P12369	Prkar2b	0.0691357	0.688674	0.769627	Positive
D3ZJ86	Slc9a6	-0.0696415	0.69098	0.771769	Negative
Q63560	Map6	0.0684091	0.691785	0.772234	Positive
F1M403	Ube2o	0.06827	0.692381	0.772466	Positive
A0A0G2JSL0	Psmb6	-0.0680267	0.693424	0.773195	Negative
Q6AYS7	Acy1a	-0.0678537	0.694166	0.773588	Negative
E9PU13	Snx4	0.0676566	0.695011	0.773847	Positive
D4A3I4	Btf3l4	0.0708566	0.695178	0.773847	Positive
Q64361	Lxn	-0.0675386	0.699872	0.778637	Negative
Q04462	Vars	-0.0656821	0.703503	0.782239	Negative
D4ACB8	Cct8	0.0652708	0.705276	0.783772	Positive
Q8CF97	Vcpip1	-0.0646338	0.708026	0.786388	Negative
D3ZSY8	Tbc1d10b	-0.0643101	0.709424	0.787501	Negative
P62912	Rpl32	0.0638358	0.711475	0.789259	Positive
F1LS72	Uba2	0.0646274	0.712246	0.789259	Positive
B1WBS4	Vps26b	0.0636096	0.712454	0.789259	Positive
P09117	Aldoc	-0.0635767	0.712597	0.789259	Negative
D4A2C6	Lsm4	0.0682616	0.715207	0.791708	Positive
Q63610	Tpm3	0.0626943	0.71642	0.792609	Positive
F1LT35	RGD1564606	-0.0620461	0.719232	0.795278	Negative
A0A0G2JWA3	Xpo7	0.0615509	0.721384	0.797213	Positive
F1LMT5	Pex5l	0.0612528	0.722679	0.798201	Positive
A0A0G2K7K2	Aifm1	0.0619422	0.723724	0.798911	Positive
P13668	Stmn1	-0.060797	0.724662	0.799503	Negative
A0A0G2JT30	Mat2b	-0.0605465	0.725753	0.800262	Negative
A0A0G2JUT1	Cadm1	-0.060285	0.726892	0.801073	Negative
P63329	Ppp3ca	-0.0599856	0.728197	0.801679	Negative
A0A0H2UHV9	Copg2	0.0608875	0.728249	0.801679	Positive
Q9WVB1	Rab6a	0.0596348	0.729727	0.802861	Positive
A0A0H2UHF5	Kcnj10	-0.0605662	0.73366	0.806741	Negative
D4A8H3	Uba6	0.0605566	0.737802	0.810848	Positive
Q6MGC4	Pfdn6	0.0583702	0.739085	0.811808	Positive
A0A0G2K2V2	Ap1b1	0.0569053	0.741665	0.814192	Positive
O08838	Amph	-0.0557296	0.746826	0.819405	Negative
D3ZWL6	Ahcyl2	0.0555518	0.747607	0.819619	Positive
A0A140TAB3	Klc1	0.0554975	0.747846	0.819619	Positive
M0R3U3	Ildr2	-0.0550059	0.750008	0.821536	Negative
F1LXQ7	Arhgap21	-0.0548593	0.750653	0.821789	Negative
G3V746	Grin2b	0.0531921	0.758001	0.828937	Positive
Q9QUL6	Nsf	0.0531886	0.758016	0.828937	Positive
Q3ZAU6	Rnf14	0.0530132	0.75879	0.82919	Positive
P14659	Hspa2	0.0529472	0.759082	0.82919	Positive
A2VCX1	Tiprl	-0.0523959	0.761517	0.831205	Negative
Q3B8Q0	Mapre2	-0.0523401	0.761764	0.831205	Negative
B0BNB9	Htra2	0.0537459	0.762739	0.831813	Positive
A0A0G2K8K0	NA	-0.0517485	0.76438	0.832466	Negative
A0A0G2KAW2	Sipa1l1	-0.051634	0.764887	0.832466	Negative
F7FKI5	Pdha1	0.0516172	0.764961	0.832466	Positive
P18422	Psma3	0.0515966	0.765052	0.832466	Positive
G3V7G9	Eif3l	0.0514165	0.765849	0.832466	Positive
A0A140TAI1	Ubqln1	-0.0513329	0.76622	0.832466	Negative
D3ZVR7	Fam213b	-0.0521035	0.766271	0.832466	Negative
G3V644	Ndufv3	-0.0507641	0.768739	0.834691	Negative
P70566	Tmod2	0.0503613	0.770524	0.836172	Positive
P15791-2	Camk2d	0.0498555	0.772768	0.83815	Positive
P23965	Eci1	0.049352	0.775004	0.840116	Positive
G3V984	Bsn	-0.0491705	0.77581	0.840532	Negative
P10111	Ppia	0.0488178	0.777377	0.841475	Positive
A0A0G2K3V4	NA	-0.048784	0.777528	0.841475	Negative
Q9ESH6	Glrx	-0.0470194	0.785383	0.849513	Negative
P24473	Gstk1	0.0476292	0.785853	0.84956	Positive
A0A0G2K490	Tnik	-0.046662	0.786977	0.850311	Negative
O88321	Psmd4	-0.0465142	0.787636	0.850561	Negative
P35815	Ppm1b	-0.0459054	0.790353	0.853032	Negative
M0RBL8	Tceal6	-0.0455734	0.791836	0.854168	Negative
Q5RJN0	Ndufs7	0.0452501	0.793281	0.855263	Positive
Q561S0	Ndufa10	-0.045088	0.794005	0.855579	Negative
Q5PQN0	Ncald	0.0446779	0.795839	0.857091	Positive
D3ZI07	Kif3b	0.0443345	0.797376	0.85828	Positive
P17425	Hmgcs1	0.0454922	0.798358	0.858872	Positive
Q5M7A4	Uba5	-0.0438893	0.799369	0.859494	Negative
P09606	Glul	-0.0436161	0.800592	0.860344	Negative
P62914	Rpl11	-0.0430857	0.802969	0.862065	Negative
Q4G079	Aimp1	0.0430652	0.803061	0.862065	Positive
Q00566-2	Mecp2	0.0428461	0.804043	0.862631	Positive
Q6PCU2	Atp6v1e1	-0.042754	0.804456	0.862631	Negative
A0A096MKG5	Nadk2	-0.0454189	0.805037	0.862648	Negative
P11348	Qdpr	-0.0425569	0.80534	0.862648	Negative
A0A0G2JU49	Mtx1	0.0420671	0.807539	0.864536	Positive
D4A9L2	Srsf1	-0.041614	0.809573	0.865997	Negative
B2RYP4	Snx2	-0.0415691	0.809775	0.865997	Negative
B0BNJ1	Sri	-0.0414216	0.810438	0.86624	Negative
P11507-2	Atp2a2	0.041235	0.811276	0.86667	Positive
Q5HZW3	Asphd2	0.0408353	0.813073	0.868122	Positive
F1LQI4	Acan	-0.0406098	0.814087	0.868739	Negative
Q9Z270	Vapa	-0.0397792	0.817825	0.872259	Negative
A0A0G2K6T9	NA	0.0396396	0.818454	0.872461	Positive
D4A053	Shroom2	0.039871	0.82011	0.873758	Positive
Q63413	Ddx39b	-0.0388369	0.822071	0.875377	Negative
Q4QQV4	Hars	0.038357	0.824235	0.877212	Positive
B2RZ79	Iscu	0.040477	0.825908	0.878412	Positive
B3DMA1	Atxn2l	-0.0384895	0.826246	0.878412	Negative
D3ZX38	Pfdn1	-0.0377067	0.827169	0.878923	Negative
D3ZZZ9	Ctnnd1	0.0376039	0.830185	0.881656	Positive
M0RDX2	Aplp2	0.0397094	0.832037	0.88315	Positive
G3V6D3	Atp5b	-0.03648	0.832711	0.883394	Negative
D3ZFB6	Prrt2	-0.036218	0.833896	0.884179	Negative
Q9QYU4	Crym	-0.035956	0.835081	0.884963	Negative
G3V9P0	Psmd9	-0.0357511	0.836008	0.885323	Negative
F1LPS8	Pura	-0.035684	0.836312	0.885323	Negative
O88954	Mpp3	-0.0351454	0.83875	0.887114	Negative
D4A0E8	Prmt5	0.035113	0.838896	0.887114	Positive
P49911	Anp32a	-0.0346591	0.840952	0.888815	Negative
Q6AY21	G3bp2	-0.0345601	0.841401	0.888816	Negative
P50554	Abat	0.0337448	0.845096	0.891957	Positive
P09527	Rab7a	0.033706	0.845272	0.891957	Positive
Q3B8Q2	Eif4a3	-0.033218	0.847486	0.893819	Negative
D3ZZ21	Ndufb6	0.0330063	0.848447	0.894357	Positive
B0BNE6	Ndufs8	-0.0328116	0.84933	0.89456	Negative
G3V624	Coro1c	-0.0327655	0.84954	0.89456	Negative
Q3B7V5	Rab2b	-0.0326561	0.850036	0.894609	Negative
F1MAQ5	Map2	-0.0338184	0.85179	0.895981	Negative
Q9JHW0	Psmb7	-0.0312557	0.856399	0.900352	Negative
D3ZQD3	Ogdhl	0.0307645	0.858633	0.902223	Positive
P61150-2	Fgf12	0.0310193	0.861749	0.905019	Positive
P12368	Prkar2a	-0.0297902	0.863067	0.905924	Negative
P19468	Gclc	-0.0300689	0.863856	0.906196	Negative
F1LPV8	Suclg2	-0.0314702	0.864238	0.906196	Negative
A0A0G2JWK6	NA	0.0287815	0.867662	0.908594	Positive
Q9Z0U4-2	Gabbr1	-0.0286931	0.868065	0.908594	Negative
P09895	Rpl5	-0.0286782	0.868133	0.908594	Negative
G3V7V9	Lcmt1	0.0286297	0.868354	0.908594	Positive
Q3B8N9	Bphl	-0.0284009	0.869397	0.90914	Negative
A0A0G2K2S2	Slc2a1	0.0282639	0.870022	0.90914	Positive
A0A0G2K8R3	NA	-0.0285429	0.870706	0.90914	Negative
D3ZJR1	Eps15l1	0.0281138	0.870706	0.90914	Positive
A0A0G2K904	NA	-0.0274677	0.875537	0.913704	Negative
P13234	Camk4	0.0268808	0.876332	0.914053	Positive
F1LPD6	Acaa1b	-0.0267518	0.876921	0.914188	Negative
P62804	Hist1h4b	0.025583	0.88226	0.919272	Positive
D4AB01	Hint2	-0.0252768	0.88366	0.919905	Negative
F1LQ26	Rapgef4	-0.0283845	0.883794	0.919905	Negative
D3ZY47	RGD1559896	-0.0251252	0.884353	0.920005	Negative
F1LT49	Lrrc47	-0.0247997	0.885841	0.921055	Negative
Q8R424	Stambp	0.0247017	0.886289	0.921055	Positive
A0A0G2K7P9	Ncam2	-0.0243415	0.887937	0.922213	Negative
D4AC23	Cct7	0.024255	0.888332	0.922213	Positive
B0BN83	Armc1	0.0233772	0.89235	0.925521	Positive
P05065	Aldoa	-0.0233212	0.892606	0.925521	Negative
F1M863	Ppfia4	0.0232536	0.892916	0.925521	Positive
D3ZDR2	Chmp6	-0.0228198	0.896473	0.928724	Negative
Q6MG60	Ddah2	-0.0219225	0.899013	0.930748	Negative
D3ZSZ6	Dgkh	0.021846	0.899364	0.930748	Positive
Q641Z6	Ehd1	0.0208034	0.904144	0.933591	Positive
D4A831	Adgrb3	0.0214344	0.904228	0.933591	Positive
A0A0G2K4U4	Cacnb1	-0.0210556	0.904439	0.933591	Negative
Q99N27	Snx1	-0.0207325	0.904469	0.933591	Negative
E9PSK7	Mapk8ip3	0.0206649	0.904779	0.933591	Positive
G3V7I8	Slk	-0.0205555	0.905281	0.933591	Negative
A0A0G2K0S7	NA	0.0205297	0.9054	0.933591	Positive
F1LR18	Arhgap39	-0.0198171	0.908669	0.936476	Negative
P12007	Ivd	-0.0189935	0.91245	0.939885	Negative
M0R3K6	Fam107a	0.0187746	0.913455	0.940433	Positive
D4A054	Ranbp2	-0.0186349	0.914097	0.940606	Negative
Q9JLU4-2	Shank3	0.018513	0.914657	0.940695	Positive
P48500	Tpi1	0.0183969	0.91519	0.940757	Positive
G3V6H9	Nap1l1	0.0180006	0.91701	0.94214	Positive
M3ZCQ2	Snrnp200	0.0174801	0.92061	0.944909	Positive
D4A9L5	Epb41l1	-0.0172074	0.920656	0.944909	Negative
A0JN30	Cnpy2	0.0170656	0.921307	0.945089	Positive
O35413	Sorbs2	0.0168184	0.922444	0.945767	Positive
B2GUZ5	Capza1	0.0162106	0.925239	0.948143	Positive
A0A140TAA1	NA	-0.0153846	0.929038	0.951546	Negative
B5DFE0	Mpp6	-0.0152609	0.929607	0.951638	Negative
F1M820	Sorbs1	-0.0140744	0.935068	0.956735	Negative
Q66HF1	Ndufs1	0.0137749	0.936447	0.957653	Positive
M0R7F3	Wasf3	-0.013039	0.939836	0.960624	Negative
F1LQD2	Camkk1	-0.0129205	0.940382	0.960688	Negative
D3ZP47	Phpt1	-0.0127942	0.940963	0.960788	Negative
A0A0G2K9C5	Numbl	-0.0121386	0.943984	0.963175	Negative
F1LPG9	Fam21c	0.0124537	0.94427	0.963175	Positive
A0A0G2JZS1	Kpna6	0.0123339	0.944806	0.963227	Positive
G3V6P8	Gng12	0.0117844	0.945616	0.963411	Positive
M0R776	Mrps36	-0.0117106	0.945956	0.963411	Negative
P07340	Atp1b1	-0.0114141	0.947323	0.964228	Negative
B0K008	Eif1	0.0118696	0.947729	0.964228	Positive
O55173	Pdpk1	-0.011137	0.9486	0.96462	Negative
B0BNL2	LOC364561	0.0105649	0.951237	0.96676	Positive
B0BNJ4	Ethe1	-0.0106292	0.951677	0.96676	Negative
D3ZDB9	Nmral1	0.0102941	0.952485	0.967086	Positive
Q6MG06	Gnl1	-0.00990506	0.955663	0.969156	Negative
Q64537	Capns1	0.00954499	0.955939	0.969156	Positive
A0A0G2K7J0	Acsbg1	0.00950425	0.956127	0.969156	Positive
P63102	Ywhaz	0.00942886	0.956475	0.969156	Positive
B1WC61	Acad9	0.00919623	0.957548	0.969749	Positive
P63047	Sult4a1	0.00905959	0.958178	0.969893	Positive
P63245	Gnb2l1	0.00895378	0.959287	0.969894	Positive
F1LMD9	Gak	-0.00881578	0.959303	0.969894	Negative
A0A0G2K9N0	Smap2	-0.00887539	0.959643	0.969894	Negative
F1M953	Hspa9	0.00824548	0.961933	0.971714	Positive
D3ZUP5	Brk1	-0.00769477	0.964474	0.973786	Negative
A0A0G2JSQ1	Sncb	-0.00698716	0.967739	0.976586	Negative
A0A1B0GWU2	Elavl2	0.0071423	0.968533	0.976792	Positive
F1M0J7	Prickle2	0.00672002	0.968972	0.976792	Positive
D4A4F9	LOC682489	0.00730997	0.969419	0.976792	Positive
Q920Q0	Palm	0.00644065	0.970261	0.977146	Positive
A0A0G2K1L5	Reep2	-0.00583658	0.97305	0.979458	Negative
D3ZAF6	Atp5j2	0.00476308	0.978005	0.983947	Positive
Q5U2N2	Usp14	-0.00412147	0.980967	0.986152	Negative
F1LS86	Iars	-0.00413559	0.981189	0.986152	Negative
P12839	Nefm	-0.00380697	0.982419	0.986889	Negative
Q80Z29	Nampt	-0.00340565	0.984273	0.988251	Negative
P13803	Etfa	-0.00313646	0.985515	0.989	Negative
F1M964	Pmpca	0.00271417	0.987654	0.990645	Positive
P50408	Atp6v1f	0.00255527	0.988199	0.990692	Positive
P55053	Fabp5	0.00239156	0.988955	0.99095	Positive
B0K017	Adprhl2	-0.00162523	0.992838	0.994339	Negative
F1M9B5	Atp2c1	0.00091054	0.995858	0.996861	Positive
D3ZA93	Acot13	0.000810056	0.996372	0.996874	Positive
Q71TY3	Rps27	0.000632715	0.997078	0.997078	Positive

## Sheet: sheet_3
protein_id	gene_symbol	cor	p	fdr	cor_sign
P04182	Oat	0.807015	2.76779e-09	5.49959e-06	Positive
D4A6C5	Arhgap1	0.789537	1.04517e-08	1.03838e-05	Positive
P14604	Echs1	0.772703	3.35801e-08	1.48085e-05	Positive
P10860	Glud1	0.772022	3.513e-08	1.48085e-05	Positive
A0A0G2JZD1	NA	0.771129	3.72634e-08	1.48085e-05	Positive
D4A830	Ppa2	0.766585	5.00972e-08	1.54892e-05	Positive
O08618	Prpsap2	0.765254	5.45667e-08	1.54892e-05	Positive
D3ZWX4	Nckipsd	0.756407	9.4963e-08	2.35864e-05	Positive
Q63622	Dlg2	0.752184	1.22713e-07	2.70924e-05	Positive
Q2TA68	Opa1	0.742614	2.15409e-07	4.28017e-05	Positive
G3V928	Lrp1	0.740717	2.4014e-07	4.33781e-05	Positive
D3ZQ02	Wdr37	0.728314	4.77861e-07	7.91259e-05	Positive
Q64605-2	Ptprs	0.710519	1.20501e-06	0.000184182	Positive
A0A0G2JZH8	Pdhx	0.706232	1.49062e-06	0.000211561	Positive
P41243	Matk	0.709293	1.84296e-06	0.000243661	Positive
A0A0G2K0X4	Rac1	-0.70058	1.96204e-06	0.000243661	Negative
Q91Y81	Sept2	0.695727	2.47194e-06	0.000288926	Positive
G3V6L8	Strn	0.690501	3.15432e-06	0.00033422	Positive
B2GV79	Pdxp	0.690218	3.19586e-06	0.00033422	Positive
F1LPG3	Pacs1	0.687918	3.55179e-06	0.00035287	Positive
G3V8P7	Rin1	0.68649	3.79065e-06	0.000358668	Positive
P05426	Rpl7	0.679808	5.11577e-06	0.000442132	Positive
P34058	Hsp90ab1	0.679799	5.11778e-06	0.000442132	Positive
A1L1J8	Rab5b	0.676028	6.04088e-06	0.00048115	Positive
P35565	Canx	-0.675979	6.05372e-06	0.00048115	Negative
G3V7G0	Dync1li1	0.674128	6.56117e-06	0.000501425	Positive
P10687	Plcb1	0.672602	7.00836e-06	0.000515763	Positive
Q91Z79	Ppfia3	0.670182	7.77515e-06	0.000551758	Positive
P86182	Ccdc22	0.669093	8.14414e-06	0.000558014	Positive
A0A0G2K261	Iars2	0.667336	8.77404e-06	0.000581134	Positive
P46462	Vcp	0.663984	1.00998e-05	0.000647365	Positive
O35303	Dnm1l	0.661699	1.11052e-05	0.000671987	Positive
P31421	Grm2	0.660736	1.15558e-05	0.000671987	Positive
Q6IN39	Hsd17b4	0.660208	1.181e-05	0.000671987	Positive
A0A0G2JXA8	Flot2	0.660153	1.18367e-05	0.000671987	Positive
A0A0G2K9L2	NA	0.657874	1.29944e-05	0.000717218	Positive
D4A1V5	Kif21a	0.656476	1.37553e-05	0.000738699	Positive
P20070-3	Cyb5r3	0.654926	1.46456e-05	0.000765811	Positive
Q9QZA2	Pdcd6ip	0.653136	1.57385e-05	0.000776099	Positive
F1LYA6	Abi2	0.652521	1.61313e-05	0.000776099	Positive
M0R9L2	Cntfr	0.667217	1.63461e-05	0.000776099	Positive
O35112	Alcam	0.6521	1.64047e-05	0.000776099	Positive
D4A3V2	Ndufa6	0.63984	2.64836e-05	0.00122379	Positive
P42123	Ldhb	0.637014	2.94889e-05	0.00133169	Positive
P63326	Rps10	0.635033	3.17753e-05	0.00140306	Positive
F1LRI7	Aak1	0.632284	3.52152e-05	0.00152114	Positive
Q6IN22	Ctsb	0.630576	3.75188e-05	0.001575	Positive
D3ZMS0	LOC100911713	-0.645122	3.80472e-05	0.001575	Negative
Q5XIH7	Phb2	0.629168	3.95203e-05	0.00160259	Positive
A0A1W2Q6Q2	Dclk1	0.626488	4.35978e-05	0.00173257	Positive
D4ABM3	Daam1	0.624861	4.62541e-05	0.00179229	Positive
A0A0G2KB58	Cdc42bpb	0.624476	4.69044e-05	0.00179229	Positive
A0A0G2K401	Pcca	0.623736	4.81771e-05	0.00180619	Positive
M0R8B6	Tubb1	0.63024	4.96021e-05	0.00182517	Positive
Q5RJR9	Serpinh1	0.620385	5.43385e-05	0.0019631	Positive
P63174	Rpl38	0.616396	6.25961e-05	0.00219887	Positive
Q5I0D1	Glod4	0.616178	6.30779e-05	0.00219887	Positive
A0A0G2JTL5	Pc	0.615349	6.49431e-05	0.00220142	Positive
Q6PW34	Nrcam	0.614982	6.57849e-05	0.00220142	Positive
A0A0G2JX74	Mtor	0.614541	6.68083e-05	0.00220142	Positive
Q63569	Psmc3	0.614212	6.75825e-05	0.00220142	Positive
Q5M7U6	Actr2	0.612334	7.2153e-05	0.0022787	Positive
F1M4A4	Kif1a	0.612296	7.22488e-05	0.0022787	Positive
D3ZMY7	Nt5c2	0.61063	7.65394e-05	0.00234725	Positive
Q5BK63	Ndufa9	0.610406	7.71336e-05	0.00234725	Positive
Q8R431	Mgll	0.610095	7.7966e-05	0.00234725	Positive
Q5XIT9	Mccc2	0.608791	8.1543e-05	0.00241826	Positive
Q80W89	Ndufa11	0.607981	8.38391e-05	0.00241826	Positive
F1M9N9	Ank2	0.607917	8.4024e-05	0.00241826	Positive
Q64361	Lxn	-0.607513	8.51929e-05	0.00241826	Negative
Q2PQA9	Kif5b	0.604847	9.32813e-05	0.00258674	Positive
D4A8L9	Btbd17	0.604705	9.37319e-05	0.00258674	Positive
A0A0G2K0V4	Arhgef2	0.603925	9.6238e-05	0.0025959	Positive
Q99PD4	Arpc1a	0.60379	9.66769e-05	0.0025959	Positive
F1MAQ4	Trappc10	0.602015	0.000102627	0.00271893	Positive
G3V8G5	Glg1	0.600189	0.000109093	0.00285221	Positive
Q6NYB7	Rab1A	0.598465	0.000115528	0.00294948	Positive
P97710	Sirpa	0.598285	0.000116221	0.00294948	Positive
P13084	Npm1	0.598015	0.000117267	0.00294948	Positive
A0A0G2JXP3	Nedd4l	0.597053	0.000121054	0.00300668	Positive
D3ZDH8	Sept5	0.59661	0.000122836	0.00301328	Positive
D4AEH9	Agl	0.595981	0.000125408	0.00303886	Positive
B2RYS8	Ndufb8	0.595062	0.000129251	0.00305187	Positive
B4F7A3	Lgalsl	0.595038	0.000129351	0.00305187	Positive
A0A0G2QC41	Hdac6	0.594756	0.000130553	0.00305187	Positive
Q66HF3	Etfdh	0.593846	0.000134494	0.00310743	Positive
Q3MHS9	Cct6a	0.592173	0.000142025	0.00323145	Positive
D4A5I9	Myo6	0.591495	0.000145185	0.00323145	Positive
Q5M7A4	Uba5	0.591332	0.000145952	0.00323145	Positive
A0A0G2K642	Acaa2	0.590788	0.000148545	0.00323145	Positive
F1LNT0	Dpysl4	0.590754	0.00014871	0.00323145	Positive
P29066	Arrb1	0.590311	0.000150851	0.00323145	Positive
A0A0G2JSV0	Ndrg2	0.59023	0.000151245	0.00323145	Positive
M0R7F3	Wasf3	0.603255	0.00015907	0.00336248	Positive
G3V9Y1	Myh10	0.587643	0.000164355	0.00343762	Positive
Q5RJY4-2	Dhrs7b	0.60914	0.000168449	0.00348654	Positive
Q5FVI6	Atp6v1c1	0.583181	0.000189383	0.00387941	Positive
A0A0G2K0B4	Nedd4	0.581129	0.000202001	0.00408851	Positive
D3ZLK9	Carkd	0.580861	0.000203705	0.00408851	Positive
Q01986	Map2k1	0.580421	0.000206523	0.00409444	Positive
D3ZDR2	Chmp6	-0.59444	0.000209656	0.00409444	Negative
P11505-4	Atp2b1	0.579859	0.000210183	0.00409444	Positive
P17220	Psma2	0.579507	0.000212503	0.00409944	Positive
Q68FX0	Idh3B	0.578301	0.000220625	0.00421521	Positive
O88767	Park7	0.577768	0.0002243	0.00424462	Positive
Q68FT7	Farsb	0.576567	0.000232785	0.00436363	Positive
D3ZB78	RGD1559864	0.574346	0.000249247	0.00462855	Positive
F1LUA1	Eea1	0.572854	0.000260874	0.0047996	Positive
D3ZVQ0	Usp5	0.572117	0.000266799	0.00486358	Positive
Q75Q39	Tomm70a	0.570902	0.000276827	0.00500051	Positive
A0A0G2JVH4	Immt	0.57003	0.00028423	0.00504463	Positive
D3ZES7	Plxna4a	0.570017	0.000284348	0.00504463	Positive
F1LNP8	Pvrl1	0.569574	0.00028817	0.00506721	Positive
P54311	Gnb1	0.568849	0.00029454	0.00508738	Positive
P62138	Ppp1ca	0.568802	0.000294962	0.00508738	Positive
Q4V7D4	Fam126b	0.568573	0.000296998	0.00508738	Positive
F1M949	Ckap5	0.568275	0.000299671	0.00508928	Positive
P60892	Prps1	0.567823	0.000303771	0.00511519	Positive
P69897	Tubb5	-0.567324	0.00030835	0.00514866	Negative
D3ZAP9	Gpd1l	0.567032	0.000311057	0.00515059	Positive
B0BMY7	Twf2	0.566202	0.000318871	0.00523633	Positive
M0RAX4	Gnb5	0.564301	0.00033743	0.00549568	Positive
Q5RJZ6	Scoc	0.577456	0.000349156	0.00564042	Positive
F1MAA3	LOC100909464	0.561639	0.000365046	0.00580889	Positive
F1LPS8	Pura	0.561604	0.000365431	0.00580889	Positive
P17764	Acat1	0.55971	0.000386306	0.00604113	Positive
Q6BBI8	Ufc1	0.559484	0.000388864	0.00604113	Positive
Q6P6R2	Dld	0.559458	0.000389162	0.00604113	Positive
D3ZAN3	Ganab	0.558541	0.000399711	0.00611097	Positive
G3V6P7	LOC100911597	0.558533	0.000399812	0.00611097	Positive
D3ZYH3	LOC100912928	0.558056	0.000405405	0.00614916	Positive
Q5XI78	Ogdh	0.557608	0.000410716	0.00618252	Positive
P35571	Gpd2	0.557226	0.000415295	0.00620445	Positive
Q6AYT7	Abhd12	0.554887	0.00044435	0.00658898	Positive
Q68FT1	Coq9	0.552645	0.000473884	0.00697487	Positive
F1LTE0	Tanc2	0.558933	0.000482956	0.00705613	Positive
Q4V8C7	Prkra	0.57312	0.000490068	0.00710777	Positive
P47875	Csrp1	0.557759	0.000499272	0.00718879	Positive
B0BNK1	Rab5c	0.55005	0.000510249	0.00729398	Positive
Q6AZ33	Blvra	0.549171	0.000523117	0.00742452	Positive
F1M3W5	Dmxl2	0.548838	0.000528055	0.00744145	Positive
F1LMH0	Sept3	0.548556	0.000532277	0.00744812	Positive
A0A0G2JWA8	Macf1	0.548296	0.000536203	0.0074506	Positive
Q62844	Fyn	0.554828	0.000542157	0.00748101	Positive
Q5HZA6-2	Prepl	0.547463	0.000548933	0.00750515	Positive
Q5D023	Dync1li2	0.547054	0.00055529	0.00750515	Positive
P62275	Rps29	-0.560916	0.000558966	0.00750515	Negative
F7EN52	Cyp46a1	0.546816	0.000559015	0.00750515	Positive
F1LQJ7	Pck2	0.544917	0.000589537	0.00786182	Positive
F1LM09	Usp7	0.542472	0.000631024	0.00835896	Positive
Q68A21	Purb	0.542026	0.00063888	0.00840699	Positive
A0A0A0MY09	Hsp90b1	0.541049	0.000656348	0.00858002	Positive
Q5M7V8	Thrap3	0.540425	0.000667733	0.00867181	Positive
P29266	Hibadh	0.54003	0.000675036	0.00867554	Positive
D3ZML2-2	Brsk2	0.539937	0.000676753	0.00867554	Positive
Q9QZR6	Sept9	0.539254	0.000689572	0.00878321	Positive
Q9JHU0	Dpysl5	0.538779	0.000698617	0.00884173	Positive
P50411	Ppp1r2	0.53731	0.000727228	0.00914559	Positive
Q66WT9	Picalm	0.537015	0.000733107	0.00916153	Positive
P09216	Prkce	0.536052	0.000752551	0.00934574	Positive
M0R9X8	Dync1h1	0.535658	0.000760656	0.00934744	Positive
D3ZA84	Tln2	0.535382	0.000766365	0.00934744	Positive
D3ZZK3	Epha4	0.535228	0.000769569	0.00934744	Positive
P23965	Eci1	0.535135	0.000771505	0.00934744	Positive
A0A0H2UHE5	Ppm1a	-0.534717	0.000780296	0.00939666	Negative
G3V8A5	Vps35	0.534256	0.00079006	0.00945692	Positive
Q6P7B0	Wars	0.533682	0.000802394	0.00949993	Positive
D4A601	Taco1	0.570584	0.000803215	0.00949993	Positive
Q5XIM9	Cct2	0.532753	0.000822729	0.00967315	Positive
D3ZI07	Kif3b	0.531972	0.000840171	0.00973073	Positive
Q5RKI0	Wdr1	0.531958	0.00084048	0.00973073	Positive
G3V8L3	Lmna	0.53161	0.000848353	0.00973073	Positive
F1LY09	Actr3b	0.531475	0.000851441	0.00973073	Positive
Q5U1Z9	Mtx2	0.531445	0.000852112	0.00973073	Positive
P20059	Hpx	0.53123	0.00085704	0.00973108	Positive
Q8VIJ5	Mgea5	0.530909	0.000864431	0.00975923	Positive
P30349	Lta4h	0.528558	0.000920283	0.0103311	Positive
Q4FZT9	Psmd2	0.528216	0.000928681	0.0103668	Positive
Q6AYN4	Phyhipl	0.526728	0.000965966	0.0106958	Positive
A0A0G2JW28	Add3	0.526612	0.000968916	0.0106958	Positive
O35264	Pafah1b2	0.526376	0.000974966	0.0107031	Positive
B4F7C7	Hebp1	0.525912	0.000986952	0.0107751	Positive
Q66HA8	Hsph1	0.525059	0.00100936	0.0109596	Positive
G3V644	Ndufv3	0.52445	0.00102561	0.0110754	Positive
D4A8U7	Dctn1	0.524147	0.00103377	0.0111033	Positive
Q6S3A5	Plec	0.523165	0.00106066	0.0112809	Positive
A0A0H2UHQ3	Map1s	0.523121	0.00106188	0.0112809	Positive
Q5XHX3	Enah	0.522924	0.00106734	0.0112809	Positive
A0A0G2K6H2	Gstz1	0.536261	0.00107879	0.0113416	Positive
F1LQI1	Hagh	0.522216	0.00108724	0.0113703	Positive
Q6AY56	Tuba8	-0.52858	0.0010978	0.0114206	Negative
A1L1L6	Rhot1	0.521435	0.00110953	0.0114824	Positive
D3ZPR0	Cse1l	0.520923	0.00112438	0.0115759	Positive
Q6AXV4	Samm50	0.520374	0.00114048	0.0116811	Positive
A0A0H2UHG3	Cul5	0.5257	0.00118209	0.0119866	Positive
F1M542	Adam22	0.518897	0.00118484	0.0119866	Positive
F1LYZ8	Ppp1r21	0.518609	0.00119365	0.0119866	Positive
A0A0G2JZM8	Clasp2	0.518583	0.00119443	0.0119866	Positive
A0A0H2UHJ5	Zfr	0.524399	0.00122201	0.0121508	Positive
P13803	Etfa	0.517663	0.00122303	0.0121508	Positive
P60203	Plp1	-0.517364	0.00123247	0.0121836	Negative
Q8CF97	Vcpip1	0.517031	0.00124302	0.0122254	Positive
M0RD40	Sik3	0.516844	0.001249	0.0122254	Positive
Q6IMZ3	Anxa6	0.516109	0.0012727	0.0123964	Positive
F1LPT4	Camkk2	0.515278	0.00129997	0.0126002	Positive
Q62636	Rap1b	0.514588	0.00132302	0.0127153	Positive
A0A0G2JYF0	Slc4a10	0.514539	0.00132464	0.0127153	Positive
P53042	Ppp5c	0.513505	0.00135991	0.012991	Positive
A0A0G2JV93	Grm3	0.526898	0.00136709	0.0129972	Positive
P61314	Rpl15	0.512589	0.00139181	0.0131183	Positive
D4A9D8	Osbp	0.512554	0.00139304	0.0131183	Positive
G3V6W6	Psmc6	0.512317	0.00140138	0.0131347	Positive
D3ZLT1	Ndufb7	0.512014	0.00141214	0.0131733	Positive
P80254	Ddt	-0.511319	0.00143713	0.0133438	Negative
A0A0G2K2V2	Ap1b1	0.511112	0.00144462	0.013351	Positive
P68035	Actc1	0.510563	0.00146472	0.013474	Positive
A0A0G2K2L8	Cask	0.510248	0.00147635	0.0135185	Positive
Q63570	Psmc4	0.508959	0.00152479	0.013898	Positive
Q5PPJ6	Lars	0.507899	0.00156567	0.014162	Positive
F7F350	NA	0.521352	0.00156801	0.014162	Positive
D3ZHX3	Diras2	0.507211	0.00159274	0.0143202	Positive
P04762	Cat	0.505514	0.00166122	0.0148452	Positive
O08839-2	Bin1	0.505216	0.00167351	0.0148452	Positive
Q5U362	Anxa4	0.505215	0.00167354	0.0148452	Positive
A0A0G2JVL6	NA	0.504906	0.00168637	0.0148925	Positive
B5DFC8	Eif3c	0.504526	0.00170225	0.0149662	Positive
Q6AYE2	Sh3glb1	-0.508737	0.00180428	0.0157934	Negative
Q6DGF2	Clint1	0.500772	0.0018665	0.0162664	Positive
Q62747-2	Syt7	0.536175	0.00187669	0.0162838	Positive
Q6P799	Sars	0.50036	0.00188534	0.0162877	Positive
D4A2C6	Lsm4	0.520109	0.00191887	0.0164738	Positive
A0A140TAB4	H2afy	0.499537	0.00192346	0.0164738	Positive
P62193	Psmc1	0.497847	0.00200388	0.0170889	Positive
P36860	Ralb	0.497485	0.00202153	0.0171643	Positive
D3ZEI4	Hepacam	0.497311	0.00203	0.0171643	Positive
M0RAE4	Ubxn6	0.496467	0.00207177	0.0174432	Positive
P08050	Gja1	0.495446	0.00212326	0.0177464	Positive
A0A0G2JSZ5	Pdia6	0.495399	0.00212564	0.0177464	Positive
F7FG31	Ctbp1	0.494927	0.00214985	0.0178735	Positive
A0A0G2K1C0	Actr3	0.494665	0.00216337	0.0179109	Positive
Q5XIC6	Psmd12	0.494024	0.0021968	0.0181054	Positive
P11980	Pkm	0.493867	0.00220508	0.0181054	Positive
D3ZE15	LOC100911483	-0.493042	0.00224892	0.0183893	Negative
A0A0H2UI35	Homer1	0.492465	0.00228006	0.0185675	Positive
Q68FR6	Eef1g	-0.491865	0.00231279	0.0187572	Negative
Q5U1Z0	Rab3gap2	0.491218	0.00234858	0.0188184	Positive
O35413	Sorbs2	0.491162	0.00235168	0.0188184	Positive
Q6AY21	G3bp2	0.491063	0.00235724	0.0188184	Positive
A0A0G2K3Z9	Prdx1	-0.491045	0.00235822	0.0188184	Negative
Q5U328	Ncl	0.490717	0.00237663	0.0188894	Positive
A0A0G2JSH2	Bdh1	0.490152	0.00240857	0.0189924	Positive
P62282	Rps11	0.49015	0.0024087	0.0189924	Positive
O70511-3	Ank3	0.532609	0.00244588	0.0192094	Positive
P63029	Tpt1	0.488895	0.00248108	0.0194091	Positive
P08644-2	Kras	0.488716	0.00249151	0.0194142	Positive
A0A0G2JU11	Rapgef2	0.488036	0.00253165	0.019516	Positive
D3ZH36	Elfn2	0.487617	0.00255669	0.019516	Positive
D3ZQG6	Trim2	0.487606	0.00255732	0.019516	Positive
D4A0E8	Prmt5	0.487592	0.0025582	0.019516	Positive
P12785	Fasn	0.487541	0.00256124	0.019516	Positive
D3ZXH7	Alyref	0.500669	0.0025635	0.019516	Positive
Q5GFD9	Impact	0.487089	0.0025885	0.0195795	Positive
G3V9G4	Acly	0.487039	0.00259154	0.0195795	Positive
F1M5M9	Srgap3	0.486848	0.00260318	0.0195928	Positive
P19627	Gnaz	0.486638	0.00261597	0.0196148	Positive
P50475	Aars	0.485897	0.00266165	0.0198823	Positive
D4A9A3	Cenpv	0.490409	0.00278257	0.0207065	Positive
Q01728-2	Slc8a1	0.483829	0.00279282	0.0207065	Positive
P45479	Ppt1	0.483089	0.00284112	0.0209862	Positive
P0DMW1	Hspa1a	-0.482564	0.00287576	0.0211635	Negative
Q32PX6	Rhog	-0.488576	0.00290199	0.0212777	Negative
F1LMC7	Sept7	0.48142	0.00295266	0.0215696	Positive
Q5RKJ9	Rab10	0.481216	0.00296659	0.021592	Positive
O08816	Wasl	0.486744	0.00302586	0.021943	Positive
F1M2K6	Pkp4	0.480184	0.00303779	0.0219494	Positive
O88768	Adap1	0.478974	0.00312308	0.0224839	Positive
P05370	G6pdx	0.478658	0.0031457	0.022565	Positive
P84092	Ap2m1	0.478344	0.00316833	0.0226456	Positive
A0A0G2JTN4	LOC100912917	0.477917	0.00319933	0.0227566	Positive
M0R9I6	Amt	0.477815	0.00320677	0.0227566	Positive
D3ZZC1	Txndc5	0.483961	0.00322274	0.0227885	Positive
D3ZHI9	Ppp2r5e	0.477357	0.00324043	0.0228324	Positive
Q80W98	Sgtb	0.481724	0.00338896	0.0237946	Positive
D3ZE72	Metap1	-0.524282	0.00350671	0.024491	Negative
P06685	Atp1a1	-0.47379	0.00351281	0.024491	Negative
P11980-2	Pkm	0.472988	0.00357673	0.0248495	Positive
A0A0A0MY13	Gpr158	0.47279	0.00359264	0.0248731	Positive
B2RYI2	Srp68	0.472124	0.00364668	0.0251596	Positive
A0A0G2JUL7	Sept11	0.47173	0.00367899	0.0252946	Positive
O35889	Mllt4	0.47104	0.00373615	0.0255991	Positive
D4A720	Srsf7	0.470199	0.00380686	0.0259939	Positive
F1M013	LOC100910109	0.46987	0.0038349	0.0260585	Positive
A0A096MKH2	Vta1	0.476072	0.00384255	0.0260585	Positive
D3ZUW0	Psd3	0.469166	0.00389532	0.026193	Positive
Q9Z1T4	Cnksr2	0.469098	0.0039012	0.026193	Positive
Q08602	Rabggta	0.46909	0.00390192	0.026193	Positive
D4A304	Diras1	0.481413	0.00394504	0.0263192	Positive
G3V7U4	Lmnb1	0.468428	0.00395961	0.0263192	Positive
P02770	Alb	0.468419	0.00396046	0.0263192	Positive
P0CC09	Hist2h2aa3	0.467251	0.00406404	0.0269175	Positive
P12369	Prkar2b	0.465834	0.00419291	0.0276787	Positive
Q68FS2	Cops4	0.465529	0.00422111	0.0277727	Positive
Q64057	Aldh7a1	0.465163	0.0042552	0.0278313	Positive
P22062	Pcmt1	0.465132	0.00425803	0.0278313	Positive
P09495	Tpm4	0.464906	0.00427922	0.0278423	Positive
A0A0G2JT93	Ctnnb1	0.464815	0.00428775	0.0278423	Positive
Q60587	Hadhb	0.464262	0.00434002	0.0280899	Positive
Q62950	Crmp1	0.463146	0.00444718	0.0286901	Positive
P62907	Rpl10a	0.462649	0.00449564	0.0289088	Positive
G3V6T7	Pdia4	0.462383	0.00452166	0.0289824	Positive
P68255	Ywhaq	0.461528	0.00460649	0.0294311	Positive
D4A6G6	LOC100362339	-0.46137	0.00462233	0.0294377	Negative
P85834	Tufm	0.46001	0.00476054	0.0302211	Positive
G3V8T9	Bax	0.4722	0.00480745	0.0304216	Positive
P81377	Prkar1b	0.459025	0.00486278	0.0306161	Positive
Q499Q4	Pgm1	0.458966	0.00486899	0.0306161	Positive
F7EPH4	Ppa1	0.458472	0.00492102	0.0308456	Positive
Q4FZT2	Ppme1	0.45753	0.00502169	0.0313777	Positive
G3V8G2	Psmd5	0.456264	0.00515964	0.0321386	Positive
Q07009	Capn2	0.456055	0.00518272	0.0321815	Positive
A0A0G2K719	Ddx3y	0.455767	0.00521473	0.0322719	Positive
D4AE00	Ap3b2	0.455539	0.00524015	0.0322719	Positive
M0R5H1	Etl4	0.455448	0.00525031	0.0322719	Positive
Q63610	Tpm3	-0.455253	0.00527223	0.0322719	Negative
Q63798	Psme2	0.454813	0.00532182	0.0322719	Positive
B5DEL8	LOC100361505	0.454781	0.00532544	0.0322719	Positive
G3V6T1	Copa	0.454719	0.0053325	0.0322719	Positive
Q99JD5	Bcat1	0.45464	0.00534152	0.0322719	Positive
A0A0H2UHT6	LOC100362298	0.454622	0.00534346	0.0322719	Positive
E9PTV0	Guk1	0.46001	0.00542956	0.0326925	Positive
F1MA36	Sptbn2	0.453504	0.0054719	0.0328009	Positive
A0A0G2JUZ5	NA	0.486833	0.00548057	0.0328009	Positive
Q6P9U0	Serpinb6	0.452764	0.00555831	0.0331663	Positive
D3ZS58	Ndufa2	-0.458638	0.00558811	0.0332442	Negative
Q6AXT5	Rab21	0.451702	0.00568447	0.0336546	Positive
Q8CFD0	Sfxn5	0.451633	0.00569271	0.0336546	Positive
B2RYP4	Snx2	0.451507	0.00570791	0.0336546	Positive
Q6P7Q4	Glo1	0.450831	0.00578966	0.0339886	Positive
P14841	Cst3	-0.450757	0.00579875	0.0339886	Negative
P56574	Idh2	0.450595	0.00581857	0.0340044	Positive
Q6T487	Actn1	0.449574	0.00594456	0.0344764	Positive
A0A0G2K890	Ezr	0.44953	0.00595001	0.0344764	Positive
P54313	Gnb2	0.449487	0.00595537	0.0344764	Positive
Q5BJN7	LOC100360647	-0.475282	0.00597732	0.0344764	Negative
P27653	Mthfd1	0.449242	0.00598609	0.0344764	Positive
D3ZU84	Stxbp5l	0.449048	0.00601043	0.0345166	Positive
P62260	Ywhae	0.448716	0.00605229	0.0346568	Positive
A0A0A0MXW1	Bckdhb	0.454528	0.00608708	0.0347558	Positive
P04905	Gstm1	0.448171	0.00612159	0.0348527	Positive
F2Z3Q8	Kpnb1	0.447733	0.00617785	0.0350725	Positive
D3ZC15	Rltpr	0.447541	0.00620257	0.0351126	Positive
P21575-5	Dnm1	0.447286	0.00623559	0.0351992	Positive
Q5RKI1	Eif4a2	0.446807	0.00629811	0.035422	Positive
A0A0G2K4Y7	NA	0.44671	0.00631071	0.035422	Positive
G3V7U2	Map1a	0.44639	0.00635281	0.0355578	Positive
Q76EQ0	Srr	0.445893	0.00641867	0.0358255	Positive
O35987	Nsfl1c	0.445435	0.00647995	0.035967	Positive
D4ADD7	Glrx5	0.445433	0.00648022	0.035967	Positive
Q6P2A5	Ak3	0.450823	0.00656915	0.0363591	Positive
P63312	Tmsb10	0.444585	0.00659487	0.0364	Positive
A0A0G2JW01	NA	0.444401	0.00661997	0.0364373	Positive
G3V9J7	Rabep1	0.443878	0.0066918	0.0366783	Positive
P02680-2	Fgg	0.443814	0.00670066	0.0366783	Positive
Q4QQT3	Celf1	0.449618	0.00673287	0.0367533	Positive
F1LMV9	Coro2b	0.44251	0.00688278	0.0374687	Positive
Q9JHW0	Psmb7	0.442239	0.00692122	0.037575	Positive
A8WCF8	Tprg1l	0.441847	0.00697697	0.0377745	Positive
P63331	Ppp2ca	0.441052	0.0070915	0.0382051	Positive
P11506-14	Atp2b2	0.441028	0.00709495	0.0382051	Positive
D4AE96	Ipo7	0.440885	0.00711566	0.038213	Positive
A0A096MJN4	Sept4	0.439103	0.00737889	0.0394892	Positive
G3V7I5	Aldh1b1	-0.439009	0.00739304	0.0394892	Negative
Q4KM49	Yars	0.438498	0.00747011	0.0397939	Positive
D4A1S6	Ppp1r12a	0.463072	0.00760854	0.0404053	Positive
P11348	Qdpr	-0.437482	0.00762555	0.0404053	Negative
A0A0G2JV31	NA	0.436938	0.00770989	0.0407435	Positive
A0A0G2K6X6	Mark2	0.436519	0.00777537	0.0409655	Positive
G3V8L9	Ptrf	0.448585	0.00779313	0.0409655	Positive
Q68FW9	Cops3	0.436148	0.00783374	0.0409873	Positive
F1M5N4	Me3	0.436117	0.00783854	0.0409873	Positive
Q6AXX6	Fam213a	0.435964	0.00786273	0.0410059	Positive
C0JPT7	Flna	0.467959	0.00793662	0.0412829	Positive
Q63083	Nucb1	0.43517	0.00798934	0.041396	Positive
P41562	Idh1	0.435104	0.00800003	0.041396	Positive
F1M1D5	Tbcd	0.434721	0.00806172	0.0415632	Positive
P97532	Mpst	0.434644	0.00807418	0.0415632	Positive
Q9QXQ0	Actn4	0.434175	0.00815054	0.0418478	Positive
G3V6L4	Kif5c	0.433443	0.00827078	0.0423146	Positive
Q5I0D5	Lhpp	0.433295	0.00829532	0.0423146	Positive
P11530	Dmd	0.433148	0.00831972	0.0423146	Positive
F1LMY3	Ptprz1	0.433107	0.00832663	0.0423146	Positive
D3Z9H2	Hapln4	0.432762	0.0083841	0.042498	Positive
A0A0G2JSJ3	Slc2a3	0.432539	0.00842148	0.0425788	Positive
P36972	Aprt	-0.431777	0.00855034	0.0431206	Negative
Q32KK2	Arsa	0.443515	0.00860778	0.0433004	Positive
P62982	Rps27a	0.431026	0.00867892	0.043548	Positive
D4A3D9	Stk32c	0.441856	0.00888969	0.0444932	Positive
Q9WV97	Timm9	0.429664	0.00891636	0.0445146	Positive
F1LMB9	Exoc2	0.429176	0.00900272	0.0448331	Positive
O35077	Gpd1	0.429029	0.00902884	0.0448508	Positive
A0A0G2K6S9	Myh11	0.428014	0.00921127	0.0456429	Positive
D3ZZP2	Rab39a	-0.467065	0.00926421	0.045791	Negative
A0A0G2K1S6	Me1	0.427571	0.00929186	0.0458137	Positive
F1LPP6	Akap5	0.427375	0.00932779	0.045877	Positive
Q5PQK2	Fus	0.42715	0.00936913	0.0459666	Positive
F1LSX1	RGD1307929	0.458895	0.00941407	0.0460733	Positive
G3V9M3	Wdr47	0.426355	0.00951622	0.0463728	Positive
M0R3X6	Cbr1	0.426325	0.00952195	0.0463728	Positive
D4ADU2	Slc7a11	0.426079	0.00956779	0.0464822	Positive
P10818	Cox6a1	0.425804	0.00961955	0.0466196	Positive
F7EUU4	NA	0.425303	0.00971402	0.0469629	Positive
Q9QXY2-2	Srcin1	0.424898	0.00979128	0.0472215	Positive
Q9ER24	Atxn10	0.42439	0.00988868	0.0475758	Positive
F1M9W9	Trappc8	0.448574	0.0100233	0.0481069	Positive
G3V8T4	Ddb1	0.423391	0.0100826	0.0482751	Positive
A0A0H2UHC0	Arhgap44	0.423103	0.0101391	0.0484288	Positive
Q5XI22	Acat2	0.422948	0.0101696	0.0484578	Positive
D3Z8I7	Gstt3	0.422805	0.0101979	0.0484766	Positive
B2RYG6	Otub1	0.422536	0.0102511	0.0486132	Positive
Q9JMJ4	Prpf19	0.42209	0.01034	0.0489182	Positive
P07323	Eno2	-0.421753	0.0104077	0.0491214	Negative
O08700	Vps45	0.421404	0.0104781	0.0493364	Positive
Q4V8N0	Tinagl1	0.467615	0.0105324	0.0494748	Positive
P85515	Actr1a	0.420248	0.0107142	0.0501313	Positive
F1LMM8	Pdk2	0.420207	0.0107226	0.0501313	Positive
D3ZDB9	Nmral1	0.420035	0.0107582	0.0501759	Positive
A0A0G2K1D2	NA	0.419917	0.0107826	0.0501759	Positive
B5DEY8	Snx6	0.419621	0.0108439	0.0502326	Positive
Q03114	Cdk5	0.419615	0.0108454	0.0502326	Positive
D3ZXL9	Kctd4	-0.419437	0.0108825	0.0502871	Negative
A0A0A0MY16	Cadm2	0.418752	0.0110263	0.0507469	Positive
O35567	Atic	0.41872	0.011033	0.0507469	Positive
Q5FVH2	Pld3	0.424114	0.0111139	0.0510009	Positive
P47860	Pfkp	0.41813	0.0111585	0.0510873	Positive
G3V960	Gamt	0.429306	0.0112874	0.0515586	Positive
A0A0G2JZX9	NA	0.417204	0.0113574	0.0517168	Positive
A0A140TAI1	Ubqln1	0.417127	0.011374	0.0517168	Positive
B5DFK6	Ap3d1	0.41699	0.0114038	0.0517339	Positive
A0A0G2K4G3	Nedd8	0.416712	0.0114644	0.0518902	Positive
A0A0G2K8W9	Sptbn1	0.415034	0.0118358	0.0533949	Positive
P20171	Hras	0.414968	0.0118506	0.0533949	Positive
P61980	Hnrnpk	0.414808	0.0118866	0.0534358	Positive
Q6AYG3	Prune	0.414471	0.0119626	0.053556	Positive
A0A0G2K2P5	Tjp1	0.414451	0.0119672	0.053556	Positive
Q63616	Vps33b	0.4259	0.0120252	0.0536216	Positive
A0A0G2K9V6	Tars	0.414148	0.0120359	0.0536216	Positive
Q62825	Exoc3	0.413705	0.0121371	0.0539086	Positive
G3V8Q1	Cope	0.419354	0.0121545	0.0539086	Positive
Q99J82	Ilk	0.413117	0.0122725	0.0543105	Positive
A0A0G2JTR4	NA	0.412795	0.0123472	0.0545196	Positive
Q6PST4	Atl1	0.412411	0.0124366	0.0547928	Positive
Q04940	Nrgn	-0.411002	0.0127699	0.0561366	Negative
P70645	Blmh	0.410861	0.0128036	0.0561607	Positive
Q5XIG8	Strap	0.410074	0.0129935	0.0568679	Positive
D4AB03	Fam120a	0.40977	0.0130676	0.0570665	Positive
Q5FVJ0	Rufy3	0.408912	0.0132783	0.0578597	Positive
D4A644	Map7d1	0.408472	0.0133875	0.0580813	Positive
O55096	Dpp3	0.408452	0.0133923	0.0580813	Positive
G3V9W5	Pip4k2c	0.408187	0.0134586	0.0580813	Positive
D3ZWA8	Appl1	0.408183	0.0134595	0.0580813	Positive
P11730	Camk2g	0.40812	0.0134753	0.0580813	Positive
Q5U2N3	Pitpnm1	-0.407906	0.0135288	0.0581857	Negative
Q5XHZ0	Trap1	0.407723	0.0135748	0.0582575	Positive
F1LUY5	Ttc7b	0.407449	0.013644	0.058428	Positive
Q68FR9-2	Eef1d	-0.406706	0.0138331	0.0591104	Negative
O35547-2	Acsl4	0.406298	0.0139379	0.059422	Positive
A0A0G2JW88	NA	0.40619	0.0139658	0.059422	Positive
G3V8Z9	Cops7a	0.405559	0.0141292	0.0599886	Positive
P01946	Hba1	0.405033	0.0142668	0.0604437	Positive
P97608	Oplah	0.435407	0.0143586	0.0606997	Positive
P97536	Cand1	0.404572	0.0143883	0.0606997	Positive
F1LQV9	Lin7a	0.404134	0.0145045	0.0610605	Positive
Z4YNF4	Acp1	-0.403947	0.0145545	0.0611413	Negative
P62744	Ap2s1	0.403681	0.0146258	0.061311	Positive
Q4G064	Coq5	0.40893	0.0147233	0.0615898	Positive
P35435	Atp5c1	0.403089	0.0147851	0.061668	Positive
D4A054	Ranbp2	0.433644	0.014804	0.061668	Positive
E9PTW1	Scamp3	-0.413859	0.0149684	0.0621506	Negative
D4A249	Mblac2	0.413806	0.0149824	0.0621506	Positive
Q924S5	Lonp1	-0.40183	0.0151292	0.0626284	Negative
Q5VLR5	Erp44	0.400768	0.0154247	0.0637191	Positive
B2GV15	Dbt	0.400581	0.0154772	0.0638032	Positive
Q5HZE4	Mri1	0.399797	0.0156989	0.0645833	Positive
G3V8K2	Gng3	0.399617	0.0157503	0.0646607	Positive
D4A719	Snx12	0.39932	0.0158353	0.0648757	Positive
A0A0G2JSR7	Matr3	0.398883	0.015961	0.0652563	Positive
Q6MG60	Ddah2	0.398533	0.0160623	0.0655356	Positive
A0A0G2K9A9	Fbxo41	0.415728	0.0161222	0.0656453	Positive
F1M779	Cltc	0.397921	0.0162406	0.0657835	Positive
Q64559-1	Acot7	0.397819	0.0162706	0.0657835	Positive
P85968	Pgd	-0.397783	0.0162813	0.0657835	Negative
P04631	S100b	0.397758	0.0162886	0.0657835	Positive
A0A0G2JXY9	Epn2	-0.397336	0.0164128	0.0661506	Negative
Q6P503	Atp6v1d	0.397167	0.0164629	0.0662182	Positive
D4A5X7	Gdap1	0.397007	0.0165104	0.0662749	Positive
Q5PPH0	Enoph1	0.396695	0.0166031	0.066513	Positive
P14480-2	Fgb	0.413347	0.016804	0.0671821	Positive
Q5RKH2	Galk1	0.41932	0.0168974	0.0674199	Positive
Q2IBD4-2	Cttnbp2	0.395393	0.0169954	0.067675	Positive
A0A0G2K7G2	NA	0.405908	0.0172256	0.0684493	Positive
Q8VI04	Asrgl1	-0.394533	0.0172587	0.0684493	Negative
B1WC26	Nans	-0.393766	0.0174964	0.0692536	Negative
Q5XI19	Fermt2	0.404534	0.0176429	0.0696948	Positive
P19944	Rplp1	0.392663	0.0178431	0.0703457	Positive
P18420	Psma1	0.391893	0.0180884	0.0711717	Positive
P61765	Stxbp1	0.391722	0.0181435	0.0712473	Positive
D3ZYX8	Cox7a2l	-0.391519	0.0182087	0.0713431	Negative
G3V936	Cs	0.391423	0.0182397	0.0713431	Positive
P37805	Tagln3	-0.39127	0.0182892	0.071396	Negative
Q5MPA9-3	Dclk2	0.390437	0.0185601	0.072274	Positive
G3V945	Aldh5a1	0.390211	0.0186345	0.072274	Positive
A0A0G2JSV6	NA	0.390197	0.0186391	0.072274	Positive
A0A0G2K7K2	Aifm1	0.390134	0.0186596	0.072274	Positive
D4A1Q9	Ttll12	0.389959	0.0187173	0.0723566	Positive
Q04462	Vars	0.389794	0.0187717	0.0724258	Positive
D3ZFQ8	Cyc1	0.389675	0.0188112	0.0724376	Positive
G3V7C6	Tubb4b	-0.389401	0.018902	0.0726464	Negative
P41542	Uso1	0.389143	0.0189882	0.0728368	Positive
G3V7Y3	Atp5d	0.389022	0.0190285	0.0728508	Positive
P40329	Rars	0.388543	0.0191891	0.0733246	Positive
A0A0H2UHV6	Ppp3r1	0.387938	0.0193938	0.0739644	Positive
Q3B8Q0	Mapre2	0.387133	0.019669	0.0748704	Positive
D4ABN3	Synj1	0.386727	0.0198088	0.0752584	Positive
P62268	Rps23	-0.386084	0.0200323	0.0759606	Negative
A0A0G2K5C8	Stim1	0.385837	0.0201187	0.0759606	Positive
Q68FY0	Uqcrc1	0.385837	0.0201188	0.0759606	Positive
P28037	Aldh1l1	0.385757	0.0201466	0.0759606	Positive
A0A0G2K2V5	NA	0.390717	0.0203048	0.0761884	Positive
P68182	Prkacb	0.385276	0.0203161	0.0761884	Positive
B4F7A9	Csnk2a2	0.385259	0.020322	0.0761884	Positive
B0BNE6	Ndufs8	0.385069	0.0203893	0.0762967	Positive
Q9R063-2	Prdx5	-0.384227	0.0206893	0.0772057	Negative
A0A1P0PBZ6	Trio	0.384169	0.0207099	0.0772057	Positive
P30835	Pfkl	0.384017	0.0207648	0.0772653	Positive
A0A0G2K865	Tpd52	0.383818	0.0208365	0.0773871	Positive
P09117	Aldoc	0.38345	0.0209695	0.0776971	Positive
B0LPN4-2	Ryr2	0.383371	0.0209982	0.0776971	Positive
B2GV06	Oxct1	0.383226	0.0210508	0.0777339	Positive
P00406	Mtco2	-0.383047	0.0211158	0.0777339	Negative
Q497B0	Nit2	-0.399885	0.0211255	0.0777339	Negative
A0A0A0MXW3	H2afz	0.399112	0.0213992	0.0785528	Positive
P09456	Prkar1a	0.382149	0.0214456	0.0785528	Positive
D4A3C2	RGD1304884	0.382092	0.0214666	0.0785528	Positive
D3ZT90	Gcdh	0.387101	0.0215996	0.0788941	Positive
D3ZLC1	Lmnb2	0.381588	0.0216535	0.0789458	Positive
Q568Z6	Ist1	0.381212	0.021794	0.0793126	Positive
F1LPB9	Rph3a	0.380813	0.0219438	0.0797118	Positive
Q6IMX3	Acads	-0.391622	0.0219947	0.079751	Negative
A0A096MIT7	Syn3	0.380375	0.0221092	0.0799048	Positive
Q64537	Capns1	0.380353	0.0221176	0.0799048	Positive
P32232-2	Cbs	0.379504	0.0224415	0.0809278	Positive
G3V8C3	Vim	0.379289	0.0225237	0.0810773	Positive
P63102	Ywhaz	0.37892	0.0226664	0.0814433	Positive
P19527	Nefl	-0.378652	0.0227703	0.0816689	Negative
Q6AXS5	Serbp1	0.378446	0.02285	0.0818073	Positive
P52481	Cap2	0.377897	0.0230647	0.0824273	Positive
A0A0G2K0T5	Micu1	-0.37756	0.0231974	0.0827527	Negative
B0K008	Eif1	-0.406342	0.02331	0.0830053	Negative
Q4KM73	Cmpk1	0.376301	0.0236982	0.0842368	Positive
A0A0G2K7G7	Sept8	0.375786	0.0239055	0.084822	Positive
P21708	Mapk3	-0.37518	0.0241516	0.0855422	Negative
Q6PEC1	Tbca	0.374719	0.0243402	0.0860569	Positive
Q6P9U8	Eif3h	0.37969	0.0244686	0.0863573	Positive
Q6P6Q5	App	-0.374147	0.024576	0.0865823	Negative
P05371	Clu	0.373373	0.0248978	0.0875611	Positive
M0RAD5	Clpp	-0.3783	0.0250402	0.0879062	Negative
F1M8H6	Pip5k1c	0.3725	0.0252648	0.0884811	Positive
P04897	Gnai2	0.372433	0.025293	0.0884811	Positive
P55067	Ncan	0.372069	0.0254476	0.0888538	Positive
D4AEH3	Psmd7	0.371972	0.025489	0.0888538	Positive
G3V784	Adpgk	0.388294	0.0255485	0.0889053	Positive
Q7TPB1	Cct4	0.371485	0.0256975	0.0892674	Positive
P62329	Tmsb4x	0.370925	0.0259385	0.0899472	Positive
G3V624	Coro1c	0.370391	0.0261705	0.0905938	Positive
P35439	Grin1	0.370172	0.0262658	0.0907655	Positive
P25113	Pgam1	0.369964	0.0263571	0.0909228	Positive
Q9R1B1	Timm10b	-0.369162	0.0267104	0.0919088	Negative
F1LNY3	Ncam1	0.369105	0.0267354	0.0919088	Positive
Q99JE4	Rasgrf2	0.368776	0.0268818	0.0922523	Positive
F1LRB8	LOC100363915	-0.379075	0.0270398	0.0926346	Negative
M0R5T4	Rac3	-0.378464	0.0273076	0.0933912	Negative
A0A0G2JSL0	Psmb6	-0.36753	0.0274417	0.0936884	Negative
A0A0G2JYT1	Erc1	-0.367113	0.0276311	0.0941733	Negative
Q05175	Basp1	0.366829	0.0277604	0.094452	Positive
G3V6H0	LOC100363782	0.36649	0.0279162	0.0948196	Positive
A0A0G2QC17	Pdp1	0.371205	0.0281322	0.0953323	Positive
Q561S0	Ndufa10	0.365954	0.0281631	0.0953323	Positive
Q63666-3	Vamp1	-0.370991	0.0282302	0.0953968	Negative
E2RUH2	Rnh1	0.365675	0.0282927	0.0954458	Positive
F1LZV1	Kalrn	0.381528	0.0284642	0.0956797	Positive
Q5RK08	Gbas	0.365241	0.0284947	0.0956797	Positive
P14668	Anxa5	0.365128	0.0285478	0.0956797	Positive
P25409	Gpt	-0.375686	0.0285546	0.0956797	Negative
A0A0G2JVW5	NA	0.364932	0.0286394	0.0958022	Positive
Q3B7V5	Rab2b	-0.380578	0.0288948	0.0964407	Negative
P09606	Glul	0.364321	0.0289274	0.0964407	Positive
P05065	Aldoa	0.364194	0.0289874	0.0964789	Positive
P68370	Tuba1a	-0.363671	0.0292364	0.0971451	Negative
A0A0U1RVI9	Rps2	0.363432	0.0293506	0.0973618	Positive
D4A1R8	Cpne1	0.363023	0.029547	0.0977007	Positive
G3V8B3	LOC100910200	0.363014	0.0295512	0.0977007	Positive
Q9ER34	Aco2	0.362501	0.0297989	0.0983563	Positive
Q99MG9	Kcnip4	0.384211	0.0299265	0.0984299	Positive
D4ADD8	Dctn6	-0.362231	0.0299302	0.0984299	Negative
F1LN59	Eif4g2	0.37265	0.0299698	0.0984299	Positive
F8WFW5	Pde2a	0.361896	0.0300934	0.0985666	Positive
G3V7P8	Ndrg4	0.361861	0.0301107	0.0985666	Positive
Q6IRK9	Cpq	-0.383605	0.0302086	0.0987245	Negative
P67779	Phb	0.361283	0.0303941	0.0991675	Positive
A0A0G2JSI1	Aldh9a1	-0.360808	0.0306289	0.09977	Negative
F1LPD6	Acaa1b	0.370367	0.0310721	0.101048	Positive
Q5U1Z2	Trappc3	-0.387578	0.0312193	0.101361	Negative
A0A0G2K059	Mcu	0.35946	0.0313037	0.101469	Positive
F1M471	Epm2aip1	0.359061	0.0315055	0.101957	Positive
Q63633-2	Slc12a5	0.358605	0.0317376	0.102541	Positive
O35244	Prdx6	0.358327	0.0318798	0.102739	Positive
B2RYJ7	Actr1b	0.358283	0.0319023	0.102739	Positive
Q66H61	RGD1562301	0.368177	0.0321595	0.103399	Positive
Q6J4I0	Ppp1r1b	0.357575	0.0322669	0.103577	Positive
Q66HR2	Mapre1	0.357382	0.0323668	0.10373	Positive
Q62785	Pdap1	0.362244	0.0324793	0.103923	Positive
Q6P9V9	Tuba1b	-0.357027	0.0325517	0.103987	Negative
G3V912	Tmx4	0.361318	0.0329585	0.105118	Positive
Q63610-2	Tpm3	0.355817	0.033187	0.105677	Positive
B0BNE5	Esd	0.355617	0.033293	0.105845	Positive
A0A0G2K189	Scrn3	0.354936	0.0336561	0.106693	Positive
F1M775	Diaph1	0.354916	0.0336671	0.106693	Positive
P24155	Thop1	0.354412	0.0339377	0.107135	Positive
Q9Z1N4	Bpnt1	0.354385	0.0339524	0.107135	Positive
B1WBW4	Armc10	0.354356	0.0339682	0.107135	Positive
Q566E4	Hnrnpr	-0.353926	0.0342008	0.107697	Negative
G3V7K3	Cp	0.400651	0.0346168	0.108835	Positive
Q5RJN0	Ndufs7	0.352893	0.0347651	0.108984	Positive
D4ABB2	Mlc1	0.357904	0.0347739	0.108984	Positive
P49242	Rps3a	-0.35255	0.0349541	0.109332	Negative
A0A0G2K9A2	Arpc2	0.352412	0.0350305	0.109332	Positive
D3ZDT1	Epb41l2	0.352376	0.0350501	0.109332	Positive
A0A0G2K7P9	Ncam2	0.352247	0.035122	0.109385	Positive
Q6AY09	Hnrnph2	0.3519	0.0353149	0.109813	Positive
A0A0H2UHF9	Ablim2	0.351309	0.035645	0.110557	Positive
A0A0G2JWS2	Nebl	-0.351196	0.0357086	0.110557	Negative
M0R7U1	Ak5	0.351174	0.035721	0.110557	Positive
A0A0G2JSH9	Prdx2	0.350517	0.0360921	0.111532	Positive
Q64303	Pak2	-0.360037	0.0364787	0.112416	Negative
P04904	Gsta3	0.349816	0.0364912	0.112416	Positive
F1LNF1	Hnrnpa2b1	0.349249	0.0368168	0.113243	Positive
A0JPM9	Eif3j	0.348356	0.037334	0.114609	Positive
A0A140TAH1	Hgs	0.348194	0.0374288	0.114609	Positive
F1LMV8	Prkce	0.348185	0.037434	0.114609	Positive
A0A0G2K1G8	NA	0.347359	0.0379187	0.115915	Positive
Q00566-2	Mecp2	0.346671	0.0383266	0.116982	Positive
F1M1A6	LOC681355	0.346488	0.0384357	0.117134	Positive
G3V6Y6	Pygb	0.346268	0.0385676	0.117264	Positive
P15800	Lamb2	0.34622	0.0385961	0.117264	Positive
B0BN63	Ahsa1	0.345953	0.038756	0.11757	Positive
P63245	Gnb2l1	-0.35067	0.0388903	0.117644	Negative
B5DF41	Snph	0.345716	0.0388989	0.117644	Positive
Q6AY99	Akr1b10	0.345506	0.0390257	0.117848	Positive
Q641Z9	Sdhc	0.344319	0.0397482	0.119848	Positive
P12346	Tf	0.343907	0.0400013	0.120158	Positive
Q9WUC4	Atox1	0.343905	0.0400026	0.120158	Positive
P00173-2	Cyb5a	0.353906	0.0400326	0.120158	Positive
P0C5X8	Ttyh1	0.343746	0.0401009	0.120182	Positive
P82995	Hsp90aa1	0.343475	0.0402686	0.120502	Positive
D3ZC56	Dst	0.343133	0.0404807	0.120839	Positive
Q6IMX8	Acot2	0.343098	0.0405026	0.120839	Positive
Q9JKB7	Gda	0.342991	0.040569	0.120856	Positive
P15178	Dars	0.342758	0.0407144	0.121107	Positive
A0A0G2KAM4	NA	0.342354	0.0409679	0.121679	Positive
P02688-3	Mbp	-0.34697	0.0411435	0.122018	Negative
O54922	Exoc7	0.341662	0.0414048	0.12261	Positive
Q8K1Q0	Nmt1	0.341005	0.0418228	0.123499	Positive
P63055	Pcp4	-0.340994	0.0418294	0.123499	Negative
P40112	Psmb3	0.340541	0.0421202	0.124173	Positive
Q78PB6-2	Ndel1	0.344699	0.0425774	0.125335	Positive
Q66HM7	Ssb	0.338126	0.0436953	0.128276	Positive
P54319	Plaa	0.364651	0.0437055	0.128276	Positive
Q6P7A7	Rpn1	0.337537	0.0440863	0.129203	Positive
A1L1M0	Prkaca	0.337348	0.0442128	0.129383	Positive
F1LPA3	Iqsec3	0.337092	0.0443838	0.129692	Positive
B0BNJ4	Ethe1	0.336697	0.0446496	0.130277	Positive
Q5XI39	Cryzl1	0.341367	0.0447552	0.130394	Positive
D3Z9L0	Agk	0.336296	0.0449204	0.130669	Positive
P19139	Csnk2a1	0.336206	0.0449813	0.130669	Positive
Q07310	Nrxn3	0.335882	0.0452009	0.131116	Positive
Q6PEC4	Skp1	0.335661	0.0453516	0.1313	Positive
A0A0G2JZA2	Grpel1	0.335595	0.0453966	0.1313	Positive
D4A4L4	Map7d2	0.335362	0.045556	0.131569	Positive
D4AEK9	Ccdc6	0.33932	0.0461366	0.132902	Positive
A0A0G2JZ69	Sptan1	0.334481	0.0461622	0.132902	Positive
Q6IMX4	Ppap2b	-0.334401	0.0462181	0.132902	Negative
Q5BJZ3	Nnt	0.334292	0.0462933	0.132926	Positive
Q71TY3	Rps27	-0.334159	0.0463857	0.132999	Negative
Q1RP74	LOC100911774	0.343623	0.0466177	0.13328	Positive
Q91V33	Khdrbs1	-0.333748	0.046672	0.13328	Negative
Q6Q7Y5	Gna13	0.333729	0.046685	0.13328	Positive
P13221	Got1	-0.333157	0.0470857	0.134231	Negative
F1LMT5	Pex5l	0.332939	0.0472393	0.134476	Positive
D3ZC55	Hspa12a	0.332479	0.0475642	0.135208	Positive
A0A0G2K3V4	NA	0.332151	0.0477971	0.135676	Positive
A0A096MJ42	Dlg3	0.331678	0.0481351	0.1364	Positive
Q9Z0U4-2	Gabbr1	0.331504	0.0482595	0.1364	Positive
Q9WU70-3	Stxbp5	0.331487	0.048272	0.1364	Positive
D3ZY47	RGD1559896	0.33141	0.0483268	0.1364	Positive
Q642B0	Gpc4	0.330574	0.0489303	0.137757	Positive
P62859	Rps28	-0.330484	0.0489953	0.137757	Negative
A0A0G2K542	Ugp2	0.330456	0.0490156	0.137757	Positive
F1LQ48	Hnrnpl	0.329953	0.0493816	0.138589	Positive
D3ZW08	Adsl	0.329676	0.0495844	0.138858	Positive
A0A0G2JY26	Dnajc6	0.329632	0.049617	0.138858	Positive
P50399	Gdi2	-0.32942	0.0497725	0.139097	Negative
G3V927	Dlgap4	-0.329273	0.0498803	0.139159	Negative
A2VD09	Abi1	0.3292	0.0499347	0.139159	Positive
P60841	Ensa	-0.328315	0.0505903	0.140788	Negative
A0A0G2K1M2	Dlg1	0.327967	0.0508498	0.141174	Positive
B0K017	Adprhl2	0.327939	0.0508708	0.141174	Positive
Q64548	Rtn1	0.327205	0.0514217	0.142503	Positive
O35274	Ppp1r9b	0.326968	0.0516013	0.142802	Positive
P35400	Grm7	0.336007	0.0520324	0.143795	Positive
G3V9T7	Asna1	0.326111	0.0522525	0.144202	Positive
G3V6R5	Suox	0.325827	0.0524699	0.144602	Positive
E9PSJ4	Spag9	0.325436	0.0527708	0.145047	Positive
F7FHF7	LOC100911485	0.325412	0.0527887	0.145047	Positive
P23711	Hmox2	0.325332	0.0528505	0.145047	Positive
Q64560	Tpp2	0.325038	0.053078	0.14547	Positive
A0A0H2UHM5	Pdia3	-0.324075	0.0538271	0.14732	Negative
P62632	Eef1a2	0.32373	0.0540974	0.147856	Positive
P40307	Psmb2	0.323498	0.0542797	0.148008	Positive
D3ZPJ0	Shisa7	-0.32347	0.0543021	0.148008	Negative
A0A0G2JVM0	Aldh4a1	-0.322912	0.0547435	0.149007	Negative
B0BN65	Fam49a	0.322177	0.0553289	0.150395	Positive
A0A0G2K1L8	NA	0.322039	0.0554392	0.150429	Positive
I6L9G6	Tardbp	0.321972	0.0554928	0.150429	Positive
B2RYQ2	Ppp2r4	0.321046	0.0562394	0.152089	Positive
P62828	Ran	0.321022	0.0562584	0.152089	Positive
M0R776	Mrps36	0.320391	0.0567717	0.153191	Positive
P28480	Tcp1	0.320332	0.0568202	0.153191	Positive
Q8CG45	Akr7a2	0.320201	0.0569267	0.15327	Positive
Q6PCT9	Psmd6	0.320026	0.0570703	0.153449	Positive
H1UBN0	Cpne7	0.318919	0.0579832	0.155669	Positive
Q63151	Acsl3	0.323439	0.0580529	0.155669	Positive
Q5U2S7	Psmd3	0.318232	0.0585561	0.156807	Positive
O54701	Slc24a2	0.322582	0.0587594	0.15714	Positive
Q5MJ12	Fbxl16	-0.317851	0.0588757	0.157239	Negative
B0BMW2	Hsd17b10	0.317143	0.0594728	0.158621	Positive
Q7M0E3	Dstn	0.316624	0.059914	0.159583	Positive
P02401	Rplp2	0.31637	0.0601305	0.159945	Positive
D3ZWV8	Tiam1	0.330162	0.0605848	0.160745	Positive
D3Z8D7	LOC100361854	0.31583	0.060593	0.160745	Positive
D3ZFB6	Prrt2	-0.31502	0.0612928	0.162385	Negative
Q5U2N2	Usp14	0.314885	0.0614098	0.162478	Positive
F1LQN3	Rtn4	0.314514	0.061733	0.162766	Positive
G3V640	Timm44	0.32373	0.061804	0.162766	Positive
D3Z941	Mars	0.314416	0.0618185	0.162766	Positive
Q5RJR8	Lrrc59	0.314384	0.0618461	0.162766	Positive
A0A0G2K9J2	Atp6v1h	0.313343	0.0627613	0.164956	Positive
A0A0G2K4U8	Stx12	0.31312	0.0629582	0.165255	Positive
M0R6K4	Dock4	0.312712	0.0633207	0.165987	Positive
D3ZZM9	Ccsap	-0.312436	0.063567	0.166413	Negative
Q6P6V0	Gpi	0.312201	0.0637768	0.166602	Positive
P18422	Psma3	0.312168	0.0638068	0.166602	Positive
F1LN69	Mink1	0.31189	0.0640554	0.16673	Positive
A0A0G2K5X6	Ntrk2	-0.311879	0.0640655	0.16673	Negative
A0A0H2UHV9	Copg2	0.321062	0.0641074	0.16673	Positive
B0BNA5	Cotl1	0.311076	0.0647901	0.168285	Positive
P07943	Akr1b1	0.31062	0.0652048	0.169141	Positive
A0A0H2UHQ0	Slc3a2	0.31023	0.0655605	0.169842	Positive
P04797	Gapdh	-0.309566	0.0661703	0.171198	Negative
D4A8H8	Cyfip1	0.308868	0.0668155	0.172118	Positive
E9PU13	Snx4	0.30884	0.0668416	0.172118	Positive
D4A3E1	Hnrnpll	-0.30882	0.0668604	0.172118	Negative
D3ZSZ6	Dgkh	0.308807	0.0668722	0.172118	Positive
A0A096MJ90	Ly6h	0.308557	0.0671055	0.172318	Positive
P97878	Exoc5	0.308453	0.0672017	0.172318	Positive
F1LNK0	Map2	0.308444	0.06721	0.172318	Positive
D4A9L5	Epb41l1	0.308305	0.0673401	0.172429	Positive
Q05140-2	Snap91	0.308156	0.0674792	0.172445	Positive
Q5XI34	Ppp2r1a	0.308113	0.0675199	0.172445	Positive
Q3MIE4	Vat1	0.307983	0.0676416	0.172516	Positive
Q5FVI4	Cend1	0.307898	0.0677216	0.172516	Positive
A0A0G2K1Q9	Epb41l3	0.307575	0.0680251	0.172764	Positive
D3ZZ21	Ndufb6	-0.307566	0.0680337	0.172764	Negative
P85973	Pnp	0.307517	0.0680795	0.172764	Positive
G3V9P0	Psmd9	0.306976	0.0685905	0.173838	Positive
A0A0G2JZI2	Eprs	0.306761	0.0687945	0.174133	Positive
Q64620	Ppp6c	0.30661	0.0689382	0.174275	Positive
Q62658	Fkbp1a	0.306085	0.0694398	0.17532	Positive
Q8CGU4	Agap2	0.305029	0.0704559	0.17766	Positive
F1LMR7	Dpp6	0.304452	0.0710165	0.178846	Positive
Q5BJT9	Ckmt1b	0.304348	0.0711174	0.178874	Positive
P62994	Grb2	0.304067	0.0713917	0.179213	Positive
Q5BJU7	Wasf1	0.304025	0.0714327	0.179213	Positive
F1LT49	Lrrc47	0.303675	0.0717765	0.179407	Positive
Q9ERB4-2	Vcan	0.303654	0.0717971	0.179407	Positive
Q68FX9	Sirt5	0.303606	0.0718444	0.179407	Positive
P13264	Gls	0.303578	0.0718713	0.179407	Positive
P97685	Nfasc	0.303392	0.0720546	0.179567	Positive
G3V762	Tsta3	0.30764	0.0722078	0.179567	Positive
P81155	Vdac2	0.303191	0.0722529	0.179567	Positive
Q6AY84	Scrn1	0.303147	0.0722966	0.179567	Positive
A0A0G2JZY3	NA	0.307255	0.0725837	0.180055	Positive
P38062	Metap2	0.30181	0.0736265	0.182414	Positive
P0C6S7-3	Anks1b	0.301386	0.0740524	0.183088	Positive
P15791-2	Camk2d	0.301355	0.0740828	0.183088	Positive
Q3KRF2	Hdlbp	0.301233	0.0742061	0.183165	Positive
Q63564	Sv2b	0.300852	0.0745908	0.183726	Positive
A0A0G2K7C1	Bag6	0.300825	0.0746185	0.183726	Positive
D3ZJ86	Slc9a6	0.300394	0.0750558	0.184574	Positive
O08662	Pi4ka	0.300085	0.0753708	0.18512	Positive
P63018	Hspa8	-0.299596	0.0758704	0.186117	Negative
Q9WVK7	Hadh	0.299314	0.0761606	0.186598	Positive
Q6P9V1	Cd81	-0.299073	0.0764085	0.186975	Negative
P26772	Hspe1	-0.29885	0.0766389	0.187308	Negative
Q4G079	Aimp1	0.298506	0.0769951	0.187947	Positive
D3ZET9	NA	0.298014	0.0775069	0.188965	Positive
Q9ERH3	Wdr7	0.297473	0.0780726	0.190111	Positive
O35814	Stip1	0.297	0.0785696	0.19106	Positive
F1LX07	Slc25a12	0.29692	0.0786547	0.19106	Positive
Q4KM74	Sec22b	0.296795	0.0787858	0.191145	Positive
Q5I0G4	Gars	0.29622	0.0793947	0.192387	Positive
P35332	Hpcal4	0.295885	0.0797521	0.193018	Positive
D3ZBL5	Inpp4a	0.295572	0.0800857	0.193589	Positive
G3V7X5	Sparcl1	-0.295345	0.0803292	0.193942	Negative
F1M9G6	Taok1	-0.31348	0.0806205	0.194409	Negative
G3V746	Grin2b	0.29485	0.0808613	0.194635	Positive
A0A0G2QC21	Arhgef7	0.299098	0.0809102	0.194635	Positive
Q80YV8	Cxcl12	-0.298593	0.0814487	0.195694	Negative
Q8R491	Ehd3	0.294215	0.0815477	0.195695	Positive
A0A0G2K151	Apoe	0.294076	0.0816985	0.19582	Positive
F1LMD9	Gak	-0.312137	0.0819967	0.196298	Negative
Q921A2	Slc2a13	-0.2934	0.0824354	0.197111	Negative
P11030	Dbi	0.292541	0.0833792	0.199128	Positive
D4ADF5	Pdcd5	0.292216	0.0837388	0.199747	Positive
Q66HA6	Arl8b	0.291767	0.0842374	0.200695	Positive
Q6AY30	Sccpdh	0.291516	0.0845163	0.200866	Positive
M0R4R4	Gas7	0.291493	0.0845426	0.200866	Positive
A0A0G2JZX5	NA	0.29143	0.0846126	0.200866	Positive
G3V6Q6	Gna11	0.291019	0.0850722	0.201631	Positive
G3V914	Gria2	0.290961	0.0851378	0.201631	Positive
A0A0G2K9C5	Numbl	-0.290807	0.0853099	0.201726	Negative
P59215-2	Gnao1	0.308905	0.0853839	0.201726	Positive
P35465	Pak1	0.290554	0.0855947	0.201726	Positive
P31596	Slc1a2	0.290545	0.0856055	0.201726	Positive
F1M4H5	Nova2	0.294602	0.0858049	0.201726	Positive
P55161	Nckap1	0.290366	0.0858069	0.201726	Positive
Q812E9	Gpm6a	0.290294	0.0858885	0.201726	Positive
D3ZA31	Mtmr2	0.294004	0.0864728	0.202823	Positive
Q5HZV9	Ppp1r7	-0.289701	0.0865596	0.202823	Negative
Q9JKS6-2	Pclo	0.289482	0.0868088	0.20285	Positive
O35095	Ncdn	0.289459	0.0868348	0.20285	Positive
P62278	Rps13	0.289422	0.0868773	0.20285	Positive
B2RZC6	Ilf2	-0.293474	0.0870688	0.203058	Negative
Q5U316	Rab35	0.289088	0.0872579	0.203261	Positive
D4A3N4	Adcy1	-0.297577	0.0874102	0.203377	Negative
G3V6H5	Slc25a11	0.288064	0.0884349	0.205521	Positive
A0A0G2K4U4	Cacnb1	-0.296547	0.0885644	0.205581	Negative
G3V6U3	Alg2	0.287376	0.0892315	0.206888	Positive
A0A0G2JTD7	Clasp1	0.287245	0.0893847	0.207002	Positive
A0A0G2JY08	Myo18a	0.287113	0.0895386	0.207117	Positive
P0C5H9	Manf	0.286512	0.0902417	0.2085	Positive
P62912	Rpl32	0.286238	0.0905632	0.208824	Positive
G3V8V3	Pygm	0.286208	0.0905983	0.208824	Positive
F1LMA4	Adrbk1	0.286053	0.0907806	0.208824	Positive
A0A096MJY6	Gbe1	-0.303866	0.0908783	0.208824	Negative
A0A0G2K8K0	NA	0.285892	0.0909712	0.208824	Positive
P31662	Slc6a17	0.285857	0.0910122	0.208824	Positive
F1LSH6	Hcn1	0.285364	0.0915955	0.20992	Positive
P07936	Gap43	0.285234	0.0917494	0.21003	Positive
P62890	Rpl30	0.284551	0.0925641	0.211651	Positive
Q58FK9	Ccbl2	-0.292555	0.0931463	0.212738	Negative
B0BN83	Armc1	0.283705	0.0935795	0.213457	Positive
Q62688	Plcl1	0.287771	0.0936762	0.213457	Positive
Q2I6B2	Atp6v0a1	0.28327	0.094106	0.213951	Positive
P20156	Vgf	0.283268	0.0941084	0.213951	Positive
M0RB22	Ptprd	0.291304	0.0946194	0.214667	Positive
Q32Q06	Ap1m1	0.286966	0.0946393	0.214667	Positive
P47942	Dpysl2	-0.282603	0.0949169	0.215051	Negative
F1LPQ9	Akap2	0.286604	0.0950738	0.215118	Positive
Q91ZN1	Coro1a	0.282401	0.0951629	0.215118	Positive
F1LM33	Lrpprc	0.281165	0.0966827	0.218305	Positive
B0BN93	Psmd13	0.285073	0.0969331	0.218622	Positive
B0LT89	Stk24	0.298353	0.0971936	0.218961	Positive
Q5FVI3	Lrrc57	0.280074	0.0980393	0.220346	Positive
P18088	Gad1	0.288447	0.0980489	0.220346	Positive
B2GV74	Klc2	0.279877	0.0982852	0.220346	Positive
P60522	Gabarapl2	0.28392	0.0983501	0.220346	Positive
Q499N5	Acsf2	-0.279815	0.0983629	0.220346	Negative
P22734-2	Comt	0.283814	0.0984815	0.220364	Positive
D3ZX42	Rabgap1	0.279383	0.0989048	0.221062	Positive
F1LSG8	Ccdc132	0.29673	0.0991151	0.221283	Positive
O88321	Psmd4	0.278937	0.0994676	0.221821	Positive
Q8CFN2	Cdc42	0.278481	0.100045	0.222857	Positive
A0A0G2K0W9	Psma7	0.278121	0.100503	0.223628	Positive
B0BMX3	S100a16	0.277996	0.100662	0.223731	Positive
Q9R085	Usp15	0.286099	0.100938	0.224093	Positive
F1MA89	Ccny	0.277563	0.101215	0.224458	Positive
D3ZT36	Adam23	-0.277284	0.101573	0.225	Negative
A0A0G2JSU3	Pkn3	0.285279	0.101962	0.225611	Positive
A0A0G2JTG7	Hnrnph1	0.276887	0.102084	0.225629	Positive
Q9JLA3	Uggt1	-0.276409	0.102701	0.226741	Negative
F1M863	Ppfia4	0.284378	0.103097	0.227276	Positive
Q68FU3	Etfb	0.276046	0.103172	0.227276	Positive
P27615	Scarb2	-0.284177	0.10335	0.227416	Negative
P14408-2	Fh	0.275672	0.10366	0.227568	Positive
O35458	Slc32a1	0.275624	0.103722	0.227568	Positive
Q63228	Gmfb	0.275593	0.103763	0.227568	Positive
A0A1W2Q6E9	Msn	0.29269	0.104023	0.227714	Positive
Q5XIH3	Ndufv1	0.275282	0.104169	0.227714	Positive
D3ZJF9	Gla	0.275279	0.104173	0.227714	Positive
P33124	Acsl6	0.27479	0.104814	0.228863	Positive
F1LY19	Upf1	0.27446	0.105249	0.22956	Positive
D4A1Q2	Mapt	0.274369	0.105369	0.229569	Positive
Q5XIT1	Mapre3	0.273805	0.106115	0.23088	Positive
B4F7C2	Tubb4a	0.273739	0.106203	0.23088	Positive
A0A0G2K7W7	Gsk3a	0.27353	0.106481	0.231232	Positive
Q05982	Nme1	0.273348	0.106724	0.231506	Positive
R9PXU6	Vcl	0.272964	0.107236	0.232365	Positive
F1M049	Atxn2	-0.294284	0.108058	0.233635	Negative
Q56A26	Opalin	-0.294191	0.108174	0.233635	Negative
D3ZJR1	Eps15l1	0.272211	0.108248	0.233635	Positive
P83732	Rpl24	-0.272064	0.108446	0.233635	Negative
A0A0G2JUC7	Dctn2	0.272037	0.108482	0.233635	Positive
P62076	Timm13	0.272003	0.108528	0.233635	Positive
P55053	Fabp5	0.270354	0.110772	0.238207	Positive
G3V8J5	Psd	0.269691	0.111684	0.239909	Positive
G3V9S0	Cyb5r1	0.269547	0.111882	0.240076	Positive
Q9EQS0	Taldo1	-0.269282	0.112248	0.240601	Negative
Q498U4	Sarnp	0.269131	0.112458	0.240653	Positive
A0A0G2K5D7	Specc1	0.269044	0.112579	0.240653	Positive
Q6PDW1	LOC100359593	0.269003	0.112636	0.240653	Positive
A0A0G2JZM2	Sec23a	0.268879	0.112808	0.240761	Positive
D3ZDX5	Plxnb1	0.268255	0.113678	0.242359	Positive
B4F774	Gdap1l1	0.268153	0.113821	0.242365	Positive
Q80Z30	Ppm1e	0.268078	0.113925	0.242365	Positive
A0A0G2KAY8	Sep15	0.284608	0.114386	0.242383	Positive
P48500	Tpi1	-0.267747	0.11439	0.242383	Negative
Q7TQ94-2	Nit1	0.267733	0.11441	0.242383	Positive
Q9QX74-2	Shank2	0.267725	0.114421	0.242383	Positive
F1LNX7	Tssc1	0.266488	0.116169	0.245822	Positive
F1LM19	Ahsg	0.266176	0.116613	0.246306	Positive
O35180	Sh3gl3	-0.274153	0.116645	0.246306	Negative
Q568Z9	Phyhip	0.266041	0.116806	0.246383	Positive
A0A096MJE6	Tnr	0.26486	0.1185	0.249692	Positive
P43278	H1f0	0.264599	0.118877	0.25022	Positive
G3V918	Gart	0.264375	0.119201	0.250637	Positive
F1LSR8	Cacna2d3	0.264266	0.119359	0.250703	Positive
P62804	Hist1h4b	0.264003	0.11974	0.250992	Positive
M0R3K6	Fam107a	0.267873	0.119757	0.250992	Positive
P19804	Nme2	0.263911	0.119875	0.250992	Positive
F1M7Q5	Ampd3	0.280408	0.120067	0.251129	Positive
A0A0G2K613	Marcksl1	0.271584	0.12025	0.251247	Positive
Q8R2H0	Atp6v1g2	-0.263473	0.120512	0.251453	Negative
D4AB01	Hint2	0.263412	0.120601	0.251453	Positive
P62628	Dynlrb1	0.263082	0.121085	0.252196	Positive
B3DMA1	Atxn2l	0.261985	0.122702	0.255234	Positive
Q9Z2I7	Svop	0.261918	0.1228	0.255234	Positive
Q6URK4-2	Hnrnpa3	0.26176	0.123035	0.255454	Positive
G3V856	LOC100912512	0.265522	0.123165	0.255458	Positive
Q63198	Cntn1	0.26142	0.123539	0.255967	Positive
G3V733	Syn2	0.261177	0.123902	0.256188	Positive
A0A0U1RRS7	Mapk10	-0.261099	0.124018	0.256188	Negative
P02688	Mbp	-0.261089	0.124033	0.256188	Negative
Q6IRJ7	Anxa7	-0.260178	0.125399	0.25874	Negative
Q5M963	Cmas	-0.260052	0.125588	0.258863	Negative
B5DFN4	Pfdn5	-0.259723	0.126084	0.259581	Negative
F1LSY2	Nptxr	0.259648	0.126198	0.259581	Positive
P61354	Rpl27	-0.262902	0.127049	0.261061	Negative
P61589	Rhoa	-0.258128	0.12851	0.263751	Negative
P04692-5	Tpm1	0.257971	0.128752	0.263751	Positive
Q6RJR6	Rtn3	0.257968	0.128756	0.263751	Positive
Q9EQX9	Ube2n	0.257816	0.128989	0.263956	Positive
D4A133	Atp6v1a	0.256951	0.130324	0.266414	Positive
F1M6V8	Strn4	-0.256748	0.130639	0.266783	Negative
A0A0G2K5N6	Rock2	0.256532	0.130974	0.267176	Positive
A0A0G2JU49	Mtx1	-0.25645	0.131101	0.267176	Negative
Q9QYW3	Mob4	0.255329	0.132853	0.270471	Positive
F1LP57	Map2k4	0.255119	0.133184	0.270866	Positive
P31647	Slc6a11	0.25498	0.133401	0.271031	Positive
P50503	St13	0.254882	0.133556	0.271069	Positive
P06686	Atp1a2	0.254658	0.133909	0.271508	Positive
P27139	Ca2	0.254294	0.134486	0.2724	Positive
F1LP01	Dgkb	-0.253668	0.135481	0.274135	Negative
D4A772	Dtna	0.253475	0.135789	0.274318	Positive
Q3MIE9	Sms	0.257117	0.135941	0.274318	Positive
P36876	Ppp2r2a	-0.253302	0.136065	0.274318	Negative
P62483	Kcnab2	0.253265	0.136124	0.274318	Positive
D3ZFY8	LOC100912618	0.252842	0.136802	0.275256	Positive
P13676	Apeh	0.252788	0.136888	0.275256	Positive
O35179	Sh3gl2	-0.252715	0.137005	0.275256	Negative
A0JN30	Cnpy2	0.252554	0.137265	0.275432	Positive
B2RZ78	Vps29	0.252489	0.137369	0.275432	Positive
D4A746	Gmppb	0.267423	0.138957	0.278334	Positive
P28818	Rasgrf1	0.251216	0.139429	0.278962	Positive
P12711	Adh5	-0.25102	0.139748	0.278962	Negative
B1WC25	Tra2a	0.271324	0.139823	0.278962	Positive
G3V6I5	Dnaja3	-0.276016	0.139832	0.278962	Negative
P15087	Cpe	0.250681	0.140303	0.27962	Positive
P81795	Eif2s3	0.249944	0.141511	0.281747	Positive
A0A0G2K737	Txnl1	0.249816	0.141722	0.281883	Positive
A0A0H2UHD9	Ncln	0.249664	0.141972	0.282065	Positive
P19511	Atp5f1	0.249588	0.142097	0.282065	Positive
P61150-2	Fgf12	-0.265074	0.142593	0.282767	Negative
F1LQD2	Camkk1	0.249158	0.142808	0.282911	Positive
A0A0H2UHS7	Rpl18	0.24904	0.143004	0.283017	Positive
A0A0G2JZ83	NA	0.248914	0.143213	0.283148	Positive
M0RC65	Cfl2	0.248787	0.143424	0.283284	Positive
P12368	Prkar2a	0.248585	0.143759	0.283663	Positive
B2GUV5	Atp6v1g1	0.247441	0.145672	0.287154	Positive
D4AC23	Cct7	0.247305	0.145902	0.287316	Positive
P97612	Faah	0.247221	0.146044	0.287316	Positive
B2RZ72	Arpc4	0.246777	0.146792	0.288502	Positive
D4AD15	Eif4g1	0.246524	0.14722	0.289021	Positive
D3ZCV0	Actn2	0.246449	0.147347	0.289021	Positive
Q920L2	Sdha	0.246164	0.14783	0.289683	Positive
Q71SY3	Tsn	0.24541	0.149115	0.291661	Positive
P24329	Tst	0.2454	0.149133	0.291661	Positive
P18418	Calr	0.245178	0.149513	0.291945	Positive
D4A4P3	LOC100361144	-0.245089	0.149664	0.291945	Negative
P62630	Eef1a1	0.245018	0.149787	0.291945	Positive
G3V9L3	Dusp3	0.244945	0.149911	0.291945	Positive
P23978	Slc6a1	0.244886	0.150013	0.291945	Positive
P10824	Gnai1	0.244672	0.150382	0.292286	Positive
F1LT41	Vti1a	-0.252012	0.150482	0.292286	Negative
F1M0J7	Prickle2	0.244454	0.150756	0.292532	Positive
P21913	Sdhb	-0.244214	0.15117	0.293048	Negative
B2GV54	Nceh1	0.243874	0.151758	0.293902	Positive
F1MAH8	Clip1	0.243477	0.152447	0.294949	Positive
Q9JJ19	Slc9a3r1	0.243343	0.15268	0.295112	Positive
A0A0H2UHX1	Rtn3	0.246617	0.153238	0.295756	Positive
D3ZZZ9	Ctnnd1	0.246543	0.153366	0.295756	Positive
Q64542-3	Atp2b4	0.242859	0.153523	0.295756	Positive
Q68FP1	Gsn	0.250158	0.153608	0.295756	Positive
Q5RJR2	Twf1	0.242501	0.15415	0.296511	Positive
F1M9Y7	Tcp11l1	0.249721	0.154352	0.296613	Positive
Q5U300	Uba1	0.242299	0.154503	0.296616	Positive
Q5XIG4	Ociad1	0.253292	0.15495	0.297187	Positive
D3ZDC0	Nlgn3	0.241897	0.155209	0.297396	Positive
P04906	Gstp1	0.241647	0.155649	0.297953	Positive
Q63560	Map6	0.241512	0.155889	0.298124	Positive
G3V852	Tln1	0.241272	0.156312	0.298646	Positive
P38983	Rpsa	0.241155	0.15652	0.298756	Positive
P06687	Atp1a3	0.241011	0.156774	0.298835	Positive
D4A0T0	Ndufb10	0.240962	0.156862	0.298835	Positive
G3V7Q6	Psmb5	0.240782	0.157181	0.299155	Positive
P11240	Cox5a	0.240187	0.158239	0.300675	Positive
P16446	Pitpna	0.240164	0.158282	0.300675	Positive
Q63362	Ndufa5	0.239947	0.15867	0.301124	Positive
Q62991	Scfd1	-0.253119	0.162181	0.307493	Negative
P62997	Tra2b	0.240934	0.163239	0.309206	Positive
B4F779	Appl2	0.240641	0.163768	0.309911	Positive
Q641Y2	Ndufs2	0.236833	0.164308	0.310637	Positive
A9UMV9	Ndufa7l	-0.236338	0.165218	0.312061	Negative
Q9WVA1	Timm8a	-0.235895	0.166034	0.313305	Negative
D3ZGE6	Cttn	0.235705	0.166386	0.313671	Positive
Q4G017	Nisch	0.235332	0.167078	0.314222	Positive
P63319	Prkcg	0.235328	0.167084	0.314222	Positive
B2RZ79	Iscu	0.242426	0.167153	0.314222	Positive
Q63803	Gnas	0.235012	0.167672	0.314606	Positive
Q4QQS3	Oscp1	-0.245953	0.167674	0.314606	Negative
A0A0G2KAL9	Mff	0.234748	0.168165	0.314967	Positive
Q05683	Gad2	0.234706	0.168243	0.314967	Positive
Q5RJL0	Ermn	-0.234653	0.168342	0.314967	Negative
Q63584	Tmed10	0.234518	0.168593	0.315141	Positive
Q6PDU7	Atp5l	0.234338	0.16893	0.315473	Positive
F1LQ26	Rapgef4	0.237674	0.169185	0.315652	Positive
Q5XI72	Eif4h	0.234013	0.169539	0.316016	Positive
A0A140TAC3	Epn1	0.233809	0.169921	0.316228	Positive
G3V949	Clip2	0.233783	0.16997	0.316228	Positive
M0R3V4	LOC501282	0.240129	0.171338	0.318473	Positive
A0A0G2K931	Psat1	0.232876	0.171681	0.318814	Positive
F1LRV4	Hspa4	0.232386	0.172611	0.320241	Positive
M0RAP5	Sbf1	0.232132	0.173093	0.320836	Positive
P36201	Crip2	0.231848	0.173634	0.321538	Positive
P15205	Map1b	0.231215	0.174845	0.32348	Positive
F1M6T6	Ppp6r2	-0.23092	0.175411	0.324224	Negative
Q5HZW3	Asphd2	0.23052	0.176181	0.325345	Positive
P63012	Rab3a	-0.230176	0.176846	0.326271	Negative
Q6P7Q2	Gpc1	0.229994	0.177198	0.326468	Positive
G3V964	Ntm	0.229883	0.177412	0.326468	Positive
P17077	Rpl9	0.229866	0.177446	0.326468	Positive
Q9Z269	Vapb	0.229682	0.177802	0.326821	Positive
G3V984	Bsn	0.229487	0.17818	0.327175	Positive
B2RYW3	Ndufb9	0.229413	0.178325	0.327175	Positive
F1M9V7	Npepps	0.229165	0.178807	0.327418	Positive
F1LV13	Hnrnpm	-0.229151	0.178836	0.327418	Negative
A0A0G2K872	Cadm3	0.229091	0.178951	0.327418	Positive
P31016	Dlg4	0.228588	0.179934	0.328913	Positive
Q9QYL8	Lypla2	0.227998	0.181092	0.330726	Positive
P62243	Rps8	-0.227717	0.181644	0.331429	Negative
Q68FQ9	Lancl2	0.227347	0.182375	0.332458	Positive
B5DFD8	Sh3bgrl	0.230345	0.183112	0.333495	Positive
Q8VHK2	Caskin1	0.22677	0.183517	0.333927	Positive
O35509	Rab11b	0.226673	0.183708	0.333942	Positive
Q6AYK6	Cacybp	0.226547	0.183959	0.333942	Positive
A0A0G2K0S7	NA	0.229877	0.184029	0.333942	Positive
P14046	A1i3	0.22629	0.184471	0.334437	Positive
D3ZWL6	Ahcyl2	0.226095	0.184859	0.334836	Positive
P62815	Atp6v1b2	-0.225769	0.185511	0.335711	Negative
P62870	Tceb2	0.2288	0.186148	0.336558	Positive
A0A140UHX6	NA	0.225291	0.186468	0.336654	Positive
P63045	Vamp2	-0.225255	0.18654	0.336654	Negative
P62824	Rab3c	0.225062	0.186929	0.337048	Positive
Q68FQ0	Cct5	0.22492	0.187214	0.337257	Positive
Q9JHZ4	Gripap1	0.224766	0.187525	0.337295	Positive
P11608	Mt-atp8	-0.228081	0.187575	0.337295	Negative
A0A0H2UHI7	Atad1	-0.224422	0.188219	0.338147	Negative
D4A404	Psd3	0.230718	0.189257	0.339705	Positive
P68511	Ywhah	0.223073	0.190958	0.342308	Positive
G3V8T5	Ruvbl2	0.223027	0.191051	0.342308	Positive
Q9R1Z0-2	Vdac3	0.222672	0.191777	0.343298	Positive
P51635	Akr1a1	0.222494	0.192142	0.343642	Positive
Q6AY65	Arfip2	-0.225491	0.192771	0.344457	Negative
F1M953	Hspa9	0.222068	0.193016	0.344585	Positive
Q5M7T6	Atp6v0d1	0.221852	0.193461	0.345068	Positive
A0A0G2K104	Kcnma1	0.23203	0.19383	0.345418	Positive
P62963	Pfn1	0.221553	0.194077	0.345547	Positive
Q6JE36	Ndrg1	-0.22474	0.194297	0.34563	Negative
B2RYW9	Fahd2	0.221307	0.194586	0.345834	Positive
Q4FZT0	Stoml2	0.220971	0.195281	0.346492	Positive
Q62717	Cadps	0.22096	0.195305	0.346492	Positive
P61972	Nutf2	0.227076	0.196534	0.348361	Positive
G3V734	Decr1	0.220176	0.196933	0.348758	Positive
Q9WVR7	Ppm1f	0.223195	0.197463	0.349384	Positive
Q9QX80	Hnrnpab	0.219366	0.198628	0.350791	Positive
G3V7T3	Pank4	0.237293	0.19867	0.350791	Positive
Q80U96	Xpo1	0.21929	0.198787	0.350791	Positive
F1LYG2	Sipa1l3	0.218999	0.199399	0.351557	Positive
A0A0G2JT63	Cyfip2	0.218144	0.201203	0.354388	Positive
A0A0G2K677	NA	0.21807	0.201361	0.354388	Positive
D4A5J1	Kbtbd11	0.216604	0.204481	0.359387	Positive
D3ZPC4	L1cam	-0.216566	0.204563	0.359387	Negative
F1M7S3	Pdyn	0.216305	0.205123	0.360052	Positive
P85108	Tubb2a	-0.215791	0.206227	0.361121	Negative
Q5BJU0	Rras2	0.246403	0.206233	0.361121	Positive
B1WC33	Cdc42ep4	-0.229558	0.206277	0.361121	Negative
P21670	Psma4	0.215381	0.207112	0.362045	Positive
E9PT29	Ddx17	0.215292	0.207304	0.362045	Positive
A0A140TAA1	NA	0.21527	0.207351	0.362045	Positive
D4AE02	Fam98b	0.232669	0.207821	0.362546	Positive
Q3MIE7	Commd9	0.228289	0.208865	0.364047	Positive
F1MAQ5	Map2	-0.217629	0.209163	0.364249	Negative
P84100	Rpl19	0.214214	0.209643	0.364764	Positive
P04785	P4hb	-0.216838	0.210865	0.366569	Negative
Q811X6	Cryl1	-0.213519	0.21116	0.366663	Negative
F1LS72	Uba2	0.213461	0.211288	0.366663	Positive
A0A0G2K0S1	Calcoco1	0.216036	0.212598	0.368614	Positive
Q01066	Pde1b	0.211856	0.214822	0.372146	Positive
A0A0G2K9N0	Smap2	0.23682	0.216122	0.374034	Positive
P70566	Tmod2	-0.211167	0.216352	0.374034	Negative
Q5XIJ3	Idh3g	0.211111	0.216476	0.374034	Positive
D4ABT8	Hnrnpul2	0.21098	0.216768	0.374212	Positive
F1MAA7	Lamc1	0.21375	0.217595	0.37499	Positive
D3ZF26	Tnks1bp1	0.210609	0.217596	0.37499	Positive
Q924S1	Agpat4	-0.21676	0.218194	0.375694	Negative
A0A096MIZ1	Palm2	0.210218	0.218473	0.375828	Positive
Q6PDV6	Rps14	-0.213273	0.21865	0.375828	Negative
F1LRZ7	Nefh	-0.210046	0.218859	0.375862	Negative
F1LP82	Rab2a	0.209305	0.220525	0.378396	Positive
Q08877-9	Dnm3	0.208647	0.222012	0.38062	Positive
O08836	Igbp1	0.214833	0.222414	0.380979	Positive
D4AD82	Arhgap35	0.208134	0.223177	0.381957	Positive
A0A0A0MY31	Itpr1	0.207824	0.223881	0.382832	Positive
P59215	Gnao1	-0.207685	0.224198	0.383045	Negative
O88917-2	Lphn1	0.207558	0.224488	0.38321	Positive
B0BNB9	Htra2	0.217076	0.224954	0.383676	Positive
D3ZNQ6	Ube2m	-0.206883	0.226033	0.385186	Negative
D3ZS72	Prex1	0.219614	0.227159	0.386773	Positive
Q6P4Z9	Cops8	0.206209	0.227582	0.387163	Positive
P23358	Rpl12	-0.205353	0.22956	0.390023	Negative
D3ZBM3	Fech	-0.205312	0.229657	0.390023	Negative
Q9ET64	Smpd2	0.211144	0.230647	0.39107	Positive
G3V849	Dlgap1	0.204836	0.230762	0.39107	Positive
Q9ES21	Sacm1l	0.204792	0.230863	0.39107	Positive
P61265	Stx1b	0.204602	0.231307	0.391487	Positive
Q5M7A7	Cnrip1	-0.204487	0.231574	0.391607	Negative
Q06486	Csnk1d	0.204148	0.232365	0.392609	Positive
P39052-4	Dnm2	0.203984	0.232749	0.392925	Positive
F7F2F3	NA	0.203618	0.233605	0.393648	Positive
Q63041	A1m	0.224107	0.233833	0.393648	Positive
P0DP31	Calm2	0.203498	0.233889	0.393648	Positive
Q5YLM1	Dagla	0.213011	0.23397	0.393648	Positive
F8WFR6	Gyg1	-0.209531	0.234312	0.393868	Negative
O55173	Pdpk1	-0.203239	0.234497	0.393868	Negative
O89049	Txnrd1	0.203123	0.23477	0.393994	Positive
F1LML7	Hip1r	0.202974	0.23512	0.394248	Positive
D3ZCI0	Gk	0.211657	0.237028	0.397112	Positive
P63164	Snrpn	-0.201979	0.237471	0.39752	Negative
B0BN46	Grhpr	0.22232	0.237681	0.397536	Positive
Q08163	Cap1	0.201706	0.23812	0.397935	Positive
P37996	Arl3	-0.201604	0.238362	0.398004	Negative
P49088	Asns	0.204416	0.238834	0.398457	Positive
B2GUZ9	Fam49b	0.201063	0.239653	0.399269	Positive
G3V8V1	Grn	-0.201034	0.239722	0.399269	Negative
A0A0H2UHL9	Dbn1	0.200385	0.241274	0.401518	Positive
G3V774	Fbxo2	-0.200175	0.241777	0.402018	Negative
Q5XI73	Arhgdia	0.199919	0.242392	0.402704	Positive
D4A4W6	Slirp	-0.199462	0.243492	0.404192	Negative
Q5M9H4	Atp1b2	-0.199372	0.243711	0.404218	Negative
P16617	Pgk1	0.199031	0.244535	0.405085	Positive
Q8VHK7	Hdgf	0.215351	0.244641	0.405085	Positive
Q63327-2	Mobp	0.201829	0.244958	0.405272	Positive
B0BN85	Sugt1	0.1986	0.245577	0.405958	Positive
P61983	Ywhag	0.19804	0.24694	0.407633	Positive
B0BNA7	Eif3i	0.198015	0.247001	0.407633	Positive
Q6DGG0	Ppid	0.197846	0.247412	0.407973	Positive
P15650	Acadl	-0.19759	0.248037	0.408557	Negative
D3ZAA9	Mpp2	0.197453	0.248372	0.408557	Positive
Q78P75	Dynll2	0.197335	0.248658	0.408557	Positive
G3V881	Lingo1	0.20334	0.248741	0.408557	Positive
Q6AZ35	Dync1i2	0.19728	0.248794	0.408557	Positive
Q8K4Y5	Lgi1	0.197094	0.249248	0.408888	Positive
P02091	Hbb	0.19703	0.249407	0.408888	Positive
P19945	Rplp0	0.196679	0.250268	0.409961	Positive
F1MA97	Thsd7a	-0.199029	0.251704	0.411916	Negative
P45592	Cfl1	0.196026	0.251876	0.411916	Positive
A0A0G2K8T0	Asah1	0.204506	0.253615	0.414418	Positive
A0A0G2JU89	Ubr4	0.200672	0.255136	0.416562	Positive
P25093	Fah	-0.194387	0.25594	0.417531	Negative
P62775	Mtpn	0.194116	0.256617	0.418292	Positive
P61203	Cops2	0.193752	0.257528	0.419434	Positive
A1L108	Arpc5l	-0.192699	0.260174	0.423395	Negative
D4A4T9	Chordc1	0.195401	0.260628	0.423787	Positive
O35142	Copb2	0.197512	0.262852	0.427053	Positive
P63086	Mapk1	0.191272	0.263786	0.428222	Positive
D3ZE85	Frrs1l	-0.191129	0.264151	0.428463	Negative
P19643	Maob	0.190854	0.264852	0.429085	Positive
P62762	Vsnl1	0.190809	0.264966	0.429085	Positive
Q5XIC0	Eci2	-0.19039	0.266036	0.430468	Negative
P17105	Itpka	0.189862	0.267389	0.43212	Positive
P0DJJ3	Sgip1	0.189822	0.267493	0.43212	Positive
Q00981	Uchl1	0.189223	0.269034	0.434257	Positive
D3ZD97	Dhx15	0.18913	0.269274	0.434291	Positive
P10111	Ppia	-0.188787	0.270158	0.435363	Negative
F7EYB9	Omg	-0.188678	0.27044	0.435465	Negative
P00507	Got2	0.188284	0.271461	0.436756	Positive
Q5PQN0	Ncald	0.187204	0.274269	0.440782	Positive
Q3T1J1	Eif5a	0.187059	0.274649	0.440782	Positive
Q63768	Crk	0.195735	0.274984	0.440782	Positive
G3V6D3	Atp5b	0.186929	0.274989	0.440782	Positive
P38718	Mpc2	0.186896	0.275073	0.440782	Positive
Q9Z327-3	Synpo	0.186467	0.276197	0.441892	Positive
P63322	Rala	-0.189257	0.27621	0.441892	Negative
Q9Z2X5	Homer3	-0.186136	0.277066	0.442904	Negative
Q4V7A0	Wdr61	0.188373	0.278499	0.444838	Positive
G3V6P2	Dlst	0.185176	0.279594	0.4459	Positive
P08461	Dlat	0.185169	0.279613	0.4459	Positive
P20788	Uqcrfs1	-0.184821	0.280535	0.447011	Negative
Q642E2	LOC100362069	-0.184176	0.282247	0.449089	Negative
Q64428	Hadha	0.184159	0.282291	0.449089	Positive
Q5U3Y8	Btf3	0.18679	0.282633	0.449273	Positive
Q6AYT3	Rtcb	-0.18358	0.283834	0.450479	Negative
F1M4I4	Vps51	0.198725	0.283845	0.450479	Positive
P21575	Dnm1	0.183131	0.285033	0.452004	Positive
F1M6X3	Kcnq2	-0.194785	0.285382	0.452197	Negative
F1LYQ8	Farp1	0.182654	0.286312	0.453309	Positive
P09895	Rpl5	0.18251	0.286697	0.453325	Positive
M0RBJ7	C3	0.18521	0.286798	0.453325	Positive
Q6P3V8	Eif4a1	0.182395	0.287007	0.453325	Positive
Q4V7D2	Rogdi	0.181919	0.288288	0.454986	Positive
A0A5H1ZRV8	Camsap2	0.181763	0.288707	0.455287	Positive
Q6MFY6	Ppp1r11	0.181499	0.28942	0.455934	Positive
P63041	Cplx1	-0.181428	0.289612	0.455934	Negative
G3V9Z3	Maoa	0.181357	0.289806	0.455934	Positive
P62142	Ppp1cb	-0.18119	0.290258	0.456284	Negative
P31424	Grm5	0.180787	0.29135	0.457638	Positive
Q3S4A5	Arfgap1	-0.180628	0.291782	0.457954	Negative
B5DFN2	Ahcyl1	0.180467	0.292218	0.458276	Positive
A0A1B0GWU2	Elavl2	0.191675	0.293295	0.459603	Positive
E9PSK7	Mapk8ip3	0.179874	0.293835	0.460087	Positive
P29314	Rps9	0.179583	0.29463	0.460969	Positive
A0A0H2UHE1	Suclg1	0.179206	0.295661	0.46186	Positive
F1LV89	Rap1gap	-0.179204	0.295665	0.46186	Negative
Q3B8N9	Bphl	-0.178995	0.29624	0.462079	Negative
P13668	Stmn1	0.178913	0.296464	0.462079	Positive
F1M6A8	Akt3	-0.178818	0.296724	0.462079	Negative
B2GUZ5	Capza1	-0.178814	0.296736	0.462079	Negative
F7EMB2	RGD1304704	0.177615	0.300041	0.46686	Positive
P10362	Scg2	-0.177403	0.300627	0.467407	Negative
P53678	Ap3m2	0.177057	0.301586	0.468531	Positive
F1LVR4	Camk1d	0.187934	0.302995	0.470352	Positive
Q157S1	Crtc1	-0.18458	0.303801	0.471174	Negative
F1MAR6	Prodh	0.184506	0.303999	0.471174	Positive
Q6IMY8	Hnrnpu	0.175848	0.304951	0.472282	Positive
P62755	Rps6	-0.174929	0.307525	0.475898	Negative
Q63065	Pdk1	0.182724	0.308775	0.477459	Positive
P68403-2	Prkcb	0.174381	0.309067	0.47754	Positive
P31044	Pebp1	-0.174217	0.309531	0.477885	Negative
P10960	Psap	0.17389	0.310453	0.478636	Positive
P63142	Kcna2	0.176449	0.310601	0.478636	Positive
Q5XII9	Mtfr1l	0.173788	0.31074	0.478636	Positive
B2RYN1	Fn3krp	0.173481	0.31161	0.479604	Positive
O88794	Pnpo	-0.173292	0.312146	0.480057	Negative
Q9Z0G8	Wipf3	-0.173015	0.312931	0.480638	Negative
G3V7I0	Prdx3	0.172932	0.313167	0.480638	Positive
M0RAK2	LOC684270	0.172903	0.313249	0.480638	Positive
Q63396	Sub1	0.175407	0.313514	0.480673	Positive
P37397	Cnn3	-0.186542	0.314996	0.482199	Negative
G3V6I9	Rpl26	-0.17224	0.315137	0.482199	Negative
Q8VIL3	Zwint	-0.172205	0.315237	0.482199	Negative
D3ZBU7	RGD1310819	0.172059	0.315655	0.482466	Positive
D3ZAG3	Map9	-0.171603	0.316958	0.484085	Negative
D3ZQD3	Ogdhl	0.171392	0.317562	0.484522	Positive
D4A6H8	Ctnna2	-0.171301	0.317822	0.484522	Negative
P08009	Gstm3	0.171248	0.317975	0.484522	Positive
E9PU01	Chd4	0.173135	0.319921	0.487114	Positive
G3V6S2	Aco1	0.170361	0.320526	0.487639	Positive
Q6AXQ0	Sae1	-0.178303	0.320825	0.487639	Negative
P12007	Ivd	0.170196	0.321003	0.487639	Positive
P06761	Hspa5	-0.169836	0.322041	0.488842	Negative
Q63881	Kcnd2	-0.171906	0.323421	0.490383	Negative
G3V9B3	Mag	0.169315	0.323549	0.490383	Positive
D4A1G8	Cep170b	0.169161	0.323997	0.490687	Positive
D3ZIE9	Aldh18a1	0.168681	0.325393	0.492058	Positive
Q5XIF3	Ndufs4	-0.168673	0.325416	0.492058	Negative
D4A781	Ipo5	0.168594	0.325645	0.492058	Positive
D3ZC89	Fam114a2	0.168474	0.325995	0.492213	Positive
P68101	Eif2s1	0.16831	0.326471	0.492557	Positive
A0A0H2UHB7	Slc4a4	0.167403	0.329123	0.49607	Positive
Q5EBD0	Sec14l2	0.167344	0.329298	0.49607	Positive
P24368	Ppib	0.169355	0.330761	0.497895	Positive
O88954	Mpp3	0.166568	0.331577	0.498746	Positive
A0A0G2K4A0	NA	-0.166311	0.332333	0.499505	Negative
D4A5L9	LOC679794	-0.166205	0.332648	0.4996	Negative
P69682	Necap1	0.165441	0.334905	0.502484	Positive
Q4V8H5	Dnpep	0.165352	0.33517	0.502484	Positive
Q6AXR6	Gsto1	0.165299	0.335326	0.502484	Positive
A0A0G2K761	Cul2	0.167452	0.336303	0.503188	Positive
D4A435	Icam5	-0.16497	0.336303	0.503188	Negative
M0RBS9	Snx27	0.164763	0.336918	0.503456	Positive
F1M0Z3	Cpne4	0.164739	0.336989	0.503456	Positive
D4ACG7	Cpne6	-0.164383	0.33805	0.504662	Negative
D3ZGS3	Ocrl	-0.184351	0.3384	0.504805	Negative
A0A0G2JXG3	Tmem30a	0.16399	0.339222	0.505652	Positive
P63259	Actg1	-0.163847	0.339648	0.505907	Negative
Q6AYI1	Ddx5	0.162882	0.34254	0.509833	Positive
Q9JHY2	Sfxn3	-0.162764	0.342893	0.509976	Negative
F1LU71	Auh	0.162321	0.344225	0.511288	Positive
G3V9W6	Aldh3a2	0.1623	0.34429	0.511288	Positive
Q5EB62	Slc25a46	0.169859	0.344642	0.511429	Positive
O08773	Rgs14	0.16702	0.345112	0.511744	Positive
Q63372-13	Nrxn1	0.164376	0.345382	0.511763	Positive
B5DFG5	Sept6	0.161726	0.346022	0.512329	Positive
A0A0G2K1I6	Scamp1	0.161397	0.347016	0.513418	Positive
F1M787	Ctnnd2	0.16037	0.350133	0.517645	Positive
P84079	Arf1	0.159782	0.351927	0.519699	Positive
A0A0G2K7R8	Slc44a1	0.159743	0.352046	0.519699	Positive
P70600	Ptk2b	0.159131	0.35392	0.521831	Positive
Q5PPJ9	Sh3glb2	-0.159099	0.354015	0.521831	Negative
A0A0G2K724	Mcts1	0.17207	0.354651	0.522112	Positive
D3ZXF9	Mrpl12	0.166389	0.354731	0.522112	Positive
P18163	Acsl1	0.16116	0.355031	0.522166	Positive
Q09167	Srsf5	0.158608	0.355523	0.522503	Positive
F1LMW7	Marcks	0.158242	0.356649	0.523771	Positive
A0A0G2K9Q7	Map1lc3b	0.160417	0.357282	0.524313	Positive
G3V7G9	Eif3l	0.157853	0.357847	0.524754	Positive
B0BNJ1	Sri	0.157514	0.358894	0.525819	Positive
P04775	Scn2a	0.157446	0.359103	0.525819	Positive
Q9Z1B2	Gstm5	0.157206	0.359845	0.526518	Positive
B2RYS2	LOC685596	0.157034	0.360378	0.526568	Positive
F1M4K6	Lrrc7	0.157024	0.360409	0.526568	Positive
F1LNF0	Myh14	-0.167013	0.360917	0.526923	Negative
P11951	Cox6c2	0.156552	0.361874	0.527788	Positive
D4AA63	Ubqln2	-0.156498	0.362041	0.527788	Negative
M0RC17	Chl1	0.156342	0.362526	0.527868	Positive
F1M853	Rrbp1	0.156271	0.362747	0.527868	Positive
A0A0G2JWM2	Sirt2	0.156015	0.363543	0.527868	Positive
A0A0G2KB98	Gsk3b	-0.156013	0.36355	0.527868	Negative
A0A0G2JY22	NA	0.158346	0.363607	0.527868	Positive
B2DD29	Brsk1	0.155963	0.363703	0.527868	Positive
P17425	Hmgcs1	0.158218	0.363997	0.527868	Positive
G3V6Q3	Wdr13	0.155772	0.3643	0.527868	Positive
P60711	Actb	0.155712	0.364487	0.527868	Positive
A0A0G2K3C1	Cdc37	0.155558	0.364968	0.528181	Positive
D3ZVR7	Fam213b	0.157718	0.365535	0.528429	Positive
B2RZ37	Reep5	0.155332	0.365672	0.528429	Positive
Q6P3V9	Rpl4	0.155192	0.366109	0.528676	Positive
P62074	Timm10	-0.155073	0.366483	0.528832	Negative
D4AEP0	Adss	0.154816	0.367289	0.529212	Positive
A0A0G2JUI3	Dlgap2	0.157108	0.367417	0.529212	Positive
Q5RKG9	Eif4b	0.154734	0.367545	0.529212	Positive
Q62829	Pak3	-0.154416	0.368541	0.530102	Negative
A0A0G2K4B0	Gprc5b	0.154367	0.368697	0.530102	Positive
P11884	Aldh2	-0.154163	0.369336	0.530637	Negative
Q62952	Dpysl3	-0.153887	0.370205	0.5315	Negative
Q4QQV4	Hars	0.153725	0.370714	0.531848	Positive
Q5XI77	Anxa11	0.153357	0.371873	0.532455	Positive
G3V7I8	Slk	-0.153267	0.372159	0.532455	Negative
Q6P747	Hp1bp3	0.15323	0.372276	0.532455	Positive
F1M8A4	Ppfia2	0.153173	0.372454	0.532455	Positive
D4AEI5	Myef2	0.153166	0.372478	0.532455	Positive
P27867	Sord	0.154624	0.375134	0.535867	Positive
Q9WV63	Kif2a	0.151156	0.378858	0.540747	Positive
P60881	Snap25	-0.150966	0.379467	0.540747	Negative
A0A0G2K0X9	Sec31a	0.150918	0.37962	0.540747	Positive
B1WC61	Acad9	0.150867	0.379782	0.540747	Positive
M0RBJ0	Gng2	0.155483	0.379911	0.540747	Positive
Q9WV48-3	Shank1	0.15066	0.380445	0.54112	Positive
D4ABS5	Pithd1	0.150561	0.380762	0.541183	Positive
Q3B8Q2	Eif4a3	-0.150144	0.382096	0.542691	Negative
Q9Z272	Git1	-0.149969	0.382657	0.5431	Negative
O70593	Sgta	0.152044	0.383252	0.543556	Positive
F1LN92	Afg3l2	0.148549	0.38723	0.548806	Positive
O55166	Vps52	-0.147882	0.389389	0.551472	Negative
P13852	Prnp	0.147722	0.389908	0.551814	Positive
P30904	Mif	-0.147605	0.390287	0.551958	Negative
M0RBL8	Tceal6	0.147286	0.391326	0.553033	Positive
A0A0G2K398	Gpx4	0.154008	0.392153	0.553808	Positive
P63170	Dynll1	0.146336	0.39442	0.556613	Positive
A0A0G2K6T9	NA	0.146058	0.395329	0.557501	Positive
P84076	Hpca	0.145673	0.396591	0.558884	Positive
A0A0G2JZK7	Slc8a2	0.145408	0.39746	0.559711	Positive
A0A0G2K2S2	Slc2a1	-0.144266	0.401216	0.564313	Negative
G3V7S0	Folh1	0.144215	0.401385	0.564313	Positive
F7FKI5	Pdha1	0.144156	0.40158	0.564313	Positive
M0RC99	Rab5a	-0.150222	0.404035	0.567362	Negative
P21531	Rpl3	0.143315	0.404361	0.567419	Positive
Q6PDW2	LOC100360604	-0.143101	0.405068	0.56801	Negative
F1M7V4	Pclo	0.151922	0.406514	0.569168	Positive
A0A0G2K7J0	Acsbg1	0.142598	0.406738	0.569168	Positive
G3V940	Coro1b	0.142565	0.406848	0.569168	Positive
D4A2F1	Agrn	-0.142494	0.407085	0.569168	Negative
Q641Y0	Ddost	0.149185	0.407326	0.569168	Positive
D4A1J6	Ankfy1	-0.144184	0.408602	0.570549	Negative
F1LS86	Iars	-0.143129	0.412074	0.574994	Negative
A0A0G2K8R3	NA	0.145123	0.412841	0.575659	Positive
Q5PQZ9	Ndufc2	0.140253	0.41458	0.577679	Positive
G3V714	Scg5	0.139765	0.41622	0.579558	Positive
Q6P136	Hyou1	0.139476	0.417195	0.58016	Positive
P07825	Syp	-0.139463	0.417237	0.58016	Negative
Q68FX1	Mpi	0.139215	0.418075	0.580747	Positive
B5DF65	Blvrb	0.139165	0.418243	0.580747	Positive
O08557	Ddah1	0.13895	0.418969	0.581349	Positive
A0A0G2K5L2	LOC100911440	0.138365	0.420951	0.583691	Positive
F1LR18	Arhgap39	-0.138189	0.421549	0.584113	Negative
Q9QUR2-2	Dctn4	-0.138018	0.422127	0.584506	Negative
P11661	Mtnd5	0.137767	0.422981	0.585136	Positive
P62718	Rpl18a	-0.137711	0.423171	0.585136	Negative
F1M9N7	Agfg1	-0.14182	0.423669	0.585282	Negative
P41499-1	Ptpn11	-0.137507	0.423866	0.585282	Negative
F1LTW9	Efr3b	0.137416	0.424176	0.585304	Positive
Q6AYR2	Ndrg3	0.13725	0.424741	0.585676	Positive
Q5U2V8	Emc3	0.13716	0.425046	0.58569	Positive
F1M964	Pmpca	-0.1389	0.426165	0.586501	Negative
Q02356	Ampd2	0.136815	0.426224	0.586501	Positive
A0A0G2JYC6	Ubap2l	0.138675	0.426922	0.587055	Positive
M0RDX2	Aplp2	-0.145314	0.427463	0.587089	Negative
Q62768	Unc13a	0.13643	0.427538	0.587089	Positive
F1M978	Impa1	-0.136322	0.427908	0.587192	Negative
P17078	Rpl35	-0.135918	0.429291	0.588682	Negative
D3ZKQ4	Rabl6	0.141997	0.430542	0.589991	Positive
P20651	Ppp3cb	-0.13515	0.431929	0.591484	Negative
A0A0G2JUT1	Cadm1	0.13501	0.432409	0.591733	Positive
A0A0H2UHH9	LOC100363469	0.134868	0.432897	0.591994	Positive
Q6AYQ8	Fahd1	-0.13477	0.433234	0.592047	Negative
D3ZT47	Fam171a2	-0.134487	0.43421	0.592493	Negative
M3ZCQ2	Snrnp200	-0.136398	0.434626	0.592493	Negative
Q920Q0	Palm	0.134357	0.43466	0.592493	Positive
D3ZPT0	Prr36	0.134176	0.435283	0.592493	Positive
A0A0G2KAS7	Slc1a3	0.134173	0.435294	0.592493	Positive
Q6P502	Cct3	0.134157	0.43535	0.592493	Positive
P18484	Ap2a2	0.133969	0.436	0.592972	Positive
Q6PDV8	Rpl22	-0.133803	0.436572	0.593344	Negative
D3ZSY8	Tbc1d10b	0.133587	0.437322	0.593957	Positive
P10888	Cox4i1	-0.133481	0.437688	0.594048	Negative
D4A3D4	Abhd3	-0.137432	0.438297	0.59416	Negative
A0JPJ7	Ola1	-0.133284	0.438369	0.59416	Negative
F1SW39	Psip1	0.133018	0.439293	0.594554	Positive
O70196	Prep	-0.132941	0.439561	0.594554	Negative
B1H2A2	Fsd1	-0.139223	0.439692	0.594554	Negative
D3ZP47	Phpt1	-0.132856	0.439856	0.594554	Negative
D4A831	Adgrb3	0.134353	0.441612	0.596521	Positive
A0A0G2JWK6	NA	0.140417	0.443364	0.598302	Positive
F1M7W7	Nae1	0.135881	0.443532	0.598302	Positive
P37377	Snca	-0.131308	0.445251	0.600212	Negative
P37361	Mt3	-0.130773	0.447124	0.602329	Negative
Q5U302	Ctnna1	0.130249	0.448961	0.604394	Positive
Q9ESH6	Glrx	-0.129924	0.450105	0.605122	Negative
A0A0G2K293	Negr1	-0.129922	0.450111	0.605122	Negative
D4ABI7	LOC100365676	-0.129452	0.451767	0.606886	Negative
G3V9G3	Camk2b	0.129376	0.452034	0.606886	Positive
D4A2G9	Ranbp1	0.129249	0.452481	0.607076	Positive
Q63413	Ddx39b	0.128089	0.456581	0.612164	Positive
D3ZAI6	Nt5dc3	0.12796	0.457041	0.612367	Positive
F1LMS1	Cacna1e	-0.127844	0.45745	0.612502	Negative
B1WC16	Bclaf1	-0.129535	0.458306	0.613235	Negative
D4A565	Ndufb5	0.127092	0.460125	0.615037	Positive
Q9WVE9	Itsn1	0.126985	0.460505	0.615037	Positive
P21533	Rpl6	0.126964	0.460581	0.615037	Positive
D3ZW15	Sec24b	0.130593	0.461634	0.616029	Positive
P18395	Csde1	0.125563	0.465583	0.620882	Positive
Q7TQ77	Hook3	-0.133283	0.467091	0.622242	Negative
F1M4R7	Cspg5	0.125104	0.467229	0.622242	Positive
G3V982	Elmo2	-0.124261	0.470257	0.625705	Negative
Q641Z6	Ehd1	-0.12419	0.470515	0.625705	Negative
Q4KMA2	Rad23b	0.127965	0.470775	0.625705	Positive
F1LXA0	Ndufa12	0.123583	0.472702	0.627353	Positive
A0A0G2JZB8	NA	0.123559	0.472789	0.627353	Positive
Q4V7C6	Gmps	0.125358	0.473045	0.627353	Positive
P62919	Rpl8	-0.123424	0.473277	0.627353	Negative
A0A140TAB3	Klc1	0.122847	0.475365	0.629131	Positive
P62845	Rps15	0.124698	0.475398	0.629131	Positive
F1LSW7	Rpl14	-0.12279	0.475569	0.629131	Negative
P04550	Ptms	-0.122322	0.477268	0.630781	Negative
F1LPG9	Fam21c	0.124095	0.477552	0.630781	Positive
A0A0A0MXU2	Coro7	-0.122184	0.477769	0.630781	Negative
Q80Z29	Nampt	0.125608	0.479052	0.632056	Positive
P21571	Atp5j	-0.121743	0.47937	0.632056	Negative
Q4QQV8	Chmp5	0.124799	0.48191	0.634984	Positive
B2GV73	Arpc3	0.120931	0.482329	0.635114	Positive
P62944	Ap2b1	0.120746	0.483003	0.635329	Positive
A0A0G2K2B3	Khsrp	-0.120711	0.483131	0.635329	Negative
P26431	Slc9a1	-0.122186	0.484403	0.6362	Negative
D4ABK7	Hnrnph3	-0.124043	0.484588	0.6362	Negative
B0BN94	Fam136a	-0.123996	0.484755	0.6362	Negative
Q99MZ8	Lasp1	-0.120148	0.485187	0.636348	Negative
O08838	Amph	0.119997	0.485741	0.636654	Positive
M0R735	Syncrip	0.119574	0.487293	0.638259	Positive
Q4KM65	Nudt21	0.134213	0.487608	0.638259	Positive
O88871	Gabbr2	0.119314	0.488244	0.638671	Positive
P50408	Atp6v1f	-0.120824	0.489324	0.639399	Negative
F1LP59	Rab3gap1	0.118959	0.489552	0.639399	Positive
Q9JJ54-3	Hnrnpd	0.1189	0.489766	0.639399	Positive
Q5EB77	Rab18	0.118323	0.491893	0.641408	Positive
P83941	Tceb1	-0.118307	0.491951	0.641408	Negative
Q02563	Sv2a	0.117863	0.49359	0.642384	Positive
D3ZAF6	Atp5j2	-0.117854	0.493621	0.642384	Negative
P35815	Ppm1b	0.119627	0.493669	0.642384	Positive
Q9QUL6	Nsf	0.117486	0.494983	0.643672	Positive
P31399	Atp5h	0.117347	0.495497	0.643919	Positive
Q5U318	Pea15	0.117098	0.496417	0.644694	Positive
P04642	Ldha	0.116845	0.497353	0.645487	Positive
P85845	Fscn1	0.11648	0.498709	0.646787	Positive
Q5U1W6	Apool	0.11999	0.499082	0.646787	Positive
A2VCX1	Tiprl	0.11805	0.499422	0.646787	Positive
D4A9L2	Srsf1	0.116154	0.499918	0.646787	Positive
Q3T1K5	Capza2	-0.116137	0.499983	0.646787	Negative
P35280	Rab8a	0.121407	0.500926	0.647548	Positive
P41123	Rpl13	-0.115706	0.501587	0.647548	Negative
O88989	Mdh1	-0.115598	0.501987	0.647548	Negative
Q6MFX9	Mog	0.115561	0.502123	0.647548	Positive
Q62703	Rcn2	0.115502	0.502344	0.647548	Positive
Q99MI7	Uba3	-0.117131	0.502792	0.647548	Negative
D3ZUX5	Chchd3	0.115366	0.502852	0.647548	Positive
G3V6V1	Rnpep	0.115216	0.50341	0.647847	Positive
A0A0H2UHZ1	Aqp4	0.12055	0.503976	0.648155	Positive
Q5U2T9	Fkbp5	0.116608	0.504714	0.648684	Positive
Q66HF1	Ndufs1	-0.114688	0.505383	0.648721	Negative
P13234	Camk4	-0.116423	0.505395	0.648721	Negative
F1LPK7	Pls3	-0.11734	0.508676	0.651707	Negative
Q7TQ70	Fga	0.119207	0.508771	0.651707	Positive
D3ZLL8	LOC691716	0.113754	0.508876	0.651707	Positive
D4ACB8	Cct8	0.113712	0.509034	0.651707	Positive
D3ZD73	Ddx6	0.115056	0.510442	0.65309	Positive
M0RBF0	Safb	-0.118257	0.512179	0.65489	Negative
P08082	Cltb	0.112728	0.512732	0.65516	Positive
A0A0G2K654	NA	0.112644	0.51305	0.65516	Positive
Q6MGC4	Pfdn6	-0.112515	0.513536	0.65536	Negative
P32736-2	Opcml	0.112369	0.514085	0.65564	Positive
F1LPV8	Suclg2	0.113846	0.514926	0.656039	Positive
P23565	Ina	-0.112111	0.515059	0.656039	Negative
Q4AE70-3	Carm1	0.114793	0.517981	0.659339	Positive
F1LMZ8	Psmd11	0.110906	0.519611	0.66089	Positive
P01830	Thy1	0.11084	0.519864	0.66089	Positive
Q9R0I8	Pip4k2a	-0.111648	0.523126	0.664611	Negative
P54900	Scn2b	0.109313	0.525664	0.667409	Positive
P84586	Rbmxrtl	-0.108795	0.52764	0.669489	Negative
Q02253	Aldh6a1	0.108338	0.529388	0.671278	Positive
P07335	Ckb	0.108182	0.529982	0.671604	Positive
A0A1W2Q627	Eif4e	-0.108023	0.530591	0.671946	Negative
P54645	Prkaa1	0.107875	0.531158	0.672236	Positive
Q62888-2	Nlgn2	0.10929	0.531994	0.672831	Positive
P62024	Phactr1	0.107576	0.532305	0.672831	Positive
G3V7T8	Dlgap3	0.108744	0.534061	0.674621	Positive
A0A0G2K5V4	NA	0.10817	0.536231	0.676756	Positive
Q9QY17-2	Pacsin2	0.106501	0.536432	0.676756	Positive
P49620	Dgkg	-0.111077	0.538296	0.678265	Negative
Q505J8	Farsa	0.112852	0.538584	0.678265	Positive
A0A0G2K2M9	NA	-0.107487	0.538825	0.678265	Negative
A0A140TAI6	LOC100361060	-0.105836	0.538993	0.678265	Negative
Q6AZ50	Atg3	0.107343	0.539372	0.678311	Positive
P32551	Uqcrc2	0.105565	0.540039	0.678644	Positive
A0A0G2JWA3	Xpo7	-0.105493	0.54032	0.678644	Negative
Q06647	Atp5o	-0.10517	0.541565	0.679779	Negative
B5DFI9	Pdk3	0.105048	0.542036	0.679941	Positive
A0A5H1ZRU5	Necab2	0.104732	0.543259	0.681045	Positive
P12075	Cox5b	0.104361	0.544698	0.682182	Positive
A0A0G2JTL4	Kit	-0.105904	0.544853	0.682182	Negative
F1M7X3	Cdh13	-0.104052	0.545894	0.682923	Negative
Q3B8P4	Dcps	-0.103991	0.546133	0.682923	Negative
Q66H80	Arcn1	0.10379	0.546914	0.683471	Positive
Q52KS1	Pfkm	0.103583	0.547718	0.684045	Positive
Q99ML5	Pcyox1	0.103409	0.548392	0.684457	Positive
F1M7K7	Cacng8	0.103155	0.549382	0.685261	Positive
P15865	Hist1h1e	-0.102951	0.550177	0.685646	Negative
D3ZK97	H3f3c	-0.102898	0.55038	0.685646	Negative
P04636	Mdh2	-0.102679	0.551237	0.686283	Negative
D4A0A1	Soga3	0.102305	0.552694	0.687311	Positive
D3ZBN0	Hist1h1b	-0.102289	0.552755	0.687311	Negative
F1M403	Ube2o	-0.101836	0.554528	0.689085	Negative
F1LXQ7	Arhgap21	-0.103231	0.555109	0.689377	Negative
P49803	Rgs7	-0.101593	0.555477	0.689403	Negative
E9PT53	Wfs1	0.106204	0.556371	0.69008	Positive
P19490	Gria1	0.101139	0.557251	0.690741	Positive
B2RZ27	Sh3bgrl3	0.100715	0.558915	0.692371	Positive
A0A0G2JTB2	Gbe1	0.101625	0.561313	0.694909	Positive
D4A208	Srgap2	0.101409	0.56215	0.695512	Positive
P60901	Psma6	-0.0991753	0.564971	0.698494	Negative
D4A559	Dmtn	0.0990272	0.565555	0.698494	Positive
P47819	Gfap	-0.0990121	0.565615	0.698494	Negative
Q3ZBA0	Tecpr1	-0.0989198	0.565979	0.69851	Negative
P19468	Gclc	0.105106	0.566981	0.699312	Positive
F1M392	Limch1	0.0978592	0.570171	0.70281	Positive
A0A0G2JTW1	NA	0.0991445	0.570956	0.703233	Positive
G3V6P8	Gng12	0.100629	0.571222	0.703233	Positive
Q5XIE6	Hibch	0.0973659	0.572126	0.703787	Positive
Z4YNP1	Celf2	0.0973018	0.57238	0.703787	Positive
B1WBS4	Vps26b	0.098629	0.57297	0.704076	Positive
P06302	Ptma	0.0969753	0.573676	0.704508	Positive
D3ZBE5	Nek7	0.102288	0.577478	0.708739	Positive
D3ZC84	Usp9x	0.0956378	0.578997	0.710165	Positive
Q63525	Nudc	0.09541	0.579906	0.710694	Positive
P63047	Sult4a1	-0.0967991	0.580143	0.710694	Negative
F1M7L9	NA	-0.0964188	0.58164	0.712087	Negative
Q794E4	Hnrnpf	0.0939433	0.585771	0.716703	Positive
G3V8B6	Psmd1	0.0936069	0.587119	0.71714	Positive
B1WBY1	Cul1	-0.093593	0.587175	0.71714	Negative
Q5FVM6	Mtmr12	0.0935498	0.587349	0.71714	Positive
A0A0G2JTH4	Cd47	-0.0934944	0.587571	0.71714	Negative
P62959	Hint1	-0.0925251	0.591467	0.721451	Negative
Q792I0	Lin7c	-0.100121	0.592032	0.721698	Negative
G3V6L9	Fkbp3	0.0918916	0.594019	0.723676	Positive
P54287	Cacnb3	0.091556	0.595372	0.724881	Positive
D3ZZR9	Fkbp2	-0.0956292	0.59654	0.725858	Negative
Q1M168	Atcay	0.0899414	0.601905	0.731595	Positive
D3ZJ01	RGD1307235	0.0899201	0.601992	0.731595	Positive
A0A0G2JT30	Mat2b	0.0892619	0.604664	0.734393	Positive
F1MA98	Tpr	0.0886442	0.607176	0.736994	Positive
B0BMW0	Rab14	0.0883563	0.608348	0.737966	Positive
Q5U2X6	Ccdc47	0.0879653	0.609942	0.739448	Positive
P00388	Por	-0.0877393	0.610864	0.739756	Negative
A0A0G2K1L5	Reep2	-0.0877206	0.610941	0.739756	Negative
Q62609	Olfm1	-0.0874496	0.612047	0.740146	Negative
Q5XI32	Capzb	-0.0874384	0.612093	0.740146	Negative
P24473	Gstk1	0.088673	0.612474	0.740146	Positive
B5DFE0	Mpp6	-0.0872531	0.61285	0.740146	Negative
M0RAM5	Gpx1	0.0898993	0.613126	0.740146	Positive
Q6AYR6	Hdhd2	0.088005	0.615166	0.741913	Positive
F1LPA6	Padi2	0.0955896	0.615336	0.741913	Positive
P19234	Ndufv2	-0.0863199	0.616669	0.742647	Negative
O35964	Sh3gl1	0.0862957	0.616768	0.742647	Positive
D3Z900	Marc2	0.086223	0.617066	0.742647	Positive
F1LUT4	Atp8a1	0.0860253	0.617876	0.743172	Positive
P63004	Pafah1b1	-0.0856296	0.6195	0.744674	Negative
P07895	Sod2	0.0851989	0.621269	0.746349	Positive
Q5XIG0	Nudt9	-0.0859979	0.623282	0.748315	Negative
A0A0G2KAI8	NA	0.0840087	0.626169	0.751257	Positive
Q5U211	Snx3	0.0838568	0.626796	0.751257	Positive
G3V9W0	Cetn2	0.0838395	0.626867	0.751257	Positive
Q5XIA5	Coasy	0.0889122	0.628448	0.752698	Positive
P05197	Eef2	0.0823942	0.632841	0.756982	Positive
Q5XIF6	Tuba4a	0.0823759	0.632917	0.756982	Positive
A0A0G2JSM7	Add1	-0.0823153	0.633168	0.756982	Negative
Q4V8E1	Gatad2b	0.0832851	0.63432	0.757455	Positive
G3V803	Cdh2	-0.0820359	0.634326	0.757455	Negative
Q66H12	Naga	0.0855594	0.635914	0.758467	Positive
B0BND0	Enpp6	0.0828895	0.635937	0.758467	Positive
Q5U2P5	C2cd2l	-0.0813746	0.637069	0.759362	Negative
Q5XIM7	Kars	0.0850536	0.637919	0.759474	Positive
P21707	Syt1	0.0810306	0.638499	0.759474	Positive
D4A3I4	Btf3l4	0.0848433	0.638753	0.759474	Positive
Q8R424	Stambp	0.082083	0.639237	0.759474	Positive
D4A055-1	Cacnb4	0.0807892	0.639502	0.759474	Positive
A0A0G2JUG7	NA	-0.0807674	0.639593	0.759474	Negative
A0A0G2K8H0	Caprin1	0.0832217	0.639839	0.759474	Positive
O08651	Phgdh	-0.0801995	0.641957	0.761533	Negative
F1LT35	RGD1564606	-0.0800364	0.642636	0.761884	Negative
P32851	Stx1a	0.0798811	0.643283	0.762197	Positive
D3ZQL7	Tppp	-0.0797209	0.643951	0.762533	Negative
D3ZD09	Cox6b1	-0.0794276	0.645175	0.763426	Negative
P29419	Atp5i	-0.0792836	0.645776	0.763426	Negative
Q6AYS2	Sfxn1	-0.0792641	0.645857	0.763426	Negative
D3ZX38	Pfdn1	0.0790167	0.646891	0.764193	Positive
P15999	Atp5a1	-0.0782506	0.650095	0.767521	Negative
F1LPV0	Nars	-0.0778342	0.651839	0.768947	Negative
B5DF91	Elavl1	0.0777775	0.652076	0.768947	Positive
P85971	Pgls	-0.0811423	0.653507	0.770177	Negative
Q03555-6	Gphn	-0.0766042	0.657001	0.773266	Negative
G3V9P7	Htt	0.076594	0.657044	0.773266	Positive
P11507-2	Atp2a2	-0.076534	0.657296	0.773266	Negative
Q6GMM8	Slc27a1	0.0760411	0.659369	0.77515	Positive
Q6PCT3	Tpd52l2	0.075968	0.659677	0.77515	Positive
F1LSC8	Rimbp2	-0.0755794	0.661314	0.776498	Negative
F1LYI5	RGD1564138	-0.07551	0.661606	0.776498	Negative
A0A0U1RRV7	Srsf3	-0.0763932	0.662711	0.777336	Negative
O35314	Chgb	0.0762703	0.663222	0.777476	Positive
P19492-2	Gria3	-0.0749922	0.66379	0.777683	Negative
F7F1Y3	Vps4a	0.0744568	0.666051	0.77945	Positive
Q9EPH8	Pabpc1	0.0743073	0.666683	0.77945	Positive
O35331	Pdxk	0.074176	0.667237	0.77945	Positive
D3ZDU5	Pfn2	0.0763642	0.667742	0.77945	Positive
Q6QIX3	Slc30a3	0.0740142	0.667922	0.77945	Positive
P63159	Hmgb1	0.0739892	0.668027	0.77945	Positive
A0A0H2UHG7	Rps20	0.0739853	0.668044	0.77945	Positive
O08629	Trim28	-0.0736793	0.669339	0.780503	Negative
F1M820	Sorbs1	-0.0758064	0.670032	0.780853	Negative
A0A0G2JSQ1	Sncb	0.0730162	0.672148	0.782793	Positive
Q3ZAU6	Rnf14	0.0729368	0.672485	0.782793	Positive
F1LRI5	Gcn1l1	0.0723191	0.675106	0.785384	Positive
D3ZUY8	Ap2a1	0.072033	0.676321	0.786143	Positive
M0R9Q1	LOC100911677	0.0719792	0.67655	0.786143	Positive
B2RYX0	Naca	-0.0748933	0.678711	0.788193	Negative
F1LM55	Ccar2	-0.0713634	0.679169	0.788265	Negative
Q9Z0W5	Pacsin1	0.0711367	0.680134	0.788924	Positive
Q9WUS0	Ak4	0.0703681	0.68341	0.791949	Positive
Q6P9Y4	Slc25a4	0.0703378	0.683539	0.791949	Positive
G3V7V9	Lcmt1	0.0702015	0.684121	0.792161	Positive
A0A096MJG7	LOC102554591	0.070044	0.684793	0.792478	Positive
A0A0G2KAM3	Pdhb	0.0698815	0.685487	0.792819	Positive
A0A0G2K904	NA	0.0730442	0.686236	0.793017	Positive
P13233	Cnp	0.0696544	0.686457	0.793017	Positive
Q6Q0N1	Cndp2	-0.0695414	0.68694	0.793114	Negative
Q6AYK8	Eif3d	-0.0693983	0.687551	0.793359	Negative
D4A4K4	Vps13c	0.0683419	0.692073	0.798113	Positive
P14659	Hspa2	-0.0664519	0.700188	0.807004	Negative
P12839	Nefm	-0.0653978	0.704729	0.811766	Negative
P52759	Hrsp12	0.0676357	0.708416	0.81554	Positive
A0A0G2KAW2	Sipa1l1	0.0639194	0.711114	0.818042	Positive
F7EV94	Bckdha	0.0638504	0.711412	0.818042	Positive
P09527	Rab7a	-0.0636726	0.712182	0.818453	Negative
G3V7L6	Psmc2	0.063156	0.714418	0.819618	Positive
Q64548-2	Rtn1	0.0696074	0.714739	0.819618	Positive
P50554	Abat	0.0630775	0.714759	0.819618	Positive
P83868	Ptges3	-0.0650001	0.714945	0.819618	Negative
Q9ESB5	Necab1	-0.0629623	0.715258	0.819618	Negative
A0A0G2K490	Tnik	-0.0628286	0.715838	0.819809	Negative
Q63092	Camkv	0.0624743	0.717374	0.820432	Positive
D3ZA93	Acot13	-0.0633068	0.717884	0.820432	Negative
Q6AYU5	Pcbp2	0.0622931	0.71816	0.820432	Positive
P51583	Paics	0.0622696	0.718262	0.820432	Positive
Q5U2X8	Acot9	0.0622065	0.718536	0.820432	Positive
P97546	Nptn	0.0620688	0.719134	0.820432	Positive
Q6AYS7	Acy1a	0.062037	0.719272	0.820432	Positive
Q6AXU6	Hn1	0.0616546	0.720933	0.821668	Positive
A0A0G2K459	NA	0.0615972	0.721182	0.821668	Positive
F1LRV6	Gmpr	0.0665321	0.722135	0.822282	Positive
F1LYS1	Rims1	0.0611855	0.722972	0.822764	Positive
D4A9P7	LOC100363408	0.0601569	0.72745	0.827386	Positive
Q9Z2L0	Vdac1	-0.059951	0.728348	0.827933	Negative
D4A4F9	LOC682489	-0.0669391	0.730088	0.829255	Negative
A0A0H2UHF5	Kcnj10	0.0623442	0.730345	0.829255	Positive
P97846	Cntnap1	0.0593382	0.731021	0.829548	Positive
P63090	Ptn	-0.0590337	0.732351	0.830582	Negative
Q9JHL4-3	Dbnl	-0.0589115	0.732885	0.830691	Negative
G3V728	Nipsnap1	-0.0588204	0.733283	0.830691	Negative
B2RZD6	Ndufa4	0.0585452	0.734485	0.83158	Positive
B5DEH2	Erlin2	0.0610701	0.735657	0.832111	Positive
D4A554	Eif4g3	0.0591338	0.735792	0.832111	Positive
Q68FS4-2	Lap3	-0.0578962	0.737324	0.833114	Negative
P19103	Ppp1r1a	-0.0575817	0.738701	0.833114	Negative
B1WC34	Prkcsh	-0.0575572	0.738808	0.833114	Negative
P56571	NA	-0.0575512	0.738835	0.833114	Negative
Q3KRE2	Mettl7a	-0.0646826	0.738867	0.833114	Negative
Q66X93	Snd1	0.0574666	0.739205	0.833114	Positive
A0A140TAI3	Hnrnpc	0.0573732	0.739614	0.833114	Positive
P04764	Eno1	0.05713	0.74068	0.833842	Positive
G3V6H9	Nap1l1	-0.0562648	0.744475	0.83764	Negative
P11275	Camk2a	-0.055629	0.747268	0.840306	Negative
Q9QUH6	Syngap1	-0.0554845	0.747903	0.840545	Negative
F1LXD6	Pitpnm2	-0.0550642	0.749751	0.841808	Negative
P23385-2	Grm1	0.0549951	0.750055	0.841808	Positive
Q4KLF8	Arpc5	0.05494	0.750298	0.841808	Positive
Q3KRE0	Atad3	0.0542707	0.753244	0.844637	Positive
A0A0G2K6X9	Adk	-0.0533261	0.757409	0.848635	Negative
Q6PDV7	Rpl10	0.0532684	0.757664	0.848635	Positive
Q62639	Rheb	-0.0531305	0.758272	0.848838	Negative
O88637-2	Pcyt2	-0.0530243	0.758742	0.848885	Negative
Q4V7D9	Smpdl3b	0.0544946	0.759531	0.849289	Positive
P62909	Rps3	-0.0520756	0.762933	0.852614	Negative
P39069	Ak1	0.0513589	0.766105	0.855677	Positive
Q71UF4	Rbbp7	-0.0511047	0.76723	0.856453	Negative
P55051	Fabp7	-0.0509777	0.767792	0.856599	Negative
P43425	Gng7	-0.0533193	0.768226	0.856603	Negative
P07632	Sod1	0.0507459	0.76882	0.856783	Positive
D4A6U1	Adam11	-0.0501144	0.77162	0.859207	Negative
D3ZG43	Ndufs3	0.0500604	0.771859	0.859207	Positive
Q09073	Slc25a5	-0.0499312	0.772432	0.859363	Negative
P07340	Atp1b1	-0.0497785	0.77311	0.859636	Negative
Q64232	Tecr	0.0496704	0.77359	0.859689	Positive
P52555	Erp29	-0.048249	0.779907	0.866224	Negative
D3ZPN3	Mlf2	0.0470982	0.785032	0.870988	Positive
Q7TQ16	Uqcrq	0.047089	0.785073	0.870988	Positive
A0A0G2K079	Bcas1	0.0473307	0.787165	0.872821	Positive
Q4KLH4	Pspc1	0.0463864	0.788206	0.873489	Positive
P63039	Hspd1	-0.0462567	0.788785	0.873643	Negative
A0A0H2UHQ8	LOC100364909	0.0461464	0.789277	0.873695	Positive
D4A9D6	Dhx9	0.0460492	0.789711	0.873695	Positive
P03994	Hapln1	0.0458	0.790824	0.874186	Positive
B2RYN0	Pgm3	0.0457528	0.791035	0.874186	Positive
O70257	Stx7	-0.0454976	0.792174	0.874766	Negative
Q9ERS3	Cacna2d1	0.0454382	0.79244	0.874766	Positive
G3V6I1	Llgl1	0.0452447	0.793305	0.875003	Positive
Q6MG06	Gnl1	-0.0489917	0.793536	0.875003	Negative
Q9QYU4	Crym	-0.0448748	0.794958	0.876085	Negative
Q9Z270	Vapa	0.0447563	0.795488	0.876183	Positive
D4A7N1	Chchd6	0.0443568	0.797276	0.877666	Positive
B2GUZ3	Mthfd1l	0.0432869	0.802067	0.881899	Positive
D3ZDK7	Pgp	0.0432721	0.802133	0.881899	Positive
B2RYQ5	Erh	0.0431845	0.802526	0.881899	Positive
Q62634	Slc17a7	0.0430278	0.803229	0.881899	Positive
B0BN81	Rps5	-0.043003	0.80334	0.881899	Negative
G3V864	Lppr4	0.0424277	0.80592	0.884243	Positive
Q6AYD5	Gspt1	-0.0419255	0.808175	0.886227	Negative
B2RZ74	Snrnp70	0.0419381	0.810947	0.888238	Positive
P63088-2	Ppp1cc	0.0418568	0.811308	0.888238	Positive
D3ZKK5	Mtmr1	0.0424054	0.811786	0.888238	Positive
P63249	Pkia	-0.0438151	0.811797	0.888238	Negative
F1LND7	Fdps	-0.0406065	0.814102	0.89027	Negative
D4A7U1	Zyx	-0.0420509	0.816264	0.892144	Negative
P54921	Napa	-0.0391866	0.820495	0.896274	Negative
P29418	Atp5e	0.0395885	0.821364	0.89673	Positive
F1M9B5	Atp2c1	0.0386808	0.822774	0.897777	Positive
A0A0H2UHQ1	Rpl17	0.0384912	0.82363	0.898217	Positive
F1MAA5	Rangap1	-0.0380539	0.825602	0.899829	Negative
F1LQ55	Scp2	0.0379629	0.826013	0.899829	Positive
Q3KRD5	Tomm34	-0.0378214	0.826651	0.900031	Negative
G3V8U9	Psmb4	0.0367354	0.831557	0.904876	Positive
D3ZCI5	Stxbp6	-0.0365979	0.832178	0.905057	Negative
X1WI37	LOC100362640	0.03644	0.832892	0.905337	Positive
Q9QX69	Lancl1	0.0362916	0.833563	0.905434	Positive
P0C170	Hist1h2ac	0.0362188	0.833892	0.905434	Positive
D4A4M0	Shisa6	0.0360433	0.834686	0.905801	Positive
P60123	Ruvbl1	0.0356927	0.836272	0.906421	Positive
D4A4T0	Stub1	0.0356011	0.836687	0.906421	Positive
D4A0X3	Btbd8	0.0355368	0.836978	0.906421	Positive
P62832	Rpl23	0.0355138	0.837082	0.906421	Positive
A0A0G2JU66	Nploc4	0.0353452	0.837845	0.906753	Positive
D3Z955	Pgm2l1	0.0346756	0.840877	0.909334	Positive
G3V826	Tkt	-0.0346164	0.841146	0.909334	Negative
Q9QXU9	Pcsk1n	0.0344639	0.841837	0.909586	Positive
Q9QYU2	Tsfm	0.0353003	0.842891	0.910033	Positive
A2RUW1	Tollip	0.0357196	0.843558	0.910033	Positive
M0RCH6	Chmp4b	0.0340696	0.843624	0.910033	Positive
O70511	Ank3	0.033919	0.844307	0.910275	Positive
D4A8V2	Ccdc177	-0.0337185	0.845216	0.910323	Negative
P10760	Ahcy	0.0336815	0.845383	0.910323	Positive
A0A0G2JXN2	NA	-0.0341187	0.845726	0.910323	Negative
A0A096MKG5	Nadk2	-0.0355304	0.846916	0.910584	Negative
Q4KM38	Srsf10	-0.0337443	0.847399	0.910584	Negative
D3ZW55	Itpa	0.033179	0.847663	0.910584	Positive
Q7TP14	Chid1	-0.0331487	0.847801	0.910584	Negative
B1H2A6	Fxr2	-0.0349402	0.851973	0.914285	Negative
D4ADE5	Setd7	-0.032122	0.852462	0.914285	Negative
D4A053	Shroom2	-0.0325752	0.852627	0.914285	Negative
P62914	Rpl11	0.0313494	0.855973	0.917378	Positive
Q566R0	Them4	0.0308929	0.858049	0.919107	Positive
P09951	Syn1	-0.030693	0.858958	0.919327	Negative
A0A0G2KA27	Madd	0.0306443	0.85918	0.919327	Positive
Q3B7U9	Fkbp8	-0.0304786	0.859934	0.919638	Negative
B0BN18	Pfdn2	0.030007	0.86208	0.920824	Positive
A0A0G2K350	Napg	-0.0296589	0.863665	0.920824	Negative
Q5XI64	Abhd6	-0.0300698	0.863852	0.920824	Negative
A0A0G2K7Y2	Oxr1	-0.0295681	0.864078	0.920824	Negative
G3V7V3	Slc27a4	0.0295579	0.864125	0.920824	Positive
Q6PDW4	Psmb1	0.0295253	0.864273	0.920824	Positive
F8WFM2	Napb	-0.0295225	0.864286	0.920824	Negative
D3ZCL3	Snrpc	0.029786	0.865125	0.92097	Positive
F1LQL1	Nos1	0.0306945	0.86535	0.92097	Positive
Q5XIN6	Letm1	0.0288694	0.867261	0.92251	Positive
Q9JLU4-2	Shank3	0.0286742	0.868151	0.922962	Positive
Q9WUD9	Src	-0.0288542	0.869307	0.923426	Negative
D3ZI16	Cops6	0.0283544	0.869609	0.923426	Positive
A0A5D0	Cd200	0.0282727	0.869981	0.923426	Positive
A0A0G2JZS1	Kpna6	-0.0280828	0.872773	0.92565	Negative
Q5EGY4	Ykt6	0.0280303	0.873008	0.92565	Positive
P07171	Calb1	-0.0271706	0.875009	0.926725	Negative
P05765	Rps21	-0.0275683	0.875085	0.926725	Negative
F1M3H8	Hnrnpa0	-0.0270802	0.875422	0.926725	Negative
A0A0G2JT06	Gps1	-0.0266973	0.87717	0.928081	Negative
Q5QJC9	Bag5	0.0280719	0.878784	0.929294	Positive
Q6P6G9	Hnrnpa1	0.0262252	0.879326	0.929372	Positive
D4A6P1	Sez6l2	0.0258418	0.881077	0.930286	Positive
P63329	Ppp3ca	0.025831	0.881127	0.930286	Positive
D3ZUP5	Brk1	-0.0250081	0.884888	0.933761	Negative
D3ZDJ3	Elmod1	0.0268894	0.885827	0.934256	Positive
G3V741	Slc25a3	0.0246782	0.886396	0.934361	Positive
A0A0G2K038	Rexo2	-0.02525	0.88728	0.934587	Negative
F8WFS9	Add2	0.0242919	0.888164	0.934587	Positive
Q62813	Lsamp	0.0242632	0.888295	0.934587	Positive
Q99N27	Snx1	0.0241885	0.888637	0.934587	Positive
P84083	Arf5	0.0241172	0.888963	0.934587	Positive
A0A0H2UHZ2	Nap1l4	-0.023844	0.890213	0.934691	Negative
Q9QVC8	Fkbp4	-0.0237905	0.890458	0.934691	Negative
Q4FZY0	Efhd2	0.0237873	0.890473	0.934691	Positive
A0A0G2JVK4	Nln	-0.0233414	0.892514	0.936338	Negative
Q4G061	Eif3b	-0.0226596	0.895636	0.938737	Negative
P18297	Spr	-0.0245402	0.895745	0.938737	Negative
G3V8G4	Bcan	0.0222412	0.897553	0.940136	Positive
P49911	Anp32a	-0.0220375	0.898486	0.940184	Negative
M0R402	Tmx3	0.0230819	0.898545	0.940184	Positive
A0A0G2K0T6	Sncg	-0.0212446	0.902121	0.943049	Negative
Q9Z1E1	Flot1	-0.0212202	0.902233	0.943049	Negative
D4AC36	Eif3f	0.0234707	0.90381	0.944201	Positive
P62083	Rps7	-0.0200746	0.907487	0.947545	Negative
D4A4Z9	Ktn1	-0.0198816	0.908373	0.947971	Negative
F1M7V6	Cadm4	-0.0189362	0.912713	0.951931	Negative
Q5BJR4	Prune2	-0.020432	0.913126	0.951931	Negative
M0R649	Exoc4	0.0186245	0.914145	0.952161	Positive
Q91ZY8	Trim9	0.0185623	0.91443	0.952161	Positive
P61227	Rap2b	-0.0184013	0.91517	0.952161	Negative
Q5M821	Ppm1h	0.0183809	0.915263	0.952161	Positive
F1M3D2	Dmwd	0.018427	0.916324	0.952444	Positive
F1LQI4	Acan	-0.0189748	0.916528	0.952444	Negative
Q5M9H7	Dnaja2	0.0180088	0.916973	0.952444	Positive
P62747	Rhob	0.0174585	0.919502	0.954436	Positive
B0BNL2	LOC364561	0.0173824	0.919851	0.954436	Positive
P43138	Apex1	-0.0172285	0.920559	0.954671	Negative
F1M7L6	Scg3	0.0169852	0.922851	0.956489	Positive
A2RRU1	Gys1	-0.0166377	0.923274	0.956489	Negative
P08081-2	Clta	0.0164691	0.92405	0.956794	Positive
D4A8H3	Uba6	-0.0177052	0.926013	0.958327	Negative
Q91ZW1	Tfam	-0.015713	0.928614	0.960518	Negative
Q4AEF8	Copg1	-0.0152541	0.929639	0.961078	Negative
Q6P9V6	Psma5	-0.0151166	0.930271	0.961232	Negative
P11517	NA	0.0149934	0.930838	0.961318	Positive
Q00959	Grin2a	0.0144318	0.933423	0.963486	Positive
Q6PCU2	Atp6v1e1	0.0141561	0.934692	0.964295	Positive
F8WFH6	Fam131b	-0.0139948	0.935435	0.964561	Negative
Q6P6T4-2	Eml2	0.012936	0.94031	0.968926	Positive
A0A0G2K7W8	Hint3	-0.0127285	0.941266	0.968926	Negative
P70580	Pgrmc1	0.0126838	0.941472	0.968926	Positive
F1LM47	Sucla2	-0.0126519	0.941619	0.968926	Negative
D4AE68	Gnaq	-0.0124057	0.942753	0.969591	Negative
O35867	Ppp1r9a	-0.012295	0.943263	0.969614	Negative
A0A0G2K9Q6	Atp2b3	-0.0116763	0.946114	0.972041	Negative
Q99NA5	Idh3a	-0.0113682	0.947534	0.972997	Negative
P14270-1	Pde4d	-0.0112317	0.948163	0.973141	Negative
P26453-2	Bsg	0.0108478	0.949933	0.973174	Positive
O88377	Pip4k2b	0.0107936	0.950182	0.973174	Positive
F1LRU1	Ilf3	-0.0107311	0.95047	0.973174	Negative
Q4QRB4	Tubb3	-0.0106091	0.951033	0.973174	Negative
Q03344	Atpif1	-0.0105037	0.951519	0.973174	Negative
P50398	Gdi1	-0.0104479	0.951776	0.973174	Negative
P47971	Nptx1	-0.0104197	0.951906	0.973174	Negative
Q5M9H2	Acadvl	-0.01035	0.952227	0.973174	Negative
Q6AYD3	Pa2g4	-0.0102036	0.952902	0.973174	Negative
A0A0G2K6J5	Myl6	0.00988493	0.954372	0.973174	Positive
G3V7W1-2	Pdcd6	0.00985645	0.954503	0.973174	Positive
M0R3U3	Ildr2	-0.0103147	0.954569	0.973174	Negative
A0A0G2K7W6	Rpl27a	0.00977043	0.9549	0.973174	Positive
Q641Y8	Ddx1	-0.00973725	0.955053	0.973174	Negative
P27605	Hprt1	-0.00931678	0.956992	0.974446	Negative
Q8K3M6	Erc2	-0.00892843	0.958783	0.974446	Negative
D3ZSS1	Taf15	-0.00947377	0.958958	0.974446	Negative
P14669	Anxa3	0.00888959	0.958962	0.974446	Positive
D4A197	Mcee	-0.00872996	0.959698	0.974446	Negative
B0BNM1	Apoa1bp	-0.00859148	0.960337	0.974446	Negative
P05708	Hk1	0.00854131	0.960569	0.974446	Positive
Q5FVM4	Nono	0.00852562	0.960641	0.974446	Positive
Q5M9I5	Uqcrh	-0.00850966	0.960715	0.974446	Negative
Q68FX3	Ddx19a	-0.00809938	0.963169	0.976437	Negative
Q1JU68	Eif3a	0.00727921	0.966392	0.979205	Positive
D3ZCZ9	LOC100912599	-0.00688479	0.968212	0.980549	Negative
Q6P6T6	Ctsd	0.00671916	0.968976	0.980823	Positive
F1LPG5	LOC688963	-0.00659461	0.969551	0.980905	Negative
Q63259	Ptprn	0.00624805	0.972024	0.982907	Positive
B5DF89	Cul3	0.00580309	0.973204	0.98324	Positive
P11232	Txn	-0.00586113	0.973343	0.98324	Negative
Q5XIM5	Cdv3	0.00525177	0.976114	0.985467	Positive
A0A0G2JW34	NA	-0.00571198	0.97654	0.985467	Negative
P05696	Prkca	-0.00482133	0.977736	0.986173	Negative
P70550	Rab8b	0.00453477	0.979059	0.987007	Positive
F1M8A5	Hypk	-0.00432365	0.981263	0.98848	Negative
B5DEN5	Eef1b2	-0.00390991	0.981944	0.98848	Negative
M0RBE5	Nrn1	-0.00408215	0.982012	0.98848	Negative
P62250	Rps16	-0.00361265	0.983317	0.989254	Negative
B0K020	Cisd1	0.00351287	0.983777	0.989254	Positive
Q68FZ8	Pccb	-0.00293259	0.986457	0.991447	Negative
G3V792	Dync1i1	0.00281935	0.98698	0.991471	Positive
B1H267	Snx5	-0.00232237	0.989275	0.993208	Negative
M0R5U4	Adcy9	-0.00216629	0.989996	0.993208	Negative
P84087	Cplx2	-0.00209237	0.990337	0.993208	Negative
P62198	Psmc5	0.00195501	0.990971	0.993208	Positive
Q9WVB1	Rab6a	-0.00180006	0.991687	0.993208	Negative
Q6GMN2-2	Baiap2	-0.00179539	0.991708	0.993208	Negative
A0A0G2JTW9	NA	-0.00048636	0.997754	0.998759	Negative
P35213	Ywhab	-0.000228798	0.998943	0.999015	Negative
Q5RJK5	LOC100360260	-0.000227322	0.999015	0.999015	Negative

## Sheet: sheet_4
protein_id	gene_symbol	cor	p	fdr	cor_sign
P18422	Psma3	-0.583643	0.00139438	0.158829	Negative
G3V6G1	Jchain	0.575426	0.00168794	0.158829	Positive
D3ZUU6	Clec3b	0.569553	0.0019291	0.158829	Positive
P13221	Got1	-0.524714	0.0049552	0.305984	Negative
A0A8I5YC45	Ighe	0.504945	0.0072249	0.35691	Positive
Q9EQV9	Cpb2	0.485158	0.0103157	0.392397	Positive
P17475	Serpina1	0.47399	0.0125016	0.392397	Positive
P40112	Psmb3	0.473016	0.0127092	0.392397	Positive
A0A8I6ASK6	Fcrl1	0.460868	0.0155478	0.422244	Positive
Q9JHW0	Psmb7	-0.451945	0.0179503	0.422244	Negative
P62329	Tmsb4x	0.447923	0.019129	0.422244	Positive
P08649	C4	0.443448	0.0205139	0.422244	Positive
Q6P6T1	C1s	0.434619	0.0234871	0.446255	Positive
P09006	Serpina3n	0.424488	0.0273213	0.456099	Positive
P17945	Hgf	0.419596	0.0293462	0.456099	Positive
Q64240	Ambp	-0.419131	0.0295449	0.456099	Negative
P62963	Pfn1	0.409212	0.034046	0.491436	Positive
P04917	Srgn	-0.402706	0.0372859	0.491436	Negative
P07151	B2m	0.401227	0.0380558	0.491436	Positive
P06238	A2m	-0.391186	0.0436227	0.491436	Negative
P00564	Ckm	-0.390552	0.0439952	0.491436	Negative
Q7TPI9	Serpinc1	0.380659	0.0501329	0.491436	Positive
P16617	Pgk1	-0.379615	0.0508183	0.491436	Negative
A0A8I6A1C5	NA	-0.379359	0.0509871	0.491436	Negative
P10354	Chga	0.379199	0.0510932	0.491436	Positive
Q7TMA5	Apob	0.378242	0.0517301	0.491436	Positive
F1LVL2	Icoslg	-0.375122	0.053851	0.492637	Negative
A0A8J8YKQ8	C2	0.370663	0.0569995	0.502817	Positive
Q01177	Plg	0.365518	0.0608084	0.51792	Positive
P24594	Igfbp5	0.356864	0.0676587	0.534117	Positive
P48500	Tpi1	-0.355231	0.0690152	0.534117	Negative
F7ELL4	Hgfac	0.355014	0.0691974	0.534117	Positive
P04642	Ldha	-0.351688	0.0720316	0.539146	Negative
Q63556	Serpina3m	0.349007	0.0743804	0.539488	Positive
P35859	Igfals	0.345431	0.0776041	0.539488	Positive
Q99PS8	Hrg	0.344317	0.0786298	0.539488	Positive
Q64268	Serpind1	0.336926	0.0856993	0.55192	Positive
Q68FR2	Bin2	0.342066	0.0871814	0.55192	Positive
P14272	Klkb1	-0.330234	0.092506	0.55192	Negative
A0A0G2JV24	Thbs1	-0.329402	0.0933806	0.55192	Negative
P10959	Ces1c	0.328201	0.0946528	0.55192	Positive
P34058	Hsp90ab1	0.326398	0.0965883	0.55192	Positive
Q5XFX0	Tagln2	0.320395	0.103245	0.55192	Positive
D4A1T6	C1r	0.319923	0.103782	0.55192	Positive
Q5FVP9	LOC100361907	0.318962	0.104883	0.55192	Positive
Q6IE52	Mug2	-0.318874	0.104984	0.55192	Negative
P09495	Tpm4	0.318842	0.105021	0.55192	Positive
O88989	Mdh1	0.312728	0.112236	0.556479	Positive
P15684	Anpep	0.312408	0.112623	0.556479	Positive
Q6MG90	C4b	0.311103	0.114214	0.556479	Positive
P20059	Hpx	0.310544	0.1149	0.556479	Positive
Q63621	Il1rap	-0.305585	0.121123	0.559908	Negative
P51886	Lum	0.3033	0.124071	0.559908	Positive
P02761	NA	0.302211	0.125496	0.559908	Positive
Q9WTS8	Fcn1	0.301719	0.126142	0.559908	Positive
P19939	Apoc1	0.299886	0.128576	0.559908	Positive
P14659	Hspa2	-0.31121	0.129955	0.559908	Negative
P05371	Clu	0.297733	0.131476	0.559908	Positive
P02625	Pvalb	-0.293524	0.137284	0.571166	Negative
P07632	Sod1	-0.289817	0.14255	0.571166	Negative
P10111	Ppia	-0.289576	0.142898	0.571166	Negative
P14141	Ca3	-0.2885	0.144457	0.571166	Negative
A0A8I5ZZZ2	Serpina4	0.28766	0.145682	0.571166	Positive
P13635	Cp	0.284496	0.150362	0.580304	Positive
P06761	Hspa5	0.275818	0.163753	0.612905	Positive
P31211	Serpina6	-0.275806	0.163772	0.612905	Negative
P59996	Pcsk9	0.269625	0.17381	0.626349	Positive
Q6P734	Serping1	0.269125	0.174641	0.626349	Positive
B0BNN3	Ca1	-0.266783	0.178567	0.626349	Negative
P63102	Ywhaz	0.265455	0.18082	0.626349	Positive
P04797	Gapdh	-0.261121	0.188315	0.626349	Negative
A0A8I5Y662	NA	0.260874	0.188747	0.626349	Positive
Q63514	C4bpa	0.259819	0.190606	0.626349	Positive
P02767	Ttr	0.257685	0.194405	0.626349	Positive
P48199	Crp	0.253934	0.201208	0.626349	Positive
O35568	Efemp1	0.253529	0.201953	0.626349	Positive
P14046	A1i3	-0.252999	0.202929	0.626349	Negative
P24090	Ahsg	0.252146	0.204507	0.626349	Positive
P16310	Ghr	-0.250772	0.207068	0.626349	Negative
G3V9R2	Cfh	0.249965	0.208582	0.626349	Positive
Q6QMY6	Tsku	-0.248614	0.211134	0.626349	Negative
P18420	Psma1	-0.245742	0.216628	0.626349	Negative
D3ZAN3	Ganab	-0.245129	0.217813	0.626349	Negative
B0BNN4	Cfp	0.244785	0.21848	0.626349	Positive
P07335	Ckb	0.243534	0.220917	0.626349	Positive
G3V8K8	Proz	-0.243432	0.221116	0.626349	Negative
P08650	C5	0.24275	0.222454	0.626349	Positive
Q63416	Itih3	0.242071	0.223791	0.626349	Positive
A0A8I5ZV49	Flna	0.239603	0.228692	0.626349	Positive
P20759	NA	0.244467	0.228743	0.626349	Positive
P16290	Pgam2	-0.237376	0.233178	0.626349	Negative
A0A0G2JY81	Fbln1	0.237318	0.233296	0.626349	Positive
M0R8B6	Tubb1	0.230726	0.24692	0.655798	Positive
D3ZTE0	F12	-0.229205	0.250136	0.657272	Negative
P08025	Igf1	0.22679	0.255299	0.660217	Positive
Q62930	C9	0.225874	0.257275	0.660217	Positive
P61983	Ywhag	0.224951	0.259275	0.660217	Positive
P04639	Apoa1	0.22177	0.26625	0.671059	Positive
Q9QX79	Fetub	-0.218105	0.274437	0.677902	Negative
P35704	Prdx2	-0.218097	0.274454	0.677902	Negative
P04906	Gstp1	-0.216823	0.277336	0.678238	Negative
Q9WTT6	Gda	0.213312	0.295425	0.710477	Positive
P45592	Cfl1	-0.207666	0.298623	0.710477	Negative
P68370	Tuba1a	0.207446	0.299148	0.710477	Positive
P28064	Psmb8	-0.200722	0.315429	0.74201	Negative
A0A0G2K4I9	F11	-0.194171	0.331809	0.756989	Negative
A0A0G2JW29	Man1a1	0.194026	0.332175	0.756989	Positive
P01015	Agt	0.191381	0.338937	0.756989	Positive
G3V8D4	Apoc2	-0.190216	0.341941	0.756989	Negative
P35213	Ywhab	0.190139	0.342139	0.756989	Positive
Q08420	Sod3	0.190113	0.342208	0.756989	Positive
P04764	Eno1	-0.188583	0.346179	0.756989	Negative
P01946	Hba1	-0.188531	0.346315	0.756989	Negative
A0A8I6ATZ0	Cfhr2	0.185266	0.354882	0.763271	Positive
P33436	Mmp2	0.188578	0.356222	0.763271	Positive
P60901	Psma6	-0.183916	0.358459	0.763271	Negative
P27139	Ca2	-0.180751	0.366934	0.774638	Negative
P01048	Map1	0.174424	0.384222	0.804261	Positive
P0CG51	Ubb	0.172303	0.390118	0.809741	Positive
P55314	C8b	0.169549	0.397855	0.810576	Positive
P25236	Selenop	-0.167346	0.404103	0.810576	Negative
Q68FP1	Gsn	0.166165	0.407475	0.810576	Positive
F7FMS0	Mst1	0.165324	0.409886	0.810576	Positive
Q62740	Spp2	-0.16283	0.417083	0.810576	Negative
P08932	NA	0.162596	0.417763	0.810576	Positive
P02764	Orm1	0.16232	0.418564	0.810576	Positive
B2GVB9	Fermt3	0.16217	0.418999	0.810576	Positive
P60711	Actb	0.159905	0.425613	0.810576	Positive
A0A8I6AHQ8	Blvrb	-0.158092	0.430948	0.810576	Negative
P19999	Mbl1	-0.157972	0.431302	0.810576	Negative
F7ESI5	Cfhr1	0.157383	0.433044	0.810576	Positive
P04937	Fn1	0.156869	0.434565	0.810576	Positive
P11517	NA	-0.15623	0.436464	0.810576	Negative
Q03626	Mug1	-0.15495	0.440278	0.811558	Negative
Q99J86	Atrn	-0.153151	0.445668	0.815407	Negative
Q6IRK9	Cpq	-0.148442	0.459944	0.832351	Negative
B4F7A1	Lyrm7	-0.147727	0.462132	0.832351	Negative
Q6IUU3	Qsox1	0.146781	0.465038	0.832351	Positive
P15429	Eno3	-0.144748	0.480496	0.849168	Negative
P53813	Pros1	0.140531	0.484458	0.849168	Positive
O08770	Gp5	-0.140439	0.484748	0.849168	Negative
P18292	F2	-0.13882	0.489848	0.852059	Negative
Q62975	Serpina10	-0.136675	0.496643	0.85268	Negative
B1H260	F13b	-0.135826	0.499347	0.85268	Negative
P06399	Fga	0.134961	0.502107	0.85268	Positive
P06765	Pf4	-0.134366	0.504013	0.85268	Negative
F1LQT4	Cpn2	0.131157	0.514342	0.855551	Positive
P23680	Apcs	-0.130998	0.514859	0.855551	Negative
P04638	Apoa2	0.130025	0.518013	0.855551	Positive
A0A0G2K896	Inhca	0.129299	0.520372	0.855551	Positive
P16296	F9	0.127467	0.526347	0.855551	Positive
Q811M5	C6	0.127423	0.526493	0.855551	Positive
Q99J82	Ilk	0.126177	0.530577	0.856552	Positive
P05065	Aldoa	-0.124736	0.53532	0.858598	Negative
A0A8I6AQI7	Serpinf2	0.118099	0.557417	0.88221	Positive
A0A8I5ZU41	NA	0.113239	0.573859	0.88221	Positive
A0A8I6ABG6	Tln1	0.111836	0.578644	0.88221	Positive
P00787	Ctsb	-0.111775	0.578854	0.88221	Negative
Q5FVF9	Btd	-0.111004	0.581492	0.88221	Negative
P02651	Apoa4	0.110313	0.583858	0.88221	Positive
P31394	Proc	-0.10911	0.587991	0.88221	Negative
P16303	Ces1d	0.113601	0.588727	0.88221	Positive
O08775	Kdr	0.108699	0.589407	0.88221	Positive
Q63678	Azgp1	0.108082	0.591535	0.88221	Positive
P26644	Apoh	0.107428	0.593793	0.88221	Positive
P13596	Ncam1	0.107302	0.594229	0.88221	Positive
P14630	Apom	0.106653	0.596474	0.88221	Positive
P12346	Tf	0.100297	0.618655	0.90957	Positive
D3ZTX4	Mgam	0.0983598	0.625483	0.912953	Positive
Q9QZ76	Mb	-0.096515	0.632012	0.912953	Negative
Q63910	Hba-a3	0.0957636	0.634679	0.912953	Positive
P32038	Cfd	0.0944297	0.639425	0.912953	Positive
Q6L711	Habp2	0.0944264	0.639437	0.912953	Positive
G3V7P2	Fgl2	-0.0924025	0.646664	0.917966	Negative
Q5I0D7	Pepd	0.0884479	0.660877	0.93278	Positive
Q8K3R4	Adipoq	0.0870918	0.665777	0.934358	Positive
A0A1W2Q642	Pi16	-0.0859342	0.669971	0.934558	Negative
E9PSP1	Pltp	-0.0842755	0.675997	0.934558	Negative
Q5EBC0	Itih4	0.083183	0.679977	0.934558	Positive
P09812	Pygm	0.0826159	0.682046	0.934558	Positive
A0A8I6AG69	Cpamd8	0.077239	0.701774	0.934558	Positive
M0R485	Pglyrp2	0.0747871	0.710834	0.934558	Positive
P55797	Apoc4	0.074347	0.712464	0.934558	Positive
Q99ME0	Ppbp	0.0735682	0.715352	0.934558	Positive
P15473	Igfbp3	0.0732764	0.716435	0.934558	Positive
P69897	Tubb5	-0.0729379	0.717692	0.934558	Negative
Q9WUW3	Cfi	0.0729289	0.717726	0.934558	Positive
P05545	Serpina3k	-0.0728443	0.71804	0.934558	Negative
A0A8I5ZQD3	Fcgbp	0.0727189	0.718506	0.934558	Positive
P62738	Acta2	0.0726154	0.718891	0.934558	Positive
D3ZQU7	Gp1ba	-0.0670395	0.739709	0.956077	Negative
A0A8J8XL70	Serpinf1	0.0661134	0.743185	0.956077	Positive
Q6P6V0	Gpi	0.0632365	0.754013	0.956548	Positive
A0A0G2K3W2	F5	0.0628122	0.755614	0.956548	Positive
Q5M7T7	Pla2g7	-0.0621677	0.758048	0.956548	Negative
D3ZWD6	C8a	0.061758	0.759596	0.956548	Positive
P02091	Hbb	-0.0608805	0.762915	0.956548	Negative
P06759	Apoc3	0.0580018	0.773832	0.965335	Positive
Q8K3U6	F7	0.055449	0.783547	0.968497	Positive
P29534	Vcam1	0.0549	0.785641	0.968497	Positive
A0A8I5ZVC4	Itih2	-0.0514257	0.798924	0.968497	Negative
P01026	C3	-0.0506206	0.80201	0.968497	Negative
P55159	Pon1	-0.0499455	0.8046	0.968497	Negative
Q68FS4	Lap3	-0.0497738	0.805259	0.968497	Negative
P06866	Hp	0.0495594	0.806082	0.968497	Positive
O35217	Minpp1	0.0491291	0.807735	0.968497	Positive
P04276	Gc	0.0460328	0.81965	0.970464	Positive
Q63515	C4bpb	0.0454227	0.822002	0.970464	Positive
P85972	Vcl	0.0452629	0.822618	0.970464	Positive
P02454	Col1a1	-0.0446223	0.825091	0.970464	Negative
Q9WUH4	Fhl1	-0.0428818	0.831815	0.973736	Negative
Q9WVT0	Adgrf5	0.0422452	0.841089	0.976782	Positive
Q9JJS8	Masp2	-0.0401672	0.842326	0.976782	Negative
Q7TPA5	Serpina11	0.0379461	0.850946	0.979753	Positive
Q63207	F10	-0.0374636	0.852821	0.979753	Negative
Q08163	Cap1	-0.0364269	0.859772	0.981303	Negative
Q63041	A1m	-0.0350744	0.862116	0.981303	Negative
P22985	Xdh	-0.0329023	0.870582	0.983382	Negative
P23764	Gpx3	0.0309955	0.878025	0.983382	Positive
D4A3E0	Mmrn1	0.0309025	0.878389	0.983382	Positive
Q7TQ11	Vtn	-0.0298421	0.882533	0.983382	Negative
P81828	NA	0.0295052	0.88385	0.983382	Positive
Q5M890	Apon	0.0270647	0.893401	0.984035	Positive
P11980	Pkm	0.0235251	0.907279	0.984035	Positive
F7FAY5	LOC360919	0.0215592	0.914998	0.984035	Positive
P04692	Tpm1	-0.0211487	0.916611	0.984035	Negative
P04916	Rbp4	0.0202274	0.920232	0.984035	Positive
O08619	F13a1	-0.0190282	0.924948	0.984035	Negative
Q5XIF6	Tuba4a	0.0189905	0.925096	0.984035	Positive
P10960	Psap	0.018685	0.926298	0.984035	Positive
P02650	Apoe	0.0182658	0.927947	0.984035	Positive
G3V6K6	Egfr	-0.0169385	0.933171	0.984035	Negative
P18424	Lcat	0.0164781	0.934984	0.984035	Positive
Q9EQV8	Cpn1	-0.0160535	0.936656	0.984035	Negative
P05544	Serpina3l	0.0158557	0.937434	0.984035	Positive
D4A8G5	Tgfbi	-0.0139003	0.945138	0.984035	Negative
P14841	Cst3	-0.0138436	0.945361	0.984035	Negative
P36953	Afm	-0.0119009	0.95302	0.984035	Negative
F7EYX4	Itih1	-0.0101532	0.959913	0.984035	Negative
P08934	Kng1	-0.00974858	0.96151	0.984035	Negative
D4A183	Vnn3	0.00864342	0.965871	0.984035	Positive
A0A8I6ARV9	Ctsa	0.00819417	0.967643	0.984035	Positive
Q62894	Ecm1	0.00807858	0.9681	0.984035	Positive
A0A0G2K7F0	Fancm	0.00710614	0.973107	0.984997	Positive
Q8CHN8	Masp1	0.00492861	0.980535	0.984997	Positive
Q8R2H5	Gpld1	-0.00480857	0.981009	0.984997	Negative
A0A0G2K9Y5	LOC681544	0.000321241	0.998731	0.998731	Positive

## Sheet: sheet_5
protein_id	gene_symbol	cor	p	fdr	cor_sign
P16303	Ces1d	0.523134	0.00728875	0.903194	Positive
Q01177	Plg	0.448495	0.0189575	0.903194	Positive
Q5FVF9	Btd	-0.423178	0.0278521	0.903194	Negative
P02625	Pvalb	-0.407757	0.0347505	0.903194	Negative
P48199	Crp	0.40014	0.0386297	0.903194	Positive
P24090	Ahsg	0.381488	0.0495942	0.903194	Positive
Q5XIF6	Tuba4a	0.37761	0.0521542	0.903194	Positive
Q8R2H5	Gpld1	0.375245	0.0537658	0.903194	Positive
Q5FVP9	LOC100361907	0.374956	0.0539655	0.903194	Positive
Q5XFX0	Tagln2	0.373352	0.0550841	0.903194	Positive
P62963	Pfn1	0.372171	0.0559189	0.903194	Positive
P02761	NA	0.367586	0.0592544	0.903194	Positive
Q68FR2	Bin2	0.370679	0.062296	0.903194	Positive
P00564	Ckm	-0.357483	0.0671501	0.903194	Negative
P19939	Apoc1	0.350507	0.0730593	0.903194	Positive
B2GVB9	Fermt3	0.348512	0.0748205	0.903194	Positive
P02767	Ttr	0.34646	0.0766655	0.903194	Positive
F1LQT4	Cpn2	0.344937	0.0780577	0.903194	Positive
A0A1W2Q642	Pi16	0.344265	0.078678	0.903194	Positive
P04638	Apoa2	0.334449	0.0881729	0.903194	Positive
P04692	Tpm1	-0.32364	0.0996043	0.903194	Negative
Q08163	Cap1	0.328479	0.101344	0.903194	Positive
P02650	Apoe	0.318086	0.105894	0.903194	Positive
A0A8I5ZZZ2	Serpina4	0.318037	0.10595	0.903194	Positive
P0CG51	Ubb	0.316054	0.108267	0.903194	Positive
P05065	Aldoa	-0.31407	0.110621	0.903194	Negative
P14841	Cst3	0.31336	0.111474	0.903194	Positive
P31394	Proc	0.306751	0.119639	0.903194	Positive
P81828	NA	0.306422	0.120056	0.903194	Positive
D4A1T6	C1r	-0.301585	0.12632	0.903194	Negative
P35213	Ywhab	0.298109	0.130966	0.903194	Positive
P48500	Tpi1	-0.295258	0.13487	0.903194	Negative
P15429	Eno3	-0.300722	0.135496	0.903194	Negative
A0A0G2K3W2	F5	0.293079	0.137909	0.903194	Positive
P06761	Hspa5	0.291714	0.139838	0.903194	Positive
B4F7A1	Lyrm7	-0.290795	0.141147	0.903194	Negative
P34058	Hsp90ab1	0.289855	0.142497	0.903194	Positive
P16310	Ghr	0.287821	0.145445	0.903194	Positive
P55159	Pon1	0.284201	0.150805	0.903194	Positive
P07632	Sod1	-0.284156	0.150871	0.903194	Negative
P04642	Ldha	-0.283594	0.151717	0.903194	Negative
Q9WTS8	Fcn1	0.28074	0.156058	0.903194	Positive
Q6IE52	Mug2	0.27766	0.160843	0.903194	Positive
F7EYX4	Itih1	0.277312	0.161389	0.903194	Positive
M0R8B6	Tubb1	0.272657	0.168833	0.903194	Positive
Q63514	C4bpa	0.271186	0.171235	0.903194	Positive
P16290	Pgam2	-0.270794	0.171879	0.903194	Negative
P04916	Rbp4	0.266363	0.179278	0.903194	Positive
Q9EQV8	Cpn1	0.261872	0.187	0.903194	Positive
P06765	Pf4	0.258323	0.193263	0.903194	Positive
A0A8I6ABG6	Tln1	0.257814	0.194174	0.903194	Positive
Q9JJS8	Masp2	0.256111	0.19724	0.903194	Positive
A0A8I6AG69	Cpamd8	0.254615	0.199961	0.903194	Positive
P05544	Serpina3l	0.253555	0.201904	0.903194	Positive
Q63678	Azgp1	0.250786	0.207042	0.903194	Positive
P55797	Apoc4	0.250112	0.208305	0.903194	Positive
P63102	Ywhaz	0.250046	0.208429	0.903194	Positive
P08025	Igf1	0.247902	0.212487	0.904901	Positive
A0A8I5ZV49	Flna	0.243638	0.220713	0.915572	Positive
F7ESI5	Cfhr1	0.242774	0.222406	0.915572	Positive
P06238	A2m	-0.240399	0.227104	0.919587	Negative
P16296	F9	0.238523	0.230861	0.91972	Positive
A0A8I5ZU41	NA	0.236458	0.235044	0.921522	Positive
Q99J82	Ilk	0.234309	0.239452	0.924134	Positive
P07335	Ckb	0.230917	0.246518	0.930492	Positive
O08619	F13a1	0.228002	0.252698	0.930492	Positive
E9PSP1	Pltp	0.227492	0.253791	0.930492	Positive
O08770	Gp5	-0.226387	0.256168	0.930492	Negative
D4A8G5	Tgfbi	-0.224633	0.259969	0.930614	Negative
P06759	Apoc3	0.221342	0.2672	0.942833	Positive
P02764	Orm1	-0.218581	0.273365	0.951001	Negative
P15473	Igfbp3	0.215213	0.281007	0.957689	Positive
P55314	C8b	0.206141	0.302265	0.957689	Positive
Q99J86	Atrn	0.206129	0.302294	0.957689	Positive
G3V6G1	Jchain	0.205868	0.302919	0.957689	Positive
Q7TPI9	Serpinc1	0.201374	0.313827	0.957689	Positive
P51886	Lum	0.200235	0.316631	0.957689	Positive
A0A0G2JY81	Fbln1	0.198788	0.320213	0.957689	Positive
P68370	Tuba1a	0.198555	0.320792	0.957689	Positive
A0A0G2JV24	Thbs1	0.197084	0.324463	0.957689	Positive
P14659	Hspa2	-0.202122	0.332585	0.957689	Negative
Q5I0D7	Pepd	-0.191584	0.338415	0.957689	Negative
B0BNN4	Cfp	0.190903	0.340168	0.957689	Positive
P85972	Vcl	0.189203	0.344566	0.957689	Positive
Q68FS4	Lap3	-0.188637	0.346037	0.957689	Negative
P53813	Pros1	0.18776	0.348326	0.957689	Positive
G3V7P2	Fgl2	-0.185423	0.354467	0.957689	Negative
P04276	Gc	0.183305	0.360087	0.957689	Positive
A0A8I6AQI7	Serpinf2	-0.181906	0.363828	0.957689	Negative
Q62740	Spp2	0.181896	0.363856	0.957689	Positive
A0A8I6ATZ0	Cfhr2	0.179577	0.370107	0.957689	Positive
P18420	Psma1	0.17821	0.373821	0.957689	Positive
P11980	Pkm	-0.177039	0.377021	0.957689	Negative
O08775	Kdr	0.176353	0.378903	0.957689	Positive
Q6P734	Serping1	0.17562	0.380917	0.957689	Positive
Q63041	A1m	0.174194	0.384857	0.957689	Positive
P61983	Ywhag	0.17093	0.393965	0.957689	Positive
Q6IUU3	Qsox1	0.170466	0.395267	0.957689	Positive
Q811M5	C6	0.170092	0.396322	0.957689	Positive
P17945	Hgf	0.1693	0.398557	0.957689	Positive
Q62930	C9	0.166035	0.407848	0.957689	Positive
F1LVL2	Icoslg	-0.165775	0.408594	0.957689	Negative
P08649	C4	0.165045	0.410688	0.957689	Positive
P04797	Gapdh	-0.164658	0.411801	0.957689	Negative
P62329	Tmsb4x	0.161895	0.4198	0.957689	Positive
P04906	Gstp1	0.160514	0.423829	0.957689	Positive
Q5EBC0	Itih4	-0.160503	0.423861	0.957689	Negative
P22985	Xdh	0.159733	0.426118	0.957689	Positive
Q5M890	Apon	0.157626	0.432325	0.957689	Positive
Q9WUW3	Cfi	0.155702	0.438036	0.957689	Positive
P62738	Acta2	-0.15488	0.440487	0.957689	Negative
Q8CHN8	Masp1	0.154213	0.442481	0.957689	Positive
Q99ME0	Ppbp	0.153365	0.445025	0.957689	Positive
G3V8D4	Apoc2	0.152716	0.446976	0.957689	Positive
P01015	Agt	0.152012	0.449099	0.957689	Positive
D4A183	Vnn3	0.150927	0.452381	0.957689	Positive
P04764	Eno1	-0.150511	0.453642	0.957689	Negative
P13635	Cp	0.147218	0.463694	0.970614	Positive
P07151	B2m	0.144208	0.472983	0.97553	Positive
D3ZUU6	Clec3b	0.142956	0.476875	0.97553	Positive
P02651	Apoa4	0.141366	0.48184	0.97553	Positive
P08650	C5	-0.141366	0.481841	0.97553	Negative
D3ZQU7	Gp1ba	-0.137177	0.49505	0.977547	Negative
Q6P6T1	C1s	-0.137039	0.495486	0.977547	Negative
P18422	Psma3	0.135848	0.499277	0.977547	Positive
P36953	Afm	0.133494	0.506809	0.977547	Positive
A0A8I5YC45	Ighe	0.132917	0.508665	0.977547	Positive
O35568	Efemp1	0.132396	0.510344	0.977547	Positive
D3ZTE0	F12	-0.132186	0.511021	0.977547	Negative
A0A8I6A1C5	NA	0.129483	0.519774	0.977547	Positive
A0A8I6ASK6	Fcrl1	0.126597	0.529199	0.977547	Positive
P13221	Got1	-0.125674	0.53223	0.977547	Negative
Q63910	Hba-a3	-0.122315	0.543332	0.977547	Negative
P09495	Tpm4	0.121811	0.545006	0.977547	Positive
Q6QMY6	Tsku	0.121159	0.547177	0.977547	Positive
Q6L711	Habp2	-0.116323	0.563401	0.977547	Negative
A0A0G2JW29	Man1a1	-0.115355	0.566674	0.977547	Negative
P00787	Ctsb	-0.114167	0.570702	0.977547	Negative
P45592	Cfl1	0.111554	0.57961	0.977547	Positive
P26644	Apoh	-0.108339	0.59065	0.977547	Negative
G3V6K6	Egfr	0.107552	0.593365	0.977547	Positive
P13596	Ncam1	-0.107302	0.594229	0.977547	Negative
P59996	Pcsk9	-0.106624	0.596576	0.977547	Negative
P16617	Pgk1	-0.104821	0.602832	0.977547	Negative
P23764	Gpx3	0.103383	0.607844	0.977547	Positive
P14046	A1i3	0.103203	0.608474	0.977547	Positive
P10959	Ces1c	-0.102371	0.611382	0.977547	Negative
D3ZAN3	Ganab	0.101012	0.616144	0.977547	Positive
Q62975	Serpina10	-0.0985278	0.624889	0.977547	Negative
Q9EQV9	Cpb2	0.0975733	0.628263	0.977547	Positive
P06399	Fga	0.0966366	0.631581	0.977547	Positive
P25236	Selenop	0.0958823	0.634258	0.977547	Positive
P10111	Ppia	0.0955266	0.635522	0.977547	Positive
D3ZTX4	Mgam	0.0953964	0.635984	0.977547	Positive
O35217	Minpp1	0.092529	0.646212	0.977547	Positive
P05371	Clu	0.0918049	0.648805	0.977547	Positive
Q6P6V0	Gpi	0.0917884	0.648864	0.977547	Positive
P02091	Hbb	0.0908677	0.652166	0.977547	Positive
Q7TPA5	Serpina11	0.0898924	0.655672	0.977547	Positive
P19999	Mbl1	-0.089588	0.656767	0.977547	Negative
P27139	Ca2	-0.089343	0.657649	0.977547	Negative
P15684	Anpep	0.0888925	0.659273	0.977547	Positive
P24594	Igfbp5	0.0879109	0.662816	0.977547	Positive
P02454	Col1a1	-0.0854717	0.671649	0.977547	Negative
P60901	Psma6	0.0840827	0.676699	0.977547	Positive
F7FAY5	LOC360919	-0.0839051	0.677345	0.977547	Negative
M0R485	Pglyrp2	-0.0833001	0.67955	0.977547	Negative
P04917	Srgn	0.0824081	0.682805	0.977547	Positive
P20759	NA	-0.0837497	0.684188	0.977547	Negative
Q9QZ76	Mb	-0.0794678	0.693572	0.977547	Negative
P18292	F2	0.0773535	0.701352	0.977547	Positive
P14272	Klkb1	0.0765477	0.704324	0.977547	Positive
A0A8I6AHQ8	Blvrb	-0.0751249	0.709583	0.977547	Negative
Q7TMA5	Apob	-0.0750594	0.709825	0.977547	Negative
Q8K3R4	Adipoq	0.0749816	0.710114	0.977547	Positive
P40112	Psmb3	0.0745146	0.711843	0.977547	Positive
P06866	Hp	-0.0741591	0.71316	0.977547	Negative
Q63416	Itih3	0.0730788	0.717169	0.977547	Positive
A0A8J8XL70	Serpinf1	0.0695344	0.730371	0.977547	Positive
D3ZWD6	C8a	0.0684725	0.734341	0.977547	Positive
Q03626	Mug1	0.0682759	0.735077	0.977547	Positive
Q8K3U6	F7	0.0677424	0.737075	0.977547	Positive
Q64268	Serpind1	0.0666805	0.741056	0.977547	Positive
P35704	Prdx2	-0.0666373	0.741218	0.977547	Negative
A0A8I5ZQD3	Fcgbp	-0.0659652	0.743742	0.977547	Negative
Q9QX79	Fetub	-0.0658914	0.744019	0.977547	Negative
F7FMS0	Mst1	0.0656929	0.744765	0.977547	Positive
Q9WUH4	Fhl1	-0.064271	0.750114	0.977547	Negative
A0A8I5Y662	NA	-0.063447	0.753219	0.977547	Negative
Q63207	F10	0.0615196	0.760497	0.977547	Positive
P14630	Apom	0.0597424	0.767225	0.977547	Positive
P14141	Ca3	-0.0584751	0.772034	0.977547	Negative
Q6MG90	C4b	0.0578627	0.77436	0.977547	Positive
P33436	Mmp2	0.059057	0.774439	0.977547	Positive
P12346	Tf	-0.0566934	0.778807	0.977547	Negative
P18424	Lcat	0.055874	0.781928	0.977547	Positive
P69897	Tubb5	0.0536097	0.790567	0.977547	Positive
Q63515	C4bpb	0.0532447	0.791962	0.977547	Positive
P04639	Apoa1	0.0530844	0.792575	0.977547	Positive
Q62894	Ecm1	-0.0529698	0.793014	0.977547	Negative
G3V8K8	Proz	0.0523215	0.795494	0.977547	Positive
P09812	Pygm	0.0484547	0.810326	0.979944	Positive
Q64240	Ambp	-0.0475022	0.81399	0.979944	Negative
Q63621	Il1rap	0.0467838	0.816756	0.979944	Positive
A0A0G2K4I9	F11	-0.0446704	0.824905	0.979944	Negative
P60711	Actb	0.0428923	0.831774	0.979944	Positive
A0A8J8YKQ8	C2	0.0424294	0.833565	0.979944	Positive
D4A3E0	Mmrn1	-0.04213	0.834723	0.979944	Negative
P09006	Serpina3n	0.0420182	0.835156	0.979944	Positive
P31211	Serpina6	0.0419355	0.835476	0.979944	Positive
P08934	Kng1	0.0379402	0.850969	0.979944	Positive
Q08420	Sod3	-0.0369832	0.854689	0.979944	Negative
P01946	Hba1	-0.0367486	0.855601	0.979944	Negative
G3V9R2	Cfh	0.0366938	0.855814	0.979944	Positive
P17475	Serpina1	-0.0366621	0.855937	0.979944	Negative
P11517	NA	-0.0347822	0.863254	0.979944	Negative
B0BNN3	Ca1	0.0338795	0.866771	0.979944	Positive
P20059	Hpx	0.0311306	0.877498	0.979944	Positive
Q6IRK9	Cpq	-0.0299177	0.882237	0.979944	Negative
P29534	Vcam1	0.0293155	0.884592	0.979944	Positive
Q63556	Serpina3m	0.0291123	0.885387	0.979944	Positive
P10960	Psap	-0.0272627	0.892626	0.979944	Negative
P23680	Apcs	0.0259799	0.897651	0.979944	Positive
P28064	Psmb8	-0.0257146	0.898691	0.979944	Negative
P01026	C3	-0.0256484	0.89895	0.979944	Negative
P04937	Fn1	0.0250762	0.901194	0.979944	Positive
Q99PS8	Hrg	0.0214697	0.91535	0.979944	Positive
P08932	NA	-0.021235	0.916272	0.979944	Negative
Q68FP1	Gsn	0.0212118	0.916363	0.979944	Positive
B1H260	F13b	-0.0208394	0.917827	0.979944	Negative
P05545	Serpina3k	-0.0205873	0.918818	0.979944	Negative
O88989	Mdh1	-0.0176083	0.930534	0.979944	Negative
A0A8I5ZVC4	Itih2	-0.0149793	0.940886	0.979944	Negative
P01048	Map1	-0.0140568	0.944521	0.979944	Negative
Q5M7T7	Pla2g7	0.0137777	0.945621	0.979944	Positive
P32038	Cfd	-0.0136716	0.94604	0.979944	Negative
A0A0G2K7F0	Fancm	0.0130676	0.950567	0.979944	Positive
P10354	Chga	0.0119546	0.952808	0.979944	Positive
F7ELL4	Hgfac	-0.0114118	0.954949	0.979944	Negative
Q9JHW0	Psmb7	0.010403	0.958928	0.979944	Positive
A0A0G2K9Y5	LOC681544	0.00998367	0.960582	0.979944	Positive
Q7TQ11	Vtn	0.00879671	0.965266	0.979944	Positive
Q9WTT6	Gda	-0.00882487	0.965872	0.979944	Negative
A0A0G2K896	Inhca	-0.00758004	0.970067	0.979944	Negative
A0A8I6ARV9	Ctsa	0.007088	0.97201	0.979944	Positive
P35859	Igfals	0.00593443	0.976564	0.980533	Positive
Q9WVT0	Adgrf5	-0.00474867	0.982027	0.982027	Negative

## Sheet: sheet_6
feature	compound_name	annotation_level	cor	p	fdr	cor_sign
x00698		unannotated	0.583693	0.00139276	0.561922	Positive
x01120		unannotated	0.559876	0.00239116	0.561922	Positive
x00265		unannotated	0.515215	0.00595592	0.594519	Positive
x00524	[Similar to: GPH; ΔMass: -198.1141 Da]	unannotated	-0.506951	0.00696055	0.594519	Negative
x01351		unannotated	0.502487	0.00756025	0.594519	Positive
x01176	1-Phenyl-1H-pyrazolo[3,4-d]pyrimidin-4-amine	3	-0.497516	0.00827852	0.594519	Negative
x00668		unannotated	0.493785	0.00885454	0.594519	Positive
x01340		unannotated	-0.485588	0.0102384	0.601508	Negative
sl00247	5-Methylcytosine	2a	0.478092	0.011658	0.608806	Positive
x00717		unannotated	-0.45061	0.0183348	0.769643	Negative
x00891	3,3'-Methylenebis([1,2,4]triazolo[4,3-a]pyridine)	3	-0.442282	0.0208878	0.769643	Negative
sl00181	Alanine	2a	-0.439175	0.0219119	0.769643	Negative
x00962	[Similar to: 1-(4-methoxyphenyl)propane-1,2-diol; ΔMass: -93.0789 Da]	unannotated	-0.434353	0.0235819	0.769643	Negative
x00388		unannotated	0.412513	0.032491	0.769643	Positive
x00439		unannotated	0.403158	0.0370533	0.769643	Positive
x00349		unannotated	0.402525	0.0373797	0.769643	Positive
x00461		unannotated	0.401922	0.0376926	0.769643	Positive
sl00207	Phenylalanine	1	-0.401318	0.038008	0.769643	Negative
x00610		unannotated	0.399591	0.0389222	0.769643	Positive
x00771	[Similar to: Methyl 2-[2,6-dioxo-4-(3,4,5-trimethoxyphenyl)piperidino]-4,5-dimethoxybenzoate; ΔMass: -205.2150 Da]	unannotated	-0.397577	0.0400097	0.769643	Negative
x00142	2-Methoxy-5-methylaniline	2b	-0.396389	0.0406631	0.769643	Negative
sl00158	Uracil	2a	-0.393429	0.0423266	0.769643	Negative
sl00301	Prostaglandin E2	2a	-0.393143	0.04249	0.769643	Negative
x01212	[Similar to: 1-(4-methoxyphenyl)propane-1,2-diol; ΔMass: -52.0524 Da]	unannotated	-0.393039	0.0425498	0.769643	Negative
x00138	Indoline	3	-0.388532	0.0451975	0.769643	Negative
x00405	[Similar to: N-(2-hydroxyethyl)-N'-propylthiourea; ΔMass: 41.8899 Da]	unannotated	0.38535	0.0471438	0.769643	Positive
sl00204	Nicotine amide	2a	-0.383651	0.0482095	0.769643	Negative
sl00064	3-Hydroxy-2-methyl-4-pyrone	2a	0.383571	0.0482602	0.769643	Positive
x00896	S-methyl D-thioglycerate	3	0.377166	0.0524545	0.769643	Positive
x01188		unannotated	-0.376931	0.0526131	0.769643	Negative
sl00143	Rhamnose	2a	0.374914	0.053995	0.769643	Positive
x00406		unannotated	0.372708	0.055538	0.769643	Positive
x00925	Ile-cys	3	0.369819	0.0576114	0.769643	Positive
sl00135	N-acetyl-methionine	2a	-0.367887	0.059031	0.769643	Negative
x01251		unannotated	-0.365535	0.0607959	0.769643	Negative
x00421	[Similar to: N'3-(3,5-dibromo-4-hydroxybenzylidene)-5-methylisoxazole-3-carbohydrazide; ΔMass: -253.9044 Da]	unannotated	-0.364707	0.0614268	0.769643	Negative
x01042		unannotated	0.364486	0.0615956	0.769643	Positive
x01226		unannotated	0.362252	0.0633276	0.769643	Positive
sl00197	Isoleucine	1	-0.357363	0.0672478	0.769643	Negative
x01353		unannotated	-0.357074	0.067486	0.769643	Negative
x01012		unannotated	0.355185	0.0690544	0.769643	Positive
x00342	5-Nitro-o-toluidine	3	-0.353687	0.0703178	0.769643	Negative
x00646	7-Chloroemodin	3	0.346267	0.0768412	0.769643	Positive
sl00039	Taurine	1	-0.345662	0.0773928	0.769643	Negative
x00574	N-Acetylvaline	3	-0.343893	0.0790228	0.769643	Negative
x00515		unannotated	0.34379	0.0791188	0.769643	Positive
x00756	[Similar to: 4-(3,4-dimethoxyphenyl)-3-methyl-1H-pyrazol-5-amine; ΔMass: -0.0457 Da]	unannotated	-0.34027	0.0824433	0.769643	Negative
x00757		unannotated	0.339613	0.0830754	0.769643	Positive
sl00256	Creatinine	2a	0.338459	0.0841943	0.769643	Positive
x00710		unannotated	0.337448	0.0851843	0.769643	Positive
x01303	[Similar to: 4-{[2-(4-fluorophenyl)-2-oxoethyl]amino}-4-oxobutanoic acid; ΔMass: -36.9946 Da]	unannotated	0.337095	0.0855317	0.769643	Positive
x00703		unannotated	0.335063	0.0875549	0.769643	Positive
x01225	[Similar to: L-Ergothioneine; ΔMass: -16.9857 Da]	unannotated	0.333746	0.0888845	0.769643	Positive
sl00189	Creatine	1	-0.33263	0.0900234	0.769643	Negative
x00378		unannotated	0.33259	0.0900646	0.769643	Positive
sl00224	1-Methyl Adenosine	1	-0.326999	0.0959396	0.779862	Negative
x00141		unannotated	0.326829	0.0961224	0.779862	Positive
x01044		unannotated	0.325775	0.0972636	0.779862	Positive
x01067		unannotated	0.322777	0.100563	0.779862	Positive
sl00187	Choline	1	-0.321774	0.101686	0.779862	Negative
x00843	Cyclophosphamide	3	0.319374	0.104409	0.779862	Positive
x00773		unannotated	-0.319347	0.104441	0.779862	Negative
x00224	Butylated hydroxytoluene	3	-0.318696	0.105189	0.779862	Negative
sl00041	Threonine	1	-0.317827	0.106194	0.779862	Negative
x00624	Thiomorpholine	3	-0.31412	0.110562	0.789469	Negative
x01156		unannotated	0.312903	0.112024	0.789469	Positive
x00464	Furfural	3	-0.311146	0.114162	0.789469	Negative
sl00015	Galactonic/Gluconic acid	2a	0.308698	0.117188	0.789469	Positive
sl00199	Leucine	1	-0.308637	0.117264	0.789469	Negative
x00348		unannotated	-0.307282	0.118966	0.789469	Negative
x00322		unannotated	0.305749	0.120913	0.789469	Positive
sl00215	Thiamine	1	-0.305728	0.12094	0.789469	Negative
x00277		unannotated	0.300279	0.128051	0.82444	Positive
x00407		unannotated	0.298706	0.130159	0.826687	Positive
x01379		unannotated	-0.296514	0.133139	0.834339	Negative
x01396	[Similar to: 4-{[2-(4-fluorophenyl)-2-oxoethyl]amino}-4-oxobutanoic acid; ΔMass: 11.9292 Da]	unannotated	0.293054	0.137943	0.836953	Positive
x00594	3-Ureidopropionic acid	2a	-0.290534	0.141521	0.836953	Negative
x00356	4-ethylphenylsulfonic acid	3	-0.289777	0.142608	0.836953	Negative
sl00157	Thymidine	2a	-0.285699	0.14857	0.836953	Negative
x01124	Allantoic acid	3	0.284957	0.149674	0.836953	Positive
x00538		unannotated	-0.284006	0.151097	0.836953	Negative
x01377		unannotated	-0.281699	0.154589	0.836953	Negative
x00027	N,N′-diisopropylcarbodiimide	3	-0.280928	0.15577	0.836953	Negative
x00734	glutaral	3	0.280474	0.156468	0.836953	Positive
x00366		unannotated	-0.278181	0.160025	0.836953	Negative
x00539	3,4,5-trimethoxyhydrocinnamic acid	3	-0.27818	0.160028	0.836953	Negative
x01160		unannotated	0.277346	0.161336	0.836953	Positive
x00912	[Similar to: DL-Carnitine; ΔMass: 117.0790 Da]	unannotated	-0.276127	0.163262	0.836953	Negative
x00104	DL-Stachydrine	2b	0.274822	0.165341	0.836953	Positive
sl00081	Anserine	2a	-0.274763	0.165437	0.836953	Negative
sl00012	Citrulline	1	0.273733	0.167091	0.836953	Positive
x01197	3-hydroxy-cis-5-octenoylcarnitine	3	-0.273404	0.167623	0.836953	Negative
x00291		unannotated	0.272734	0.168709	0.836953	Positive
x00243	4-Hydroxy-5-methylfuran-3(2H)-one	3	0.271466	0.170776	0.836953	Positive
x00884		unannotated	0.270993	0.171552	0.836953	Positive
x00726	[Similar to: 1-(3-{[(4-Hydroxypyrimidin-2-yl)thio]methyl}-4-methoxyphenyl)ethan-1-one; ΔMass: -7.1007 Da]	unannotated	0.267753	0.176933	0.836953	Positive
x00426	[Similar to: ethyl 4-oxo-7-(trifluoromethyl)-4H-pyrido[1,2-a]pyrimidine-3-carboxylate; ΔMass: -96.0235 Da]	unannotated	-0.266091	0.17974	0.836953	Negative
x01002		unannotated	0.265415	0.180889	0.836953	Positive
x01191		unannotated	0.26464	0.182213	0.836953	Positive
sl00236	Indole-3-acetic acid	1	0.262725	0.185516	0.836953	Positive
x01102	[Similar to: N-(2-hydroxyethyl)-N'-propylthiourea; ΔMass: -0.1400 Da]	unannotated	0.26237	0.186132	0.836953	Positive
x00073		unannotated	0.258642	0.192695	0.836953	Positive
x00677	Docosahexaenoic acid ethyl ester	2b	-0.258098	0.193665	0.836953	Negative
x00504	3-(propan-2-yl)-octahydropyrrolo[1,2-a]pyrazine-1,4-dione	2b	-0.257681	0.194412	0.836953	Negative
x01255		unannotated	0.255963	0.197508	0.836953	Positive
sl00273	Hexanoyl Glycine	2a	-0.255274	0.19876	0.836953	Negative
x01335		unannotated	-0.254816	0.199593	0.836953	Negative
x00336	Ornithine	1	0.253836	0.201389	0.836953	Positive
sl00131	N-Acetyl-alanine	2a	-0.252996	0.202935	0.836953	Negative
sl00083	Pentose	2a	-0.25273	0.203426	0.836953	Negative
sl00292	N-Acetyl-glycine	1	0.251017	0.20661	0.836953	Positive
x00127		unannotated	0.248735	0.210905	0.836953	Positive
x00935		unannotated	-0.248646	0.211074	0.836953	Negative
x00616	validamine 7-phosphate	3	-0.248464	0.211419	0.836953	Negative
x01154	Acetanilide	3	-0.247255	0.213721	0.836953	Negative
x01013		unannotated	0.246548	0.215076	0.836953	Positive
sl00138	N-Acetyl-tyrosine	2a	0.244899	0.218259	0.836953	Positive
sl00202	Methionine	1	-0.242831	0.222295	0.836953	Negative
x01194		unannotated	-0.241167	0.225578	0.836953	Negative
sl00267	Galactosamine/Glucosamine	2a	-0.240403	0.227096	0.836953	Negative
x00643	(4aS,10aS)-4a,7-Dimethyl-3,4,4a,9,10,10a-hexahydro-2(1H)-phenanthrenone	3	-0.239238	0.229424	0.836953	Negative
x00968	[Similar to: Microcystin LF; ΔMass: -455.2136 Da]	unannotated	0.238941	0.230021	0.836953	Positive
sl00018	Glutamine	2a	-0.237945	0.232027	0.836953	Negative
x01337		unannotated	0.236339	0.235288	0.836953	Positive
x01184	Methyl Yellow	3	0.235471	0.237062	0.836953	Positive
x00307	g-Butyrobetaine	3	-0.235195	0.237628	0.836953	Negative
x00060	D-Xylonic acid	3	0.23451	0.239037	0.836953	Positive
sl00227	2-Aminoadipic acid	2a	-0.234494	0.23907	0.836953	Negative
x00129		unannotated	0.234389	0.239287	0.836953	Positive
x01098	(2R)-2,3-Dihydroxypropyl 2-(palmitoylamino)ethyl phosphate	3	-0.233523	0.241076	0.836953	Negative
x01267		unannotated	0.233299	0.241541	0.836953	Positive
x01292	2-Hydroxyisocaproic acid	2a	-0.233196	0.241756	0.836953	Negative
x00240	BAP	3	-0.230986	0.246374	0.836953	Negative
x00981		unannotated	0.229334	0.249863	0.836953	Positive
x00697	N-((4-AMINO-2-METHYL-5-PYRIMIDINYL)METHYL)FORMAMIDE	3	0.229097	0.250365	0.836953	Positive
sl00011	cis-Aconitic acid	2a	0.228546	0.251539	0.836953	Positive
x00908	[Similar to: N1-[4-(tert-Butyl)phenyl]-2-[(1-methyl-1H-imidazol-2-yl)thio]acetamide; ΔMass: -123.0644 Da]	unannotated	0.227967	0.252774	0.836953	Positive
x00919	methyl 2,5-dimethyl-1H-pyrrole-3-carboxylate	2b	-0.227424	0.253937	0.836953	Negative
x00014	(2E)-3-[3-(Trifluoromethyl)phenyl]acrylic acid	3	0.227302	0.254199	0.836953	Positive
x01175		unannotated	-0.226907	0.255046	0.836953	Negative
x00937		unannotated	0.225915	0.257186	0.836953	Positive
x00591	3,5-Dihydroxybenzoic acid	2b	-0.225473	0.258144	0.836953	Negative
sl00095	Daidzein	2a	0.224565	0.260116	0.836953	Positive
x00548	3-Hydroxy-3-[(3-methylbutanoyl)oxy]-4-(trimethylammonio)butanoate	3	-0.223728	0.261944	0.836953	Negative
x00136	N,N,4-Trimethylaniline	2b	-0.223445	0.262563	0.836953	Negative
x01328	4-(Diethylamino)salicylaldehyde	2b	0.223183	0.263139	0.836953	Positive
x00649	(2S)-5-(Carbamoylamino)-2-[(3-carboxylatopropanoyl)amino]pentanoate	3	0.22232	0.265036	0.836953	Positive
x01395		unannotated	0.221924	0.26591	0.836953	Positive
x00105		unannotated	0.220056	0.27006	0.836953	Positive
sl00045	Uric acid	1	-0.220007	0.270169	0.836953	Negative
x00404		unannotated	0.219964	0.270264	0.836953	Positive
x00727	(2E)-octenoylcarnitine	3	0.219323	0.271697	0.836953	Positive
sl00057	2/3-Hydroxybutyric acid	2a	0.218986	0.272455	0.836953	Positive
x00455	[Similar to: (2R,3S,4S,5R,6R)-2-({[(2R,3R,4R,5S)-3,4-dihydroxy-5-(hydroxymethyl)oxolan-2-yl]oxy}methyl)-6-{[(2E)-3,7-dimethylocta-2,6-dien-1-yl]oxy}oxane-3,4,5-triol; ΔMass: -258.1615 Da]	unannotated	0.215216	0.281	0.842892	Positive
x00555	Dobesilic acid	3	-0.214767	0.282029	0.842892	Negative
x01281	N-(2-oxolanylmethyl)-1-phenyl-4-pyrazolo[3,4-d]pyrimidinamine	3	0.214102	0.283557	0.842892	Positive
x01179	2-Phenylcyclopropanamine	3	-0.21352	0.284901	0.842892	Negative
sl00147	Serine	1	-0.212946	0.286227	0.842892	Negative
x00837	[Similar to: 2-(5-chloro-3-methyl-1-benzothiophen-2-yl)acetohydrazide; ΔMass: 7.9583 Da]	unannotated	0.211298	0.290062	0.842892	Positive
x01030		unannotated	0.21086	0.291086	0.842892	Positive
x00720		unannotated	0.21024	0.292539	0.842892	Positive
x00389	5alpha-androstane-3alpha-glcosyl-17beta-diol	3	-0.209619	0.294	0.842892	Negative
x00744		unannotated	0.208882	0.29574	0.842892	Positive
x00638	triazacyclononane	3	-0.208527	0.296579	0.842892	Negative
sl00219	Valine	1	-0.208108	0.297574	0.842892	Negative
sl00176	4-Guanidinobutyric acid	1	-0.208054	0.297702	0.842892	Negative
x00783		unannotated	0.207293	0.299512	0.842939	Positive
x01414	HOxAsH-bis(1,2-ethanedithiol)	3	-0.205721	0.303272	0.8462	Negative
x00219	Deanol	3	-0.204738	0.305641	0.8462	Negative
x00261	gaboxadol	3	0.204559	0.306072	0.8462	Positive
x01016	Ethyl L-methioninate	3	-0.20316	0.309463	0.850572	Negative
x01045	[Similar to: (3beta,5xi,9xi)-3-[(6-Deoxy-beta-D-glucopyranosyl)oxy]urs-12-ene-27,28-dioic acid; ΔMass: -277.1566 Da]	unannotated	-0.201083	0.314543	0.858288	Negative
x00357	D-Mannoheptulose	3	0.200375	0.316285	0.858288	Positive
x01333	5-Chlorooctyl acetate	3	-0.199782	0.317749	0.858288	Negative
x00675		unannotated	0.198346	0.321312	0.858392	Positive
x00423	[Similar to: 5-hydroxy-6,8-dimethoxy-7-{[(2S,3R,4S,5S,6R)-3,4,5-trihydroxy-6-(hydroxymethyl)oxan-2-yl]oxy}-2H-chromen-2-one; ΔMass: -217.0134 Da]	unannotated	0.198294	0.32144	0.858392	Positive
x00818	[Similar to: N-(3-methylphenyl)-2-(3-pyridinyl)-1-pyrrolidinecarboxamide; ΔMass: -174.0943 Da]	unannotated	-0.19625	0.326555	0.8645	Negative
x00657	4-Methyl-N-(4-pyridinylmethyl)benzenesulfonamide	3	-0.195912	0.327406	0.8645	Negative
sl00194	Glycine	2a	-0.191773	0.33793	0.878512	Negative
x01189	[Similar to: 2,3-dimethoxy-5-(6,7,8-trimethoxy-3,4-dihydro-2H-1-benzopyran-3-yl)cyclohexa-2,5-diene-1,4-dione; ΔMass: -258.1514 Da]	unannotated	-0.191557	0.338485	0.878512	Negative
x01210		unannotated	0.190901	0.340173	0.878512	Positive
x00229	Pyrrolidine	3	-0.190438	0.341366	0.878512	Negative
x00960	5-Hydroxytryptophol	3	0.189822	0.34296	0.878512	Positive
x01196		unannotated	-0.189449	0.343928	0.878512	Negative
sl00038	Succinic acid	2a	-0.186778	0.3509	0.883467	Negative
x00472	[Similar to: 6-[4-(3,4-dimethoxyphenyl)-hexahydrofuro[3,4-c]furan-1-yl]-4-methoxy-2H-1,3-benzodioxole; ΔMass: -136.3069 Da]	unannotated	0.186699	0.351106	0.883467	Positive
x00673	[Similar to: N-(3,5-dimethyl-4-isoxazolyl)-N'-{[1-(phenylsulfonyl)-4-piperidinyl]methyl}urea; ΔMass: -265.1273 Da]	unannotated	-0.186546	0.351507	0.883467	Negative
sl00190	Cytidine	1	-0.183864	0.358598	0.886196	Negative
x00684	Nitrosoheptamethyleneimine	2b	0.183418	0.359787	0.886196	Positive
x00996	[Similar to: 5-[(4-Methylbenzyl)thio]-1,3,4-thiadiazol-2-amine; ΔMass: 55.9613 Da]	unannotated	0.183199	0.360371	0.886196	Positive
x00036	[Similar to: Udenafil; ΔMass: -314.2066 Da]	unannotated	-0.183135	0.360542	0.886196	Negative
sl00001	2-(hydroxymethyl)butanoic/2-Ethylhydracrylic acid	2a	0.182581	0.362021	0.886196	Positive
x01010		unannotated	0.180598	0.367346	0.89058	Positive
sl00128	Lactic acid	1	-0.18027	0.368232	0.89058	Negative
x01318	4-vinylphenol sulfate	3	-0.179179	0.371186	0.89058	Negative
x00924	convicine	3	-0.178616	0.372716	0.89058	Negative
x01411		unannotated	-0.177601	0.375483	0.89058	Negative
x00963		unannotated	-0.17676	0.377786	0.89058	Negative
sl00141	Pyruvic acid	2a	-0.176228	0.379245	0.89058	Negative
sl00153	Taurochenodeoxycholic acid	2a	0.175822	0.380363	0.89058	Positive
x00806	2-(1-Naphthyl)-2-oxoethyl thiocyanate	3	0.175639	0.380865	0.89058	Positive
x01356	capuride	3	0.174326	0.384491	0.891107	Positive
x00992	N-(3-acetamidopropyl)pyrrolidin-2-one	3	-0.173678	0.38629	0.891107	Negative
x00846	4-Methoxyaniline	3	-0.172875	0.388523	0.891107	Negative
x00829	2-Pyrrolidone	3	-0.172297	0.390137	0.891107	Negative
x01376	3-hydroxy-cis-5-octenoylcarnitine	3	-0.172141	0.39057	0.891107	Negative
x00266	3-Methylhistidine	1	0.169819	0.39709	0.901561	Positive
x00247		unannotated	-0.169147	0.398989	0.901561	Negative
sl00090	Carnosine	2a	-0.169685	0.40727	0.915871	Negative
x01234	N-(4,5-dimethyl-2-thiazolyl)cyclohexanecarboxamide	3	-0.162863	0.416989	0.916085	Negative
x01041		unannotated	-0.162779	0.417232	0.916085	Negative
sl00067	Indole-3-acrylic acid	2a	0.162694	0.417478	0.916085	Positive
x00228	[Similar to: 3-[4,8,11-tri(2-cyanoethyl)-1,4,8,11-tetraazacyclotetradecanyl]propanenitrile; ΔMass: -259.1797 Da]	unannotated	-0.162379	0.418393	0.916085	Negative
x01258		unannotated	0.161405	0.421227	0.916085	Positive
x01367		unannotated	-0.161313	0.421496	0.916085	Negative
x01137	Glyphosate	3	0.160406	0.424144	0.916085	Positive
sl00165	α-aminobutyric acid	2a	0.16038	0.424221	0.916085	Positive
x00283	Urocanic acid	1	0.159512	0.426767	0.916085	Positive
sl00108	Glycocholic acid	2a	0.157833	0.431712	0.916085	Positive
sl00134	N-Acetyl-phenylalanine	2a	-0.157485	0.432742	0.916085	Negative
x01374	[Similar to: (1R,9R)-5-Cyclohexyl-11-(propylsulfonyl)-7,11-diazatricyclo[7.3.1.02,7]trideca-2,4-dien-6-one; ΔMass: -172.1016 Da]	unannotated	0.157469	0.432788	0.916085	Positive
sl00299	2-Hydroxyphenylacetic acid/ Vanillin	2a	0.155796	0.437755	0.916085	Positive
x00114	[Similar to: 2-(3,4-dihydroisoquinolin-1-yl)-N-propylhydrazine-1-carboxamide; ΔMass: -58.0989 Da]	unannotated	0.155495	0.438652	0.916085	Positive
x00619	[Similar to: N-{[(2R,4S,5R)-5-Ethyl-1-azabicyclo[2.2.2]oct-2-yl]methyl}-2-furamide; ΔMass: -96.0211 Da]	unannotated	-0.154839	0.44061	0.916085	Negative
x01122	2-Acetylphenanthrene	3	-0.15461	0.441294	0.916085	Negative
sl00044	Tyrosine	1	0.15444	0.441801	0.916085	Positive
x01095	DL-4-Hydroxyphenyllactic acid	2b	0.154224	0.44245	0.916085	Positive
x00807	[Similar to: N-Cyclopropyl-2-[(2S,3R,4S,5R)-5-({[(3,5-dimethoxyphenyl)carbamoyl]amino}methyl)-3,4-dihydroxytetrahydro-2-furanyl]acetamide; ΔMass: -257.1341 Da]	unannotated	0.152968	0.446219	0.919837	Positive
sl00266	Hexose	2a	-0.151637	0.450234	0.924061	Negative
x00964	3-Hydroxydecanoic acid	2b	-0.150325	0.454207	0.925353	Negative
x00739	[Similar to: N1-bicyclo[2.2.1]hept-5-en-2-yl-2-(5-fluoro-2-oxo-2,3-dihydro-1H-indol-3-yliden)hydrazine-1-carbothioamide; ΔMass: -98.2024 Da]	unannotated	-0.150075	0.454966	0.925353	Negative
x00670	4-heptyl-3-methyl-1H-pyrazol-5-ol	2b	-0.149482	0.45677	0.925353	Negative
x00533	galegine	3	-0.148221	0.460621	0.92725	Negative
x00666		unannotated	0.147759	0.462035	0.92725	Positive
x00627	[Similar to: N-tetrahydrothiophen-3-yl-N'-(2,3,4-trichlorophenyl)urea; ΔMass: 5.9426 Da]	unannotated	0.146528	0.465816	0.92725	Positive
x00699		unannotated	0.146485	0.465948	0.92725	Positive
x01113		unannotated	-0.14525	0.469755	0.92725	Negative
x00768	Edaravone	3	-0.144385	0.472436	0.92725	Negative
x00831	[Similar to: N-[2-(1,5-dimethyl-4-nitro-1H-pyrazol-3-yl)vinyl]-N,N-dimethylamine; ΔMass: -42.9694 Da]	unannotated	-0.14317	0.476209	0.92725	Negative
sl00091	Cholic acid	1	-0.142672	0.477758	0.92725	Negative
x00041	2,4-Xylidine	2b	-0.142532	0.478196	0.92725	Negative
x00651	[Similar to: N-tetrahydrothiophen-3-yl-N'-(2,3,4-trichlorophenyl)urea; ΔMass: 27.9246 Da]	unannotated	0.139782	0.486813	0.92725	Positive
x00556	Diethyl phthalate	3	-0.138923	0.489523	0.92725	Negative
x01180	[Similar to: 1-chloro-2-[({[(1-cyclopropylethylidene)amino]oxy}carbonyl)amino]benzene; ΔMass: -108.0420 Da]	unannotated	-0.138898	0.4896	0.92725	Negative
x00456	ARECOLINE	3	-0.138338	0.491371	0.92725	Negative
x00888	[Similar to: ethyl 2-[({[3-(2,6-dichlorophenyl)-5-methylisoxazol-4-yl]amino}carbonyl)amino]-4-methylthiophene-3-carboxylate; ΔMass: -296.0119 Da]	unannotated	0.136619	0.49682	0.92725	Positive
x00630	Ethyl lactate	3	-0.135697	0.499758	0.92725	Negative
x00979	[Similar to: N-[2-(1,5-dimethyl-4-nitro-1H-pyrazol-3-yl)vinyl]-N,N-dimethylamine; ΔMass: 0.9862 Da]	unannotated	-0.135328	0.500937	0.92725	Negative
sl00115	Hippuric acid	1	-0.134218	0.504486	0.92725	Negative
x00894	[Similar to: Perazine; ΔMass: -199.0456 Da]	unannotated	-0.13392	0.505443	0.92725	Negative
x00302		unannotated	0.133386	0.507156	0.92725	Positive
x00568	1-Oxo-1,2,4-butanetricarboxylic acid	3	0.13285	0.508881	0.92725	Positive
x01058		unannotated	0.132082	0.511355	0.92725	Positive
x01317	Ethyl acetate	3	-0.131814	0.51222	0.92725	Negative
x00742	9-methylhypoxanthine	3	-0.131739	0.512461	0.92725	Negative
x01056	[Similar to: 3-hydroxy-2-(3-nitro-4-piperidinobenzyl)propanenitrile; ΔMass: -130.0547 Da]	unannotated	0.131632	0.512807	0.92725	Positive
x00408		unannotated	0.131381	0.513619	0.92725	Positive
sl00151	Tauro-a/b-Muricholic acid	2a	0.131155	0.514351	0.92725	Positive
x00385	Allantoin	1	-0.131035	0.514739	0.92725	Negative
x00582		unannotated	0.130808	0.515472	0.92725	Positive
sl00156	Tauroursodeoxycholic acid	2a	-0.129707	0.519046	0.92725	Negative
x00674	(4S,5R)-4,5-Dihydroxy-3-oxo-1-cyclohexene-1-carboxylate	3	0.129356	0.520187	0.92725	Positive
sl00169	N-Acetyl-ornithine	2a	-0.129068	0.521124	0.92725	Negative
x01419		unannotated	-0.128323	0.523551	0.92725	Negative
x00862	1-Vinylimidazole	2b	-0.12587	0.531584	0.92725	Negative
x01085	4,4'-Bipyridine	2b	0.125374	0.533218	0.92725	Positive
x01417		unannotated	0.125326	0.533376	0.92725	Positive
x01227	Dipropyl sulfite	3	-0.125078	0.534192	0.92725	Negative
x00097	Serotonin	1	-0.124718	0.535377	0.92725	Negative
x01177	2-pentan-3-yl-1H-imidazole	3	-0.123167	0.540505	0.92725	Negative
x00004	Carnitine	1	-0.122969	0.541163	0.92725	Negative
x00685		unannotated	0.12193	0.54461	0.92725	Positive
x01398		unannotated	-0.121207	0.547017	0.92725	Negative
sl00085	Arginine	1	0.121168	0.547149	0.92725	Positive
x00976		unannotated	-0.12341	0.548089	0.92725	Negative
x01343	1-O-Arsonopentofuranose	3	-0.120588	0.549082	0.92725	Negative
x00256	Malondialdehyde	3	0.119749	0.551886	0.92725	Positive
sl00129	Leucyl-alanine	2a	-0.119439	0.552922	0.92725	Negative
x00792	[Similar to: Chlorhexidine; ΔMass: -380.1031 Da]	unannotated	-0.11888	0.554796	0.92725	Negative
x00365	2-Nitro-9H-fluorene	3	0.11792	0.558018	0.92725	Positive
sl00030	Pantothenic acid	1	-0.116949	0.561287	0.92725	Negative
x01263		unannotated	0.116266	0.563593	0.92725	Positive
x00172	[Similar to: Acetyl-L-carnitine; ΔMass: 28.0345 Da]	unannotated	0.115916	0.564774	0.92725	Positive
x00778	6-Methylquinoline	2b	-0.115532	0.566076	0.92725	Negative
x00087	5',6'-Diamino-1,3'-bis(2-deoxy-beta-D-erythro-pentofuranosyl)-4',5'-dihydro-4,4'-bipyrimidine-2,2'(1H,3'H)-dione	3	0.115309	0.566828	0.92725	Positive
x00672	Hexanoylcarnitine	2b	0.114582	0.569294	0.92725	Positive
x01243	[Similar to: 1-(3,4-dimethoxyphenyl)ethan-1-one oxime; ΔMass: -102.0556 Da]	unannotated	-0.114106	0.57091	0.92725	Negative
x01052	2-[3-carboxylato-3-(methylammonio)propyl]-L-histidine dizwitterion	3	0.113956	0.571419	0.92725	Positive
x00053	Proline	1	0.113911	0.571573	0.92725	Positive
x00440	Dihydroxyindole	3	0.112888	0.575055	0.92725	Positive
x01342	2-Hydroxy-4-(methylthio)butanoic acid	3	0.112756	0.575503	0.92725	Positive
x00328	2,2,6,6-Tetramethyl-4-piperidinol	2b	0.112368	0.576828	0.92725	Positive
x00536		unannotated	-0.114345	0.578073	0.92725	Negative
x01198	Glutaric acid	2a	-0.111432	0.580025	0.92725	Negative
x00147		unannotated	-0.109419	0.586929	0.928172	Negative
sl00008	Asparagine	2a	-0.109403	0.586985	0.928172	Negative
x01357	Kynurenic acid	2a	0.108741	0.589263	0.928172	Positive
x00748		unannotated	0.108391	0.590471	0.928172	Positive
x01252		unannotated	0.105466	0.600591	0.928172	Positive
x00527		unannotated	0.104612	0.603561	0.928172	Positive
x01051	6-Methylindole	2b	0.104417	0.604238	0.928172	Positive
x01237	2-Oxoglutarate dianion	3	0.10431	0.604611	0.928172	Positive
x01086		unannotated	-0.104264	0.604771	0.928172	Negative
x00799	5-guanidino-2-oxopentanoic acid	3	0.104148	0.605176	0.928172	Positive
x00851	carboxynorspermidine	3	-0.103957	0.60584	0.928172	Negative
x01254	PFPeA	3	0.103066	0.608953	0.928172	Positive
x00119	2-Oxobutyric acid	3	0.102635	0.610457	0.928172	Positive
x01065		unannotated	0.10237	0.611386	0.928172	Positive
x00373	4-(2-Hydroxyethyl)phenyl hydrogen sulfate	3	-0.10226	0.611769	0.928172	Negative
x00821	cis-4-Decenoyl carnitine	3	0.100862	0.616669	0.928172	Positive
x01054	Fluorodopa	3	-0.100733	0.617124	0.928172	Negative
sl00062	3-(3-Hydroxyphenyl)propionic acid	1	0.100294	0.618665	0.928172	Positive
x01075	Benserazide	3	-0.100026	0.619611	0.928172	Negative
x00762		unannotated	0.0997786	0.62048	0.928172	Positive
x00835	1,2-Cyclohexanediamine	3	-0.0988745	0.623666	0.928172	Negative
x01139		unannotated	-0.0987663	0.624048	0.928172	Negative
sl00294	N-Acetyl-tryptophan	2a	0.0977393	0.627676	0.930624	Positive
x00863	1-octadecanoyl-2-(7Z,10Z,13Z,16Z-docosatetraenoyl)-sn-glycero-3-phosphocholine	3	-0.0986105	0.631755	0.93113	Negative
x01413		unannotated	0.0965242	0.63198	0.93113	Positive
x00801	[Similar to: 1-[(2-chlorophenyl)sulfonyl]-3-methyl-4-(2-methylallyl)-4,5-dihydro-1H-pyrazol-5-one; ΔMass: 34.1480 Da]	unannotated	0.0945681	0.638932	0.936596	Positive
x00274	Mefenamic acid	3	-0.0938309	0.64156	0.936596	Negative
x01218		unannotated	0.0935196	0.642671	0.936596	Positive
sl00310	Testosterone	2a	-0.0932426	0.643661	0.936596	Negative
sl00043	Tryptophan	1	0.0924153	0.646619	0.937568	Positive
x00595	1,8-Diazabicyclo [5.4.0]undec-7-ene	2b	-0.0908116	0.652368	0.937568	Negative
x00493	(8S,9S)-6-[(2R)-1-hydroxypropan-2-yl]-8-methyl-9-[[methyl(pyridin-4-ylmethyl)amino]methyl]-10-oxa-1,6,14,15-tetrazabicyclo[10.3.0]pentadeca-12,14-dien-5-one	3	-0.0890203	0.658812	0.937568	Negative
x00796		unannotated	0.0886855	0.660019	0.937568	Positive
x00209		unannotated	0.0874296	0.664555	0.937568	Positive
x00072	Urea	2a	-0.0870814	0.665815	0.937568	Negative
sl00297	N-Acetyl-glutamine	2a	-0.0866137	0.667508	0.937568	Negative
x01078	Hydrogen bromide	3	0.0858408	0.67031	0.937568	Positive
x00572	p-Cresylsulfate	3	-0.0850935	0.673023	0.937568	Negative
sl00290	N-Acetyl-aspartic acid	2a	0.0850668	0.67312	0.937568	Positive
x00413	4-(2-Methoxyphenoxy)-N-(3-pyridinyl)benzenesulfonamide	3	-0.0846496	0.674636	0.937568	Negative
x01024	[Similar to: 2-[2-(2-propynylsulfanyl)phenyl]-1,4,5,6-tetrahydropyrimidine hydrobromide; ΔMass: 86.1485 Da]	unannotated	-0.0832659	0.679674	0.937568	Negative
sl00298	Octanoylcarnitine	2a	0.0810793	0.687663	0.937568	Positive
x00765		unannotated	0.0805308	0.689672	0.937568	Positive
x01352	[Similar to: 4-{[2-(4-fluorophenyl)-2-oxoethyl]amino}-4-oxobutanoic acid; ΔMass: 25.9084 Da]	unannotated	0.0800292	0.691512	0.937568	Positive
x00309	Uridine	2a	0.08002	0.691546	0.937568	Positive
x01146	1,2,3,4,6,7,8-Heptachlorodibenzofuran	3	0.0792058	0.694535	0.937568	Positive
x01287	2-Acetylphenanthrene	3	0.0789298	0.695549	0.937568	Positive
x01107	[Similar to: 4-{[2-(4-fluorophenyl)-2-oxoethyl]amino}-4-oxobutanoic acid; ΔMass: -23.0869 Da]	unannotated	0.0786922	0.696422	0.937568	Positive
x00254		unannotated	-0.078628	0.696659	0.937568	Negative
x01369		unannotated	0.078425	0.697405	0.937568	Positive
x00489	2-Hydroxyquinoline	2b	0.0780004	0.698968	0.937568	Positive
x00713		unannotated	0.077692	0.700104	0.937568	Positive
x00285	(2S,6S)-2-Ammonio-6-[(3-carboxylatopropanoyl)amino]heptanedioate	3	-0.0773676	0.701299	0.937568	Negative
x01115	Isatin	3	0.076957	0.702814	0.937568	Positive
x01390	Idebenone	3	-0.0764648	0.70463	0.937568	Negative
x01202		unannotated	0.0756622	0.707595	0.937568	Positive
x00495	Histamine	2b	-0.0745499	0.711712	0.937568	Negative
x00784	Pinolenic acid	2b	0.0735327	0.715484	0.937568	Positive
x00631	[Similar to: 14,15-Leukotriene E4; ΔMass: -279.3311 Da]	unannotated	0.0733397	0.7162	0.937568	Positive
x01171	5-Methoxy-1H-indol-6-yl Î²-D-glucopyranosiduronic acid	3	0.072886	0.717885	0.937568	Positive
x00581	2-Ammonio-3-(3-oxo-1-propen-1-yl)-2-butenedioate	3	-0.0714307	0.723298	0.937568	Negative
x00330		unannotated	0.0713742	0.723509	0.937568	Positive
x00780		unannotated	0.0712754	0.723877	0.937568	Positive
x00179	[Similar to: N-[4,5-dihydroxy-2-({4-[hydroxy(phenyl)methyl]-5-oxo-3-phenyl-2,5-dihydrofuran-2-yl}oxy)-6-(methoxymethyl)oxan-3-yl]acetamide; ΔMass: -382.1044 Da]	unannotated	-0.0710154	0.724845	0.937568	Negative
x00178	Pulcherriminic acid	3	-0.0710154	0.724845	0.937568	Negative
x01360	Coumachlor	3	0.0709651	0.725032	0.937568	Positive
x00485	7-ketodeoxycholic acid	3	0.0709536	0.725076	0.937568	Positive
sl00248	7-Methylguanine	1	-0.0703684	0.727257	0.937568	Negative
x00422		unannotated	-0.0686684	0.733608	0.937568	Negative
x00810	N-Benzylformamide	2b	0.0685809	0.733936	0.937568	Positive
x00965	2-[[2-(3,5-dimethyl-1-pyrazolyl)-6-methyl-4-pyrimidinyl]amino]ethanol	3	0.0677316	0.737115	0.937568	Positive
x00774		unannotated	-0.0673068	0.738707	0.937568	Negative
x00163	Methyl Î²-D-glucuronide	3	-0.0663797	0.742185	0.937568	Negative
x00653	HIL	3	-0.0658374	0.744222	0.937568	Negative
x00486	4-Phenolsulfonic acid	2b	0.0658312	0.744245	0.937568	Positive
x00803	Toxopyrimidine	3	0.0650736	0.747093	0.937568	Positive
sl00308	Sugar alcohol (C6)	2a	-0.0645926	0.748903	0.937568	Negative
x00078	Histidine	1	0.0642943	0.750027	0.937568	Positive
x00076	[Similar to: N-allyl-2-(2-methyl-1-benzofuran-3-yl)acetamide; ΔMass: -51.9738 Da]	unannotated	-0.064244	0.750216	0.937568	Negative
sl00068	3-Methyl-2-oxovaleric acid	2a	0.0638443	0.751722	0.937568	Positive
x00372	acetylspermine	3	0.0634808	0.753092	0.937568	Positive
x00641		unannotated	-0.0611503	0.761894	0.937568	Negative
sl00166	a/b/ω-Muricholic acid	2a	-0.0619067	0.763851	0.937568	Negative
x00634	[Similar to: N1-bicyclo[2.2.1]hept-5-en-2-yl-2-(5-fluoro-2-oxo-2,3-dihydro-1H-indol-3-yliden)hydrazine-1-carbothioamide; ΔMass: -120.1842 Da]	unannotated	-0.060352	0.764916	0.937568	Negative
x01372	2,2'-({2-[(Carboxylatomethyl)amino]ethyl}ammonio)diacetate	3	0.0597737	0.767107	0.937568	Positive
x01145	[Similar to: Evonine; ΔMass: -542.1590 Da]	unannotated	0.0596983	0.767393	0.937568	Positive
x01257		unannotated	0.0592874	0.768951	0.937568	Positive
x01232		unannotated	-0.0589894	0.770081	0.937568	Negative
x00162	Dimethyl fumarate	3	0.0586679	0.771302	0.937568	Positive
sl00278	Homocysteine	2a	0.0580164	0.773776	0.937568	Positive
x01273	Menadione bisulfite	3	-0.0578709	0.774329	0.937568	Negative
x00877	N,N-Dimethyl-N-phenylurea	3	-0.0575248	0.775644	0.937568	Negative
sl00211	Pyridoxal	1	0.0564007	0.779921	0.937568	Positive
x01361	p-Cresol	3	-0.0566678	0.783347	0.937568	Negative
x00024		unannotated	0.0551545	0.78467	0.937568	Positive
x01141	1-(2,1,3-benzoxadiazol-4-yloxy)-3,3-dimethyl-1-(1,2,4-triazol-1-yl)-2-butanone	3	-0.0549516	0.785444	0.937568	Negative
sl00118	Homocitrulline	2a	-0.0543259	0.787832	0.937568	Negative
x00208	Methionine sulfoxide	2a	-0.0542879	0.787977	0.937568	Negative
sl00223	Indole-3-carboxyaldehyde	1	0.0538989	0.789463	0.937568	Positive
x01173	N(4)-phosphoagmatine	3	0.0525794	0.794507	0.937568	Positive
x00355	4-Hydroxyproline	2a	0.052225	0.795863	0.937568	Positive
sl00272	Guanidoacetic acid	2a	0.0521631	0.7961	0.937568	Positive
x00098	Xanthurenate	3	0.0520801	0.796418	0.937568	Positive
x01262	2-Oxindole	2b	0.0520003	0.796723	0.937568	Positive
x00525		unannotated	-0.0516564	0.79804	0.937568	Negative
x00907		unannotated	0.0515837	0.798319	0.937568	Positive
sl00036	Pyroglutamic acid	2a	0.0511644	0.799925	0.937568	Positive
x01018	Glyceric acid	1	-0.049172	0.80757	0.944174	Negative
x00353	L-Ascorbic acid 2-sulfate	2b	-0.0478578	0.812622	0.946977	Negative
x00608	D-(−)-Erythrose	3	0.0468049	0.816675	0.946977	Positive
sl00289	N8-Acetylspermidine	2a	0.0467033	0.817066	0.946977	Positive
x00588	lys-gln	3	-0.0464538	0.818027	0.946977	Negative
x01384		unannotated	0.0457936	0.820572	0.947589	Positive
x00379	Biacetyl	3	0.0450157	0.823572	0.948723	Positive
sl00122	Indole-3-carboxylate	2a	0.0437107	0.828611	0.950065	Positive
x00063		unannotated	-0.043653	0.828834	0.950065	Negative
sl00229	2-Methylbutyrylglycine	2a	0.0424122	0.833632	0.950065	Positive
x00431	Levulinic acid	3	0.0419567	0.835394	0.950065	Positive
x00521	[Similar to: 6-[4-(3,4-dimethoxyphenyl)-hexahydrofuro[3,4-c]furan-1-yl]-4-methoxy-2H-1,3-benzodioxole; ΔMass: -140.1482 Da]	unannotated	0.0416219	0.83669	0.950065	Positive
sl00003	2-Oxoglutaric acid	2a	-0.0394119	0.845256	0.950065	Negative
x00397	2-[(1,5-dimethyl-2-benzimidazolyl)amino]ethanol	3	0.0390924	0.846496	0.950065	Positive
x01235	3-(1-hydroxyethyl)-2,3,6,7,8,8a-hexahydropyrrolo[1,2-a]pyrazine-1,4-dione	2b	0.0386516	0.848207	0.950065	Positive
x00002		unannotated	-0.0385147	0.848738	0.950065	Negative
x01064	6-Methylquinoline	2b	0.0383384	0.849423	0.950065	Positive
x01125	N'-[(3-nitro-6-oxo-1-cyclohexa-2,4-dienylidene)methyl]-1H-indole-3-carbohydrazide	3	-0.037773	0.851619	0.950065	Negative
sl00225	1-Phenylethyl acetate	2a	-0.0369543	0.854801	0.950065	Negative
x01288	[Similar to: 1,3-dimethyl-5-(morpholinosulfonyl)indolin-2-one; ΔMass: -67.0786 Da]	unannotated	-0.0351965	0.86164	0.950065	Negative
x00331		unannotated	0.034955	0.862581	0.950065	Positive
x00733	Carbaryl	3	-0.0344605	0.864507	0.950065	Negative
x00074		unannotated	-0.0344434	0.864574	0.950065	Negative
x00510	10-HDA	2b	-0.0339913	0.866336	0.950065	Negative
x01349	[Similar to: Benthiavalicarb isopropyl; ΔMass: -50.1678 Da]	unannotated	-0.0339334	0.866562	0.950065	Negative
sl00127	Kynurenine	2a	-0.0331406	0.869652	0.950065	Negative
x00593	1-(4-Nitrophenyl)ethanone	3	-0.0328773	0.87068	0.950065	Negative
x01059	2-(5-Amino-4-cyano-1H-imidazol-1-yl)-5-(4-methyl-1-piperazinyl)benzoic acid	3	0.0327292	0.871257	0.950065	Positive
x01418	validamine 7-phosphate	3	0.0324072	0.872514	0.950065	Positive
sl00076	4-Methyl-2-oxovaleric acid	2a	0.031637	0.87552	0.950065	Positive
x01407	2-(5-Amino-4-cyano-1H-imidazol-1-yl)-5-(4-methyl-1-piperazinyl)benzoic acid	3	0.0314672	0.876183	0.950065	Positive
x01400	delta-guanidinovaleric acid	3	-0.0309769	0.878098	0.950065	Negative
x00338	Benserazide	3	-0.0308788	0.878481	0.950065	Negative
x00315		unannotated	-0.0302285	0.881022	0.950065	Negative
x00130	[Similar to: 4-{[2-(4-fluorophenyl)-2-oxoethyl]amino}-4-oxobutanoic acid; ΔMass: -117.1731 Da]	unannotated	-0.0301481	0.881337	0.950065	Negative
x01363	[Similar to: N,N-Diethyl-3-[(2S,5aS,8aR)-1-methyl-5-oxodecahydropyrrolo[3,2-E][1,4]diazepin-2-yl]propanamide; ΔMass: -142.1469 Da]	unannotated	-0.0289409	0.886057	0.9516	Negative
sl00286	Melatonin	2a	-0.0279889	0.889782	0.9516	Negative
x00904	Ecgonine	2b	0.0279691	0.88986	0.9516	Positive
x00505	2-Oxindole	2b	-0.0272956	0.892497	0.9516	Negative
x01274		unannotated	-0.0267992	0.894441	0.9516	Negative
x00945	[Similar to: 2-({2-[(1,3-Dimethyl-1H-pyrazol-5-yl)amino]-2-oxoethyl}sulfanyl)acetic acid; ΔMass: -148.0069 Da]	unannotated	-0.0266798	0.894909	0.9516	Negative
x00035	[Similar to: 1,10-Diamino-4,7-dioxadecane; ΔMass: -13.0316 Da]	unannotated	-0.0250821	0.901171	0.954244	Negative
x00171		unannotated	-0.0250093	0.901456	0.954244	Negative
sl00054	2′-Deoxycytidine	1	0.0225804	0.910987	0.962166	Positive
x00215		unannotated	0.022047	0.913082	0.962217	Positive
x00079	[Similar to: N-(2,5-diethoxy-4-morpholinophenyl)acetamide; ΔMass: -140.1225 Da]	unannotated	0.0209393	0.917434	0.96357	Positive
sl00125	3-Indoxylsulfuric acid	1	-0.0206765	0.918467	0.96357	Negative
sl00016	Glutamic acid	1	0.0189664	0.925191	0.968463	Positive
x01248	(2S)-2-amino-N'-[(4-methyl-2,6-dioxo-5-pyrimidinylidene)methyl]-3-phenylpropanehydrazide	3	-0.0181157	0.928538	0.969806	Negative
x00830	[Similar to: R-Palmitoyl-(1-methyl) Ethanolamide; ΔMass: -96.1256 Da]	unannotated	-0.0166396	0.934348	0.972615	Negative
x01275		unannotated	0.016381	0.935366	0.972615	Positive
sl00232	2-Picolinic acid	2a	0.0153812	0.939303	0.974553	Positive
x00143	[Similar to: Acetyl-L-carnitine; ΔMass: 14.0202 Da]	unannotated	0.0140708	0.944466	0.977751	Positive
x00961	indoline-2-carboxylic acid	2b	0.0129685	0.948811	0.98009	Positive
x00987		unannotated	0.0120968	0.952248	0.981483	Positive
x00173	[Similar to: N-(2-hydroxyethyl)-N'-propylthiourea; ΔMass: -3.1746 Da]	unannotated	0.00939778	0.962894	0.983772	Positive
x00842	N-Acetylhistamine	2b	-0.00909596	0.964085	0.983772	Negative
x01206		unannotated	-0.00895661	0.964635	0.983772	Negative
x00889		unannotated	-0.00826472	0.967365	0.983772	Negative
x00828	Benzoyl cyanide	3	-0.00810824	0.967983	0.983772	Negative
x00358	indoline-2-carboxylic acid	2b	-0.0079809	0.968485	0.983772	Negative
sl00282	Isovalerylcarnitine	2a	0.00738416	0.970841	0.983772	Positive
x01147	Helicin	3	0.00728984	0.971213	0.983772	Positive
sl00184	Betaine	1	-0.00475661	0.981214	0.989169	Negative
x00296	Indole-3-carbidol	3	0.00461039	0.981792	0.989169	Positive
x01387		unannotated	-0.00434104	0.982855	0.989169	Negative
x00689		unannotated	0.00370093	0.985383	0.989594	Positive
x00789	N-4-hydroxyphenylacetylglutamic acid	3	0.00309223	0.987787	0.989893	Positive
x00351	2-Amino-4-methylpyrimidine	2b	-0.000246029	0.999028	0.999028	Negative

## Sheet: sheet_7
feature	compound_name	annotation_level	cor	p	fdr	cor_sign
x01098	(2R)-2,3-Dihydroxypropyl 2-(palmitoylamino)ethyl phosphate	3	-0.562295	0.00226758	0.98437	Negative
x01139		unannotated	-0.511019	0.0064495	0.98437	Negative
sl00127	Kynurenine	2a	-0.474414	0.0124122	0.98437	Negative
x01065		unannotated	0.472036	0.0129209	0.98437	Positive
x01067		unannotated	0.437009	0.0226497	0.98437	Positive
x00372	acetylspermine	3	0.435853	0.0230518	0.98437	Positive
x00996	[Similar to: 5-[(4-Methylbenzyl)thio]-1,3,4-thiadiazol-2-amine; ΔMass: 55.9613 Da]	unannotated	0.426387	0.0265665	0.98437	Positive
sl00090	Carnosine	2a	-0.431676	0.0276624	0.98437	Negative
x00002		unannotated	0.415139	0.0312952	0.98437	Positive
x01357	Kynurenic acid	2a	-0.410893	0.0332471	0.98437	Negative
x00595	1,8-Diazabicyclo [5.4.0]undec-7-ene	2b	0.410165	0.0335912	0.98437	Positive
sl00184	Betaine	1	0.406082	0.0355754	0.98437	Positive
x00431	Levulinic acid	3	0.404375	0.0364322	0.98437	Positive
x00591	3,5-Dihydroxybenzoic acid	2b	-0.404126	0.0365588	0.98437	Negative
x00351	2-Amino-4-methylpyrimidine	2b	-0.403918	0.0366645	0.98437	Negative
x00610		unannotated	0.401847	0.0377317	0.98437	Positive
x01218		unannotated	0.39828	0.0396274	0.98437	Positive
x00555	Dobesilic acid	3	-0.385102	0.0472981	0.98437	Negative
sl00036	Pyroglutamic acid	2a	-0.383685	0.0481883	0.98437	Negative
x00726	[Similar to: 1-(3-{[(4-Hydroxypyrimidin-2-yl)thio]methyl}-4-methoxyphenyl)ethan-1-one; ΔMass: -7.1007 Da]	unannotated	0.376356	0.0530043	0.98437	Positive
x01303	[Similar to: 4-{[2-(4-fluorophenyl)-2-oxoethyl]amino}-4-oxobutanoic acid; ΔMass: -36.9946 Da]	unannotated	0.37342	0.0550362	0.98437	Positive
x00322		unannotated	0.367518	0.0593048	0.98437	Positive
x00756	[Similar to: 4-(3,4-dimethoxyphenyl)-3-methyl-1H-pyrazol-5-amine; ΔMass: -0.0457 Da]	unannotated	-0.361627	0.0638182	0.98437	Negative
x00884		unannotated	0.361122	0.0642174	0.98437	Positive
x00851	carboxynorspermidine	3	0.359394	0.0655973	0.98437	Positive
sl00292	N-Acetyl-glycine	1	0.35667	0.0678191	0.98437	Positive
x00397	2-[(1,5-dimethyl-2-benzimidazolyl)amino]ethanol	3	0.348876	0.0744962	0.98437	Positive
x01156		unannotated	0.347859	0.0754034	0.98437	Positive
x00405	[Similar to: N-(2-hydroxyethyl)-N'-propylthiourea; ΔMass: 41.8899 Da]	unannotated	0.345008	0.0779916	0.98437	Positive
x00673	[Similar to: N-(3,5-dimethyl-4-isoxazolyl)-N'-{[1-(phenylsulfonyl)-4-piperidinyl]methyl}urea; ΔMass: -265.1273 Da]	unannotated	0.342954	0.0798989	0.98437	Positive
x00489	2-Hydroxyquinoline	2b	-0.342556	0.0802718	0.98437	Negative
x01225	[Similar to: L-Ergothioneine; ΔMass: -16.9857 Da]	unannotated	0.340549	0.0821758	0.98437	Positive
x01384		unannotated	0.339979	0.0827231	0.98437	Positive
x00643	(4aS,10aS)-4a,7-Dimethyl-3,4,4a,9,10,10a-hexahydro-2(1H)-phenanthrenone	3	-0.338047	0.0845972	0.98437	Negative
x01054	Fluorodopa	3	-0.336592	0.08603	0.98437	Negative
x01107	[Similar to: 4-{[2-(4-fluorophenyl)-2-oxoethyl]amino}-4-oxobutanoic acid; ΔMass: -23.0869 Da]	unannotated	0.336524	0.0860966	0.98437	Positive
x00877	N,N-Dimethyl-N-phenylurea	3	0.335698	0.0869192	0.98437	Positive
x00240	BAP	3	-0.334337	0.0882857	0.98437	Negative
sl00076	4-Methyl-2-oxovaleric acid	2a	0.331862	0.0908143	0.98437	Positive
x00668		unannotated	0.331017	0.0916896	0.98437	Positive
x00925	Ile-cys	3	0.330368	0.0923663	0.98437	Positive
sl00016	Glutamic acid	1	0.324262	0.0989182	0.98437	Positive
x01349	[Similar to: Benthiavalicarb isopropyl; ΔMass: -50.1678 Da]	unannotated	-0.323654	0.0995894	0.98437	Negative
x00904	Ecgonine	2b	0.322344	0.101046	0.98437	Positive
x00733	Carbaryl	3	-0.322179	0.101232	0.98437	Negative
x00960	5-Hydroxytryptophol	3	0.319524	0.104238	0.98437	Positive
sl00081	Anserine	2a	-0.314987	0.109529	0.98437	Negative
x01342	2-Hydroxy-4-(methylthio)butanoic acid	3	-0.314818	0.109729	0.98437	Negative
x00698		unannotated	0.314164	0.11051	0.98437	Positive
sl00204	Nicotine amide	2a	-0.313913	0.110809	0.98437	Negative
x00355	4-Hydroxyproline	2a	0.310022	0.115544	0.98437	Positive
x01085	4,4'-Bipyridine	2b	0.309688	0.115957	0.98437	Positive
x00505	2-Oxindole	2b	-0.303766	0.123467	0.98437	Negative
x01137	Glyphosate	3	-0.299904	0.128551	0.98437	Negative
sl00038	Succinic acid	2a	0.297242	0.132144	0.98437	Positive
x01175		unannotated	-0.296732	0.13284	0.98437	Negative
x01113		unannotated	-0.296712	0.132869	0.98437	Negative
x01328	4-(Diethylamino)salicylaldehyde	2b	0.296681	0.132911	0.98437	Positive
x01263		unannotated	0.295775	0.134156	0.98437	Positive
x01095	DL-4-Hydroxyphenyllactic acid	2b	-0.295664	0.134308	0.98437	Negative
x01115	Isatin	3	-0.295391	0.134685	0.98437	Negative
sl00125	3-Indoxylsulfuric acid	1	-0.294621	0.135752	0.98437	Negative
x00309	Uridine	2a	0.294514	0.135902	0.98437	Positive
x00889		unannotated	-0.294201	0.136337	0.98437	Negative
x00771	[Similar to: Methyl 2-[2,6-dioxo-4-(3,4,5-trimethoxyphenyl)piperidino]-4,5-dimethoxybenzoate; ΔMass: -205.2150 Da]	unannotated	-0.290854	0.141062	0.98437	Negative
x00828	Benzoyl cyanide	3	-0.290161	0.142056	0.98437	Negative
x01254	PFPeA	3	0.288342	0.144687	0.98437	Positive
x01160		unannotated	0.284995	0.149617	0.98437	Positive
sl00290	N-Acetyl-aspartic acid	2a	0.284962	0.149666	0.98437	Positive
x00677	Docosahexaenoic acid ethyl ester	2b	-0.283852	0.151329	0.98437	Negative
x01018	Glyceric acid	1	0.280294	0.156744	0.98437	Positive
x00778	6-Methylquinoline	2b	0.278947	0.15883	0.98437	Positive
x00965	2-[[2-(3,5-dimethyl-1-pyrazolyl)-6-methyl-4-pyrimidinyl]amino]ethanol	3	-0.272073	0.169783	0.98437	Negative
x00846	4-Methoxyaniline	3	0.271835	0.170173	0.98437	Positive
x00556	Diethyl phthalate	3	-0.264749	0.182026	0.98437	Negative
x00539	3,4,5-trimethoxyhydrocinnamic acid	3	-0.263838	0.183591	0.98437	Negative
sl00165	α-aminobutyric acid	2a	0.262883	0.185242	0.98437	Positive
x01257		unannotated	0.261552	0.187559	0.98437	Positive
x00796		unannotated	-0.261021	0.18849	0.98437	Negative
sl00147	Serine	1	0.259887	0.190487	0.98437	Positive
x00265		unannotated	0.258363	0.193192	0.98437	Positive
x00439		unannotated	0.258307	0.193293	0.98437	Positive
sl00141	Pyruvic acid	2a	0.254709	0.19979	0.98437	Positive
x00594	3-Ureidopropionic acid	2a	-0.253822	0.201414	0.98437	Negative
x01234	N-(4,5-dimethyl-2-thiazolyl)cyclohexanecarboxamide	3	-0.252964	0.202995	0.98437	Negative
x01318	4-vinylphenol sulfate	3	-0.252826	0.203248	0.98437	Negative
sl00156	Tauroursodeoxycholic acid	2a	-0.251939	0.204893	0.98437	Negative
x00657	4-Methyl-N-(4-pyridinylmethyl)benzenesulfonamide	3	-0.246085	0.215966	0.98437	Negative
x00342	5-Nitro-o-toluidine	3	-0.244043	0.219923	0.98437	Negative
sl00057	2/3-Hydroxybutyric acid	2a	0.243472	0.221037	0.98437	Positive
x00072	Urea	2a	-0.243285	0.221404	0.98437	Negative
x00422		unannotated	-0.242434	0.223074	0.98437	Negative
x00348		unannotated	0.241865	0.224196	0.98437	Positive
x00572	p-Cresylsulfate	3	-0.239891	0.228118	0.98437	Negative
x00129		unannotated	0.239223	0.229454	0.98437	Positive
x00389	5alpha-androstane-3alpha-glcosyl-17beta-diol	3	-0.239101	0.2297	0.98437	Negative
x00357	D-Mannoheptulose	3	0.235393	0.237223	0.98437	Positive
x00891	3,3'-Methylenebis([1,2,4]triazolo[4,3-a]pyridine)	3	-0.233081	0.241993	0.98437	Negative
x00127		unannotated	0.232275	0.243673	0.98437	Positive
x00964	3-Hydroxydecanoic acid	2b	-0.230573	0.247243	0.98437	Negative
x01177	2-pentan-3-yl-1H-imidazole	3	0.229178	0.250194	0.98437	Positive
x01379		unannotated	0.227691	0.253364	0.98437	Positive
sl00068	3-Methyl-2-oxovaleric acid	2a	0.227452	0.253876	0.98437	Positive
sl00143	Rhamnose	2a	0.227222	0.254371	0.98437	Positive
x00896	S-methyl D-thioglycerate	3	0.225705	0.257641	0.98437	Positive
sl00298	Octanoylcarnitine	2a	0.224801	0.259603	0.98437	Positive
x01400	delta-guanidinovaleric acid	3	-0.224747	0.25972	0.98437	Negative
x00515		unannotated	0.22058	0.268892	0.98437	Positive
x00962	[Similar to: 1-(4-methoxyphenyl)propane-1,2-diol; ΔMass: -93.0789 Da]	unannotated	-0.220461	0.269155	0.98437	Negative
sl00278	Homocysteine	2a	0.217294	0.276268	0.98437	Positive
x01356	capuride	3	0.21652	0.278025	0.98437	Positive
x00247		unannotated	0.215225	0.280979	0.98437	Positive
x01012		unannotated	0.21394	0.283931	0.98437	Positive
x00283	Urocanic acid	1	-0.212685	0.286833	0.98437	Negative
x01398		unannotated	0.210739	0.29137	0.98437	Positive
x01396	[Similar to: 4-{[2-(4-fluorophenyl)-2-oxoethyl]amino}-4-oxobutanoic acid; ΔMass: 11.9292 Da]	unannotated	0.210632	0.291619	0.98437	Positive
x00053	Proline	1	0.210143	0.292766	0.98437	Positive
x01124	Allantoic acid	3	0.207907	0.29805	0.98437	Positive
x00734	glutaral	3	-0.206602	0.301163	0.98437	Negative
x01010		unannotated	0.206415	0.30161	0.98437	Positive
x01376	3-hydroxy-cis-5-octenoylcarnitine	3	0.205	0.305008	0.98437	Positive
x00581	2-Ammonio-3-(3-oxo-1-propen-1-yl)-2-butenedioate	3	0.203373	0.308947	0.98437	Positive
x00799	5-guanidino-2-oxopentanoic acid	3	0.202456	0.311179	0.98437	Positive
sl00115	Hippuric acid	1	0.202127	0.311983	0.98437	Positive
x00163	Methyl Î²-D-glucuronide	3	-0.201998	0.312299	0.98437	Negative
x00336	Ornithine	1	0.201938	0.312445	0.98437	Positive
x01078	Hydrogen bromide	3	-0.201798	0.312789	0.98437	Negative
x00689		unannotated	-0.20094	0.314894	0.98437	Negative
x00356	4-ethylphenylsulfonic acid	3	-0.200634	0.315645	0.98437	Negative
x00136	N,N,4-Trimethylaniline	2b	0.2005	0.315977	0.98437	Positive
x00593	1-(4-Nitrophenyl)ethanone	3	-0.200297	0.316476	0.98437	Negative
x00179	[Similar to: N-[4,5-dihydroxy-2-({4-[hydroxy(phenyl)methyl]-5-oxo-3-phenyl-2,5-dihydrofuran-2-yl}oxy)-6-(methoxymethyl)oxan-3-yl]acetamide; ΔMass: -382.1044 Da]	unannotated	0.19954	0.318348	0.98437	Positive
x00178	Pulcherriminic acid	3	0.19954	0.318348	0.98437	Positive
sl00108	Glycocholic acid	2a	0.199362	0.318787	0.98437	Positive
x00835	1,2-Cyclohexanediamine	3	0.199114	0.319403	0.98437	Positive
x00533	galegine	3	0.199054	0.319551	0.98437	Positive
x00717		unannotated	-0.198756	0.320292	0.98437	Negative
x01146	1,2,3,4,6,7,8-Heptachlorodibenzofuran	3	0.19874	0.32033	0.98437	Positive
x01281	N-(2-oxolanylmethyl)-1-phenyl-4-pyrazolo[3,4-d]pyrimidinamine	3	-0.197687	0.322955	0.98437	Negative
x01335		unannotated	-0.197338	0.323828	0.98437	Negative
x01243	[Similar to: 1-(3,4-dimethoxyphenyl)ethan-1-one oxime; ΔMass: -102.0556 Da]	unannotated	0.197074	0.324487	0.98437	Positive
x00638	triazacyclononane	3	0.196785	0.325211	0.98437	Positive
x00744		unannotated	0.196757	0.325282	0.98437	Positive
sl00301	Prostaglandin E2	2a	-0.195485	0.328482	0.98437	Negative
x00098	Xanthurenate	3	0.195343	0.32884	0.98437	Positive
sl00215	Thiamine	1	0.195061	0.329552	0.98437	Positive
x01275		unannotated	-0.194931	0.329883	0.98437	Negative
sl00166	a/b/ω-Muricholic acid	2a	-0.198479	0.331055	0.98437	Negative
x00619	[Similar to: N-{[(2R,4S,5R)-5-Ethyl-1-azabicyclo[2.2.2]oct-2-yl]methyl}-2-furamide; ΔMass: -96.0211 Da]	unannotated	0.194032	0.332162	0.98437	Positive
x00608	D-(−)-Erythrose	3	0.193934	0.332409	0.98437	Positive
x00285	(2S,6S)-2-Ammonio-6-[(3-carboxylatopropanoyl)amino]heptanedioate	3	0.193932	0.332414	0.98437	Positive
x01343	1-O-Arsonopentofuranose	3	0.192952	0.334912	0.98437	Positive
x00413	4-(2-Methoxyphenoxy)-N-(3-pyridinyl)benzenesulfonamide	3	0.192733	0.335471	0.98437	Positive
sl00189	Creatine	1	-0.191948	0.337482	0.98437	Negative
x01045	[Similar to: (3beta,5xi,9xi)-3-[(6-Deoxy-beta-D-glucopyranosyl)oxy]urs-12-ene-27,28-dioic acid; ΔMass: -277.1566 Da]	unannotated	-0.191866	0.33769	0.98437	Negative
sl00225	1-Phenylethyl acetate	2a	0.190399	0.341468	0.98437	Positive
x01369		unannotated	0.189111	0.344804	0.98437	Positive
sl00003	2-Oxoglutaric acid	2a	0.187444	0.349154	0.98437	Positive
x00641		unannotated	0.186594	0.351383	0.98437	Positive
x00228	[Similar to: 3-[4,8,11-tri(2-cyanoethyl)-1,4,8,11-tetraazacyclotetradecanyl]propanenitrile; ΔMass: -259.1797 Da]	unannotated	0.184971	0.355661	0.98437	Positive
x00104	DL-Stachydrine	2b	0.183435	0.359741	0.98437	Positive
sl00128	Lactic acid	1	0.182707	0.361684	0.98437	Positive
x01194		unannotated	-0.18262	0.361916	0.98437	Negative
x00649	(2S)-5-(Carbamoylamino)-2-[(3-carboxylatopropanoyl)amino]pentanoate	3	0.182379	0.362562	0.98437	Positive
x00073		unannotated	0.182353	0.362631	0.98437	Positive
sl00194	Glycine	2a	-0.181031	0.366181	0.98437	Negative
x00807	[Similar to: N-Cyclopropyl-2-[(2S,3R,4S,5R)-5-({[(3,5-dimethoxyphenyl)carbamoyl]amino}methyl)-3,4-dihydroxytetrahydro-2-furanyl]acetamide; ΔMass: -257.1341 Da]	unannotated	-0.179822	0.369444	0.98437	Negative
x01013		unannotated	0.179809	0.36948	0.98437	Positive
x00568	1-Oxo-1,2,4-butanetricarboxylic acid	3	0.17866	0.372597	0.98437	Positive
x00821	cis-4-Decenoyl carnitine	3	0.177846	0.374815	0.98437	Positive
sl00122	Indole-3-carboxylate	2a	0.176085	0.379639	0.98437	Positive
x00172	[Similar to: Acetyl-L-carnitine; ΔMass: 28.0345 Da]	unannotated	0.176054	0.379724	0.98437	Positive
x00141		unannotated	0.174283	0.384612	0.98437	Positive
x00818	[Similar to: N-(3-methylphenyl)-2-(3-pyridinyl)-1-pyrrolidinecarboxamide; ΔMass: -174.0943 Da]	unannotated	0.174202	0.384836	0.98437	Positive
x00670	4-heptyl-3-methyl-1H-pyrazol-5-ol	2b	0.173983	0.385443	0.98437	Positive
x01226		unannotated	0.171426	0.392573	0.98437	Positive
sl00256	Creatinine	2a	0.171268	0.393016	0.98437	Positive
x00862	1-Vinylimidazole	2b	-0.171215	0.393163	0.98437	Negative
x01191		unannotated	0.169483	0.398039	0.98437	Positive
x00243	4-Hydroxy-5-methylfuran-3(2H)-one	3	0.167673	0.403172	0.98437	Positive
sl00229	2-Methylbutyrylglycine	2a	0.166855	0.405504	0.98437	Positive
x00388		unannotated	0.166778	0.405724	0.98437	Positive
x01292	2-Hydroxyisocaproic acid	2a	-0.165663	0.408915	0.98437	Negative
x01237	2-Oxoglutarate dianion	3	-0.165432	0.409578	0.98437	Negative
x01202		unannotated	0.165269	0.410044	0.98437	Positive
x00060	D-Xylonic acid	3	0.164956	0.410944	0.98437	Positive
x00464	Furfural	3	-0.164736	0.411577	0.98437	Negative
x00385	Allantoin	1	-0.163905	0.413972	0.98437	Negative
x01227	Dipropyl sulfite	3	-0.163614	0.414814	0.98437	Negative
x00574	N-Acetylvaline	3	-0.163348	0.415584	0.98437	Negative
x00349		unannotated	0.162885	0.416924	0.98437	Positive
x00229	Pyrrolidine	3	-0.161995	0.419509	0.98437	Negative
sl00134	N-Acetyl-phenylalanine	2a	-0.161944	0.419659	0.98437	Negative
x00472	[Similar to: 6-[4-(3,4-dimethoxyphenyl)-hexahydrofuro[3,4-c]furan-1-yl]-4-methoxy-2H-1,3-benzodioxole; ΔMass: -136.3069 Da]	unannotated	0.161939	0.419673	0.98437	Positive
sl00169	N-Acetyl-ornithine	2a	0.161478	0.421015	0.98437	Positive
x00423	[Similar to: 5-hydroxy-6,8-dimethoxy-7-{[(2S,3R,4S,5S,6R)-3,4,5-trihydroxy-6-(hydroxymethyl)oxan-2-yl]oxy}-2H-chromen-2-one; ΔMass: -217.0134 Da]	unannotated	0.161121	0.422055	0.98437	Positive
x00105		unannotated	0.160422	0.424098	0.98437	Positive
sl00030	Pantothenic acid	1	-0.160416	0.424117	0.98437	Negative
x01267		unannotated	-0.160137	0.424934	0.98437	Negative
x00672	Hexanoylcarnitine	2b	0.159191	0.427709	0.98437	Positive
x01179	2-Phenylcyclopropanamine	3	0.158476	0.429815	0.98437	Positive
x01102	[Similar to: N-(2-hydroxyethyl)-N'-propylthiourea; ΔMass: -0.1400 Da]	unannotated	-0.158064	0.43103	0.98437	Negative
x00379	Biacetyl	3	-0.157876	0.431587	0.98437	Negative
x00063		unannotated	0.157508	0.432673	0.98437	Positive
x00963		unannotated	0.15702	0.434119	0.98437	Positive
x00757		unannotated	0.156247	0.436415	0.98437	Positive
x00684	Nitrosoheptamethyleneimine	2b	-0.155611	0.438305	0.98437	Negative
sl00272	Guanidoacetic acid	2a	0.155176	0.439603	0.98437	Positive
x00209		unannotated	0.154646	0.441188	0.98437	Positive
x00041	2,4-Xylidine	2b	0.153624	0.444249	0.98437	Positive
x01171	5-Methoxy-1H-indol-6-yl Î²-D-glucopyranosiduronic acid	3	0.152979	0.446185	0.98437	Positive
x00208	Methionine sulfoxide	2a	-0.152439	0.447812	0.98437	Negative
x00829	2-Pyrrolidone	3	0.151839	0.449621	0.98437	Positive
x01317	Ethyl acetate	3	-0.151373	0.45103	0.98437	Negative
x00219	Deanol	3	-0.150425	0.453903	0.98437	Negative
x00888	[Similar to: ethyl 2-[({[3-(2,6-dichlorophenyl)-5-methylisoxazol-4-yl]amino}carbonyl)amino]-4-methylthiophene-3-carboxylate; ΔMass: -296.0119 Da]	unannotated	-0.150094	0.454909	0.98437	Negative
sl00151	Tauro-a/b-Muricholic acid	2a	-0.148445	0.459935	0.98437	Negative
x00486	4-Phenolsulfonic acid	2b	0.146308	0.466494	0.98437	Positive
x01360	Coumachlor	3	0.144992	0.470553	0.98437	Positive
x01120		unannotated	0.143946	0.473796	0.98437	Positive
x01288	[Similar to: 1,3-dimethyl-5-(morpholinosulfonyl)indolin-2-one; ΔMass: -67.0786 Da]	unannotated	0.143548	0.475032	0.98437	Positive
x00366		unannotated	0.143111	0.476393	0.98437	Positive
x00837	[Similar to: 2-(5-chloro-3-methyl-1-benzothiophen-2-yl)acetohydrazide; ΔMass: 7.9583 Da]	unannotated	0.142027	0.479774	0.98437	Positive
x00277		unannotated	0.1418	0.480483	0.98437	Positive
x00076	[Similar to: N-allyl-2-(2-methyl-1-benzofuran-3-yl)acetamide; ΔMass: -51.9738 Da]	unannotated	0.140631	0.484145	0.98437	Positive
x01056	[Similar to: 3-hydroxy-2-(3-nitro-4-piperidinobenzyl)propanenitrile; ΔMass: -130.0547 Da]	unannotated	0.139634	0.487279	0.98437	Positive
x01273	Menadione bisulfite	3	-0.139607	0.487365	0.98437	Negative
x01258		unannotated	0.139178	0.488718	0.98437	Positive
x00792	[Similar to: Chlorhexidine; ΔMass: -380.1031 Da]	unannotated	0.138992	0.489302	0.98437	Positive
x01419		unannotated	-0.138835	0.4898	0.98437	Negative
sl00248	7-Methylguanine	1	-0.138193	0.491829	0.98437	Negative
sl00223	Indole-3-carboxyaldehyde	1	0.137644	0.493568	0.98437	Positive
x01188		unannotated	0.136727	0.49648	0.98437	Positive
x00456	ARECOLINE	3	0.136195	0.498171	0.98437	Positive
x01059	2-(5-Amino-4-cyano-1H-imidazol-1-yl)-5-(4-methyl-1-piperazinyl)benzoic acid	3	0.135667	0.499854	0.98437	Positive
x00748		unannotated	-0.135336	0.50091	0.98437	Negative
sl00091	Cholic acid	1	-0.135079	0.501733	0.98437	Negative
x00328	2,2,6,6-Tetramethyl-4-piperidinol	2b	0.134377	0.503978	0.98437	Positive
x00421	[Similar to: N'3-(3,5-dibromo-4-hydroxybenzylidene)-5-methylisoxazole-3-carbohydrazide; ΔMass: -253.9044 Da]	unannotated	-0.133305	0.507416	0.98437	Negative
x01390	Idebenone	3	0.132364	0.510445	0.98437	Positive
x00981		unannotated	0.131155	0.51435	0.98437	Positive
x00078	Histidine	1	-0.129104	0.521007	0.98437	Negative
x00699		unannotated	0.128377	0.523376	0.98437	Positive
x01122	2-Acetylphenanthrene	3	0.128307	0.523605	0.98437	Positive
x00426	[Similar to: ethyl 4-oxo-7-(trifluoromethyl)-4H-pyrido[1,2-a]pyrimidine-3-carboxylate; ΔMass: -96.0235 Da]	unannotated	-0.127757	0.525399	0.98437	Negative
x01189	[Similar to: 2,3-dimethoxy-5-(6,7,8-trimethoxy-3,4-dihydro-2H-1-benzopyran-3-yl)cyclohexa-2,5-diene-1,4-dione; ΔMass: -258.1514 Da]	unannotated	0.12772	0.525521	0.98437	Positive
sl00118	Homocitrulline	2a	0.126845	0.528385	0.98437	Positive
x01340		unannotated	-0.124361	0.536556	0.98437	Negative
sl00067	Indole-3-acrylic acid	2a	-0.124019	0.537687	0.98437	Negative
x01197	3-hydroxy-cis-5-octenoylcarnitine	3	0.121945	0.544563	0.98437	Positive
x00801	[Similar to: 1-[(2-chlorophenyl)sulfonyl]-3-methyl-4-(2-methylallyl)-4,5-dihydro-1H-pyrazol-5-one; ΔMass: 34.1480 Da]	unannotated	0.121725	0.545294	0.98437	Positive
x01377		unannotated	-0.121265	0.546825	0.98437	Negative
x00331		unannotated	-0.119897	0.551388	0.98437	Negative
x00358	indoline-2-carboxylic acid	2b	-0.118996	0.554405	0.98437	Negative
x00765		unannotated	-0.118009	0.557719	0.98437	Negative
x00261	gaboxadol	3	0.117823	0.558344	0.98437	Positive
sl00176	4-Guanidinobutyric acid	1	0.116995	0.561132	0.98437	Positive
x00027	N,N′-diisopropylcarbodiimide	3	0.115886	0.564877	0.98437	Positive
x01251		unannotated	-0.11567	0.565607	0.98437	Negative
sl00299	2-Hydroxyphenylacetic acid/ Vanillin	2a	-0.11537	0.566623	0.98437	Negative
x00780		unannotated	0.11521	0.567166	0.98437	Positive
x00831	[Similar to: N-[2-(1,5-dimethyl-4-nitro-1H-pyrazol-3-yl)vinyl]-N,N-dimethylamine; ΔMass: -42.9694 Da]	unannotated	0.114902	0.568207	0.98437	Positive
x00493	(8S,9S)-6-[(2R)-1-hydroxypropan-2-yl]-8-methyl-9-[[methyl(pyridin-4-ylmethyl)amino]methyl]-10-oxa-1,6,14,15-tetrazabicyclo[10.3.0]pentadeca-12,14-dien-5-one	3	-0.114693	0.568918	0.98437	Negative
x01374	[Similar to: (1R,9R)-5-Cyclohexyl-11-(propylsulfonyl)-7,11-diazatricyclo[7.3.1.02,7]trideca-2,4-dien-6-one; ΔMass: -172.1016 Da]	unannotated	0.114378	0.569986	0.98437	Positive
sl00083	Pentose	2a	-0.114015	0.571217	0.98437	Negative
x01367		unannotated	-0.112795	0.575371	0.98437	Negative
x00666		unannotated	-0.1126	0.576037	0.98437	Negative
sl00131	N-Acetyl-alanine	2a	-0.112143	0.577595	0.98437	Negative
x00147		unannotated	-0.111949	0.578257	0.98437	Negative
x01337		unannotated	-0.111614	0.579404	0.98437	Negative
x01196		unannotated	-0.111325	0.580392	0.98437	Negative
x01198	Glutaric acid	2a	-0.11053	0.583114	0.98437	Negative
sl00062	3-(3-Hydroxyphenyl)propionic acid	1	-0.109474	0.58674	0.98437	Negative
sl00297	N-Acetyl-glutamine	2a	0.10931	0.587306	0.98437	Positive
x01058		unannotated	-0.109019	0.588306	0.98437	Negative
x00302		unannotated	-0.108475	0.590181	0.98437	Negative
sl00224	1-Methyl Adenosine	1	-0.108415	0.590386	0.98437	Negative
x00296	Indole-3-carbidol	3	0.108153	0.59129	0.98437	Positive
x00651	[Similar to: N-tetrahydrothiophen-3-yl-N'-(2,3,4-trichlorophenyl)urea; ΔMass: 27.9246 Da]	unannotated	0.107816	0.592454	0.98437	Positive
x01180	[Similar to: 1-chloro-2-[({[(1-cyclopropylethylidene)amino]oxy}carbonyl)amino]benzene; ΔMass: -108.0420 Da]	unannotated	-0.107686	0.592904	0.98437	Negative
x00631	[Similar to: 14,15-Leukotriene E4; ΔMass: -279.3311 Da]	unannotated	0.107243	0.594435	0.98437	Positive
x01407	2-(5-Amino-4-cyano-1H-imidazol-1-yl)-5-(4-methyl-1-piperazinyl)benzoic acid	3	0.105495	0.600492	0.98437	Positive
x00894	[Similar to: Perazine; ΔMass: -199.0456 Da]	unannotated	0.104903	0.602547	0.98437	Positive
x00685		unannotated	0.104454	0.60411	0.98437	Positive
sl00044	Tyrosine	1	-0.102922	0.609456	0.98437	Negative
x00404		unannotated	0.10232	0.611561	0.98437	Positive
x00968	[Similar to: Microcystin LF; ΔMass: -455.2136 Da]	unannotated	0.102036	0.612553	0.98437	Positive
x00627	[Similar to: N-tetrahydrothiophen-3-yl-N'-(2,3,4-trichlorophenyl)urea; ΔMass: 5.9426 Da]	unannotated	0.101816	0.613323	0.98437	Positive
x00961	indoline-2-carboxylic acid	2b	0.100914	0.616487	0.98437	Positive
x00130	[Similar to: 4-{[2-(4-fluorophenyl)-2-oxoethyl]amino}-4-oxobutanoic acid; ΔMass: -117.1731 Da]	unannotated	0.100429	0.618192	0.98437	Positive
x00504	3-(propan-2-yl)-octahydropyrrolo[1,2-a]pyrazine-1,4-dione	2b	0.0995822	0.621171	0.98437	Positive
x01154	Acetanilide	3	-0.09917	0.622624	0.98437	Negative
x01333	5-Chlorooctyl acetate	3	0.0977056	0.627795	0.98437	Positive
x00024		unannotated	-0.0976502	0.627991	0.98437	Negative
x00291		unannotated	0.0975229	0.628442	0.98437	Positive
x01184	Methyl Yellow	3	0.0971685	0.629696	0.98437	Positive
x01361	p-Cresol	3	0.099182	0.62977	0.98437	Positive
x01352	[Similar to: 4-{[2-(4-fluorophenyl)-2-oxoethyl]amino}-4-oxobutanoic acid; ΔMass: 25.9084 Da]	unannotated	0.0966005	0.631709	0.98437	Positive
x01016	Ethyl L-methioninate	3	-0.0931326	0.644054	0.98437	Negative
x00097	Serotonin	1	0.0912527	0.650784	0.98437	Positive
x01176	1-Phenyl-1H-pyrazolo[3,4-d]pyrimidin-4-amine	3	0.0907662	0.652531	0.98437	Positive
x00768	Edaravone	3	0.0902473	0.654395	0.98437	Positive
x01030		unannotated	-0.0899165	0.655585	0.98437	Negative
x01387		unannotated	-0.0894838	0.657142	0.98437	Negative
x01235	3-(1-hydroxyethyl)-2,3,6,7,8,8a-hexahydropyrrolo[1,2-a]pyrazine-1,4-dione	2b	-0.0890067	0.658861	0.98437	Negative
x00624	Thiomorpholine	3	-0.0885495	0.66051	0.98437	Negative
x01287	2-Acetylphenanthrene	3	0.0869611	0.66625	0.98437	Positive
x01417		unannotated	-0.0866612	0.667336	0.98437	Negative
sl00085	Arginine	1	0.0860964	0.669383	0.98437	Positive
x01212	[Similar to: 1-(4-methoxyphenyl)propane-1,2-diol; ΔMass: -52.0524 Da]	unannotated	-0.0860369	0.669598	0.98437	Negative
x00074		unannotated	0.0849079	0.673697	0.98437	Positive
x00224	Butylated hydroxytoluene	3	0.0847708	0.674195	0.98437	Positive
sl00232	2-Picolinic acid	2a	-0.084765	0.674216	0.98437	Negative
x01173	N(4)-phosphoagmatine	3	0.0843251	0.675816	0.98437	Positive
sl00039	Taurine	1	-0.0841196	0.676564	0.98437	Negative
x00992	N-(3-acetamidopropyl)pyrrolidin-2-one	3	-0.0831275	0.680179	0.98437	Negative
x00171		unannotated	-0.0831076	0.680251	0.98437	Negative
x00742	9-methylhypoxanthine	3	-0.0830192	0.680574	0.98437	Negative
sl00011	cis-Aconitic acid	2a	-0.0827415	0.681587	0.98437	Negative
x01042		unannotated	0.0804299	0.690042	0.98437	Positive
x01052	2-[3-carboxylato-3-(methylammonio)propyl]-L-histidine dizwitterion	3	0.0801571	0.691043	0.98437	Positive
x00789	N-4-hydroxyphenylacetylglutamic acid	3	0.079626	0.692991	0.98437	Positive
x00727	(2E)-octenoylcarnitine	3	-0.0791517	0.694734	0.98437	Negative
x00521	[Similar to: 6-[4-(3,4-dimethoxyphenyl)-hexahydrofuro[3,4-c]furan-1-yl]-4-methoxy-2H-1,3-benzodioxole; ΔMass: -140.1482 Da]	unannotated	-0.0791456	0.694756	0.98437	Negative
sl00190	Cytidine	1	0.0786482	0.696584	0.98437	Positive
x00365	2-Nitro-9H-fluorene	3	-0.0778142	0.699654	0.98437	Negative
sl00018	Glutamine	2a	-0.0774136	0.70113	0.98437	Negative
x00455	[Similar to: (2R,3S,4S,5R,6R)-2-({[(2R,3R,4R,5S)-3,4-dihydroxy-5-(hydroxymethyl)oxolan-2-yl]oxy}methyl)-6-{[(2E)-3,7-dimethylocta-2,6-dien-1-yl]oxy}oxane-3,4,5-triol; ΔMass: -258.1615 Da]	unannotated	0.0772729	0.701648	0.98437	Positive
x01248	(2S)-2-amino-N'-[(4-methyl-2,6-dioxo-5-pyrimidinylidene)methyl]-3-phenylpropanehydrazide	3	0.0765485	0.704321	0.98437	Positive
x01252		unannotated	0.0754117	0.708522	0.98437	Positive
x01141	1-(2,1,3-benzoxadiazol-4-yloxy)-3,3-dimethyl-1-(1,2,4-triazol-1-yl)-2-butanone	3	-0.0748034	0.710773	0.98437	Negative
x01413		unannotated	0.074574	0.711623	0.98437	Positive
sl00308	Sugar alcohol (C6)	2a	0.074498	0.711904	0.98437	Positive
x00035	[Similar to: 1,10-Diamino-4,7-dioxadecane; ΔMass: -13.0316 Da]	unannotated	0.0741797	0.713084	0.98437	Positive
x00014	(2E)-3-[3-(Trifluoromethyl)phenyl]acrylic acid	3	0.0729496	0.717649	0.98437	Positive
x01041		unannotated	-0.0719455	0.721382	0.98437	Negative
sl00153	Taurochenodeoxycholic acid	2a	-0.0711712	0.724264	0.98437	Negative
x00114	[Similar to: 2-(3,4-dihydroisoquinolin-1-yl)-N-propylhydrazine-1-carboxamide; ΔMass: -58.0989 Da]	unannotated	-0.0711244	0.724439	0.98437	Negative
x00773		unannotated	0.0686826	0.733555	0.98437	Positive
sl00247	5-Methylcytosine	2a	0.0686452	0.733695	0.98437	Positive
sl00286	Melatonin	2a	0.06841	0.734575	0.98437	Positive
x01414	HOxAsH-bis(1,2-ethanedithiol)	3	-0.0683232	0.7349	0.98437	Negative
sl00202	Methionine	1	-0.0672048	0.739089	0.98437	Negative
sl00267	Galactosamine/Glucosamine	2a	-0.0670206	0.73978	0.98437	Negative
x01064	6-Methylquinoline	2b	-0.0666853	0.741038	0.98437	Negative
sl00219	Valine	1	0.0662043	0.742844	0.98437	Positive
x00703		unannotated	0.0651094	0.746959	0.98437	Positive
sl00008	Asparagine	2a	-0.0647651	0.748254	0.98437	Negative
x00173	[Similar to: N-(2-hydroxyethyl)-N'-propylthiourea; ΔMass: -3.1746 Da]	unannotated	0.0635692	0.752759	0.98437	Positive
x00710		unannotated	-0.0627105	0.755998	0.98437	Negative
x00803	Toxopyrimidine	3	-0.061547	0.760393	0.98437	Negative
x00582		unannotated	0.0615372	0.760431	0.98437	Positive
x01206		unannotated	0.0606664	0.763725	0.98437	Positive
sl00289	N8-Acetylspermidine	2a	-0.0606037	0.763963	0.98437	Negative
sl00282	Isovalerylcarnitine	2a	0.0603176	0.765046	0.98437	Positive
x00373	4-(2-Hydroxyethyl)phenyl hydrogen sulfate	3	0.0597624	0.76715	0.98437	Positive
x00266	3-Methylhistidine	1	0.0595417	0.767987	0.98437	Positive
x01351		unannotated	-0.0588471	0.770621	0.98437	Negative
x00945	[Similar to: 2-({2-[(1,3-Dimethyl-1H-pyrazol-5-yl)amino]-2-oxoethyl}sulfanyl)acetic acid; ΔMass: -148.0069 Da]	unannotated	-0.0585687	0.771678	0.98437	Negative
x00510	10-HDA	2b	-0.0581091	0.773424	0.98437	Negative
sl00041	Threonine	1	0.0580593	0.773613	0.98437	Positive
x00912	[Similar to: DL-Carnitine; ΔMass: 117.0790 Da]	unannotated	0.0577382	0.774833	0.98437	Positive
sl00015	Galactonic/Gluconic acid	2a	0.0576772	0.775065	0.98437	Positive
x01075	Benserazide	3	-0.0571616	0.777026	0.98437	Negative
x00407		unannotated	0.057092	0.77729	0.98437	Positive
x00527		unannotated	-0.0570604	0.777411	0.98437	Negative
x00215		unannotated	0.0563653	0.780056	0.98437	Positive
x00274	Mefenamic acid	3	-0.0560723	0.781172	0.98437	Negative
x00843	Cyclophosphamide	3	0.0554447	0.783564	0.98437	Positive
x00538		unannotated	-0.0536672	0.790348	0.98437	Negative
x00919	methyl 2,5-dimethyl-1H-pyrrole-3-carboxylate	2b	0.0536515	0.790408	0.98437	Positive
sl00227	2-Aminoadipic acid	2a	-0.053504	0.790971	0.98437	Negative
x00315		unannotated	0.0522513	0.795762	0.98437	Positive
x01255		unannotated	-0.0513514	0.799209	0.98437	Negative
x00713		unannotated	-0.0509506	0.800745	0.98437	Negative
x00548	3-Hydroxy-3-[(3-methylbutanoyl)oxy]-4-(trimethylammonio)butanoate	3	0.0506671	0.801832	0.98437	Positive
x01262	2-Oxindole	2b	-0.0505128	0.802424	0.98437	Negative
sl00064	3-Hydroxy-2-methyl-4-pyrone	2a	0.0503499	0.803048	0.98437	Positive
x01353		unannotated	-0.0493252	0.806981	0.98437	Negative
x00783		unannotated	0.0490047	0.808213	0.98437	Positive
x00087	5',6'-Diamino-1,3'-bis(2-deoxy-beta-D-erythro-pentofuranosyl)-4',5'-dihydro-4,4'-bipyrimidine-2,2'(1H,3'H)-dione	3	-0.0487345	0.809251	0.98437	Negative
x00079	[Similar to: N-(2,5-diethoxy-4-morpholinophenyl)acetamide; ΔMass: -140.1225 Da]	unannotated	-0.0486294	0.809655	0.98437	Negative
x01125	N'-[(3-nitro-6-oxo-1-cyclohexa-2,4-dienylidene)methyl]-1H-indole-3-carbohydrazide	3	-0.0472702	0.814883	0.98437	Negative
x00924	convicine	3	0.0469022	0.8163	0.98437	Positive
x00806	2-(1-Naphthyl)-2-oxoethyl thiocyanate	3	-0.046071	0.819502	0.98437	Negative
x00907		unannotated	0.044871	0.824131	0.98437	Positive
x00810	N-Benzylformamide	2b	0.0443281	0.826226	0.98437	Positive
x00630	Ethyl lactate	3	-0.0440244	0.827399	0.98437	Negative
x00674	(4S,5R)-4,5-Dihydroxy-3-oxo-1-cyclohexene-1-carboxylate	3	-0.0423887	0.833722	0.98437	Negative
sl00294	N-Acetyl-tryptophan	2a	-0.0420672	0.834966	0.98437	Negative
x00119	2-Oxobutyric acid	3	0.0419398	0.835459	0.98437	Positive
x00842	N-Acetylhistamine	2b	-0.0415343	0.837029	0.98437	Negative
x00338	Benserazide	3	-0.0406763	0.840353	0.98437	Negative
sl00095	Daidzein	2a	-0.0406004	0.840647	0.98437	Negative
x00937		unannotated	-0.0405301	0.840919	0.98437	Negative
x00378		unannotated	0.0400123	0.842927	0.98437	Positive
x00739	[Similar to: N1-bicyclo[2.2.1]hept-5-en-2-yl-2-(5-fluoro-2-oxo-2,3-dihydro-1H-indol-3-yliden)hydrazine-1-carbothioamide; ΔMass: -98.2024 Da]	unannotated	0.0391316	0.846343	0.98437	Positive
x01145	[Similar to: Evonine; ΔMass: -542.1590 Da]	unannotated	0.0388457	0.847453	0.98437	Positive
x00976		unannotated	-0.0392935	0.848857	0.98437	Negative
sl00207	Phenylalanine	1	-0.0354175	0.86078	0.98437	Negative
x01274		unannotated	0.0353907	0.860884	0.98437	Positive
x00697	N-((4-AMINO-2-METHYL-5-PYRIMIDINYL)METHYL)FORMAMIDE	3	-0.0353202	0.861159	0.98437	Negative
sl00054	2′-Deoxycytidine	1	-0.035211	0.861584	0.98437	Negative
x01086		unannotated	-0.0351531	0.86181	0.98437	Negative
x01363	[Similar to: N,N-Diethyl-3-[(2S,5aS,8aR)-1-methyl-5-oxodecahydropyrrolo[3,2-E][1,4]diazepin-2-yl]propanamide; ΔMass: -142.1469 Da]	unannotated	0.0351279	0.861908	0.98437	Positive
x00774		unannotated	-0.0346862	0.863628	0.98437	Negative
sl00199	Leucine	1	-0.0339956	0.866319	0.98437	Negative
x01232		unannotated	0.0337348	0.867336	0.98437	Positive
x00143	[Similar to: Acetyl-L-carnitine; ΔMass: 14.0202 Da]	unannotated	0.0331975	0.869431	0.98437	Positive
sl00045	Uric acid	1	-0.0331001	0.86981	0.98437	Negative
x00254		unannotated	0.0324117	0.872496	0.98437	Positive
sl00135	N-acetyl-methionine	2a	0.0322978	0.87294	0.98437	Positive
x00646	7-Chloroemodin	3	0.0319515	0.874292	0.98437	Positive
x00536		unannotated	-0.0320188	0.876605	0.98437	Negative
x00762		unannotated	-0.0307988	0.878794	0.98437	Negative
x00908	[Similar to: N1-[4-(tert-Butyl)phenyl]-2-[(1-methyl-1H-imidazol-2-yl)thio]acetamide; ΔMass: -123.0644 Da]	unannotated	-0.0301078	0.881494	0.98437	Negative
sl00043	Tryptophan	1	-0.0298869	0.882358	0.98437	Negative
x01002		unannotated	0.029414	0.884207	0.98437	Positive
x01044		unannotated	-0.0277569	0.890691	0.98437	Negative
x00495	Histamine	2b	-0.0275409	0.891536	0.98437	Negative
x00675		unannotated	0.027339	0.892327	0.98437	Positive
x00004	Carnitine	1	-0.0270549	0.893439	0.98437	Negative
x00408		unannotated	-0.0263667	0.896135	0.98437	Negative
sl00197	Isoleucine	1	0.0262347	0.896653	0.98437	Positive
x00634	[Similar to: N1-bicyclo[2.2.1]hept-5-en-2-yl-2-(5-fluoro-2-oxo-2,3-dihydro-1H-indol-3-yliden)hydrazine-1-carbothioamide; ΔMass: -120.1842 Da]	unannotated	0.025453	0.899716	0.98437	Positive
x00588	lys-gln	3	-0.024656	0.902842	0.98437	Negative
x00979	[Similar to: N-[2-(1,5-dimethyl-4-nitro-1H-pyrazol-3-yl)vinyl]-N,N-dimethylamine; ΔMass: 0.9862 Da]	unannotated	-0.0234137	0.907716	0.98437	Negative
x00307	g-Butyrobetaine	3	-0.0229516	0.90953	0.98437	Negative
x01210		unannotated	0.0227372	0.910372	0.98437	Positive
x00863	1-octadecanoyl-2-(7Z,10Z,13Z,16Z-docosatetraenoyl)-sn-glycero-3-phosphocholine	3	-0.0230951	0.910835	0.98437	Negative
x00784	Pinolenic acid	2b	-0.0226009	0.910907	0.98437	Negative
sl00001	2-(hydroxymethyl)butanoic/2-Ethylhydracrylic acid	2a	0.0214095	0.915586	0.98437	Positive
sl00211	Pyridoxal	1	-0.021084	0.916866	0.98437	Negative
sl00129	Leucyl-alanine	2a	-0.0205284	0.919049	0.98437	Negative
x00461		unannotated	0.0198624	0.921667	0.98437	Positive
x00440	Dihydroxyindole	3	-0.0197311	0.922183	0.98437	Negative
x00162	Dimethyl fumarate	3	0.0195169	0.923026	0.98437	Positive
sl00236	Indole-3-acetic acid	1	-0.0193654	0.923621	0.98437	Negative
x00524	[Similar to: GPH; ΔMass: -198.1141 Da]	unannotated	-0.018967	0.925189	0.98437	Negative
x00720		unannotated	-0.0187464	0.926056	0.98437	Negative
x00138	Indoline	3	-0.0187407	0.926079	0.98437	Negative
sl00310	Testosterone	2a	-0.0186895	0.92628	0.98437	Negative
x00406		unannotated	0.0182979	0.927821	0.98437	Positive
sl00138	N-Acetyl-tyrosine	2a	0.0176398	0.93041	0.984894	Positive
x00525		unannotated	0.0160298	0.936749	0.989375	Positive
x01411		unannotated	-0.0153819	0.939301	0.989846	Negative
x00256	Malondialdehyde	3	0.0140335	0.944613	0.993218	Positive
sl00187	Choline	1	-0.0130049	0.948667	0.993832	Negative
x00653	HIL	3	-0.0120441	0.952455	0.993832	Negative
sl00266	Hexose	2a	-0.011965	0.952767	0.993832	Negative
x00142	2-Methoxy-5-methylaniline	2b	-0.0117397	0.953656	0.993832	Negative
x01372	2,2'-({2-[(Carboxylatomethyl)amino]ethyl}ammonio)diacetate	3	-0.00933624	0.963137	0.997261	Negative
x01418	validamine 7-phosphate	3	0.00896767	0.964591	0.997261	Positive
x00036	[Similar to: Udenafil; ΔMass: -314.2066 Da]	unannotated	-0.00822138	0.967536	0.997261	Negative
sl00012	Citrulline	1	0.00607286	0.976017	0.997261	Positive
x01395		unannotated	0.00605612	0.976083	0.997261	Positive
sl00181	Alanine	2a	-0.00593915	0.976545	0.997261	Negative
x00485	7-ketodeoxycholic acid	3	-0.00565785	0.977656	0.997261	Negative
x00616	validamine 7-phosphate	3	-0.00478799	0.98109	0.997261	Negative
x00830	[Similar to: R-Palmitoyl-(1-methyl) Ethanolamide; ΔMass: -96.1256 Da]	unannotated	0.00463579	0.981691	0.997261	Positive
x01051	6-Methylindole	2b	-0.00414536	0.983628	0.997261	Negative
x00935		unannotated	0.00260484	0.989712	0.997261	Positive
x01147	Helicin	3	0.00227986	0.990995	0.997261	Positive
x00330		unannotated	0.0019553	0.992277	0.997261	Positive
x00353	L-Ascorbic acid 2-sulfate	2b	-0.00164361	0.993508	0.997261	Negative
sl00157	Thymidine	2a	0.00159018	0.993719	0.997261	Positive
x01024	[Similar to: 2-[2-(2-propynylsulfanyl)phenyl]-1,4,5,6-tetrahydropyrimidine hydrobromide; ΔMass: 86.1485 Da]	unannotated	0.00145613	0.994249	0.997261	Positive
x00987		unannotated	-0.000999716	0.996051	0.997261	Negative
sl00273	Hexanoyl Glycine	2a	-0.000715335	0.997175	0.997261	Negative
sl00158	Uracil	2a	-0.000693582	0.997261	0.997261	Negative
