# Supplementary material for: Rasal1: A candidate exercise mimetic to increase adult hippocampal neurogenesis in middle age
Source: Research Square preprint supplement (doi:10.21203/rs.3.rs-8394751/v1), 2026-02-13
Supplement: Supplementary file 3 [file 410a9a500322ad42bfdc4832.xlsx]

## Sheet: Info
sheet	study	matrix	modality	contrast
2	Discovery	Serum	Metabolomics	Exercise.VS.Sedentary.IN.Young
3	Discovery	Serum	Metabolomics	Middle_aged.VS.Young.IN.Sedentary
4	Discovery	Dentate Gyrus (Dorsal)	Proteomics	Exercise.VS.Sedentary.IN.Young
5	Discovery	Dentate Gyrus (Ventral)	Proteomics	Exercise.VS.Sedentary.IN.Young
6	Discovery	Dentate Gyrus	Proteomics	Exercise.VS.Sedentary.IN.Young
7	Discovery	Dentate Gyrus (Dorsal)	Proteomics	Middle_aged.VS.Young.IN.Sedentary
8	Discovery	Dentate Gyrus (Ventral)	Proteomics	Middle_aged.VS.Young.IN.Sedentary
9	Discovery	Dentate Gyrus	Proteomics	Middle_aged.VS.Young.IN.Sedentary
10	Discovery	Serum	Proteomics	Exercise.VS.Sedentary.IN.Young
11	Discovery	Serum	Proteomics	Middle_aged.VS.Young.IN.Sedentary
12	Validation	Dentate Gyrus	Proteomics	Exercise.VS.Sedentary.IN.Young
13	Validation	Dentate Gyrus	Proteomics	Middle_aged.VS.Young.IN.Sedentary

## Sheet: sheet_2
compound_id	compound_name	hmdb_id	annotation_level	log_fc	ci_l	ci_r	ave_expr	t	p_value	adj_p_val	global_adj_p_val	b
x00548	3-Hydroxy-3-[(3-methylbutanoyl)oxy]-4-(trimethylammonio)butanoate		3	0.668806	0.461096	0.876515	22.9548	6.61889	5.10844e-07	0.000240097	0.000160065	6.302
x00891	3,3'-Methylenebis([1,2,4]triazolo[4,3-a]pyridine)		3	-1.57466	-2.19132	-0.958004	21.3806	-5.24911	1.74786e-05	0.00410747	0.00164299	2.98709
x00072	Urea	HMDB0000294	2a	0.450613	0.249482	0.651744	27.3812	4.60539	9.54345e-05	0.0149514	0.0049838	1.38943
x00889			unannotated	0.518157	0.277753	0.758561	21.7369	4.43059	0.000151316	0.0177797	0.00748618	0.956155
x00960	5-Hydroxytryptophol		3	1.06496	0.543508	1.58641	20.1202	4.19818	0.000278775	0.0262048	0.0119113	0.38263
sl00225	1-Phenylethyl acetate	HMDB0032620	2a	-0.901484	-1.36026	-0.44271	20.1388	-4.03925	0.000422543	0.0330992	0.0154687	-0.00697461
x01095	DL-4-Hydroxyphenyllactic acid		2b	-0.354773	-0.546327	-0.16322	21.3923	-3.8062	0.000769081	0.0516383	0.0212628	-0.567947
sl00041	Threonine	HMDB0000167	1	-0.283941	-0.449863	-0.118018	25.0343	-3.51764	0.00162224	0.0873502	0.0381226	-1.26094
x00588	lys-gln		3	0.531791	0.219234	0.844347	22.3508	3.49747	0.00170863	0.0873502	0.0382408	-1.30889
x00495	Histamine		2b	0.317412	0.12907	0.505754	23.7513	3.46432	0.00185852	0.0873502	0.0397047	-1.38679
x00342	5-Nitro-o-toluidine		3	-0.3498	-0.56225	-0.13735	24.5892	-3.38459	0.00227314	0.0971251	0.0453952	-1.57308
x00756	[Similar to: 4-(3,4-dimethoxyphenyl)-3-methyl-1H-pyrazol-5-amine; ΔMass: -0.0457 Da]		unannotated	-0.851634	-1.39142	-0.311849	22.0507	-3.2432	0.00323846	0.12684	0.0525971	-1.89946
x00076	[Similar to: N-allyl-2-(2-methyl-1-benzofuran-3-yl)acetamide; ΔMass: -51.9738 Da]		unannotated	0.525006	0.186196	0.863816	26.4901	3.1853	0.00373888	0.134672	0.0549148	-2.03156
x01263			unannotated	-0.421247	-0.695558	-0.146937	20.95	-3.15663	0.00401151	0.134672	0.0571337	-2.0963
sl00044	Tyrosine	HMDB0000158	1	-0.193623	-0.322456	-0.0647903	22.5744	-3.0886	0.00472679	0.148106	0.0649455	-2.24758
x00904	Ecgonine		2b	0.430759	0.138068	0.72345	21.4142	3.02529	0.00553764	0.154255	0.0714361	-2.39127
x00992	N-(3-acetamidopropyl)pyrrolidin-2-one		3	-0.38251	-0.642682	-0.122337	21.7713	-3.0222	0.00557944	0.154255	0.0714361	-2.39814
x00810	N-Benzylformamide		2b	-0.192088	-0.328105	-0.0560703	22.607	-2.90226	0.00743253	0.160858	0.0812393	-2.66025
sl00062	3-(3-Hydroxyphenyl)propionic acid	HMDB0000375	1	1.24431	0.361044	2.12758	20.38	2.89587	0.00757049	0.160858	0.0817961	-2.676
x00807	[Similar to: N-Cyclopropyl-2-[(2S,3R,4S,5R)-5-({[(3,5-dimethoxyphenyl)carbamoyl]amino}methyl)-3,4-dihydroxytetrahydro-2-furanyl]acetamide; ΔMass: -257.1341 Da]		unannotated	0.612022	0.173496	1.05055	21.4948	2.86889	0.00807547	0.160858	0.0820918	-2.7346
x01226			unannotated	0.13978	0.0394258	0.240134	21.2962	2.86247	0.00817614	0.160858	0.0820918	-2.74677
sl00236	Indole-3-acetic acid	HMDB0000197	1	0.35412	0.0967789	0.611461	23.1079	2.82868	0.00888768	0.160858	0.0849816	-2.82142
sl00286	Melatonin	HMDB0001389	2a	-0.598814	-1.03466	-0.162967	20.4615	-2.82423	0.00898216	0.160858	0.0849816	-2.83099
x00574	N-Acetylvaline		3	0.194334	0.0521803	0.336488	23.4008	2.80945	0.00927682	0.160858	0.0849816	-2.8611
x00742	9-methylhypoxanthine		3	-0.209541	-0.362848	-0.0562337	22.8219	-2.80891	0.00928883	0.160858	0.0849816	-2.86227
x00130	[Similar to: 4-{[2-(4-fluorophenyl)-2-oxoethyl]amino}-4-oxobutanoic acid; ΔMass: -117.1731 Da]		unannotated	0.618385	0.165464	1.07131	25.7886	2.80659	0.00936608	0.160858	0.0849816	-2.86885
x00315			unannotated	-0.623203	-1.08103	-0.165375	24.0479	-2.79814	0.00955537	0.160858	0.0849816	-2.88694
x00773			unannotated	-0.218326	-0.378811	-0.05784	22.647	-2.79576	0.00958303	0.160858	0.0849816	-2.89045
x00945	[Similar to: 2-({2-[(1,3-Dimethyl-1H-pyrazol-5-yl)amino]-2-oxoethyl}sulfanyl)acetic acid; ΔMass: -148.0069 Da]		unannotated	-0.254568	-0.450403	-0.0587333	21.8838	-2.67158	0.0128353	0.208021	0.0965216	-3.15341
x00366			unannotated	-0.212582	-0.377188	-0.0479761	24.4731	-2.65467	0.013371	0.209479	0.0981935	-3.18954
x00699			unannotated	0.115304	0.0238314	0.206776	23.229	2.59051	0.0154757	0.234631	0.106964	-3.32108
sl00030	Pantothenic acid	HMDB0000210	1	0.231357	0.0431964	0.419517	21.8568	2.52688	0.0178999	0.261763	0.119332	-3.45078
x00780			unannotated	-2.12874	-3.86786	-0.389619	21.4412	-2.51614	0.0183791	0.261763	0.120814	-3.47351
sl00248	7-Methylguanine	HMDB0000897	1	-0.16818	-0.308648	-0.0277115	22.5659	-2.46052	0.0207998	0.287526	0.129482	-3.58402
sl00043	Tryptophan	HMDB0000929	1	-0.171592	-0.320158	-0.0230257	23.9515	-2.3738	0.0252559	0.310355	0.142398	-3.75511
x00862	1-Vinylimidazole		2b	0.217836	0.0290148	0.406656	22.2372	2.37101	0.0254075	0.310355	0.142398	-3.76045
x00355	4-Hydroxyproline	HMDB0000725	2a	-0.250416	-0.467607	-0.0332243	24.163	-2.37007	0.025494	0.310355	0.142398	-3.76289
x01064	6-Methylquinoline		2b	-0.156361	-0.292242	-0.020479	21.7533	-2.36482	0.0257488	0.310355	0.142398	-3.77233
sl00294	N-Acetyl-tryptophan	HMDB0013713	2a	-0.365576	-0.683281	-0.0478708	19.574	-2.36475	0.0257528	0.310355	0.142398	-3.77247
x01340			unannotated	0.432573	0.0500407	0.815105	20.2169	2.32452	0.0281827	0.331147	0.151381	-3.85092
x01417			unannotated	0.173582	0.0187226	0.328441	19.9945	2.30355	0.0294601	0.336882	0.156298	-3.89039
x01176	1-Phenyl-1H-pyrazolo[3,4-d]pyrimidin-4-amine		3	-0.289649	-0.550451	-0.0288476	18.4196	-2.28241	0.03085	0.336882	0.159335	-3.93067
x01367			unannotated	-0.30517	-0.583596	-0.026744	20.1756	-2.25249	0.0329183	0.336882	0.163721	-3.98725
x00439			unannotated	0.0964344	0.00784362	0.185025	24.41	2.23704	0.0340347	0.336882	0.166668	-4.01626
x00266	3-Methylhistidine	HMDB0000479	1	-0.22982	-0.440951	-0.0186899	25.1723	-2.23759	0.0340428	0.336882	0.166668	-4.01584
x00703			unannotated	0.0910331	0.00579581	0.17627	23.124	2.19483	0.0372624	0.336882	0.176575	-4.09489
x01160			unannotated	-0.301653	-0.585193	-0.0181142	21.165	-2.18694	0.0379448	0.336882	0.176575	-4.10999
x00035	[Similar to: 1,10-Diamino-4,7-dioxadecane; ΔMass: -13.0316 Da]		unannotated	-0.230289	-0.44848	-0.0120973	28.8081	-2.16959	0.0393719	0.336882	0.182313	-4.14192
x01191			unannotated	0.110846	0.00552468	0.216168	21.3579	2.16289	0.0398846	0.336882	0.182373	-4.15369
sl00067	Indole-3-acrylic acid	HMDB0000734	2a	-0.345072	-0.673086	-0.0170583	21.4157	-2.16252	0.0399669	0.336882	0.182373	-4.15487
x01042			unannotated	0.101091	0.00480407	0.197378	22.0246	2.15763	0.0403326	0.336882	0.183153	-4.16333
x00142	2-Methoxy-5-methylaniline		2b	-0.139743	-0.273269	-0.00621606	26.6105	-2.15088	0.040924	0.336882	0.184945	-4.17576
x00353	L-Ascorbic acid 2-sulfate		2b	0.419213	0.0166201	0.821806	23.873	2.14048	0.0418741	0.336882	0.187123	-4.19508
x00979	[Similar to: N-[2-(1,5-dimethyl-4-nitro-1H-pyrazol-3-yl)vinyl]-N,N-dimethylamine; ΔMass: 0.9862 Da]		unannotated	0.396898	0.0156333	0.778162	21.2793	2.1399	0.0419248	0.336882	0.187123	-4.19613
x01188			unannotated	0.256472	0.00999651	0.502947	20.8639	2.13856	0.0420035	0.336882	0.187123	-4.1982
x00397	2-[(1,5-dimethyl-2-benzimidazolyl)amino]ethanol		3	-0.314695	-0.617436	-0.011953	23.4093	-2.13678	0.0422022	0.336882	0.187123	-4.20181
x01051	6-Methylindole		2b	-0.13365	-0.262548	-0.00475271	21.8188	-2.13087	0.0426793	0.336882	0.187157	-4.21207
x00138	Indoline		3	-0.143577	-0.282077	-0.00507581	26.672	-2.13058	0.0427215	0.336882	0.187157	-4.21273
x01262	2-Oxindole		2b	-0.733285	-1.4416	-0.0249671	19.8082	-2.12807	0.042983	0.336882	0.187157	-4.21759
x00657	4-Methyl-N-(4-pyridinylmethyl)benzenesulfonamide		3	0.194412	0.00659644	0.382228	22.914	2.12775	0.0430062	0.336882	0.187157	-4.21812
sl00298	Octanoylcarnitine	HMDB0000791	2a	-0.281046	-0.555612	-0.00648059	20.5649	-2.10371	0.0451959	0.343513	0.19311	-4.26118
x00734	glutaral		3	0.23392	0.00513751	0.462703	22.2851	2.10178	0.0454209	0.343513	0.193193	-4.265
x00698			unannotated	0.119648	0.00226208	0.237034	23.1521	2.09469	0.0460454	0.343513	0.194524	-4.27727
x01147	Helicin		3	-1.54381	-3.08773	0.00011301	18.3265	-2.05547	0.0500156	0.35451	0.203265	-4.34748
x01252			unannotated	0.133382	-0.000104913	0.266869	21.1085	2.05348	0.0501675	0.35451	0.203265	-4.35062
x00591	3,5-Dihydroxybenzoic acid		2b	0.637804	-0.00409329	1.2797	22.2713	2.04251	0.0513729	0.35451	0.205881	-4.37033
sl00181	Alanine	HMDB0000161	2a	-0.109256	-0.219619	0.00110591	26.1407	-2.0345	0.0521732	0.35451	0.205881	-4.38404
sl00227	2-Aminoadipic acid	HMDB0000510	2a	-0.121338	-0.24396	0.00128358	24.0042	-2.03358	0.0522721	0.35451	0.205881	-4.38565
sl00207	Phenylalanine	HMDB0000159	1	-0.123768	-0.248887	0.00135166	28.844	-2.03289	0.0523463	0.35451	0.205881	-4.38686
x01078	Hydrogen bromide		3	-0.193006	-0.388736	0.00272499	21.5303	-2.02648	0.0530417	0.35451	0.20603	-4.39809
x00104	DL-Stachydrine		2b	0.317913	-0.00658532	0.642412	26.3561	2.0139	0.0544858	0.35451	0.210768	-4.4204
sl00278	Homocysteine	HMDB0000742	2a	-0.30913	-0.62606	0.00779986	18.8583	-2.00451	0.0554868	0.35451	0.213283	-4.43639
x01281	N-(2-oxolanylmethyl)-1-phenyl-4-pyrazolo[3,4-d]pyrimidinamine		3	0.471516	-0.0123686	0.955402	19.5385	2.00307	0.0557066	0.35451	0.213283	-4.43922
x00472	[Similar to: 6-[4-(3,4-dimethoxyphenyl)-hexahydrofuro[3,4-c]furan-1-yl]-4-methoxy-2H-1,3-benzodioxole; ΔMass: -136.3069 Da]		unannotated	0.130089	-0.00347538	0.263653	24.0332	2.00162	0.0558165	0.35451	0.213283	-4.44141
x00307	g-Butyrobetaine		3	-0.459577	-0.937218	0.0180649	23.8853	-1.97787	0.0586422	0.366664	0.22138	-4.48274
x00464	Furfural		3	-0.299865	-0.612372	0.0126427	23.5852	-1.97246	0.0592904	0.366664	0.222932	-4.49204
x00060	D-Xylonic acid		3	-0.129788	-0.266112	0.00653477	28.4182	-1.95674	0.0611685	0.370461	0.228168	-4.51872
sl00076	4-Methyl-2-oxovaleric acid	HMDB0000695	2a	-0.268123	-0.55084	0.0145946	26.096	-1.9495	0.0621087	0.370461	0.230081	-4.53125
x00964	3-Hydroxydecanoic acid		2b	0.552801	-0.0304727	1.13607	21.0057	1.94822	0.0622689	0.370461	0.230081	-4.53342
x01145	[Similar to: Evonine; ΔMass: -542.1590 Da]		unannotated	-0.305481	-0.6296	0.0186376	20.5626	-1.93741	0.0636392	0.371698	0.232766	-4.55176
x00524	[Similar to: GPH; ΔMass: -198.1141 Da]		unannotated	-0.126865	-0.261695	0.00796455	23.7236	-1.93369	0.0640586	0.371698	0.233059	-4.55778
x00784	Pinolenic acid		2b	0.799658	-0.0699134	1.66923	19.9811	1.89035	0.0699176	0.393384	0.248949	-4.63072
sl00297	N-Acetyl-glutamine	HMDB0006029	2a	0.239577	-0.0220921	0.501246	21.4772	1.88207	0.071076	0.393384	0.250795	-4.64446
x00208	Methionine sulfoxide	HMDB0002005	2a	0.463362	-0.0429333	0.969656	18.9479	1.8813	0.0711836	0.393384	0.250795	-4.64573
sl00267	Galactosamine/Glucosamine		2a	-0.114352	-0.239778	0.0110738	27.8322	-1.87365	0.0722113	0.393384	0.251402	-4.65816
x00685			unannotated	0.100832	-0.00993844	0.211603	23.1981	1.87071	0.0726327	0.393384	0.251936	-4.66302
x01227	Dipropyl sulfite		3	0.300114	-0.0305286	0.630756	20.3833	1.86574	0.0733992	0.393384	0.25273	-4.67139
x01196			unannotated	0.334793	-0.0373303	0.706916	20.6049	1.8494	0.0758097	0.393384	0.257804	-4.69823
sl00189	Creatine	HMDB0000064	1	0.239117	-0.0278145	0.506049	28.853	1.84142	0.0770072	0.393384	0.257804	-4.71126
x01085	4,4'-Bipyridine		2b	-0.128143	-0.271203	0.014917	21.6313	-1.84081	0.0770398	0.393384	0.257804	-4.71206
x00981			unannotated	0.0866427	-0.0100954	0.183381	22.0795	1.84063	0.0770669	0.393384	0.257804	-4.71235
x00171			unannotated	0.06303	-0.00743692	0.133497	26.4444	1.8382	0.0774343	0.393384	0.258114	-4.7163
x00256	Malondialdehyde		3	-0.154322	-0.327109	0.0184658	25.4339	-1.83593	0.0778399	0.393384	0.258549	-4.72019
x01318	4-vinylphenol sulfate		3	0.817797	-0.100861	1.73645	19.3229	1.82993	0.0787598	0.393799	0.259485	-4.72994
sl00211	Pyridoxal	HMDB0001545	1	0.21584	-0.0306423	0.462323	24.3417	1.80007	0.0834752	0.406824	0.2697	-4.77807
x01194			unannotated	0.17644	-0.0252948	0.378175	21.0767	1.79741	0.0838447	0.406824	0.2697	-4.78215
sl00011	cis-Aconitic acid	HMDB0000072	2a	0.315507	-0.0453926	0.676407	20.4274	1.79707	0.0839615	0.406824	0.2697	-4.78287
x00406			unannotated	0.0682676	-0.0102842	0.146819	24.4499	1.78603	0.085712	0.411068	0.273116	-4.80032
x00456	ARECOLINE		3	-0.1414	-0.304923	0.0221224	23.9636	-1.77744	0.0871962	0.412571	0.276907	-4.8141
sl00115	Hippuric acid	HMDB0000714	1	-0.600497	-1.29631	0.0953137	24.0871	-1.77403	0.0877812	0.412571	0.277826	-4.81953
x00888	[Similar to: ethyl 2-[({[3-(2,6-dichlorophenyl)-5-methylisoxazol-4-yl]amino}carbonyl)amino]-4-methylthiophene-3-carboxylate; ΔMass: -296.0119 Da]		unannotated	0.751326	-0.125554	1.62821	21.0368	1.76129	0.0899578	0.413202	0.283475	-4.83966
sl00064	3-Hydroxy-2-methyl-4-pyrone	HMDB0030776	2a	0.313933	-0.0527043	0.680571	19.6148	1.75984	0.0901692	0.413202	0.283475	-4.84185
x01369			unannotated	-0.123669	-0.268683	0.0213454	20.5931	-1.75259	0.091407	0.413202	0.28459	-4.85319
x00002			unannotated	-0.254346	-0.552632	0.0439407	30.5595	-1.7528	0.091432	0.413202	0.28459	-4.853
x00689			unannotated	0.0730001	-0.0129185	0.158919	23.1362	1.74609	0.0925504	0.414273	0.285999	-4.86337
x00274	Mefenamic acid		3	0.170806	-0.0354535	0.377066	25.0051	1.70228	0.100642	0.441028	0.304603	-4.93137
x00504	3-(propan-2-yl)-octahydropyrrolo[1,2-a]pyrazine-1,4-dione		2b	-0.178328	-0.393763	0.0371058	23.6243	-1.70156	0.100778	0.441028	0.304603	-4.93247
x01212	[Similar to: 1-(4-methoxyphenyl)propane-1,2-diol; ΔMass: -52.0524 Da]		unannotated	-0.13571	-0.299934	0.0285137	21.1414	-1.69827	0.101343	0.441028	0.305327	-4.9374
x00162	Dimethyl fumarate		3	-0.199034	-0.441901	0.0438332	24.2755	-1.68461	0.104042	0.448622	0.312459	-4.95834
x00572	p-Cresylsulfate		3	-1.20133	-2.67263	0.269974	19.3146	-1.67842	0.105256	0.449549	0.314097	-4.96774
x01067			unannotated	-0.213079	-0.474764	0.0486058	21.5365	-1.6738	0.10617	0.449549	0.315822	-4.97474
x00925	Ile-cys		3	-0.119058	-0.266108	0.0279917	22.1681	-1.66389	0.10809	0.45313	0.31951	-4.9896
x00365	2-Nitro-9H-fluorene		3	-0.185548	-0.417898	0.0468016	23.8658	-1.64156	0.112735	0.45313	0.326063	-5.02314
x00024			unannotated	-0.296675	-0.669889	0.0765393	29.6163	-1.63405	0.114312	0.45313	0.327682	-5.03431
x01202			unannotated	0.335377	-0.0867498	0.757503	20.4437	1.63317	0.114496	0.45313	0.327682	-5.03561
x00388			unannotated	0.0709992	-0.0184509	0.160449	24.5178	1.63119	0.114854	0.45313	0.327682	-5.03847
x01303	[Similar to: 4-{[2-(4-fluorophenyl)-2-oxoethyl]amino}-4-oxobutanoic acid; ΔMass: -36.9946 Da]		unannotated	-0.882019	-1.99497	0.23093	17.5522	-1.62909	0.115363	0.45313	0.327682	-5.04166
x01353			unannotated	-0.129409	-0.293026	0.0342089	20.6051	-1.62542	0.116083	0.45313	0.327682	-5.04701
x01398			unannotated	-0.741016	-1.68086	0.198824	19.3448	-1.62075	0.117149	0.45313	0.327888	-5.05398
x00357	D-Mannoheptulose		3	0.306564	-0.082315	0.695443	24.2716	1.6205	0.117202	0.45313	0.327888	-5.05435
x01065			unannotated	-0.237596	-0.540293	0.0651017	18.2849	-1.6131	0.118744	0.45313	0.330418	-5.06516
x00440	Dihydroxyindole		3	-0.411776	-0.938589	0.115037	23.3321	-1.60674	0.1202	0.45313	0.331342	-5.07455
x00302			unannotated	0.0741701	-0.0208501	0.16919	25.199	1.60415	0.120709	0.45313	0.331774	-5.07828
x00674	(4S,5R)-4,5-Dihydroxy-3-oxo-1-cyclohexene-1-carboxylate		3	-0.408193	-0.932052	0.115666	22.3646	-1.60175	0.121304	0.45313	0.332436	-5.08186
x00063			unannotated	0.151418	-0.0433455	0.346182	28.2963	1.59813	0.122108	0.45313	0.333667	-5.08713
x00968	[Similar to: Microcystin LF; ΔMass: -455.2136 Da]		unannotated	-0.627384	-1.43554	0.180775	19.928	-1.5958	0.122629	0.45313	0.334118	-5.09053
x01351			unannotated	0.105262	-0.0305971	0.241121	20.6894	1.59226	0.12336	0.45313	0.334304	-5.09561
sl00131	N-Acetyl-alanine	HMDB0000766	2a	-0.20026	-0.459422	0.0589027	19.4672	-1.58801	0.12432	0.45313	0.334861	-5.10179
x00515			unannotated	-0.0953893	-0.219024	0.0282452	23.8159	-1.58559	0.124869	0.45313	0.334861	-5.10529
x00405	[Similar to: N-(2-hydroxyethyl)-N'-propylthiourea; ΔMass: 41.8899 Da]		unannotated	-0.47904	-1.10078	0.142698	22.7472	-1.58382	0.125334	0.45313	0.334861	-5.10791
x00179	[Similar to: N-[4,5-dihydroxy-2-({4-[hydroxy(phenyl)methyl]-5-oxo-3-phenyl-2,5-dihydrofuran-2-yl}oxy)-6-(methoxymethyl)oxan-3-yl]acetamide; ΔMass: -382.1044 Da]		unannotated	0.151128	-0.0491091	0.351364	26.1321	1.55147	0.132889	0.473166	0.350887	-5.15433
x00178	Pulcherriminic acid		3	0.151128	-0.0491091	0.351364	26.1321	1.55147	0.132889	0.473166	0.350887	-5.15433
sl00204	Nicotine amide	HMDB0001406	2a	-0.173402	-0.404768	0.0579648	27.756	-1.54062	0.135504	0.475703	0.355793	-5.16971
sl00308	Sugar alcohol (C6)		2a	-0.286605	-0.6696	0.0963891	19.0815	-1.5379	0.136106	0.475703	0.356377	-5.17352
x01243	[Similar to: 1-(3,4-dimethoxyphenyl)ethan-1-one oxime; ΔMass: -102.0556 Da]		unannotated	-0.540651	-1.26422	0.182914	20.5222	-1.53597	0.136638	0.475703	0.356777	-5.17628
x00710			unannotated	0.063587	-0.0217834	0.148957	23.0568	1.53071	0.137867	0.476451	0.357972	-5.18365
sl00118	Homocitrulline	HMDB0000679	2a	-0.226934	-0.534087	0.0802187	18.1405	-1.51837	0.140937	0.483506	0.363958	-5.20096
x01056	[Similar to: 3-hydroxy-2-(3-nitro-4-piperidinobenzyl)propanenitrile; ΔMass: -130.0547 Da]		unannotated	-0.099645	-0.23551	0.0362204	21.8372	-1.50722	0.143756	0.489394	0.369065	-5.21649
sl00015	Galactonic/Gluconic acid		2a	0.282733	-0.10379	0.669256	22.794	1.50364	0.144736	0.489394	0.369705	-5.22149
x01012			unannotated	0.30959	-0.128447	0.747628	20.8023	1.45284	0.158241	0.52878	0.395603	-5.29089
sl00158	Uracil	HMDB0000300	2a	0.141522	-0.0595069	0.34255	20.7305	1.44676	0.159862	0.52878	0.398595	-5.29906
x00373	4-(2-Hydroxyethyl)phenyl hydrogen sulfate		3	-0.123961	-0.300651	0.0527288	24.5316	-1.44217	0.161204	0.52878	0.39982	-5.30522
x00672	Hexanoylcarnitine		2b	-0.223049	-0.541956	0.0958581	22.4883	-1.43773	0.162448	0.52878	0.400381	-5.31115
x01180	[Similar to: 1-chloro-2-[({[(1-cyclopropylethylidene)amino]oxy}carbonyl)amino]benzene; ΔMass: -108.0420 Da]		unannotated	-0.172555	-0.419579	0.0744694	21.0771	-1.43569	0.162985	0.52878	0.400381	-5.31387
x00389	5alpha-androstane-3alpha-glcosyl-17beta-diol		3	-0.750195	-1.82462	0.324225	22.8284	-1.4353	0.163134	0.52878	0.400381	-5.3144
x00783			unannotated	0.0719844	-0.0314843	0.175453	22.896	1.42975	0.164644	0.530018	0.401259	-5.32177
x01317	Ethyl acetate		3	0.306258	-0.146128	0.758644	19.9312	1.39162	0.17584	0.555235	0.42032	-5.37185
sl00135	N-acetyl-methionine	HMDB0011745	2a	-0.160712	-0.398557	0.0771329	18.7242	-1.38863	0.176678	0.555235	0.420448	-5.37574
x01395			unannotated	0.130626	-0.0630429	0.324295	20.2044	1.38612	0.177433	0.555235	0.421179	-5.37899
x00762			unannotated	0.0612146	-0.0297043	0.152133	22.9331	1.38367	0.178174	0.555235	0.421874	-5.38216
x00330			unannotated	0.0689127	-0.0335826	0.171408	24.8508	1.38174	0.178759	0.555235	0.422195	-5.38465
x00119	2-Oxobutyric acid		3	-0.116793	-0.290856	0.0572691	27.0395	-1.37929	0.179565	0.555235	0.423037	-5.3878
sl00057	2/3-Hydroxybutyric acid		2a	-0.275098	-0.68676	0.136564	25.4011	-1.37369	0.181278	0.555464	0.426003	-5.395
x01198	Glutaric acid	HMDB0000661	2a	0.23737	-0.118484	0.593224	20.6834	1.37118	0.182048	0.555464	0.426746	-5.39822
x00726	[Similar to: 1-(3-{[(4-Hydroxypyrimidin-2-yl)thio]methyl}-4-methoxyphenyl)ethan-1-one; ΔMass: -7.1007 Da]		unannotated	-0.144182	-0.360915	0.0725514	22.7364	-1.3675	0.183185	0.555464	0.428343	-5.40293
x00098	Xanthurenate		3	0.199825	-0.102488	0.502138	19.2136	1.35839	0.18596	0.560263	0.43281	-5.41456
x01120			unannotated	0.0644104	-0.0337489	0.16257	21.6717	1.34851	0.189073	0.563574	0.436576	-5.42708
sl00083	Pentose		2a	-0.109287	-0.276313	0.0577391	22.0838	-1.34467	0.190296	0.563574	0.436576	-5.43193
sl00012	Citrulline	HMDB0000904	1	-0.0884012	-0.224234	0.0474318	23.8675	-1.33747	0.192602	0.563574	0.438336	-5.44099
x01374	[Similar to: (1R,9R)-5-Cyclohexyl-11-(propylsulfonyl)-7,11-diazatricyclo[7.3.1.02,7]trideca-2,4-dien-6-one; ΔMass: -172.1016 Da]		unannotated	-0.109751	-0.278533	0.0590319	20.4737	-1.33632	0.192973	0.563574	0.438336	-5.44243
x00296	Indole-3-carbidol		3	-0.453114	-1.15016	0.24393	23.7892	-1.33625	0.193054	0.563574	0.438336	-5.4425
x00908	[Similar to: N1-[4-(tert-Butyl)phenyl]-2-[(1-methyl-1H-imidazol-2-yl)thio]acetamide; ΔMass: -123.0644 Da]		unannotated	0.45456	-0.248576	1.1577	20.7121	1.32891	0.195434	0.564299	0.438748	-5.45168
x01275			unannotated	0.0772707	-0.0423159	0.196857	20.944	1.32789	0.195704	0.564299	0.438748	-5.45296
x00713			unannotated	0.064519	-0.0369019	0.16594	22.9474	1.30735	0.202489	0.574228	0.447741	-5.47841
x00821	cis-4-Decenoyl carnitine		3	-0.208822	-0.537886	0.120243	21.6761	-1.30448	0.203511	0.574228	0.447741	-5.48192
sl00129	Leucyl-alanine	HMDB0028922	2a	0.254037	-0.146889	0.654962	18.7365	1.30216	0.204231	0.574228	0.447741	-5.48478
x01360	Coumachlor		3	0.116693	-0.0675206	0.300907	20.4702	1.30183	0.204342	0.574228	0.447741	-5.48519
x00243	4-Hydroxy-5-methylfuran-3(2H)-one		3	-0.0957272	-0.247314	0.0558592	25.573	-1.29793	0.205684	0.574228	0.449634	-5.48996
x00830	[Similar to: R-Palmitoyl-(1-methyl) Ethanolamide; ΔMass: -96.1256 Da]		unannotated	0.375067	-0.220257	0.97039	21.3782	1.29508	0.206684	0.574228	0.449728	-5.49341
x00789	N-4-hydroxyphenylacetylglutamic acid		3	0.324206	-0.191577	0.83999	22.0407	1.2921	0.207699	0.574228	0.450895	-5.49705
x01156			unannotated	-0.163246	-0.423701	0.0972093	21.2811	-1.2884	0.208964	0.574346	0.451554	-5.50154
x01407	2-(5-Amino-4-cyano-1H-imidazol-1-yl)-5-(4-methyl-1-piperazinyl)benzoic acid		3	0.337937	-0.207478	0.883352	19.4664	1.27365	0.214065	0.580943	0.457414	-5.51936
x00379	Biacetyl		3	-0.131602	-0.344099	0.0808946	23.4863	-1.27307	0.214268	0.580943	0.457414	-5.52006
x00828	Benzoyl cyanide		3	0.293816	-0.182207	0.76984	21.7403	1.26879	0.215768	0.580943	0.457414	-5.5252
x00556	Diethyl phthalate		3	0.134681	-0.0841388	0.353501	23.4282	1.26521	0.217028	0.580943	0.457414	-5.52948
x00421	[Similar to: N'3-(3,5-dibromo-4-hydroxybenzylidene)-5-methylisoxazole-3-carbohydrazide; ΔMass: -253.9044 Da]		unannotated	0.116279	-0.0729487	0.305506	24.1065	1.26316	0.217752	0.580943	0.457912	-5.53193
x00727	(2E)-octenoylcarnitine		3	-0.328958	-0.865525	0.207609	21.6752	-1.26026	0.218781	0.580943	0.459049	-5.53539
x00829	2-Pyrrolidone		3	0.0858576	-0.0547248	0.22644	22.1666	1.2551	0.220558	0.582372	0.461747	-5.54155
x01287	2-Acetylphenanthrene		3	-0.130328	-0.344325	0.0836684	20.653	-1.25159	0.221814	0.582418	0.463346	-5.54571
x00172	[Similar to: Acetyl-L-carnitine; ΔMass: 28.0345 Da]		unannotated	-0.218646	-0.579689	0.142397	25.9198	-1.24487	0.224292	0.584006	0.466449	-5.55362
x00616	validamine 7-phosphate		3	0.153292	-0.100146	0.40673	19.1282	1.24302	0.224904	0.584006	0.466689	-5.55582
sl00224	1-Methyl Adenosine	HMDB0003331	1	-0.0768105	-0.20455	0.0509287	21.9434	-1.23574	0.227556	0.585649	0.470339	-5.56437
sl00169	N-Acetyl-ornithine	HMDB0003357	2a	0.0822928	-0.0548997	0.219485	20.3926	1.23271	0.228665	0.585649	0.470339	-5.56791
x00261	gaboxadol		3	0.565083	-0.3809	1.51107	23.7543	1.22792	0.230487	0.585649	0.473051	-5.57347
x01258			unannotated	0.0702628	-0.0475568	0.188083	21.1384	1.22557	0.231298	0.585649	0.473612	-5.57623
x00378			unannotated	0.0457637	-0.0310542	0.122582	24.5702	1.22431	0.231768	0.585649	0.473612	-5.5777
x01363	[Similar to: N,N-Diethyl-3-[(2S,5aS,8aR)-1-methyl-5-oxodecahydropyrrolo[3,2-E][1,4]diazepin-2-yl]propanamide; ΔMass: -142.1469 Da]		unannotated	-0.19007	-0.510951	0.130811	20.141	-1.21737	0.234361	0.589036	0.475809	-5.58572
sl00125	3-Indoxylsulfuric acid	HMDB0000682	1	0.301012	-0.210295	0.81232	22.7226	1.21016	0.237113	0.591231	0.479325	-5.594
sl00134	N-Acetyl-phenylalanine	HMDB0000512	2a	0.20052	-0.14114	0.54218	18.3491	1.20613	0.238581	0.591231	0.481258	-5.59866
sl00199	Leucine	HMDB0000687	1	-0.0832238	-0.225303	0.0588555	29.4288	-1.2039	0.23945	0.591231	0.481976	-5.60121
x00768	Edaravone		3	-0.505844	-1.37289	0.3612	21.3598	-1.19927	0.241247	0.591231	0.483049	-5.60647
sl00018	Glutamine	HMDB0000641	2a	-0.0804915	-0.218529	0.0575462	26.712	-1.19845	0.241524	0.591231	0.483049	-5.60743
sl00008	Asparagine	HMDB0000168	2a	-0.106121	-0.29042	0.0781771	21.7579	-1.18335	0.247333	0.591906	0.487165	-5.62455
x00505	2-Oxindole		2b	0.308534	-0.22843	0.845498	22.8847	1.18114	0.24825	0.591906	0.487165	-5.627
x01059	2-(5-Amino-4-cyano-1H-imidazol-1-yl)-5-(4-methyl-1-piperazinyl)benzoic acid		3	0.278939	-0.206642	0.764519	21.1607	1.18084	0.248367	0.591906	0.487165	-5.62734
x00799	5-guanidino-2-oxopentanoic acid		3	0.297238	-0.22033	0.814807	21.5707	1.18054	0.248484	0.591906	0.487165	-5.62767
x01237	2-Oxoglutarate dianion		3	0.249961	-0.186991	0.686914	20.4874	1.17593	0.250289	0.591906	0.487165	-5.63284
x00539	3,4,5-trimethoxyhydrocinnamic acid		3	0.107865	-0.0808669	0.296596	23.5038	1.17483	0.250718	0.591906	0.487165	-5.63407
x00608	D-(−)-Erythrose		3	-0.164271	-0.452356	0.123814	23.0579	-1.17215	0.251775	0.591906	0.487165	-5.63707
sl00299	2-Hydroxyphenylacetic acid/ Vanillin		2a	0.180984	-0.136436	0.498405	19.2221	1.17176	0.251875	0.591906	0.487165	-5.63754
x01387			unannotated	0.114717	-0.0873246	0.316758	20.4578	1.16686	0.253813	0.593494	0.488903	-5.643
x00525			unannotated	0.0416666	-0.0321335	0.115467	23.9614	1.16028	0.256433	0.596231	0.49294	-5.6503
x00555	Dobesilic acid		3	0.424239	-0.331214	1.17969	22.6608	1.15437	0.258858	0.596231	0.49377	-5.65679
x00748			unannotated	0.0576293	-0.0453765	0.160635	22.935	1.14977	0.260658	0.596231	0.493988	-5.66188
x01390	Idebenone		3	-0.213524	-0.595971	0.168923	20.289	-1.14767	0.261565	0.596231	0.49471	-5.66415
x00407			unannotated	0.0785948	-0.0628859	0.220075	24.3553	1.14169	0.263954	0.596231	0.497323	-5.67072
x01013			unannotated	0.304823	-0.24402	0.853666	21.0594	1.14167	0.264004	0.596231	0.497323	-5.6707
x01251			unannotated	0.123341	-0.0992011	0.345883	20.8703	1.13901	0.265041	0.596231	0.497454	-5.67365
x01054	Fluorodopa		3	0.372983	-0.30021	1.04618	20.3482	1.13892	0.265132	0.596231	0.497454	-5.67371
x01098	(2R)-2,3-Dihydroxypropyl 2-(palmitoylamino)ethyl phosphate		3	-0.696689	-1.96433	0.570957	19.2222	-1.12975	0.268905	0.600861	0.502527	-5.68364
x00105			unannotated	0.0397875	-0.0328687	0.112444	27.4827	1.12539	0.270659	0.600861	0.5048	-5.68838
x00744			unannotated	-0.201985	-0.571481	0.16751	19.2699	-1.12347	0.27147	0.600861	0.505311	-5.69045
sl00068	3-Methyl-2-oxovaleric acid	HMDB0000491	2a	-0.197142	-0.558465	0.16418	25.167	-1.12157	0.272305	0.600861	0.505863	-5.69245
x01206			unannotated	-0.41903	-1.19398	0.355919	20.2466	-1.11151	0.27653	0.604757	0.512699	-5.7032
x00624	Thiomorpholine		3	-0.0655147	-0.187156	0.0561271	23.384	-1.10685	0.278453	0.604757	0.513618	-5.7082
x00349			unannotated	0.0650138	-0.0557526	0.18578	24.7834	1.10634	0.278665	0.604757	0.513618	-5.70873
x00771	[Similar to: Methyl 2-[2,6-dioxo-4-(3,4,5-trimethoxyphenyl)piperidino]-4,5-dimethoxybenzoate; ΔMass: -205.2150 Da]		unannotated	-0.145863	-0.417572	0.125845	22.1572	-1.10353	0.279914	0.604757	0.51381	-5.71167
x00610			unannotated	0.0588278	-0.0508762	0.168532	23.4933	1.10202	0.280504	0.604757	0.51381	-5.71331
x00283	Urocanic acid	HMDB0000296	1	0.399241	-0.35414	1.15262	23.9727	1.08934	0.286008	0.613807	0.516954	-5.72659
x00651	[Similar to: N-tetrahydrothiophen-3-yl-N'-(2,3,4-trichlorophenyl)urea; ΔMass: 27.9246 Da]		unannotated	0.0429203	-0.0400096	0.12585	23.3841	1.06361	0.297242	0.633249	0.532069	-5.75324
x01002			unannotated	0.0526693	-0.0492094	0.154548	21.962	1.06244	0.297762	0.633249	0.532069	-5.75443
x00962	[Similar to: 1-(4-methoxyphenyl)propane-1,2-diol; ΔMass: -93.0789 Da]		unannotated	-0.0604526	-0.177832	0.0569264	21.9871	-1.05841	0.299559	0.633343	0.533306	-5.75854
x00385	Allantoin	HMDB0000462	1	-0.0662495	-0.195188	0.0626891	24.2169	-1.05592	0.300676	0.633343	0.534283	-5.76108
x00627	[Similar to: N-tetrahydrothiophen-3-yl-N'-(2,3,4-trichlorophenyl)urea; ΔMass: 5.9426 Da]		unannotated	0.0412097	-0.0391938	0.121613	23.5079	1.05331	0.301848	0.633343	0.535354	-5.76373
x01058			unannotated	0.0688435	-0.0684078	0.206095	21.7986	1.03081	0.312084	0.651909	0.551427	-5.78631
sl00194	Glycine	HMDB0000123	2a	0.0800486	-0.0805647	0.240662	21.8917	1.02424	0.315115	0.655327	0.552986	-5.79281
sl00219	Valine	HMDB0000883	1	0.0928834	-0.0951824	0.280949	29.2351	1.01524	0.319353	0.659973	0.55628	-5.80162
x00073			unannotated	0.0351442	-0.0361239	0.106412	28.1234	1.01342	0.320157	0.659973	0.55628	-5.80345
sl00184	Betaine	HMDB0000043	1	0.0714545	-0.0751921	0.218101	30.6222	1.00151	0.3258	0.662504	0.560901	-5.81502
x00846	4-Methoxyaniline		3	-0.127647	-0.390596	0.135302	22.4227	-0.997888	0.327539	0.662504	0.561355	-5.8185
sl00229	2-Methylbutyrylglycine	HMDB0000339	2a	0.100509	-0.106598	0.307617	20.4893	0.997338	0.327753	0.662504	0.561355	-5.81907
x00884			unannotated	0.0482555	-0.0512001	0.147711	22.4922	0.997123	0.327855	0.662504	0.561355	-5.81928
x00961	indoline-2-carboxylic acid		2b	-0.358302	-1.10301	0.386401	21.1221	-0.989027	0.331773	0.662504	0.565465	-5.82701
sl00038	Succinic acid	HMDB0000254	2a	-0.130961	-0.40327	0.141347	22.6399	-0.988606	0.331975	0.662504	0.565465	-5.82741
x00976			unannotated	-0.407155	-1.25548	0.441174	20.5117	-0.98852	0.332378	0.662504	0.565465	-5.82707
x00765			unannotated	0.0467903	-0.0506267	0.144207	22.9053	0.98708	0.332662	0.662504	0.565465	-5.82892
x00485	7-ketodeoxycholic acid		3	-0.482923	-1.4984	0.53255	21.0946	-0.977579	0.337299	0.665036	0.570713	-5.8379
x00806	2-(1-Naphthyl)-2-oxoethyl thiocyanate		3	-0.115395	-0.358276	0.127486	21.9958	-0.976645	0.337753	0.665036	0.570713	-5.83878
x00224	Butylated hydroxytoluene		3	0.131113	-0.145097	0.407324	25.3211	0.975771	0.338178	0.665036	0.570713	-5.83961
x01075	Benserazide		3	0.143893	-0.162857	0.450644	21.4807	0.964267	0.343803	0.673282	0.578127	-5.85042
x00036	[Similar to: Udenafil; ΔMass: -314.2066 Da]		unannotated	-0.0588705	-0.184824	0.0670833	29.129	-0.960544	0.345591	0.673975	0.579065	-5.85394
x00668			unannotated	-0.0583155	-0.1856	0.0689691	23.335	-0.941541	0.355057	0.689212	0.591761	-5.87146
x00510	10-HDA		2b	0.248995	-0.296044	0.794035	21.0487	0.939085	0.356337	0.689212	0.592844	-5.87366
x01175			unannotated	-0.0916095	-0.292794	0.109575	21.3541	-0.935787	0.357957	0.689507	0.593438	-5.87671
x01139			unannotated	0.421399	-0.511164	1.35396	19.8917	0.928876	0.361505	0.691651	0.597664	-5.88292
x00486	4-Phenolsulfonic acid		2b	0.316888	-0.386984	1.02076	22.4318	0.925453	0.363248	0.691651	0.597664	-5.886
x00489	2-Hydroxyquinoline		2b	0.257614	-0.314914	0.830142	22.7657	0.924943	0.363508	0.691651	0.597664	-5.88646
x00987			unannotated	-0.0693	-0.223762	0.085162	22.1037	-0.922025	0.364956	0.691651	0.597664	-5.88913
x00582			unannotated	0.0366139	-0.0453833	0.118611	23.719	0.917651	0.367199	0.69208	0.599249	-5.89304
x01030			unannotated	0.0557447	-0.0693423	0.180832	21.9547	0.915846	0.368128	0.69208	0.599723	-5.89464
x00653	HIL		3	0.137547	-0.172569	0.447664	22.7492	0.911735	0.370292	0.693375	0.601165	-5.89825
x00265			unannotated	0.062084	-0.0791733	0.203341	25.5249	0.903283	0.374642	0.696388	0.606493	-5.90575
x00141			unannotated	0.032852	-0.0419276	0.107632	26.9129	0.902839	0.374864	0.696388	0.606493	-5.90615
x00935			unannotated	0.0654202	-0.0840208	0.214861	22.1295	0.899649	0.376528	0.696726	0.607095	-5.90895
x01045	[Similar to: (3beta,5xi,9xi)-3-[(6-Deoxy-beta-D-glucopyranosyl)oxy]urs-12-ene-27,28-dioic acid; ΔMass: -277.1566 Da]		unannotated	0.183581	-0.241279	0.60844	20.6629	0.888227	0.38257	0.703477	0.61578	-5.91885
x00536			unannotated	-0.382317	-1.27117	0.506535	22.1121	-0.885899	0.384122	0.703477	0.617043	-5.92045
x00831	[Similar to: N-[2-(1,5-dimethyl-4-nitro-1H-pyrazol-3-yl)vinyl]-N,N-dimethylamine; ΔMass: -42.9694 Da]		unannotated	-0.101059	-0.335987	0.13387	22.5089	-0.88426	0.384667	0.703477	0.617043	-5.92227
x01396	[Similar to: 4-{[2-(4-fluorophenyl)-2-oxoethyl]amino}-4-oxobutanoic acid; ΔMass: 11.9292 Da]		unannotated	-0.159753	-0.536739	0.217233	19.6831	-0.871	0.391715	0.713589	0.627277	-5.93364
sl00290	N-Acetyl-aspartic acid	HMDB0000812	2a	-0.300249	-1.01374	0.413247	19.445	-0.865032	0.394939	0.716685	0.630294	-5.93867
sl00039	Taurine	HMDB0000251	1	0.0833432	-0.117049	0.283736	25.2514	0.854931	0.400406	0.721233	0.635779	-5.94715
x00733	Carbaryl		3	0.228706	-0.322114	0.779526	21.8972	0.853513	0.401177	0.721233	0.635929	-5.94833
x00358	indoline-2-carboxylic acid		2b	0.190027	-0.268498	0.648551	24.0278	0.851912	0.402049	0.721233	0.636239	-5.94967
x01234	N-(4,5-dimethyl-2-thiazolyl)cyclohexanecarboxamide		3	0.228597	-0.332486	0.789681	20.4883	0.837501	0.40995	0.732611	0.645483	-5.96156
sl00232	2-Picolinic acid	HMDB0002243	2a	0.102144	-0.14941	0.353699	21.2698	0.834665	0.411512	0.732617	0.646859	-5.96388
sl00128	Lactic acid	HMDB0000190	1	0.11376	-0.167721	0.39524	31.9057	0.830771	0.413674	0.733685	0.649171	-5.96705
x00336	Ornithine	HMDB0000214	1	-0.104454	-0.365667	0.156758	21.9139	-0.822005	0.418555	0.739083	0.654714	-5.97414
x01254	PFPeA		3	-0.0536556	-0.188589	0.0812774	20.9103	-0.817199	0.421208	0.739083	0.655904	-5.97803
x00129			unannotated	0.0355369	-0.053879	0.124953	27.091	0.816762	0.421453	0.739083	0.655904	-5.97838
x00322			unannotated	0.0292716	-0.0446828	0.103226	25.0937	0.813417	0.423334	0.739083	0.656423	-5.98105
sl00289	N8-Acetylspermidine	HMDB0002189	2a	-0.152032	-0.537188	0.233123	18.742	-0.811205	0.42458	0.739083	0.656423	-5.98281
x01419			unannotated	0.0661589	-0.103289	0.235606	19.672	0.802387	0.429571	0.73992	0.659267	-5.98978
x01016	Ethyl L-methioninate		3	-0.151469	-0.539905	0.236966	21.0442	-0.801582	0.430067	0.73992	0.659267	-5.99037
x00697	N-((4-AMINO-2-METHYL-5-PYRIMIDINYL)METHYL)FORMAMIDE		3	0.276915	-0.434057	0.987887	21.9103	0.800637	0.430604	0.73992	0.659267	-5.99111
x00842	N-Acetylhistamine		2b	-0.131879	-0.47316	0.209403	21.9465	-0.794335	0.434197	0.73992	0.661407	-5.99604
x00631	[Similar to: 14,15-Leukotriene E4; ΔMass: -279.3311 Da]		unannotated	-0.079397	-0.285475	0.126681	23.2601	-0.791981	0.435545	0.73992	0.661407	-5.99787
x01189	[Similar to: 2,3-dimethoxy-5-(6,7,8-trimethoxy-3,4-dihydro-2H-1-benzopyran-3-yl)cyclohexa-2,5-diene-1,4-dione; ΔMass: -258.1514 Da]		unannotated	-0.0983462	-0.353802	0.157109	20.8699	-0.791242	0.435943	0.73992	0.661407	-5.99847
x01267			unannotated	0.0589933	-0.0947044	0.212691	20.8933	0.788799	0.437332	0.73992	0.661407	-6.00037
sl00223	Indole-3-carboxyaldehyde	HMDB0029737	1	-0.265135	-0.956512	0.426243	23.0941	-0.788303	0.437655	0.73992	0.661407	-6.00072
x01179	2-Phenylcyclopropanamine		3	-0.0798207	-0.293193	0.133551	21.298	-0.768832	0.448898	0.747448	0.673449	-6.01562
x00863	1-octadecanoyl-2-(7Z,10Z,13Z,16Z-docosatetraenoyl)-sn-glycero-3-phosphocholine		3	-0.34555	-1.2716	0.580499	20.8248	-0.76854	0.449372	0.747448	0.673449	-6.01544
x00074			unannotated	-0.0524664	-0.192961	0.0880285	27.753	-0.767527	0.449666	0.747448	0.673449	-6.0166
x01413			unannotated	0.0643737	-0.108724	0.237472	20.0997	0.764272	0.451556	0.747448	0.674203	-6.01906
x00912	[Similar to: DL-Carnitine; ΔMass: 117.0790 Da]		unannotated	0.122097	-0.20686	0.451054	21.893	0.762971	0.452354	0.747448	0.674203	-6.02
sl00301	Prostaglandin E2	HMDB0001220	2a	0.189058	-0.320549	0.698665	18.616	0.762583	0.452577	0.747448	0.674203	-6.02029
x00896	S-methyl D-thioglycerate		3	0.17375	-0.297867	0.645368	21.5539	0.757318	0.455675	0.747448	0.67716	-6.02422
sl00266	Hexose		2a	-0.0455838	-0.169854	0.078686	28.9483	-0.753834	0.457692	0.747448	0.67716	-6.02684
x01086			unannotated	0.0581497	-0.100461	0.216761	21.6887	0.753433	0.457929	0.747448	0.67716	-6.02714
x00209			unannotated	0.032265	-0.0559313	0.120461	25.9755	0.751817	0.458884	0.747448	0.67716	-6.02833
x00739	[Similar to: N1-bicyclo[2.2.1]hept-5-en-2-yl-2-(5-fluoro-2-oxo-2,3-dihydro-1H-indol-3-yliden)hydrazine-1-carbothioamide; ΔMass: -98.2024 Da]		unannotated	-0.0506827	-0.189467	0.088102	23.0089	-0.750498	0.459664	0.747448	0.677248	-6.02931
x01041			unannotated	0.0689819	-0.120814	0.258778	18.9031	0.746931	0.461778	0.747448	0.679298	-6.03193
x00014	(2E)-3-[3-(Trifluoromethyl)phenyl]acrylic acid		3	-0.0429412	-0.161634	0.0757518	30.3816	-0.743498	0.463817	0.747448	0.680982	-6.03445
x01125	N'-[(3-nitro-6-oxo-1-cyclohexa-2,4-dienylidene)methyl]-1H-indole-3-carbohydrazide		3	-0.0777918	-0.293097	0.137513	21.4139	-0.742585	0.464372	0.747448	0.680982	-6.0351
x00277			unannotated	-0.0370067	-0.140858	0.066845	25.4252	-0.732315	0.470498	0.754724	0.686713	-6.04256
x00356	4-ethylphenylsulfonic acid		3	0.251266	-0.457885	0.960417	23.5384	0.728346	0.472917	0.756024	0.687082	-6.04538
x01328	4-(Diethylamino)salicylaldehyde		2b	-0.170491	-0.654878	0.313896	19.3508	-0.723521	0.475825	0.758094	0.690005	-6.04882
x01044			unannotated	0.0371149	-0.0690763	0.143306	21.9509	0.718275	0.478965	0.759546	0.691979	-6.05258
x00291			unannotated	0.0431835	-0.080656	0.167023	25.1596	0.716621	0.479969	0.759546	0.691979	-6.05375
sl00091	Cholic acid	HMDB0000619	1	-0.218252	-0.847387	0.410884	22.0179	-0.713108	0.482137	0.760417	0.69404	-6.05619
x00136	N,N,4-Trimethylaniline		2b	-0.0718584	-0.283168	0.139451	26.7038	-0.699038	0.49074	0.767494	0.702793	-6.06598
x01173	N(4)-phosphoagmatine		3	-0.0890623	-0.35191	0.173786	21.1458	-0.696509	0.492294	0.767494	0.703278	-6.06772
x00041	2,4-Xylidine		2b	0.0770823	-0.151042	0.305207	28.9353	0.694584	0.493482	0.767494	0.703905	-6.06904
x01379			unannotated	-0.0702817	-0.280077	0.139514	20.5193	-0.688458	0.497235	0.767494	0.70614	-6.07325
x00215			unannotated	0.0236997	-0.0470547	0.094454	25.9356	0.688367	0.497291	0.767494	0.70614	-6.07331
x00309	Uridine	HMDB0000296	2a	-0.0662507	-0.264061	0.131559	21.3608	-0.688293	0.497338	0.767494	0.70614	-6.07336
x01274			unannotated	0.047252	-0.0940695	0.188574	21.1401	0.687136	0.498054	0.767494	0.70614	-6.07414
x01255			unannotated	0.0398315	-0.0816482	0.161311	21.2125	0.673835	0.506337	0.775722	0.711948	-6.08307
x00228	[Similar to: 3-[4,8,11-tri(2-cyanoethyl)-1,4,8,11-tetraazacyclotetradecanyl]propanenitrile; ΔMass: -259.1797 Da]		unannotated	-0.0720372	-0.291966	0.147891	25.6637	-0.673313	0.506695	0.775722	0.711948	-6.08339
x00792	[Similar to: Chlorhexidine; ΔMass: -380.1031 Da]		unannotated	-0.0769335	-0.313314	0.159447	22.6688	-0.66903	0.509379	0.777299	0.714651	-6.08623
x01102	[Similar to: N-(2-hydroxyethyl)-N'-propylthiourea; ΔMass: -0.1400 Da]		unannotated	0.0495834	-0.104315	0.203482	21.568	0.662113	0.5137	0.780567	0.718568	-6.0908
x00837	[Similar to: 2-(5-chloro-3-methyl-1-benzothiophen-2-yl)acetohydrazide; ΔMass: 7.9583 Da]		unannotated	-0.0347626	-0.143515	0.0739897	22.5445	-0.656909	0.516988	0.780567	0.721698	-6.09419
x00338	Benserazide		3	-0.0390232	-0.161247	0.0832009	24.742	-0.656142	0.517473	0.780567	0.721698	-6.09469
x00818	[Similar to: N-(3-methylphenyl)-2-(3-pyridinyl)-1-pyrrolidinecarboxamide; ΔMass: -174.0943 Da]		unannotated	0.119333	-0.255338	0.494004	21.9438	0.654715	0.518407	0.780567	0.721929	-6.09558
x00351	2-Amino-4-methylpyrimidine		2b	0.0325671	-0.070327	0.135461	24.7865	0.650459	0.521078	0.780567	0.724576	-6.09836
sl00095	Daidzein	HMDB0003312	2a	-0.252405	-1.05341	0.548604	17.7199	-0.647742	0.522836	0.780567	0.724875	-6.10007
x00147			unannotated	-0.217418	-0.910026	0.475189	24.953	-0.645285	0.524402	0.780567	0.725976	-6.10164
x00877	N,N-Dimethyl-N-phenylurea		3	0.0839423	-0.184	0.351884	22.3882	0.643995	0.525224	0.780567	0.726046	-6.10246
sl00215	Thiamine	HMDB0000235	1	0.0549143	-0.121626	0.231455	23.5087	0.639406	0.528156	0.780567	0.729026	-6.10537
sl00202	Methionine	HMDB0000696	1	-0.0353274	-0.149198	0.0785427	28.1152	-0.637577	0.5293	0.780567	0.729534	-6.10656
sl00127	Kynurenine	HMDB0000684	2a	-0.186457	-0.789805	0.41689	18.5104	-0.635264	0.530813	0.780567	0.730548	-6.10798
x00924	convicine		3	0.0682522	-0.152989	0.289493	18.7986	0.633989	0.531603	0.780567	0.730565	-6.10881
x00493	(8S,9S)-6-[(2R)-1-hydroxypropan-2-yl]-8-methyl-9-[[methyl(pyridin-4-ylmethyl)amino]methyl]-10-oxa-1,6,14,15-tetrazabicyclo[10.3.0]pentadeca-12,14-dien-5-one		3	-0.200332	-0.852244	0.451581	22.2816	-0.631688	0.533111	0.780567	0.731568	-6.11022
x01418	validamine 7-phosphate		3	0.10254	-0.234494	0.439574	18.903	0.625247	0.537235	0.784162	0.735081	-6.11426
sl00085	Arginine	HMDB0000517	1	-0.0606959	-0.262687	0.141295	23.6185	-0.617689	0.542158	0.788899	0.739664	-6.11888
x00285	(2S,6S)-2-Ammonio-6-[(3-carboxylatopropanoyl)amino]heptanedioate		3	0.0527834	-0.126023	0.23159	20.8673	0.606659	0.549315	0.796147	0.745452	-6.12559
x01414	HOxAsH-bis(1,2-ethanedithiol)		3	0.044433	-0.10685	0.195716	20.1984	0.603598	0.551319	0.796147	0.746743	-6.12742
x01288	[Similar to: 1,3-dimethyl-5-(morpholinosulfonyl)indolin-2-one; ΔMass: -67.0786 Da]		unannotated	0.435194	-1.0606	1.93098	19.0341	0.598073	0.55497	0.796147	0.749315	-6.13068
x00431	Levulinic acid		3	-0.0768334	-0.34096	0.187293	24.1274	-0.597971	0.555037	0.796147	0.749315	-6.13074
x00996	[Similar to: 5-[(4-Methylbenzyl)thio]-1,3,4-thiadiazol-2-amine; ΔMass: 55.9613 Da]		unannotated	0.0713543	-0.174295	0.317003	21.8089	0.597101	0.555609	0.796147	0.749315	-6.13126
x00004	Carnitine	HMDB0000062	1	0.0382868	-0.0946114	0.171185	30.7313	0.592087	0.55889	0.797034	0.75266	-6.13424
x00851	carboxynorspermidine		3	-0.0711141	-0.318835	0.176606	22.4071	-0.590114	0.560213	0.797034	0.752715	-6.13537
sl00001	2-(hydroxymethyl)butanoic/2-Ethylhydracrylic acid		2a	0.0858532	-0.214375	0.386082	21.7236	0.587823	0.561727	0.797034	0.752715	-6.13671
x00328	2,2,6,6-Tetramethyl-4-piperidinol		2b	0.315702	-0.791966	1.42337	22.1246	0.585881	0.563011	0.797034	0.752818	-6.13784
x01343	1-O-Arsonopentofuranose		3	-0.120402	-0.549591	0.308787	20.3407	-0.576672	0.569125	0.803269	0.758833	-6.14314
x00247			unannotated	0.0398532	-0.103277	0.182983	25.6924	0.572268	0.572043	0.804458	0.760332	-6.14567
x00372	acetylspermine		3	0.0453684	-0.118348	0.209084	18.0416	0.5695	0.573884	0.804458	0.760332	-6.14725
x00801	[Similar to: 1-[(2-chlorophenyl)sulfonyl]-3-methyl-4-(2-methylallyl)-4,5-dihydro-1H-pyrazol-5-one; ΔMass: 34.1480 Da]		unannotated	0.245584	-0.643638	1.13481	20.0309	0.567716	0.575102	0.804458	0.760332	-6.14823
sl00190	Cytidine	HMDB0000089	1	-0.0512282	-0.23991	0.137453	24.7898	-0.558113	0.581546	0.808026	0.766695	-6.15359
sl00147	Serine	HMDB0000187	1	-0.046268	-0.21806	0.125524	22.8541	-0.553535	0.584614	0.808026	0.768444	-6.15613
x00675			unannotated	-0.036198	-0.170847	0.0984509	23.2663	-0.552475	0.585321	0.808026	0.768444	-6.15672
x00641			unannotated	0.0682291	-0.186607	0.323065	18.997	0.550224	0.586842	0.808026	0.768444	-6.15796
sl00247	5-Methylcytosine	HMDB0002894	2a	0.125998	-0.345882	0.597877	20.308	0.548876	0.587778	0.808026	0.768444	-6.15867
x00666			unannotated	0.0397311	-0.109713	0.189176	23.2819	0.546364	0.589454	0.808026	0.768801	-6.16006
x00963			unannotated	-0.0563937	-0.26867	0.155883	22.0819	-0.546041	0.589687	0.808026	0.768801	-6.16022
x00408			unannotated	0.0491298	-0.137514	0.235774	24.3757	0.541095	0.593052	0.810275	0.77105	-6.16288
sl00273	Hexanoyl Glycine	HMDB0000701	2a	0.094478	-0.270121	0.459077	21.4058	0.532669	0.59879	0.815743	0.77472	-6.16737
x00127			unannotated	0.0216774	-0.0654247	0.108779	27.1373	0.511457	0.613329	0.830257	0.788685	-6.1784
x00774			unannotated	-0.066013	-0.333325	0.201299	22.6132	-0.507637	0.615991	0.830257	0.790721	-6.18031
x00835	1,2-Cyclohexanediamine		3	-0.0574075	-0.290754	0.175939	22.4697	-0.505719	0.617319	0.830257	0.790721	-6.18128
x00720			unannotated	-0.0310449	-0.157503	0.095413	23.0663	-0.504517	0.618129	0.830257	0.790721	-6.18191
x01024	[Similar to: 2-[2-(2-propynylsulfanyl)phenyl]-1,4,5,6-tetrahydropyrimidine hydrobromide; ΔMass: 86.1485 Da]		unannotated	0.218405	-0.67179	1.1086	19.9221	0.504336	0.618277	0.830257	0.790721	-6.18198
x00634	[Similar to: N1-bicyclo[2.2.1]hept-5-en-2-yl-2-(5-fluoro-2-oxo-2,3-dihydro-1H-indol-3-yliden)hydrazine-1-carbothioamide; ΔMass: -120.1842 Da]		unannotated	-0.0258494	-0.133376	0.0816777	23.4103	-0.494041	0.625407	0.833022	0.796589	-6.18711
sl00003	2-Oxoglutaric acid	HMDB0000208	2a	0.0749748	-0.239703	0.389653	22.7854	0.489769	0.628408	0.833022	0.798533	-6.18918
sl00166	a/b/ω-Muricholic acid		2a	-0.212342	-1.10769	0.683009	17.8955	-0.488464	0.629482	0.833022	0.798533	-6.18697
x01349	[Similar to: Benthiavalicarb isopropyl; ΔMass: -50.1678 Da]		unannotated	0.0830749	-0.268999	0.435148	19.9335	0.484964	0.631753	0.833022	0.799329	-6.19152
x00143	[Similar to: Acetyl-L-carnitine; ΔMass: 14.0202 Da]		unannotated	0.0566315	-0.185676	0.298939	26.0701	0.480434	0.63494	0.833022	0.800238	-6.19369
x00638	triazacyclononane		3	-0.0549251	-0.290637	0.180786	23.1175	-0.478996	0.635949	0.833022	0.800238	-6.19437
x00461			unannotated	-0.0555571	-0.294709	0.183595	23.7976	-0.477538	0.636973	0.833022	0.800238	-6.19507
x00240	BAP		3	-0.0388881	-0.206728	0.128952	25.523	-0.476281	0.637856	0.833022	0.800238	-6.19567
x00087	5',6'-Diamino-1,3'-bis(2-deoxy-beta-D-erythro-pentofuranosyl)-4',5'-dihydro-4,4'-bipyrimidine-2,2'(1H,3'H)-dione		3	-0.0241439	-0.128525	0.0802372	27.643	-0.475353	0.638487	0.833022	0.800238	-6.19613
sl00310	Testosterone	HMDB0000234	2a	0.123025	-0.410366	0.656416	19.6563	0.474121	0.639374	0.833022	0.800282	-6.19669
x01052	2-[3-carboxylato-3-(methylammonio)propyl]-L-histidine dizwitterion		3	-0.0741088	-0.397941	0.249723	21.5323	-0.470427	0.641976	0.833022	0.801527	-6.19843
x01146	1,2,3,4,6,7,8-Heptachlorodibenzofuran		3	0.030223	-0.101856	0.162302	21.5466	0.470258	0.642074	0.833022	0.801527	-6.19852
sl00197	Isoleucine	HMDB0000172	1	-0.0323056	-0.174242	0.109631	28.678	-0.467796	0.643819	0.833022	0.80217	-6.19967
x01124	Allantoic acid		3	-0.0537822	-0.291031	0.183466	21.1149	-0.46591	0.645149	0.833022	0.80217	-6.20055
x00757			unannotated	0.0288279	-0.100138	0.157794	22.8636	0.459377	0.649765	0.834797	0.806163	-6.20356
sl00156	Tauroursodeoxycholic acid	HMDB0000874	2a	0.247359	-0.86051	1.35523	18.8135	0.458966	0.650076	0.834797	0.806163	-6.20373
sl00153	Taurochenodeoxycholic acid	HMDB0000951	2a	-0.179786	-1.02328	0.663709	18.2447	-0.438143	0.664905	0.851513	0.818077	-6.21304
x01335			unannotated	0.0535763	-0.202755	0.309908	20.2626	0.429538	0.671055	0.85654	0.821289	-6.21678
sl00045	Uric acid	HMDB0000289	1	-0.0362693	-0.210633	0.138095	24.6288	-0.427587	0.672475	0.85654	0.821289	-6.2176
x01122	2-Acetylphenanthrene		3	-0.0523728	-0.306531	0.201785	21.1091	-0.423564	0.675366	0.856572	0.821289	-6.21931
sl00138	N-Acetyl-tyrosine	HMDB0000866	2a	-0.0930057	-0.545435	0.359424	17.9676	-0.422464	0.676145	0.856572	0.821289	-6.21979
x00581	2-Ammonio-3-(3-oxo-1-propen-1-yl)-2-butenedioate		3	-0.0363648	-0.216113	0.143384	23.5641	-0.41587	0.680921	0.859596	0.825891	-6.22253
x01400	delta-guanidinovaleric acid		3	-0.0751546	-0.448388	0.298079	19.4285	-0.413848	0.68237	0.859596	0.826582	-6.22338
x00594	3-Ureidopropionic acid	HMDB0000026	2a	-0.0564266	-0.338242	0.225389	22.8687	-0.411587	0.684019	0.859596	0.827513	-6.2243
x00717			unannotated	-0.0423379	-0.258967	0.174291	22.7312	-0.401748	0.691155	0.86263	0.835072	-6.22829
x00533	galegine		3	-0.0447904	-0.274676	0.185095	23.777	-0.400512	0.692054	0.86263	0.835085	-6.22879
x01197	3-hydroxy-cis-5-octenoylcarnitine		3	-0.0796305	-0.489638	0.330377	20.4246	-0.399236	0.692983	0.86263	0.835133	-6.2293
x00114	[Similar to: 2-(3,4-dihydroisoquinolin-1-yl)-N-propylhydrazine-1-carboxamide; ΔMass: -58.0989 Da]		unannotated	-0.0428102	-0.263925	0.178305	26.9784	-0.397988	0.693891	0.86263	0.835157	-6.22979
x01184	Methyl Yellow		3	0.0625741	-0.262551	0.387699	20.8074	0.395628	0.69561	0.86263	0.836156	-6.23073
x00254			unannotated	-0.0285869	-0.179158	0.121984	25.6221	-0.39021	0.699552	0.864008	0.836615	-6.23286
x00538			unannotated	0.0296421	-0.127437	0.186721	23.8517	0.387849	0.701277	0.864008	0.837612	-6.23378
x00163	Methyl Î²-D-glucuronide		3	-0.0414469	-0.261854	0.178961	26.5562	-0.386552	0.702236	0.864008	0.837693	-6.23427
sl00141	Pyruvic acid	HMDB0000243	2a	-0.0504635	-0.320743	0.219816	25.259	-0.383801	0.704249	0.864222	0.837967	-6.23533
x01225	[Similar to: L-Ergothioneine; ΔMass: -16.9857 Da]		unannotated	-0.0368202	-0.23797	0.164329	21.0706	-0.376182	0.709821	0.868134	0.841402	-6.23824
x00646	7-Chloroemodin		3	-0.0754507	-0.491431	0.340529	22.4381	-0.372849	0.712286	0.868134	0.843018	-6.23947
x00027	N,N′-diisopropylcarbodiimide		3	-0.0369082	-0.240908	0.167092	29.3665	-0.371907	0.712978	0.868134	0.843018	-6.23982
sl00054	2′-Deoxycytidine	HMDB0000014	1	0.0363486	-0.16598	0.238678	20.7061	0.369199	0.714956	0.868293	0.844295	-6.24084
x01357	Kynurenic acid	HMDB0000715	2a	0.155415	-0.731177	1.04201	19.2459	0.360339	0.721507	0.873991	0.846713	-6.24406
x01384			unannotated	-0.0527629	-0.357244	0.251718	20.1981	-0.356133	0.724604	0.874018	0.847636	-6.24557
sl00090	Carnosine	HMDB0000033	2a	-0.223724	-1.52014	1.07269	18.1105	-0.355434	0.725249	0.874018	0.847636	-6.23717
x01232			unannotated	0.0233821	-0.113671	0.160435	21.3643	0.35061	0.728693	0.875708	0.849841	-6.24752
sl00016	Glutamic acid	HMDB0000148	1	-0.0273542	-0.19179	0.137082	23.9045	-0.341941	0.735144	0.875708	0.855242	-6.25052
x01361	p-Cresol		3	-0.0884768	-0.624677	0.447723	20.0857	-0.339854	0.736808	0.875708	0.855462	-6.2133
x01248	(2S)-2-amino-N'-[(4-methyl-2,6-dioxo-5-pyrimidinylidene)methyl]-3-phenylpropanehydrazide		3	-0.0840353	-0.597293	0.429223	20.4655	-0.336564	0.739149	0.875708	0.85672	-6.25234
x01257			unannotated	-0.0330391	-0.236333	0.170255	21.1049	-0.333991	0.741054	0.875708	0.85787	-6.25321
x00348			unannotated	-0.0345029	-0.248734	0.179728	24.4672	-0.331067	0.743249	0.875708	0.859066	-6.25418
sl00108	Glycocholic acid	HMDB0000138	2a	0.152128	-0.794991	1.09925	17.9045	0.330176	0.743915	0.875708	0.859066	-6.25447
x00078	Histidine	HMDB0000177	1	-0.039813	-0.293196	0.21357	23.8519	-0.322991	0.749288	0.875708	0.861435	-6.25682
x01235	3-(1-hydroxyethyl)-2,3,6,7,8,8a-hexahydropyrrolo[1,2-a]pyrazine-1,4-dione		2b	-0.0594076	-0.438025	0.31921	20.5642	-0.32254	0.749626	0.875708	0.861435	-6.25696
x01377			unannotated	-0.0261059	-0.192754	0.140542	20.3453	-0.321936	0.750064	0.875708	0.861435	-6.25717
x01372	2,2'-({2-[(Carboxylatomethyl)amino]ethyl}ammonio)diacetate		3	-0.041268	-0.305688	0.223152	20.1995	-0.320738	0.750962	0.875708	0.861435	-6.25755
x00053	Proline	HMDB0000162	1	0.03215	-0.177214	0.241514	28.3272	0.315662	0.754781	0.875708	0.861435	-6.25916
sl00176	4-Guanidinobutyric acid	HMDB0003464	1	-0.0396838	-0.298122	0.218755	26.4855	-0.315644	0.754795	0.875708	0.861435	-6.25917
x00643	(4aS,10aS)-4a,7-Dimethyl-3,4,4a,9,10,10a-hexahydro-2(1H)-phenanthrenone		3	0.053565	-0.301845	0.408975	22.8736	0.309808	0.759179	0.875708	0.86212	-6.26099
x00219	Deanol		3	0.0320686	-0.181283	0.24542	25.3419	0.308977	0.759804	0.875708	0.86212	-6.26125
sl00157	Thymidine	HMDB0000273	2a	0.0297746	-0.170341	0.22989	18.6723	0.305771	0.762203	0.875708	0.86212	-6.26224
x01356	capuride		3	0.0704697	-0.403598	0.544538	19.8669	0.305565	0.762371	0.875708	0.86212	-6.2623
x00630	Ethyl lactate		3	0.0304394	-0.174568	0.235447	22.6492	0.305217	0.762633	0.875708	0.86212	-6.26241
x01141	1-(2,1,3-benzoxadiazol-4-yloxy)-3,3-dimethyl-1-(1,2,4-triazol-1-yl)-2-butanone		3	-0.230568	-1.78418	1.32304	18.4563	-0.305069	0.762744	0.875708	0.86212	-6.26245
x00413	4-(2-Methoxyphenoxy)-N-(3-pyridinyl)benzenesulfonamide		3	0.0257824	-0.1488	0.200364	21.8232	0.303497	0.763916	0.875708	0.86212	-6.26294
x01218			unannotated	0.0289155	-0.168696	0.226527	21.2823	0.300712	0.766015	0.875978	0.863374	-6.26378
x01337			unannotated	0.0178146	-0.10824	0.143869	20.7389	0.290435	0.773778	0.882707	0.865894	-6.26682
x01137	Glyphosate		3	-0.0645069	-0.533886	0.404872	20.9208	-0.282504	0.779796	0.88586	0.868493	-6.26909
x00229	Pyrrolidine		3	0.0314583	-0.198805	0.261721	25.223	0.280836	0.781061	0.88586	0.868873	-6.26956
x01333	5-Chlorooctyl acetate		3	-0.0392273	-0.330218	0.251763	20.1191	-0.277039	0.783931	0.88586	0.870171	-6.27063
x01107	[Similar to: 4-{[2-(4-fluorophenyl)-2-oxoethyl]amino}-4-oxobutanoic acid; ΔMass: -23.0869 Da]		unannotated	0.078356	-0.503421	0.660133	20.6226	0.276858	0.78408	0.88586	0.870171	-6.27067
x00426	[Similar to: ethyl 4-oxo-7-(trifluoromethyl)-4H-pyrido[1,2-a]pyrimidine-3-carboxylate; ΔMass: -96.0235 Da]		unannotated	-0.0147192	-0.127203	0.0977646	24.1812	-0.268921	0.790104	0.890524	0.873251	-6.27285
x00965	2-[[2-(3,5-dimethyl-1-pyrazolyl)-6-methyl-4-pyrimidinyl]amino]ethanol		3	-0.0581609	-0.511094	0.394772	21.5187	-0.26396	0.793893	0.892655	0.875892	-6.27417
x00331			unannotated	0.0206268	-0.152608	0.193862	24.9582	0.244758	0.808567	0.906984	0.886876	-6.27906
x01411			unannotated	0.0260967	-0.200263	0.252457	20.1103	0.236929	0.814561	0.910472	0.892409	-6.28096
sl00187	Choline	HMDB0000097	1	0.0137773	-0.108022	0.135576	29.4462	0.232462	0.817991	0.910472	0.894084	-6.28201
x01273	Menadione bisulfite		3	0.0675173	-0.537303	0.672337	20.3658	0.229473	0.820299	0.910472	0.894647	-6.28269
x01171	5-Methoxy-1H-indol-6-yl Î²-D-glucopyranosiduronic acid		3	-0.156988	-1.56566	1.25169	19.791	-0.229086	0.820596	0.910472	0.894647	-6.28278
sl00081	Anserine	HMDB0000194	2a	0.0984437	-0.788762	0.985649	19.791	0.22809	0.821362	0.910472	0.894647	-6.28301
x01292	2-Hydroxyisocaproic acid	HMDB0000746	2a	0.0404522	-0.344965	0.425869	20.2804	0.215751	0.830867	0.918841	0.901182	-6.28576
x00684	Nitrosoheptamethyleneimine		2b	0.0786197	-0.691879	0.849119	21.945	0.20975	0.835499	0.921795	0.903762	-6.28704
x00097	Serotonin	HMDB0000259	1	0.022544	-0.208926	0.254014	26.9614	0.200206	0.842878	0.925369	0.90942	-6.289
x00422			unannotated	-0.0822658	-0.936249	0.771717	21.8144	-0.198021	0.84457	0.925369	0.90942	-6.28944
x01018	Glyceric acid	HMDB0000139	1	-0.0270644	-0.308153	0.254024	21.6368	-0.197924	0.844645	0.925369	0.90942	-6.28946
x01115	Isatin		3	-0.0431188	-0.507836	0.421599	20.9037	-0.19073	0.85022	0.92931	0.912336	-6.29086
x00843	Cyclophosphamide		3	-0.0365372	-0.462802	0.389728	21.7495	-0.176197	0.861506	0.939461	0.9192	-6.29353
sl00143	Rhamnose	HMDB0000849	2a	-0.0468926	-0.605881	0.512095	20.7565	-0.172442	0.864426	0.940464	0.920247	-6.29419
sl00036	Pyroglutamic acid	HMDB0000267	2a	-0.0102934	-0.13894	0.118353	22.1908	-0.164433	0.870656	0.943148	0.924765	-6.29555
x00919	methyl 2,5-dimethyl-1H-pyrrole-3-carboxylate		2b	0.0151418	-0.177444	0.207727	22.27	0.161592	0.872873	0.943148	0.925072	-6.29601
sl00256	Creatinine	HMDB0000562	2a	-0.00817299	-0.112151	0.0958045	28.6437	-0.161537	0.872914	0.943148	0.925072	-6.29602
sl00165	α-aminobutyric acid	HMDB0000650	2a	-0.0158095	-0.224437	0.192818	18.9266	-0.155731	0.877442	0.945867	0.927779	-6.29695
x00568	1-Oxo-1,2,4-butanetricarboxylic acid		3	-0.00960101	-0.141433	0.122231	23.4702	-0.149667	0.882177	0.948794	0.930692	-6.29787
sl00122	Indole-3-carboxylate	HMDB0003320	2a	0.0434401	-0.586125	0.673005	18.5271	0.141838	0.888302	0.951526	0.935543	-6.29902
sl00151	Tauro-a/b-Muricholic acid		2a	0.0576115	-0.780842	0.896065	19.3388	0.141245	0.888766	0.951526	0.935543	-6.2991
x00907			unannotated	0.0104499	-0.154236	0.175136	22.3731	0.130403	0.897247	0.957798	0.943414	-6.30058
x00796			unannotated	0.0102307	-0.153328	0.173789	22.5055	0.128548	0.8987	0.957798	0.943886	-6.30082
x00173	[Similar to: N-(2-hydroxyethyl)-N'-propylthiourea; ΔMass: -3.1746 Da]		unannotated	0.0138862	-0.223586	0.251359	26.2385	0.120202	0.905248	0.962594	0.948643	-6.30186
x01342	2-Hydroxy-4-(methylthio)butanoic acid		3	0.0708827	-1.2733	1.41506	17.9506	0.108399	0.914512	0.97025	0.955157	-6.30322
x00079	[Similar to: N-(2,5-diethoxy-4-morpholinophenyl)acetamide; ΔMass: -140.1225 Da]		unannotated	0.00788318	-0.14731	0.163077	27.6876	0.104417	0.917641	0.971376	0.957028	-6.30364
x01154	Acetanilide		3	0.0107564	-0.216684	0.238196	21.3719	0.0972013	0.92331	0.975182	0.961142	-6.30438
sl00292	N-Acetyl-glycine	HMDB0000532	1	-0.00947408	-0.222298	0.20335	21.4915	-0.0914922	0.927801	0.977727	0.964749	-6.30492
x00404			unannotated	-0.00413744	-0.103559	0.0952837	24.5063	-0.0855233	0.932498	0.979607	0.968561	-6.30545
x01352	[Similar to: 4-{[2-(4-fluorophenyl)-2-oxoethyl]amino}-4-oxobutanoic acid; ΔMass: 25.9084 Da]		unannotated	-0.0373468	-1.01621	0.941521	19.4487	-0.078428	0.938089	0.979607	0.968674	-6.30603
x00803	Toxopyrimidine		3	0.0130981	-0.331101	0.357297	22.0062	0.078224	0.938249	0.979607	0.968674	-6.30605
x00619	[Similar to: N-{[(2R,4S,5R)-5-Ethyl-1-azabicyclo[2.2.2]oct-2-yl]methyl}-2-furamide; ΔMass: -96.0211 Da]		unannotated	-0.00736191	-0.209712	0.194988	23.3748	-0.0747876	0.940957	0.979607	0.969846	-6.30631
x01113			unannotated	0.00439507	-0.120177	0.128967	21.585	0.0725063	0.942751	0.979607	0.970011	-6.30648
sl00282	Isovalerylcarnitine	HMDB0000688	2a	0.0113244	-0.324294	0.346942	23.7639	0.0693605	0.945234	0.979607	0.970011	-6.3067
x01010			unannotated	-0.00823398	-0.255698	0.23923	21.8717	-0.0683974	0.945993	0.979607	0.970011	-6.30677
x00649	(2S)-5-(Carbamoylamino)-2-[(3-carboxylatopropanoyl)amino]pentanoate		3	0.00594789	-0.173688	0.185584	23.205	0.06806	0.946259	0.979607	0.970011	-6.30679
x00673	[Similar to: N-(3,5-dimethyl-4-isoxazolyl)-N'-{[1-(phenylsulfonyl)-4-piperidinyl]methyl}urea; ΔMass: -265.1273 Da]		unannotated	0.00451386	-0.144411	0.153439	23.2066	0.0622891	0.950807	0.979696	0.97197	-6.30717
x00677	Docosahexaenoic acid ethyl ester		2b	0.0332006	-1.07328	1.13968	20.644	0.0616798	0.95129	0.979696	0.97197	-6.30721
x00595	1,8-Diazabicyclo [5.4.0]undec-7-ene		2b	0.00589034	-0.197095	0.208876	23.4262	0.059651	0.95289	0.979696	0.972548	-6.30733
x00455	[Similar to: (2R,3S,4S,5R,6R)-2-({[(2R,3R,4R,5S)-3,4-dihydroxy-5-(hydroxymethyl)oxolan-2-yl]oxy}methyl)-6-{[(2E)-3,7-dimethylocta-2,6-dien-1-yl]oxy}oxane-3,4,5-triol; ΔMass: -258.1615 Da]		unannotated	-0.00394257	-0.145162	0.137276	24.0966	-0.0573769	0.954682	0.979696	0.97332	-6.30747
x01210			unannotated	0.0114444	-0.420642	0.443531	20.3299	0.054446	0.956996	0.979931	0.974623	-6.30763
x00423	[Similar to: 5-hydroxy-6,8-dimethoxy-7-{[(2S,3R,4S,5S,6R)-3,4,5-trihydroxy-6-(hydroxymethyl)oxan-2-yl]oxy}-2H-chromen-2-one; ΔMass: -217.0134 Da]		unannotated	-0.00310127	-0.136509	0.130306	24.2034	-0.0477738	0.96226	0.981405	0.978222	-6.30797
x00670	4-heptyl-3-methyl-1H-pyrazol-5-ol		2b	-0.00480919	-0.213678	0.204059	23.1401	-0.0473305	0.962612	0.981405	0.978222	-6.308
x01177	2-pentan-3-yl-1H-imidazole		3	-0.00333927	-0.201333	0.194655	21.3423	-0.0346602	0.972614	0.989456	0.986254	-6.30852
x00521	[Similar to: 6-[4-(3,4-dimethoxyphenyl)-hexahydrofuro[3,4-c]furan-1-yl]-4-methoxy-2H-1,3-benzodioxole; ΔMass: -140.1482 Da]		unannotated	-0.00151423	-0.104922	0.101893	23.721	-0.0300932	0.976222	0.990916	0.988845	-6.30867
sl00272	Guanidoacetic acid	HMDB0000128	2a	-0.00327117	-0.271103	0.264561	22.1734	-0.0251063	0.980162	0.990916	0.989852	-6.3088
x00778	6-Methylquinoline		2b	0.00240603	-0.196725	0.201537	22.751	0.0248373	0.980375	0.990916	0.989852	-6.30881
x00937			unannotated	-0.00176673	-0.179932	0.176399	22.2575	-0.0203787	0.983896	0.992342	0.992342	-6.30891
x00894	[Similar to: Perazine; ΔMass: -199.0456 Da]		unannotated	-0.0014221	-0.213643	0.210799	22.3804	-0.0137746	0.989115	0.993349	0.992729	-6.30903
x01376	3-hydroxy-cis-5-octenoylcarnitine		3	-0.00206034	-0.322621	0.318501	20.3553	-0.0132099	0.989561	0.993349	0.992729	-6.30903
x00527			unannotated	0.00235095	-0.433371	0.438073	23.1231	0.0110912	0.991235	0.993349	0.993349	-6.30906
x00593	1-(4-Nitrophenyl)ethanone		3	-0.0012277	-0.348873	0.346417	21.1503	-0.00725934	0.994263	0.994263	0.995322	-6.30909

## Sheet: sheet_3
compound_id	compound_name	hmdb_id	annotation_level	log_fc	ci_l	ci_r	ave_expr	t	p_value	adj_p_val	global_adj_p_val	b
x00355	4-Hydroxyproline	HMDB0000725	2a	-0.950653	-1.17191	-0.729397	24.163	-8.8322	2.65315e-09	1.1043e-06	2.2086e-06	11.4189
x00904	Ecgonine		2b	-1.24425	-1.54242	-0.946079	21.4142	-8.57803	4.69915e-09	1.1043e-06	2.2086e-06	10.8657
sl00310	Testosterone	HMDB0000234	2a	-1.66785	-2.21122	-1.12448	19.6563	-6.30959	1.11757e-06	0.000175086	0.000262629	5.53468
x00960	5-Hydroxytryptophol		3	-1.52495	-2.05616	-0.993737	20.1202	-5.90107	3.18942e-06	0.000374757	0.000599612	4.50955
sl00067	Indole-3-acrylic acid	HMDB0000734	2a	-0.895025	-1.22918	-0.560873	21.4157	-5.50596	8.91288e-06	0.000743934	0.00127532	3.50551
sl00169	N-Acetyl-ornithine	HMDB0003357	2a	-0.372345	-0.512105	-0.232585	20.3926	-5.47512	9.49703e-06	0.000743934	0.00127532	3.44119
x00548	3-Hydroxy-3-[(3-methylbutanoyl)oxy]-4-(trimethylammonio)butanoate		3	-0.555483	-0.76708	-0.343887	22.9548	-5.3964	1.18739e-05	0.000762721	0.00135595	3.22547
x00908	[Similar to: N1-[4-(tert-Butyl)phenyl]-2-[(1-methyl-1H-imidazol-2-yl)thio]acetamide; ΔMass: -123.0644 Da]		unannotated	-1.86855	-2.58485	-1.15226	20.7121	-5.36236	1.29825e-05	0.000762721	0.00135595	3.13835
x00796			unannotated	0.417665	0.251045	0.584284	22.5055	5.1515	2.22628e-05	0.00105583	0.00175971	2.61006
x00495	Histamine		2b	0.481036	0.289169	0.672903	23.7513	5.15371	2.24644e-05	0.00105583	0.00175971	2.60348
x00143	[Similar to: Acetyl-L-carnitine; ΔMass: 14.0202 Da]		unannotated	-0.605546	-0.852388	-0.358704	26.0701	-5.04278	3.0089e-05	0.00128562	0.00217567	2.31869
sl00256	Creatinine	HMDB0000562	2a	0.249779	0.143855	0.355702	28.6437	4.84612	4.99084e-05	0.00182947	0.00317108	1.82396
x00365	2-Nitro-9H-fluorene		3	-0.557971	-0.794668	-0.321273	23.8658	-4.84573	5.06024e-05	0.00182947	0.00317108	1.81261
x00806	2-(1-Naphthyl)-2-oxoethyl thiocyanate		3	-0.579233	-0.826659	-0.331807	21.9958	-4.81227	5.5275e-05	0.00185566	0.0032474	1.72671
x00351	2-Amino-4-methylpyrimidine		2b	0.238243	0.133423	0.343062	24.7865	4.67098	7.9336e-05	0.00248586	0.00438681	1.37349
x00734	glutaral		3	-0.493828	-0.726892	-0.260764	22.2851	-4.35554	0.000184376	0.00541603	0.00866565	0.557878
x00588	lys-gln		3	-0.662466	-0.980871	-0.34406	22.3508	-4.27686	0.000226754	0.00626909	0.0101499	0.357788
x00945	[Similar to: 2-({2-[(1,3-Dimethyl-1H-pyrazol-5-yl)amino]-2-oxoethyl}sulfanyl)acetic acid; ΔMass: -148.0069 Da]		unannotated	0.402425	0.202925	0.601925	21.8838	4.1457	0.000317761	0.00829709	0.0129867	0.0305909
x01188			unannotated	-0.495983	-0.747071	-0.244896	20.8639	-4.05973	0.000398032	0.00984604	0.0154687	-0.18649
sl00030	Pantothenic acid	HMDB0000210	1	-0.376019	-0.567701	-0.184338	21.8568	-4.03144	0.000427859	0.0100547	0.0154687	-0.25643
x01226			unannotated	0.199276	0.0970441	0.301508	21.2962	4.00589	0.00045741	0.0102373	0.0159246	-0.320702
sl00197	Isoleucine	HMDB0000172	1	0.280274	0.135681	0.424867	28.678	3.98391	0.000485843	0.0103794	0.0163104	-0.378085
x00274	Mefenamic acid		3	0.397729	0.187609	0.607848	25.0051	3.89101	0.00062154	0.012701	0.0201465	-0.613781
x00616	validamine 7-phosphate		3	-0.483491	-0.741672	-0.225311	19.1282	-3.84854	0.000689111	0.0128519	0.0210304	-0.714399
x00104	DL-Stachydrine		2b	-0.617366	-0.947937	-0.286795	26.3561	-3.83902	0.000711242	0.0128519	0.0210304	-0.743147
x00862	1-Vinylimidazole		2b	0.358026	0.165672	0.55038	22.2372	3.82532	0.00073299	0.0128519	0.0210304	-0.773252
x00935			unannotated	0.283125	0.130887	0.435362	22.1295	3.82196	0.000738301	0.0128519	0.0210304	-0.780509
x01042			unannotated	0.176156	0.0780669	0.274245	22.0246	3.69069	0.00103644	0.0173975	0.0278359	-1.10517
x00406			unannotated	0.142954	0.0629317	0.222975	24.4499	3.67128	0.00108954	0.017658	0.028449	-1.1529
x00594	3-Ureidopropionic acid	HMDB0000026	2a	0.511131	0.224042	0.79822	22.8687	3.6598	0.00112894	0.0176868	0.0286813	-1.18537
x00076	[Similar to: N-allyl-2-(2-methyl-1-benzofuran-3-yl)acetamide; ΔMass: -51.9738 Da]		unannotated	-0.612298	-0.957448	-0.267147	26.4901	-3.64667	0.00116763	0.0177028	0.0288835	-1.21754
x01145	[Similar to: Evonine; ΔMass: -542.1590 Da]		unannotated	-0.570382	-0.900566	-0.240197	20.5626	-3.551	0.00149111	0.0219006	0.0359395	-1.45073
x00610			unannotated	0.190285	0.0785279	0.302042	23.4933	3.49914	0.00169243	0.0241044	0.0382408	-1.57264
sl00181	Alanine	HMDB0000161	2a	0.1901	0.077672	0.302527	26.1407	3.47487	0.00180008	0.0248834	0.0393505	-1.63125
x00962	[Similar to: 1-(4-methoxyphenyl)propane-1,2-diol; ΔMass: -93.0789 Da]		unannotated	0.199517	0.0799418	0.319093	21.9871	3.42901	0.00202202	0.0271528	0.0422377	-1.74164
x00699			unannotated	0.153762	0.0605777	0.246946	23.229	3.39108	0.00222545	0.0290545	0.0453952	-1.83254
x01180	[Similar to: 1-chloro-2-[({[(1-cyclopropylethylidene)amino]oxy}carbonyl)amino]benzene; ΔMass: -108.0420 Da]		unannotated	-0.413308	-0.664955	-0.161661	21.0771	-3.37564	0.00231805	0.0290712	0.0453952	-1.87067
x00472	[Similar to: 6-[4-(3,4-dimethoxyphenyl)-hexahydrofuro[3,4-c]furan-1-yl]-4-methoxy-2H-1,3-benzodioxole; ΔMass: -136.3069 Da]		unannotated	0.222576	0.0865118	0.35864	24.0332	3.36175	0.00239618	0.0290712	0.0456019	-1.90256
x00884			unannotated	0.165438	0.0641216	0.266755	22.4922	3.35572	0.00243283	0.0290712	0.0456019	-1.91693
sl00039	Taurine	HMDB0000251	1	0.332776	0.128633	0.536918	25.2514	3.35089	0.00247415	0.0290712	0.0456019	-1.93158
x00291			unannotated	0.204403	0.0782458	0.33056	25.1596	3.32971	0.00259721	0.0297729	0.0469495	-1.97879
x01086			unannotated	0.260224	0.0986445	0.421803	21.6887	3.30973	0.00273073	0.0305582	0.0484319	-2.02619
x00302			unannotated	0.154319	0.0575206	0.251117	25.199	3.27629	0.00296912	0.0317831	0.050853	-2.10525
x01333	5-Chlorooctyl acetate		3	0.472465	0.176029	0.768901	20.1191	3.27544	0.00297544	0.0317831	0.050853	-2.10726
x00703			unannotated	0.137167	0.0503341	0.223999	23.124	3.24636	0.00319938	0.0328173	0.0525971	-2.17573
x00710			unannotated	0.136602	0.0496342	0.22357	23.0568	3.22797	0.00334937	0.0328173	0.0525971	-2.21892
x01206			unannotated	1.24013	0.450675	2.02958	20.2466	3.22911	0.00335396	0.0328173	0.0525971	-2.21899
sl00064	3-Hydroxy-2-methyl-4-pyrone	HMDB0030776	2a	-0.586549	-0.960048	-0.21305	19.6148	-3.22766	0.00335726	0.0328173	0.0525971	-2.22068
x00981			unannotated	0.154382	0.0558332	0.25293	22.0795	3.21942	0.00342138	0.0328173	0.0527229	-2.23896
x00215			unannotated	0.1121	0.0400219	0.184179	25.9356	3.19619	0.00362454	0.0336425	0.0544688	-2.29328
x01349	[Similar to: Benthiavalicarb isopropyl; ΔMass: -50.1678 Da]		unannotated	-0.557363	-0.916025	-0.198701	19.9335	-3.19393	0.00365057	0.0336425	0.0544688	-2.29956
x01184	Methyl Yellow		3	-0.510301	-0.84151	-0.179092	20.8074	-3.16713	0.00391063	0.0353461	0.0565537	-2.36357
sl00225	1-Phenylethyl acetate	HMDB0032620	2a	-0.712842	-1.1802	-0.245482	20.1388	-3.13533	0.00422967	0.0375084	0.0593416	-2.43728
x01052	2-[3-carboxylato-3-(methylammonio)propyl]-L-histidine dizwitterion		3	-0.495352	-0.825244	-0.16546	21.5323	-3.08663	0.00476727	0.0414929	0.0649455	-2.54956
x00097	Serotonin	HMDB0000259	1	0.350011	0.114209	0.585813	26.9614	3.05124	0.00519822	0.0444212	0.0698047	-2.63062
x00762			unannotated	0.136129	0.0435085	0.228749	22.9331	3.02047	0.00558362	0.0460041	0.0714361	-2.69862
x00063			unannotated	0.29139	0.0929817	0.489799	28.2963	3.01895	0.00562369	0.0460041	0.0714361	-2.70421
x00521	[Similar to: 6-[4-(3,4-dimethoxyphenyl)-hexahydrofuro[3,4-c]furan-1-yl]-4-methoxy-2H-1,3-benzodioxole; ΔMass: -140.1482 Da]		unannotated	0.153985	0.0486419	0.259328	23.721	3.00403	0.00581167	0.0460041	0.0722443	-2.73602
x00689			unannotated	0.127654	0.0401279	0.215181	23.1362	2.99728	0.00590772	0.0460041	0.0722443	-2.75133
x00837	[Similar to: 2-(5-chloro-3-methyl-1-benzothiophen-2-yl)acetohydrazide; ΔMass: 7.9583 Da]		unannotated	0.161542	0.0507543	0.272329	22.5445	2.99657	0.00591788	0.0460041	0.0722443	-2.75293
x00171			unannotated	0.104338	0.0325525	0.176124	26.4444	2.98701	0.00605696	0.0460041	0.0723859	-2.77461
x00961	indoline-2-carboxylic acid		2b	1.10222	0.343581	1.86086	21.1221	2.98659	0.0060835	0.0460041	0.0723859	-2.77761
x00979	[Similar to: N-[2-(1,5-dimethyl-4-nitro-1H-pyrazol-3-yl)vinyl]-N,N-dimethylamine; ΔMass: 0.9862 Da]		unannotated	0.562627	0.174228	0.951027	21.2793	2.97772	0.00621547	0.0460041	0.0726979	-2.79764
x00439			unannotated	0.130564	0.040315	0.220812	24.41	2.97312	0.00626439	0.0460041	0.0726979	-2.80603
x01210			unannotated	-0.631916	-1.07209	-0.191744	20.3299	-2.95107	0.00662919	0.0473096	0.0754701	-2.85773
x00651	[Similar to: N-tetrahydrothiophen-3-yl-N'-(2,3,4-trichlorophenyl)urea; ΔMass: 27.9246 Da]		unannotated	0.121157	0.0366754	0.205639	23.3841	2.94725	0.00666902	0.0473096	0.0754701	-2.86437
sl00165	α-aminobutyric acid	HMDB0000650	2a	-0.304317	-0.516849	-0.0917852	18.9266	-2.94261	0.00674413	0.0473096	0.0754701	-2.8748
x01363	[Similar to: N,N-Diethyl-3-[(2S,5aS,8aR)-1-methyl-5-oxodecahydropyrrolo[3,2-E][1,4]diazepin-2-yl]propanamide; ΔMass: -142.1469 Da]		unannotated	-0.461733	-0.788619	-0.134846	20.141	-2.90301	0.00742398	0.0513128	0.0812393	-2.96393
x00423	[Similar to: 5-hydroxy-6,8-dimethoxy-7-{[(2S,3R,4S,5S,6R)-3,4,5-trihydroxy-6-(hydroxymethyl)oxan-2-yl]oxy}-2H-chromen-2-one; ΔMass: -217.0134 Da]		unannotated	0.190518	0.0546139	0.326422	24.2034	2.88094	0.00782253	0.0528536	0.0820918	-3.01273
x01122	2-Acetylphenanthrene		3	0.361914	0.103	0.620829	21.1091	2.87321	0.00798731	0.0528536	0.0820918	-3.03129
x00525			unannotated	0.105072	0.0298908	0.180253	23.9614	2.87216	0.00798878	0.0528536	0.0820918	-3.03225
sl00095	Daidzein	HMDB0003312	2a	-1.13739	-1.95339	-0.32139	17.7199	-2.86524	0.00814615	0.0528536	0.0820918	-3.04934
x00789	N-4-hydroxyphenylacetylglutamic acid		3	-0.731559	-1.257	-0.206123	22.0407	-2.86201	0.00820918	0.0528536	0.0820918	-3.05649
x01113			unannotated	0.175519	0.0486159	0.302423	21.585	2.84238	0.00857773	0.0537965	0.0840571	-3.09822
x00627	[Similar to: N-tetrahydrothiophen-3-yl-N'-(2,3,4-trichlorophenyl)urea; ΔMass: 5.9426 Da]		unannotated	0.113273	0.0313652	0.195181	23.5079	2.84205	0.00858455	0.0537965	0.0840571	-3.09895
x01232			unannotated	0.191075	0.0514565	0.330693	21.3643	2.8125	0.00920992	0.0562966	0.0849816	-3.16406
x00073			unannotated	0.0993382	0.0267363	0.17194	28.1234	2.8119	0.00922306	0.0562966	0.0849816	-3.16538
x01059	2-(5-Amino-4-cyano-1H-imidazol-1-yl)-5-(4-methyl-1-piperazinyl)benzoic acid		3	-0.673821	-1.16849	-0.179154	21.1607	-2.8001	0.00951119	0.057311	0.0849816	-3.19285
x00697	N-((4-AMINO-2-METHYL-5-PYRIMIDINYL)METHYL)FORMAMIDE		3	-0.97906	-1.70334	-0.254783	21.9103	-2.77873	0.010004	0.0590597	0.0878858	-3.23954
sl00128	Lactic acid	HMDB0000190	1	0.386958	0.10021	0.673706	31.9057	2.77399	0.0101166	0.0590597	0.0880517	-3.24988
sl00015	Galactonic/Gluconic acid		2a	-0.530574	-0.92433	-0.136817	22.794	-2.76988	0.0102153	0.0590597	0.0880526	-3.25884
x01012			unannotated	-0.60049	-1.04672	-0.154256	20.8023	-2.76621	0.010304	0.0590597	0.0880526	-3.26683
x01407	2-(5-Amino-4-cyano-1H-imidazol-1-yl)-5-(4-methyl-1-piperazinyl)benzoic acid		3	-0.745843	-1.30146	-0.190221	19.4664	-2.75937	0.0104713	0.0592955	0.0886761	-3.28169
x00426	[Similar to: ethyl 4-oxo-7-(trifluoromethyl)-4H-pyrido[1,2-a]pyrimidine-3-carboxylate; ΔMass: -96.0235 Da]		unannotated	0.152833	0.0382446	0.267422	24.1812	2.74099	0.0109057	0.0605985	0.0911659	-3.32011
x00105			unannotated	0.098644	0.0246281	0.17266	27.4827	2.7389	0.0109593	0.0605985	0.0911659	-3.32463
x00829	2-Pyrrolidone		3	-0.19032	-0.333533	-0.0471066	22.1666	-2.73107	0.011163	0.061007	0.0920457	-3.3416
x00141			unannotated	0.100827	0.0246478	0.177006	26.9129	2.72002	0.0114561	0.0610616	0.0928971	-3.36546
x00378			unannotated	0.103467	0.025212	0.181723	24.5702	2.71719	0.0115323	0.0610616	0.0928971	-3.37156
x00698			unannotated	0.158044	0.0384612	0.277627	23.1521	2.71607	0.0115627	0.0610616	0.0928971	-3.37399
x00421	[Similar to: N'3-(3,5-dibromo-4-hydroxybenzylidene)-5-methylisoxazole-3-carbohydrazide; ΔMass: -253.9044 Da]		unannotated	0.253675	0.0609061	0.446443	24.1065	2.7051	0.0118931	0.0617953	0.0947417	-3.39898
x01194			unannotated	0.269681	0.0641703	0.475191	21.0767	2.69679	0.0120962	0.0617953	0.0954562	-3.41547
x01146	1,2,3,4,6,7,8-Heptachlorodibenzofuran		3	0.176332	0.0417815	0.310882	21.5466	2.69325	0.0121966	0.0617953	0.0954562	-3.42307
x01189	[Similar to: 2,3-dimethoxy-5-(6,7,8-trimethoxy-3,4-dihydro-2H-1-benzopyran-3-yl)cyclohexa-2,5-diene-1,4-dione; ΔMass: -258.1514 Da]		unannotated	0.340639	0.0804034	0.600875	20.8699	2.69026	0.0122918	0.0617953	0.0954562	-3.42992
x00098	Xanthurenate		3	-0.402468	-0.710439	-0.0944979	19.2136	-2.68568	0.0124142	0.0617953	0.0954562	-3.43931
x00818	[Similar to: N-(3-methylphenyl)-2-(3-pyridinyl)-1-pyrrolidinecarboxamide; ΔMass: -174.0943 Da]		unannotated	0.498376	0.116694	0.880059	21.9438	2.68409	0.0124905	0.0617953	0.0954562	-3.44404
x01367			unannotated	-0.368757	-0.652393	-0.0851209	20.1756	-2.67184	0.0128212	0.0627703	0.0965216	-3.46893
x01252			unannotated	0.176109	0.0401241	0.312094	21.1085	2.66147	0.013134	0.0635438	0.0979841	-3.49105
x00673	[Similar to: N-(3,5-dimethyl-4-isoxazolyl)-N'-{[1-(phenylsulfonyl)-4-piperidinyl]methyl}urea; ΔMass: -265.1273 Da]		unannotated	0.196198	0.0444863	0.34791	23.2066	2.6577	0.0132495	0.0635438	0.0980675	-3.49908
x00078	Histidine	HMDB0000177	1	0.330189	0.0720639	0.588314	23.8519	2.62951	0.0141769	0.0666555	0.102931	-3.56018
x00630	Ethyl lactate		3	-0.266724	-0.475568	-0.0578795	22.6492	-2.62531	0.0143149	0.0666555	0.102931	-3.56905
sl00199	Leucine	HMDB0000687	1	0.184774	0.0400361	0.329512	29.4288	2.62381	0.0143446	0.0666555	0.102931	-3.57149
sl00008	Asparagine	HMDB0000168	2a	0.239337	0.0515897	0.427084	21.7579	2.61979	0.0144657	0.0666555	0.103013	-3.57951
x00888	[Similar to: ethyl 2-[({[3-(2,6-dichlorophenyl)-5-methylisoxazol-4-yl]amino}carbonyl)amino]-4-methylthiophene-3-carboxylate; ΔMass: -296.0119 Da]		unannotated	-1.13698	-2.03027	-0.243685	21.0368	-2.61638	0.0146131	0.0666811	0.103281	-3.58791
sl00151	Tauro-a/b-Muricholic acid		2a	1.08027	0.226129	1.93442	19.3388	2.59983	0.0151808	0.0686058	0.106493	-3.62276
sl00147	Serine	HMDB0000187	1	0.220862	0.0458554	0.395869	22.8541	2.59378	0.0153704	0.0688009	0.106964	-3.63469
x00388			unannotated	0.11441	0.023286	0.205534	24.5178	2.58025	0.0158445	0.0697323	0.108136	-3.66269
x00342	5-Nitro-o-toluidine		3	0.271672	0.0552466	0.488098	24.5892	2.58035	0.0158752	0.0697323	0.108136	-3.66361
x01191			unannotated	0.132707	0.0254147	0.24	21.3579	2.54189	0.0172983	0.0752798	0.116982	-3.74269
x01376	3-hydroxy-cis-5-octenoylcarnitine		3	0.401972	0.0754121	0.728532	20.3553	2.52992	0.0177904	0.0767111	0.119332	-3.76789
x00524	[Similar to: GPH; ΔMass: -198.1141 Da]		unannotated	0.168153	0.0308001	0.305506	23.7236	2.51593	0.0183512	0.0784098	0.120814	-3.79641
x00842	N-Acetylhistamine		2b	0.422204	0.0745358	0.769872	21.9465	2.49632	0.0192232	0.0807691	0.125275	-3.83775
sl00045	Uric acid	HMDB0000289	1	0.215325	0.0376983	0.392952	24.6288	2.49189	0.0194166	0.0807691	0.125275	-3.84683
x01251			unannotated	0.274453	0.0477461	0.501159	20.8703	2.48791	0.019554	0.0807691	0.125275	-3.85402
x01235	3-(1-hydroxyethyl)-2,3,6,7,8,8a-hexahydropyrrolo[1,2-a]pyrazine-1,4-dione		2b	-0.46682	-0.852523	-0.0811171	20.5642	-2.48793	0.0195908	0.0807691	0.125275	-3.85493
sl00207	Phenylalanine	HMDB0000159	1	0.152918	0.0254573	0.280379	28.844	2.46555	0.0205657	0.0830675	0.129482	-3.89972
x01275			unannotated	0.146141	0.0243163	0.267965	20.944	2.46529	0.0205777	0.0830675	0.129482	-3.90024
sl00018	Glutamine	HMDB0000641	2a	0.168545	0.027924	0.309166	26.712	2.46338	0.0206785	0.0830675	0.129482	-3.90441
x00803	Toxopyrimidine		3	-0.418867	-0.769507	-0.0682275	22.0062	-2.4556	0.0210703	0.0832538	0.129506	-3.92087
x00765			unannotated	0.118532	0.0192915	0.217772	22.9053	2.45458	0.0210791	0.0832538	0.129506	-3.92203
sl00141	Pyruvic acid	HMDB0000243	2a	0.327155	0.0518177	0.602492	25.259	2.44248	0.0216996	0.08499	0.132452	-3.94747
x00582			unannotated	0.0981931	0.0146615	0.181725	23.719	2.4158	0.0229919	0.0884851	0.138645	-4.00046
x01356	capuride		3	-0.567612	-1.05055	-0.084672	19.8669	-2.41602	0.0230213	0.0884851	0.138645	-4.00085
sl00187	Choline	HMDB0000097	1	0.145663	0.0215848	0.269741	29.4462	2.4126	0.0231567	0.0884851	0.138645	-4.0069
x00685			unannotated	0.131636	0.0187924	0.24448	23.1981	2.39734	0.0239574	0.0886962	0.140616	-4.03752
sl00176	4-Guanidinobutyric acid	HMDB0003464	1	-0.307127	-0.570402	-0.043852	26.4855	-2.39801	0.0239631	0.0886962	0.140616	-4.03699
sl00289	N8-Acetylspermidine	HMDB0002189	2a	-0.457381	-0.849744	-0.0650181	18.742	-2.39564	0.024048	0.0886962	0.140616	-4.04092
x01218			unannotated	0.234546	0.0332371	0.435855	21.2823	2.3944	0.0241145	0.0886962	0.140616	-4.04341
x00142	2-Methoxy-5-methylaniline		2b	0.158159	0.0221333	0.294184	26.6105	2.38962	0.024381	0.0886962	0.140616	-4.05314
x00757			unannotated	0.152748	0.0213679	0.284127	22.8636	2.38934	0.0243872	0.0886962	0.140616	-4.05353
x00668			unannotated	0.150586	0.0209199	0.280253	23.335	2.38665	0.024533	0.0886962	0.140616	-4.05889
x01417			unannotated	0.181859	0.0241016	0.339616	19.9945	2.36906	0.0255082	0.0915181	0.142398	-4.09393
sl00016	Glutamic acid	HMDB0000148	1	-0.192375	-0.359888	-0.0248623	23.9045	-2.36061	0.0260251	0.092665	0.143062	-4.11134
sl00118	Homocitrulline	HMDB0000679	2a	-0.35768	-0.670581	-0.0447792	18.1405	-2.34919	0.0266522	0.0941846	0.145658	-4.13331
x00572	p-Cresylsulfate		3	-1.70345	-3.20228	-0.204613	19.3146	-2.33624	0.0274673	0.0961335	0.149173	-4.15959
x00138	Indoline		3	0.160183	0.0190901	0.301275	26.672	2.33334	0.0276128	0.0961335	0.149173	-4.16481
x00129			unannotated	0.102298	0.0112091	0.193388	27.091	2.30798	0.0291762	0.100829	0.155827	-4.21431
x00348			unannotated	-0.244392	-0.462632	-0.0261526	24.4672	-2.30195	0.0296087	0.1012	0.156298	-4.22676
x01227	Dipropyl sulfite		3	-0.376539	-0.713369	-0.0397093	20.3833	-2.29786	0.0298666	0.1012	0.156298	-4.23462
x01154	Acetanilide		3	0.258897	0.0272007	0.490593	21.3719	2.29658	0.0299294	0.1012	0.156298	-4.23681
x00568	1-Oxo-1,2,4-butanetricarboxylic acid		3	0.149623	0.0153239	0.283922	23.4702	2.28958	0.0303718	0.101962	0.157732	-4.25017
x00748			unannotated	0.11618	0.0112465	0.221113	22.935	2.27535	0.031327	0.103469	0.159958	-4.27778
x01258			unannotated	0.13287	0.0128457	0.252895	21.1384	2.27504	0.0313482	0.103469	0.159958	-4.27838
x01044			unannotated	0.119654	0.0114754	0.227832	21.9509	2.27309	0.0314811	0.103469	0.159958	-4.28215
x01212	[Similar to: 1-(4-methoxyphenyl)propane-1,2-diol; ΔMass: -52.0524 Da]		unannotated	0.183884	0.0165873	0.351181	21.1414	2.25885	0.0324684	0.105961	0.163721	-4.30964
x00036	[Similar to: Udenafil; ΔMass: -314.2066 Da]		unannotated	0.140666	0.012355	0.268977	29.129	2.25298	0.0328839	0.105961	0.163721	-4.32095
x00968	[Similar to: Microcystin LF; ΔMass: -455.2136 Da]		unannotated	0.902413	0.0791304	1.72569	19.928	2.25319	0.0329156	0.105961	0.163721	-4.32113
x00209			unannotated	0.098036	0.00818927	0.187883	25.9755	2.24241	0.0336434	0.107567	0.166446	-4.34124
x00002			unannotated	-0.32869	-0.632558	-0.0248214	30.5595	-2.22353	0.0350878	0.111097	0.170654	-4.3779
x00891	3,3'-Methylenebis([1,2,4]triazolo[4,3-a]pyridine)		3	-0.678975	-1.30717	-0.0507787	21.3806	-2.22178	0.03522	0.111097	0.170654	-4.38123
sl00223	Indole-3-carboxyaldehyde	HMDB0029737	1	0.759817	0.0555013	1.46413	23.0941	2.2176	0.035537	0.111349	0.171307	-4.38918
x00127			unannotated	0.0950296	0.00629759	0.183762	27.1373	2.20095	0.0367781	0.113873	0.175723	-4.42023
sl00282	Isovalerylcarnitine	HMDB0000688	2a	-0.366071	-0.70797	-0.0241726	23.7639	-2.20095	0.036827	0.113873	0.175723	-4.42076
x00896	S-methyl D-thioglycerate		3	-0.512446	-0.992889	-0.0320028	21.5539	-2.19254	0.0374943	0.114893	0.176575	-4.43665
x00179	[Similar to: N-[4,5-dihydroxy-2-({4-[hydroxy(phenyl)methyl]-5-oxo-3-phenyl-2,5-dihydrofuran-2-yl}oxy)-6-(methoxymethyl)oxan-3-yl]acetamide; ΔMass: -382.1044 Da]		unannotated	-0.217083	-0.421066	-0.0130987	26.1321	-2.18762	0.0378903	0.114893	0.176575	-4.44593
x00178	Pulcherriminic acid		3	-0.217083	-0.421066	-0.0130987	26.1321	-2.18762	0.0378903	0.114893	0.176575	-4.44593
x01120			unannotated	0.105372	0.00537547	0.205368	21.6717	2.16557	0.0396589	0.119485	0.182373	-4.48684
sl00294	N-Acetyl-tryptophan	HMDB0013713	2a	-0.334414	-0.658065	-0.0107637	19.574	-2.12344	0.043352	0.129419	0.187779	-4.56518
sl00266	Hexose		2a	0.130673	0.00407766	0.257268	28.9483	2.12129	0.0435487	0.129419	0.187779	-4.56915
x00322			unannotated	0.0776717	0.00233338	0.15301	25.0937	2.11874	0.0437822	0.129419	0.187924	-4.57384
x00912	[Similar to: DL-Carnitine; ΔMass: 117.0790 Da]		unannotated	-0.3414	-0.676514	-0.00628705	21.893	-2.09418	0.0461477	0.135559	0.194524	-4.61936
x00087	5',6'-Diamino-1,3'-bis(2-deoxy-beta-D-erythro-pentofuranosyl)-4',5'-dihydro-4,4'-bipyrimidine-2,2'(1H,3'H)-dione		3	0.107484	0.00114971	0.213818	27.643	2.07731	0.0477455	0.138036	0.199499	-4.64971
x01353			unannotated	0.168476	0.00179659	0.335156	20.6051	2.07724	0.0477524	0.138036	0.199499	-4.64983
x00907			unannotated	0.169212	0.00144442	0.33698	22.3731	2.07278	0.0481973	0.138036	0.199788	-4.65793
sl00153	Taurochenodeoxycholic acid	HMDB0000951	2a	0.865792	0.00651176	1.72507	18.2447	2.07119	0.0484108	0.138036	0.199788	-4.66121
x00643	(4aS,10aS)-4a,7-Dimethyl-3,4,4a,9,10,10a-hexahydro-2(1H)-phenanthrenone		3	0.36472	0.00265892	0.726782	22.8736	2.07071	0.0484593	0.138036	0.199788	-4.66208
sl00267	Galactosamine/Glucosamine		2a	0.128498	0.00072457	0.25627	27.8322	2.06674	0.0488061	0.138064	0.200339	-4.66889
x00733	Carbaryl		3	0.563637	0.00250905	1.12476	21.8972	2.06481	0.0490568	0.138064	0.200493	-4.67278
x01058			unannotated	0.139034	-0.000785681	0.278854	21.7986	2.04354	0.0512086	0.143262	0.205881	-4.71075
sl00129	Leucyl-alanine	HMDB0028922	2a	0.404949	-0.0034789	0.813377	18.7365	2.03759	0.051842	0.144021	0.205881	-4.72145
x00756	[Similar to: 4-(3,4-dimethoxyphenyl)-3-methyl-1H-pyrazol-5-amine; ΔMass: -0.0457 Da]		unannotated	-0.544575	-1.09446	0.00531215	22.0507	-2.03576	0.0520928	0.144021	0.205881	-4.72508
sl00036	Pyroglutamic acid	HMDB0000267	2a	0.129437	-0.00161682	0.260492	22.1908	2.02974	0.0526873	0.144686	0.20603	-4.7355
sl00227	2-Aminoadipic acid	HMDB0000510	2a	0.123229	-0.00168737	0.248145	24.0042	2.02733	0.0529489	0.144686	0.20603	-4.7398
x00079	[Similar to: N-(2,5-diethoxy-4-morpholinophenyl)acetamide; ΔMass: -140.1225 Da]		unannotated	0.153649	-0.00444821	0.311747	27.6876	1.99778	0.0563122	0.152987	0.214305	-4.79265
x00173	[Similar to: N-(2-hydroxyethyl)-N'-propylthiourea; ΔMass: -3.1746 Da]		unannotated	0.23339	-0.00852658	0.475307	26.2385	1.98316	0.0580145	0.156706	0.219894	-4.81841
x01335			unannotated	-0.24987	-0.510998	0.0112582	20.2626	-1.96649	0.0599549	0.161022	0.224532	-4.84733
x00713			unannotated	0.0978643	-0.00545454	0.201183	22.9474	1.9466	0.0624157	0.166434	0.230081	-4.88196
x01098	(2R)-2,3-Dihydroxypropyl 2-(palmitoylamino)ethyl phosphate		3	-1.22186	-2.51323	0.0695098	19.2222	-1.94497	0.0626785	0.166434	0.230148	-4.88506
x00296	Indole-3-carbidol		3	0.667708	-0.0423806	1.3778	23.7892	1.93293	0.0642152	0.169557	0.233059	-4.90587
sl00158	Uracil	HMDB0000300	2a	-0.19069	-0.39548	0.0141009	20.7305	-1.91359	0.0666944	0.175119	0.241126	-4.93885
x00634	[Similar to: N1-bicyclo[2.2.1]hept-5-en-2-yl-2-(5-fluoro-2-oxo-2,3-dihydro-1H-indol-3-yliden)hydrazine-1-carbothioamide; ΔMass: -120.1842 Da]		unannotated	0.101752	-0.00778743	0.211291	23.4103	1.90899	0.0673103	0.175755	0.24242	-4.94672
x01095	DL-4-Hydroxyphenyllactic acid		2b	0.18098	-0.0141578	0.376119	21.3923	1.90599	0.0677148	0.175834	0.242946	-4.95184
x00404			unannotated	0.0934047	-0.00787697	0.194686	24.5063	1.89526	0.0691786	0.178648	0.247254	-4.97012
x00114	[Similar to: 2-(3,4-dihydroisoquinolin-1-yl)-N-propylhydrazine-1-carboxamide; ΔMass: -58.0989 Da]		unannotated	0.206022	-0.0192312	0.431275	26.9784	1.88012	0.0713511	0.182393	0.250795	-4.99601
sl00219	Valine	HMDB0000883	1	0.175128	-0.0164569	0.366714	29.2351	1.87904	0.0715032	0.182393	0.250795	-4.99783
x01002			unannotated	0.0947702	-0.00901497	0.198555	21.962	1.87658	0.0717928	0.182393	0.250875	-5.00176
x01352	[Similar to: 4-{[2-(4-fluorophenyl)-2-oxoethyl]amino}-4-oxobutanoic acid; ΔMass: 25.9084 Da]		unannotated	-0.905168	-1.90235	0.0920178	19.4487	-1.86593	0.0733816	0.185427	0.25273	-5.01991
sl00211	Pyridoxal	HMDB0001545	1	-0.2274	-0.478495	0.0236951	24.3417	-1.86163	0.074006	0.186004	0.253889	-5.02711
x01318	4-vinylphenol sulfate		3	-0.842689	-1.77854	0.0931605	19.3229	-1.85099	0.075574	0.188935	0.257804	-5.04492
sl00272	Guanidoacetic acid	HMDB0000128	2a	0.244571	-0.0282732	0.517415	22.1734	1.84261	0.0768283	0.190372	0.257804	-5.05889
x01197	3-hydroxy-cis-5-octenoylcarnitine		3	0.374223	-0.0434578	0.791904	20.4246	1.84174	0.0769591	0.190372	0.257804	-5.06033
sl00301	Prostaglandin E2	HMDB0001220	2a	0.46242	-0.0567241	0.981563	18.616	1.83095	0.0785948	0.192933	0.259485	-5.07821
x01292	2-Hydroxyisocaproic acid	HMDB0000746	2a	-0.349096	-0.741726	0.043534	20.2804	-1.82769	0.0791044	0.192933	0.259485	-5.08362
x00014	(2E)-3-[3-(Trifluoromethyl)phenyl]acrylic acid		3	0.107466	-0.0134484	0.22838	30.3816	1.82652	0.0792259	0.192933	0.259485	-5.08538
sl00229	2-Methylbutyrylglycine	HMDB0000339	2a	0.187024	-0.0239594	0.398006	20.4893	1.82171	0.0799729	0.193749	0.261023	-5.09331
x01147	Helicin		3	-1.37758	-2.9504	0.195231	18.3265	-1.80046	0.0834121	0.201044	0.2697	-5.12838
x01045	[Similar to: (3beta,5xi,9xi)-3-[(6-Deoxy-beta-D-glucopyranosyl)oxy]urs-12-ene-27,28-dioic acid; ΔMass: -277.1566 Da]		unannotated	-0.378238	-0.811048	0.0545725	20.6629	-1.79643	0.084066	0.201587	0.2697	-5.13496
sl00232	2-Picolinic acid	HMDB0002243	2a	-0.222915	-0.479177	0.0333468	21.2698	-1.78807	0.0854293	0.203816	0.273116	-5.14855
sl00156	Tauroursodeoxycholic acid	HMDB0000874	2a	0.964482	-0.164119	2.09308	18.8135	1.75669	0.0907537	0.215425	0.284361	-5.19922
sl00043	Tryptophan	HMDB0000929	1	-0.128848	-0.280194	0.0224987	23.9515	-1.74973	0.0919288	0.217118	0.285192	-5.21027
x00608	D-(−)-Erythrose		3	0.249137	-0.0443393	0.542613	23.0579	1.74505	0.0927975	0.218074	0.285999	-5.21783
x00937			unannotated	0.153505	-0.0279952	0.335004	22.2575	1.73811	0.0939721	0.219736	0.288673	-5.22876
sl00184	Betaine	HMDB0000043	1	-0.125941	-0.275332	0.0234496	30.6222	-1.73277	0.0949693	0.220968	0.290785	-5.23731
x00247			unannotated	0.121265	-0.0245431	0.267074	25.6924	1.70931	0.0992731	0.229844	0.302976	-5.27428
x00987			unannotated	0.130437	-0.0269152	0.28779	22.1037	1.70357	0.100336	0.231165	0.304603	-5.28325
x01102	[Similar to: N-(2-hydroxyethyl)-N'-propylthiourea; ΔMass: -0.1400 Da]		unannotated	0.128061	-0.0287182	0.284839	21.568	1.67865	0.10515	0.241075	0.314097	-5.32202
sl00090	Carnosine	HMDB0000033	2a	-1.07263	-2.39605	0.250794	18.1105	-1.66932	0.107541	0.245361	0.318892	-5.32689
x00727	(2E)-octenoylcarnitine		3	-0.441677	-0.988285	0.104931	21.6752	-1.661	0.108736	0.246276	0.320159	-5.34928
x00373	4-(2-Hydroxyethyl)phenyl hydrogen sulfate		3	0.145333	-0.0346632	0.32533	24.5316	1.65975	0.10899	0.246276	0.320159	-5.3512
sl00085	Arginine	HMDB0000517	1	-0.165645	-0.371415	0.0401261	23.6185	-1.65476	0.110007	0.247112	0.322137	-5.35884
sl00041	Threonine	HMDB0000167	1	0.135768	-0.0332597	0.304795	25.0343	1.65108	0.110754	0.247112	0.322852	-5.36445
x01395			unannotated	0.158396	-0.0388972	0.35569	20.2044	1.64992	0.110937	0.247112	0.322852	-5.36615
x01328	4-(Diethylamino)salicylaldehyde		2b	-0.394781	-0.888233	0.0986708	19.3508	-1.64457	0.112107	0.248538	0.325248	-5.37437
x00846	4-Methoxyaniline		3	0.213535	-0.0543351	0.481405	22.4227	1.63865	0.113343	0.250099	0.326816	-5.38337
sl00057	2/3-Hydroxybutyric acid		2a	0.331889	-0.0874765	0.751255	25.4011	1.62683	0.115844	0.253246	0.327682	-5.40124
x01287	2-Acetylphenanthrene		3	-0.172539	-0.390541	0.0454619	20.653	-1.62652	0.115847	0.253246	0.327682	-5.40163
x00349			unannotated	0.0971961	-0.0258302	0.220223	24.7834	1.62361	0.11647	0.253431	0.32779	-5.40602
x00964	3-Hydroxydecanoic acid		2b	-0.465647	-1.05984	0.128542	21.0057	-1.61092	0.119283	0.256489	0.330418	-5.42513
sl00248	7-Methylguanine	HMDB0000897	1	-0.112127	-0.255224	0.0309699	22.5659	-1.61032	0.119352	0.256489	0.330418	-5.42597
x00675			unannotated	0.107433	-0.0297359	0.244601	23.2663	1.60958	0.119513	0.256489	0.330418	-5.42707
x01202			unannotated	0.333108	-0.0969181	0.763134	20.4437	1.59233	0.123408	0.263645	0.334304	-5.45281
x01267			unannotated	0.120835	-0.0357395	0.277409	20.8933	1.586	0.124776	0.265361	0.334861	-5.46212
x00219	Deanol		3	0.167432	-0.0499118	0.384776	25.3419	1.58356	0.125395	0.265475	0.334861	-5.46578
x01337			unannotated	0.0983212	-0.0300919	0.226734	20.7389	1.57351	0.12764	0.269017	0.339891	-5.48051
x00356	4-ethylphenylsulfonic acid		3	-0.546843	-1.26926	0.175579	23.5384	-1.55601	0.131805	0.276555	0.349991	-5.5061
x00773			unannotated	0.123145	-0.0403435	0.286634	22.647	1.54796	0.133665	0.279212	0.351948	-5.51774
x00510	10-HDA		2b	-0.413196	-0.968435	0.142044	21.0487	-1.52974	0.138169	0.28622	0.357972	-5.54403
x00455	[Similar to: (2R,3S,4S,5R,6R)-2-({[(2R,3R,4R,5S)-3,4-dihydroxy-5-(hydroxymethyl)oxolan-2-yl]oxy}methyl)-6-{[(2E)-3,7-dimethylocta-2,6-dien-1-yl]oxy}oxane-3,4,5-triol; ΔMass: -258.1615 Da]		unannotated	-0.107046	-0.250908	0.0368152	24.0966	-1.52925	0.138238	0.28622	0.357972	-5.54471
x00965	2-[[2-(3,5-dimethyl-1-pyrazolyl)-6-methyl-4-pyrimidinyl]amino]ethanol		3	0.339482	-0.121927	0.800892	21.5187	1.51242	0.142498	0.293747	0.366982	-5.56874
x00336	Ornithine	HMDB0000214	1	-0.194973	-0.461073	0.0711284	21.9139	-1.50615	0.144092	0.295735	0.369065	-5.57762
x01156			unannotated	0.193091	-0.0722381	0.45842	21.2811	1.49596	0.146716	0.299811	0.373748	-5.592
x01255			unannotated	0.0897454	-0.0340077	0.213498	21.2125	1.49035	0.148114	0.301357	0.376289	-5.59986
x00919	methyl 2,5-dimethyl-1H-pyrrole-3-carboxylate		2b	0.140937	-0.0552523	0.337126	22.27	1.47644	0.151803	0.307533	0.384623	-5.6193
x00581	2-Ammonio-3-(3-oxo-1-propen-1-yl)-2-butenedioate		3	0.130852	-0.0522606	0.313964	23.5641	1.46894	0.153856	0.309049	0.388377	-5.62972
x00224	Butylated hydroxytoluene		3	-0.200799	-0.482179	0.0805803	25.3211	-1.46694	0.154396	0.309049	0.388377	-5.6325
x01254	PFPeA		3	0.0980713	-0.0393868	0.235529	20.9103	1.46623	0.154524	0.309049	0.388377	-5.63346
x00229	Pyrrolidine		3	0.166262	-0.0683101	0.400834	25.223	1.457	0.1571	0.312868	0.393797	-5.64621
x01030			unannotated	0.0895834	-0.0378444	0.217011	21.9547	1.44476	0.16042	0.318132	0.398927	-5.66299
x01390	Idebenone		3	-0.272371	-0.661975	0.117234	20.289	-1.43707	0.162634	0.321168	0.400381	-5.67347
x00717			unannotated	0.153562	-0.0671208	0.374245	22.7312	1.4304	0.164521	0.322173	0.401259	-5.68252
x00243	4-Hydroxy-5-methylfuran-3(2H)-one		3	0.107359	-0.0470637	0.261782	25.573	1.4289	0.16491	0.322173	0.401259	-5.68455
x01400	delta-guanidinovaleric acid		3	-0.264153	-0.644371	0.116065	19.4285	-1.42787	0.165199	0.322173	0.401259	-5.68594
x00778	6-Methylquinoline		2b	0.140648	-0.0622098	0.343505	22.751	1.42523	0.165997	0.322391	0.402158	-5.68952
x01419			unannotated	0.118959	-0.0536595	0.291578	19.672	1.41625	0.168519	0.325943	0.407219	-5.7016
x00720			unannotated	0.087642	-0.0411824	0.216466	23.0663	1.39812	0.173839	0.333417	0.418472	-5.72582
x00739	[Similar to: N1-bicyclo[2.2.1]hept-5-en-2-yl-2-(5-fluoro-2-oxo-2,3-dihydro-1H-indol-3-yliden)hydrazine-1-carbothioamide; ΔMass: -98.2024 Da]		unannotated	0.0961175	-0.0452644	0.237499	23.0089	1.39714	0.174131	0.333417	0.418472	-5.72713
x00783			unannotated	0.0715933	-0.0338117	0.176998	22.896	1.39586	0.174512	0.333417	0.418472	-5.72883
sl00273	Hexanoyl Glycine	HMDB0000701	2a	0.251244	-0.120178	0.622665	21.4058	1.3905	0.176176	0.335235	0.42032	-5.73592
x01075	Benserazide		3	-0.206336	-0.518827	0.106156	21.4807	-1.35731	0.186359	0.351984	0.43281	-5.77935
x00830	[Similar to: R-Palmitoyl-(1-methyl) Ethanolamide; ΔMass: -96.1256 Da]		unannotated	0.400334	-0.206131	1.0068	21.3782	1.35693	0.186477	0.351984	0.43281	-5.77984
x00843	Cyclophosphamide		3	-0.28576	-0.720002	0.148482	21.7495	-1.35273	0.187798	0.353061	0.434804	-5.78527
x01274			unannotated	0.0943589	-0.0496073	0.238325	21.1401	1.34696	0.189568	0.354646	0.436576	-5.79273
x00595	1,8-Diazabicyclo [5.4.0]undec-7-ene		2b	0.135246	-0.0715381	0.34203	23.4262	1.34446	0.190422	0.354646	0.436576	-5.79591
sl00134	N-Acetyl-phenylalanine	HMDB0000512	2a	0.227412	-0.120641	0.575466	18.3491	1.34276	0.190905	0.354646	0.43662	-5.79812
x00992	N-(3-acetamidopropyl)pyrrolidin-2-one		3	-0.171946	-0.436987	0.0930954	21.7713	-1.33358	0.193916	0.35851	0.438748	-5.80984
x00674	(4S,5R)-4,5-Dihydroxy-3-oxo-1-cyclohexene-1-carboxylate		3	0.345153	-0.188509	0.878815	22.3646	1.3295	0.195242	0.35851	0.438748	-5.81504
x00485	7-ketodeoxycholic acid		3	-0.668224	-1.7027	0.366253	21.0946	-1.32783	0.195784	0.35851	0.438748	-5.81716
x01139			unannotated	0.613307	-0.336707	1.56332	19.8917	1.32706	0.196036	0.35851	0.438748	-5.81814
x01078	Hydrogen bromide		3	0.128155	-0.0712385	0.327548	21.5303	1.32086	0.198008	0.359694	0.441689	-5.82602
sl00131	N-Acetyl-alanine	HMDB0000766	2a	0.169577	-0.0944354	0.433589	19.4672	1.32	0.19829	0.359694	0.441689	-5.82711
x00172	[Similar to: Acetyl-L-carnitine; ΔMass: 28.0345 Da]		unannotated	-0.235838	-0.603637	0.131962	25.9198	-1.31809	0.19898	0.359694	0.442177	-5.8295
x01377			unannotated	0.108636	-0.0611306	0.278402	20.3453	1.31508	0.199914	0.359999	0.443206	-5.83331
x00464	Furfural		3	0.201919	-0.116436	0.520275	23.5852	1.30379	0.203742	0.365491	0.447741	-5.84746
x00619	[Similar to: N-{[(2R,4S,5R)-5-Ethyl-1-azabicyclo[2.2.2]oct-2-yl]methyl}-2-furamide; ΔMass: -96.0211 Da]		unannotated	0.130024	-0.076113	0.336161	23.3748	1.29661	0.206165	0.368433	0.449642	-5.85642
x01374	[Similar to: (1R,9R)-5-Cyclohexyl-11-(propylsulfonyl)-7,11-diazatricyclo[7.3.1.02,7]trideca-2,4-dien-6-one; ΔMass: -172.1016 Da]		unannotated	-0.107873	-0.279814	0.0640685	20.4737	-1.28933	0.208588	0.371351	0.451554	-5.86548
x01013			unannotated	0.349372	-0.209742	0.908486	21.0594	1.28449	0.210309	0.373001	0.453418	-5.87144
x00976			unannotated	-0.549542	-1.43588	0.336801	20.5117	-1.27699	0.213348	0.376336	0.457414	-5.85612
sl00202	Methionine	HMDB0000696	1	0.0717946	-0.0442065	0.187796	28.1152	1.27192	0.214611	0.376336	0.457414	-5.88691
x00624	Thiomorpholine		3	0.0766438	-0.0472743	0.200562	23.384	1.27108	0.214906	0.376336	0.457414	-5.88793
x00397	2-[(1,5-dimethyl-2-benzimidazolyl)amino]ethanol		3	-0.190415	-0.498822	0.117992	23.4093	-1.26917	0.215635	0.376336	0.457414	-5.89024
x00285	(2S,6S)-2-Ammonio-6-[(3-carboxylatopropanoyl)amino]heptanedioate		3	-0.112337	-0.29449	0.0698157	20.8673	-1.26741	0.216193	0.376336	0.457414	-5.89241
x01125	N'-[(3-nitro-6-oxo-1-cyclohexa-2,4-dienylidene)methyl]-1H-indole-3-carbohydrazide		3	-0.135016	-0.35435	0.0843181	21.4139	-1.26516	0.217005	0.376356	0.457414	-5.89515
x00684	Nitrosoheptamethyleneimine		2b	-0.475489	-1.26041	0.309428	21.945	-1.24526	0.224154	0.387324	0.466449	-5.9192
sl00204	Nicotine amide	HMDB0001406	2a	-0.141453	-0.377149	0.0942433	27.756	-1.23368	0.228369	0.392002	0.470339	-5.93304
x00894	[Similar to: Perazine; ΔMass: -199.0456 Da]		unannotated	0.129703	-0.0864898	0.345895	22.3804	1.23323	0.228529	0.392002	0.470339	-5.93357
x00385	Allantoin	HMDB0000462	1	-0.0780814	-0.209433	0.0532702	24.2169	-1.22164	0.232758	0.397804	0.474603	-5.94735
x00389	5alpha-androstane-3alpha-glcosyl-17beta-diol		3	-0.64881	-1.74334	0.445717	22.8284	-1.21852	0.233977	0.398439	0.475809	-5.95099
x00330			unannotated	0.0615017	-0.0429117	0.165915	24.8508	1.21049	0.236933	0.402016	0.479325	-5.96046
x00646	7-Chloroemodin		3	-0.247581	-0.671346	0.176183	22.4381	-1.20098	0.240596	0.406764	0.483049	-5.97152
sl00062	3-(3-Hydroxyphenyl)propionic acid	HMDB0000375	1	0.523916	-0.375881	1.42371	20.38	1.1969	0.242153	0.407928	0.483278	-5.97625
x01257			unannotated	0.120157	-0.0869406	0.327255	21.1049	1.19235	0.243845	0.409054	0.485623	-5.98156
x00053	Proline	HMDB0000162	1	0.123535	-0.0897463	0.336817	28.3272	1.19064	0.244562	0.409054	0.486022	-5.9835
x00041	2,4-Xylidine		2b	0.134327	-0.0980665	0.366721	28.9353	1.18818	0.245513	0.409189	0.486883	-5.98634
x00261	gaboxadol		3	0.551917	-0.411769	1.5156	23.7543	1.17728	0.249758	0.413499	0.487165	-5.99883
x00536			unannotated	-0.530637	-1.45932	0.398045	22.1121	-1.17685	0.25035	0.413499	0.487165	-5.9746
x00591	3,5-Dihydroxybenzoic acid		2b	-0.373623	-1.02753	0.280286	22.2713	-1.17452	0.250843	0.413499	0.487165	-6.00199
x00631	[Similar to: 14,15-Leukotriene E4; ΔMass: -279.3311 Da]		unannotated	0.119749	-0.0901855	0.329683	23.2601	1.17255	0.251619	0.413499	0.487165	-6.00423
x00925	Ile-cys		3	-0.085292	-0.235094	0.0645096	22.1681	-1.1701	0.252529	0.413549	0.487428	-6.00705
x00996	[Similar to: 5-[(4-Methylbenzyl)thio]-1,3,4-thiadiazol-2-amine; ΔMass: 55.9613 Da]		unannotated	0.140816	-0.10943	0.391062	21.8089	1.15671	0.257916	0.419111	0.49377	-6.02214
sl00299	2-Hydroxyphenylacetic acid/ Vanillin		2a	-0.181876	-0.505237	0.141484	19.2221	-1.1559	0.258188	0.419111	0.49377	-6.0231
sl00127	Kynurenine	HMDB0000684	2a	-0.34493	-0.959568	0.269709	18.5104	-1.15359	0.259171	0.419111	0.49377	-6.02564
x01398			unannotated	-0.536929	-1.49436	0.420499	19.3448	-1.1528	0.259492	0.419111	0.49377	-6.02654
x01124	Allantoic acid		3	-0.135215	-0.376904	0.106473	21.1149	-1.14984	0.26065	0.41954	0.493988	-6.02988
sl00054	2′-Deoxycytidine	HMDB0000014	1	0.113881	-0.0922346	0.319996	20.7061	1.13546	0.266498	0.427488	0.49902	-6.04588
x01051	6-Methylindole		2b	-0.0707517	-0.202061	0.0605579	21.8188	-1.10732	0.278253	0.444827	0.513618	-6.07664
x00461			unannotated	-0.130633	-0.37426	0.112994	23.7976	-1.10222	0.280473	0.445297	0.51381	-6.08209
x00060	D-Xylonic acid		3	0.0743842	-0.0644901	0.213258	28.4182	1.10084	0.281026	0.445297	0.51381	-6.08361
x00539	3,4,5-trimethoxyhydrocinnamic acid		3	0.102866	-0.0893971	0.29513	23.5038	1.09981	0.281502	0.445297	0.51381	-6.08468
sl00236	Indole-3-acetic acid	HMDB0000197	1	-0.139716	-0.401873	0.122441	23.1079	-1.09554	0.283335	0.445297	0.516153	-6.08927
x01360	Coumachlor		3	-0.0998194	-0.28748	0.0878415	20.4702	-1.09313	0.284318	0.445297	0.516942	-6.09188
x00863	1-octadecanoyl-2-(7Z,10Z,13Z,16Z-docosatetraenoyl)-sn-glycero-3-phosphocholine		3	-0.513034	-1.48058	0.454512	20.8248	-1.0921	0.28521	0.445297	0.516954	-6.06809
x01357	Kynurenic acid	HMDB0000715	2a	-0.479003	-1.38219	0.42418	19.2459	-1.0902	0.285637	0.445297	0.516954	-6.09497
x00027	N,N′-diisopropylcarbodiimide		3	0.109881	-0.0979363	0.317698	29.3665	1.08688	0.287071	0.445297	0.516954	-6.09849
sl00115	Hippuric acid	HMDB0000714	1	-0.374784	-1.08361	0.334048	24.0871	-1.08688	0.287074	0.445297	0.516954	-6.0985
sl00190	Cytidine	HMDB0000089	1	-0.101389	-0.293602	0.0908229	24.7898	-1.08431	0.288189	0.445555	0.517968	-6.10123
x01361	p-Cresol		3	-0.27671	-0.802987	0.249567	20.0857	-1.08293	0.289184	0.445628	0.518765	-6.10031
x00440	Dihydroxyindole		3	0.277093	-0.259579	0.813766	23.3321	1.06135	0.298298	0.458171	0.532069	-6.12533
x01317	Ethyl acetate		3	-0.232536	-0.693388	0.228316	19.9312	-1.03722	0.309192	0.473355	0.547345	-6.15016
x01369			unannotated	-0.0738649	-0.221593	0.0738632	20.5931	-1.02756	0.313582	0.477332	0.552986	-6.16
x01243	[Similar to: 1-(3,4-dimethoxyphenyl)ethan-1-one oxime; ΔMass: -102.0556 Da]		unannotated	-0.367581	-1.10469	0.369524	20.5222	-1.0251	0.314769	0.477332	0.552986	-6.16243
x00799	5-guanidino-2-oxopentanoic acid		3	-0.262557	-0.789811	0.264696	21.5707	-1.02364	0.315445	0.477332	0.552986	-6.1639
x00670	4-heptyl-3-methyl-1H-pyrazol-5-ol		2b	0.105854	-0.106924	0.318631	23.1401	1.02264	0.315908	0.477332	0.552986	-6.16491
x00784	Pinolenic acid		2b	0.439805	-0.446039	1.32565	19.9811	1.02057	0.316867	0.477332	0.553634	-6.16698
sl00044	Tyrosine	HMDB0000158	1	0.0647257	-0.0665182	0.195969	22.5744	1.01351	0.320115	0.480684	0.55628	-6.17409
x00366			unannotated	0.0823195	-0.0853666	0.250006	24.4731	1.0091	0.322228	0.481052	0.558126	-6.17843
x00431	Levulinic acid		3	0.132038	-0.137032	0.401107	24.1274	1.00873	0.322407	0.481052	0.558126	-6.17879
x01177	2-pentan-3-yl-1H-imidazole		3	0.0985734	-0.103126	0.300273	21.3423	1.00435	0.324425	0.482514	0.560587	-6.18318
x00162	Dimethyl fumarate		3	0.120637	-0.126775	0.368049	24.2755	1.00231	0.325441	0.482514	0.560901	-6.18515
sl00122	Indole-3-carboxylate	HMDB0003320	2a	-0.304602	-0.945949	0.336744	18.5271	-0.976298	0.337921	0.499444	0.570713	-6.21049
x01340			unannotated	-0.184448	-0.574139	0.205243	20.2169	-0.972962	0.339545	0.500271	0.571994	-6.2137
sl00011	cis-Aconitic acid	HMDB0000072	2a	-0.172239	-0.539893	0.195414	20.4274	-0.963022	0.344416	0.505861	0.578127	-6.22319
x00807	[Similar to: N-Cyclopropyl-2-[(2S,3R,4S,5R)-5-({[(3,5-dimethoxyphenyl)carbamoyl]amino}methyl)-3,4-dihydroxytetrahydro-2-furanyl]acetamide; ΔMass: -257.1341 Da]		unannotated	-0.207191	-0.653923	0.239541	21.4948	-0.953378	0.349186	0.51127	0.584048	-6.23232
x00877	N,N-Dimethyl-N-phenylurea		3	0.125077	-0.147879	0.398033	22.3882	0.941946	0.354898	0.518019	0.591761	-6.24302
x00851	carboxynorspermidine		3	-0.115104	-0.367461	0.137252	22.4071	-0.937604	0.357084	0.519596	0.593037	-6.24705
x01010			unannotated	0.113389	-0.138706	0.365484	21.8717	0.924588	0.36369	0.525618	0.597664	-6.25904
x00265			unannotated	0.0646228	-0.079278	0.208524	25.5249	0.922949	0.364493	0.525618	0.597664	-6.26058
x00256	Malondialdehyde		3	0.079023	-0.0969979	0.255044	25.4339	0.922851	0.364578	0.525618	0.597664	-6.26063
x00666			unannotated	0.0680969	-0.0841442	0.220338	23.2819	0.919235	0.366386	0.52661	0.598961	-6.26397
x00792	[Similar to: Chlorhexidine; ΔMass: -380.1031 Da]		unannotated	0.106951	-0.133853	0.347755	22.6688	0.912985	0.369646	0.529676	0.601155	-6.2696
x01413			unannotated	0.07735	-0.0989873	0.253687	20.0997	0.901461	0.375582	0.536546	0.606611	-6.28
x01411			unannotated	0.0974391	-0.133157	0.328035	20.1103	0.868385	0.393094	0.559862	0.628416	-6.30905
x01384			unannotated	-0.129768	-0.439947	0.180411	20.1981	-0.859801	0.397728	0.56475	0.633668	-6.31641
x00768	Edaravone		3	-0.367713	-1.25098	0.515557	21.3598	-0.855772	0.399949	0.566193	0.635779	-6.31981
x01414	HOxAsH-bis(1,2-ethanedithiol)		3	0.063682	-0.0904316	0.217796	20.1984	0.849194	0.403491	0.569492	0.637448	-6.32543
sl00297	N-Acetyl-glutamine	HMDB0006029	2a	-0.109443	-0.376008	0.157123	21.4772	-0.843965	0.406394	0.571872	0.640957	-6.32979
x01343	1-O-Arsonopentofuranose		3	0.17482	-0.2624	0.612041	20.3407	0.821927	0.418599	0.586836	0.654714	-6.34807
x01372	2,2'-({2-[(Carboxylatomethyl)amino]ethyl}ammonio)diacetate		3	-0.107507	-0.376875	0.161862	20.1995	-0.820201	0.419525	0.586836	0.655073	-6.34952
x00283	Urocanic acid	HMDB0000296	1	-0.304506	-1.07199	0.462974	23.9727	-0.815589	0.422151	0.588756	0.655904	-6.35324
x00527			unannotated	-0.175264	-0.61914	0.268611	23.1231	-0.811659	0.424362	0.59009	0.656423	-6.35643
x00677	Docosahexaenoic acid ethyl ester		2b	-0.440618	-1.56781	0.686573	20.644	-0.803539	0.428955	0.593534	0.659267	-6.36297
sl00068	3-Methyl-2-oxovaleric acid	HMDB0000491	2a	-0.1434	-0.511484	0.224684	25.167	-0.800839	0.430489	0.593534	0.659267	-6.36513
x00774			unannotated	0.106057	-0.166257	0.378371	22.6132	0.800595	0.430628	0.593534	0.659267	-6.36532
x00556	Diethyl phthalate		3	0.0858464	-0.137068	0.308761	23.4282	0.791635	0.435743	0.596466	0.661407	-6.37244
x01024	[Similar to: 2-[2-(2-propynylsulfanyl)phenyl]-1,4,5,6-tetrahydropyrimidine hydrobromide; ΔMass: 86.1485 Da]		unannotated	0.348943	-0.557911	1.2558	19.9221	0.790968	0.436125	0.596466	0.661407	-6.37297
x00130	[Similar to: 4-{[2-(4-fluorophenyl)-2-oxoethyl]amino}-4-oxobutanoic acid; ΔMass: -117.1731 Da]		unannotated	0.177367	-0.28403	0.638763	25.7886	0.790205	0.436562	0.596466	0.661407	-6.37357
x00504	3-(propan-2-yl)-octahydropyrrolo[1,2-a]pyrazine-1,4-dione		2b	-0.0826589	-0.302125	0.136807	23.6243	-0.774221	0.44579	0.607308	0.67262	-6.38606
sl00298	Octanoylcarnitine	HMDB0000791	2a	0.104493	-0.17521	0.384197	20.5649	0.767796	0.449503	0.609404	0.673449	-6.39104
x00338	Benserazide		3	0.0464741	-0.0780372	0.170986	24.742	0.767067	0.449921	0.609404	0.673449	-6.39161
sl00081	Anserine	HMDB0000194	2a	0.331442	-0.572367	1.23525	19.791	0.753829	0.457731	0.617697	0.67716	-6.40164
x01379			unannotated	0.0782232	-0.135498	0.291945	20.5193	0.752174	0.458673	0.617697	0.67716	-6.40292
x00035	[Similar to: 1,10-Diamino-4,7-dioxadecane; ΔMass: -13.0316 Da]		unannotated	0.0799128	-0.142362	0.302187	28.8081	0.739042	0.466508	0.626453	0.683048	-6.41268
x00353	L-Ascorbic acid 2-sulfate		2b	-0.146599	-0.556726	0.263529	23.873	-0.734773	0.469059	0.628085	0.685717	-6.41583
x00515			unannotated	0.0448088	-0.0811394	0.170757	23.8159	0.731143	0.471202	0.628379	0.686713	-6.41854
x00653	HIL		3	-0.112183	-0.428103	0.203737	22.7492	-0.72995	0.471953	0.628379	0.686742	-6.41937
x00228	[Similar to: 3-[4,8,11-tri(2-cyanoethyl)-1,4,8,11-tetraazacyclotetradecanyl]propanenitrile; ΔMass: -259.1797 Da]		unannotated	0.0787543	-0.14529	0.302799	25.6637	0.722574	0.476397	0.632504	0.690005	-6.42474
x01351			unannotated	0.0483107	-0.0900908	0.186712	20.6894	0.717354	0.479523	0.634862	0.691979	-6.42855
x01179	2-Phenylcyclopropanamine		3	0.0747306	-0.142634	0.292096	21.298	0.706582	0.48609	0.641748	0.698662	-6.43623
x00309	Uridine	HMDB0000296	2a	0.0688131	-0.132699	0.270325	21.3608	0.701781	0.489024	0.643813	0.701805	-6.43963
x00672	Hexanoylcarnitine		2b	0.110358	-0.214517	0.435233	22.4883	0.698278	0.491207	0.644881	0.702793	-6.44205
x01085	4,4'-Bipyridine		2b	-0.0486211	-0.194358	0.0971161	21.6313	-0.685623	0.498993	0.653277	0.706405	-6.45088
x01137	Glyphosate		3	0.158871	-0.319292	0.637034	20.9208	0.682983	0.500664	0.653644	0.707705	-6.45266
sl00189	Creatine	HMDB0000064	1	0.089792	-0.182135	0.361719	28.853	0.678777	0.503282	0.65505	0.710338	-6.45553
x00963			unannotated	0.0712019	-0.145047	0.287451	22.0819	0.67676	0.504528	0.65505	0.711029	-6.45692
x00538			unannotated	-0.0518614	-0.21188	0.108157	23.8517	-0.666111	0.511194	0.661877	0.716129	-6.46412
x01387			unannotated	0.0649219	-0.1409	0.270744	20.4578	0.648231	0.522495	0.67465	0.724875	-6.47594
x00574	N-Acetylvaline		3	0.0441551	-0.100659	0.188969	23.4008	0.626615	0.536351	0.690644	0.734942	-6.48981
sl00292	N-Acetyl-glycine	HMDB0000532	1	0.065384	-0.151422	0.28219	21.4915	0.619821	0.540756	0.694413	0.738823	-6.49407
x00493	(8S,9S)-6-[(2R)-1-hydroxypropan-2-yl]-8-methyl-9-[[methyl(pyridin-4-ylmethyl)amino]methyl]-10-oxa-1,6,14,15-tetrazabicyclo[10.3.0]pentadeca-12,14-dien-5-one		3	-0.199033	-0.863145	0.46508	22.2816	-0.616062	0.543214	0.69567	0.740031	-6.49639
x00742	9-methylhypoxanthine		3	-0.0461487	-0.202325	0.110028	22.8219	-0.607262	0.548922	0.699998	0.745452	-6.50184
x01198	Glutaric acid	HMDB0000661	2a	-0.106924	-0.469437	0.255589	20.6834	-0.606308	0.549573	0.699998	0.745452	-6.5024
sl00076	4-Methyl-2-oxovaleric acid	HMDB0000695	2a	-0.0822887	-0.370297	0.20572	26.096	-0.587323	0.562057	0.712138	0.752715	-6.51383
x00780			unannotated	0.506094	-1.26557	2.27776	21.4412	0.587207	0.562134	0.712138	0.752715	-6.5139
sl00003	2-Oxoglutaric acid	HMDB0000208	2a	-0.0911036	-0.41167	0.229463	22.7854	-0.584197	0.564127	0.712741	0.753238	-6.51568
x01018	Glyceric acid	HMDB0000139	1	-0.0800294	-0.366378	0.206319	21.6368	-0.574508	0.570566	0.718944	0.759677	-6.52134
x01160			unannotated	0.0802383	-0.208607	0.369084	21.165	0.571029	0.572887	0.719938	0.760332	-6.52335
x00357	D-Mannoheptulose		3	-0.109598	-0.505755	0.286558	24.2716	-0.568695	0.574447	0.719974	0.760332	-6.5247
x00328	2,2,6,6-Tetramethyl-4-piperidinol		2b	0.306558	-0.821838	1.43495	22.1246	0.558462	0.581311	0.726639	0.766695	-6.53052
x01173	N(4)-phosphoagmatine		3	-0.0716328	-0.3394	0.196134	21.1458	-0.549912	0.587076	0.730162	0.768444	-6.53531
x00407			unannotated	0.0385462	-0.105582	0.182675	24.3553	0.549647	0.587236	0.730162	0.768444	-6.53548
sl00083	Pentose		2a	0.0450529	-0.125099	0.215205	22.0838	0.544148	0.590956	0.732847	0.769388	-6.53852
x00136	N,N,4-Trimethylaniline		2b	0.0565286	-0.158735	0.271792	26.7038	0.539808	0.593927	0.734594	0.771121	-6.54088
x00004	Carnitine	HMDB0000062	1	0.0352457	-0.100139	0.170631	30.7313	0.535045	0.597151	0.736643	0.774237	-6.54349
sl00166	a/b/ω-Muricholic acid		2a	-0.239494	-1.16604	0.687054	17.8955	-0.532374	0.599172	0.737201	0.77472	-6.52658
x00593	1-(4-Nitrophenyl)ethanone		3	0.0898223	-0.264329	0.443973	21.1503	0.52136	0.606532	0.74275	0.78316	-6.55078
x01262	2-Oxindole		2b	-0.182322	-0.903895	0.539251	19.8082	-0.519399	0.60788	0.74275	0.783448	-6.55181
x00489	2-Hydroxyquinoline		2b	0.147146	-0.436096	0.730387	22.7657	0.51861	0.608423	0.74275	0.783448	-6.55223
x00555	Dobesilic acid		3	0.18771	-0.581881	0.9573	22.6608	0.501383	0.620324	0.755317	0.792262	-6.56112
x00379	Biacetyl		3	0.052169	-0.164305	0.268643	23.4863	0.495393	0.624488	0.758422	0.796497	-6.56415
x00315			unannotated	0.110844	-0.355552	0.577239	24.0479	0.488538	0.629268	0.762257	0.798533	-6.56756
x00074			unannotated	-0.0336954	-0.176819	0.109429	27.753	-0.483873	0.632517	0.762437	0.799329	-6.56987
sl00286	Melatonin	HMDB0001389	2a	0.104474	-0.33953	0.548478	20.4615	0.483686	0.632661	0.762437	0.799329	-6.56995
x01342	2-Hydroxy-4-(methylthio)butanoic acid		3	0.318993	-1.05034	1.68833	17.9506	0.478867	0.63604	0.764549	0.800238	-6.5723
x00208	Methionine sulfoxide	HMDB0002005	2a	-0.117082	-0.632852	0.398687	18.9479	-0.466635	0.644651	0.772924	0.80217	-6.57817
x00649	(2S)-5-(Carbamoylamino)-2-[(3-carboxylatopropanoyl)amino]pentanoate		3	0.0406546	-0.142343	0.223652	23.205	0.456653	0.651712	0.779402	0.807127	-6.58284
x00657	4-Methyl-N-(4-pyridinylmethyl)benzenesulfonamide		3	0.042026	-0.149305	0.233357	22.914	0.451505	0.65537	0.780101	0.810589	-6.58521
x01303	[Similar to: 4-{[2-(4-fluorophenyl)-2-oxoethyl]amino}-4-oxobutanoic acid; ΔMass: -36.9946 Da]		unannotated	-0.247956	-1.38173	0.88582	17.5522	-0.449561	0.656756	0.780101	0.810814	-6.5861
x01196			unannotated	-0.0827709	-0.461858	0.296316	20.6049	-0.448829	0.657277	0.780101	0.810814	-6.58643
x00726	[Similar to: 1-(3-{[(4-Hydroxypyrimidin-2-yl)thio]methyl}-4-methoxyphenyl)ethan-1-one; ΔMass: -7.1007 Da]		unannotated	0.0477339	-0.173055	0.268523	22.7364	0.444418	0.660421	0.781858	0.813624	-6.58843
sl00108	Glycocholic acid	HMDB0000138	2a	0.203746	-0.761096	1.16859	17.9045	0.434085	0.667811	0.787285	0.820342	-6.59304
x00358	indoline-2-carboxylic acid		2b	0.0984231	-0.368682	0.565528	24.0278	0.433136	0.668491	0.787285	0.820342	-6.59346
x00254			unannotated	-0.0321642	-0.185553	0.121225	25.6221	-0.430975	0.67003	0.787285	0.821158	-6.59442
x00533	galegine		3	0.0486306	-0.185557	0.282818	23.777	0.426863	0.672996	0.788682	0.821289	-6.5962
x01171	5-Methoxy-1H-indol-6-yl Î²-D-glucopyranosiduronic acid		3	0.295045	-1.13999	1.73008	19.791	0.422638	0.676037	0.788682	0.821289	-6.59802
sl00012	Citrulline	HMDB0000904	1	0.0284356	-0.109939	0.166811	23.8675	0.422314	0.676253	0.788682	0.821289	-6.59817
x01064	6-Methylquinoline		2b	-0.0263813	-0.164806	0.112043	21.7533	-0.391665	0.698484	0.809818	0.836615	-6.61085
x00405	[Similar to: N-(2-hydroxyethyl)-N'-propylthiourea; ΔMass: 41.8899 Da]		unannotated	-0.120367	-0.75374	0.513006	22.7472	-0.390652	0.69924	0.809818	0.836615	-6.61124
sl00278	Homocysteine	HMDB0000742	2a	0.0613034	-0.261557	0.384164	18.8583	0.390212	0.699545	0.809818	0.836615	-6.61143
x00331			unannotated	0.0330761	-0.143401	0.209553	24.9582	0.385273	0.703172	0.812017	0.837746	-6.61336
x00413	4-(2-Methoxyphenoxy)-N-(3-pyridinyl)benzenesulfonamide		3	-0.0329153	-0.210764	0.144934	21.8232	-0.380345	0.706766	0.813654	0.839898	-6.61529
x01115	Isatin		3	0.0871956	-0.386219	0.56061	20.9037	0.378613	0.708052	0.813654	0.840365	-6.61595
x00456	ARECOLINE		3	0.0297338	-0.136849	0.196317	23.9636	0.366897	0.716665	0.818702	0.844319	-6.62039
x00801	[Similar to: 1-[(2-chlorophenyl)sulfonyl]-3-methyl-4-(2-methylallyl)-4,5-dihydro-1H-pyrazol-5-one; ΔMass: 34.1480 Da]		unannotated	0.161397	-0.744466	1.06726	20.0309	0.366248	0.717146	0.818702	0.844319	-6.62063
x00835	1,2-Cyclohexanediamine		3	0.0422709	-0.195442	0.279984	22.4697	0.365536	0.717671	0.818702	0.844319	-6.62089
x00831	[Similar to: N-[2-(1,5-dimethyl-4-nitro-1H-pyrazol-3-yl)vinyl]-N,N-dimethylamine; ΔMass: -42.9694 Da]		unannotated	0.0421886	-0.197136	0.281514	22.5089	0.362367	0.720009	0.819381	0.846011	-6.62207
x01248	(2S)-2-amino-N'-[(4-methyl-2,6-dioxo-5-pyrimidinylidene)methyl]-3-phenylpropanehydrazide		3	-0.0907344	-0.613597	0.432129	20.4655	-0.356719	0.724184	0.822105	0.847636	-6.62413
x01107	[Similar to: 4-{[2-(4-fluorophenyl)-2-oxoethyl]amino}-4-oxobutanoic acid; ΔMass: -23.0869 Da]		unannotated	-0.102178	-0.694843	0.490486	20.6226	-0.354398	0.725901	0.822105	0.847636	-6.62497
x01067			unannotated	-0.0445206	-0.311103	0.222061	21.5365	-0.343298	0.734137	0.829433	0.855128	-6.62892
sl00290	N-Acetyl-aspartic acid	HMDB0000812	2a	0.119953	-0.606894	0.846801	19.445	0.339243	0.737154	0.830845	0.855462	-6.63032
x01396	[Similar to: 4-{[2-(4-fluorophenyl)-2-oxoethyl]amino}-4-oxobutanoic acid; ΔMass: 11.9292 Da]		unannotated	0.0596701	-0.32437	0.443711	19.6831	0.319355	0.752006	0.842864	0.861435	-6.637
x00024			unannotated	0.0588016	-0.321397	0.439	29.6163	0.317922	0.753086	0.842864	0.861435	-6.63746
x01016	Ethyl L-methioninate		3	0.061171	-0.334534	0.456876	21.0442	0.317773	0.753198	0.842864	0.861435	-6.63751
x00486	4-Phenolsulfonic acid		2b	-0.109948	-0.826992	0.607097	22.4318	-0.315196	0.755131	0.84302	0.861435	-6.63834
sl00138	N-Acetyl-tyrosine	HMDB0000866	2a	-0.0699167	-0.530813	0.39098	17.9676	-0.311751	0.757705	0.843889	0.86212	-6.63945
x01234	N-(4,5-dimethyl-2-thiazolyl)cyclohexanecarboxamide		3	0.0843695	-0.487214	0.655953	20.4883	0.303423	0.763985	0.847252	0.86212	-6.64205
sl00038	Succinic acid	HMDB0000254	2a	0.0400414	-0.237363	0.317446	22.6399	0.296714	0.769044	0.847252	0.865445	-6.6441
x00240	BAP		3	-0.0246084	-0.195589	0.146373	25.523	-0.295854	0.769694	0.847252	0.865445	-6.64436
x00072	Urea	HMDB0000294	2a	0.0293653	-0.17553	0.23426	27.3812	0.294608	0.770635	0.847252	0.865468	-6.64474
sl00143	Rhamnose	HMDB0000849	2a	-0.0810723	-0.650521	0.488377	20.7565	-0.292658	0.772109	0.847252	0.865894	-6.64532
x00408			unannotated	0.0268717	-0.163265	0.217008	24.3757	0.290516	0.773728	0.847252	0.865894	-6.64596
sl00224	1-Methyl Adenosine	HMDB0003331	1	-0.0181884	-0.148318	0.111941	21.9434	-0.287242	0.776194	0.847252	0.866348	-6.64693
x00638	triazacyclononane		3	0.0334886	-0.206634	0.273611	23.1175	0.286686	0.776627	0.847252	0.866348	-6.64708
x01175			unannotated	0.0285466	-0.176403	0.233496	21.3541	0.286246	0.776948	0.847252	0.866348	-6.64722
sl00247	5-Methylcytosine	HMDB0002894	2a	-0.0640997	-0.54481	0.416611	20.308	-0.274103	0.786173	0.855094	0.871465	-6.65068
x01273	Menadione bisulfite		3	0.0815255	-0.534613	0.697664	20.3658	0.271993	0.787778	0.855094	0.872216	-6.65127
sl00125	3-Indoxylsulfuric acid	HMDB0000682	1	-0.0679904	-0.588866	0.452885	22.7226	-0.268322	0.790571	0.856148	0.873251	-6.65228
x01263			unannotated	-0.0352163	-0.31466	0.244228	20.95	-0.259047	0.79764	0.861817	0.878993	-6.65477
sl00215	Thiamine	HMDB0000235	1	-0.0222618	-0.202106	0.157583	23.5087	-0.254448	0.801153	0.863483	0.881831	-6.65598
sl00308	Sugar alcohol (C6)		2a	0.0478815	-0.34228	0.438043	19.0815	0.252208	0.802855	0.863483	0.882671	-6.65656
x00821	cis-4-Decenoyl carnitine		3	0.0405309	-0.294692	0.375754	21.6761	0.248539	0.805672	0.864534	0.884733	-6.65749
sl00135	N-acetyl-methionine	HMDB0011745	2a	-0.0276879	-0.269984	0.214608	18.7242	-0.234842	0.816163	0.873797	0.893124	-6.66088
x01225	[Similar to: L-Ergothioneine; ΔMass: -16.9857 Da]		unannotated	-0.0221332	-0.227047	0.182781	21.0706	-0.221975	0.82606	0.882382	0.898723	-6.66388
sl00001	2-(hydroxymethyl)butanoic/2-Ethylhydracrylic acid		2a	0.0322033	-0.273644	0.33805	21.7236	0.216441	0.830335	0.883149	0.901182	-6.66511
x00147			unannotated	-0.0739077	-0.779476	0.631661	24.953	-0.215324	0.831196	0.883149	0.901182	-6.66536
x00119	2-Oxobutyric acid		3	0.0184379	-0.158882	0.195758	27.0395	0.213745	0.832414	0.883149	0.901463	-6.6657
x00422			unannotated	0.085699	-0.784265	0.955663	21.8144	0.202496	0.841107	0.890361	0.908782	-6.66809
x00828	Benzoyl cyanide		3	-0.0464106	-0.531342	0.438521	21.7403	-0.196734	0.845567	0.893071	0.90942	-6.66927
x01141	1-(2,1,3-benzoxadiazol-4-yloxy)-3,3-dimethyl-1-(1,2,4-triazol-1-yl)-2-butanone		3	-0.147796	-1.73048	1.43489	18.4563	-0.19196	0.849266	0.894967	0.912336	-6.67021
x00277			unannotated	0.00932305	-0.0964721	0.115118	25.4252	0.181102	0.857686	0.899393	0.918834	-6.67229
x00266	3-Methylhistidine	HMDB0000479	1	-0.0188115	-0.233893	0.19627	25.1723	-0.179789	0.858713	0.899393	0.918834	-6.67252
x00505	2-Oxindole		2b	-0.0476738	-0.594686	0.499339	22.8847	-0.179153	0.859207	0.899393	0.918834	-6.67264
x00744			unannotated	0.0323191	-0.344091	0.408729	19.2699	0.176461	0.861295	0.899574	0.9192	-6.67313
x01054	Fluorodopa		3	-0.057522	-0.743312	0.628268	20.3482	-0.172419	0.864445	0.900163	0.920247	-6.67385
x00641			unannotated	0.0215774	-0.238028	0.281183	18.997	0.170811	0.865689	0.900163	0.920529	-6.67414
x01288	[Similar to: 1,3-dimethyl-5-(morpholinosulfonyl)indolin-2-one; ΔMass: -67.0786 Da]		unannotated	0.117561	-1.40622	1.64134	19.0341	0.158593	0.875216	0.908061	0.926467	-6.67619
x00889			unannotated	0.0180016	-0.226901	0.262904	21.7369	0.151098	0.881066	0.912116	0.930564	-6.67737
x01041			unannotated	0.0115255	-0.181822	0.204873	18.9031	0.122505	0.903437	0.933221	0.947802	-6.68137
x00771	[Similar to: Methyl 2-[2,6-dioxo-4-(3,4,5-trimethoxyphenyl)piperidino]-4,5-dimethoxybenzoate; ΔMass: -205.2150 Da]		unannotated	0.0148941	-0.261899	0.291687	22.1572	0.110611	0.912775	0.940097	0.955157	-6.68279
x01281	N-(2-oxolanylmethyl)-1-phenyl-4-pyrazolo[3,4-d]pyrimidinamine		3	-0.0261218	-0.519062	0.466819	19.5385	-0.108931	0.914094	0.940097	0.955157	-6.68298
sl00157	Thymidine	HMDB0000273	2a	-0.0102692	-0.21413	0.193591	18.6723	-0.103522	0.918339	0.942401	0.957028	-6.68357
x00372	acetylspermine		3	0.00660932	-0.16017	0.173389	18.0416	0.0814412	0.935712	0.955045	0.968674	-6.68565
x00924	convicine		3	-0.00869466	-0.234076	0.216687	18.7986	-0.0792804	0.937414	0.955045	0.968674	-6.68583
x00307	g-Butyrobetaine		3	-0.0187005	-0.505281	0.46788	23.8853	-0.0790023	0.937636	0.955045	0.968674	-6.68585
x00810	N-Benzylformamide		2b	0.00522773	-0.133335	0.143791	22.607	0.0775348	0.938789	0.955045	0.968674	-6.68597
x01237	2-Oxoglutarate dianion		3	0.014733	-0.430397	0.459863	20.4874	0.0680372	0.946277	0.960584	0.970011	-6.68668
sl00194	Glycine	HMDB0000123	2a	-0.00505475	-0.168674	0.158564	21.8917	-0.0634887	0.949861	0.962143	0.97197	-6.68698
x01418	validamine 7-phosphate		3	-0.00646284	-0.349804	0.336878	18.903	-0.0386837	0.969437	0.979861	0.984093	-6.68828
x00163	Methyl Î²-D-glucuronide		3	-0.00287264	-0.227405	0.22166	26.5562	-0.0262993	0.97922	0.987625	0.989852	-6.68869
x01056	[Similar to: 3-hydroxy-2-(3-nitro-4-piperidinobenzyl)propanenitrile; ΔMass: -130.0547 Da]		unannotated	0.0012124	-0.137196	0.13962	21.8372	0.0180017	0.985774	0.99049	0.992729	-6.68888
x01176	1-Phenyl-1H-pyrazolo[3,4-d]pyrimidin-4-amine		3	0.00222313	-0.263459	0.267905	18.4196	0.0171963	0.986411	0.99049	0.992729	-6.68889
x01065			unannotated	-0.00220579	-0.310568	0.306156	18.2849	-0.0147006	0.988383	0.99049	0.992729	-6.68893
sl00091	Cholic acid	HMDB0000619	1	-0.000754905	-0.641664	0.640154	22.0179	-0.00242124	0.998087	0.998087	0.998087	-6.68904

## Sheet: sheet_4
protein_ids	gene_symbol	log_fc	ci_l	ci_r	ave_expr	t	p_value	adj_p_val	global_adj_p_val	b
D3ZHY9	Rasal1	-0.579425	-0.804436	-0.354415	19.2409	-5.13903	2.53988e-06	0.00504929	0.00216398	4.42313
P20156	Vgf	0.570662	0.316316	0.825007	17.7822	4.47756	2.97724e-05	0.0180653	0.00910577	2.2598
A0A0G2JTL4	Kit	-0.789814	-1.14246	-0.437169	16.6917	-4.47616	3.27832e-05	0.0180653	0.00977596	2.15566
P0DMW1	Hspa1a	0.83216	0.456611	1.20771	17.1599	4.42209	3.63488e-05	0.0180653	0.0105748	2.08475
P21708	Mapk3	-0.415439	-0.607658	-0.223219	18.2927	-4.31317	5.36027e-05	0.0213124	0.0148691	1.7443
Q64542-3	Atp2b4	-1.04753	-1.54052	-0.554535	19.3275	-4.24044	6.92929e-05	0.022959	0.0165305	1.51947
F1M7X3	Cdh13	-0.494815	-0.741877	-0.247753	19.0778	-3.9969	0.000161106	0.0446601	0.0301284	0.782045
F1LM19	Ahsg	-0.679993	-1.02226	-0.337722	18.2328	-3.96479	0.000179719	0.0446601	0.0315248	0.686674
D3ZB78	RGD1559864	-0.303006	-0.465974	-0.140038	19.4571	-3.71053	0.000419989	0.0886068	0.053867	-0.0519859
Q9ESB5	Necab1	0.566116	0.258518	0.873714	17.5326	3.676	0.000483585	0.0886068	0.0576821	-0.171626
P08050	Gja1	-0.328917	-0.508886	-0.148949	20.5966	-3.64735	0.000516108	0.0886068	0.058294	-0.230768
Q66HA8	Hsph1	0.19847	0.0891433	0.307796	19.4464	3.6229	0.000558671	0.0886068	0.0609059	-0.299446
D3Z8I7	Gstt3	-0.422922	-0.659211	-0.186634	18.3127	-3.57194	0.000658331	0.0886068	0.0682832	-0.441583
P10818	Cox6a1	-0.323485	-0.504819	-0.142151	21.6583	-3.56009	0.000683837	0.0886068	0.0697163	-0.474473
A0A0G2JY22		-0.735427	-1.14866	-0.322192	17.4143	-3.55261	0.000706129	0.0886068	0.0705184	-0.501056
Q6PCT3	Tpd52l2	0.976914	0.427265	1.52656	16.2131	3.54697	0.000713133	0.0886068	0.0705184	-0.510759
G3V964	Ntm	-0.346544	-0.543782	-0.149307	19.5511	-3.50635	0.000811643	0.090249	0.0730603	-0.622609
P49242	Rps3a	0.296745	0.12709	0.466399	18.4284	3.49062	0.000853147	0.090249	0.0734885	-0.665687
Q6IMX8	Acot2	-0.630295	-0.991005	-0.269585	16.6711	-3.48716	0.000862541	0.090249	0.0734885	-0.675144
F1M7S3	Pdyn	-1.17079	-1.84399	-0.497589	17.252	-3.47168	0.000912688	0.0907212	0.0750796	-0.7214
Q6MG60	Ddah2	-0.234269	-0.375087	-0.0934512	19.9365	-3.32004	0.00145296	0.137547	0.0932708	-1.12442
D3ZDT1	Epb41l2	-0.25299	-0.410127	-0.0958541	20.4238	-3.21302	0.00201284	0.181887	0.108835	-1.40406
P28037	Aldh1l1	-0.354821	-0.577809	-0.131833	17.9274	-3.17552	0.00225299	0.194737	0.116635	-1.50052
Q6PCT9	Psmd6	-0.331566	-0.544043	-0.119088	18.4659	-3.11418	0.00270436	0.220056	0.125535	-1.65652
D3Z9H2	Hapln4	0.290668	0.103932	0.477403	19.476	3.1064	0.0027673	0.220056	0.127445	-1.67615
Q08602	Rabggta	-0.391467	-0.6443	-0.138635	17.4864	-3.08994	0.00290497	0.222118	0.130305	-1.71755
P11730	Camk2g	-0.34727	-0.572896	-0.121643	19.517	-3.07159	0.00306599	0.225748	0.133386	-1.76353
D3ZPC4	L1cam	-0.324377	-0.537603	-0.111152	18.079	-3.03598	0.00340245	0.228736	0.139565	-1.85217
A0A0G2JXA8	Flot2	-0.453258	-0.751668	-0.154848	17.7327	-3.03123	0.00344987	0.228736	0.139565	-1.86394
A0A0G2K401	Pcca	-0.302832	-0.502219	-0.103445	17.6388	-3.03104	0.00345176	0.228736	0.139565	-1.8644
P14046	A1i3	-0.726576	-1.20767	-0.245479	18.6287	-3.01394	0.00362758	0.232633	0.140944	-1.90664
D3ZXL9	Kctd4	-0.411503	-0.68563	-0.137376	16.7724	-2.99577	0.0038236	0.236463	0.145248	-1.95135
G3V8J5	Psd	-0.390203	-0.650932	-0.129475	17.1337	-2.98668	0.00392519	0.236463	0.14791	-1.97362
Q00959	Grin2a	0.338626	0.110853	0.566399	17.7416	2.96692	0.004155	0.242945	0.152027	-2.0219
B2GV06	Oxct1	-0.236015	-0.401003	-0.0710274	19.467	-2.85479	0.00571216	0.286716	0.169912	-2.29116
P10860	Glud1	-0.17185	-0.292379	-0.0513219	21.6116	-2.84543	0.00586405	0.286716	0.171437	-2.3133
Q64057	Aldh7a1	-0.343082	-0.583994	-0.102169	18.4819	-2.84201	0.00592046	0.286716	0.171755	-2.32137
Q921A2	Slc2a13	0.434864	0.129326	0.740402	18.1332	2.84037	0.00594764	0.286716	0.171776	-2.32523
P12346	Tf	-0.430914	-0.733799	-0.12803	18.6566	-2.83923	0.00596659	0.286716	0.171907	-2.32791
Q8R491	Ehd3	-0.164158	-0.279717	-0.0485992	19.3901	-2.83495	0.00603831	0.286716	0.172831	-2.33799
F1LQI4	Acan	0.863308	0.255568	1.47105	16.9705	2.83728	0.00607111	0.286716	0.172831	-2.33971
D3ZQD3	Ogdhl	-0.593133	-1.01183	-0.174436	17.9591	-2.82709	0.00617226	0.286716	0.174462	-2.35648
Q68FR6	Eef1g	0.19209	0.0564108	0.32777	19.5624	2.82539	0.00620159	0.286716	0.174649	-2.36047
P31424	Grm5	-0.535602	-0.916597	-0.154608	17.6039	-2.8055	0.00655415	0.296128	0.180415	-2.40703
Q9QYU4	Crym	-0.214842	-0.368687	-0.0609969	21.7907	-2.7869	0.0069004	0.304844	0.183314	-2.45033
A0A0G2KB58	Cdc42bpb	-0.383959	-0.660898	-0.107019	17.5437	-2.76685	0.00729254	0.314443	0.186816	-2.49678
Q63622	Dlg2	-0.266278	-0.458824	-0.0737318	19.5516	-2.75986	0.00743401	0.314443	0.186816	-2.51292
Q5XI77	Anxa11	0.272782	0.0745498	0.471014	18.4067	2.74618	0.00771815	0.317441	0.188055	-2.5444
Q07009	Capn2	-0.48277	-0.83424	-0.1313	17.4387	-2.74118	0.00782426	0.317441	0.188055	-2.55585
P04762	Cat	-0.268919	-0.465757	-0.0720814	17.3708	-2.72647	0.00814498	0.323845	0.191624	-2.58953
A0A0G2K872	Cadm3	-0.207248	-0.361047	-0.0534493	19.8338	-2.68921	0.00901126	0.351263	0.200536	-2.67414
P07335	Ckb	-0.12236	-0.213453	-0.0312666	23.9252	-2.68065	0.00922181	0.352557	0.201742	-2.69345
A0A0A0MY13	Gpr158	-0.299142	-0.52314	-0.0751431	18.3456	-2.66513	0.00961499	0.354319	0.204413	-2.72833
A0A0G2JTN4	LOC100912917	-0.243879	-0.426797	-0.0609606	18.3372	-2.66075	0.00972875	0.354319	0.204415	-2.73815
Q6PW34	Nrcam	-0.180859	-0.316654	-0.0450641	19.4653	-2.65793	0.00980258	0.354319	0.204415	-2.74446
P13668	Stmn1	-0.360528	-0.633792	-0.0872649	20.0233	-2.63296	0.0104791	0.372009	0.210784	-2.80013
A0A0G2JXN2		0.719384	0.172911	1.26586	18.2884	2.62934	0.0106791	0.372458	0.212656	-2.80474
A0A0H2UHV6	Ppp3r1	-0.49198	-0.869788	-0.114173	20.7448	-2.59874	0.0114753	0.393326	0.217681	-2.87573
B4F7C7	Hebp1	-0.464937	-0.824716	-0.105158	18.3882	-2.57896	0.0120898	0.406743	0.22192	-2.91908
A0A0G2K9L2		-0.278358	-0.494306	-0.0624112	18.8672	-2.57243	0.012299	0.406743	0.223292	-2.93333
Q9QXY2-2	Srcin1	-0.187952	-0.334452	-0.0414522	19.4681	-2.56033	0.0126953	0.406743	0.224756	-2.95965
G3V8G4	Bcan	-0.229044	-0.407591	-0.0504972	21.2764	-2.56008	0.0127038	0.406743	0.224756	-2.9602
Q6GMM8	Slc27a1	-0.395469	-0.70442	-0.0865185	17.8524	-2.55452	0.0128897	0.406743	0.226492	-2.97225
Q9WUS0	Ak4	-0.218589	-0.390222	-0.0469559	18.9964	-2.54164	0.0133305	0.41408	0.229116	-3.00013
M0RC17	Chl1	-0.304818	-0.544754	-0.0648812	16.8668	-2.53531	0.0135522	0.414488	0.231287	-3.01378
O35112	Alcam	0.22079	0.0450106	0.396569	18.6983	2.50668	0.0145962	0.439655	0.235243	-3.07518
B4F779	Appl2	-0.683074	-1.23129	-0.134855	16.9334	-2.49019	0.0154332	0.457929	0.239697	-3.10442
D3ZIE9	Aldh18a1	0.554719	0.106181	1.00326	17.2189	2.46809	0.0161179	0.467963	0.243561	-3.15704
F1LQJ7	Pck2	-0.264821	-0.479212	-0.0504296	17.7832	-2.46508	0.0162422	0.467963	0.243662	-3.16336
P63164	Snrpn	0.327525	0.060399	0.59465	17.6143	2.44689	0.0170131	0.477789	0.247799	-3.20155
A0A0G2JVL6		-0.286474	-0.520308	-0.0526392	19.9053	-2.44491	0.0170991	0.477789	0.248214	-3.2057
P63322	Rala	0.848887	0.154722	1.54305	18.0429	2.44114	0.0173042	0.477789	0.249583	-3.21474
P54311	Gnb1	-0.167616	-0.305793	-0.0294402	22.5649	-2.42086	0.0181734	0.491504	0.25413	-3.25579
P31044	Pebp1	-0.289801	-0.528963	-0.050639	21.7536	-2.41821	0.0182954	0.491504	0.254939	-3.26129
F1M4R7	Cspg5	-0.428955	-0.785107	-0.0728042	18.1978	-2.40361	0.0189808	0.503117	0.257276	-3.29147
Q68FR9-2	Eef1d	0.376228	0.0627148	0.689741	19.1118	2.39487	0.0194021	0.507518	0.258238	-3.30947
F1LQI1	Hagh	-0.228579	-0.419731	-0.0374268	18.6836	-2.3864	0.0198181	0.511668	0.261342	-3.32685
F1LS86	Iars	0.409775	0.0659406	0.753609	16.5837	2.37971	0.0202409	0.515883	0.263286	-3.3427
F1LNT0	Dpysl4	-0.173217	-0.319315	-0.0271178	20.3332	-2.36608	0.0208492	0.520059	0.26384	-3.36836
Q09073	Slc25a5	0.283627	0.0441497	0.523105	20.4952	2.36358	0.0209795	0.520059	0.26384	-3.37345
P50475	Aars	-0.206183	-0.380925	-0.0314416	18.5311	-2.35474	0.021445	0.520059	0.267366	-3.39139
Q9JLA3	Uggt1	0.453066	0.0690705	0.837061	17.7397	2.35463	0.0214511	0.520059	0.267366	-3.39163
G3V9G4	Acly	0.128999	0.0185587	0.239438	19.1531	2.33102	0.0227409	0.541827	0.271928	-3.43928
P03994	Hapln1	-0.256402	-0.476557	-0.0362481	20.2719	-2.32424	0.0231235	0.541827	0.272885	-3.45288
A0A0G2JYC6	Ubap2l	0.402825	0.0560817	0.749569	17.244	2.3204	0.0234868	0.541827	0.272885	-3.46348
G3V6R5	Suox	0.666436	0.0918487	1.24102	16.9301	2.31467	0.023674	0.541827	0.272885	-3.47205
P97710	Sirpa	-0.210902	-0.392789	-0.0290156	20.1225	-2.31402	0.0237117	0.541827	0.272885	-3.47334
P55067	Ncan	-0.204721	-0.382072	-0.027371	19.9979	-2.30366	0.0243215	0.549445	0.274463	-3.49401
D4A830	Ppa2	-0.278565	-0.520572	-0.0365574	17.9606	-2.29712	0.024713	0.552017	0.2767	-3.507
P27867	Sord	-0.7709	-1.44232	-0.0994782	16.8999	-2.29196	0.0250738	0.553852	0.278214	-3.51808
G3V960	Gamt	-0.437051	-0.81993	-0.054172	17.0204	-2.28063	0.0259287	0.563554	0.281152	-3.52831
O88767	Park7	-0.202133	-0.379474	-0.0247921	20.7058	-2.27465	0.0261026	0.563554	0.281512	-3.55143
B5DEY8	Snx6	-0.377022	-0.708398	-0.0456453	17.23	-2.27055	0.0263634	0.563554	0.283045	-3.55949
P02770	Alb	-0.361445	-0.68042	-0.0424693	21.0194	-2.26137	0.0269561	0.569571	0.28448	-3.57752
A0A0U1RVI9	Rps2	0.174187	0.0199957	0.328379	19.2124	2.25446	0.0274097	0.569571	0.286248	-3.59104
Q9ERB4-2	Vcan	-0.159588	-0.300946	-0.0182301	19.0226	-2.25303	0.0275044	0.569571	0.286324	-3.59383
P39069	Ak1	-0.624207	-1.17828	-0.0701368	19.5958	-2.24828	0.027821	0.570187	0.286324	-3.6031
Q9Z0G8	Wipf3	0.582243	0.0628784	1.10161	18.7669	2.23727	0.0285674	0.57951	0.289501	-3.62452
Q64548	Rtn1	-0.213229	-0.40387	-0.022587	19.9957	-2.2321	0.0289238	0.580813	0.290406	-3.63454
P09606	Glul	-0.1484	-0.28192	-0.01488	22.2339	-2.21807	0.0299118	0.592768	0.29299	-3.66167
A1L1J8	Rab5b	-0.231488	-0.440219	-0.0227575	19.2864	-2.21324	0.0302579	0.592768	0.294385	-3.67095
D3ZA84	Tln2	-0.195637	-0.37253	-0.0187438	18.0428	-2.20712	0.0307023	0.592768	0.296384	-3.68271
D4A8L9	Btbd17	-0.304969	-0.580735	-0.0292026	18.4243	-2.20699	0.0307118	0.592768	0.296384	-3.68296
F1LSR8	Cacna2d3	-0.242575	-0.462644	-0.0225055	17.6908	-2.19975	0.0312455	0.597269	0.298215	-3.69685
A0A0G2K654		0.4149	0.0374589	0.792342	20.5795	2.19372	0.0316957	0.600106	0.300291	-3.70837
F1LRI7	Aak1	-0.127009	-0.243638	-0.0103801	19.9799	-2.17328	0.0332649	0.621915	0.307823	-3.74725
B2GV79	Pdxp	-0.212895	-0.408882	-0.0169075	18.7255	-2.16782	0.0336948	0.621915	0.308946	-3.75756
P13221	Got1	0.244368	0.0189914	0.469745	22.852	2.16382	0.0340131	0.621915	0.310169	-3.76511
Q5HZA6-2	Prepl	-0.226234	-0.43499	-0.0174786	18.0759	-2.16275	0.034099	0.621915	0.310169	-3.76714
D3ZWX4	Nckipsd	-0.2286	-0.440476	-0.0167233	18.8983	-2.15318	0.0348736	0.624782	0.313812	-3.78516
Q4G064	Coq5	-0.535185	-1.03203	-0.0383441	16.9638	-2.15149	0.0351792	0.624782	0.315028	-3.79026
P24329	Tst	-0.178176	-0.344031	-0.0123202	19.6418	-2.1439	0.0356385	0.624782	0.316333	-3.80255
P32232-2	Cbs	-0.277443	-0.536313	-0.0185727	18.4568	-2.13884	0.0360622	0.624782	0.317714	-3.81202
Q5M9H7	Dnaja2	-0.520566	-1.00674	-0.034387	17.6201	-2.13681	0.0362331	0.624782	0.318254	-3.81581
D3ZVQ0	Usp5	-0.159098	-0.307772	-0.0104241	19.927	-2.13558	0.0363369	0.624782	0.318931	-3.8181
Q9JHL4-3	Dbnl	-0.159994	-0.309604	-0.0103844	19.5527	-2.13418	0.0364561	0.624782	0.319037	-3.82072
F7FG31	Ctbp1	-0.301899	-0.586545	-0.0172529	18.514	-2.11662	0.037974	0.63537	0.323688	-3.85334
F1LMH0	Sept3	-0.149803	-0.291058	-0.00854764	19.6895	-2.11642	0.0379915	0.63537	0.323688	-3.85371
Q641Z6	Ehd1	-0.244294	-0.474699	-0.0138883	18.8004	-2.11595	0.0380327	0.63537	0.323789	-3.85458
P70550	Rab8b	0.284894	0.013832	0.555956	18.047	2.0975	0.0396895	0.648099	0.332455	-3.88861
P05696	Prkca	-0.202325	-0.394927	-0.0097235	19.1353	-2.09641	0.0397888	0.648099	0.33282	-3.8906
F1LXA0	Ndufa12	-0.228488	-0.446427	-0.0105494	19.098	-2.09226	0.0401707	0.648099	0.333674	-3.89821
A0A0G2K7Y2	Oxr1	-0.141909	-0.277736	-0.00608184	19.3521	-2.08502	0.0408447	0.648099	0.336572	-3.91147
P0DP31	Calm2	-0.368387	-0.72101	-0.0157638	21.4992	-2.08488	0.0408581	0.648099	0.336572	-3.91173
P36201	Crip2	-0.239867	-0.46974	-0.00999465	19.1665	-2.08243	0.041088	0.648099	0.337998	-3.9162
A0A0G2JW28	Add3	-0.205387	-0.40238	-0.00839331	18.9184	-2.08069	0.0412522	0.648099	0.338433	-3.91937
Q62950	Crmp1	-0.12899	-0.25289	-0.00509057	21.32	-2.07765	0.04154	0.648099	0.339842	-3.9249
M0R9L2	Cntfr	-0.358647	-0.704492	-0.0128019	16.9107	-2.07068	0.0423254	0.648099	0.342508	-3.93844
B2GV74	Klc2	-0.323334	-0.635576	-0.0110921	17.5026	-2.06655	0.0426075	0.648099	0.343779	-3.94508
Q6IN22	Ctsb	-0.25859	-0.508319	-0.00886072	18.9401	-2.06647	0.0426158	0.648099	0.343779	-3.94523
D3ZZC1	Txndc5	0.472013	0.0155446	0.928481	16.6103	2.06418	0.0428965	0.648099	0.344327	-3.94988
Q5U3Y8	Btf3	-0.557133	-1.09648	-0.0177813	16.3094	-2.06511	0.0431247	0.648099	0.345165	-3.89088
A0A0G2K5X6	Ntrk2	0.67192	0.0206337	1.32321	18.2143	2.05889	0.0433587	0.648099	0.345576	-3.95896
P54313	Gnb2	-0.156967	-0.309811	-0.00412371	21.9258	-2.0495	0.0442934	0.657129	0.348526	-3.97588
Q68FS4-2	Lap3	-0.3913	-0.773248	-0.00935295	17.6739	-2.04453	0.044796	0.659662	0.350215	-3.98483
Q6P6R2	Dld	-0.164786	-0.326153	-0.003419	21.4285	-2.03794	0.0454688	0.664647	0.351383	-3.99664
F1LXD6	Pitpnm2	0.418074	0.00769608	0.828453	18.052	2.03309	0.0459707	0.666014	0.351383	-4.00533
M0RAP5	Sbf1	0.154168	0.00252321	0.305813	18.4787	2.02887	0.0464106	0.666014	0.352827	-4.01287
Q9Z2L0	Vdac1	0.229768	0.00359385	0.455943	21.2683	2.02737	0.0465674	0.666014	0.35284	-4.01554
O35987	Nsfl1c	-0.1464	-0.291109	-0.00169039	19.7715	-2.01897	0.0474562	0.673877	0.355139	-4.03048
D3ZCV0	Actn2	-0.299353	-0.596341	-0.00236408	18.485	-2.01155	0.0482542	0.676638	0.357359	-4.04366
Q60587	Hadhb	-0.224773	-0.447889	-0.00165745	18.4373	-2.01049	0.0483691	0.676638	0.357463	-4.04553
Q63798	Psme2	-0.370701	-0.739178	-0.00222448	17.5138	-2.00826	0.0486717	0.676638	0.358514	-4.02904
B0K008	Eif1	0.450533	0.00146099	0.899604	17.3891	2.00705	0.0492828	0.680308	0.360216	-4.02429
P60881	Snap25	-0.159447	-0.318827	-6.71497e-05	22.4763	-1.9965	0.0499063	0.680308	0.361501	-4.07021
F1LQ55	Scp2	-0.342397	-0.685864	0.00106975	18.5029	-1.98944	0.0506977	0.680308	0.364371	-4.08261
H1UBN0	Cpne7	-0.349949	-0.701078	0.00118037	20.1173	-1.98895	0.0507534	0.680308	0.364371	-4.08347
G3V6I1	Llgl1	-0.144783	-0.290309	0.000741791	17.0772	-1.98549	0.0511462	0.680308	0.365312	-4.08954
A0A096MIZ1	Palm2	0.194127	-0.00113599	0.38939	18.499	1.98405	0.0513099	0.680308	0.365459	-4.09206
Q62825	Exoc3	-0.541363	-1.08615	0.00342227	16.1302	-1.9854	0.0514132	0.680308	0.365459	-4.09143
F1M9N9	Ank2	-0.134585	-0.270367	0.00119724	20.2371	-1.97806	0.0519968	0.680308	0.366414	-4.10252
A0A0G2K7G7	Sept8	-0.129782	-0.2608	0.00123567	19.5905	-1.97684	0.0521383	0.680308	0.366414	-4.10465
P62909	Rps3	0.186533	-0.00222541	0.375292	18.8584	1.97213	0.0526851	0.680308	0.367932	-4.11285
Q5XIA5	Coasy	-0.607229	-1.22207	0.00761535	17.2842	-1.97509	0.0528147	0.680308	0.368406	-4.09101
A0A0G2K151	Apoe	-0.246158	-0.495832	0.00351566	20.4052	-1.96756	0.053221	0.680308	0.369726	-4.1208
F1LRB8	LOC100363915	0.372097	-0.0055878	0.749781	17.1097	1.9678	0.0533844	0.680308	0.370058	-4.1216
A0A0G2K189	Scrn3	-0.469904	-0.951126	0.0113181	17.654	-1.94981	0.055473	0.702422	0.377782	-4.13332
A0A0G2K1Q9	Epb41l3	-0.156102	-0.316929	0.00472486	19.3561	-1.93703	0.0569194	0.716175	0.381373	-4.17346
F1M2K6	Pkp4	-0.197495	-0.401576	0.00658535	18.1743	-1.93126	0.057642	0.716206	0.382827	-4.18332
Q8CFN2	Cdc42	-0.285031	-0.579567	0.00950453	19.5891	-1.93126	0.0576423	0.716206	0.382827	-4.18333
P47819	Gfap	0.21808	-0.00803728	0.444198	22.2163	1.92473	0.0584708	0.721987	0.385113	-4.19448
P15650	Acadl	-0.284142	-0.579933	0.0116485	18.6699	-1.91707	0.059454	0.72233	0.386739	-4.20749
D4A249	Mblac2	-0.908376	-1.85467	0.0379161	17.3053	-1.91849	0.0596094	0.72233	0.387477	-4.16332
Q9JKB7	Gda	-0.20288	-0.414842	0.00908144	20.5678	-1.91016	0.0603538	0.72233	0.3899	-4.21921
A0A0G2K0S7		-0.283886	-0.58087	0.0130986	17.1241	-1.90816	0.0606794	0.72233	0.390391	-4.22291
P18395	Csde1	0.260148	-0.0121982	0.532494	16.5284	1.90628	0.060864	0.72233	0.390966	-4.22577
P04897	Gnai2	-0.243289	-0.497994	0.0114163	20.2524	-1.90621	0.0608724	0.72233	0.390966	-4.22588
P04631	S100b	-0.336662	-0.689673	0.016349	22.5887	-1.90324	0.0612662	0.72233	0.391421	-4.2309
F1MAA5	Rangap1	0.402787	-0.0208147	0.826389	16.9798	1.8976	0.0620179	0.72233	0.39301	-4.24039
Q9WUC4	Atox1	-0.296908	-0.609247	0.0154316	17.1196	-1.89706	0.0620899	0.72233	0.393104	-4.24129
B5DEN5	Eef1b2	-0.305823	-0.627595	0.0159481	18.5211	-1.89675	0.062132	0.72233	0.393162	-4.24182
D4A4P3	LOC100361144	-0.325491	-0.668988	0.0180055	17.9367	-1.89157	0.0628952	0.726952	0.394564	-4.24382
Q63803	Gnas	-0.206924	-0.426026	0.0121779	18.67	-1.88474	0.063762	0.73152	0.396371	-4.26195
M0R5U4	Adcy9	0.278893	-0.0167151	0.5745	16.9403	1.88282	0.0640264	0.73152	0.396937	-4.26517
G3V826	Tkt	-0.119886	-0.24714	0.00736865	21.1475	-1.8801	0.0644011	0.731596	0.397813	-4.2697
G3V8P7	Rin1	0.262169	-0.017573	0.541911	16.3633	1.87081	0.0657633	0.740235	0.400474	-4.26493
A0A0H2UHT6	LOC100362298	0.240365	-0.0162439	0.496974	19.4089	1.86933	0.0659063	0.740235	0.400474	-4.28762
Q5XIT9	Mccc2	-0.182664	-0.378643	0.0133158	17.3531	-1.86007	0.0672246	0.742277	0.404039	-4.30296
Q6MFX9	Mog	-0.283772	-0.588533	0.0209891	20.1248	-1.85822	0.0674902	0.742277	0.404039	-4.30601
A0A0G2K0T5	Micu1	0.536688	-0.0407739	1.11415	17.5524	1.85526	0.0679833	0.742277	0.40475	-4.31117
A0A096MJN4	Sept4	-0.271555	-0.563752	0.020642	18.0537	-1.85468	0.0680013	0.742277	0.40475	-4.31185
Q68FT1	Coq9	-0.234582	-0.487705	0.0185419	17.8609	-1.84947	0.0687589	0.742277	0.406065	-4.32041
B0BNE6	Ndufs8	-0.159161	-0.331273	0.0129514	20.416	-1.84549	0.0693439	0.742277	0.406065	-4.32696
B5DFN2	Ahcyl1	-0.139464	-0.290368	0.0114391	19.5774	-1.84438	0.069507	0.742277	0.406065	-4.32877
P62250	Rps16	0.256939	-0.0210836	0.534961	19.1488	1.84432	0.0695158	0.742277	0.406065	-4.32887
A0A0G2K4B0	Gprc5b	-0.242769	-0.506024	0.0204858	18.7685	-1.84036	0.0701019	0.742277	0.406679	-4.33535
A0JN30	Cnpy2	-0.187489	-0.390955	0.0159778	17.8553	-1.83895	0.0703129	0.742277	0.406679	-4.33767
Q6AYT7	Abhd12	-0.2645	-0.551836	0.0228354	21.3121	-1.83706	0.0705944	0.742277	0.406679	-4.34076
D3ZMY7	Nt5c2	-0.300198	-0.626594	0.0261992	16.4082	-1.83597	0.0708229	0.742277	0.406729	-4.34279
Q6AYI1	Ddx5	0.142693	-0.0127076	0.298093	18.1649	1.83247	0.0712835	0.742277	0.407022	-4.34825
D3ZZM9	Ccsap	0.32797	-0.0294656	0.685405	17.8174	1.83115	0.0714831	0.742277	0.407591	-4.3504
P35465	Pak1	-0.290977	-0.608331	0.0263776	17.5343	-1.82979	0.0716887	0.742277	0.40794	-4.35262
Q6PDV8	Rpl22	0.39176	-0.0365298	0.82005	16.8185	1.82545	0.0723486	0.744827	0.408512	-4.35968
Q792I0	Lin7c	-0.745578	-1.56188	0.0707261	19.336	-1.82659	0.0726843	0.744827	0.409145	-4.33814
A0A096MJ90	Ly6h	-0.160538	-0.336978	0.0159012	20.2915	-1.81581	0.0738322	0.749717	0.411528	-4.3753
Q9R063-2	Prdx5	0.157818	-0.015802	0.331437	20.7495	1.81403	0.0741091	0.749717	0.411547	-4.37818
P53678	Ap3m2	0.29419	-0.0299007	0.61828	18.0033	1.81154	0.0744969	0.749717	0.412771	-4.38219
F1LT41	Vti1a	0.35922	-0.0370231	0.755464	17.1215	1.81127	0.0748189	0.749717	0.412925	-4.38352
G3V640	Timm44	-0.388355	-0.818301	0.0415911	16.1248	-1.80581	0.0758313	0.749717	0.414345	-4.32032
P07340	Atp1b1	0.172451	-0.0185552	0.363456	22.2933	1.80179	0.0760342	0.749717	0.415137	-4.39788
D3ZPT0	Prr36	-0.288242	-0.607538	0.0310533	17.1162	-1.80206	0.0760581	0.749717	0.415137	-4.37352
P62832	Rpl23	0.275932	-0.0298554	0.58172	19.799	1.80131	0.0761785	0.749717	0.415481	-4.39889
P97546	Nptn	-0.157886	-0.333788	0.018016	20.4328	-1.79126	0.0777245	0.751866	0.418365	-4.41474
Q5XIM5	Cdv3	-0.618061	-1.30784	0.0717226	18.1521	-1.78864	0.0782173	0.751866	0.41931	-4.41914
F1LMY3	Ptprz1	-0.142041	-0.300568	0.0164866	19.1701	-1.78811	0.0782362	0.751866	0.41931	-4.41977
Q5U2T9	Fkbp5	0.568883	-0.0667483	1.20451	16.4106	1.78709	0.0785406	0.751866	0.41931	-4.42185
Q8VHK2	Caskin1	-0.134823	-0.285509	0.0158634	18.3215	-1.78557	0.0786518	0.751866	0.41931	-4.42382
P62804	Hist1h4b	0.217405	-0.0255919	0.460401	21.5026	1.78548	0.078666	0.751866	0.41931	-4.42396
Q5RJL0	Ermn	-0.301573	-0.639694	0.0365486	17.075	-1.77994	0.0795768	0.756867	0.421488	-4.43277
P11030	Dbi	-0.502519	-1.06667	0.0616308	20.6101	-1.77764	0.0799574	0.756867	0.422754	-4.43642
A0A0G2K7W8	Hint3	-0.399446	-0.848896	0.050004	17.4812	-1.77513	0.080584	0.756867	0.424186	-4.44104
F1MAR6	Prodh	-0.761938	-1.62082	0.0969391	16.1722	-1.77244	0.0811069	0.756867	0.42548	-4.44534
P47875	Csrp1	-0.45774	-0.975324	0.0598442	18.7114	-1.7654	0.0820776	0.756867	0.428062	-4.45598
F1LM55	Ccar2	0.269803	-0.0363018	0.575908	17.5331	1.75899	0.0831017	0.756867	0.430225	-4.46587
B1WC25	Tra2a	0.628669	-0.0854199	1.34276	16.2676	1.7625	0.0832856	0.756867	0.430796	-4.41947
M0RAM5	Gpx1	0.728621	-0.100223	1.55747	17.2731	1.75583	0.0838543	0.756867	0.431939	-4.47137
Q6AXX6	Fam213a	-0.319615	-0.683709	0.0444784	17.5655	-1.75187	0.0843291	0.756867	0.431939	-4.47704
Q9QUH6	Syngap1	-0.117604	-0.251656	0.0164476	20.5988	-1.7508	0.0845139	0.756867	0.431939	-4.4787
A0A0G2K642	Acaa2	-0.41789	-0.894296	0.0585162	16.5123	-1.75101	0.0845449	0.756867	0.431939	-4.47856
F1LNY3	Ncam1	-0.184952	-0.396099	0.0261951	20.4668	-1.74808	0.0849881	0.756867	0.433037	-4.48296
P52555	Erp29	0.192439	-0.0273144	0.412193	19.2929	1.74761	0.08507	0.756867	0.433269	-4.48369
Q99MG9	Kcnip4	-0.304098	-0.651505	0.0433102	17.5072	-1.74941	0.085118	0.756867	0.433328	-4.45861
D3ZDH8	Sept5	-0.151835	-0.325288	0.0216169	20.0092	-1.74695	0.0851856	0.756867	0.433487	-4.48473
O88768	Adap1	-0.152756	-0.327314	0.0218023	17.9768	-1.7464	0.0852808	0.756867	0.433601	-4.48558
P27615	Scarb2	0.371566	-0.0544309	0.797563	16.6815	1.74214	0.0862401	0.758539	0.436168	-4.49275
F1LM47	Sucla2	0.163042	-0.0239443	0.350027	20.3038	1.74011	0.086388	0.758539	0.436256	-4.49539
F7EV94	Bckdha	-0.304242	-0.653848	0.0453641	17.0293	-1.73671	0.086991	0.758539	0.437633	-4.50067
A0A0G2JZ83		-0.144973	-0.311759	0.0218118	18.3231	-1.73467	0.0873537	0.758539	0.438412	-4.50383
P29419	Atp5i	-0.196453	-0.42248	0.029574	18.8493	-1.73454	0.0873769	0.758539	0.438412	-4.50403
B5DF65	Blvrb	-0.200932	-0.432733	0.030869	18.6663	-1.7299	0.0882093	0.758818	0.440322	-4.51123
G3V9Y1	Myh10	-0.0969082	-0.209067	0.0152511	19.2132	-1.7243	0.0892218	0.758818	0.442143	-4.51988
P23358	Rpl12	0.360521	-0.0572997	0.778342	17.8593	1.72198	0.089644	0.758818	0.443495	-4.52346
D3ZCZ9	LOC100912599	-0.210358	-0.454349	0.0336322	19.1832	-1.72057	0.0899	0.758818	0.443732	-4.52562
D3ZDB9	Nmral1	-0.246032	-0.531824	0.0397596	17.0654	-1.71802	0.0903673	0.758818	0.444502	-4.52955
G3V856	LOC100912512	-0.691967	-1.4961	0.112165	16.131	-1.71825	0.0904654	0.758818	0.444727	-4.51263
P17220	Psma2	-0.229982	-0.49779	0.0378265	18.3596	-1.71378	0.091148	0.758818	0.447045	-4.53606
Q5U2V8	Emc3	0.271209	-0.0449855	0.587403	17.2041	1.71268	0.091491	0.758818	0.447623	-4.53807
P17764	Acat1	-0.148417	-0.322002	0.0251687	21.0461	-1.7063	0.0925395	0.758818	0.448521	-4.54751
Q68FX9	Sirt5	-0.252338	-0.547748	0.0430712	18.3247	-1.70469	0.0928417	0.758818	0.448585	-4.54998
G3V7P8	Ndrg4	-0.362881	-0.787876	0.0621147	18.2893	-1.70399	0.0929737	0.758818	0.448585	-4.55105
A0A140TAA1		-0.155971	-0.338641	0.0266981	18.8852	-1.70398	0.0929743	0.758818	0.448585	-4.55106
A0A0G2K865	Tpd52	-0.180627	-0.392191	0.0309362	17.703	-1.70384	0.093001	0.758818	0.448585	-4.55127
A0A0G2JTH4	Cd47	0.390452	-0.0671116	0.848016	19.5394	1.70295	0.093168	0.758818	0.448832	-4.55263
P35815	Ppm1b	-0.332936	-0.723579	0.0577074	16.7477	-1.70132	0.093545	0.758818	0.449197	-4.55528
Q62952	Dpysl3	-0.153609	-0.334023	0.0268061	20.0118	-1.69914	0.0938872	0.758818	0.449754	-4.55843
D3ZC55	Hspa12a	-0.111406	-0.242342	0.0195299	20.2315	-1.698	0.0941049	0.758818	0.45059	-4.56018
Q5EBD0	Sec14l2	-0.133306	-0.290067	0.0234541	19.144	-1.69708	0.0942797	0.758818	0.45059	-4.56158
Q5GFD9	Impact	-0.344301	-0.750844	0.0622412	19.048	-1.69013	0.0956077	0.762909	0.451123	-4.57213
B0LT89	Stk24	0.427694	-0.0778094	0.933196	17.935	1.69148	0.0957962	0.762909	0.451123	-4.57098
A0A0G2JZX5		-0.19386	-0.422998	0.0352787	17.5854	-1.6884	0.0959393	0.762909	0.451123	-4.57474
D3ZE15	LOC100911483	0.263907	-0.0494416	0.577256	19.5356	1.68078	0.0974189	0.77029	0.454622	-4.58626
Q9Z2X5	Homer3	-0.295002	-0.645863	0.0558595	18.0798	-1.67794	0.0979744	0.77029	0.455621	-4.59054
F1LMA4	Adrbk1	0.140801	-0.0269103	0.308512	17.272	1.67544	0.0984643	0.77029	0.45687	-4.59429
P21575-5	Dnm1	-0.253746	-0.556361	0.0488704	19.5588	-1.67337	0.0988725	0.77029	0.457467	-4.59739
D3ZDC0	Nlgn3	-0.40834	-0.895781	0.0791018	17.5177	-1.67181	0.0991829	0.77029	0.457711	-4.59975
D4ACG7	Cpne6	-0.0841812	-0.184673	0.0163101	20.5022	-1.67176	0.0991923	0.77029	0.457711	-4.59982
P0DJJ3	Sgip1	-0.150922	-0.33162	0.0297749	18.5399	-1.66682	0.100174	0.772429	0.460455	-4.60722
B0BN46	Grhpr	-0.657031	-1.44465	0.130586	15.858	-1.66829	0.100415	0.772429	0.460849	-4.60598
Q64428	Hadha	-0.208966	-0.459503	0.0415708	18.3459	-1.66453	0.100633	0.772429	0.461033	-4.61065
P14604	Echs1	-0.119548	-0.263274	0.0241788	19.2927	-1.65993	0.101557	0.772454	0.462911	-4.6175
Q80Z30	Ppm1e	-0.172485	-0.380302	0.0353319	19.8369	-1.65637	0.102279	0.772454	0.464875	-4.62281
P62275	Rps29	0.487849	-0.100057	1.07576	19.6625	1.65693	0.102305	0.772454	0.464875	-4.62222
M0R776	Mrps36	-0.145501	-0.320859	0.0298571	19.8554	-1.65587	0.10238	0.772454	0.465014	-4.62355
Q63198	Cntn1	-0.135987	-0.30004	0.0280654	21.3781	-1.65425	0.10271	0.772454	0.46512	-4.62596
P21571	Atp5j	-0.262677	-0.580202	0.054849	21.1804	-1.65093	0.103388	0.772454	0.466244	-4.63088
P05197	Eef2	0.0989116	-0.0207596	0.218583	19.554	1.64947	0.103688	0.772454	0.466715	-4.63305
Q7TP14	Chid1	0.363677	-0.0770069	0.80436	17.1623	1.64693	0.104211	0.772454	0.467633	-4.63681
D3ZF26	Tnks1bp1	-0.219125	-0.48474	0.0464897	17.6971	-1.64637	0.104327	0.772454	0.46765	-4.63764
D4A831	Adgrb3	-0.561079	-1.24395	0.12179	21.0489	-1.64112	0.10563	0.772454	0.470658	-4.62844
A0A0A0MXW1	Bckdhb	-0.431041	-0.956121	0.0940387	17.2404	-1.6387	0.10599	0.772454	0.471158	-4.64908
B2RYQ2	Ppp2r4	0.263651	-0.0578589	0.585162	18.3464	1.63652	0.106375	0.772454	0.47134	-4.65217
Q4FZT9	Psmd2	-0.187697	-0.41669	0.0412965	18.7037	-1.63576	0.106534	0.772454	0.471693	-4.65328
Q7M0E3	Dstn	-0.336296	-0.747691	0.0750995	18.3555	-1.63136	0.107463	0.772454	0.473668	-4.65975
D3ZJ86	Slc9a6	-0.554784	-1.23456	0.124992	17.8984	-1.62916	0.107998	0.772454	0.4743	-4.64571
Q5XI64	Abhd6	-0.49219	-1.0955	0.111121	16.0839	-1.62853	0.10813	0.772454	0.474532	-4.664
Q5RJZ6	Scoc	-0.608032	-1.35434	0.13828	17.0983	-1.62878	0.10846	0.772454	0.474974	-4.64162
Q62717	Cadps	-0.145638	-0.324367	0.0330912	19.5973	-1.62617	0.108564	0.772454	0.475037	-4.66735
P36876	Ppp2r2a	0.143337	-0.0329453	0.319619	18.3255	1.62269	0.109307	0.772454	0.477238	-4.67243
Q5M9I5	Uqcrh	-0.297055	-0.663394	0.0692836	21.619	-1.61823	0.110267	0.772454	0.479417	-4.67893
G3V7T3	Pank4	-0.49473	-1.10622	0.116758	15.3996	-1.61972	0.110751	0.772454	0.480206	-4.6325
F1M0Z3	Cpne4	-0.144373	-0.32274	0.0339948	19.1802	-1.61531	0.110899	0.772454	0.480547	-4.68318
Q9ET64	Smpd2	0.394457	-0.093682	0.882595	16.0709	1.61501	0.111336	0.772454	0.480815	-4.68415
F1M0J7	Prickle2	-0.28523	-0.63891	0.0684511	17.3592	-1.60942	0.112182	0.772454	0.482112	-4.69173
M0R3V4	LOC501282	0.41765	-0.101001	0.936302	16.9501	1.60792	0.112652	0.772454	0.482412	-4.6941
D4A3V2	Ndufa6	-0.152222	-0.341493	0.0370486	18.8617	-1.60502	0.113148	0.772454	0.483219	-4.69809
G3V849	Dlgap1	-0.206661	-0.463698	0.0503757	17.581	-1.60454	0.113255	0.772454	0.483501	-4.69879
O08618	Prpsap2	-0.163018	-0.365935	0.039898	17.9896	-1.60327	0.113535	0.772454	0.484341	-4.70063
A0A0G2JU11	Rapgef2	-0.142064	-0.319008	0.0348794	18.8277	-1.60227	0.113755	0.772454	0.484598	-4.70206
G3V945	Aldh5a1	-0.134703	-0.302733	0.0333267	21.2089	-1.59985	0.114294	0.772454	0.485799	-4.70556
A0A096MIT7	Syn3	0.209506	-0.0518966	0.470908	17.8492	1.59946	0.114379	0.772454	0.485799	-4.70612
Q6P7Q2	Gpc1	0.236397	-0.0586935	0.531488	17.8053	1.59872	0.114543	0.772454	0.485799	-4.70718
Q63666-3	Vamp1	0.839007	-0.209101	1.88711	19.7477	1.59841	0.114755	0.772454	0.486088	-4.70782
Q5I0D5	Lhpp	-0.336743	-0.757678	0.0841922	17.1765	-1.5965	0.115038	0.772454	0.486229	-4.71037
B1H267	Snx5	0.203744	-0.0510465	0.458535	18.7539	1.59584	0.115187	0.772454	0.486229	-4.71133
G3V8K2	Gng3	-0.435201	-0.980292	0.109889	19.0532	-1.59377	0.115719	0.772454	0.486362	-4.71438
Q6AYN4	Phyhipl	-0.2165	-0.487677	0.0546766	17.3966	-1.59328	0.11576	0.772454	0.486362	-4.715
Q05140-2	Snap91	-0.17144	-0.386288	0.0434084	20.9125	-1.59245	0.115946	0.772454	0.48659	-4.71619
P25113	Pgam1	-0.165738	-0.373481	0.0420042	22.4355	-1.59215	0.116014	0.772454	0.48659	-4.71662
G3V741	Slc25a3	0.237934	-0.0609758	0.536845	21.3269	1.58856	0.116824	0.772454	0.487068	-4.72177
Q6AZ35	Dync1i2	-0.212267	-0.478934	0.0543996	18.5026	-1.58855	0.116826	0.772454	0.487068	-4.72178
F1LYS1	Rims1	-0.219833	-0.496104	0.0564384	17.25	-1.58797	0.116956	0.772454	0.487099	-4.72261
M0RCH6	Chmp4b	0.222237	-0.0583429	0.502816	18.5162	1.58069	0.118614	0.780177	0.490542	-4.73301
Q64620	Ppp6c	-0.226831	-0.513749	0.0600868	17.0269	-1.57773	0.119294	0.780177	0.490542	-4.73723
G3V7I0	Prdx3	0.23832	-0.0634043	0.540045	19.3863	1.57629	0.119624	0.780177	0.490542	-4.73926
A0A0G2K9Q6	Atp2b3	-0.0820734	-0.186107	0.0219602	19.4384	-1.5744	0.120061	0.780177	0.490693	-4.74195
Q9Z1E1	Flot1	-0.180299	-0.40888	0.0482811	18.3498	-1.57413	0.120123	0.780177	0.490693	-4.74233
P61227	Rap2b	0.187398	-0.0504154	0.425212	19.8922	1.57259	0.12048	0.780177	0.491311	-4.74452
P04905	Gstm1	-0.20421	-0.46379	0.0553713	20.6904	-1.56997	0.12109	0.781579	0.492955	-4.74824
A1L108	Arpc5l	0.22175	-0.0605084	0.504007	18.8493	1.56785	0.121584	0.782228	0.494283	-4.75124
P36860	Ralb	-0.150091	-0.341362	0.0411803	20.3757	-1.566	0.122016	0.782474	0.494955	-4.75385
Q3MIE9	Sms	-0.476362	-1.08437	0.131643	16.546	-1.56399	0.122555	0.783409	0.495707	-4.75664
P60203	Plp1	0.26251	-0.0738063	0.598826	24.0985	1.5577	0.123971	0.789915	0.49923	-4.76554
Q91ZN1	Coro1a	-0.0995405	-0.227399	0.0283183	20.3791	-1.55366	0.124932	0.7935	0.500905	-4.77121
G3V7S0	Folh1	-0.510295	-1.16802	0.147427	17.0985	-1.54834	0.126207	0.793623	0.502974	-4.77867
Q5HZE4	Mri1	-0.186941	-0.427971	0.0540892	17.8389	-1.54782	0.126333	0.793623	0.503233	-4.77939
A0A0G2JXY9	Epn2	0.142293	-0.0412035	0.32579	17.8114	1.54754	0.126399	0.793623	0.503233	-4.77978
Q02253	Aldh6a1	-0.13613	-0.31223	0.0399711	19.5426	-1.54269	0.127572	0.793623	0.50423	-4.78655
Q6URK4-2	Hnrnpa3	-0.290234	-0.665928	0.085461	20.8869	-1.5417	0.127812	0.793623	0.50423	-4.78793
P70566	Tmod2	-0.229289	-0.526131	0.0675536	19.0191	-1.5415	0.127861	0.793623	0.50423	-4.7882
D4ADD8	Dctn6	0.470498	-0.138852	1.07985	17.4534	1.54133	0.127971	0.793623	0.50423	-4.78058
A0A0H2UHM5	Pdia3	0.141536	-0.0420083	0.32508	20.1923	1.53891	0.128492	0.793623	0.504827	-4.79181
F1LY19	Upf1	0.174581	-0.0520576	0.401219	17.232	1.53727	0.128893	0.793623	0.505568	-4.79409
D3ZY47	RGD1559896	-0.190103	-0.437202	0.0569951	17.7424	-1.53535	0.129363	0.793623	0.506747	-4.79675
D3ZPR0	Cse1l	-0.174947	-0.402514	0.0526201	18.1124	-1.53421	0.129643	0.793623	0.507428	-4.79833
P17078	Rpl35	0.234538	-0.0709363	0.540011	18.1544	1.53223	0.130129	0.793623	0.508016	-4.80107
B0BN85	Sugt1	-0.344372	-0.793289	0.104545	17.3983	-1.53091	0.130456	0.793623	0.508016	-4.8029
G3V936	Cs	-0.137862	-0.317914	0.0421901	21.2208	-1.52803	0.131167	0.793623	0.509106	-4.80687
D4A1Q2	Mapt	-0.119989	-0.276942	0.0369645	21.2955	-1.52566	0.131758	0.793623	0.509106	-4.81015
B0BNL2	LOC364561	-0.147111	-0.339607	0.045385	20.0229	-1.52514	0.131886	0.793623	0.509106	-4.81086
M0R5T4	Rac3	-0.185344	-0.428238	0.0575497	17.9359	-1.52504	0.132283	0.793623	0.509484	-4.79299
A0A0G2K8W9	Sptbn1	-0.137495	-0.317855	0.0428647	20.9754	-1.52137	0.132829	0.793623	0.50974	-4.81606
P27139	Ca2	-0.346812	-0.801886	0.108262	20.2252	-1.52089	0.132948	0.793623	0.50974	-4.81671
P61150-2	Fgf12	0.507299	-0.15897	1.17357	16.5487	1.5222	0.133073	0.793623	0.510056	-4.81521
Q5PQN0	Ncald	-0.42489	-0.982981	0.133201	17.6772	-1.51935	0.133335	0.793623	0.510198	-4.81883
G3V7U4	Lmnb1	-0.181518	-0.421864	0.0588279	17.5864	-1.5072	0.136417	0.798632	0.51655	-4.83546
Q62658	Fkbp1a	-0.311974	-0.725081	0.101133	20.6746	-1.5071	0.136441	0.798632	0.51655	-4.83559
D3ZZZ9	Ctnnd1	0.360732	-0.11772	0.839185	16.3499	1.50548	0.136999	0.798632	0.516964	-4.8379
G3V7V3	Slc27a4	0.246941	-0.0812301	0.575113	16.6552	1.50169	0.137832	0.798632	0.518467	-4.84296
M0R5H1	Etl4	0.159664	-0.0530836	0.372412	17.186	1.49771	0.13886	0.798632	0.520033	-4.84835
F1LML7	Hip1r	0.269277	-0.0900684	0.628622	17.8251	1.49546	0.139447	0.798632	0.521253	-4.85141
Q5XI34	Ppp2r1a	-0.106108	-0.24792	0.0357047	20.7458	-1.4932	0.140034	0.798632	0.522159	-4.85445
A0A0G2K5V4		0.503808	-0.17138	1.179	17.1755	1.48994	0.14103	0.798632	0.522358	-4.85091
B2GUZ3	Mthfd1l	-0.256843	-0.601145	0.0874595	17.0608	-1.48872	0.141208	0.798632	0.522404	-4.8605
B5DFG5	Sept6	-0.141659	-0.331597	0.048279	19.0571	-1.4884	0.141294	0.798632	0.522404	-4.86094
P11980	Pkm	-0.0909644	-0.212971	0.0310424	22.785	-1.4879	0.141424	0.798632	0.522404	-4.86161
P61765	Stxbp1	-0.0858664	-0.201096	0.0293636	22.154	-1.48711	0.141631	0.798632	0.522404	-4.86267
B5DFN4	Pfdn5	0.286819	-0.0985819	0.67222	17.6872	1.48519	0.142139	0.798632	0.523069	-4.86526
P10687	Plcb1	-0.142252	-0.333786	0.0492812	19.2515	-1.48218	0.142936	0.798632	0.524335	-4.8693
D4A6H8	Ctnna2	0.163266	-0.0567291	0.383262	17.7666	1.48105	0.143237	0.798632	0.524732	-4.87082
P62268	Rps23	0.445636	-0.155839	1.04711	17.7053	1.47859	0.143891	0.798632	0.525353	-4.87411
F7EPH4	Ppa1	-0.159686	-0.375392	0.0560204	18.7149	-1.47737	0.144217	0.798632	0.52606	-4.87574
M0RC65	Cfl2	-0.205388	-0.483404	0.072628	19.4091	-1.47432	0.145035	0.798632	0.527131	-4.87983
P25093	Fah	-0.151843	-0.358023	0.0543366	17.5858	-1.46972	0.146272	0.798632	0.529029	-4.88596
Q6J4I0	Ppp1r1b	-0.174886	-0.41305	0.0632775	18.0018	-1.46544	0.147435	0.798632	0.531945	-4.89166
D4A4T0	Stub1	-0.238458	-0.563819	0.086903	17.47	-1.46263	0.148201	0.798632	0.532583	-4.89539
Q9Z2I7	Svop	0.255969	-0.0935828	0.605521	16.462	1.46178	0.148502	0.798632	0.532583	-4.8723
Q5XI72	Eif4h	0.274436	-0.101369	0.650241	18.5464	1.45736	0.149645	0.798632	0.534101	-4.90236
G3V881	Lingo1	0.58567	-0.217635	1.38897	16.5464	1.45805	0.149986	0.798632	0.534679	-4.82848
O08836	Igbp1	-0.358441	-0.850195	0.133313	16.1273	-1.45587	0.150267	0.798632	0.535361	-4.9044
F7F1Y3	Vps4a	0.223532	-0.083187	0.530251	17.295	1.45441	0.150459	0.798632	0.535562	-4.90626
D4A1S6	Ppp1r12a	-0.310042	-0.736374	0.11629	16.2917	-1.45297	0.151145	0.798632	0.536069	-4.90825
Q924S1	Agpat4	0.347224	-0.130229	0.824678	16.7352	1.45213	0.151228	0.798632	0.536069	-4.9093
Q5FVI6	Atp6v1c1	-0.141696	-0.336685	0.053293	20.0057	-1.45022	0.151618	0.798632	0.53617	-4.91177
D3ZZP2	Rab39a	0.679752	-0.258634	1.61814	18.9058	1.44968	0.152476	0.798632	0.53728	-4.89148
G3V774	Fbxo2	-0.154765	-0.36853	0.0590004	19.6166	-1.44485	0.153118	0.798632	0.538084	-4.91882
A0A140TAB3	Klc1	-0.3708	-0.883631	0.142032	18.8372	-1.44295	0.15365	0.798632	0.538599	-4.92131
A0A0G2JWM2	Sirt2	-0.225278	-0.536854	0.0862986	19.0547	-1.44291	0.15366	0.798632	0.538599	-4.92135
P19103	Ppp1r1a	0.397084	-0.152629	0.946796	18.4012	1.44156	0.15404	0.798632	0.539148	-4.92312
Q63259	Ptprn	0.350721	-0.135276	0.836718	15.9638	1.44182	0.154256	0.798632	0.53942	-4.92284
D3ZQL7	Tppp	-0.17079	-0.407544	0.0659636	21.3071	-1.43964	0.154583	0.798632	0.539773	-4.92564
Q9JMJ4	Prpf19	-0.20012	-0.477903	0.0776631	17.5917	-1.43771	0.155127	0.798632	0.540565	-4.92816
P63245	Gnb2l1	0.331048	-0.128704	0.790801	18.2297	1.43779	0.155244	0.798632	0.540658	-4.92809
D4A9D6	Dhx9	-0.134732	-0.322132	0.0526672	17.7301	-1.4348	0.155953	0.798632	0.540691	-4.93195
Q32KK2	Arsa	-0.439894	-1.05249	0.172698	16.3682	-1.43607	0.15612	0.798632	0.540691	-4.86093
Q6AXT5	Rab21	-0.221756	-0.530491	0.0869789	17.8761	-1.43343	0.156342	0.798632	0.540691	-4.93373
O35889	Mllt4	-0.189867	-0.455365	0.0756306	17.5317	-1.42717	0.158131	0.798632	0.543809	-4.94186
A0A0G2KAM4		0.24366	-0.0971446	0.584465	19.1572	1.42681	0.158235	0.798632	0.543826	-4.94233
B0BNM1	Apoa1bp	0.179258	-0.071643	0.430158	18.3785	1.42581	0.158521	0.798632	0.543826	-4.94361
Q5HZV9	Ppp1r7	-0.106126	-0.254922	0.0426694	18.7364	-1.42338	0.159224	0.798632	0.54497	-4.94677
Q9JKS6-2	Pclo	-0.094071	-0.226011	0.0378691	20.4319	-1.42287	0.159369	0.798632	0.545155	-4.94742
Q68FZ8	Pccb	-0.400193	-0.962216	0.161829	16.7648	-1.42142	0.159859	0.798632	0.546359	-4.93084
A0A1W2Q6Q2	Dclk1	-0.120452	-0.289652	0.048749	19.0749	-1.42068	0.160002	0.798632	0.546694	-4.95024
F1M7V6	Cadm4	-0.227931	-0.548186	0.0923241	17.2862	-1.42035	0.1601	0.798632	0.546706	-4.95068
F1M775	Diaph1	-0.431722	-1.03853	0.175083	15.936	-1.42023	0.160201	0.798632	0.546706	-4.95084
P50399	Gdi2	0.104902	-0.0428	0.252603	20.4959	1.41737	0.160964	0.798632	0.546724	-4.95451
D3ZJ01	RGD1307235	-0.151049	-0.363805	0.0617072	18.1092	-1.41685	0.161118	0.798632	0.546919	-4.95519
D3ZBM3	Fech	0.184591	-0.0755308	0.444713	17.7081	1.41619	0.16131	0.798632	0.546919	-4.95604
P15791-2	Camk2d	-0.180932	-0.436068	0.0742049	17.7915	-1.41523	0.161587	0.798632	0.547142	-4.95726
A0A0G2K2L8	Cask	-0.248063	-0.598225	0.1021	17.3042	-1.41377	0.162016	0.798632	0.547312	-4.95915
D4A9D8	Osbp	-0.392504	-0.946646	0.161639	16.9966	-1.41354	0.162082	0.798632	0.547312	-4.95944
A0A0G2JTL5	Pc	-0.109651	-0.264463	0.0451622	19.0322	-1.41348	0.162099	0.798632	0.547312	-4.95951
D4AC36	Eif3f	0.391966	-0.162782	0.946713	16.522	1.41402	0.162644	0.798632	0.547964	-4.94024
P11530	Dmd	-0.201943	-0.48799	0.084103	17.8625	-1.4089	0.163446	0.798632	0.54814	-4.96539
Q5BJN7	LOC100360647	0.662337	-0.277518	1.60219	16.8594	1.40935	0.16384	0.798632	0.548271	-4.93146
A0A140TAI3	Hnrnpc	0.127031	-0.0530996	0.307161	20.2611	1.40737	0.163896	0.798632	0.548271	-4.96734
F1LMW7	Marcks	-0.495382	-1.1985	0.207733	18.5343	-1.40605	0.164287	0.798632	0.548757	-4.96903
Q8VI04	Asrgl1	-0.143754	-0.348058	0.0605513	19.3353	-1.40419	0.164837	0.798632	0.549165	-4.9714
O70196	Prep	-0.291976	-0.707893	0.123942	17.6808	-1.40096	0.165797	0.798632	0.550292	-4.97552
Q62888-2	Nlgn2	-0.371398	-0.90127	0.158474	16.9134	-1.39957	0.166349	0.798632	0.550713	-4.97726
D4A6G6	LOC100362339	0.295129	-0.126734	0.716992	19.138	1.39613	0.16724	0.798632	0.552586	-4.98166
Q68FW9	Cops3	-0.197255	-0.47957	0.0850598	18.1775	-1.39438	0.167766	0.798632	0.553004	-4.98388
Q5XI78	Ogdh	-0.0840783	-0.204511	0.0363542	20.2648	-1.39324	0.168108	0.798632	0.553513	-4.98532
P85108	Tubb2a	0.242533	-0.105225	0.590291	24.1035	1.39181	0.168539	0.798632	0.553984	-4.98713
Q9Z269	Vapb	-0.341677	-0.832252	0.148897	18.8062	-1.38995	0.169103	0.798632	0.554084	-4.98949
Q6AYD3	Pa2g4	0.190463	-0.0830083	0.463934	17.4709	1.38991	0.169115	0.798632	0.554084	-4.98954
D3ZW15	Sec24b	-0.463182	-1.12878	0.202417	17.3561	-1.38993	0.169319	0.798632	0.554084	-4.98949
A0A0A0MY31	Itpr1	-0.492466	-1.19996	0.215025	17.7721	-1.38913	0.169351	0.798632	0.554084	-4.99053
Q6P136	Hyou1	0.153285	-0.0673203	0.37389	18.9761	1.38666	0.170098	0.798632	0.555358	-4.99364
G3V927	Dlgap4	0.319567	-0.14038	0.779515	16.9824	1.38657	0.170127	0.798632	0.555358	-4.99376
B2RYN1	Fn3krp	-0.157831	-0.385024	0.0693622	18.6251	-1.38638	0.170183	0.798632	0.555386	-4.99399
P18420	Psma1	-0.112716	-0.275199	0.0497674	19.3228	-1.3844	0.170785	0.798632	0.555907	-4.99648
A0A0G2K931	Psat1	-0.118052	-0.28835	0.0522462	18.9061	-1.38341	0.171089	0.798632	0.556366	-4.99774
P15087	Cpe	-0.146417	-0.357974	0.0651399	18.7909	-1.38118	0.171769	0.798632	0.557395	-5.00054
P14270-1	Pde4d	-0.556245	-1.36038	0.247894	21.1033	-1.38045	0.171992	0.798632	0.557934	-5.00145
G3V9L3	Dusp3	-0.647394	-1.58373	0.288946	17.9001	-1.38098	0.17204	0.798632	0.557936	-4.97317
Q5U1Z9	Mtx2	-0.209245	-0.512077	0.0935856	18.2459	-1.37893	0.172459	0.798632	0.558551	-5.00336
Q5RJR2	Twf1	-0.346527	-0.848107	0.155053	17.91	-1.37875	0.172516	0.798632	0.558551	-5.0036
Q63768	Crk	0.42371	-0.190215	1.03763	17.1444	1.37978	0.172639	0.798632	0.558551	-4.97951
Q4FZT2	Ppme1	0.224218	-0.100534	0.54897	17.9215	1.37786	0.172787	0.798632	0.558575	-5.0047
P04764	Eno1	-0.10638	-0.260688	0.0479285	22.7464	-1.3758	0.173421	0.798632	0.559352	-5.00728
F1LYI5	RGD1564138	0.380339	-0.171674	0.932352	18.4869	1.37502	0.173664	0.798632	0.559502	-5.00827
P60522	Gabarapl2	-0.502886	-1.23363	0.227853	16.2464	-1.37628	0.173796	0.798632	0.559502	-4.95888
Q9QX69	Lancl1	-0.358053	-0.878172	0.162065	18.3292	-1.37383	0.174031	0.798632	0.559979	-5.00975
Q68FY0	Uqcrc1	-0.121132	-0.297411	0.0551474	21.2466	-1.37134	0.174803	0.798632	0.56125	-5.01287
A0A0G2JTR4		0.119485	-0.0547524	0.293723	18.6367	1.36854	0.17567	0.798632	0.562262	-5.01635
P13084	Npm1	-0.170287	-0.418713	0.0781391	20.0501	-1.36795	0.175855	0.798632	0.562262	-5.01708
D4AE02	Fam98b	-0.425497	-1.04705	0.196053	16.9254	-1.37001	0.175908	0.798632	0.562262	-4.99146
F1LRI5	Gcn1l1	-0.341324	-0.839506	0.156858	16.3215	-1.36768	0.176008	0.798632	0.562262	-4.99178
P09895	Rpl5	0.106342	-0.0489251	0.261609	18.97	1.36682	0.176207	0.798632	0.562262	-5.01849
Q5FVH2	Pld3	0.254429	-0.117214	0.626071	18.2568	1.3674	0.176237	0.798632	0.562262	-4.97218
E9PU01	Chd4	0.339494	-0.156499	0.835487	16.4114	1.36713	0.176319	0.798632	0.562262	-4.99666
Q5PPH0	Enoph1	-0.301385	-0.741645	0.138874	18.1121	-1.36616	0.176415	0.798632	0.562262	-5.01932
B1H2A6	Fxr2	0.334931	-0.155058	0.82492	16.1667	1.36845	0.176481	0.798632	0.562262	-4.96945
F1MAA7	Lamc1	-0.503515	-1.23991	0.232878	16.5543	-1.36531	0.176817	0.798632	0.562571	-5.02037
P00173-2	Cyb5a	-0.319543	-0.787211	0.148126	18.0321	-1.36433	0.177124	0.798632	0.562632	-5.02159
Q63327-2	Mobp	-0.529726	-1.30545	0.245998	17.1341	-1.36355	0.177367	0.798632	0.562669	-4.99943
P85845	Fscn1	0.10648	-0.0494833	0.262443	19.8204	1.36249	0.177564	0.798632	0.563143	-5.02388
A0A096MJE6	Tnr	-0.145253	-0.35813	0.0676245	20.2933	-1.3617	0.177811	0.798632	0.563266	-5.02485
D4ADF5	Pdcd5	-0.375475	-0.925983	0.175033	18.1635	-1.3619	0.177886	0.798632	0.563266	-5.0246
P62959	Hint1	-0.234939	-0.579545	0.109668	21.0669	-1.36056	0.178169	0.798632	0.563714	-5.02626
A0A0G2JZ69	Sptan1	-0.222844	-0.54983	0.104141	21.2845	-1.36006	0.178325	0.798632	0.563944	-5.02688
P62907	Rpl10a	0.122997	-0.0575136	0.303507	19.1908	1.35981	0.178406	0.798632	0.563944	-5.02719
F1LYZ8	Ppp1r21	-0.367337	-0.906897	0.172223	17.9183	-1.35866	0.178767	0.798632	0.56426	-5.02861
O55166	Vps52	0.25777	-0.121119	0.636659	17.0549	1.35771	0.179068	0.798632	0.564344	-5.02979
Q9Z327-3	Synpo	-0.163167	-0.403273	0.0769383	18.9701	-1.35618	0.179552	0.798632	0.564483	-5.03168
D3ZFB6	Prrt2	-0.151714	-0.375097	0.0716683	20.2948	-1.35539	0.179802	0.798632	0.564483	-5.03266
A0A0G2K079	Bcas1	-0.296281	-0.733229	0.140667	18.0671	-1.35357	0.180448	0.798632	0.564757	-5.0349
P47860	Pfkp	0.0726074	-0.0344615	0.179676	20.8719	1.35333	0.180455	0.798632	0.564757	-5.0352
M0R735	Syncrip	0.182837	-0.0868552	0.452528	18.0575	1.35295	0.180576	0.798632	0.564757	-5.03566
P01946	Hba1	-0.219617	-0.54403	0.104795	23.5477	-1.351	0.181197	0.798632	0.565128	-5.03807
P41499-1	Ptpn11	-0.0934123	-0.231518	0.044693	20.1503	-1.34983	0.181569	0.798632	0.565128	-5.0395
P29418	Atp5e	0.328684	-0.157822	0.815189	19.524	1.34864	0.182018	0.798632	0.565689	-5.04093
Q5M7U6	Actr2	-0.147398	-0.365779	0.0709824	19.7323	-1.34699	0.182479	0.798632	0.56609	-5.04299
G3V8A5	Vps35	-0.196381	-0.487458	0.0946961	19.5031	-1.34641	0.182664	0.798632	0.566368	-5.0437
A0A140TAI6	LOC100361060	0.282285	-0.136431	0.701	18.0155	1.34541	0.182985	0.798632	0.567001	-5.04493
A0A0G2JZI2	Eprs	0.121062	-0.0588702	0.300994	18.3404	1.34272	0.183851	0.798632	0.567687	-5.04822
Q4QRB4	Tubb3	-0.0930476	-0.231425	0.0453295	22.9225	-1.34192	0.184108	0.798632	0.56804	-5.0492
Q6P747	Hp1bp3	-0.170747	-0.424891	0.0833963	18.6063	-1.34079	0.184474	0.798632	0.568432	-5.05058
F1LQD2	Camkk1	-0.178312	-0.444024	0.0874008	18.2088	-1.33923	0.184979	0.798632	0.569402	-5.05249
D4A6U1	Adam11	-0.147478	-0.367602	0.0726472	18.1201	-1.33704	0.18569	0.798632	0.570705	-5.05516
A0A0H2UHL9	Dbn1	-0.0872028	-0.217463	0.0430575	20.5325	-1.336	0.186028	0.798632	0.570842	-5.05643
Q63560	Map6	-0.111161	-0.277639	0.0553178	21.4281	-1.33254	0.187155	0.798632	0.572014	-5.06064
G3V8V1	Grn	0.238479	-0.118728	0.595687	19.6213	1.33234	0.187218	0.798632	0.572014	-5.06087
Q01728-2	Slc8a1	-0.145622	-0.363811	0.0725678	18.0955	-1.33192	0.187357	0.798632	0.572143	-5.06139
D3ZNQ6	Ube2m	0.177973	-0.0890989	0.445045	18.3318	1.32988	0.188025	0.798632	0.572291	-5.06386
P04775	Scn2a	-0.186871	-0.467434	0.0936911	17.4311	-1.32923	0.188238	0.798632	0.57249	-5.06465
P30349	Lta4h	-0.0959797	-0.240194	0.0482348	18.5923	-1.32818	0.188583	0.798632	0.572614	-5.06592
D4AEP0	Adss	-0.230421	-0.576802	0.115959	17.938	-1.32757	0.188784	0.798632	0.572614	-5.06666
P10362	Scg2	0.242335	-0.1221	0.60677	19.7861	1.32703	0.18896	0.798632	0.572683	-5.06731
P13852	Prnp	-0.371553	-0.9311	0.187995	20.5334	-1.32517	0.189575	0.798632	0.573631	-5.06957
O08838	Amph	-0.09075	-0.227606	0.0461064	19.9186	-1.32333	0.190181	0.798632	0.574624	-5.07178
A0A0G2KA27	Madd	0.10297	-0.0523785	0.258318	17.6797	1.32279	0.190361	0.798632	0.574755	-5.07244
Q5RKH2	Galk1	-0.273054	-0.685805	0.139697	16.1158	-1.32214	0.190928	0.798632	0.575766	-5.05154
P31647	Slc6a11	-0.194841	-0.489765	0.100083	18.8304	-1.31843	0.191807	0.798632	0.577162	-5.07769
A1L1M0	Prkaca	-0.229512	-0.577168	0.118144	19.2335	-1.31748	0.192125	0.798632	0.577437	-5.07883
A0A0G2JVM0	Aldh4a1	0.336282	-0.173547	0.84611	16.6234	1.31669	0.192452	0.798632	0.577937	-5.07976
Q1M168	Atcay	0.154386	-0.0798852	0.388656	18.6197	1.31515	0.192901	0.798632	0.578432	-5.08163
Q5M7A7	Cnrip1	-0.0864514	-0.217666	0.0447635	19.9162	-1.31485	0.193002	0.798632	0.578432	-5.08199
F1M5M9	Srgap3	-0.136431	-0.343613	0.0707497	17.8658	-1.31417	0.193229	0.798632	0.578643	-5.0828
B5DFD8	Sh3bgrl	-0.74832	-1.88654	0.3899	16.285	-1.31277	0.193832	0.798632	0.578705	-5.0572
D3ZWA8	Appl1	-0.156978	-0.395941	0.0819845	17.6082	-1.31098	0.194298	0.798632	0.578705	-5.08662
Q62639	Rheb	0.192054	-0.100377	0.484485	17.9339	1.31065	0.19441	0.798632	0.578714	-5.08702
A0A0G2JWK6		-0.210201	-0.530635	0.110233	18.1781	-1.31063	0.194694	0.798632	0.578714	-5.08671
G3V8G5	Glg1	0.174528	-0.091896	0.440952	17.3866	1.30731	0.195534	0.798632	0.579603	-5.09101
P63086	Mapk1	-0.137784	-0.348315	0.0727464	20.2981	-1.30608	0.195949	0.798632	0.579689	-5.09247
P69682	Necap1	-0.289209	-0.731149	0.152731	18.674	-1.30597	0.195985	0.798632	0.579689	-5.0926
F1LN59	Eif4g2	0.436528	-0.231449	1.10451	19.6538	1.30528	0.196424	0.798632	0.580292	-5.09337
F1M6A8	Akt3	-0.149776	-0.378965	0.0794139	17.3004	-1.30417	0.196597	0.798632	0.580292	-5.09475
P37397	Cnn3	-0.255273	-0.646461	0.135916	17.6326	-1.30502	0.196815	0.798632	0.580292	-5.09329
Q99NA5	Idh3a	-0.14535	-0.367892	0.0771924	21.0632	-1.30343	0.196846	0.798632	0.580292	-5.09562
Q4G017	Nisch	-0.163663	-0.414873	0.0875465	17.2963	-1.30017	0.197954	0.799472	0.580533	-5.09949
B2RYX0	Naca	0.571782	-0.307512	1.45108	20.262	1.30003	0.198431	0.799472	0.580711	-5.09937
P62747	Rhob	-0.157473	-0.399541	0.0845955	19.9145	-1.29824	0.198615	0.799472	0.580902	-5.10179
Q5BJT9	Ckmt1b	-0.102598	-0.260577	0.0553812	22.1323	-1.29606	0.199359	0.799472	0.581712	-5.10437
A0A0G2K8H0	Caprin1	-0.353379	-0.897653	0.190896	17.5657	-1.29643	0.199366	0.799472	0.581712	-5.10389
A0A0H2UHZ1	Aqp4	-0.433276	-1.10085	0.234296	17.69	-1.29634	0.199466	0.799472	0.581861	-5.10398
B5DFC8	Eif3c	0.175373	-0.0956985	0.446444	16.2335	1.29112	0.201058	0.801537	0.584213	-5.11021
Q5U211	Snx3	-0.157193	-0.400176	0.08579	18.4923	-1.29105	0.20108	0.801537	0.584213	-5.11028
Q6IRJ7	Anxa7	-0.189207	-0.481748	0.103334	17.9078	-1.29073	0.201191	0.801537	0.584213	-5.11066
Q9Z0W5	Pacsin1	-0.154346	-0.393627	0.0849356	21.8992	-1.28728	0.202385	0.802235	0.585933	-5.11473
D4A9A3	Cenpv	-0.377764	-0.963655	0.208127	16.9962	-1.28709	0.202515	0.802235	0.586027	-5.11493
P04182	Oat	-0.153859	-0.392488	0.0847703	18.7408	-1.28673	0.202576	0.802235	0.586061	-5.11538
Q9JHU0	Dpysl5	-0.14722	-0.37608	0.08164	18.989	-1.28376	0.203607	0.804712	0.587049	-5.11886
Q6P3V9	Rpl4	0.081293	-0.0452394	0.207825	19.9904	1.28215	0.204168	0.805205	0.587779	-5.12075
F1LYG2	Sipa1l3	-0.280254	-0.717317	0.156809	15.892	-1.28001	0.204979	0.805205	0.589013	-5.12323
Q5XHX3	Enah	-0.272353	-0.697391	0.152685	17.912	-1.27876	0.20535	0.805205	0.58951	-5.1247
G3V644	Ndufv3	-0.137558	-0.352387	0.0772708	19.1217	-1.27785	0.20567	0.805205	0.58984	-5.12577
G3V9B3	Mag	-0.267997	-0.686882	0.150888	18.2159	-1.2768	0.20604	0.805205	0.59003	-5.127
Q4KM65	Nudt21	-0.414118	-1.0627	0.234466	16.1722	-1.27826	0.206283	0.805205	0.590482	-5.10184
Q62768	Unc13a	-0.190572	-0.489281	0.108137	16.7734	-1.2732	0.207304	0.805205	0.591845	-5.13119
Q03114	Cdk5	-0.143103	-0.367437	0.0812305	18.6642	-1.27304	0.207362	0.805205	0.591868	-5.13138
Q63564	Sv2b	-0.167462	-0.430283	0.0953585	19.231	-1.27158	0.207877	0.805205	0.592487	-5.13307
Q3S4A5	Arfgap1	0.141532	-0.0807102	0.363774	17.7034	1.27091	0.208114	0.805205	0.592738	-5.13385
A0A0G2K1G8		0.185826	-0.106224	0.477876	17.4672	1.2698	0.208506	0.805205	0.592946	-5.13514
D4A6P1	Sez6l2	0.230861	-0.132036	0.593758	17.0662	1.26956	0.208592	0.805205	0.592946	-5.13542
D4A435	Icam5	-0.163034	-0.420078	0.0940087	20.3944	-1.26579	0.209933	0.80588	0.59467	-5.13979
D3ZAF6	Atp5j2	0.296753	-0.171325	0.764832	19.6183	1.26521	0.210136	0.80588	0.59467	-5.14045
A0A0G2QC41	Hdac6	-0.167974	-0.433052	0.097103	16.9626	-1.26461	0.210351	0.80588	0.59467	-5.14115
D4ADE5	Setd7	0.32625	-0.188642	0.841142	17.7824	1.26451	0.210388	0.80588	0.59467	-5.14127
Q05175	Basp1	-0.353541	-0.912102	0.205021	22.3928	-1.26315	0.210872	0.806181	0.595461	-5.14284
A0A0G2K0W9	Psma7	-0.0917048	-0.236869	0.053459	18.4058	-1.26073	0.211739	0.806889	0.597134	-5.14563
Q4AE70-3	Carm1	0.422805	-0.247231	1.09284	16.3321	1.26153	0.211869	0.806889	0.597134	-5.13481
B2RYS2	LOC685596	-0.136855	-0.353923	0.0802129	20.6437	-1.25821	0.212643	0.808049	0.598037	-5.14853
Q9QUL6	Nsf	-0.0813282	-0.21053	0.0478731	22.193	-1.25621	0.213363	0.808049	0.598211	-5.15083
F7EYB9	Omg	-0.164748	-0.42649	0.0969949	18.6967	-1.25612	0.213393	0.808049	0.598211	-5.15093
A0A0G2JYT1	Erc1	0.186496	-0.110602	0.483595	17.263	1.25273	0.214618	0.810587	0.599323	-5.15482
P70600	Ptk2b	-0.105003	-0.272374	0.0623683	18.9483	-1.25201	0.214879	0.810587	0.599323	-5.15565
G3V6L8	Strn	-0.15156	-0.393441	0.0903215	18.2499	-1.25046	0.215441	0.811169	0.600137	-5.15742
G3V6L4	Kif5c	-0.110478	-0.287212	0.0662566	18.1616	-1.2475	0.216516	0.812427	0.601525	-5.1608
D3ZGE6	Cttn	-0.145341	-0.377887	0.0872044	18.91	-1.24729	0.216593	0.812427	0.601525	-5.16104
Q62991	Scfd1	0.248779	-0.150239	0.647798	16.4444	1.24606	0.217382	0.813852	0.602591	-5.16209
G3V733	Syn2	-0.0775997	-0.202362	0.0471623	23.0323	-1.24126	0.218796	0.817605	0.604679	-5.1679
P62755	Rps6	0.15996	-0.0978455	0.417766	18.4582	1.23824	0.219906	0.820211	0.605599	-5.17132
P12007	Ivd	-0.145033	-0.379194	0.0891271	18.0871	-1.23606	0.22071	0.820631	0.606997	-5.17379
P35565	Canx	0.318661	-0.196568	0.833889	19.7132	1.23429	0.221368	0.820631	0.607364	-5.1758
P08644-2	Kras	-0.177838	-0.465469	0.109793	18.2525	-1.23389	0.221514	0.820631	0.607547	-5.17625
P49088	Asns	-0.261424	-0.684443	0.161596	17.1202	-1.23364	0.221669	0.820631	0.607554	-5.1765
D3Z955	Pgm2l1	0.391031	-0.244927	1.02699	18.4488	1.22707	0.22405	0.827901	0.611808	-5.18393
Q6AZ50	Atg3	-0.286548	-0.754399	0.181304	16.544	-1.22263	0.225777	0.832734	0.614203	-5.18888
F1M949	Ckap5	-0.146838	-0.387035	0.0933585	17.5763	-1.22	0.226702	0.833268	0.615689	-5.19185
D3ZLK9	Carkd	-0.328386	-0.865624	0.208852	16.9011	-1.21985	0.22676	0.833268	0.615704	-5.19202
A0A0G2JSQ1	Sncb	-0.172739	-0.45608	0.110602	21.5324	-1.21666	0.227964	0.836147	0.616867	-5.19558
Q62747-2	Syt7	-0.464056	-1.22725	0.299139	17.2848	-1.21522	0.228844	0.836173	0.617569	-5.19696
P24473	Gstk1	0.366554	-0.236557	0.969665	17.4298	1.21358	0.229257	0.836173	0.618249	-5.19893
P20059	Hpx	-0.321903	-0.851867	0.20806	17.1033	-1.21251	0.229599	0.836173	0.618493	-5.20016
D4A9L2	Srsf1	0.165857	-0.107196	0.438911	18.448	1.2122	0.229653	0.836173	0.618493	-5.20053
P21531	Rpl3	0.12526	-0.0815893	0.332109	19.1795	1.2085	0.231065	0.839065	0.619696	-5.20464
P97846	Cntnap1	-0.148038	-0.392624	0.0965466	19.1538	-1.2079	0.231292	0.839065	0.620105	-5.2053
F1LPT4	Camkk2	-0.172966	-0.459258	0.113327	16.9236	-1.20569	0.232138	0.839924	0.620833	-5.20774
Q62688	Plcl1	0.299994	-0.197886	0.797875	16.9551	1.2028	0.23331	0.839924	0.621657	-5.2109
Q7TQ16	Uqcrq	-0.130942	-0.348646	0.0867615	19.8642	-1.20033	0.234198	0.839924	0.622053	-5.21365
D3ZEI4	Hepacam	-0.0945154	-0.251929	0.0628981	19.5538	-1.19825	0.235001	0.839924	0.622357	-5.21593
P30835	Pfkl	-0.124077	-0.33101	0.0828556	20.0347	-1.1966	0.23564	0.839924	0.623175	-5.21774
Q6PDV6	Rps14	0.245917	-0.164429	0.656263	17.5679	1.19631	0.235815	0.839924	0.623175	-5.21803
A0A5H1ZRV8	Camsap2	-0.20794	-0.555028	0.139148	16.6237	-1.1956	0.236029	0.839924	0.623175	-5.21884
G3V6V1	Rnpep	-0.0970658	-0.259102	0.0649705	18.8595	-1.19548	0.236076	0.839924	0.623175	-5.21898
P19492-2	Gria3	0.20688	-0.138508	0.552269	17.4136	1.19536	0.236121	0.839924	0.623175	-5.2191
P62243	Rps8	0.234624	-0.157425	0.626674	19.1191	1.19431	0.236526	0.839924	0.623902	-5.22025
B1WBW4	Armc10	0.15406	-0.103436	0.411557	17.5775	1.19401	0.236646	0.839924	0.624079	-5.22059
Q497B0	Nit2	0.290798	-0.196425	0.778021	17.3989	1.19247	0.237504	0.839924	0.62428	-5.22209
P60892	Prps1	-0.127825	-0.341919	0.0862698	18.6768	-1.1915	0.23762	0.839924	0.62428	-5.22332
P85834	Tufm	-0.108297	-0.289763	0.0731692	19.33	-1.19099	0.237821	0.839924	0.62428	-5.22389
Q6PDV7	Rpl10	0.143168	-0.0967523	0.383088	18.5241	1.19087	0.237866	0.839924	0.62428	-5.22401
Q9WVE9	Itsn1	-0.110085	-0.295046	0.0748756	17.2514	-1.18778	0.239074	0.841311	0.624774	-5.22738
B0K017	Adprhl2	-0.215164	-0.576855	0.146526	18.5871	-1.18819	0.239105	0.841311	0.624774	-5.22683
P62718	Rpl18a	0.227784	-0.155408	0.610975	17.9336	1.1863	0.239655	0.841756	0.625652	-5.22899
Q9QX74-2	Shank2	-0.194576	-0.523175	0.134022	17.4854	-1.18171	0.241459	0.841818	0.628435	-5.23397
G3V9W5	Pip4k2c	-0.300814	-0.809659	0.208031	17.0425	-1.18043	0.242089	0.841818	0.629388	-5.19157
Q6RJR6	Rtn3	-0.114763	-0.309011	0.0794851	20.0917	-1.17905	0.242509	0.841818	0.629825	-5.23685
E9PU13	Snx4	0.203261	-0.140865	0.547387	17.9213	1.17875	0.242626	0.841818	0.629825	-5.23717
F1M4K6	Lrrc7	-0.122845	-0.330929	0.0852393	18.3031	-1.17816	0.242861	0.841818	0.63016	-5.23781
P84100	Rpl19	0.177613	-0.123346	0.478571	19.0289	1.17775	0.243023	0.841818	0.630169	-5.23826
P04692-5	Tpm1	-0.10984	-0.296066	0.0763854	20.1063	-1.17709	0.243286	0.841818	0.63044	-5.23897
F1LYQ8	Farp1	-0.3136	-0.845539	0.21834	17.9301	-1.17684	0.243444	0.841818	0.630678	-5.2392
P18422	Psma3	0.140634	-0.097901	0.379169	18.3823	1.17659	0.243484	0.841818	0.630678	-5.23951
G3V6Y6	Pygb	-0.127536	-0.344173	0.0891005	21.5806	-1.17487	0.244168	0.84266	0.631353	-5.24137
Q68FX3	Ddx19a	-0.224648	-0.606942	0.157646	16.9397	-1.17303	0.244958	0.84266	0.631995	-5.2433
Q01986	Map2k1	-0.0942683	-0.25468	0.0661437	20.0539	-1.17278	0.244999	0.84266	0.631995	-5.24362
E2RUH2	Rnh1	-0.156999	-0.424884	0.110886	18.4074	-1.16959	0.246269	0.845567	0.633491	-5.24704
O35179	Sh3gl2	-0.0975078	-0.264169	0.0691536	21.3859	-1.16759	0.247071	0.846153	0.633957	-5.24918
P68403-2	Prkcb	-0.0869287	-0.235578	0.0617208	20.0753	-1.16704	0.247291	0.846153	0.633957	-5.24977
B2RYP4	Snx2	-0.0980054	-0.266263	0.0702526	17.317	-1.16241	0.249152	0.846569	0.63648	-5.25472
Q920Q0	Palm	-0.143181	-0.389263	0.102902	20.3271	-1.16116	0.24966	0.846569	0.636982	-5.25606
F1LRZ7	Nefh	-0.1832	-0.498221	0.131821	21.0275	-1.16057	0.249895	0.846569	0.637048	-5.25668
O35314	Chgb	0.297717	-0.214668	0.810102	17.1862	1.15988	0.250237	0.846569	0.637115	-5.25738
P22062	Pcmt1	-0.171917	-0.467819	0.123985	19.7899	-1.15947	0.250342	0.846569	0.637115	-5.25786
A0A0G2K3Z9	Prdx1	0.13568	-0.0981685	0.369529	19.8446	1.15789	0.25098	0.846569	0.637375	-5.25953
G3V746	Grin2b	-0.118611	-0.323258	0.0860355	18.3683	-1.15666	0.251478	0.846569	0.637375	-5.26084
F1LMZ8	Psmd11	0.119894	-0.0869688	0.326757	18.0998	1.15665	0.251484	0.846569	0.637375	-5.26085
A0A0G2K459		-0.145885	-0.397622	0.105852	19.4289	-1.15651	0.25154	0.846569	0.637375	-5.261
Q5U318	Pea15	-0.171131	-0.46679	0.124528	19.3934	-1.15511	0.252108	0.846569	0.638189	-5.26248
G3V6Q6	Gna11	-0.1497	-0.408476	0.109075	18.7618	-1.15448	0.252366	0.846569	0.638435	-5.26315
Q3KRD5	Tomm34	0.150055	-0.10942	0.409531	18.3377	1.15409	0.252523	0.846569	0.638561	-5.26356
O35567	Atic	-0.0800441	-0.219219	0.0591312	19.2019	-1.14777	0.255108	0.850067	0.641426	-5.27025
P45479	Ppt1	-0.217359	-0.595466	0.160748	18.0824	-1.14723	0.25533	0.850067	0.641578	-5.27081
P19490	Gria1	0.101811	-0.0755771	0.279199	19.6612	1.1454	0.256081	0.850067	0.641843	-5.27274
Q80W89	Ndufa11	-0.130724	-0.358675	0.0972273	18.367	-1.14446	0.256468	0.850067	0.64215	-5.27373
E9PTW1	Scamp3	0.536802	-0.400031	1.47363	17.626	1.14517	0.256495	0.850067	0.64215	-5.24069
A0A0G2JV31		-0.102926	-0.282447	0.0765947	18.5264	-1.14419	0.256579	0.850067	0.64215	-5.27401
G3V792	Dync1i1	-0.10779	-0.295857	0.0802766	19.174	-1.14381	0.256734	0.850067	0.642401	-5.27441
F1M471	Epm2aip1	-0.103272	-0.283701	0.0771575	17.3153	-1.14225	0.257377	0.850067	0.642975	-5.27605
P04642	Ldha	0.0862279	-0.0645673	0.237023	21.9412	1.14116	0.257827	0.850067	0.643421	-5.27719
Q6P7Q4	Glo1	-0.118362	-0.325446	0.0887216	20.1383	-1.14065	0.258037	0.850067	0.643635	-5.27772
F1M4A4	Kif1a	-0.111717	-0.307271	0.0838371	18.461	-1.14009	0.25827	0.850067	0.643947	-5.27831
Q63092	Camkv	-0.152417	-0.419834	0.115001	20.9394	-1.13744	0.259366	0.850293	0.644117	-5.28108
A0A0G2K6X9	Adk	-0.1679	-0.462752	0.126952	18.6204	-1.1364	0.259798	0.850293	0.644513	-5.28216
D4A746	Gmppb	0.334722	-0.253981	0.923425	17.4743	1.1367	0.260065	0.850293	0.64465	-5.26427
G3V734	Decr1	-0.183818	-0.506978	0.139342	17.6073	-1.13516	0.260315	0.850293	0.644867	-5.28346
P47942	Dpysl2	-0.126688	-0.349733	0.0963569	23.6835	-1.13352	0.260997	0.850293	0.645754	-5.28517
O88954	Mpp3	-0.237301	-0.655234	0.180632	17.434	-1.13313	0.26116	0.850293	0.645754	-5.28557
F1MA36	Sptbn2	-0.0606263	-0.167565	0.0463128	20.8195	-1.13139	0.261888	0.850293	0.646331	-5.28739
F1LNF1	Hnrnpa2b1	-0.11711	-0.323702	0.0894821	21.7358	-1.13127	0.261935	0.850293	0.646331	-5.28751
D3ZBE5	Nek7	-0.216532	-0.599439	0.166376	16.0919	-1.13054	0.26263	0.850293	0.646632	-5.26784
F1LS72	Uba2	0.158666	-0.121718	0.43905	17.1237	1.12963	0.262682	0.850293	0.646632	-5.27876
Q5XIF6	Tuba4a	-0.134613	-0.37264	0.103413	22.3869	-1.12862	0.263043	0.850293	0.646791	-5.29025
F7EN52	Cyp46a1	-0.158465	-0.439429	0.1225	17.0369	-1.12556	0.26433	0.853065	0.648484	-5.29343
P86182	Ccdc22	-0.232879	-0.647871	0.182113	16.3005	-1.12052	0.266576	0.858921	0.651449	-5.27226
F8WFW5	Pde2a	-0.161426	-0.449703	0.126852	20.0087	-1.1175	0.267733	0.860048	0.652938	-5.30173
A0A0G2JZM8	Clasp2	-0.162302	-0.452421	0.127818	18.4071	-1.11643	0.268188	0.860048	0.653513	-5.30283
D3ZD97	Dhx15	-0.318718	-0.889111	0.251674	17.7337	-1.11542	0.268676	0.860048	0.654169	-5.28647
Q62634	Slc17a7	-0.139637	-0.389718	0.110444	21.4067	-1.11431	0.269089	0.860048	0.654209	-5.305
G3V6P7	LOC100911597	0.116266	-0.0919587	0.32449	18.3141	1.11431	0.269089	0.860048	0.654209	-5.305
A0A0H2UHQ1	Rpl17	0.117568	-0.0932147	0.32835	19.6219	1.11312	0.269599	0.860292	0.65441	-5.30623
A0A140TAH1	Hgs	-0.352373	-0.985148	0.280402	18.5828	-1.11132	0.270365	0.860501	0.655179	-5.30806
A0A0H2UHQ8	LOC100364909	-0.197952	-0.553549	0.157645	18.7518	-1.11094	0.27053	0.860501	0.655204	-5.30846
F1MAQ5	Map2	-0.574718	-1.60985	0.460409	17.8589	-1.10929	0.271479	0.861303	0.656571	-5.30992
A0JPM9	Eif3j	-0.228975	-0.641332	0.183382	19.2145	-1.10846	0.271648	0.861303	0.656575	-5.31094
Q5RJR8	Lrrc59	0.104692	-0.0846939	0.294078	17.5905	1.1032	0.273851	0.863096	0.659233	-5.31633
D4A0T0	Ndufb10	-0.0860903	-0.24195	0.0697692	19.4561	-1.10232	0.274229	0.863096	0.659415	-5.31722
B4F774	Gdap1l1	-0.0830458	-0.233413	0.0673214	18.9105	-1.10218	0.274291	0.863096	0.659415	-5.31737
P11505-4	Atp2b1	-0.0968262	-0.272211	0.0785588	20.2754	-1.10176	0.274471	0.863096	0.659659	-5.31779
G3V8B3	LOC100910200	-0.170919	-0.480761	0.138924	21.296	-1.10087	0.274857	0.863096	0.659985	-5.31869
Q5XIN6	Letm1	0.0926883	-0.0755427	0.260919	19.6154	1.09953	0.275437	0.863096	0.660516	-5.32005
Q3ZBA0	Tecpr1	-0.216691	-0.610497	0.177116	17.2653	-1.0981	0.276052	0.863096	0.661328	-5.32149
O08839-2	Bin1	-0.129497	-0.365327	0.106333	19.6151	-1.09584	0.277036	0.863096	0.662355	-5.32377
A0A0H2UHV9	Copg2	0.231885	-0.190717	0.654487	17.2772	1.09596	0.277163	0.863096	0.662391	-5.30609
P09527	Rab7a	0.13874	-0.114174	0.391653	19.2999	1.09475	0.277509	0.863096	0.662665	-5.32487
P97536	Cand1	-0.175026	-0.494189	0.144138	20.0828	-1.0944	0.277662	0.863096	0.662665	-5.32522
O35274	Ppp1r9b	-0.0991938	-0.280129	0.0817412	18.7851	-1.09408	0.277801	0.863096	0.662855	-5.32554
P26453-2	Bsg	0.15929	-0.131427	0.450006	19.3575	1.09347	0.278068	0.863096	0.663189	-5.32616
B4F7A3	Lgalsl	-0.25515	-0.721463	0.211164	17.3808	-1.09195	0.278729	0.863096	0.663273	-5.32768
A0A0G2K6X6	Mark2	-0.12607	-0.356517	0.104377	17.5381	-1.09176	0.278811	0.863096	0.663273	-5.32787
P35571	Gpd2	-0.107235	-0.303526	0.0890553	19.3415	-1.09025	0.279473	0.863096	0.664055	-5.32939
P07936	Gap43	-0.253907	-0.718793	0.210979	20.7608	-1.08997	0.279594	0.863096	0.664211	-5.32967
P06686	Atp1a2	-0.0600008	-0.170023	0.0500211	21.6967	-1.08834	0.280308	0.863449	0.664394	-5.33131
Q6T487	Actn1	-0.223706	-0.634143	0.18673	19.6308	-1.08772	0.280577	0.863449	0.664658	-5.33192
Q5RK08	Gbas	-0.133597	-0.379364	0.112171	19.1073	-1.08482	0.281852	0.865493	0.666317	-5.33482
P62828	Ran	-0.097605	-0.277345	0.0821352	20.5215	-1.08371	0.282341	0.865493	0.666945	-5.33593
Q5U2X8	Acot9	-0.105182	-0.299045	0.0886801	18.0123	-1.08277	0.282756	0.865493	0.667202	-5.33687
Q9Z1B2	Gstm5	-0.237058	-0.6742	0.200085	18.1549	-1.08223	0.282995	0.865493	0.667379	-5.33741
P19627	Gnaz	-0.153622	-0.437157	0.129913	19.2544	-1.08127	0.283418	0.865493	0.66754	-5.33836
P40329	Rars	0.0913535	-0.0779914	0.260698	18.0264	1.07656	0.2855	0.869637	0.669522	-5.34303
P56574	Idh2	-0.137098	-0.391436	0.11724	20.0668	-1.07574	0.285866	0.869637	0.66953	-5.34385
G3V852	Tln1	0.385407	-0.329914	1.10073	16.5149	1.07524	0.286088	0.869637	0.66953	-5.34434
Q78PB6-2	Ndel1	0.299902	-0.259602	0.859406	15.8226	1.07093	0.288247	0.873586	0.671918	-5.29784
P37996	Arl3	0.128262	-0.110929	0.367453	17.563	1.07014	0.288361	0.873586	0.671931	-5.34938
F1MA97	Thsd7a	-0.213651	-0.612782	0.18548	17.4611	-1.06885	0.289052	0.873586	0.672392	-5.3505
Q5U2P5	C2cd2l	0.0999687	-0.086765	0.286702	17.5625	1.06839	0.289145	0.873586	0.672392	-5.35111
G3V9T7	Asna1	-0.173809	-0.499316	0.151697	17.8658	-1.06561	0.290388	0.873757	0.672964	-5.35383
F1LQV9	Lin7a	-0.114227	-0.32822	0.0997666	19.8452	-1.06526	0.290548	0.873757	0.673071	-5.35418
P21575	Dnm1	-0.0704993	-0.202652	0.0616534	22.4795	-1.06462	0.290833	0.873757	0.673071	-5.3548
P18484	Ap2a2	-0.100517	-0.289093	0.0880584	20.761	-1.06376	0.291222	0.873757	0.673169	-5.35565
Q5EGY4	Ykt6	0.247324	-0.217429	0.712078	16.7031	1.06291	0.291776	0.873757	0.673417	-5.35605
A0A0G2JUC7	Dctn2	-0.0781915	-0.225163	0.0687797	19.2743	-1.06173	0.292134	0.873757	0.673417	-5.35763
Q3ZAU6	Rnf14	-0.155088	-0.44717	0.136994	17.7979	-1.05965	0.293075	0.873757	0.673997	-5.35967
D4AD82	Arhgap35	-0.14069	-0.405728	0.124348	16.8749	-1.05935	0.293207	0.873757	0.673997	-5.35995
Q4G061	Eif3b	0.255065	-0.22554	0.735669	16.5856	1.05913	0.293308	0.873757	0.6741	-5.36017
D4A601	Taco1	-0.22454	-0.649185	0.200106	16.2033	-1.0594	0.293993	0.873757	0.67471	-5.28958
D4A4T9	Chordc1	-0.311065	-0.898462	0.276333	16.713	-1.05804	0.294036	0.873757	0.67471	-5.3336
I6L9G6	Tardbp	-0.110762	-0.320151	0.0986268	18.2678	-1.05566	0.294879	0.874954	0.675497	-5.36355
B0BN93	Psmd13	-0.362361	-1.05014	0.325415	18.439	-1.05172	0.296727	0.879126	0.67739	-5.36733
A0A0G2K7C1	Bag6	-0.249418	-0.7235	0.224665	18.2555	-1.04993	0.297488	0.87959	0.678477	-5.36911
A0A0G2K7W6	Rpl27a	0.162341	-0.146683	0.471364	17.8914	1.04839	0.298192	0.87959	0.678939	-5.3706
Q6AY21	G3bp2	0.118786	-0.107338	0.34491	17.9126	1.04835	0.298211	0.87959	0.678939	-5.37064
D3ZI07	Kif3b	-0.16889	-0.491066	0.153286	16.6339	-1.04616	0.299212	0.880161	0.679277	-5.37275
Q6AY84	Scrn1	-0.0595369	-0.173212	0.0541383	19.2199	-1.04522	0.299643	0.880161	0.679623	-5.37365
P19234	Ndufv2	0.238003	-0.216507	0.692514	19.9831	1.04502	0.299733	0.880161	0.679699	-5.37384
Q9EQS0	Taldo1	0.124594	-0.113942	0.36313	19.456	1.04239	0.300942	0.881853	0.68046	-5.37637
A0A0G2K4Y7		-0.0875883	-0.25537	0.0801932	19.4872	-1.04181	0.301209	0.881853	0.68046	-5.37693
P84092	Ap2m1	-0.0824982	-0.241032	0.0760354	21.0324	-1.03851	0.302732	0.881853	0.68159	-5.38009
P53042	Ppp5c	-0.0809737	-0.23658	0.0746324	18.6175	-1.03849	0.302738	0.881853	0.68159	-5.38011
P50398	Gdi1	-0.0663237	-0.193816	0.0611688	22.0548	-1.03818	0.302885	0.881853	0.681669	-5.38041
P47971	Nptx1	-0.123066	-0.359675	0.113543	20.4326	-1.03799	0.302971	0.881853	0.681669	-5.38059
Q9QUR2-2	Dctn4	0.2136	-0.198922	0.626122	18.3539	1.03333	0.305128	0.886793	0.684277	-5.38503
P22734-2	Comt	0.221351	-0.206664	0.649366	17.0896	1.03264	0.30556	0.886793	0.684711	-5.36547
D3ZLC1	Lmnb2	-0.180215	-0.530166	0.169735	16.5979	-1.02771	0.307747	0.890006	0.686763	-5.39037
P62815	Atp6v1b2	0.079874	-0.0752396	0.234988	21.7821	1.02764	0.307779	0.890006	0.686763	-5.39044
P31399	Atp5h	-0.108258	-0.318839	0.102323	21.2456	-1.02595	0.30857	0.890006	0.686773	-5.39204
A0A0G2K7R8	Slc44a1	-0.20518	-0.60454	0.194179	17.9205	-1.02532	0.308866	0.890006	0.686982	-5.39264
Q64559-1	Acot7	-0.12114	-0.35711	0.11483	19.5719	-1.02451	0.309242	0.890006	0.687538	-5.3934
M0R3X6	Cbr1	0.135956	-0.129165	0.401077	19.1441	1.02339	0.30977	0.890006	0.688011	-5.39446
Q566R0	Them4	0.209313	-0.198884	0.617509	18.8328	1.02332	0.309801	0.890006	0.688011	-5.39452
D3ZHI9	Ppp2r5e	-0.0995788	-0.293995	0.0948376	18.4377	-1.02216	0.310345	0.890205	0.688835	-5.39562
G3V918	Gart	-0.272749	-0.807259	0.26176	17.1909	-1.01834	0.312143	0.890205	0.691469	-5.39921
A0A0G2JTW1		0.126828	-0.122073	0.37573	18.4214	1.01746	0.312672	0.890205	0.691469	-5.39995
P15800	Lamb2	-0.169936	-0.503351	0.163479	17.1602	-1.01715	0.312705	0.890205	0.691469	-5.40033
A0A0G2KAS7	Slc1a3	-0.240344	-0.712393	0.231705	19.6948	-1.01609	0.313207	0.890205	0.691469	-5.40132
D4AE96	Ipo7	-0.290007	-0.859637	0.279623	17.0678	-1.01602	0.31324	0.890205	0.691469	-5.40139
D4A5J1	Kbtbd11	-0.152449	-0.452096	0.147198	19.2923	-1.01531	0.313574	0.890205	0.691677	-5.40205
F1LY09	Actr3b	-0.15	-0.44502	0.14502	18.7245	-1.01467	0.313877	0.890205	0.691677	-5.40265
Q66H80	Arcn1	0.138784	-0.134469	0.412036	17.2685	1.01359	0.314391	0.890205	0.692404	-5.40367
F1LQN3	Rtn4	-0.157644	-0.468407	0.153119	19.8542	-1.01236	0.314973	0.890205	0.692766	-5.40481
G3V7U2	Map1a	-0.0468671	-0.139411	0.045677	20.8952	-1.01066	0.315779	0.890205	0.69354	-5.4064
F1MAA3	LOC100909464	-0.191521	-0.570236	0.187195	17.8136	-1.00923	0.316462	0.890205	0.694272	-5.40773
F1LPK7	Pls3	-0.300015	-0.894279	0.294249	16.8556	-1.00807	0.317122	0.890205	0.694471	-5.40871
F1M8A5	Hypk	0.235726	-0.232744	0.704196	16.1587	1.00564	0.318457	0.890205	0.696088	-5.38581
F7F2F3		-0.0949539	-0.283656	0.0937478	19.4821	-1.00421	0.318857	0.890205	0.696441	-5.41239
P62074	Timm10	-0.089566	-0.267618	0.0884859	18.8014	-1.00388	0.319013	0.890205	0.696441	-5.41269
P24368	Ppib	0.404589	-0.401678	1.21086	16.9545	1.00289	0.319772	0.890205	0.69739	-5.39565
O08773	Rgs14	-0.338857	-1.01508	0.337368	16.8698	-1.00087	0.32062	0.890205	0.698147	-5.39077
P28818	Rasgrf1	-0.107132	-0.32083	0.106566	17.5243	-1.00048	0.320646	0.890205	0.698147	-5.41585
Q5QJC9	Bag5	-0.286075	-0.857236	0.285085	16.5332	-1.00101	0.320671	0.890205	0.698147	-5.41505
P54921	Napa	0.145285	-0.144678	0.435247	19.6626	0.99992	0.320913	0.890205	0.698147	-5.41636
M0R402	Tmx3	0.21213	-0.211572	0.635833	17.3355	1.00029	0.320959	0.890205	0.698147	-5.41582
P21913	Sdhb	-0.110007	-0.329592	0.109578	19.8575	-0.999783	0.320979	0.890205	0.698147	-5.41648
D3Z900	Marc2	0.18766	-0.187181	0.5625	18.1863	0.999105	0.321304	0.890205	0.698273	-5.41711
P10824	Gnai1	-0.156133	-0.46804	0.155774	19.8474	-0.998979	0.321365	0.890205	0.698273	-5.41723
D3ZA93	Acot13	-0.284893	-0.854907	0.285121	16.2551	-0.998274	0.321869	0.890205	0.699063	-5.39155
O70257	Stx7	0.2463	-0.246424	0.739024	17.6421	0.997852	0.32196	0.890205	0.699134	-5.40925
Q5U2N2	Usp14	-0.107811	-0.323764	0.108142	17.8969	-0.9963	0.322655	0.890342	0.699469	-5.41969
D3ZX42	Rabgap1	-0.140001	-0.42081	0.140808	17.496	-0.994963	0.323301	0.890342	0.700183	-5.42092
F1LMT5	Pex5l	-0.257133	-0.773171	0.258904	17.1995	-0.994406	0.323569	0.890342	0.700183	-5.42143
D3ZLT1	Ndufb7	-0.141547	-0.425754	0.142659	19.3502	-0.993925	0.323802	0.890342	0.700183	-5.42187
P81377	Prkar1b	0.233347	-0.236563	0.703257	17.3444	0.991003	0.325216	0.890386	0.701225	-5.42455
P07171	Calb1	-0.409681	-1.23554	0.416178	18.3073	-0.989979	0.325712	0.890386	0.701285	-5.42548
A0A0G2K2S2	Slc2a1	0.115931	-0.11794	0.349801	18.6634	0.989258	0.326063	0.890386	0.701797	-5.42614
D3ZC89	Fam114a2	0.146268	-0.149003	0.441539	17.1115	0.98859	0.326387	0.890386	0.701797	-5.42675
A0A0G2JSH9	Prdx2	-0.271532	-0.819675	0.276611	21.5355	-0.988586	0.326389	0.890386	0.701797	-5.42676
D4A8V2	Ccdc177	-0.146724	-0.443192	0.149743	16.9441	-0.987669	0.326835	0.890386	0.70205	-5.42759
P11608	Mt-atp8	0.555207	-0.567279	1.67769	18.9132	0.987646	0.326953	0.890386	0.702051	-5.41683
P08009	Gstm3	-0.161605	-0.4892	0.165989	20.2904	-0.984478	0.328389	0.891556	0.703587	-5.4305
P05370	G6pdx	-0.121733	-0.368727	0.12526	17.96	-0.983583	0.328826	0.891556	0.703712	-5.43131
Q04940	Nrgn	-0.26999	-0.81826	0.278281	21.2243	-0.982741	0.329237	0.891556	0.703977	-5.43207
D4A208	Srgap2	-0.206975	-0.627647	0.213697	16.9096	-0.983012	0.329324	0.891556	0.703977	-5.43163
P06687	Atp1a3	-0.0446004	-0.135244	0.0460431	23.8901	-0.981948	0.329625	0.891556	0.704039	-5.43279
Q68FT7	Farsb	-0.129915	-0.394644	0.134815	17.872	-0.979359	0.330892	0.892556	0.70524	-5.43514
M0RAX4	Gnb5	-0.148158	-0.450528	0.154213	18.6871	-0.977849	0.331634	0.892556	0.706001	-5.4365
M0R4R4	Gas7	-0.162289	-0.493629	0.169051	16.9918	-0.977467	0.331821	0.892556	0.706274	-5.43685
M0RBE5	Nrn1	-0.252852	-0.770155	0.264451	18.0086	-0.976574	0.332478	0.892556	0.707259	-5.43741
F1M7V4	Pclo	-0.193978	-0.591227	0.20327	16.7666	-0.976542	0.332676	0.892556	0.707259	-5.38149
P62329	Tmsb4x	-0.137351	-0.418282	0.14358	23.7613	-0.975704	0.332688	0.892556	0.707259	-5.43844
Q6P3V8	Eif4a1	0.0892908	-0.0939566	0.272538	18.8713	0.972424	0.334305	0.893273	0.708566	-5.44139
Q505J8	Farsa	-0.24636	-0.752997	0.260276	16.3975	-0.973497	0.334374	0.893273	0.708566	-5.37801
P63319	Prkcg	-0.0634315	-0.19363	0.0667673	21.4004	-0.972265	0.334383	0.893273	0.708566	-5.44153
P20788	Uqcrfs1	-0.146146	-0.446354	0.154062	19.3572	-0.971516	0.334753	0.893273	0.70872	-5.4422
B2RYW9	Fahd2	-0.147948	-0.452712	0.156816	19.2409	-0.968795	0.336099	0.894714	0.709461	-5.44464
Q6AYU5	Pcbp2	0.131647	-0.139611	0.402906	19.6004	0.968535	0.336228	0.894714	0.709461	-5.44487
A0A0G2K5C8	Stim1	0.267398	-0.284142	0.818938	15.6777	0.967802	0.336643	0.894714	0.710196	-5.44548
P68511	Ywhah	-0.136525	-0.419227	0.146178	22.2353	-0.963758	0.3386	0.897597	0.711124	-5.44913
F1LMD9	Gak	0.229826	-0.246438	0.70609	16.6168	0.964129	0.338631	0.897597	0.711124	-5.44855
P45592	Cfl1	-0.0878646	-0.270078	0.0943488	23.7415	-0.962322	0.339316	0.898215	0.711686	-5.45041
Q9QY17-2	Pacsin2	-0.200876	-0.618574	0.216821	18.0066	-0.95974	0.340604	0.899542	0.71346	-5.4527
D4A5I9	Myo6	-0.13394	-0.412622	0.144742	17.7488	-0.959151	0.340899	0.899542	0.713751	-5.45322
A0A0G2K1I6	Scamp1	-0.121597	-0.375114	0.131919	18.8096	-0.957202	0.341874	0.899542	0.714518	-5.45495
P07943	Akr1b1	-0.105116	-0.324293	0.114062	19.6285	-0.957102	0.341924	0.899542	0.714518	-5.45504
F7FHF7	LOC100911485	-0.162303	-0.501008	0.176402	17.2819	-0.956293	0.34233	0.899542	0.714615	-5.45575
B5DF91	Elavl1	-0.197285	-0.609263	0.214692	17.2829	-0.95567	0.342642	0.899542	0.714783	-5.4563
Q5PPJ6	Lars	0.209423	-0.228213	0.647059	16.8927	0.954988	0.342984	0.899542	0.714855	-5.4569
P11507-2	Atp2a2	-0.0662782	-0.205291	0.0727342	20.3271	-0.951489	0.344744	0.900359	0.71681	-5.45999
Q6JE36	Ndrg1	0.157339	-0.172848	0.487526	17.7541	0.951223	0.344929	0.900359	0.7169	-5.46017
Q6AYE2	Sh3glb1	0.292101	-0.32111	0.905312	16.4764	0.950885	0.345099	0.900359	0.7169	-5.46047
B1WC33	Cdc42ep4	0.330198	-0.363783	1.02418	17.9236	0.95154	0.345107	0.900359	0.7169	-5.45054
Q4V7A0	Wdr61	-0.216934	-0.673462	0.239595	16.3338	-0.948827	0.346189	0.901996	0.717772	-5.46223
Q5BJU0	Rras2	-0.360692	-1.12311	0.401727	15.9728	-0.947116	0.347533	0.904314	0.718787	-5.44489
Q9QYW3	Mob4	-0.150266	-0.468307	0.167774	17.6407	-0.9429	0.349088	0.905007	0.719607	-5.4675
P46462	Vcp	-0.0522841	-0.162955	0.0583871	20.8209	-0.942805	0.349136	0.905007	0.719607	-5.46759
A0A0H2UHE5	Ppm1a	0.270581	-0.302314	0.843476	17.4621	0.94256	0.34926	0.905007	0.719607	-5.4678
D4A7U1	Zyx	0.303255	-0.340873	0.947382	17.6213	0.940922	0.350359	0.905007	0.720735	-5.44853
Q91Y81	Sept2	-0.0598651	-0.186943	0.0672129	20.0909	-0.940134	0.350494	0.905007	0.720735	-5.46991
D4ABM3	Daam1	-0.187206	-0.584627	0.210215	16.6892	-0.940062	0.350531	0.905007	0.720735	-5.46997
Q52KS1	Pfkm	-0.0660457	-0.206481	0.0743898	20.7464	-0.938543	0.351305	0.905829	0.721328	-5.47129
Q5XIE6	Hibch	-0.0968774	-0.304102	0.110347	17.4993	-0.932972	0.354153	0.910895	0.723254	-5.47611
F1LMB9	Exoc2	-0.297731	-0.936485	0.341023	16.656	-0.930203	0.355574	0.910895	0.72418	-5.4785
A0A0G2JWA8	Macf1	-0.0847605	-0.266745	0.0972237	18.0971	-0.929494	0.355938	0.910895	0.72418	-5.47911
D3ZDK7	Pgp	-0.19342	-0.608875	0.222036	17.8007	-0.929616	0.355976	0.910895	0.72418	-5.44972
Q5XIJ3	Idh3g	-0.0674265	-0.212215	0.0773616	19.9757	-0.929361	0.356007	0.910895	0.72418	-5.47922
F1M9B5	Atp2c1	0.196224	-0.225219	0.617666	16.9506	0.929434	0.356019	0.910895	0.72418	-5.44877
F7EUU4		-0.214276	-0.676489	0.247938	17.1836	-0.925161	0.358171	0.91407	0.724817	-5.48282
P17105	Itpka	-0.0892909	-0.28204	0.103458	19.0979	-0.924489	0.358518	0.91407	0.725059	-5.4834
A0A0G2K2V2	Ap1b1	0.121446	-0.140781	0.383672	18.7061	0.924255	0.358639	0.91407	0.725059	-5.4836
Q9WVR7	Ppm1f	-0.286935	-0.907233	0.333363	17.2147	-0.923397	0.359132	0.914153	0.725392	-5.48407
A0A0G2K9A9	Fbxo41	-0.253247	-0.803174	0.29668	17.0304	-0.920074	0.361008	0.916022	0.727015	-5.45749
D3ZJF9	Gla	0.131239	-0.15407	0.416549	16.596	0.918492	0.361724	0.916022	0.72763	-5.4679
D4A3C2	RGD1304884	-0.0743877	-0.236072	0.0872965	18.3323	-0.918164	0.361796	0.916022	0.72763	-5.48879
P13233	Cnp	-0.170168	-0.540085	0.19975	21.5232	-0.918035	0.361863	0.916022	0.72763	-5.4889
P35439	Grin1	-0.183178	-0.581635	0.215279	17.6308	-0.917444	0.36217	0.916022	0.727983	-5.4894
P68255	Ywhaq	-0.105783	-0.336161	0.124596	21.7719	-0.916345	0.362741	0.916195	0.728503	-5.49033
Q6P2A5	Ak3	-0.203908	-0.648593	0.240777	17.7897	-0.915351	0.363308	0.916195	0.72906	-5.49108
F1LP57	Map2k4	-0.115383	-0.367258	0.136492	18.2564	-0.914206	0.363856	0.916195	0.729547	-5.49214
P29266	Hibadh	-0.128042	-0.40885	0.152766	19.1329	-0.909976	0.366066	0.916195	0.732379	-5.49571
Q2IBD4-2	Cttnbp2	-0.0994629	-0.317663	0.118737	18.4177	-0.909688	0.366217	0.916195	0.732418	-5.49595
G3V940	Coro1b	-0.124969	-0.399315	0.149377	19.4728	-0.909056	0.366548	0.916195	0.732418	-5.49648
G3V8B6	Psmd1	-0.229149	-0.73377	0.275471	17.7659	-0.906234	0.368029	0.916195	0.732986	-5.49885
A0A0G2K8R3		-0.216673	-0.694236	0.26089	17.1747	-0.906207	0.368192	0.916195	0.73304	-5.49873
M0RD40	Sik3	-0.137166	-0.439516	0.165184	17.3159	-0.905363	0.368487	0.916195	0.73304	-5.49958
P06761	Hspa5	0.097248	-0.117294	0.31179	20.306	0.904595	0.36889	0.916195	0.733477	-5.50022
Q6IN39	Hsd17b4	-0.0993127	-0.319273	0.120648	16.7776	-0.901046	0.370761	0.916195	0.735096	-5.50319
P63331	Ppp2ca	-0.172021	-0.553454	0.209413	19.1958	-0.900011	0.371307	0.916195	0.735096	-5.50405
F1LND7	Fdps	-0.149882	-0.482709	0.182945	16.7106	-0.898706	0.371997	0.916195	0.73576	-5.50514
G3V7V9	Lcmt1	-0.183992	-0.593402	0.225418	16.9137	-0.896865	0.372972	0.916195	0.736807	-5.50667
A0A0G2K1M2	Dlg1	-0.152643	-0.492343	0.187057	17.4135	-0.896743	0.373037	0.916195	0.736807	-5.50677
G3V714	Scg5	0.11153	-0.137227	0.360287	18.8664	0.894753	0.374092	0.916195	0.737709	-5.50842
F7FKI5	Pdha1	0.0627732	-0.0773476	0.202894	21.145	0.894043	0.374469	0.916195	0.737709	-5.50901
P00406	Mtco2	0.258843	-0.31923	0.836915	21.1976	0.893594	0.374708	0.916195	0.737709	-5.50938
A0A0G2JSV6		0.181604	-0.22402	0.587228	20.8734	0.893489	0.374763	0.916195	0.737709	-5.50946
F1M853	Rrbp1	-0.147573	-0.477583	0.182436	16.2533	-0.892418	0.375333	0.916195	0.738043	-5.51035
Q91ZW1	Tfam	0.236926	-0.294599	0.768451	17.6304	0.890055	0.376687	0.916195	0.738615	-5.51221
G3V984	Bsn	-0.0835353	-0.270936	0.103865	20.2328	-0.889582	0.376843	0.916195	0.738615	-5.51269
P26431	Slc9a1	-0.242762	-0.787579	0.302055	16.3328	-0.889728	0.376861	0.916195	0.738615	-5.49535
P43425	Gng7	-0.332945	-1.0807	0.414811	18.3453	-0.889877	0.376937	0.916195	0.738615	-5.4914
A0A0A0MXW3	H2afz	-0.305939	-0.993255	0.381378	17.9117	-0.889061	0.377267	0.916195	0.738615	-5.51277
Q9QYU2	Tsfm	-0.220548	-0.716402	0.275306	17.0845	-0.888932	0.377441	0.916195	0.738615	-5.49237
Q9JLU4-2	Shank3	-0.102503	-0.332863	0.127857	18.179	-0.888004	0.377686	0.916195	0.738695	-5.51399
A0A0H2UHQ3	Map1s	0.105627	-0.131766	0.34302	17.35	0.887961	0.377708	0.916195	0.738695	-5.51402
M0R9I6	Amt	-0.210266	-0.683618	0.263087	15.9909	-0.88835	0.377863	0.916195	0.738877	-5.41968
D4A8U7	Dctn1	-0.0720714	-0.234379	0.0902363	18.4812	-0.886157	0.378673	0.916195	0.739086	-5.5155
A0A0G2K4A0		0.258282	-0.323917	0.840481	16.7186	0.885339	0.37911	0.916195	0.739086	-5.51617
Q6AY65	Arfip2	-0.117144	-0.381319	0.147031	16.784	-0.885185	0.37924	0.916195	0.739086	-5.51625
B2RYJ7	Actr1b	-0.0781476	-0.254384	0.0980892	19.5129	-0.884923	0.379333	0.916195	0.739086	-5.51651
F1LNK0	Map2	-0.0553916	-0.180376	0.0695933	21.5478	-0.88445	0.379587	0.916195	0.739218	-5.5169
A0A0G2JT06	Gps1	-0.0934228	-0.30467	0.117824	17.502	-0.88257	0.380594	0.916195	0.739474	-5.51844
P97685	Nfasc	-0.0580787	-0.189441	0.0732832	20.4816	-0.882337	0.38072	0.916195	0.739474	-5.51863
D3ZML2-2	Brsk2	-0.13788	-0.449766	0.174005	16.8195	-0.882254	0.380764	0.916195	0.739474	-5.5187
P20651	Ppp3cb	-0.109845	-0.358333	0.138643	19.2614	-0.882186	0.3808	0.916195	0.739474	-5.51875
P16446	Pitpna	-0.0986367	-0.321772	0.124499	19.0645	-0.882179	0.380804	0.916195	0.739474	-5.51876
B2RYS8	Ndufb8	-0.131342	-0.428848	0.166165	20.1478	-0.881033	0.38142	0.916195	0.740009	-5.51969
A0A0G2JT63	Cyfip2	0.0670617	-0.0853994	0.219523	19.5772	0.877814	0.383152	0.916195	0.74161	-5.52232
Q4V7D9	Smpdl3b	0.18005	-0.229605	0.589706	16.9304	0.877612	0.383355	0.916195	0.74161	-5.52209
M0RDX2	Aplp2	0.215627	-0.275689	0.706943	15.9799	0.878302	0.383364	0.916195	0.74161	-5.43414
Q5XIG0	Nudt9	-0.296631	-0.97194	0.378679	16.4861	-0.877601	0.383461	0.916195	0.741678	-5.45491
A0A0G2K9N0	Smap2	-0.366267	-1.20126	0.468722	16.5596	-0.877537	0.383716	0.916195	0.74169	-5.52181
Q91V33	Khdrbs1	0.234123	-0.299921	0.768167	16.9101	0.87489	0.38473	0.916195	0.742686	-5.52469
Q5BJZ3	Nnt	-0.138801	-0.45541	0.177809	18.5381	-0.87489	0.38473	0.916195	0.742686	-5.52469
P0CC09	Hist2h2aa3	-0.180701	-0.5932	0.231799	23.8589	-0.874225	0.385089	0.916195	0.742903	-5.52523
Q812E9	Gpm6a	-0.345854	-1.13658	0.444872	18.8688	-0.872879	0.385817	0.916195	0.743178	-5.52632
P13264	Gls	0.115949	-0.149793	0.38169	19.905	0.87075	0.386971	0.916195	0.743968	-5.52804
Q6AYS2	Sfxn1	-0.0821435	-0.270534	0.106247	19.2505	-0.870162	0.387289	0.916195	0.744015	-5.52851
Q6P6T6	Ctsd	0.143545	-0.186345	0.473434	20.9497	0.86837	0.388262	0.916195	0.74536	-5.52995
D4A559	Dmtn	-0.101087	-0.33342	0.131247	18.5347	-0.868297	0.388302	0.916195	0.74536	-5.53001
F1LXQ7	Arhgap21	0.169729	-0.220815	0.560273	19.3611	0.867546	0.388756	0.916195	0.745392	-5.53057
P0C170	Hist1h2ac	0.260677	-0.339578	0.860933	20.5514	0.86667	0.389187	0.916195	0.745618	-5.53132
G3V6P8	Gng12	0.291098	-0.380323	0.96252	17.523	0.86571	0.389802	0.916195	0.746239	-5.532
Q6P9Y4	Slc25a4	0.099624	-0.130612	0.32986	21.5652	0.863531	0.390897	0.916195	0.747068	-5.53383
A0A0G2K293	Negr1	-0.161233	-0.533887	0.211422	18.7046	-0.863442	0.390946	0.916195	0.747068	-5.5339
F1M964	Pmpca	-0.221861	-0.734933	0.291211	16.1042	-0.863436	0.391042	0.916195	0.747132	-5.53382
G3V6H0	LOC100363782	0.088935	-0.11692	0.29479	19.0315	0.86218	0.391635	0.916195	0.747777	-5.53491
D3ZUX5	Chchd3	-0.121539	-0.402929	0.159852	18.7689	-0.861969	0.39175	0.916195	0.747777	-5.53508
F8WFM2	Napb	0.0971741	-0.127807	0.322156	20.5226	0.861966	0.391752	0.916195	0.747777	-5.53508
Q6AY56	Tuba8	0.304356	-0.401062	1.00977	18.5371	0.861272	0.392177	0.916195	0.748142	-5.53559
A0A0G2K6S9	Myh11	0.47869	-0.632475	1.58985	16.9935	0.85973	0.392975	0.916195	0.748427	-5.53687
B5DF41	Snph	-0.0830732	-0.276141	0.109995	18.711	-0.858692	0.393543	0.916195	0.748945	-5.53769
Q9R0I8	Pip4k2a	-0.160087	-0.532581	0.212407	16.5249	-0.857912	0.394016	0.916195	0.749215	-5.53823
A0A140TAC3	Epn1	-0.113829	-0.378684	0.151027	18.9621	-0.857688	0.394094	0.916195	0.749242	-5.53849
Q02356	Ampd2	0.0914936	-0.121487	0.304474	19.619	0.857308	0.394302	0.916195	0.7494	-5.53879
Q6IMY8	Hnrnpu	0.0668516	-0.0890732	0.222776	19.8442	0.855624	0.395226	0.916195	0.750081	-5.54013
B0BN65	Fam49a	0.116104	-0.154788	0.386996	18.5142	0.855339	0.395383	0.916195	0.750208	-5.54035
P49620	Dgkg	-0.288804	-0.964837	0.387228	16.3826	-0.854643	0.396169	0.916195	0.751034	-5.48653
F1LSC8	Rimbp2	0.131667	-0.176208	0.439543	18.579	0.853472	0.39641	0.916195	0.751252	-5.54183
F1M9N7	Agfg1	0.156727	-0.210694	0.524148	16.7665	0.852245	0.397274	0.916195	0.75208	-5.54261
Q5XI39	Cryzl1	-0.200212	-0.66987	0.269447	16.2734	-0.851972	0.397475	0.916195	0.752194	-5.51526
Q66H12	Naga	-0.223734	-0.748526	0.301058	17.4723	-0.851527	0.39762	0.916195	0.75235	-5.54302
P84586	Rbmxrtl	0.0823151	-0.11101	0.27564	17.6179	0.849724	0.398476	0.916195	0.753101	-5.54479
D3ZW55	Itpa	-0.132075	-0.442298	0.178147	18.3121	-0.849641	0.398522	0.916195	0.753101	-5.54486
P41123	Rpl13	0.160247	-0.216363	0.536857	18.2434	0.849151	0.398792	0.916195	0.753422	-5.54524
Q6P6T4-2	Eml2	-0.137267	-0.460163	0.185628	16.383	-0.848615	0.399134	0.916195	0.75366	-5.54562
P02091	Hbb	-0.220154	-0.738143	0.297836	23.8153	-0.848187	0.399326	0.916195	0.753737	-5.546
P63090	Ptn	-0.12366	-0.414794	0.167474	17.522	-0.847664	0.399614	0.916195	0.75397	-5.54641
P85515	Actr1a	-0.144313	-0.48437	0.195744	18.3287	-0.846916	0.400029	0.916195	0.754258	-5.547
R9PXU6	Vcl	-0.170851	-0.573962	0.23226	17.49	-0.845824	0.400633	0.916524	0.754488	-5.54785
P10760	Ahcy	-0.0725235	-0.244641	0.0995944	19.5292	-0.840891	0.403372	0.921679	0.756989	-5.55171
A0A0H2UHZ2	Nap1l4	-0.0776825	-0.262218	0.106853	19.1056	-0.840096	0.403814	0.921679	0.757461	-5.55233
D4A3D9	Stk32c	0.285873	-0.394403	0.966148	17.3497	0.839104	0.404457	0.921694	0.757951	-5.55272
F1LPV0	Nars	0.0647001	-0.0894702	0.21887	18.5793	0.837512	0.405254	0.921694	0.758205	-5.55434
F1LQ26	Rapgef4	-0.218559	-0.740254	0.303136	16.3582	-0.838109	0.405316	0.921694	0.758205	-5.47729
D4ACB8	Cct8	-0.101483	-0.343664	0.140698	19.1983	-0.836256	0.405955	0.921694	0.758733	-5.55531
F1M7L9		-0.213197	-0.722555	0.296162	15.716	-0.836258	0.406139	0.921694	0.758838	-5.52529
G3V7Y3	Atp5d	-0.140692	-0.477111	0.195727	20.8048	-0.834593	0.406885	0.921811	0.758948	-5.5566
F1LNP8	Pvrl1	-0.13558	-0.460239	0.18908	17.4609	-0.833398	0.407554	0.921811	0.759104	-5.55752
A0A0G2K2M9		-0.170527	-0.579391	0.238336	17.6482	-0.832804	0.407975	0.921811	0.759314	-5.55789
P85968	Pgd	0.123718	-0.17294	0.420376	18.0076	0.832266	0.408188	0.921811	0.759314	-5.5584
D4A5L9	LOC679794	0.221632	-0.310208	0.753471	19.3387	0.831644	0.408536	0.921811	0.759314	-5.55888
P05708	Hk1	-0.0472966	-0.160952	0.0663588	21.6633	-0.830475	0.409192	0.921811	0.759783	-5.55978
Q68FU3	Etfb	-0.149514	-0.509767	0.21074	17.7068	-0.828245	0.410445	0.921811	0.760613	-5.56149
A0A0G2K4G3	Nedd8	-0.21055	-0.717903	0.296802	19.6551	-0.828195	0.410473	0.921811	0.760613	-5.56153
P62859	Rps28	0.185284	-0.2613	0.631867	17.8747	0.827982	0.410592	0.921811	0.760613	-5.5617
Q3KRE2	Mettl7a	0.298472	-0.423474	1.02042	16.4079	0.827987	0.411153	0.921811	0.761173	-5.53297
C0JPT7	Flna	0.980632	-1.39137	3.35264	15.179	0.826781	0.411602	0.921811	0.761608	-5.50805
D4A3I4	Btf3l4	0.202847	-0.288286	0.693981	17.1114	0.825708	0.412154	0.921811	0.761608	-5.53332
P12075	Cox5b	0.351333	-0.49859	1.20126	19.4658	0.825172	0.412218	0.921811	0.761608	-5.56381
P31016	Dlg4	-0.0629078	-0.215293	0.0894771	19.7526	-0.823852	0.412919	0.92234	0.762301	-5.56486
D3ZE72	Metap1	0.26409	-0.379734	0.907913	16.4082	0.820603	0.41514	0.926262	0.763579	-5.56685
A0A0A0MY09	Hsp90b1	0.0698091	-0.101069	0.240688	19.3138	0.815288	0.417769	0.928707	0.766285	-5.57137
O35331	Pdxk	0.135823	-0.196807	0.468452	18.0444	0.814887	0.417997	0.928707	0.766399	-5.57167
F1LMS1	Cacna1e	0.127099	-0.184256	0.438454	16.9862	0.814653	0.41813	0.928707	0.766399	-5.57185
A0A096MJG7	LOC102554591	-0.077913	-0.268827	0.113001	19.0684	-0.814441	0.418251	0.928707	0.766399	-5.57201
Q9ER34	Aco2	-0.041055	-0.141859	0.0597493	22.3164	-0.812781	0.419195	0.928707	0.767248	-5.57326
A0A0G2K724	Mcts1	-0.353122	-1.22323	0.516989	16.1108	-0.813102	0.419625	0.928707	0.767801	-5.49953
P63088-2	Ppp1cc	0.183419	-0.267713	0.634551	18.7267	0.811606	0.419907	0.928707	0.768081	-5.5741
G3V6H9	Nap1l1	0.0871384	-0.127177	0.301454	18.4975	0.811415	0.419974	0.928707	0.768084	-5.57429
Q9Z272	Git1	-0.0605565	-0.209873	0.0887596	18.3134	-0.809358	0.421147	0.929521	0.769404	-5.57584
Q63083	Nucb1	0.114593	-0.168042	0.397229	16.938	0.809131	0.421277	0.929521	0.769468	-5.57601
A0A0G2K904		0.198395	-0.292926	0.689716	16.7512	0.806768	0.422805	0.931225	0.77078	-5.57753
A0A0G2K5N6	Rock2	-0.0562455	-0.195682	0.083191	18.2873	-0.805004	0.423638	0.931225	0.77171	-5.5791
O35509	Rab11b	-0.229506	-0.800116	0.341104	19.4632	-0.802679	0.424972	0.931225	0.77237	-5.58083
P37805	Tagln3	0.121981	-0.181449	0.425411	19.7011	0.80227	0.425207	0.931225	0.772658	-5.58113
A0A0H2UHB7	Slc4a4	-0.0637973	-0.222535	0.0949403	19.7776	-0.802064	0.425325	0.931225	0.772658	-5.58129
B0BNK1	Rab5c	-0.0629939	-0.219756	0.0937686	19.4592	-0.801941	0.425395	0.931225	0.772669	-5.58138
D4A197	Mcee	-0.174381	-0.609277	0.260515	18.3852	-0.800205	0.426394	0.931225	0.773658	-5.58267
M0RC99	Rab5a	-0.226925	-0.794107	0.340257	18.1901	-0.800128	0.42676	0.931225	0.773969	-5.55443
G3V7C6	Tubb4b	0.0629288	-0.0944374	0.220295	25.5186	0.79804	0.42764	0.931225	0.774291	-5.58427
A0A0H2UHC0	Arhgap44	-0.0768697	-0.269285	0.115545	17.1739	-0.797265	0.428087	0.931225	0.774595	-5.58485
Q5EB77	Rab18	0.132105	-0.19868	0.462889	17.9498	0.797001	0.428239	0.931225	0.774595	-5.58504
B0BND0	Enpp6	-0.377205	-1.32219	0.567777	16.5901	-0.796818	0.428386	0.931225	0.774595	-5.58514
F1LP01	Dgkb	0.0909315	-0.136998	0.318861	18.2803	0.79616	0.428724	0.931225	0.774595	-5.58567
P83732	Rpl24	0.209628	-0.316325	0.735582	17.8412	0.795407	0.429159	0.931225	0.774595	-5.58622
Q63569	Psmc3	-0.0855765	-0.300453	0.1293	18.6764	-0.79479	0.429516	0.931225	0.774595	-5.58668
Q91ZY8	Trim9	-0.138338	-0.486476	0.2098	17.438	-0.793006	0.430547	0.931225	0.775355	-5.58799
A2VD09	Abi1	-0.0881704	-0.310171	0.13383	18.8538	-0.792604	0.43078	0.931225	0.775355	-5.58829
O54701	Slc24a2	0.20914	-0.317599	0.735878	18.4445	0.792587	0.430831	0.931225	0.775355	-5.58821
A0A0G2JU66	Nploc4	-0.173014	-0.6088	0.262771	16.1066	-0.792311	0.430949	0.931225	0.775436	-5.5885
Q62636	Rap1b	-0.110341	-0.389442	0.16876	21.0301	-0.788972	0.432885	0.932945	0.77681	-5.59095
G3V6S2	Aco1	-0.0542717	-0.192079	0.0835359	18.0845	-0.785936	0.43465	0.932945	0.778805	-5.59317
P12711	Adh5	0.114884	-0.177139	0.406908	18.906	0.785108	0.435132	0.932945	0.779004	-5.59377
D4ADU2	Slc7a11	-0.151938	-0.539433	0.235557	17.2348	-0.782717	0.436566	0.932945	0.779837	-5.59547
G3V6Q3	Wdr13	-0.0773398	-0.274694	0.120014	18.1118	-0.782068	0.436904	0.932945	0.780186	-5.59599
A0A0G2K2V5		-0.166454	-0.591331	0.258423	17.5133	-0.782053	0.436953	0.932945	0.780186	-5.59591
Q05683	Gad2	0.0892781	-0.138934	0.31749	19.9356	0.780716	0.437693	0.932945	0.780739	-5.59697
Q6AXQ0	Sae1	0.270479	-0.421545	0.962502	17.9515	0.780667	0.437848	0.932945	0.780898	-5.59687
B2GUZ9	Fam49b	-0.0590363	-0.210126	0.092053	19.7997	-0.779779	0.438241	0.932945	0.781069	-5.59764
A0A0G2K0X4	Rac1	0.131435	-0.205114	0.467983	20.6054	0.779381	0.438474	0.932945	0.781198	-5.59793
B0BNA5	Cotl1	0.142051	-0.222389	0.506491	18.2725	0.777867	0.43936	0.932945	0.781843	-5.59903
P15999	Atp5a1	0.0551239	-0.0865094	0.196757	22.9406	0.776714	0.440035	0.932945	0.782326	-5.59986
B2RYG6	Otub1	-0.0627738	-0.224382	0.0988346	20.2609	-0.775177	0.440936	0.932945	0.782719	-5.60097
D3Z9L0	Agk	-0.232376	-0.831135	0.366382	16.2791	-0.774722	0.441244	0.932945	0.783006	-5.60125
Q63610-2	Tpm3	-0.058497	-0.209222	0.0922276	21.4139	-0.774526	0.441319	0.932945	0.783006	-5.60143
P09216	Prkce	-0.0775274	-0.277676	0.122621	18.3268	-0.773019	0.442204	0.932945	0.783006	-5.60252
Q66HM7	Ssb	-0.259583	-0.929752	0.410586	17.4691	-0.772998	0.442217	0.932945	0.783006	-5.60253
Q6AYR2	Ndrg3	-0.10856	-0.38902	0.171899	18.2424	-0.77248	0.442521	0.932945	0.783006	-5.6029
F1M9V7	Npepps	-0.0407893	-0.146212	0.0646338	19.3863	-0.772143	0.442719	0.932945	0.783006	-5.60315
P42123	Ldhb	-0.0380744	-0.136731	0.0605824	22.3418	-0.770181	0.443874	0.932945	0.783447	-5.60455
A0A0G2K5D7	Specc1	-0.127746	-0.458891	0.2034	16.4803	-0.769865	0.44406	0.932945	0.783582	-5.60478
Q3T1J1	Eif5a	-0.157586	-0.566361	0.25119	18.2761	-0.769341	0.444369	0.932945	0.78374	-5.60515
F8WFH6	Fam131b	0.156178	-0.24956	0.561915	16.3679	0.768601	0.444887	0.932945	0.783919	-5.6056
G3V8U9	Psmb4	0.143252	-0.229128	0.515633	18.6377	0.767717	0.445327	0.932945	0.784151	-5.60631
A0A0G2K7W7	Gsk3a	-0.0952686	-0.343133	0.152596	19.6777	-0.767047	0.445723	0.932945	0.784388	-5.60679
Q5XIM9	Cct2	-0.074406	-0.268243	0.119431	19.7785	-0.76605	0.446312	0.932945	0.784641	-5.6075
D3ZW08	Adsl	-0.0943797	-0.340336	0.151577	18.2614	-0.765786	0.446468	0.932945	0.784641	-5.60769
P97608	Oplah	-0.243401	-0.878997	0.392195	19.2742	-0.766106	0.446635	0.932945	0.784641	-5.55299
P62912	Rpl32	0.0834151	-0.134217	0.301047	18.7953	0.764906	0.446988	0.932945	0.784764	-5.60831
B2RZ74	Snrnp70	0.181987	-0.293208	0.657182	16.7367	0.764493	0.447272	0.932945	0.784764	-5.60856
A0A0G2JT30	Mat2b	-0.156833	-0.567637	0.253971	19.1328	-0.761884	0.448778	0.932945	0.785707	-5.61045
Q3B8Q2	Eif4a3	0.238101	-0.38669	0.862892	17.0341	0.760524	0.449584	0.932945	0.786214	-5.61141
A0A0H2UHF5	Kcnj10	0.177302	-0.289486	0.644089	16.6171	0.759122	0.450626	0.932945	0.787018	-5.59094
Q66HR2	Mapre1	-0.272921	-0.990772	0.44493	17.9812	-0.758733	0.450648	0.932945	0.787018	-5.61268
P97612	Faah	-0.186856	-0.678958	0.305246	17.4336	-0.757774	0.451219	0.932945	0.787096	-5.61335
P82995	Hsp90aa1	0.0685668	-0.112051	0.249184	21.3458	0.757602	0.451321	0.932945	0.787096	-5.61347
P62944	Ap2b1	-0.118416	-0.430632	0.193799	19.9994	-0.756909	0.451733	0.932945	0.787096	-5.61396
G3V728	Nipsnap1	0.0652914	-0.107134	0.237717	20.281	0.755685	0.452462	0.932945	0.787533	-5.61482
A0A0G2JUZ5		0.23518	-0.387132	0.857491	16.8348	0.755775	0.45271	0.932945	0.787718	-5.58487
Q920L2	Sdha	-0.0916504	-0.333972	0.150671	20.4923	-0.754794	0.452993	0.932945	0.787718	-5.61545
F1M820	Sorbs1	-0.159051	-0.579837	0.261735	16.3249	-0.754749	0.453099	0.932945	0.787718	-5.6151
F1LN92	Afg3l2	0.119923	-0.197263	0.437109	17.3855	0.754526	0.453153	0.932945	0.787718	-5.61563
P11240	Cox5a	-0.0485449	-0.176968	0.0798785	22.324	-0.754373	0.453244	0.932945	0.787718	-5.61574
Q9ESH6	Glrx	0.0823874	-0.135568	0.300343	19.57	0.754363	0.45325	0.932945	0.787718	-5.61575
A0A0G2K9A2	Arpc2	-0.130714	-0.476574	0.215146	19.9076	-0.754239	0.453324	0.932945	0.787718	-5.61584
D4A6C5	Arhgap1	-0.0560132	-0.204329	0.0923028	19.1947	-0.753683	0.453655	0.932945	0.787718	-5.61622
Q5M963	Cmas	0.13729	-0.226716	0.501297	17.2966	0.752898	0.454163	0.932945	0.787964	-5.61673
Q32PX6	Rhog	0.170214	-0.282623	0.623051	17.8207	0.750341	0.45569	0.932945	0.789486	-5.61846
A0A0G2K6T9		-0.0643731	-0.235795	0.107048	18.1119	-0.749421	0.456202	0.932945	0.789575	-5.6192
D3ZYX8	Cox7a2l	0.231744	-0.385842	0.84933	18.2963	0.748855	0.456541	0.932945	0.789575	-5.61959
P38983	Rpsa	0.124299	-0.206956	0.455553	19.8391	0.748844	0.456548	0.932945	0.789575	-5.6196
P69897	Tubb5	0.128079	-0.214222	0.470381	23.7542	0.746719	0.457821	0.932945	0.79086	-5.62108
F1M013	LOC100910109	0.0810507	-0.135735	0.297836	18.9568	0.746127	0.458176	0.932945	0.791069	-5.62149
P68101	Eif2s1	0.10778	-0.180642	0.396202	17.9266	0.745754	0.4584	0.932945	0.791173	-5.62175
F1LT49	Lrrc47	-0.107254	-0.395074	0.180566	17.2666	-0.743667	0.459653	0.932945	0.792145	-5.62319
F1LSG8	Ccdc132	-0.24588	-0.906306	0.414547	15.8469	-0.743845	0.459708	0.932945	0.792145	-5.62284
P62142	Ppp1cb	0.179301	-0.302046	0.660647	18.8927	0.743379	0.459826	0.932945	0.792145	-5.62339
Q4KM38	Srsf10	0.11349	-0.191304	0.418284	17.4327	0.743288	0.45992	0.932945	0.792169	-5.62341
Q62785	Pdap1	-0.156578	-0.577657	0.264501	17.597	-0.742498	0.460434	0.932945	0.792702	-5.5985
A0A1W2Q627	Eif4e	0.168248	-0.284374	0.620871	16.7182	0.741825	0.460762	0.932945	0.792784	-5.62446
Q68FQ0	Cct5	-0.0843075	-0.311234	0.142619	20.033	-0.741426	0.461002	0.932945	0.792784	-5.62474
P81155	Vdac2	0.107747	-0.182379	0.397872	20.2911	0.741146	0.46117	0.932945	0.792784	-5.62493
Q6PDW1	LOC100359593	0.0653436	-0.11066	0.241347	18.6076	0.740914	0.46131	0.932945	0.792784	-5.62509
Q5BJR4	Prune2	-0.306929	-1.13693	0.52307	16.7527	-0.740052	0.462221	0.933837	0.793343	-5.59713
F1LPG3	Pacs1	-0.0536159	-0.198525	0.0912928	18.2839	-0.73839	0.462832	0.93406	0.793559	-5.62682
G3V7G9	Eif3l	0.174706	-0.297941	0.647354	16.9075	0.737662	0.463271	0.93406	0.793559	-5.62732
D3ZP47	Phpt1	-0.152829	-0.566744	0.261086	17.2675	-0.736852	0.46376	0.934099	0.793877	-5.62788
Q3B8N9	Bphl	-0.112991	-0.419574	0.193592	17.3842	-0.735502	0.464577	0.93417	0.794182	-5.6288
P09495	Tpm4	-0.165585	-0.615118	0.283948	17.9128	-0.735302	0.464736	0.93417	0.794182	-5.59771
P67779	Phb	-0.0617155	-0.229698	0.106267	20.0178	-0.73319	0.465976	0.934552	0.794182	-5.63038
Q91Z79	Ppfia3	-0.0498245	-0.185538	0.0858887	18.9396	-0.732668	0.466292	0.934552	0.794182	-5.63074
P63018	Hspa8	0.0531914	-0.0917068	0.19809	23.0218	0.732597	0.466336	0.934552	0.794182	-5.63078
D3ZKQ4	Rabl6	-0.19676	-0.735964	0.342445	16.7899	-0.729065	0.468637	0.935323	0.796509	-5.63276
F1M9Y7	Tcp11l1	0.233481	-0.406502	0.873463	16.6785	0.728468	0.468918	0.935323	0.796858	-5.63321
A0A0G2JU89	Ubr4	0.210634	-0.366915	0.788183	16.4886	0.728439	0.468976	0.935323	0.796858	-5.63349
Q9QZA2	Pdcd6ip	-0.0726513	-0.271969	0.126667	18.0629	-0.727417	0.469481	0.935323	0.796923	-5.6343
Q9R085	Usp15	-0.22674	-0.849769	0.396288	16.6631	-0.726689	0.47	0.935323	0.796923	-5.63471
P14659	Hspa2	-0.124581	-0.466781	0.217619	17.9029	-0.726538	0.470016	0.935323	0.796923	-5.63489
P0C5X8	Ttyh1	-0.188316	-0.70606	0.329429	19.379	-0.725869	0.470423	0.935323	0.797273	-5.63534
B2RYN0	Pgm3	0.0515757	-0.0903611	0.193512	18.2921	0.725165	0.470852	0.935323	0.797434	-5.63582
P63102	Ywhaz	0.0742983	-0.130326	0.278923	23.1658	0.724616	0.471187	0.935323	0.797887	-5.63619
F1M978	Impa1	-0.089003	-0.334467	0.156461	19.9687	-0.723609	0.471801	0.935323	0.798391	-5.63687
P97532	Mpst	-0.119292	-0.449025	0.21044	17.9079	-0.722001	0.472783	0.935323	0.798391	-5.63795
P63142	Kcna2	-0.275956	-1.03891	0.486993	17.9328	-0.722021	0.472808	0.935323	0.798391	-5.6379
G3V7I8	Slk	0.0856934	-0.151198	0.322585	17.5178	0.721912	0.472837	0.935323	0.798391	-5.63801
Q6MG06	Gnl1	-0.249301	-0.941259	0.442656	16.4373	-0.72052	0.473974	0.935702	0.799059	-5.63827
Q5M7A4	Uba5	0.0783189	-0.138759	0.295397	17.7903	0.720008	0.474001	0.935702	0.799059	-5.63928
F1M7W7	Nae1	-0.137799	-0.520343	0.244746	16.0836	-0.719477	0.47444	0.935702	0.799537	-5.63952
Q6PDW2	LOC100360604	0.0903416	-0.160845	0.341528	18.8485	0.717758	0.475378	0.935991	0.800313	-5.64079
P15205	Map1b	-0.0311345	-0.117887	0.0556176	21.1603	-0.716223	0.476319	0.935991	0.801232	-5.64181
P32551	Uqcrc2	-0.0459072	-0.173915	0.0821006	22.1461	-0.7157	0.47664	0.935991	0.801546	-5.64216
Q3B8Q0	Mapre2	-0.0870977	-0.330497	0.156302	18.828	-0.714125	0.477607	0.935991	0.801821	-5.6432
D3Z941	Mars	0.0795855	-0.142945	0.302116	17.2021	0.713727	0.477852	0.935991	0.801821	-5.64347
A0A096MKH2	Vta1	-0.118543	-0.450512	0.213427	18.9153	-0.713024	0.478358	0.935991	0.802018	-5.64386
F1LUA1	Eea1	-0.0857719	-0.326052	0.154508	17.3376	-0.712383	0.478678	0.935991	0.802081	-5.64436
O35142	Copb2	0.248171	-0.448419	0.944762	16.9097	0.711587	0.479281	0.935991	0.802479	-5.64477
P23711	Hmox2	-0.12651	-0.481661	0.228642	16.993	-0.710881	0.479602	0.935991	0.802792	-5.64535
F1LMC7	Sept7	-0.0439277	-0.167371	0.0795157	21.0602	-0.710161	0.480045	0.935991	0.803083	-5.64583
F1M4I4	Vps51	0.124586	-0.226558	0.47573	16.9241	0.709795	0.480597	0.935991	0.803385	-5.61574
A0A0G2K9V6	Tars	-0.145126	-0.553499	0.263246	16.7637	-0.709213	0.48063	0.935991	0.803385	-5.64645
P26772	Hspe1	0.174812	-0.3182	0.667825	21.3373	0.707621	0.481612	0.935991	0.803532	-5.6475
Q5U2S7	Psmd3	-0.0969842	-0.370591	0.176622	19.3653	-0.707394	0.481752	0.935991	0.803532	-5.64765
P21533	Rpl6	0.077211	-0.140746	0.295168	19.4573	0.706961	0.482019	0.935991	0.803532	-5.64794
B2DD29	Brsk1	-0.0907161	-0.346855	0.165423	17.4494	-0.706797	0.48212	0.935991	0.803532	-5.64805
A0A0G2K761	Cul2	-0.265229	-1.01788	0.487423	16.4566	-0.703646	0.484142	0.938075	0.805179	-5.65004
D4A0A1	Soga3	-0.105989	-0.406892	0.194914	16.9466	-0.702945	0.484503	0.938075	0.805344	-5.65057
Q32Q06	Ap1m1	-0.201231	-0.774633	0.372171	17.7086	-0.700954	0.485847	0.938075	0.806343	-5.65176
D3ZC15	Rltpr	-0.0836446	-0.322335	0.155046	17.451	-0.699341	0.486737	0.938075	0.806804	-5.65292
G3V762	Tsta3	-0.29415	-1.13416	0.545864	16.3115	-0.699417	0.486801	0.938075	0.806804	-5.65271
Q05982	Nme1	-0.197699	-0.762288	0.36689	20.0069	-0.698809	0.487067	0.938075	0.806804	-5.65327
D4ABB2	Mlc1	0.198124	-0.367793	0.764041	17.4457	0.698859	0.487072	0.938075	0.806804	-5.65315
Q3T1K5	Capza2	0.0816817	-0.1518	0.315163	21.4294	0.698166	0.487467	0.938075	0.807233	-5.65368
G3V8Q1	Cope	-0.115522	-0.446242	0.215197	17.08	-0.697286	0.488049	0.938075	0.807328	-5.65418
D3ZT47	Fam171a2	-0.128532	-0.496734	0.239669	16.7287	-0.697034	0.488243	0.938075	0.807328	-5.60786
Q6AYS7	Acy1a	-0.084586	-0.32695	0.157778	17.5564	-0.696493	0.488506	0.938075	0.807498	-5.65477
B2RZ37	Reep5	-0.117463	-0.4543	0.219374	18.2714	-0.695932	0.488856	0.938075	0.807628	-5.65513
A0A0G2QC21	Arhgef7	0.21818	-0.410216	0.846575	16.6422	0.693085	0.490665	0.939547	0.809383	-5.65694
D3ZE85	Frrs1l	0.147568	-0.277601	0.572738	17.5081	0.692655	0.490897	0.939547	0.809543	-5.65725
Q63362	Ndufa5	-0.132096	-0.512815	0.248622	19.5276	-0.692425	0.491041	0.939547	0.809616	-5.6574
B0BMX3	S100a16	-0.0980181	-0.381089	0.185053	17.9165	-0.69103	0.491911	0.940307	0.809897	-5.65829
Q2TA68	Opa1	-0.0473784	-0.184507	0.0897497	19.4758	-0.68951	0.492861	0.94121	0.810316	-5.65927
D4A3E1	Hnrnpll	0.113512	-0.215775	0.4428	18.231	0.687946	0.493839	0.94121	0.810891	-5.66027
P31596	Slc1a2	-0.0557855	-0.217724	0.106153	23.5544	-0.687478	0.494132	0.94121	0.810909	-5.66057
Q9Z1T4	Cnksr2	0.0631123	-0.120157	0.246381	17.8377	0.687246	0.494277	0.94121	0.810909	-5.66072
Q4V8C7	Prkra	-0.137156	-0.536797	0.262485	17.0325	-0.686349	0.495109	0.941366	0.8116	-5.59342
F1M7K7	Cacng8	-0.0794744	-0.310809	0.15186	19.0953	-0.685604	0.495306	0.941366	0.811763	-5.66177
A0A0G2KB98	Gsk3b	-0.0732373	-0.286941	0.140466	17.7712	-0.683922	0.496361	0.9416	0.812579	-5.66284
D3ZSY8	Tbc1d10b	-0.0752029	-0.29465	0.144245	18.2589	-0.683897	0.496377	0.9416	0.812579	-5.66286
O08557	Ddah1	-0.0794035	-0.312173	0.153366	19.8238	-0.680771	0.49834	0.943583	0.81399	-5.66484
Q1RP74	LOC100911774	-0.250438	-0.98508	0.484203	16.8034	-0.680893	0.498371	0.943583	0.81399	-5.66465
P62024	Phactr1	-0.0768429	-0.302439	0.148753	17.6313	-0.679766	0.498972	0.943822	0.814526	-5.66548
Q4FZY0	Efhd2	0.136079	-0.264101	0.536259	18.4013	0.678614	0.499698	0.944296	0.81521	-5.6662
A0A0G2K677		-0.0740458	-0.292311	0.144219	16.9352	-0.677023	0.5007	0.945292	0.815895	-5.66721
P62919	Rpl8	0.114716	-0.22577	0.455201	21.7655	0.672374	0.503636	0.949932	0.819113	-5.67013
P0C5H9	Manf	0.147576	-0.291908	0.587059	16.7943	0.670131	0.505056	0.951707	0.820303	-5.67153
F1LV89	Rap1gap	-0.190687	-0.76024	0.378866	17.0277	-0.668149	0.506312	0.952203	0.821337	-5.67276
A0A0G2JWS2	Nebl	0.148474	-0.295296	0.592244	18.0767	0.667695	0.5066	0.952203	0.821469	-5.67304
B5DEL8	LOC100361505	-0.0475307	-0.189759	0.0946973	19.3784	-0.666923	0.50709	0.952203	0.821928	-5.67352
D3ZFQ8	Cyc1	-0.0883981	-0.353812	0.177016	20.8489	-0.66467	0.508521	0.952203	0.822741	-5.67492
P51635	Akr1a1	-0.0462742	-0.185656	0.0931074	20.4152	-0.662553	0.509868	0.952203	0.822998	-5.67623
G3V6D3	Atp5b	-0.0416927	-0.167333	0.0839479	24.0376	-0.662243	0.510066	0.952203	0.822998	-5.67642
Q76EQ0	Srr	-0.0555326	-0.222912	0.111847	18.8529	-0.662112	0.510149	0.952203	0.822998	-5.6765
A0A0G2KAW2	Sipa1l1	-0.124045	-0.498395	0.250306	17.8473	-0.661282	0.510678	0.952203	0.823165	-5.67701
P04906	Gstp1	-0.0895032	-0.359643	0.180637	20.6556	-0.661206	0.510726	0.952203	0.823165	-5.67706
Q6P6Q5	App	0.0631407	-0.127443	0.253724	17.7419	0.661166	0.510751	0.952203	0.823165	-5.67708
Q3KRE0	Atad3	0.13439	-0.271399	0.540179	16.8596	0.660927	0.510904	0.952203	0.8233	-5.67723
Q9JJ19	Slc9a3r1	0.0379163	-0.0766157	0.152448	19.534	0.660672	0.511066	0.952203	0.823339	-5.67739
D4A7N1	Chchd6	-0.0735113	-0.297742	0.15072	18.5199	-0.654252	0.515168	0.957801	0.826728	-5.68132
A0A0G2K9C5	Numbl	0.229935	-0.471529	0.931398	16.5637	0.654163	0.515225	0.957801	0.826728	-5.68137
Q641Z9	Sdhc	-0.157141	-0.637028	0.322746	17.6084	-0.653488	0.515657	0.957801	0.826937	-5.68178
Q63228	Gmfb	-0.164316	-0.666524	0.337892	18.0613	-0.652955	0.515998	0.957801	0.827151	-5.6821
G3V982	Elmo2	0.117926	-0.243409	0.479261	18.225	0.65131	0.517053	0.958391	0.828376	-5.6831
P19643	Maob	0.0594368	-0.122781	0.241655	18.7464	0.650955	0.517281	0.958391	0.828376	-5.68332
P09117	Aldoc	0.0419252	-0.0872797	0.17113	22.1694	0.647564	0.519459	0.961293	0.82907	-5.68537
D4ABN3	Synj1	0.0363823	-0.075864	0.148629	20.6762	0.646852	0.519917	0.961293	0.82907	-5.6858
P62083	Rps7	0.0781839	-0.163738	0.320106	19.4933	0.644953	0.521139	0.961293	0.830148	-5.68694
A0A0G2K5L2	LOC100911440	0.0655666	-0.137671	0.268804	20.1582	0.643823	0.521868	0.961293	0.830469	-5.68762
F1LPA6	Padi2	0.182925	-0.385133	0.750983	16.6918	0.643779	0.522107	0.961293	0.830469	-5.68711
Q6AYR6	Hdhd2	0.179029	-0.376931	0.734988	17.5012	0.64318	0.522382	0.961293	0.830519	-5.6879
P62138	Ppp1ca	-0.0539849	-0.221663	0.113693	20.1508	-0.642515	0.522711	0.961293	0.830655	-5.6884
D3ZG43	Ndufs3	-0.1218	-0.500446	0.256846	19.4545	-0.641951	0.523074	0.961293	0.831011	-5.68874
D4A2G9	Ranbp1	-0.0839732	-0.34554	0.177594	18.4707	-0.640686	0.523892	0.961293	0.831582	-5.68949
A0A096MJ42	Dlg3	-0.102902	-0.423524	0.21772	17.8614	-0.640496	0.524014	0.961293	0.831582	-5.68961
Q6AXR6	Gsto1	0.0854845	-0.181168	0.352137	19.1782	0.639776	0.524479	0.961293	0.831582	-5.69004
M0RBF0	Safb	0.217566	-0.464324	0.899456	16.4194	0.637669	0.526013	0.961293	0.832364	-5.6626
A0A0G2JX74	Mtor	-0.126974	-0.524524	0.270577	17.3322	-0.637394	0.52602	0.961293	0.832364	-5.69145
D3ZHX3	Diras2	-0.133537	-0.552346	0.285272	17.6723	-0.636316	0.526718	0.961293	0.832883	-5.69209
Q6AXV4	Samm50	-0.146039	-0.604165	0.312088	18.3979	-0.636164	0.526816	0.961293	0.832883	-5.69218
Q00566-2	Mecp2	-0.098249	-0.40656	0.210062	16.977	-0.635954	0.526952	0.961293	0.832883	-5.69231
F1MA89	Ccny	0.37958	-0.812423	1.57158	17.389	0.635849	0.527086	0.961293	0.832883	-5.6923
D3ZCL3	Snrpc	-0.157098	-0.651439	0.337243	16.8902	-0.63438	0.528005	0.961293	0.833735	-5.69316
B5DEH2	Erlin2	0.14177	-0.304672	0.588213	16.2135	0.634269	0.528144	0.961293	0.833735	-5.6932
Q03344	Atpif1	-0.0678327	-0.281659	0.145994	20.5017	-0.633088	0.528811	0.961293	0.834266	-5.694
B2RYQ5	Erh	0.218033	-0.471001	0.907067	18.0964	0.631666	0.529766	0.961293	0.83508	-5.67055
P18088	Gad1	0.186905	-0.404782	0.778591	17.0917	0.631518	0.530037	0.961293	0.835286	-5.64841
Q78P75	Dynll2	0.142222	-0.309888	0.594332	20.4257	0.627783	0.53226	0.961293	0.836491	-5.69712
Q5XIM7	Kars	-0.176884	-0.739789	0.38602	16.7561	-0.628019	0.532274	0.961293	0.836491	-5.67239
Q68FP1	Gsn	0.328939	-0.718485	1.37636	16.6299	0.627841	0.532427	0.961293	0.836612	-5.64444
D3ZXH7	Alyref	-0.0946727	-0.39597	0.206625	17.8732	-0.627418	0.532562	0.961293	0.836612	-5.69726
A0A0G2JYF0	Slc4a10	-0.104253	-0.436431	0.227925	18.1121	-0.626331	0.533206	0.961293	0.836697	-5.69796
B4F7C2	Tubb4a	-0.0739047	-0.309502	0.161693	22.6277	-0.62602	0.533409	0.961293	0.836697	-5.69814
O35244	Prdx6	-0.0708196	-0.29659	0.154951	20.9796	-0.625997	0.533424	0.961293	0.836697	-5.69816
G3V6I9	Rpl26	0.10258	-0.22447	0.429631	18.8317	0.625945	0.533457	0.961293	0.836697	-5.69819
Q08877-9	Dnm3	-0.0953819	-0.399765	0.209001	17.6638	-0.625364	0.533837	0.961293	0.837182	-5.69853
Q63372-13	Nrxn1	-0.117564	-0.493921	0.258792	17.1777	-0.623741	0.534959	0.961939	0.838281	-5.6991
D4A1G8	Cep170b	-0.0760724	-0.319626	0.167482	17.9576	-0.623331	0.535163	0.961939	0.838315	-5.69971
P11517		-0.138774	-0.583984	0.306435	21.0871	-0.62223	0.535914	0.96239	0.838708	-5.6891
Q62829	Pak3	0.0584915	-0.129639	0.246622	20.0568	0.620469	0.537034	0.96239	0.839633	-5.70137
P54287	Cacnb3	0.0871802	-0.193425	0.367786	16.2696	0.620024	0.537325	0.96239	0.839843	-5.70162
A0A0G2JZX9		-0.215001	-0.907432	0.477431	17.2533	-0.619824	0.537487	0.96239	0.839925	-5.70171
F8WFS9	Add2	-0.0522139	-0.220619	0.116192	20.1169	-0.618751	0.538158	0.96239	0.840303	-5.70236
Q9WV97	Timm9	-0.0616555	-0.26072	0.137409	19.1179	-0.618108	0.53858	0.96239	0.840303	-5.70273
Q8CF97	Vcpip1	0.0609491	-0.136108	0.258006	17.5283	0.61725	0.539142	0.96239	0.840303	-5.70322
G3V6L9	Fkbp3	-0.155117	-0.657878	0.347644	17.1998	-0.61572	0.540146	0.96239	0.840696	-5.7041
P31662	Slc6a17	-0.11248	-0.477208	0.252248	18.0456	-0.615449	0.540324	0.96239	0.840696	-5.70426
A0A0U1RRV7	Srsf3	-0.158488	-0.672874	0.355898	18.4014	-0.615054	0.540614	0.96239	0.840735	-5.70445
Q5BK63	Ndufa9	-0.0612284	-0.259973	0.137516	19.6845	-0.614816	0.540739	0.96239	0.840821	-5.70462
P41243	Matk	0.0613899	-0.138647	0.261427	17.3733	0.612794	0.54213	0.964002	0.842247	-5.70558
D4A9P7	LOC100363408	0.136716	-0.309943	0.583374	17.457	0.610844	0.54335	0.965109	0.842914	-5.70689
Q568Z6	Ist1	0.0642111	-0.146	0.274422	17.0313	0.609596	0.544172	0.965109	0.843187	-5.7076
P70645	Blmh	-0.0575957	-0.246298	0.131107	18.1735	-0.609115	0.544488	0.965109	0.843243	-5.70787
D3ZQ02	Wdr37	-0.0789722	-0.337877	0.179933	17.8491	-0.608723	0.544747	0.965109	0.843298	-5.70809
O35458	Slc32a1	-0.0895672	-0.383703	0.204569	18.2683	-0.607697	0.545424	0.965109	0.843487	-5.70867
A0A0G2JTW9		0.259792	-0.596714	1.1163	19.3755	0.605316	0.546994	0.965109	0.844383	-5.71002
D4A054	Ranbp2	-0.158517	-0.682834	0.3658	16.0692	-0.604227	0.547875	0.965109	0.845079	-5.71043
Q5I0D1	Glod4	-0.125049	-0.538466	0.288367	18.2349	-0.603643	0.5481	0.965109	0.845079	-5.71096
P20070-3	Cyb5r3	0.0685915	-0.158315	0.295498	19.0286	0.603269	0.548348	0.965109	0.845079	-5.71117
Q5XIC0	Eci2	-0.218645	-0.942441	0.505151	16.8783	-0.603361	0.54838	0.965109	0.845079	-5.71103
Q5PQK2	Fus	-0.145691	-0.628795	0.337412	18.0806	-0.601838	0.549294	0.965109	0.845144	-5.71198
D4AD15	Eif4g1	0.0790635	-0.183316	0.341443	17.8191	0.601358	0.549612	0.965109	0.845144	-5.71225
P11506-14	Atp2b2	-0.0433696	-0.187414	0.100675	21.1184	-0.600861	0.549941	0.965109	0.845357	-5.71252
F1LSW7	Rpl14	0.151334	-0.352184	0.654852	18.1383	0.599967	0.550563	0.965109	0.845515	-5.70354
F1LYA6	Abi2	-0.120301	-0.520615	0.280013	18.7031	-0.599729	0.550691	0.965109	0.84552	-5.71316
A0A0G2K8T0	Asah1	-0.235494	-1.02063	0.549645	16.6738	-0.599837	0.55085	0.965109	0.84552	-5.65668
Q6P4Z9	Cops8	-0.13633	-0.590599	0.317938	18.5422	-0.598917	0.551229	0.965109	0.845655	-5.71361
Q9QZR6	Sept9	-0.0652492	-0.282891	0.152392	19.9512	-0.598301	0.551637	0.965109	0.845701	-5.71395
F1LPV8	Suclg2	-0.122394	-0.531566	0.286777	16.8974	-0.597826	0.552112	0.965109	0.845701	-5.6927
F1M1A6	LOC681355	-0.16085	-0.698489	0.376789	17.805	-0.597058	0.552462	0.965109	0.845701	-5.71465
P68035	Actc1	0.127462	-0.299725	0.55465	24.2314	0.595456	0.553526	0.965642	0.845926	-5.71554
P63047	Sult4a1	-0.0680716	-0.29638	0.160237	17.1785	-0.595181	0.553738	0.965642	0.845926	-5.71566
Q5RJR9	Serpinh1	-0.116579	-0.508325	0.275167	16.9986	-0.593884	0.554571	0.966166	0.8465	-5.71641
D4A719	Snx12	0.0714707	-0.169148	0.31209	17.3189	0.592768	0.555313	0.966166	0.846798	-5.71703
D4A304	Diras1	0.186074	-0.442333	0.814481	16.4231	0.591783	0.556126	0.966166	0.847186	-5.68959
Q6P9V6	Psma5	-0.090688	-0.397387	0.216011	19.1838	-0.590099	0.557091	0.966166	0.84779	-5.7185
F1LSH6	Hcn1	0.130399	-0.311725	0.572523	16.522	0.588923	0.557934	0.966166	0.848336	-5.71908
P62775	Mtpn	-0.148779	-0.653149	0.355591	19.3676	-0.588679	0.558037	0.966166	0.848336	-5.71928
P55053	Fabp5	0.10914	-0.260863	0.479144	19.9462	0.588662	0.558048	0.966166	0.848336	-5.71929
P50411	Ppp1r2	-0.0606089	-0.266241	0.145023	16.8843	-0.588209	0.558351	0.966166	0.848336	-5.71953
A0A0G2K613	Marcksl1	-0.155661	-0.684078	0.372757	19.3176	-0.588205	0.558413	0.966166	0.848336	-5.71948
F1LT35	RGD1564606	0.145865	-0.34982	0.64155	19.1046	0.587263	0.558982	0.96631	0.848635	-5.72005
D4ABT8	Hnrnpul2	0.0701047	-0.168902	0.309111	17.7968	0.585361	0.560253	0.967159	0.849243	-5.72109
F1LMV8	Prkce	-0.14523	-0.640605	0.350145	17.8637	-0.585072	0.560446	0.967159	0.849299	-5.72125
Q8R424	Stambp	0.132173	-0.320312	0.584659	15.8096	0.583102	0.561793	0.968642	0.84985	-5.72229
A0A0G2JY08	Myo18a	0.0467889	-0.113802	0.20738	17.5703	0.581444	0.562874	0.968724	0.851161	-5.72322
Q8CGU4	Agap2	-0.0449146	-0.199236	0.109406	17.8473	-0.58083	0.563285	0.968724	0.851269	-5.72356
A0A0G2K890	Ezr	-0.0587327	-0.26054	0.143074	19.5288	-0.580805	0.563302	0.968724	0.851269	-5.72357
A0A0G2K1L8		-0.153883	-0.684596	0.376831	22.1764	-0.578651	0.564747	0.970369	0.852265	-5.72473
P11951	Cox6c2	-0.0672593	-0.299647	0.165128	22.21	-0.577599	0.565453	0.970467	0.853006	-5.7253
G3V7T8	Dlgap3	0.177989	-0.438666	0.794644	17.9149	0.576177	0.566436	0.970467	0.853211	-5.72603
A0A0G2JSI1	Aldh9a1	-0.0991934	-0.442872	0.244486	17.5974	-0.575992	0.566532	0.970467	0.853211	-5.72616
O70511	Ank3	-0.0437732	-0.195894	0.108348	18.3691	-0.574255	0.5677	0.970467	0.853711	-5.7271
F1LTW9	Efr3b	-0.163031	-0.72979	0.403728	17.0462	-0.574218	0.567754	0.970467	0.853711	-5.70568
Q5U1Z0	Rab3gap2	-0.143217	-0.64159	0.355157	17.3818	-0.573645	0.568139	0.970467	0.853711	-5.72739
P63045	Vamp2	0.0757057	-0.187933	0.339345	22.6697	0.573067	0.5685	0.970467	0.854038	-5.72773
P14480-2	Fgb	0.348019	-0.870021	1.56606	15.899	0.571597	0.569743	0.970467	0.855171	-5.67313
Q63610	Tpm3	0.0901559	-0.226736	0.407048	19.3574	0.567766	0.572074	0.970467	0.855741	-5.73055
Q99JD5	Bcat1	-0.0655352	-0.295929	0.164859	19.1842	-0.567662	0.572144	0.970467	0.855741	-5.73061
A0A0G2JZA2	Grpel1	-0.0550296	-0.248587	0.138528	17.7214	-0.567379	0.572335	0.970467	0.855741	-5.73076
A0A0G2JZB8		0.0926524	-0.233988	0.419292	19.2104	0.566075	0.573216	0.970467	0.85586	-5.73145
Q9JHZ4	Gripap1	-0.0688289	-0.31191	0.174253	17.8532	-0.565074	0.573893	0.970467	0.856423	-5.73197
P62890	Rpl30	0.0780517	-0.197826	0.35393	17.956	0.564614	0.574204	0.970467	0.856622	-5.73222
P09951	Syn1	-0.0438874	-0.199393	0.111619	22.9953	-0.563221	0.575146	0.970467	0.857259	-5.73295
P04797	Gapdh	0.0389257	-0.0990868	0.176938	24.4974	0.562866	0.575387	0.970467	0.857259	-5.73313
Q6P7B0	Wars	-0.0593022	-0.269955	0.15135	19.3331	-0.561811	0.576101	0.970467	0.857515	-5.73369
P15865	Hist1h1e	0.118072	-0.301519	0.537663	21.1984	0.561575	0.576262	0.970467	0.857515	-5.73381
A0A0H2UHH9	LOC100363469	0.0974645	-0.249453	0.444382	18.0021	0.560669	0.576876	0.970467	0.857515	-5.73429
Q8VIJ5	Mgea5	-0.0688278	-0.31387	0.176214	17.1439	-0.560544	0.57696	0.970467	0.857515	-5.73435
G3V6T1	Copa	-0.0667003	-0.304432	0.171032	18.0685	-0.559921	0.577383	0.970467	0.857555	-5.73468
A0A0G2JW88		-0.0454725	-0.207618	0.116673	21.2903	-0.559669	0.577554	0.970467	0.857621	-5.73481
Q64548-2	Rtn1	0.227724	-0.586637	1.04209	18.0603	0.559232	0.578063	0.970467	0.857863	-5.71338
D3ZDR2	Chmp6	-0.208237	-0.9531	0.536627	16.9902	-0.558386	0.57851	0.970467	0.857863	-5.73533
A0A0G2JUI3	Dlgap2	-0.112374	-0.514456	0.289708	16.8062	-0.557899	0.578783	0.970467	0.857863	-5.7357
F1LPA3	Iqsec3	0.0939346	-0.242295	0.430165	16.5036	0.55754	0.578999	0.970467	0.857863	-5.73592
O35303	Dnm1l	-0.0484059	-0.221809	0.124998	19.8509	-0.557092	0.579303	0.970467	0.857863	-5.73615
Q9JHW0	Psmb7	-0.0557896	-0.256139	0.14456	18.0638	-0.555715	0.580239	0.970467	0.85808	-5.73686
A0A0G2JW01		-0.0631737	-0.290156	0.163808	17.6143	-0.555433	0.580431	0.970467	0.85808	-5.73701
Q6AYK8	Eif3d	0.0857818	-0.222601	0.394165	17.6373	0.555126	0.58064	0.970467	0.85808	-5.73717
A0A0G2K4U8	Stx12	-0.072348	-0.332591	0.187895	18.5253	-0.554797	0.580863	0.970467	0.85808	-5.73734
D3ZFY8	LOC100912618	0.055807	-0.145416	0.25703	19.9693	0.553474	0.581764	0.970467	0.859035	-5.73802
P37361	Mt3	0.114105	-0.297637	0.525848	18.685	0.553054	0.582049	0.970467	0.859237	-5.73824
D3ZSS1	Taf15	-0.157037	-0.724509	0.410435	17.3455	-0.553065	0.582188	0.970467	0.859237	-5.7081
M0RAE4	Ubxn6	-0.0907281	-0.418362	0.236906	16.2108	-0.552788	0.582258	0.970467	0.859237	-5.73835
A0A0G2JW34		-0.146625	-0.677868	0.384617	15.7667	-0.553207	0.582378	0.970467	0.859287	-5.65339
P62076	Timm13	0.0565187	-0.148267	0.261304	19.1372	0.550782	0.583597	0.971643	0.860167	-5.73941
Q6PST4	Atl1	-0.0526272	-0.243548	0.138294	18.4444	-0.550103	0.584061	0.971643	0.860402	-5.73976
P10888	Cox4i1	0.0656724	-0.17325	0.304594	21.7096	0.548546	0.585123	0.972596	0.860769	-5.74056
Q9WV63	Kif2a	0.0415878	-0.110022	0.193198	18.8694	0.547425	0.585888	0.97263	0.861205	-5.74113
Q66HF3	Etfdh	-0.0669665	-0.311248	0.177315	18.5945	-0.547083	0.586122	0.97263	0.861205	-5.7413
G3V9W0	Cetn2	0.0800028	-0.212263	0.372268	17.2411	0.546278	0.586672	0.972731	0.861695	-5.74171
D3ZZR9	Fkbp2	0.19637	-0.523299	0.916039	17.0444	0.545331	0.587462	0.973229	0.862215	-5.742
A0A0G2JZK7	Slc8a2	-0.0624573	-0.291833	0.166918	19.9285	-0.543404	0.588638	0.973551	0.862373	-5.74318
A0A0G2K6J5	Myl6	0.082036	-0.219558	0.38363	19.8753	0.542836	0.589027	0.973551	0.862373	-5.74346
P04636	Mdh2	0.0901215	-0.241285	0.421528	23.2012	0.542692	0.589125	0.973551	0.862373	-5.74354
G3V8T5	Ruvbl2	-0.0880012	-0.413041	0.237038	18.09	-0.540305	0.590761	0.974392	0.863416	-5.74474
P27605	Hprt1	-0.107391	-0.5044	0.289618	18.9583	-0.539827	0.591089	0.974392	0.863504	-5.74498
A0A0H2UHE1	Suclg1	-0.0752264	-0.353944	0.203491	21.7201	-0.538633	0.591908	0.974392	0.864383	-5.74558
P34058	Hsp90ab1	0.0395407	-0.107285	0.186367	21.425	0.537438	0.592729	0.974392	0.864841	-5.74618
O35867	Ppp1r9a	-0.0732195	-0.345199	0.19876	17.1355	-0.537252	0.592857	0.974392	0.864921	-5.74628
Q62609	Olfm1	0.127743	-0.347339	0.602825	18.0906	0.536606	0.5933	0.974392	0.864982	-5.7466
A0A0G2K3V4		-0.0612956	-0.289751	0.167159	19.3336	-0.535445	0.594098	0.974392	0.865492	-5.74718
M0R3U3	Ildr2	0.136325	-0.372564	0.645214	16.7476	0.535066	0.59444	0.974392	0.86562	-5.74725
O35264	Pafah1b2	-0.0797208	-0.377226	0.217785	19.851	-0.534765	0.594566	0.974392	0.86562	-5.74752
D3ZMS0	LOC100911713	0.151157	-0.41384	0.716154	17.5366	0.534207	0.595003	0.974392	0.865658	-5.74775
B2RZ79	Iscu	-0.161214	-0.76463	0.442202	17.4401	-0.534125	0.595176	0.974392	0.865658	-5.69263
G3V864	Lppr4	0.0619891	-0.169944	0.293922	19.8394	0.533384	0.595516	0.974392	0.865731	-5.74821
D4ABI7	LOC100365676	-0.0793077	-0.377312	0.218696	19.7802	-0.53125	0.597012	0.974764	0.866536	-5.74924
P23385-2	Grm1	-0.106921	-0.508896	0.295054	16.5552	-0.530826	0.597278	0.974764	0.866536	-5.74948
G3V7W1-2	Pdcd6	0.126772	-0.35119	0.604734	17.1691	0.529317	0.598319	0.974764	0.867155	-5.75023
A0A0G2JWA3	Xpo7	-0.112417	-0.536346	0.311512	17.4073	-0.529206	0.598395	0.974764	0.867155	-5.75028
D4A133	Atp6v1a	-0.0369253	-0.17658	0.10273	22.5689	-0.52766	0.599462	0.974764	0.867224	-5.75104
Q6AY99	Akr1b10	-0.0804811	-0.385268	0.224306	17.8483	-0.526968	0.59994	0.974764	0.867224	-5.75138
Q6AYQ8	Fahd1	0.105275	-0.293492	0.504042	19.5475	0.526856	0.600017	0.974764	0.867224	-5.75144
D4A9L5	Epb41l1	-0.0399402	-0.191495	0.111614	20.1539	-0.52593	0.600657	0.974764	0.867224	-5.75189
A0A1B0GWU2	Elavl2	0.111515	-0.312637	0.535667	16.9558	0.52579	0.600951	0.974764	0.867224	-5.7106
Q5XIG4	Ociad1	0.161579	-0.452825	0.775983	17.2824	0.52543	0.60111	0.974764	0.867224	-5.75204
P30904	Mif	0.0784459	-0.219614	0.376505	21.3301	0.525235	0.601137	0.974764	0.867224	-5.75223
M0RBJ7	C3	-0.171846	-0.826218	0.482526	17.1044	-0.524227	0.60186	0.975141	0.867224	-5.75269
Q6PEC4	Skp1	-0.0727639	-0.35057	0.205042	19.4172	-0.522711	0.602884	0.97534	0.867395	-5.75347
B2GV54	Nceh1	0.059823	-0.168627	0.288273	18.8161	0.522594	0.602964	0.97534	0.867395	-5.75352
D3ZJR1	Eps15l1	-0.0539671	-0.260733	0.152798	17.8983	-0.52088	0.604151	0.976466	0.867917	-5.75436
F1LMR7	Dpp6	-0.0909382	-0.440634	0.258758	18.8423	-0.51897	0.605476	0.977148	0.86908	-5.75529
G3V8Z9	Cops7a	-0.0765719	-0.37241	0.219266	18.1776	-0.516538	0.607163	0.977148	0.86973	-5.75646
B0BNA7	Eif3i	0.0629366	-0.180586	0.306459	17.2843	0.515763	0.607702	0.977148	0.86973	-5.75683
F1MA98	Tpr	0.115961	-0.332746	0.564668	16.5295	0.515746	0.607713	0.977148	0.86973	-5.75684
Q03555-6	Gphn	0.0634724	-0.182213	0.309158	18.99	0.515575	0.607832	0.977148	0.86973	-5.75693
P85973	Pnp	0.0795919	-0.228523	0.387706	20.1688	0.515518	0.607872	0.977148	0.86973	-5.75695
A0A5D0	Cd200	0.132125	-0.379698	0.643947	18.3483	0.51517	0.608114	0.977148	0.869765	-5.75712
P28480	Tcp1	0.034757	-0.100032	0.169546	19.7044	0.514607	0.608505	0.977148	0.869877	-5.75739
F1LPG9	Fam21c	0.151171	-0.437835	0.740176	17.1271	0.512628	0.609959	0.977843	0.870534	-5.74694
Q5XIH3	Ndufv1	0.0347307	-0.101324	0.170785	20.327	0.509434	0.612106	0.977843	0.871987	-5.75986
P51583	Paics	-0.0637596	-0.313713	0.186194	17.4135	-0.509065	0.612363	0.977843	0.872048	-5.76004
Q63413	Ddx39b	-0.0493056	-0.242832	0.144221	18.6366	-0.508443	0.612797	0.977843	0.872409	-5.76033
A0A140UHX6		-0.0560302	-0.276025	0.163965	18.3791	-0.508271	0.612917	0.977843	0.872409	-5.76042
D3ZDX5	Plxnb1	-0.113257	-0.558321	0.331808	16.4069	-0.50784	0.613218	0.977843	0.872409	-5.76062
D4A781	Ipo5	0.133202	-0.390415	0.656819	17.7774	0.507673	0.613334	0.977843	0.872409	-5.7607
F1M542	Adam22	-0.0664783	-0.328021	0.195064	18.0841	-0.507252	0.613628	0.977843	0.872409	-5.7609
F1LPQ9	Akap2	-0.113542	-0.560739	0.333655	17.2645	-0.506832	0.613946	0.977843	0.872409	-5.76103
A0A0H2UI35	Homer1	-0.0804673	-0.397364	0.23643	17.7788	-0.506743	0.613983	0.977843	0.872409	-5.76114
A0A140TAB4	H2afy	-0.110616	-0.546696	0.325464	18.6055	-0.506219	0.614349	0.977843	0.872491	-5.76139
P52481	Cap2	-0.039627	-0.196755	0.117501	19.867	-0.503296	0.616391	0.980308	0.873404	-5.76276
Q5BJU7	Wasf1	0.046966	-0.139556	0.233488	19.2028	0.502505	0.616944	0.980324	0.87402	-5.76314
O88871	Gabbr2	0.151505	-0.450944	0.753954	17.6259	0.501873	0.617387	0.980324	0.874223	-5.76343
P40112	Psmb3	-0.197171	-0.984191	0.589848	17.916	-0.499972	0.618718	0.980353	0.875253	-5.76432
O08700	Vps45	0.101466	-0.303717	0.506649	16.9865	0.499754	0.61887	0.980353	0.875253	-5.76442
E9PT53	Wfs1	-0.357328	-1.7862	1.07154	15.9418	-0.499491	0.61913	0.980353	0.875516	-5.76448
P62762	Vsnl1	-0.123301	-0.617184	0.370581	19.4526	-0.49823	0.619938	0.980353	0.875725	-5.76513
A0A0A0MY16	Cadm2	-0.0517175	-0.259007	0.155572	21.0081	-0.497906	0.620166	0.980353	0.875839	-5.76528
B0BN83	Armc1	-0.0572184	-0.287438	0.173001	18.9692	-0.495998	0.621504	0.980353	0.876543	-5.76617
A0A0G2JVK4	Nln	0.121126	-0.366391	0.608644	16.6212	0.495833	0.621619	0.980353	0.876543	-5.76624
D4A2C6	Lsm4	0.133374	-0.405153	0.6719	16.6847	0.495463	0.622094	0.980353	0.87659	-5.71306
P61983	Ywhag	0.0566265	-0.172195	0.285448	22.5474	0.493866	0.623001	0.980353	0.87708	-5.76715
Q68FQ9	Lancl2	-0.0984001	-0.49613	0.29933	18.6033	-0.493735	0.623093	0.980353	0.87708	-5.76721
P19944	Rplp1	0.074081	-0.225422	0.373584	21.0543	0.493754	0.623103	0.980353	0.87708	-5.76718
P35213	Ywhab	0.058273	-0.177527	0.294073	22.6229	0.493186	0.623478	0.980353	0.877284	-5.76747
M0RAK2	LOC684270	0.195657	-0.596834	0.988148	17.7026	0.492705	0.623816	0.980353	0.87736	-5.76769
Q498U4	Sarnp	0.0743016	-0.228017	0.37662	17.4449	0.490478	0.625383	0.981256	0.878733	-5.76871
P07323	Eno2	-0.0459969	-0.233362	0.141368	22.6717	-0.489922	0.625775	0.981256	0.87918	-5.76897
Q8VIL3	Zwint	-0.129367	-0.657812	0.399078	18.539	-0.488551	0.62674	0.981256	0.880122	-5.76959
Q99N27	Snx1	-0.0712831	-0.362623	0.220057	17.0031	-0.488284	0.626928	0.981256	0.880134	-5.76971
O35413	Sorbs2	-0.133957	-0.681518	0.413604	16.7842	-0.488224	0.62697	0.981256	0.880134	-5.76974
P13803	Etfa	-0.0632208	-0.322579	0.196137	18.8332	-0.48646	0.628213	0.981256	0.881168	-5.77054
F1LP59	Rab3gap1	0.0772873	-0.240321	0.394895	17.24	0.485627	0.628801	0.981256	0.881568	-5.77092
Q8VHK7	Hdgf	0.131202	-0.409159	0.671563	16.8706	0.485913	0.62884	0.981256	0.881568	-5.7457
P62845	Rps15	0.114698	-0.357632	0.587028	17.9247	0.484885	0.629372	0.981256	0.881724	-5.74331
Q6DGG0	Ppid	-0.0910463	-0.466167	0.284075	17.6098	-0.484371	0.629688	0.981256	0.881852	-5.77149
Q68FX1	Mpi	-0.0398539	-0.20412	0.124412	18.2905	-0.484183	0.62982	0.981256	0.881852	-5.77158
D4AEK9	Ccdc6	0.0792921	-0.248568	0.407152	16.8376	0.482778	0.630836	0.981982	0.882276	-5.77219
D3ZCI0	Gk	-0.146142	-0.751875	0.45959	16.4041	-0.482339	0.631274	0.981982	0.882276	-5.77227
Q8CFD0	Sfxn5	-0.0585629	-0.301426	0.184301	19.4614	-0.481223	0.631911	0.982204	0.882276	-5.77291
Q811X6	Cryl1	0.0425987	-0.135104	0.220301	17.807	0.478398	0.633909	0.982306	0.883184	-5.77418
D4A1V5	Kif21a	-0.0463869	-0.240282	0.147508	18.4867	-0.477437	0.63459	0.982306	0.883449	-5.7746
B5DFK6	Ap3d1	-0.0832063	-0.431912	0.2655	18.0328	-0.476193	0.635471	0.982306	0.883892	-5.77516
F1M4H5	Nova2	-0.1269	-0.66166	0.407859	16.5383	-0.473707	0.637257	0.982306	0.885302	-5.77624
P62278	Rps13	-0.0839457	-0.437711	0.26982	18.3069	-0.473554	0.637343	0.982306	0.885318	-5.77633
G3V8G2	Psmd5	-0.0927859	-0.484038	0.298467	17.4395	-0.473273	0.637543	0.982306	0.885492	-5.77645
E9PT29	Ddx17	-0.0791606	-0.413988	0.255667	17.346	-0.471819	0.638575	0.982306	0.88581	-5.77709
O35814	Stip1	0.0520211	-0.169769	0.273811	19.515	0.468084	0.641229	0.982306	0.887615	-5.77873
A0A0G2K0B4	Nedd4	-0.0714348	-0.377042	0.234172	17.5132	-0.46648	0.642371	0.982306	0.888886	-5.77943
M0RBL8	Tceal6	0.0528558	-0.173467	0.279179	20.0166	0.46607	0.642663	0.982306	0.888981	-5.77961
P14841	Cst3	0.102536	-0.337217	0.542289	21.2148	0.465321	0.643196	0.982306	0.889512	-5.77994
Q9ERS3	Cacna2d1	0.0263508	-0.0869285	0.13963	19.2409	0.464227	0.643976	0.982306	0.890037	-5.78041
P84087	Cplx2	-0.0415551	-0.22046	0.13735	21.9933	-0.463542	0.644464	0.982306	0.890189	-5.78071
G3V8C3	Vim	0.183415	-0.60637	0.9732	18.929	0.46346	0.644523	0.982306	0.890189	-5.78075
Q5XIC6	Psmd12	-0.102956	-0.546805	0.340893	16.7892	-0.462916	0.644911	0.982306	0.890189	-5.78098
P08461	Dlat	-0.0494647	-0.26276	0.163831	21.0537	-0.462807	0.644988	0.982306	0.890189	-5.78103
Q5RJK5	LOC100360260	-0.13081	-0.696311	0.434691	18.4823	-0.46245	0.645387	0.982306	0.890374	-5.75576
Q64605-2	Ptprs	0.0357345	-0.119188	0.190657	18.5135	0.46032	0.646763	0.982306	0.891499	-5.7821
D4AB03	Fam120a	0.0756409	-0.252351	0.403633	16.9977	0.460235	0.646823	0.982306	0.891499	-5.78214
A0A140TAI1	Ubqln1	0.0504139	-0.168504	0.269332	18.5967	0.459574	0.647295	0.982306	0.891526	-5.78242
D3ZKK5	Mtmr1	0.13484	-0.45094	0.72062	17.2406	0.459634	0.647297	0.982306	0.891526	-5.78236
F1LNX7	Tssc1	-0.0886692	-0.474037	0.296698	16.7152	-0.459182	0.647576	0.982306	0.891641	-5.78259
Q6P6V0	Gpi	0.0612143	-0.204981	0.327409	22.0851	0.458923	0.647761	0.982306	0.891687	-5.7827
P32851	Stx1a	-0.0944269	-0.506386	0.317532	18.4144	-0.457434	0.648825	0.982306	0.892228	-5.78334
P10111	Ppia	-0.0601559	-0.32269	0.202378	22.8844	-0.457277	0.648938	0.982306	0.89228	-5.7834
Q6P7A7	Rpn1	0.0333008	-0.112192	0.178793	18.328	0.456773	0.649298	0.982306	0.892363	-5.78362
Q6P9V1	Cd81	-0.162526	-0.873127	0.548076	20.0288	-0.456439	0.649537	0.982306	0.892384	-5.78376
Q5FVM6	Mtmr12	0.0670577	-0.226269	0.360385	16.9249	0.456229	0.649687	0.982306	0.892384	-5.78385
A0A0G2JTB2	Gbe1	0.103337	-0.349879	0.556552	16.8516	0.455151	0.65048	0.982306	0.893062	-5.78407
P27653	Mthfd1	-0.0394599	-0.212597	0.133677	17.5071	-0.454834	0.650685	0.982306	0.893071	-5.78445
A0A0G2JUL7	Sept11	-0.0402765	-0.21711	0.136557	20.8724	-0.454541	0.650895	0.982306	0.893071	-5.78457
A0A0G2K7K2	Aifm1	0.0515163	-0.174793	0.277826	17.1833	0.45441	0.651011	0.982306	0.893071	-5.76298
Q4QQV4	Hars	-0.0787038	-0.425318	0.26791	17.4547	-0.453144	0.651895	0.982306	0.893854	-5.78516
P39052-4	Dnm2	-0.0809806	-0.438284	0.276323	18.7919	-0.452304	0.652497	0.982306	0.894145	-5.78552
Q71UF4	Rbbp7	-0.0711851	-0.385402	0.243032	17.4069	-0.452112	0.652635	0.982306	0.894145	-5.7856
Q7TPB1	Cct4	-0.0320259	-0.173565	0.109514	19.8737	-0.451554	0.653035	0.982306	0.894145	-5.78583
A0A0G2K1L5	Reep2	0.115337	-0.39539	0.626064	17.5859	0.450679	0.653662	0.982306	0.894145	-5.7862
P62260	Ywhae	-0.0707626	-0.384636	0.243111	22.7208	-0.44992	0.654206	0.982306	0.894145	-5.78652
B0BN81	Rps5	0.0501719	-0.172419	0.272763	18.1952	0.44982	0.654278	0.982306	0.894145	-5.78656
D4A4L4	Map7d2	0.162723	-0.559561	0.885007	17.0562	0.449601	0.654436	0.982306	0.894145	-5.78666
P62193	Psmc1	-0.0446939	-0.243235	0.153848	17.451	-0.449246	0.654691	0.982306	0.894145	-5.78681
Q4V8N0	Tinagl1	0.185391	-0.640447	1.01123	15.4721	0.449422	0.654813	0.982306	0.894145	-5.75822
P84076	Hpca	-0.121343	-0.66067	0.417984	20.2269	-0.449002	0.654866	0.982306	0.894145	-5.78691
F1LMM8	Pdk2	-0.113577	-0.618996	0.391842	18.5885	-0.448461	0.655254	0.982306	0.894264	-5.78713
Q64537	Capns1	-0.0673996	-0.368128	0.233328	17.6968	-0.447271	0.656109	0.982306	0.894757	-5.78763
P60123	Ruvbl1	0.0523714	-0.181539	0.286282	17.1069	0.446819	0.656433	0.982306	0.894757	-5.78782
M0RB22	Ptprd	0.135478	-0.470137	0.741093	16.9576	0.446814	0.656503	0.982306	0.894757	-5.78771
Q9Z1N4	Bpnt1	-0.0487528	-0.266659	0.169153	18.6112	-0.446495	0.656666	0.982306	0.894757	-5.78796
Q64361	Lxn	0.130744	-0.454326	0.715815	17.2115	0.446088	0.65698	0.982306	0.894879	-5.78811
P00388	Por	0.0756222	-0.264342	0.415586	17.6551	0.443918	0.658518	0.982306	0.895339	-5.78903
B2RZ27	Sh3bgrl3	0.0647529	-0.226888	0.356393	19.5669	0.443096	0.65911	0.982306	0.895925	-5.78937
A0A0G2K0T6	Sncg	0.178458	-0.629256	0.986172	17.9999	0.440925	0.660673	0.982306	0.897067	-5.79027
P11980-2	Pkm	-0.0437849	-0.242032	0.154462	20.5686	-0.440762	0.660791	0.982306	0.897067	-5.79033
F1M863	Ppfia4	-0.0819792	-0.453472	0.289513	16.1767	-0.440637	0.660923	0.982306	0.897067	-5.79035
P02680-2	Fgg	0.166736	-0.588969	0.922442	17.1136	0.440316	0.661112	0.982306	0.897067	-5.79052
Q62844	Fyn	-0.109427	-0.606743	0.387889	16.6202	-0.43936	0.661844	0.982306	0.89761	-5.79087
P14668	Anxa5	-0.131629	-0.730073	0.466814	17.8859	-0.438951	0.662096	0.982306	0.897747	-5.79108
P62628	Dynlrb1	-0.0650736	-0.361638	0.231491	19.4893	-0.437898	0.662856	0.982306	0.89809	-5.79151
F1LUT4	Atp8a1	-0.0506887	-0.282044	0.180667	19.6726	-0.437238	0.663331	0.982306	0.898122	-5.79178
O88377	Pip4k2b	0.0395585	-0.141015	0.220132	18.8128	0.437191	0.663366	0.982306	0.898122	-5.7918
Q641Y2	Ndufs2	-0.0566248	-0.315489	0.20224	20.3666	-0.436536	0.663838	0.982306	0.89836	-5.79206
P17077	Rpl9	-0.106371	-0.592792	0.38005	17.519	-0.436414	0.663926	0.982306	0.89836	-5.79211
D3ZQG6	Trim2	-0.0514271	-0.286919	0.184065	18.7494	-0.435816	0.664358	0.982306	0.898469	-5.79236
A0A0G2JSU3	Pkn3	-0.0774013	-0.432379	0.277577	18.0908	-0.435386	0.664711	0.982306	0.898469	-5.7925
A0A0G2JZY3		-0.101169	-0.56527	0.362933	16.0486	-0.435398	0.664724	0.982306	0.898469	-5.79234
Q5FVI3	Lrrc57	-0.0597158	-0.334013	0.214581	16.862	-0.434583	0.665269	0.982306	0.898585	-5.79284
Z4YNP1	Celf2	-0.230641	-1.29104	0.829757	15.9974	-0.434561	0.665351	0.982306	0.898585	-5.77384
F1M779	Cltc	-0.0466597	-0.261151	0.167832	22.5511	-0.434129	0.665577	0.982306	0.898629	-5.79304
Q6AYT3	Rtcb	0.0737824	-0.267338	0.414902	18.1295	0.431651	0.667368	0.982516	0.899478	-5.79405
P05065	Aldoa	0.022993	-0.0833738	0.12936	23.3246	0.431396	0.667552	0.982516	0.899478	-5.79415
P62282	Rps11	-0.0455961	-0.257278	0.166086	19.3717	-0.429863	0.668662	0.982516	0.899812	-5.79477
F1M787	Ctnnd2	-0.0323738	-0.183257	0.118509	18.6503	-0.428193	0.669871	0.982516	0.899951	-5.79544
Q3MHS9	Cct6a	-0.0353517	-0.200351	0.129648	19.6811	-0.427577	0.670317	0.982516	0.899951	-5.79568
B2RZ78	Vps29	0.0719651	-0.264025	0.407955	18.4258	0.427447	0.670412	0.982516	0.899951	-5.79573
F1M8H6	Pip5k1c	-0.0271851	-0.154213	0.0998423	18.6477	-0.427091	0.670669	0.982516	0.899951	-5.79588
Q9WVA1	Timm8a	0.107739	-0.396263	0.61174	18.9792	0.426606	0.671021	0.982516	0.90023	-5.79607
D4AEH9	Agl	-0.0516991	-0.293697	0.190299	18.0852	-0.426342	0.671212	0.982516	0.900384	-5.79618
G3V9Z3	Maoa	0.0450598	-0.16619	0.25631	18.872	0.425676	0.671695	0.982516	0.900507	-5.79644
P19945	Rplp0	0.0728894	-0.269318	0.415097	18.7819	0.425071	0.672134	0.982516	0.900507	-5.79668
Q924S5	Lonp1	0.037115	-0.137599	0.211829	17.6824	0.423945	0.672951	0.982516	0.901096	-5.79713
D3ZVR7	Fam213b	-0.0558299	-0.319016	0.207356	17.2674	-0.423577	0.673259	0.982516	0.901259	-5.79724
A0A0G2K398	Gpx4	-0.181524	-1.03815	0.6751	17.5286	-0.423645	0.6733	0.982516	0.901259	-5.77244
P54319	Plaa	0.134764	-0.502945	0.772474	16.7936	0.422348	0.674218	0.982516	0.901577	-5.79762
P04904	Gsta3	-0.0937917	-0.540423	0.35284	19.5724	-0.419084	0.676482	0.982516	0.903326	-5.79904
P40307	Psmb2	-0.122676	-0.70702	0.461668	18.1379	-0.418965	0.676569	0.982516	0.903326	-5.79909
G3V9J7	Rabep1	-0.0450924	-0.259924	0.169739	16.9012	-0.418882	0.676629	0.982516	0.903326	-5.79912
Q6AXS5	Serbp1	0.0430567	-0.162098	0.248211	19.07	0.418838	0.676661	0.982516	0.903326	-5.79914
P29066	Arrb1	0.0401559	-0.151306	0.231618	18.0132	0.418556	0.676867	0.982516	0.903398	-5.79925
D4A1R8	Cpne1	-0.109215	-0.630973	0.412543	16.7591	-0.417965	0.677337	0.982516	0.903508	-5.79945
Q6P9U8	Eif3h	-0.0698984	-0.4052	0.265403	17.3496	-0.416138	0.678646	0.982516	0.903724	-5.80018
F1M392	Limch1	-0.0893923	-0.51849	0.339706	16.9383	-0.415748	0.67891	0.982516	0.903724	-5.80034
P63004	Pafah1b1	0.0739427	-0.281096	0.428981	18.2281	0.41563	0.678997	0.982516	0.903724	-5.80039
A0A0G2K719	Ddx3y	-0.0626095	-0.363613	0.238394	18.1023	-0.415102	0.679381	0.982516	0.903724	-5.8006
A0A0G2K9Q7	Map1lc3b	-0.165873	-0.965455	0.633709	17.8206	-0.414113	0.680122	0.982516	0.9041	-5.80096
A0A0G2K2P5	Tjp1	0.0555117	-0.212831	0.323854	17.1185	0.41284	0.68103	0.982516	0.904501	-5.80147
Q6AYG3	Prune	-0.123067	-0.718315	0.472181	16.5162	-0.412602	0.681203	0.982516	0.904557	-5.80156
Q5XI19	Fermt2	-0.127724	-0.745936	0.490488	16.1357	-0.412657	0.681223	0.982516	0.904557	-5.80114
Q4V7D4	Fam126b	-0.0564336	-0.330553	0.217686	17.0403	-0.410963	0.682418	0.982516	0.905353	-5.80218
D4A1Q9	Ttll12	0.0629505	-0.242763	0.368664	16.7048	0.410934	0.68242	0.982516	0.905353	-5.8022
G3V6H5	Slc25a11	-0.129074	-0.75684	0.498692	19.0317	-0.410326	0.682864	0.982516	0.905423	-5.80244
P60841	Ensa	0.191639	-0.741627	1.1249	17.547	0.409794	0.683252	0.982516	0.905659	-5.80264
O88637-2	Pcyt2	-0.123709	-0.727889	0.480471	17.0303	-0.408622	0.684108	0.982516	0.906275	-5.80309
M0RBJ0	Gng2	-0.202554	-1.19224	0.787132	18.0559	-0.408668	0.684113	0.982516	0.906275	-5.80302
Q5U2N3	Pitpnm1	-0.0833097	-0.490683	0.324064	17.0409	-0.408121	0.684474	0.982516	0.906551	-5.80328
D4AE00	Ap3b2	-0.067747	-0.399916	0.264422	18.8341	-0.407022	0.685277	0.982516	0.907011	-5.8037
O08629	Trim28	0.0586657	-0.229106	0.346437	17.3059	0.406839	0.685411	0.982516	0.907087	-5.80377
F7F350		-0.0800494	-0.473276	0.313177	16.4973	-0.406483	0.68571	0.982516	0.907145	-5.80387
Q5RKI0	Wdr1	-0.0223698	-0.13252	0.0877806	20.4458	-0.405288	0.686545	0.982516	0.907412	-5.80436
A0A0G2K7G2		-0.0817739	-0.484749	0.321201	17.2556	-0.405195	0.686652	0.982516	0.907412	-5.8043
Q6S3A5	Plec	-0.025823	-0.153581	0.101935	20.1654	-0.403373	0.687946	0.982516	0.90758	-5.80508
P07825	Syp	-0.101517	-0.604074	0.40104	20.0516	-0.403124	0.688128	0.982516	0.90758	-5.80518
Q3KRF2	Hdlbp	0.0392149	-0.154977	0.233406	18.6379	0.403002	0.688218	0.982516	0.90758	-5.80522
Q6IMZ3	Anxa6	0.0728247	-0.288194	0.433843	19.0978	0.402565	0.688538	0.982516	0.907715	-5.80539
D4A3D4	Abhd3	0.114049	-0.452194	0.680292	16.258	0.402414	0.688728	0.982516	0.907751	-5.77603
P63012	Rab3a	0.0330223	-0.131407	0.197451	22.8641	0.400789	0.689839	0.982516	0.908176	-5.80605
Q9R1B1	Timm10b	0.0631003	-0.25115	0.37735	17.0416	0.400722	0.689888	0.982516	0.908176	-5.80608
D4A0E8	Prmt5	-0.0682293	-0.408684	0.272225	16.733	-0.399943	0.690459	0.982516	0.908274	-5.80637
F1M3H8	Hnrnpa0	0.0654402	-0.261411	0.392291	18.0861	0.39956	0.69074	0.982516	0.908295	-5.80651
A0A0G2JY26	Dnajc6	-0.0433171	-0.259807	0.173173	19.3153	-0.399308	0.690924	0.982516	0.908438	-5.80661
B1WC16	Bclaf1	0.103066	-0.413542	0.619674	15.8801	0.398253	0.691717	0.98294	0.908867	-5.80699
P61589	Rhoa	-0.0314929	-0.189841	0.126855	20.2191	-0.396906	0.692686	0.983615	0.909217	-5.8075
P63259	Actg1	0.0247437	-0.100116	0.149603	24.7833	0.395485	0.693729	0.984054	0.909475	-5.80803
P52759	Hrsp12	-0.102276	-0.620128	0.415576	18.3184	-0.394594	0.694462	0.984054	0.909812	-5.78607
P61203	Cops2	-0.0699729	-0.424726	0.28478	18.0495	-0.393633	0.69509	0.984054	0.910253	-5.80871
A0A0A0MXU2	Coro7	-0.0712694	-0.432929	0.29039	17.9459	-0.393269	0.695358	0.984054	0.910253	-5.80884
Q6MGC4	Pfdn6	-0.0888632	-0.543066	0.365339	17.099	-0.390551	0.697375	0.984054	0.91098	-5.79839
E9PTV0	Guk1	-0.0959282	-0.5872	0.395344	17.7434	-0.390012	0.69781	0.984054	0.911157	-5.79098
F1LVR4	Camk1d	-0.167335	-1.0255	0.690827	16.915	-0.390091	0.697859	0.984054	0.911157	-5.79037
D3ZSZ6	Dgkh	0.0683203	-0.281519	0.418159	18.5764	0.389734	0.697958	0.984054	0.911157	-5.81014
Q06647	Atp5o	0.0421981	-0.174332	0.258728	21.608	0.388921	0.698556	0.984054	0.911342	-5.81043
A0A0H2UHJ5	Zfr	-0.0635912	-0.390712	0.263529	17.0096	-0.388056	0.699211	0.984054	0.911727	-5.81051
A0A0G2K6H2	Gstz1	-0.108465	-0.669722	0.452792	16.8581	-0.386109	0.700703	0.984054	0.912662	-5.81117
Q561S0	Ndufa10	-0.0294528	-0.181795	0.122889	20.4365	-0.385827	0.700835	0.984054	0.912662	-5.81156
Q63881	Kcnd2	-0.0821481	-0.507897	0.343601	17.0819	-0.385167	0.70134	0.984054	0.912662	-5.81178
D3ZZK3	Epha4	0.0418583	-0.175473	0.259189	18.3378	0.384367	0.701912	0.984054	0.912732	-5.81208
D4ADD7	Glrx5	-0.0955777	-0.592265	0.40111	17.9947	-0.38435	0.701981	0.984054	0.912732	-5.81204
F1LZV1	Kalrn	0.154425	-0.649484	0.958333	15.9734	0.384158	0.702205	0.984054	0.912732	-5.75996
D3ZUW0	Psd3	0.0285037	-0.119663	0.176671	19.2812	0.383916	0.702245	0.984054	0.912732	-5.81224
A0A0G2JUG7		0.0369467	-0.155494	0.229388	18.3657	0.383147	0.702813	0.984054	0.912732	-5.81252
P33124	Acsl6	-0.0515181	-0.320457	0.217421	18.3639	-0.38229	0.703445	0.984054	0.912732	-5.81283
F1LV13	Hnrnpm	0.0563011	-0.237837	0.350439	19.032	0.38199	0.703666	0.984054	0.912732	-5.81293
Q5FVI4	Cend1	-0.0581152	-0.362116	0.245886	20.3016	-0.381506	0.704023	0.984054	0.912752	-5.81311
Q04462	Vars	0.0300612	-0.128254	0.188376	18.0843	0.378939	0.70592	0.984054	0.913545	-5.81402
P02401	Rplp2	-0.0793828	-0.497845	0.33908	20.2142	-0.378579	0.706186	0.984054	0.913545	-5.81415
O88794	Pnpo	-0.0541784	-0.339918	0.231562	17.2549	-0.378392	0.706325	0.984054	0.913545	-5.81421
D4AB01	Hint2	-0.0492796	-0.310012	0.211453	18.8136	-0.377189	0.707214	0.984054	0.914038	-5.81464
Q58FK9	Ccbl2	-0.15448	-0.973518	0.664559	17.1475	-0.376951	0.707484	0.984054	0.914089	-5.81459
D4A565	Ndufb5	0.0451771	-0.194662	0.285016	18.8825	0.375911	0.70816	0.984054	0.914566	-5.81509
P35332	Hpcal4	-0.0742075	-0.469948	0.321533	18.2468	-0.374217	0.709413	0.984054	0.915318	-5.81568
P19511	Atp5f1	-0.0912326	-0.578113	0.395648	20.6986	-0.373951	0.709611	0.984054	0.915318	-5.81577
P35435	Atp5c1	0.0352428	-0.152882	0.223367	21.0243	0.373863	0.709676	0.984054	0.915318	-5.81581
D3ZT36	Adam23	0.0335307	-0.145523	0.212585	18.0598	0.373719	0.709782	0.984054	0.915318	-5.81586
D3ZA31	Mtmr2	0.0757346	-0.329035	0.480504	16.7338	0.373501	0.709961	0.984054	0.915318	-5.81592
D4A1J6	Ankfy1	0.0691216	-0.301431	0.439674	17.1938	0.37247	0.710743	0.984054	0.915585	-5.81626
Q5EB62	Slc25a46	-0.0644456	-0.412101	0.28321	17.247	-0.370478	0.712276	0.984054	0.915821	-5.8166
G3V9S0	Cyb5r1	-0.0474619	-0.303785	0.208862	16.9127	-0.369525	0.712891	0.984054	0.915821	-5.81731
P10960	Psap	-0.0741105	-0.474764	0.326543	18.9721	-0.369145	0.713173	0.984054	0.915821	-5.81744
F1LM33	Lrpprc	-0.0389968	-0.24985	0.171857	18.2292	-0.369092	0.713212	0.984054	0.915821	-5.81746
B0LPN4-2	Ryr2	-0.0353905	-0.226865	0.156084	18.7558	-0.368861	0.713384	0.984054	0.915821	-5.81754
B2RZD6	Ndufa4	0.0835682	-0.369238	0.536374	20.0382	0.368312	0.713791	0.984054	0.916051	-5.81773
D4A8H8	Cyfip1	0.0416315	-0.18408	0.267343	18.4539	0.368091	0.713955	0.984054	0.916051	-5.81781
F1LX07	Slc25a12	-0.0754531	-0.484944	0.334037	20.4529	-0.367722	0.714228	0.984054	0.916051	-5.81793
A0A0G2JTD7	Clasp1	0.0594969	-0.263484	0.382478	16.7067	0.367624	0.714301	0.984054	0.916051	-5.81797
F2Z3Q8	Kpnb1	0.0291184	-0.12932	0.187557	18.8578	0.36677	0.714936	0.984054	0.916261	-5.81826
D3ZBL5	Inpp4a	-0.0299516	-0.192924	0.133021	17.2364	-0.366769	0.714936	0.984054	0.916261	-5.81826
Q5RJY4-2	Dhrs7b	0.081359	-0.363399	0.526117	16.6606	0.365833	0.715763	0.984054	0.916491	-5.81849
O08651	Phgdh	-0.0642961	-0.415352	0.28676	19.4317	-0.365506	0.715874	0.984054	0.916491	-5.81869
P25409	Gpt	0.115662	-0.519761	0.751085	17.0425	0.363673	0.717307	0.984054	0.917534	-5.81927
F1M3D2	Dmwd	0.108107	-0.487645	0.703858	16.4103	0.36278	0.71801	0.984054	0.917583	-5.7298
A2VCX1	Tiprl	-0.063763	-0.415261	0.287735	18.0642	-0.362119	0.718409	0.984054	0.917583	-5.81983
Q9QXU9	Pcsk1n	0.0673428	-0.304102	0.438787	20.8607	0.361813	0.71862	0.984054	0.917601	-5.81995
P55051	Fabp7	-0.0670985	-0.437892	0.303695	18.1998	-0.361133	0.719126	0.984054	0.917914	-5.82018
A0A0G2K737	Txnl1	-0.0481466	-0.314379	0.218086	18.4413	-0.360904	0.719296	0.984054	0.917917	-5.82026
P18418	Calr	0.0336808	-0.152638	0.22	19.6413	0.360755	0.719407	0.984054	0.91796	-5.82031
Q6QIX3	Slc30a3	0.0664687	-0.302332	0.435269	17.5624	0.359775	0.720153	0.984054	0.918235	-5.79019
F1M6X3	Kcnq2	-0.0998825	-0.655324	0.455559	16.4351	-0.359626	0.720376	0.984054	0.918312	-5.78539
A0A1P0PBZ6	Trio	-0.099655	-0.654277	0.454968	17.2846	-0.358582	0.721025	0.984054	0.918781	-5.82104
Q6Q7Y5	Gna13	0.036507	-0.167181	0.240195	17.5692	0.357682	0.721695	0.984054	0.918815	-5.82134
Q6PEC1	Tbca	-0.0297708	-0.196403	0.136861	18.4903	-0.356549	0.722539	0.984054	0.918815	-5.82172
Q6IMX4	Ppap2b	0.0991011	-0.455717	0.653919	18.8629	0.35656	0.722548	0.984054	0.918815	-5.8217
Q5U302	Ctnna1	-0.0740079	-0.488548	0.340532	19.4102	-0.356286	0.722736	0.984054	0.918815	-5.82181
D4A720	Srsf7	-0.0563982	-0.372964	0.260168	17.5442	-0.355539	0.723292	0.984054	0.919014	-5.82206
F1M9W9	Trappc8	-0.0748037	-0.495676	0.346069	15.4216	-0.355105	0.723685	0.984054	0.919326	-5.82193
P18163	Acsl1	-0.0569068	-0.378079	0.264265	16.9248	-0.353697	0.724682	0.984736	0.919869	-5.82265
P68182	Prkacb	-0.0753203	-0.501243	0.350602	18.0023	-0.352914	0.725251	0.984835	0.920173	-5.82293
P54900	Scn2b	0.115677	-0.539836	0.771189	16.7376	0.352169	0.725807	0.984917	0.920197	-5.82317
A1L1L6	Rhot1	-0.0301099	-0.202442	0.142222	17.6017	-0.348683	0.728411	0.985455	0.920878	-5.82431
F1LR18	Arhgap39	0.0646805	-0.306855	0.436216	17.0355	0.347424	0.729352	0.985455	0.921471	-5.82472
G3V928	Lrp1	-0.0265774	-0.179889	0.126734	17.8947	-0.34596	0.730447	0.985455	0.921949	-5.8252
Q07310	Nrxn3	0.078633	-0.375388	0.532654	16.8366	0.345633	0.730691	0.985455	0.921949	-5.8253
O35964	Sh3gl1	-0.0504029	-0.342475	0.24167	18.3548	-0.344391	0.731621	0.985455	0.922394	-5.82571
D4A053	Shroom2	0.0714001	-0.344763	0.487563	16.8372	0.342581	0.733008	0.985455	0.922637	-5.82626
P29314	Rps9	-0.0622909	-0.425484	0.300903	17.6392	-0.342274	0.733206	0.985455	0.922637	-5.82639
Q5XIG8	Strap	0.029585	-0.142928	0.202098	17.8906	0.342244	0.733228	0.985455	0.922637	-5.82639
P0C6S7-3	Anks1b	-0.0313287	-0.214328	0.15167	19.3217	-0.341649	0.733674	0.985455	0.922637	-5.82659
D4A772	Dtna	-0.0479026	-0.328132	0.232327	16.4094	-0.34114	0.734056	0.985455	0.922637	-5.82675
A0A0G2JSR7	Matr3	-0.0288545	-0.197739	0.14003	19.7577	-0.340966	0.734186	0.985455	0.922637	-5.8268
O70511-3	Ank3	0.0946763	-0.461419	0.650772	16.7514	0.340841	0.734462	0.985455	0.922637	-5.76401
A0A0G2JTG7	Hnrnph1	-0.0816567	-0.561237	0.397923	18.1718	-0.339795	0.735064	0.985455	0.922637	-5.82718
P62982	Rps27a	0.0386308	-0.189071	0.266333	20.2929	0.338573	0.73598	0.985455	0.923293	-5.82756
Q5M9H4	Atp1b2	0.0314977	-0.154854	0.217849	21.094	0.337313	0.736925	0.985455	0.923615	-5.82796
D3ZI16	Cops6	-0.114882	-0.796799	0.567035	16.9246	-0.336207	0.737756	0.985455	0.924146	-5.82831
P62997	Tra2b	0.0644745	-0.318752	0.447701	16.5343	0.335939	0.737989	0.985455	0.924146	-5.82837
F1LPP6	Akap5	-0.0624536	-0.433537	0.30863	18.0739	-0.335871	0.738008	0.985455	0.924146	-5.82842
Q3B7U9	Fkbp8	0.0253887	-0.125496	0.176274	17.8144	0.3358	0.738061	0.985455	0.924146	-5.82844
B1WBY1	Cul1	-0.0952137	-0.661417	0.47099	16.7088	-0.335685	0.738163	0.985455	0.924146	-5.82846
Q63065	Pdk1	0.0763603	-0.379228	0.531949	17.0527	0.335675	0.738356	0.985455	0.924146	-5.71161
A0A5H1ZRU5	Necab2	-0.0360744	-0.251023	0.178874	19.5416	-0.334929	0.738715	0.985455	0.924188	-5.82871
Q6AYD5	Gspt1	0.0256681	-0.127862	0.179199	17.6639	0.333646	0.739679	0.985455	0.924277	-5.82911
O08662	Pi4ka	-0.0599256	-0.418386	0.298534	17.4598	-0.333625	0.739695	0.985455	0.924277	-5.82912
D3Z8D7	LOC100361854	0.0936475	-0.467063	0.654359	17.4136	0.333398	0.739881	0.985455	0.924277	-5.81011
F1LN69	Mink1	-0.0287151	-0.200647	0.143217	18.5567	-0.333304	0.739936	0.985455	0.924277	-5.82922
A0A0H2UHG3	Cul5	-0.0841802	-0.589216	0.420855	16.6219	-0.332922	0.740271	0.985455	0.924277	-5.82931
Q7TQ94-2	Nit1	0.0262175	-0.131171	0.183606	18.2612	0.332434	0.74059	0.985455	0.924516	-5.82949
A0A0G2JSH2	Bdh1	-0.0379438	-0.266021	0.190134	19.0623	-0.332005	0.740912	0.985455	0.924532	-5.82962
Q5U362	Anxa4	-0.0434189	-0.305122	0.218284	16.8477	-0.331099	0.741593	0.985455	0.925029	-5.82991
P18297	Spr	0.0909751	-0.459058	0.641008	17.4102	0.330776	0.741954	0.985455	0.925154	-5.80807
Q68FS2	Cops4	0.0444745	-0.225613	0.314562	18.5237	0.328619	0.743459	0.985455	0.925243	-5.83067
D3ZAA9	Mpp2	0.0361148	-0.183222	0.255451	18.4494	0.328595	0.743477	0.985455	0.925243	-5.83068
P63041	Cplx1	-0.0660619	-0.467485	0.335361	20.8408	-0.328424	0.743605	0.985455	0.925243	-5.83073
Q80YV8	Cxcl12	0.081755	-0.416053	0.579563	17.3189	0.328025	0.743953	0.985455	0.925243	-5.80165
F1LNF0	Myh14	-0.0623589	-0.442695	0.317977	17.5208	-0.327679	0.744247	0.985455	0.925402	-5.83081
Q63151	Acsl3	0.077355	-0.394975	0.549684	17.586	0.326925	0.744749	0.985455	0.925737	-5.83118
Q56A26	Opalin	-0.100396	-0.719255	0.518463	18.4279	-0.324544	0.746662	0.985455	0.926236	-5.78675
D4AEH3	Psmd7	-0.0487229	-0.348496	0.25105	17.8755	-0.32436	0.746667	0.985455	0.926236	-5.83197
Q08163	Cap1	0.032584	-0.16825	0.233418	20.772	0.323783	0.747101	0.985455	0.926531	-5.83215
A0A0G2KAM3	Pdhb	-0.0222716	-0.160801	0.116258	22.0709	-0.320845	0.749317	0.985455	0.92774	-5.83303
D3ZK97	H3f3c	0.155974	-0.816821	1.12877	21.768	0.319977	0.749972	0.985455	0.927944	-5.83329
O54922	Exoc7	-0.0585492	-0.424068	0.306969	16.9008	-0.319755	0.750154	0.985455	0.927944	-5.83335
M0R7F3	Wasf3	0.06132	-0.32165	0.44429	17.035	0.319716	0.750199	0.985455	0.927944	-5.83328
Q7TQ77	Hook3	0.0786443	-0.413238	0.570526	17.9548	0.319747	0.750259	0.985455	0.927944	-5.83328
D3ZT90	Gcdh	0.0795446	-0.417446	0.576535	17.391	0.319498	0.750348	0.985455	0.927958	-5.83343
F1M049	Atxn2	-0.121806	-0.884706	0.641093	16.7904	-0.319302	0.750595	0.985455	0.928166	-5.80943
Q9JJ54-3	Hnrnpd	-0.113675	-0.825952	0.598601	18.8538	-0.318496	0.75109	0.985455	0.92835	-5.83374
A2RUW1	Tollip	0.0842611	-0.449768	0.61829	18.6388	0.315546	0.753431	0.985455	0.929842	-5.76151
G3V949	Clip2	-0.0264774	-0.194255	0.1413	17.4162	-0.314941	0.753776	0.985455	0.930055	-5.83479
G3V9M3	Wdr47	-0.0253914	-0.186414	0.135631	18.1267	-0.314693	0.753964	0.985455	0.930055	-5.83486
Q6AY09	Hnrnph2	-0.0419574	-0.308248	0.224333	20.5783	-0.314441	0.754154	0.985455	0.930055	-5.83494
Q3B7V5	Rab2b	0.0941381	-0.508048	0.696324	17.1103	0.31224	0.755863	0.985455	0.930775	-5.83554
D3ZAP9	Gpd1l	-0.0605197	-0.449599	0.32856	17.2377	-0.310416	0.757199	0.985455	0.931119	-5.83611
B2GUV5	Atp6v1g1	-0.0301206	-0.223927	0.163685	20.3044	-0.310158	0.757395	0.985455	0.931119	-5.83619
B1WBS4	Vps26b	0.108278	-0.588786	0.805343	16.8112	0.31008	0.757468	0.985455	0.931119	-5.8362
A0JPJ7	Ola1	-0.0647589	-0.482338	0.35282	18.0839	-0.30949	0.7579	0.985455	0.931119	-5.83638
Q5PQZ9	Ndufc2	0.0302825	-0.165539	0.226104	19.5191	0.308616	0.758562	0.985455	0.931269	-5.83663
M0R649	Exoc4	0.0574547	-0.314157	0.429066	16.9605	0.308549	0.758613	0.985455	0.931269	-5.83665
F1LQ48	Hnrnpl	0.0435507	-0.239071	0.326172	21.4228	0.307522	0.759391	0.985455	0.931676	-5.83695
P60901	Psma6	0.0334398	-0.184119	0.250999	18.3597	0.306742	0.759982	0.985455	0.932045	-5.83717
P62744	Ap2s1	-0.0578258	-0.434682	0.31903	18.6591	-0.306219	0.760378	0.985455	0.932243	-5.83732
P48500	Tpi1	0.0155631	-0.0860002	0.117126	22.9566	0.305805	0.760692	0.985455	0.932325	-5.83744
B0BMW0	Rab14	0.0187849	-0.104433	0.142003	19.3769	0.304243	0.761877	0.985455	0.932846	-5.83789
F1LSY2	Nptxr	0.0550731	-0.309113	0.41926	18.9512	0.301788	0.763739	0.985455	0.93322	-5.83859
A0A0G2JU49	Mtx1	-0.0744144	-0.567032	0.418204	17.7933	-0.301462	0.763987	0.985455	0.93322	-5.83868
A0A0H2UHQ0	Slc3a2	0.038474	-0.216296	0.293244	19.7054	0.301374	0.764054	0.985455	0.93322	-5.8387
E9PSJ4	Spag9	0.049026	-0.277345	0.375397	16.5741	0.299779	0.765265	0.985455	0.933696	-5.83915
A0A0G2JZM2	Sec23a	0.0625559	-0.354402	0.479514	17.9222	0.299407	0.765547	0.985455	0.933696	-5.83926
G3V7I5	Aldh1b1	0.0292966	-0.16636	0.224953	18.8418	0.29882	0.765994	0.985455	0.933696	-5.83942
A0A0G2JT93	Ctnnb1	0.019655	-0.111636	0.150946	19.6885	0.298761	0.766038	0.985455	0.933696	-5.83944
Q06486	Csnk1d	0.0964453	-0.548444	0.741335	16.2111	0.298539	0.766221	0.985455	0.933696	-5.83949
Q9Z270	Vapa	0.0690092	-0.392501	0.530519	19.093	0.29841	0.766305	0.985455	0.933696	-5.83953
G3V9G3	Camk2b	-0.0285078	-0.219252	0.162237	22.2663	-0.298263	0.766417	0.985455	0.933696	-5.83958
Q01066	Pde1b	0.0490266	-0.280513	0.378566	18.4745	0.296901	0.767452	0.985455	0.933711	-5.83995
P83941	Tceb1	-0.0249221	-0.192493	0.142649	19.1355	-0.296806	0.767524	0.985455	0.933711	-5.83998
D3ZAG3	Map9	0.0730886	-0.422464	0.568641	16.9977	0.294587	0.769253	0.985455	0.933763	-5.81569
Q8K3M6	Erc2	0.0247765	-0.143697	0.19325	18.1704	0.293492	0.770045	0.985455	0.933917	-5.8409
A0A0G2K0X9	Sec31a	-0.0548861	-0.428941	0.319169	17.542	-0.292828	0.77055	0.985455	0.934146	-5.84108
Q99JE4	Rasgrf2	-0.0278506	-0.217823	0.162121	18.4369	-0.292572	0.770745	0.985455	0.934146	-5.84115
D3ZC84	Usp9x	-0.0545802	-0.427238	0.318078	17.7885	-0.292289	0.770961	0.985455	0.934146	-5.84123
Q64560	Tpp2	0.0391457	-0.228662	0.306953	19.2136	0.291708	0.771403	0.985455	0.934426	-5.84139
A0A0G2JVH4	Immt	-0.0221163	-0.173578	0.129345	20.5429	-0.291405	0.771633	0.985455	0.934522	-5.84147
B0BNE5	Esd	-0.0338998	-0.266259	0.198459	19.8643	-0.291155	0.771823	0.985455	0.934522	-5.84154
P43138	Apex1	-0.0940115	-0.739639	0.551616	16.767	-0.290593	0.772252	0.985455	0.934522	-5.84169
Q3B8P4	Dcps	-0.0656572	-0.51659	0.385276	17.3495	-0.290574	0.772266	0.985455	0.934522	-5.84169
Q4G079	Aimp1	0.026491	-0.156965	0.209947	17.723	0.288174	0.774095	0.985455	0.935625	-5.84234
Q157S1	Crtc1	-0.0739416	-0.587486	0.439602	17.332	-0.287584	0.774585	0.985455	0.9358	-5.84247
D3ZYH3	LOC100912928	0.064281	-0.382482	0.511044	16.8166	0.287217	0.774837	0.985455	0.9358	-5.84259
B3DMA1	Atxn2l	-0.0450295	-0.357999	0.26794	16.5239	-0.28721	0.774843	0.985455	0.9358	-5.8426
Q5FVM4	Nono	-0.0347976	-0.277749	0.208154	19.2819	-0.285836	0.775878	0.985455	0.936087	-5.84297
P36972	Aprt	0.0712622	-0.426393	0.568917	17.7061	0.28577	0.775927	0.985455	0.936087	-5.84299
P19468	Gclc	-0.0877879	-0.707111	0.531535	17.2808	-0.283293	0.777886	0.985455	0.936087	-5.8166
P16617	Pgk1	0.0132361	-0.0800644	0.106537	22.4372	0.283116	0.777953	0.985455	0.936087	-5.8437
Q6PDU7	Atp5l	-0.0684562	-0.551468	0.414556	20.5802	-0.28284	0.778163	0.985455	0.936087	-5.84377
Q66WT9	Picalm	-0.0413639	-0.33509	0.252362	19.0272	-0.281039	0.779539	0.985455	0.936863	-5.84425
Q6IRK9	Cpq	0.0860079	-0.527238	0.699254	16.6098	0.280577	0.780006	0.985455	0.936866	-5.82225
G3V6T7	Pdia4	0.0609942	-0.373182	0.495171	16.8675	0.280432	0.780015	0.985455	0.936866	-5.8329
M0R9Q1	LOC100911677	0.0439131	-0.268736	0.356563	17.1538	0.2803	0.780103	0.985455	0.936877	-5.84444
A0A0H2UHG7	Rps20	0.0447359	-0.274128	0.3636	19.5567	0.279987	0.780342	0.985455	0.936976	-5.84452
G3V8L3	Lmna	-0.0388979	-0.317773	0.239978	18.5444	-0.278357	0.781588	0.985455	0.937453	-5.84495
G3V7X5	Sparcl1	-0.0366605	-0.299841	0.22652	17.9126	-0.277992	0.781867	0.985455	0.937519	-5.84504
P08081-2	Clta	-0.0366107	-0.300725	0.227504	20.1953	-0.276632	0.782906	0.985455	0.93821	-5.8454
P50503	St13	0.0682412	-0.42511	0.561592	17.9432	0.276043	0.783356	0.985455	0.938423	-5.84555
Q9QX80	Hnrnpab	-0.0637422	-0.525777	0.398293	19.0699	-0.275321	0.783909	0.985455	0.93873	-5.84573
Q9JHY2	Sfxn3	-0.0389351	-0.323753	0.245883	19.356	-0.27281	0.785831	0.985455	0.93959	-5.84638
A0A096MJY6	Gbe1	0.0911794	-0.577504	0.759863	18.2544	0.272984	0.785841	0.985455	0.93959	-5.74208
Q9R1Z0-2	Vdac3	0.0607806	-0.38589	0.507451	19.5418	0.271559	0.786788	0.985455	0.940329	-5.8467
Q5M821	Ppm1h	-0.046648	-0.389736	0.29644	18.123	-0.27134	0.786956	0.985455	0.940373	-5.84675
P62870	Tceb2	-0.0687076	-0.576105	0.43869	17.6282	-0.27031	0.787757	0.985455	0.940977	-5.84687
P60711	Actb	-0.0336265	-0.282113	0.21486	23.1723	-0.270063	0.787934	0.985455	0.940977	-5.84708
A0A0U1RRS7	Mapk10	-0.0251214	-0.211712	0.161469	18.0599	-0.268683	0.788991	0.985455	0.941096	-5.84742
P62994	Grb2	-0.0835037	-0.705252	0.538244	17.7151	-0.268027	0.789494	0.985455	0.941096	-5.84759
F1LUY5	Ttc7b	0.0448447	-0.289079	0.378768	16.5067	0.26801	0.789508	0.985455	0.941096	-5.84759
P19139	Csnk2a1	0.0421173	-0.2716	0.355834	18.7536	0.267922	0.789574	0.985455	0.941096	-5.84762
F1LSX1	RGD1307929	0.0872529	-0.567162	0.741667	17.5985	0.267025	0.79042	0.985455	0.941495	-5.77053
M0R7U1	Ak5	-0.0238365	-0.203603	0.15593	18.82	-0.264618	0.792108	0.985455	0.94228	-5.84844
F1LPS8	Pura	0.0288825	-0.189117	0.246882	18.1457	0.264403	0.792274	0.985455	0.94228	-5.84849
Q4KM73	Cmpk1	-0.0256526	-0.219566	0.168261	18.8211	-0.264004	0.79258	0.985455	0.94228	-5.84859
Q6AXU6	Hn1	-0.059069	-0.50669	0.388552	19.7841	-0.263352	0.79308	0.985455	0.942405	-5.84875
D3ZS72	Prex1	-0.085714	-0.737581	0.566153	17.0048	-0.262962	0.793471	0.985455	0.94255	-5.84873
Q5YLM1	Dagla	-0.0564942	-0.48676	0.373772	16.5647	-0.262331	0.793913	0.985455	0.94255	-5.84897
Q5PPJ9	Sh3glb2	-0.0237042	-0.205163	0.157754	19.0944	-0.260696	0.795119	0.985455	0.942823	-5.8494
Q6BBI8	Ufc1	-0.0645289	-0.559783	0.430725	16.9804	-0.260024	0.795635	0.985455	0.942823	-5.84957
P61980	Hnrnpk	-0.0313736	-0.27224	0.209493	20.1669	-0.259941	0.795699	0.985455	0.942823	-5.84959
A0A0G2JV93	Grm3	-0.0938442	-0.814753	0.627065	17.6588	-0.259929	0.795732	0.985455	0.942823	-5.84953
Q8R2H0	Atp6v1g2	0.029346	-0.196201	0.254893	22.8091	0.259657	0.795917	0.985455	0.942823	-5.84966
F1M7L6	Scg3	0.0507133	-0.339698	0.441125	16.7385	0.259527	0.796066	0.985455	0.942823	-5.81969
Q99MI7	Uba3	0.0674329	-0.451346	0.586212	16.6925	0.259474	0.796069	0.985455	0.942823	-5.84969
D4A404	Psd3	0.0477295	-0.320408	0.415867	17.9495	0.258883	0.796535	0.985455	0.942823	-5.84983
D4A554	Eif4g3	0.0533626	-0.358304	0.46503	17.442	0.258759	0.796618	0.985455	0.942823	-5.84987
A0A0G2JSM7	Add1	0.0235523	-0.158189	0.205294	20.9992	0.258623	0.796711	0.985455	0.942823	-5.84991
D3ZET9		-0.0479019	-0.417758	0.321954	16.282	-0.258468	0.796831	0.985455	0.942823	-5.84995
Q09167	Srsf5	0.0543249	-0.367692	0.476342	17.9326	0.256895	0.79804	0.985455	0.942995	-5.85032
B0K020	Cisd1	0.023236	-0.157635	0.204107	20.3602	0.256377	0.798438	0.985455	0.942995	-5.85045
A0A0G2JVW5		0.0485519	-0.329448	0.426552	18.9333	0.256331	0.798473	0.985455	0.942995	-5.85046
M0R9X8	Dync1h1	-0.0178768	-0.157084	0.121331	20.3625	-0.25628	0.798513	0.985455	0.942995	-5.85047
F1LPB9	Rph3a	-0.0213256	-0.187636	0.144985	20.0382	-0.255899	0.798805	0.985455	0.942995	-5.85056
F1LM09	Usp7	-0.0600487	-0.528677	0.40858	17.0062	-0.255718	0.798945	0.985455	0.942995	-5.85061
A0A0G2K7J0	Acsbg1	-0.0231942	-0.205225	0.158837	18.6508	-0.254285	0.800047	0.985455	0.943183	-5.85095
Q6AY30	Sccpdh	0.0329345	-0.226734	0.292603	17.4373	0.253115	0.800947	0.985455	0.943237	-5.85123
A0A0G2K542	Ugp2	0.0414146	-0.285351	0.36818	17.963	0.252932	0.801088	0.985455	0.943237	-5.85127
Q00981	Uchl1	-0.0355137	-0.319382	0.248354	21.8825	-0.24967	0.803599	0.985455	0.943968	-5.85204
P00507	Got2	0.0203139	-0.14207	0.182698	21.3147	0.249653	0.803612	0.985455	0.943968	-5.85204
Q6P502	Cct3	0.0113224	-0.079308	0.101953	19.9653	0.249317	0.803871	0.985455	0.943968	-5.85212
Q62813	Lsamp	-0.0295438	-0.266277	0.207189	21.0927	-0.249054	0.804073	0.985455	0.943968	-5.85218
Q9WU70-3	Stxbp5	0.0397274	-0.27929	0.358745	17.3626	0.248521	0.804484	0.985455	0.943968	-5.85231
P61265	Stx1b	0.0351305	-0.247383	0.317645	20.5469	0.24816	0.804763	0.985455	0.943968	-5.85239
B1WC34	Prkcsh	-0.0257746	-0.234066	0.182517	18.2283	-0.246949	0.805696	0.985455	0.944128	-5.85267
Q8R431	Mgll	-0.0253482	-0.230735	0.180038	19.2882	-0.246299	0.806197	0.985455	0.944231	-5.85282
Q9ES21	Sacm1l	0.0299551	-0.212933	0.272843	17.6159	0.246123	0.806333	0.985455	0.944231	-5.85286
Q4AEF8	Copg1	0.0466435	-0.333616	0.426903	17.2455	0.244792	0.807358	0.985455	0.944533	-5.85317
M0RBS9	Snx27	0.0547411	-0.391686	0.501168	16.7327	0.244776	0.807382	0.985455	0.944533	-5.82015
A2RRU1	Gys1	0.0431022	-0.308905	0.395109	16.5566	0.244498	0.807608	0.985455	0.944704	-5.85322
P62630	Eef1a1	0.0384868	-0.277818	0.354792	21.6115	0.242824	0.808876	0.985455	0.945139	-5.85362
Q9EPH8	Pabpc1	-0.0403591	-0.373257	0.292539	17.4905	-0.241945	0.809555	0.985455	0.945254	-5.85382
M0R6K4	Dock4	0.0560441	-0.408559	0.520648	17.3082	0.240732	0.810491	0.985455	0.94548	-5.85409
P12839	Nefm	0.022545	-0.164682	0.209772	21.1366	0.240308	0.810818	0.985455	0.945496	-5.85419
P05426	Rpl7	0.0254682	-0.186067	0.237003	18.6301	0.240272	0.810846	0.985455	0.945496	-5.85419
P84083	Arf5	-0.0536465	-0.499357	0.392064	18.4462	-0.240201	0.810901	0.985455	0.945496	-5.85421
Q566E4	Hnrnpr	0.0424369	-0.310487	0.395361	18.2605	0.239966	0.811083	0.985455	0.945574	-5.85426
D3ZX38	Pfdn1	-0.0329986	-0.307824	0.241826	18.0837	-0.239621	0.811348	0.985455	0.945741	-5.85434
O55096	Dpp3	-0.0377954	-0.353538	0.277947	18.3464	-0.238887	0.811916	0.985455	0.946094	-5.8545
Q5RKI1	Eif4a2	0.014622	-0.108459	0.137703	20.0812	0.237083	0.813309	0.985455	0.946638	-5.85491
D3ZCI5	Stxbp6	0.0580287	-0.431792	0.54785	17.6118	0.236424	0.813818	0.985455	0.946665	-5.85505
Q5XHZ0	Trap1	-0.0353348	-0.335623	0.264954	18.1678	-0.234828	0.815051	0.985455	0.947076	-5.8554
D3ZDJ3	Elmod1	0.065142	-0.49238	0.622664	16.1022	0.233668	0.81603	0.985455	0.947771	-5.85504
P11661	Mtnd5	0.0578009	-0.441745	0.557346	18.1694	0.230912	0.81808	0.985455	0.948582	-5.85626
P61354	Rpl27	0.0741083	-0.567541	0.715758	17.8054	0.230555	0.818367	0.985455	0.948638	-5.85633
Q5M7V8	Thrap3	-0.0495383	-0.482651	0.383575	17.5811	-0.228321	0.820096	0.985455	0.949431	-5.85681
Q8CG45	Akr7a2	-0.020665	-0.201647	0.160317	18.4771	-0.227869	0.820435	0.985455	0.949651	-5.85691
Q3MIE7	Commd9	-0.0662333	-0.648611	0.516145	16.6627	-0.227684	0.820698	0.985455	0.949675	-5.78953
A0A0H2UHI7	Atad1	0.0374231	-0.291456	0.366302	17.6568	0.227086	0.821042	0.985455	0.949675	-5.85708
D4AE68	Gnaq	-0.0207367	-0.203589	0.162116	19.6882	-0.226321	0.821634	0.985455	0.949675	-5.85724
F1M1D5	Tbcd	-0.0347944	-0.34214	0.272551	16.9429	-0.225928	0.821939	0.985455	0.949675	-5.85733
P12369	Prkar2b	-0.0184081	-0.181067	0.144251	19.2915	-0.225848	0.822001	0.985455	0.949675	-5.85734
Q4V7D2	Rogdi	-0.0576355	-0.567057	0.451786	18.3973	-0.225787	0.822048	0.985455	0.949675	-5.85735
Q64232	Tecr	-0.0279155	-0.274963	0.219132	18.0492	-0.225503	0.822268	0.985455	0.949825	-5.85741
Q68A21	Purb	-0.0165832	-0.163776	0.130609	18.7758	-0.224838	0.822784	0.985455	0.950248	-5.85756
P61314	Rpl15	0.0213555	-0.168405	0.211116	18.7629	0.22459	0.822975	0.985455	0.950378	-5.85761
O35077	Gpd1	-0.0290109	-0.2872	0.229178	19.4317	-0.224238	0.823248	0.985455	0.950466	-5.85768
P17425	Hmgcs1	0.0443781	-0.352737	0.441494	17.2572	0.223206	0.824079	0.985455	0.950741	-5.85788
F1LP82	Rab2a	0.0347635	-0.277469	0.346996	20.0135	0.222194	0.824833	0.985455	0.950865	-5.85811
Q4QQT3	Celf1	0.0555016	-0.444507	0.55551	15.7891	0.221709	0.82524	0.985455	0.951243	-5.83864
Q63525	Nudc	-0.048892	-0.49	0.392216	17.5773	-0.221197	0.825605	0.985455	0.951419	-5.85832
Q4V8H5	Dnpep	-0.030397	-0.305119	0.244325	18.3978	-0.220813	0.825903	0.985455	0.951419	-5.8584
F1M7Q5	Ampd3	-0.0760957	-0.767066	0.614875	15.7773	-0.220476	0.82628	0.985455	0.951642	-5.80172
Q63584	Tmed10	0.0262024	-0.211327	0.263732	17.6638	0.220146	0.826421	0.985455	0.951684	-5.85853
F1LTE0	Tanc2	0.0559279	-0.452291	0.564146	16.2391	0.219802	0.826718	0.985455	0.951751	-5.85859
F1LRU1	Ilf3	-0.0412958	-0.416715	0.334124	17.9379	-0.219521	0.826905	0.985455	0.951875	-5.85866
Q68FX0	Idh3B	0.0131211	-0.106648	0.13289	20.9459	0.218631	0.827596	0.985455	0.952463	-5.85884
P63159	Hmgb1	0.0186129	-0.151353	0.188579	19.5013	0.218545	0.827663	0.985455	0.952463	-5.85886
Q6AZ33	Blvra	0.044539	-0.362349	0.451427	17.5767	0.21845	0.827736	0.985455	0.952463	-5.85888
F1SW39	Psip1	0.0257193	-0.21025	0.261688	18.4416	0.217516	0.828461	0.985455	0.952731	-5.85907
Q5XIF3	Ndufs4	-0.0348219	-0.354738	0.285095	19.4998	-0.217221	0.82869	0.985455	0.952731	-5.85913
P41542	Uso1	-0.0248021	-0.252705	0.203101	18.1804	-0.217182	0.82872	0.985455	0.952731	-5.85914
A0A096MKG5	Nadk2	0.083702	-0.689859	0.857263	16.8997	0.216466	0.829363	0.985455	0.952731	-5.81416
P63249	Pkia	-0.0553563	-0.567035	0.456323	17.5603	-0.216356	0.829436	0.985455	0.952731	-5.85927
B1WC26	Nans	-0.0420827	-0.432007	0.347842	17.3205	-0.215382	0.830117	0.985455	0.952731	-5.8595
Q4KMA2	Rad23b	0.104244	-0.865476	1.07396	17.0145	0.214843	0.830588	0.985455	0.952731	-5.85937
P11275	Camk2a	-0.016058	-0.165356	0.13324	23.9278	-0.214646	0.830689	0.985455	0.952731	-5.85965
P85971	Pgls	-0.112366	-1.15984	0.935103	17.6755	-0.214463	0.830894	0.985455	0.952731	-5.76189
P19527	Nefl	-0.0259422	-0.268614	0.216729	21.4355	-0.213341	0.831703	0.985455	0.953275	-5.85991
Q5XII9	Mtfr1l	-0.0329425	-0.341274	0.275389	17.667	-0.213219	0.831798	0.985455	0.953275	-5.85994
B5DF89	Cul3	-0.0162567	-0.168749	0.136236	19.1874	-0.212751	0.832161	0.985455	0.953508	-5.86003
P14669	Anxa3	-0.0214807	-0.223889	0.180928	18.3497	-0.211791	0.832907	0.985455	0.953836	-5.86022
D3ZH36	Elfn2	-0.0222438	-0.231867	0.187379	16.8616	-0.211766	0.832926	0.985455	0.953836	-5.86023
G3V6P2	Dlst	0.0214705	-0.181497	0.224438	20.6876	0.211107	0.833438	0.985455	0.953943	-5.86036
Q5VLR5	Erp44	-0.0321185	-0.336168	0.271931	18.9833	-0.210813	0.833667	0.985455	0.953943	-5.86042
P62824	Rab3c	0.0193553	-0.165521	0.204231	20.2149	0.208933	0.835128	0.985455	0.954432	-5.86079
P83868	Ptges3	0.104574	-0.904625	1.11377	18.3322	0.207092	0.836609	0.985455	0.954641	-5.80866
P63312	Tmsb10	-0.0367153	-0.391224	0.317793	20.938	-0.206684	0.836877	0.985455	0.954641	-5.86122
F1MAQ4	Trappc10	0.0307376	-0.266413	0.327888	16.1362	0.206433	0.837072	0.985455	0.954641	-5.86127
P12785	Fasn	0.0210251	-0.184522	0.226572	19.4405	0.204134	0.838862	0.985455	0.955041	-5.86171
D3ZAI6	Nt5dc3	0.0579094	-0.508767	0.624586	19.3228	0.203939	0.839013	0.985455	0.955121	-5.86175
F1M9G6	Taok1	0.0581903	-0.513705	0.630085	15.6166	0.203555	0.839394	0.985455	0.955216	-5.80965
P62963	Pfn1	0.0403549	-0.355949	0.436658	19.9446	0.203214	0.839578	0.985455	0.955216	-5.86189
A8WCF8	Tprg1l	-0.029061	-0.314956	0.256834	17.8733	-0.202857	0.839856	0.985455	0.955441	-5.86196
A0A0G2KAL9	Mff	0.0166854	-0.148389	0.181759	18.1096	0.201718	0.840743	0.985455	0.955442	-5.86217
Q4KM49	Yars	-0.03661	-0.399184	0.325964	17.3942	-0.201507	0.840907	0.985455	0.955442	-5.86221
A0A0G2KAY8	Sep15	0.0391523	-0.349559	0.427863	15.8694	0.201502	0.840992	0.985455	0.955442	-5.80191
O55173	Pdpk1	0.0277948	-0.248044	0.303633	17.7113	0.201092	0.84123	0.985455	0.955442	-5.86229
Q9QVC8	Fkbp4	-0.0414736	-0.454358	0.371411	17.2654	-0.200461	0.841722	0.985455	0.955715	-5.86241
Q641Y8	Ddx1	0.0247527	-0.221781	0.271286	16.8799	0.20037	0.841792	0.985455	0.955715	-5.86243
D4A4K4	Vps13c	-0.0461778	-0.506613	0.414257	16.8851	-0.200203	0.841932	0.985455	0.955715	-5.83411
Q5XIT1	Mapre3	-0.0380394	-0.418382	0.342303	19.0525	-0.199593	0.842398	0.985455	0.955968	-5.86257
F8WFR6	Gyg1	-0.0631921	-0.698746	0.572362	17.3549	-0.198535	0.84324	0.985455	0.956544	-5.86276
Q99J82	Ilk	0.0534659	-0.485242	0.592174	16.521	0.19812	0.843554	0.985455	0.956638	-5.86284
G3V6I5	Dnaja3	-0.0737205	-0.819657	0.672216	15.8163	-0.197713	0.843942	0.985455	0.956714	-5.86245
Q5U1W6	Apool	-0.0509711	-0.567944	0.466002	16.2078	-0.197049	0.844427	0.985455	0.956922	-5.86302
Q5XI22	Acat2	-0.0151746	-0.16957	0.139221	19.0003	-0.196142	0.845087	0.985455	0.957255	-5.86321
G3V8T4	Ddb1	0.034517	-0.317903	0.386937	16.74	0.19546	0.845619	0.985455	0.957255	-5.86334
F1M8A4	Ppfia2	0.0224478	-0.206884	0.251779	17.6026	0.195343	0.84571	0.985455	0.957255	-5.86336
P12368	Prkar2a	-0.0173816	-0.194965	0.160202	18.446	-0.195332	0.845718	0.985455	0.957255	-5.86336
P80254	Ddt	-0.0255756	-0.287587	0.236435	18.9958	-0.194802	0.846132	0.985455	0.957374	-5.86346
P35400	Grm7	-0.0612493	-0.694849	0.57235	16.0762	-0.193261	0.84739	0.985455	0.957813	-5.84447
G3V8V3	Pygm	-0.0237619	-0.269243	0.221719	19.1772	-0.193175	0.847401	0.985455	0.957813	-5.86375
Q5HZW3	Asphd2	0.0418055	-0.391053	0.474664	17.1034	0.192741	0.847739	0.985455	0.958104	-5.86383
D4ABS5	Pithd1	0.0300048	-0.280851	0.34086	17.707	0.192628	0.847828	0.985455	0.958114	-5.86385
P50408	Atp6v1f	-0.0531111	-0.604974	0.498752	18.3424	-0.192114	0.848237	0.985455	0.958135	-5.86394
A0A0G2K059	Mcu	-0.0486393	-0.554614	0.457335	18.4206	-0.191842	0.84844	0.985455	0.95817	-5.86399
Q6P6G9	Hnrnpa1	0.0317359	-0.299998	0.36347	20.3704	0.190918	0.849162	0.985455	0.958441	-5.86416
P21707	Syt1	0.0177007	-0.168857	0.204258	22.0717	0.18935	0.850385	0.985455	0.959096	-5.86444
Q8K4Y5	Lgi1	0.0186337	-0.178644	0.215912	18.5889	0.188498	0.851051	0.985455	0.959167	-5.86459
Q6PDW4	Psmb1	-0.0140397	-0.162711	0.134632	18.2685	-0.188459	0.851081	0.985455	0.959167	-5.8646
M0R8B6	Tubb1	0.0361698	-0.347979	0.420318	18.1239	0.187954	0.851484	0.985455	0.959167	-5.86446
A0A0G2JZS1	Kpna6	-0.0342899	-0.40031	0.331731	17.5139	-0.187118	0.852154	0.985455	0.959167	-5.83984
Q99MZ8	Lasp1	-0.0201517	-0.235695	0.195392	19.8403	-0.18658	0.852549	0.985455	0.959167	-5.86493
Q64303	Pak2	-0.0542645	-0.636499	0.52797	17.4852	-0.18621	0.852873	0.985455	0.959167	-5.85342
D4A3N4	Adcy1	0.0402406	-0.391961	0.472443	16.9625	0.185965	0.853055	0.985455	0.959167	-5.86502
A0A0G2K4U4	Cacnb1	0.0566126	-0.551531	0.664756	18.3191	0.185935	0.853078	0.985455	0.959167	-5.86503
P97878	Exoc5	-0.0346331	-0.406675	0.337409	17.3882	-0.185774	0.853178	0.985455	0.959167	-5.86507
B0BNJ1	Sri	-0.0499582	-0.587263	0.487347	17.9059	-0.185555	0.853349	0.985455	0.959167	-5.86511
D4A4W6	Slirp	0.0557502	-0.544717	0.656217	16.9908	0.185286	0.853559	0.985455	0.959167	-5.86515
P06685	Atp1a1	-0.0139598	-0.164663	0.136744	20.988	-0.18486	0.853892	0.985455	0.959167	-5.86523
Q71TY3	Rps27	0.031628	-0.311612	0.374868	18.2403	0.183891	0.854649	0.985455	0.959167	-5.86539
A0A0G2KAI8		0.0274142	-0.270585	0.325413	17.1292	0.18359	0.854885	0.985455	0.959167	-5.86545
G3V9P0	Psmd9	0.027418	-0.271584	0.32642	17.4441	0.182999	0.855346	0.985455	0.959167	-5.86555
A0A0G2K9J2	Atp6v1h	0.0171326	-0.169994	0.204259	20.2017	0.182715	0.855568	0.985455	0.959167	-5.8656
G3V9W6	Aldh3a2	-0.0558984	-0.667945	0.556148	16.4315	-0.182365	0.855858	0.985455	0.959167	-5.86565
P59215-2	Gnao1	-0.0856194	-1.02496	0.853719	18.2027	-0.182285	0.855967	0.985455	0.959167	-5.86533
Q1JU68	Eif3a	-0.0195023	-0.233273	0.194268	17.5306	-0.182064	0.856077	0.985455	0.959167	-5.86571
Q4KLF8	Arpc5	-0.0378645	-0.45501	0.379281	17.5566	-0.181147	0.856794	0.985621	0.959167	-5.86586
P62198	Psmc5	0.0208554	-0.209586	0.251296	17.9181	0.180611	0.857213	0.985621	0.959217	-5.86595
D3ZWV8	Tiam1	-0.0413817	-0.501347	0.418583	17.0483	-0.179749	0.85792	0.985865	0.959243	-5.86595
G3V8T9	Bax	-0.0327929	-0.399648	0.334062	17.2716	-0.178489	0.858888	0.985881	0.959297	-5.8663
D4A055-1	Cacnb4	0.0295232	-0.301817	0.360863	17.8434	0.177818	0.859397	0.985881	0.959297	-5.86642
F7EMB2	RGD1304704	0.0598279	-0.611743	0.731399	16.9449	0.177786	0.859422	0.985881	0.959297	-5.86643
D4AEI5	Myef2	0.0198975	-0.205072	0.244867	18.6706	0.176507	0.860423	0.986236	0.959297	-5.86664
Q6IMX3	Acads	-0.0413834	-0.51197	0.429203	16.183	-0.175596	0.861152	0.986236	0.959354	-5.86672
A0A0G2K8K0		0.019271	-0.200779	0.239321	19.0528	0.174772	0.861781	0.986236	0.959429	-5.86693
Q9WVK7	Hadh	-0.0510117	-0.634442	0.532419	17.2817	-0.174537	0.861973	0.986236	0.959553	-5.86696
Q6P799	Sars	-0.0153495	-0.191558	0.160859	18.4648	-0.173842	0.862509	0.986236	0.959792	-5.86708
A0A0G2JXG3	Tmem30a	0.0232975	-0.247083	0.293678	19.4268	0.171957	0.863985	0.986236	0.960471	-5.86738
M3ZCQ2	Snrnp200	0.0604685	-0.645299	0.766236	16.6222	0.171078	0.864688	0.986236	0.960597	-5.86752
D4A2F1	Agrn	0.0196939	-0.210833	0.250221	16.9523	0.17049	0.865134	0.986236	0.960597	-5.86762
P23965	Eci1	-0.0183334	-0.233748	0.197081	18.7551	-0.169846	0.865638	0.986236	0.960597	-5.86772
Q5M9H2	Acadvl	-0.0225844	-0.288227	0.243058	16.9925	-0.169667	0.865778	0.986236	0.960597	-5.86775
P24155	Thop1	-0.0185986	-0.237425	0.200228	17.9084	-0.169616	0.865818	0.986236	0.960597	-5.86776
D3ZC56	Dst	-0.0342556	-0.439244	0.370733	20.3244	-0.168801	0.866457	0.986236	0.960597	-5.86789
D3ZUP5	Brk1	-0.0129548	-0.166778	0.140869	19.1963	-0.168072	0.867028	0.986236	0.960597	-5.868
A0A0G2K261	Iars2	0.0187439	-0.204995	0.242482	19.084	0.167189	0.86772	0.986236	0.960597	-5.86814
P55161	Nckap1	0.0199107	-0.218069	0.25789	19.5834	0.166968	0.867893	0.986236	0.960597	-5.86817
M0R3K6	Fam107a	-0.0531947	-0.693733	0.587343	16.9187	-0.165779	0.868833	0.986236	0.960757	-5.86836
A0A0G2K490	Tnik	0.0251533	-0.280313	0.330619	17.8874	0.16433	0.869961	0.986236	0.960757	-5.86858
D3ZPJ0	Shisa7	-0.0782506	-1.03007	0.873569	16.8239	-0.164066	0.870168	0.986236	0.960757	-5.86862
F1LU71	Auh	-0.0200691	-0.265796	0.225658	19.278	-0.162991	0.871012	0.986236	0.960757	-5.86879
F1LRV6	Gmpr	0.048692	-0.549035	0.646419	15.4577	0.162968	0.871094	0.986236	0.960757	-5.8417
D3ZPN3	Mlf2	0.0205652	-0.231405	0.272535	18.1647	0.162881	0.871098	0.986236	0.960757	-5.86881
O35095	Ncdn	-0.0207611	-0.276907	0.235385	21.4625	-0.161752	0.871984	0.986236	0.961146	-5.86898
O08816	Wasl	-0.0315756	-0.42187	0.358719	17.2389	-0.161497	0.872191	0.986236	0.961146	-5.86901
P63039	Hspd1	0.0146384	-0.167181	0.196458	21.482	0.160672	0.87283	0.986236	0.961146	-5.86914
P35280	Rab8a	-0.02894	-0.389012	0.331132	17.1564	-0.160682	0.87287	0.986236	0.961146	-5.83737
Q4QQS3	Oscp1	-0.0546396	-0.734531	0.625252	17.2797	-0.160666	0.872882	0.986236	0.961146	-5.83166
Q66HA6	Arl8b	-0.0380498	-0.516116	0.440016	18.5246	-0.158837	0.874271	0.986236	0.961146	-5.86942
Q5RJN0	Ndufs7	0.0176817	-0.204682	0.240045	19.0949	0.15869	0.874386	0.986236	0.961146	-5.86944
P31421	Grm2	-0.0266582	-0.363198	0.309882	19.1084	-0.158081	0.874864	0.986236	0.961146	-5.86953
P49911	Anp32a	-0.0373807	-0.50973	0.434968	18.4741	-0.157932	0.874981	0.986236	0.961146	-5.86955
Q6GMN2-2	Baiap2	0.0135517	-0.157869	0.184973	19.3116	0.157767	0.875111	0.986236	0.961146	-5.86957
Q63633-2	Slc12a5	-0.0339544	-0.467639	0.399731	19.6763	-0.156246	0.876305	0.986361	0.961243	-5.8698
P08082	Cltb	0.0206446	-0.244086	0.285376	19.6175	0.155629	0.876789	0.986361	0.961598	-5.86989
P09456	Prkar1a	-0.0283739	-0.39392	0.337172	18.1029	-0.154904	0.877358	0.986361	0.961692	-5.86999
Q5RKJ9	Rab10	-0.0169402	-0.236925	0.203045	19.4143	-0.153678	0.878322	0.986361	0.962101	-5.87017
G3V7L6	Psmc2	0.018085	-0.218631	0.254801	18.1947	0.152468	0.879272	0.986361	0.962639	-5.87034
B0BN63	Ahsa1	0.0334476	-0.409777	0.476672	18.415	0.150601	0.880739	0.986361	0.963769	-5.87061
B0BNB9	Htra2	0.0390982	-0.48024	0.558436	17.1561	0.150461	0.880884	0.986361	0.963769	-5.84219
Q8K1Q0	Nmt1	0.0299858	-0.369338	0.42931	17.9116	0.149857	0.881324	0.986361	0.963842	-5.87071
Q4V8E1	Gatad2b	0.0479326	-0.592099	0.687965	17.0719	0.149583	0.881559	0.986361	0.963842	-5.79887
Q5FVJ0	Rufy3	-0.0179069	-0.25861	0.222796	18.5414	-0.148466	0.882417	0.986361	0.964047	-5.87091
B2RZ72	Arpc4	0.00978125	-0.121879	0.141442	20.736	0.14826	0.882578	0.986361	0.964134	-5.87094
Z4YNF4	Acp1	0.0409124	-0.51052	0.592345	17.6124	0.148105	0.882707	0.986361	0.964134	-5.87096
F1LRV4	Hspa4	-0.016448	-0.238305	0.205409	20.1012	-0.147954	0.882819	0.986361	0.964134	-5.87098
A0A0G2JSL0	Psmb6	0.0199838	-0.252142	0.29211	18.5603	0.146553	0.883921	0.986361	0.964256	-5.87117
D4A0X3	Btbd8	-0.0458788	-0.672474	0.580716	16.2551	-0.146121	0.884261	0.986361	0.964256	-5.87123
Q6P503	Atp6v1d	-0.0112639	-0.165182	0.142654	20.2006	-0.146045	0.88432	0.986361	0.964256	-5.87124
P63170	Dynll1	0.0490178	-0.624055	0.722091	19.1064	0.145338	0.884876	0.986361	0.964526	-5.87134
A0A0H2UHX1	Rtn3	0.057492	-0.735776	0.85076	18.3573	0.144801	0.885326	0.986361	0.964566	-5.84946
P15178	Dars	0.032213	-0.413703	0.478129	16.9685	0.144167	0.885797	0.986361	0.964804	-5.8715
D3ZWL6	Ahcyl2	-0.0200482	-0.299175	0.259079	18.5947	-0.143337	0.88645	0.986361	0.964918	-5.87161
P63326	Rps10	0.0255281	-0.333069	0.384126	19.0358	0.142069	0.887448	0.986361	0.965332	-5.87178
Q9Z0U4-2	Gabbr1	0.017973	-0.236134	0.27208	17.4706	0.141153	0.888168	0.986361	0.965445	-5.8719
Q568Z9	Phyhip	-0.0172645	-0.262657	0.228128	19.5293	-0.140403	0.888759	0.986361	0.965581	-5.872
D3ZS58	Ndufa2	0.0562343	-0.749984	0.862453	19.3365	0.139237	0.889683	0.986361	0.965881	-5.87211
Q9WV48-3	Shank1	-0.0116416	-0.178702	0.155419	18.3476	-0.139068	0.88981	0.986361	0.965931	-5.87217
Q499N5	Acsf2	-0.0180868	-0.280472	0.244298	18.646	-0.137565	0.890993	0.986361	0.966203	-5.87237
A0A0G2K0V4	Arhgef2	-0.0138149	-0.214558	0.186928	18.803	-0.137339	0.891171	0.986361	0.966203	-5.8724
D3ZUY8	Ap2a1	-0.0217044	-0.337411	0.294002	19.4645	-0.137199	0.891281	0.986361	0.966203	-5.87242
Q5XI32	Capzb	0.00972818	-0.131928	0.151385	20.1131	0.137051	0.891398	0.986361	0.966203	-5.87244
D3ZU84	Stxbp5l	-0.0393931	-0.615221	0.536435	16.8193	-0.136526	0.891811	0.986361	0.966203	-5.8725
O88917-2	Lphn1	-0.0337772	-0.529702	0.462147	18.3553	-0.135924	0.892285	0.986361	0.966203	-5.87258
G3V7G0	Dync1li1	0.016968	-0.232689	0.266625	17.4162	0.135635	0.892512	0.986361	0.966203	-5.87262
B2GV15	Dbt	0.029439	-0.404276	0.463154	17.323	0.135458	0.892652	0.986361	0.966203	-5.87264
Q75Q39	Tomm70a	0.00914125	-0.126269	0.144552	19.5991	0.134722	0.893232	0.986361	0.966391	-5.87273
P14408-2	Fh	-0.0109138	-0.174293	0.152466	20.2086	-0.13331	0.894344	0.986361	0.966425	-5.87291
D3ZAN3	Ganab	0.019515	-0.272772	0.311802	18.4986	0.133243	0.894396	0.986361	0.966425	-5.87292
A0A0G2K2B3	Khsrp	-0.0177891	-0.285541	0.249962	17.6075	-0.132589	0.894912	0.986361	0.966583	-5.873
G3V912	Tmx4	0.0335072	-0.471391	0.538405	17.321	0.132514	0.894983	0.986361	0.966583	-5.87278
B1H2A2	Fsd1	0.0389636	-0.554918	0.632845	17.2832	0.131123	0.896099	0.986361	0.9673	-5.8511
G3V6W6	Psmc6	-0.010858	-0.178806	0.15709	17.7908	-0.129021	0.897724	0.986361	0.967863	-5.87344
G3V8L9	Ptrf	-0.0597511	-0.986546	0.867043	15.869	-0.12889	0.897864	0.986361	0.967863	-5.79444
Q4KM74	Sec22b	-0.0151944	-0.252432	0.222043	18.663	-0.127816	0.898673	0.986361	0.968147	-5.87358
P02688-3	Mbp	-0.0595587	-0.996834	0.877716	21.1686	-0.126884	0.89942	0.986361	0.968259	-5.86258
G3V9P7	Htt	0.0265831	-0.391917	0.445084	16.5416	0.126764	0.899503	0.986361	0.968259	-5.87371
A0A0G2JSV0	Ndrg2	-0.0139052	-0.233074	0.205264	21.1432	-0.126615	0.899621	0.986361	0.968298	-5.87372
Q5U2X6	Ccdc47	0.0302195	-0.449122	0.50956	16.2969	0.125814	0.900252	0.986361	0.968461	-5.87382
Q4QQV8	Chmp5	-0.0366915	-0.623082	0.549699	17.9346	-0.124941	0.900952	0.986361	0.968596	-5.87392
A0A0G2JSJ3	Slc2a3	0.0140731	-0.211538	0.239684	19.4265	0.124485	0.901301	0.986361	0.968711	-5.87398
A0A0H2UHS7	Rpl18	0.0190756	-0.288539	0.32669	18.8618	0.123753	0.901878	0.986361	0.968766	-5.87406
A0A0G2JXP3	Nedd4l	0.0191323	-0.290386	0.32865	17.834	0.123358	0.90219	0.986361	0.968823	-5.87411
Q499Q4	Pgm1	-0.0192197	-0.331855	0.293416	19.6544	-0.122686	0.90272	0.986361	0.969097	-5.87418
B2RYI2	Srp68	0.0170029	-0.260422	0.294428	16.7296	0.122311	0.903016	0.986361	0.969192	-5.87423
E9PSK7	Mapk8ip3	-0.0117469	-0.203507	0.180013	17.7757	-0.12225	0.903063	0.986361	0.969192	-5.87423
O89049	Txnrd1	-0.0276971	-0.480781	0.425387	16.2359	-0.121995	0.903265	0.986361	0.969192	-5.87426
Q63570	Psmc4	0.0113728	-0.175045	0.197791	17.7221	0.12175	0.903458	0.986361	0.969192	-5.87429
A0A0G2K350	Napg	0.0124417	-0.192283	0.217166	20.1041	0.121282	0.903827	0.986361	0.969354	-5.87434
F1MAH8	Clip1	0.0228924	-0.354666	0.400451	16.6509	0.121003	0.904048	0.986361	0.969354	-5.87438
D3ZBN0	Hist1h1b	0.0361738	-0.561665	0.634013	18.1633	0.120753	0.904245	0.986361	0.969354	-5.8744
Q6DGF2	Clint1	0.0184353	-0.288934	0.325805	20.4017	0.119695	0.90508	0.986361	0.969758	-5.87452
Q5MJ12	Fbxl16	0.0299209	-0.474918	0.534759	17.1952	0.118279	0.906197	0.986361	0.970445	-5.87468
P19804	Nme2	-0.0155872	-0.281967	0.250792	21.903	-0.116776	0.907384	0.986361	0.970976	-5.87485
Q4KLH4	Pspc1	-0.0183075	-0.332852	0.296237	17.4488	-0.116154	0.907875	0.986361	0.971048	-5.87491
F1LPD6	Acaa1b	0.0206089	-0.336726	0.377943	17.6523	0.115161	0.908669	0.986361	0.971222	-5.87502
P05765	Rps21	-0.0212718	-0.392375	0.349832	19.6014	-0.114423	0.909246	0.986361	0.971523	-5.8751
B2RYW3	Ndufb9	0.0143537	-0.240723	0.26943	19.1982	0.1123	0.910918	0.986361	0.971885	-5.87533
P32736-2	Opcml	0.0129048	-0.217953	0.243762	19.991	0.111556	0.911506	0.986361	0.971885	-5.8754
A9UMV9	Ndufa7l	0.020677	-0.349314	0.390668	18.972	0.111528	0.911528	0.986361	0.971885	-5.87541
Q5D023	Dync1li2	0.0106477	-0.181269	0.202565	17.5022	0.110721	0.912166	0.986361	0.972226	-5.87549
P21670	Psma4	-0.0339279	-0.648652	0.580796	17.2501	-0.110238	0.912562	0.986361	0.972226	-5.87554
Q641Y0	Ddost	0.0190666	-0.328013	0.366146	17.1903	0.10979	0.912927	0.986361	0.97223	-5.85356
B2GUZ5	Capza1	-0.016338	-0.313513	0.280837	18.348	-0.109717	0.912959	0.986361	0.97223	-5.8756
F1LMV9	Coro2b	0.00791224	-0.136417	0.152241	18.9038	0.109404	0.913206	0.986361	0.97223	-5.87563
Q9WUD9	Src	-0.0439487	-0.849507	0.761609	17.6179	-0.109002	0.913544	0.986361	0.97223	-5.87566
P20171	Hras	0.00807839	-0.140537	0.156694	18.6953	0.108479	0.913937	0.986361	0.972327	-5.87572
A0A0G2JZH8	Pdhx	-0.0108186	-0.213177	0.19154	19.6119	-0.106693	0.915349	0.986361	0.972735	-5.8759
Q2PQA9	Kif5b	-0.0149618	-0.296547	0.266623	17.2326	-0.106038	0.915866	0.986361	0.97304	-5.87597
D3ZD09	Cox6b1	-0.0132199	-0.26386	0.23742	22.1946	-0.10526	0.916481	0.986361	0.973371	-5.87604
Q5RKG9	Eif4b	0.0239774	-0.436257	0.484212	17.2365	0.104028	0.917464	0.986361	0.973847	-5.87616
Q4FZT0	Stoml2	0.0158796	-0.289157	0.320916	17.8514	0.10389	0.917564	0.986361	0.973847	-5.87618
Q6AYK6	Cacybp	0.0141356	-0.257545	0.285816	18.1445	0.103834	0.917608	0.986361	0.973847	-5.87618
P23978	Slc6a1	0.0187901	-0.344569	0.382149	20.7171	0.1032	0.91811	0.986361	0.973961	-5.87625
Q80Z29	Nampt	-0.020411	-0.416585	0.375763	17.0529	-0.102874	0.918377	0.986361	0.974143	-5.87628
Q2I6B2	Atp6v0a1	-0.00647622	-0.132684	0.119732	21.2135	-0.102405	0.918738	0.986361	0.974143	-5.87632
G3V624	Coro1c	0.00624696	-0.115797	0.128291	19.5663	0.10215	0.91894	0.986361	0.974143	-5.87635
P13234	Camk4	0.0291146	-0.541336	0.599565	16.9919	0.101882	0.919156	0.986361	0.974143	-5.87637
A0A0H2UHF9	Ablim2	-0.0209913	-0.435571	0.393589	16.7283	-0.101046	0.919813	0.986361	0.974143	-5.87645
Q3MIE4	Vat1	-0.0140403	-0.292187	0.264106	18.093	-0.100737	0.920057	0.986361	0.974143	-5.87648
Q5MPA9-3	Dclk2	0.0157608	-0.296834	0.328356	17.0271	0.100619	0.92015	0.986361	0.974143	-5.87649
Q9EQX9	Ube2n	0.0325947	-0.615292	0.680481	18.1007	0.1004	0.920324	0.986361	0.974143	-5.87651
A0A0G2K1C0	Actr3	-0.00970435	-0.204258	0.184849	22.1521	-0.0995439	0.921001	0.986361	0.974234	-5.87659
P56571		0.00944987	-0.180151	0.19905	20.2189	0.0994656	0.921063	0.986361	0.974234	-5.8766
P13676	Apeh	0.0127967	-0.248446	0.27404	17.3977	0.0977549	0.922416	0.986361	0.975087	-5.87676
B0BMY7	Twf2	0.0181355	-0.353281	0.389552	17.6748	0.0974439	0.922662	0.986361	0.975087	-5.87679
M0RAD5	Clpp	-0.0214207	-0.460603	0.417761	17.9746	-0.097419	0.922695	0.986361	0.975087	-5.84338
Q6P9V9	Tuba1b	0.00653493	-0.127485	0.140555	24.5778	0.09731	0.922768	0.986361	0.975087	-5.8768
P02688	Mbp	-0.0291383	-0.627377	0.5691	24.343	-0.0972022	0.922853	0.986361	0.97509	-5.87681
F1M6T6	Ppp6r2	-0.0243527	-0.528538	0.479833	16.7843	-0.096474	0.923443	0.986403	0.975108	-5.84132
D3ZD73	Ddx6	0.0165841	-0.329944	0.363113	17.4912	0.095534	0.924177	0.986403	0.975456	-5.87696
A0A0G2JUT1	Cadm1	-0.00827079	-0.182509	0.165967	19.1976	-0.0947305	0.924809	0.986403	0.975946	-5.87703
Q99PD4	Arpc1a	-0.00824343	-0.182935	0.166448	20.9671	-0.0941723	0.925251	0.986403	0.97611	-5.87708
P07632	Sod1	0.00994067	-0.201064	0.220945	21.4822	0.0940179	0.925373	0.986403	0.97611	-5.87709
B2GV73	Arpc3	-0.0123992	-0.27851	0.253711	20.7827	-0.0929864	0.926189	0.986744	0.976724	-5.87718
A0A1W2Q6E9	Msn	0.0392582	-0.818744	0.897261	16.154	0.0915044	0.927393	0.987167	0.977031	-5.82532
A0A0G2K1S6	Me1	-0.00902416	-0.206428	0.188379	18.5857	-0.0912302	0.927579	0.987167	0.977055	-5.87734
P43278	H1f0	-0.0182279	-0.433959	0.397503	18.2192	-0.0875005	0.930532	0.989447	0.978174	-5.87765
Q6Q0N1	Cndp2	0.00860929	-0.18887	0.206088	18.7641	0.0870028	0.930926	0.989447	0.978174	-5.87769
O70593	Sgta	-0.0240288	-0.582048	0.533991	18.2752	-0.0859585	0.931757	0.989447	0.978228	-5.87746
O35180	Sh3gl3	0.0226155	-0.506641	0.551872	17.8888	0.0853482	0.932248	0.989447	0.978258	-5.87776
P04785	P4hb	-0.0301738	-0.751739	0.691391	17.5191	-0.0834757	0.933724	0.989447	0.978739	-5.87797
F1LPG5	LOC688963	0.00527326	-0.123672	0.134219	19.7459	0.0816132	0.935195	0.989447	0.979606	-5.87812
P37377	Snca	0.00986819	-0.231667	0.251403	22.1572	0.0815349	0.935257	0.989447	0.979606	-5.87812
F1M3W5	Dmxl2	-0.00482378	-0.123738	0.11409	19.8707	-0.0809544	0.935717	0.989447	0.97963	-5.87817
Q62703	Rcn2	-0.0180331	-0.463142	0.427076	17.6946	-0.080874	0.935785	0.989447	0.97963	-5.87817
D3ZGS3	Ocrl	-0.0277451	-0.714815	0.659325	16.9549	-0.0808743	0.935827	0.989447	0.97963	-5.8058
B1WC61	Acad9	0.00655481	-0.155702	0.168811	17.9108	0.0806204	0.935982	0.989447	0.979676	-5.87819
Q99ML5	Pcyox1	-0.0148174	-0.387566	0.357931	18.3264	-0.0793308	0.937004	0.989447	0.979807	-5.87829
P49803	Rgs7	-0.0140787	-0.369506	0.341349	17.6753	-0.0790493	0.937227	0.989447	0.979807	-5.87831
P41562	Idh1	0.00786844	-0.191883	0.20762	18.5109	0.0786112	0.937574	0.989447	0.979807	-5.87834
D3ZZ21	Ndufb6	-0.0206365	-0.549904	0.508631	19.4721	-0.077812	0.938207	0.989447	0.979807	-5.8784
D3ZDU5	Pfn2	-0.0326653	-0.872138	0.806807	17.5225	-0.0777201	0.938291	0.989447	0.979807	-5.8784
F1LQL1	Nos1	-0.0203366	-0.549586	0.508913	16.3068	-0.0767719	0.939046	0.989447	0.979973	-5.85342
G3V914	Gria2	0.00927042	-0.233456	0.251997	18.9738	0.0762199	0.939469	0.989447	0.980022	-5.87851
X1WI37	LOC100362640	-0.00819037	-0.223502	0.207121	18.9184	-0.0759142	0.939711	0.989447	0.980022	-5.87854
Q5U328	Ncl	0.0147794	-0.37568	0.405238	17.7692	0.0755382	0.940009	0.989447	0.980022	-5.87856
P11884	Aldh2	-0.0105266	-0.289396	0.268342	19.8615	-0.0753309	0.940174	0.989447	0.980022	-5.87858
D4A4M0	Shisa6	-0.0115895	-0.334826	0.311647	18.3682	-0.0715535	0.943168	0.992073	0.981771	-5.87884
P63055	Pcp4	0.0133682	-0.368569	0.395306	18.6417	0.0698502	0.944519	0.992532	0.982345	-5.87895
A0A0G2K0S1	Calcoco1	0.0193069	-0.533255	0.571869	17.8435	0.0697488	0.944602	0.992532	0.982345	-5.87896
P38718	Mpc2	-0.0343374	-1.05641	0.987738	17.7894	-0.067064	0.946732	0.994243	0.983941	-5.87913
B0BMW2	Hsd17b10	-0.0101339	-0.315501	0.295233	19.2081	-0.0662281	0.947392	0.994399	0.983941	-5.87918
G3V6U3	Alg2	-0.00787327	-0.249067	0.23332	18.5059	-0.0651442	0.948251	0.994399	0.984297	-5.87925
D4ABK7	Hnrnph3	0.00838542	-0.251469	0.26824	16.7832	0.0644351	0.94882	0.994399	0.984407	-5.87929
Q6NYB7	Rab1A	-0.00517949	-0.166356	0.155997	20.7938	-0.0641317	0.949055	0.994399	0.984407	-5.87931
F1M5N4	Me3	0.0123274	-0.373758	0.398413	19.6266	0.0637198	0.949381	0.994399	0.984407	-5.87933
P62914	Rpl11	-0.0109975	-0.365697	0.343702	19.0849	-0.0618759	0.950844	0.995067	0.984862	-5.87944
Q5M7T6	Atp6v0d1	-0.00877197	-0.292706	0.275162	20.5109	-0.0616547	0.95102	0.995067	0.984958	-5.87946
Q9QYL8	Lypla2	0.0132639	-0.422471	0.448999	18.1198	0.0607483	0.951739	0.995261	0.985222	-5.87951
Q794E4	Hnrnpf	0.021536	-0.69466	0.737732	17.6746	0.0600096	0.952325	0.995261	0.985454	-5.87955
B0BN94	Fam136a	0.019676	-0.640404	0.679756	17.2476	0.0595381	0.952707	0.995261	0.985711	-5.86591
P62632	Eef1a2	0.00407118	-0.134712	0.142855	21.5888	0.0585422	0.953489	0.99545	0.985762	-5.87963
P11348	Qdpr	-0.00628826	-0.222514	0.209938	19.7991	-0.0580376	0.95389	0.99545	0.985812	-5.87966
D3ZBU7	RGD1310819	0.00605092	-0.204657	0.216758	18.7067	0.0573097	0.954467	0.995531	0.985812	-5.8797
Q7TQ70	Fga	0.0229658	-0.827843	0.873775	15.9215	0.0539141	0.95717	0.997826	0.987043	-5.87984
A0A0G2JZD1		-0.00946724	-0.384506	0.365571	18.4947	-0.0503772	0.95997	0.998614	0.988369	-5.88005
F1M6V8	Strn4	0.00450056	-0.17905	0.188051	18.0781	0.0489325	0.961117	0.998614	0.988805	-5.88011
Q80U96	Xpo1	-0.0130946	-0.567031	0.540842	17.4702	-0.0471759	0.962512	0.998614	0.989804	-5.88019
Q9ER24	Atxn10	-0.00748572	-0.324775	0.309804	17.6251	-0.047083	0.962586	0.998614	0.989804	-5.8802
D4A4Z9	Ktn1	-0.00903812	-0.407346	0.38927	17.8086	-0.0452841	0.964014	0.998614	0.990621	-5.88028
Q642E2	LOC100362069	0.00902	-0.389451	0.407491	18.6391	0.0451748	0.964101	0.998614	0.990621	-5.88028
P59215	Gnao1	-0.00350349	-0.159186	0.152179	22.7578	-0.0449104	0.964311	0.998614	0.990621	-5.88029
Q80W98	Sgtb	-0.00823563	-0.3762	0.359728	17.3891	-0.0446783	0.964497	0.998614	0.990621	-5.88008
Q63616	Vps33b	0.0131062	-0.576261	0.602474	17.6136	0.0444165	0.964709	0.998614	0.990621	-5.88031
Q5U316	Rab35	-0.00296565	-0.138257	0.132326	18.7521	-0.0437457	0.965236	0.998614	0.990821	-5.88034
A0A0H2UHD9	Ncln	-0.00893392	-0.421083	0.403215	16.2035	-0.0432706	0.965615	0.998614	0.990832	-5.88036
Q6P9U0	Serpinb6	-0.0106309	-0.501633	0.480371	16.9473	-0.0432089	0.965662	0.998614	0.990832	-5.88036
P06302	Ptma	-0.00963388	-0.469814	0.450547	18.5965	-0.0417791	0.966798	0.998614	0.991059	-5.88042
G3V7Q6	Psmb5	0.00809258	-0.383728	0.399913	18.1192	0.0412179	0.967244	0.998614	0.991088	-5.88044
A0A0G2K1D2		-0.00685573	-0.344644	0.330933	17.8876	-0.0405038	0.967811	0.998614	0.991211	-5.88047
F1M403	Ube2o	-0.00360124	-0.184648	0.177445	17.7654	-0.0396962	0.968452	0.998614	0.991558	-5.8805
P63329	Ppp3ca	-0.00282744	-0.146572	0.140917	21.559	-0.0392545	0.968803	0.998614	0.991666	-5.88051
Q02563	Sv2a	-0.00426484	-0.224874	0.216344	21.6677	-0.0385804	0.969339	0.998614	0.991959	-5.88054
D3ZLL8	LOC691716	-0.00979593	-0.522154	0.502562	17.3934	-0.0381557	0.969676	0.998614	0.992049	-5.88055
P50554	Abat	0.00422953	-0.21993	0.228389	20.0618	0.0376549	0.970074	0.998614	0.992223	-5.88057
Q66X93	Snd1	-0.00353391	-0.193614	0.186546	18.4738	-0.0371028	0.970512	0.998614	0.992394	-5.88059
B5DFI9	Pdk3	-0.00478342	-0.26821	0.258644	17.7657	-0.0362381	0.971199	0.998614	0.992681	-5.88062
B4F7A9	Csnk2a2	0.00744256	-0.40932	0.424205	17.6278	0.0356385	0.971676	0.998614	0.992902	-5.88064
D4AA63	Ubqln2	0.00408705	-0.231636	0.239811	18.2909	0.0346014	0.9725	0.998614	0.993404	-5.88068
D4A5X7	Gdap1	-0.00442602	-0.268396	0.259544	19.6333	-0.0334614	0.973405	0.998614	0.993648	-5.88071
P62483	Kcnab2	0.00518561	-0.317689	0.32806	19.4023	0.0320518	0.974525	0.998614	0.994183	-5.88076
P38062	Metap2	0.00515265	-0.322537	0.332842	16.5513	0.0313802	0.975059	0.998614	0.994183	-5.88078
P07895	Sod2	0.00784146	-0.491539	0.507222	20.1765	0.0313366	0.975093	0.998614	0.994183	-5.88078
P05371	Clu	-0.00306223	-0.198874	0.192749	18.4241	-0.0312095	0.975194	0.998614	0.994183	-5.88078
Q9ERH3	Wdr7	0.0027127	-0.17394	0.179365	18.9775	0.0306456	0.975642	0.998614	0.994183	-5.8808
D3ZXF9	Mrpl12	-0.0100625	-0.668868	0.648743	15.2703	-0.0305258	0.975745	0.998614	0.994183	-5.85554
D4A644	Map7d1	0.00346049	-0.226871	0.233792	18.3057	0.0299828	0.976169	0.998614	0.994183	-5.88082
P84079	Arf1	-0.00911368	-0.629941	0.611714	20.9648	-0.0292961	0.976715	0.998614	0.994473	-5.88083
D4AC23	Cct7	0.00211609	-0.148784	0.153016	18.5978	0.0279854	0.977756	0.998614	0.995024	-5.88087
D4A4F9	LOC682489	-0.0077969	-0.606371	0.590777	19.0769	-0.0261081	0.979266	0.998614	0.995046	-5.8206
Q5XI73	Arhgdia	0.00155672	-0.11776	0.120873	21.7748	0.0260373	0.979304	0.998614	0.995046	-5.88092
Q4V7C6	Gmps	0.00761012	-0.57812	0.59334	17.627	0.0259358	0.979386	0.998614	0.995046	-5.88091
P81795	Eif2s3	-0.00810173	-0.64226	0.626057	17.7664	-0.0254957	0.979735	0.998614	0.995074	-5.88093
P68370	Tuba1a	0.00542327	-0.425273	0.43612	22.7975	0.0251291	0.980026	0.998614	0.9951	-5.88094
P63029	Tpt1	-0.00509535	-0.421188	0.410997	18.8932	-0.0244383	0.980575	0.998614	0.995442	-5.88096
B0BNJ4	Ethe1	0.00386036	-0.313003	0.320724	17.0702	0.0243199	0.98067	0.998614	0.995442	-5.85898
P04550	Ptms	0.00541179	-0.46923	0.480053	19.3663	0.0227542	0.981913	0.998614	0.99611	-5.88099
Q5U1Z2	Trappc3	0.0111077	-1.00615	1.02836	16.7845	0.0218601	0.982635	0.998614	0.996435	-5.81276
Q66HF1	Ndufs1	-0.0013384	-0.125203	0.122526	20.9109	-0.0215637	0.982859	0.998614	0.996452	-5.88102
D3ZES7	Plxna4a	0.00195702	-0.181587	0.185501	18.3393	0.0212786	0.983086	0.998614	0.996452	-5.88102
G3V784	Adpgk	0.00631373	-0.677957	0.690585	16.7405	0.0184349	0.98535	0.998614	0.997569	-5.88068
A0A0G2JSZ5	Pdia6	-0.00166896	-0.182492	0.179154	18.765	-0.0184196	0.985358	0.998614	0.997569	-5.88108
O35547-2	Acsl4	-0.00215848	-0.248304	0.243987	17.1816	-0.0175002	0.986089	0.998614	0.997716	-5.88109
P23565	Ina	-0.00184421	-0.226632	0.222944	21.8976	-0.0163728	0.986985	0.998614	0.997941	-5.88111
P01830	Thy1	0.00136238	-0.165715	0.16844	21.9056	0.0162729	0.987065	0.998614	0.997941	-5.88111
Q63041	A1m	0.00664952	-0.855914	0.869213	17.0809	0.0154333	0.98774	0.998614	0.998204	-5.85944
Q9WVB1	Rab6a	0.00217261	-0.303174	0.307519	19.1653	0.0141996	0.988713	0.998614	0.998204	-5.88114
Q66H61	RGD1562301	-0.00345552	-0.491602	0.484691	16.6727	-0.0141349	0.988765	0.998614	0.998204	-5.88083
A0A0G2QC17	Pdp1	0.0033796	-0.475254	0.482013	16.9209	0.0140951	0.988796	0.998614	0.998204	-5.88114
B5DFE0	Mpp6	0.00305831	-0.431036	0.437152	17.4659	0.01406	0.988824	0.998614	0.998204	-5.88114
P70580	Pgrmc1	-0.000962969	-0.139879	0.137953	19.9902	-0.013834	0.989003	0.998614	0.998209	-5.88115
F1M953	Hspa9	0.00106002	-0.165152	0.167272	20.8375	0.0127274	0.989883	0.998614	0.998337	-5.88116
B0BN18	Pfdn2	-0.0021098	-0.335934	0.331715	17.6499	-0.0126128	0.989974	0.998614	0.998337	-5.88116
G3V803	Cdh2	0.00231181	-0.373513	0.378137	18.096	0.0122759	0.990242	0.998614	0.998337	-5.88117
P63174	Rpl38	-0.00135108	-0.221844	0.219142	19.7521	-0.0122285	0.990279	0.998614	0.998337	-5.88117
P61972	Nutf2	0.00537095	-0.88483	0.895572	17.821	0.0120508	0.990422	0.998614	0.998337	-5.85918
Q63396	Sub1	0.00283302	-0.481683	0.487349	17.3576	0.011672	0.990722	0.998614	0.998337	-5.88113
B2RZC6	Ilf2	0.00275207	-0.47322	0.478724	18.1518	0.0115421	0.990825	0.998614	0.998337	-5.88117
P54645	Prkaa1	0.00324319	-0.571132	0.577619	17.2029	0.0112684	0.991042	0.998614	0.998337	-5.88118
Q642B0	Gpc4	0.00237722	-0.422365	0.427119	17.6508	0.0111694	0.991121	0.998614	0.998337	-5.88118
P11232	Txn	0.0022807	-0.414003	0.418564	20.2998	0.0109367	0.991307	0.998614	0.998337	-5.88118
A0A0G2K3C1	Cdc37	-0.00072473	-0.139531	0.138082	20.6267	-0.0104196	0.991717	0.998614	0.998413	-5.88119
O88321	Psmd4	0.00104453	-0.214028	0.216117	18.4414	0.0096922	0.992295	0.998614	0.998445	-5.88119
Q5I0G4	Gars	0.00133806	-0.28496	0.287637	17.8782	0.00932701	0.992586	0.998614	0.998445	-5.8812
A0A0G2K104	Kcnma1	-0.00166563	-0.467159	0.463828	16.3708	-0.00714691	0.99432	0.998742	0.999178	-5.88121
Q9QXQ0	Actn4	-0.00186575	-0.536085	0.532354	19.0159	-0.00696981	0.994459	0.998742	0.999234	-5.88121
A0A0G2K038	Rexo2	-0.00144858	-0.442303	0.439406	17.3743	-0.00656493	0.994783	0.998742	0.999274	-5.85548
Q6MFY6	Ppp1r11	-0.000802143	-0.251522	0.249917	16.9909	-0.00638485	0.994924	0.998742	0.999274	-5.88122
Q71SY3	Tsn	0.00140438	-0.465387	0.468196	16.6286	0.00600743	0.995225	0.998742	0.999363	-5.88122
G3V7K3	Cp	-0.00296997	-1.1359	1.12996	16.024	-0.00525438	0.995827	0.998841	0.999529	-5.79583
A0A0G2K7P9	Ncam2	0.000450767	-0.219051	0.219953	17.0939	0.00409827	0.996742	0.999255	0.999615	-5.88123
Q5XIH7	Phb2	0.000197139	-0.20642	0.206815	20.0721	0.00190411	0.998486	0.999705	0.999827	-5.88123
O88989	Mdh1	-0.000225528	-0.294503	0.294052	23.2914	-0.00152943	0.998784	0.999705	0.999869	-5.88124
Q6PCU2	Atp6v1e1	6.01366e-05	-0.117069	0.11719	21.6073	0.00102461	0.999185	0.999705	0.999869	-5.88124
D4A8H3	Uba6	0.000180235	-0.644601	0.644962	16.0945	0.000559406	0.999556	0.999705	0.999869	-5.86757
Q5U300	Uba1	1.85381e-05	-0.0996101	0.0996472	21.2246	0.000371336	0.999705	0.999705	0.999869	-5.88124

## Sheet: sheet_5
protein_ids	gene_symbol	log_fc	ci_l	ci_r	ave_expr	t	p_value	adj_p_val	global_adj_p_val	b
P20156	Vgf	0.775197	0.517427	1.03297	17.7822	6.00159	8.57763e-08	0.000170523	0.000341047	7.49308
D3Z9H2	Hapln4	0.506351	0.317101	0.6956	19.476	5.33954	1.17352e-06	0.00116648	0.00150637	5.1629
Q66HA8	Hsph1	0.274261	0.163463	0.385059	19.4464	4.9399	5.40761e-06	0.00358344	0.00358344	3.80207
Q9EPH8	Pabpc1	-0.797483	-1.13486	-0.460103	17.4905	-4.71725	1.24076e-05	0.0061666	0.00557145	3.06314
Q6URK4-2	Hnrnpa3	-0.882949	-1.2637	-0.502196	20.8869	-4.62785	1.72386e-05	0.00685408	0.0064257	2.77082
M0RC17	Chl1	-0.522657	-0.765824	-0.27949	16.8668	-4.28942	5.83031e-05	0.0193178	0.0154542	1.68953
A0A096MIZ1	Palm2	0.393302	0.19541	0.591194	18.499	3.96629	0.000178807	0.0416241	0.0315248	0.698847
F1LM19	Ahsg	-0.682328	-1.02921	-0.335448	18.2328	-3.92555	0.000205275	0.0416241	0.0354858	0.577147
P31424	Grm5	-0.752339	-1.13846	-0.366215	17.6039	-3.88842	0.000232646	0.0416241	0.0396428	0.466876
F1LMS1	Cacna1e	0.611328	0.295781	0.926876	16.9862	3.86631	0.000250573	0.0416241	0.0415116	0.401512
Q02356	Ampd2	0.416832	0.200984	0.63268	19.619	3.85389	0.00026122	0.0416241	0.0416241	0.364883
D3ZCI5	Stxbp6	0.95584	0.459425	1.45226	17.6118	3.84261	0.000271256	0.0416241	0.0416241	0.331704
B5DFD8	Sh3bgrl	-2.18794	-3.32328	-1.0526	16.285	-3.84802	0.00027219	0.0416241	0.0416241	0.331001
G3V7S0	Folh1	-1.2515	-1.91808	-0.584922	17.0985	-3.74685	0.000372721	0.0500564	0.0505207	0.0523462
P0DMW1	Hspa1a	0.709906	0.329301	1.09051	17.1599	3.72231	0.000404056	0.0500564	0.0529624	-0.0185312
D3ZLC1	Lmnb2	-0.653787	-1.00845	-0.299124	16.5979	-3.67881	0.000465881	0.0500564	0.0567044	-0.143454
P15999	Atp5a1	0.262674	0.119133	0.406214	22.9406	3.65199	0.000508393	0.0500564	0.058294	-0.220012
Q1RP74	LOC100911774	-1.36245	-2.10698	-0.617916	16.8034	-3.65502	0.000517499	0.0500564	0.058294	-0.231632
Q4KMA2	Rad23b	-1.79763	-2.79414	-0.801124	17.0145	-3.60527	0.000618763	0.0500564	0.0656859	-0.384027
A0A096MJE6	Tnr	-0.387257	-0.603001	-0.171514	20.2933	-3.5822	0.000637013	0.0500564	0.0666516	-0.417517
Q5M9H7	Dnaja2	-0.880863	-1.37359	-0.388139	17.6201	-3.56772	0.000667307	0.0500564	0.0686176	-0.458163
F1LMY3	Ptprz1	-0.285429	-0.446091	-0.124768	19.1701	-3.54547	0.000716578	0.0500564	0.0705184	-0.520453
Q6P6G9	Hnrnpa1	-0.596451	-0.932651	-0.26025	20.3704	-3.54048	0.000728074	0.0500564	0.0706055	-0.534366
P11030	Dbi	-1.01258	-1.58433	-0.440838	20.6101	-3.53439	0.000742361	0.0500564	0.070839	-0.551349
P63039	Hspd1	0.325888	0.141621	0.510155	21.482	3.52945	0.000754155	0.0500564	0.0713934	-0.565124
A0A0G2K151	Apoe	-0.445196	-0.698231	-0.19216	20.4052	-3.51121	0.000799224	0.0500564	0.0730603	-0.615831
Q9JJ54-3	Hnrnpd	-1.26793	-1.9898	-0.546063	18.8538	-3.5053	0.000814366	0.0500564	0.0730603	-0.632222
F1LNF1	Hnrnpa2b1	-0.367745	-0.577119	-0.158372	21.7358	-3.50519	0.00081464	0.0500564	0.0730603	-0.632515
Q920Q0	Palm	-0.436543	-0.685938	-0.187147	20.3271	-3.49321	0.00084618	0.0500564	0.0734885	-0.66568
P02091	Hbb	-0.918678	-1.44364	-0.393715	23.8153	-3.49238	0.000848425	0.0500564	0.0734885	-0.667993
F1LSC8	Rimbp2	0.545387	0.233366	0.857408	18.579	3.48825	0.000859582	0.0500564	0.0734885	-0.679397
B5DF65	Blvrb	-0.41009	-0.645012	-0.175168	18.6663	-3.48371	0.00087201	0.0500564	0.0737684	-0.691927
P14046	A1i3	-0.850261	-1.33784	-0.362687	18.6287	-3.48015	0.000881892	0.0500564	0.074079	-0.701761
P62628	Dynlrb1	-0.522497	-0.823054	-0.221939	19.4893	-3.46931	0.00091261	0.0500564	0.0750796	-0.731635
D3ZUP5	Brk1	0.270375	0.114481	0.42627	19.1963	3.46117	0.000936329	0.0500564	0.0757692	-0.754017
P62243	Rps8	0.688405	0.291077	1.08573	19.1191	3.45765	0.000946762	0.0500564	0.0757692	-0.763681
Q62658	Fkbp1a	-0.724955	-1.14362	-0.306286	20.6746	-3.45562	0.000952832	0.0500564	0.0757692	-0.769255
P17078	Rpl35	0.535273	0.225686	0.844859	18.1544	3.45048	0.000968384	0.0500564	0.0764959	-0.783372
Q6P136	Hyou1	0.385782	0.162207	0.609358	18.9761	3.44354	0.000989751	0.0500564	0.0771617	-0.8024
Q9Z1E1	Flot1	-0.399084	-0.630742	-0.167426	18.3498	-3.43798	0.00100717	0.0500564	0.0771803	-0.81761
P21531	Rpl3	0.358195	0.148561	0.567829	19.1795	3.40992	0.00109968	0.0525316	0.0817158	-0.894173
Q6MGC4	Pfdn6	0.776501	0.32184	1.23116	17.099	3.40926	0.00110982	0.0525316	0.0817158	-0.90094
D3ZWV8	Tiam1	0.812004	0.33406	1.28995	17.0483	3.39442	0.0011884	0.0545454	0.0838771	-0.952149
P56571		0.325353	0.1332	0.517506	20.2189	3.37904	0.00121072	0.0545454	0.0842719	-0.977914
P62815	Atp6v1b2	0.265677	0.108475	0.422879	21.7821	3.37273	0.00123468	0.0545454	0.0849188	-0.994963
D3ZHY9	Rasal1	-0.377729	-0.605769	-0.149689	19.2409	-3.30564	0.00151868	0.0628645	0.0949732	-1.17489
Q64428	Hadha	-0.420162	-0.674072	-0.166252	18.3459	-3.30235	0.00153407	0.0628645	0.0949732	-1.18363
A0A0G2K8W9	Sptbn1	-0.302421	-0.485209	-0.119632	20.9754	-3.30179	0.00153671	0.0628645	0.0949732	-1.18513
A0A0G2JTL4	Kit	-0.562928	-0.903455	-0.222402	16.6917	-3.30385	0.00157969	0.0628645	0.0957327	-1.20294
Q64542-3	Atp2b4	-0.824304	-1.32393	-0.324673	19.3275	-3.29249	0.0015811	0.0628645	0.0957327	-1.20984
Q5XI34	Ppp2r1a	-0.236431	-0.380152	-0.0927087	20.7458	-3.28297	0.00162779	0.063452	0.096392	-1.2351
P28037	Aldh1l1	-0.370283	-0.596273	-0.144292	17.9274	-3.26987	0.0016942	0.0647704	0.0990607	-1.26977
B1WBY1	Cul1	-0.936667	-1.51049	-0.36284	16.7088	-3.25844	0.00176496	0.0659088	0.101456	-1.30411
P49803	Rgs7	-0.586933	-0.947146	-0.22672	17.6753	-3.25174	0.00179028	0.0659088	0.101688	-1.31759
A0A0G2JZ69	Sptan1	-0.537929	-0.869317	-0.206541	21.2845	-3.23948	0.00185814	0.0660095	0.103614	-1.34983
A0A096MJ42	Dlg3	-0.527423	-0.852362	-0.202484	17.8614	-3.23925	0.00185942	0.0660095	0.103614	-1.35042
D3ZCV0	Actn2	-0.487279	-0.788266	-0.186291	18.485	-3.23084	0.00190736	0.0665232	0.105328	-1.37246
A0A0G2K5L2	LOC100911440	0.330416	0.124442	0.536389	20.1582	3.20137	0.00208477	0.0704487	0.111306	-1.44944
G3V640	Timm44	-0.627525	-1.018	-0.237052	16.1248	-3.2129	0.00209078	0.0704487	0.111306	-1.44463
Q63092	Camkv	-0.432027	-0.703044	-0.161009	20.9394	-3.18126	0.00221456	0.0733759	0.115844	-1.50167
Q4G079	Aimp1	0.294857	0.108932	0.480783	17.723	3.1649	0.00232573	0.0757958	0.119061	-1.54399
M0RAP5	Sbf1	0.241967	0.0882804	0.395654	18.4787	3.14201	0.00249002	0.0784788	0.121943	-1.60294
P13221	Got1	0.359422	0.131011	0.587833	22.852	3.14032	0.00250251	0.0784788	0.121943	-1.60725
A0A0H2UHZ1	Aqp4	-1.06454	-1.7411	-0.387979	17.69	-3.14275	0.00252648	0.0784788	0.121943	-1.61212
P22062	Pcmt1	-0.46912	-0.769006	-0.169234	19.7899	-3.12187	0.00264344	0.080688	0.125535	-1.65452
D3ZW55	Itpa	-0.491081	-0.80548	-0.176682	18.3121	-3.11716	0.00268062	0.080688	0.125535	-1.66657
P19103	Ppp1r1a	0.86884	0.311726	1.42595	18.4012	3.11231	0.00271937	0.080688	0.125723	-1.67894
P12346	Tf	-0.47682	-0.783783	-0.169858	18.6566	-3.09996	0.0028204	0.0824552	0.128896	-1.71039
P16617	Pgk1	0.146595	0.0520381	0.241151	22.4372	3.09395	0.00287087	0.0827142	0.130204	-1.72567
G3V7K3	Cp	-1.78573	-2.93425	-0.637202	16.024	-3.11635	0.00291711	0.0828458	0.130305	-1.69863
P97536	Cand1	-0.498397	-0.821857	-0.174936	20.0828	-3.07497	0.00303574	0.0850007	0.133091	-1.77376
Q68FT1	Coq9	-0.393003	-0.649534	-0.136471	17.8609	-3.05732	0.00319689	0.0864886	0.136676	-1.81827
M0RBJ0	Gng2	-1.67596	-2.7698	-0.582122	18.0559	-3.05941	0.00320954	0.0864886	0.136726	-1.7948
P31044	Pebp1	-0.370925	-0.613307	-0.128543	21.7536	-3.05402	0.00322792	0.0864886	0.136732	-1.82658
Q00981	Uchl1	-0.439313	-0.727003	-0.151623	21.8825	-3.04745	0.00329052	0.0864886	0.137313	-1.8431
B4F7C7	Hebp1	-0.556492	-0.921115	-0.191869	18.3882	-3.0458	0.0033064	0.0864886	0.137313	-1.84724
P08009	Gstm3	-0.50567	-0.837676	-0.173665	20.2904	-3.03955	0.00336726	0.0869366	0.138978	-1.86292
P0CC09	Hist2h2aa3	-0.634704	-1.05276	-0.216651	23.8589	-3.02989	0.00346337	0.0869526	0.139565	-1.88711
P60522	Gabarapl2	-1.05888	-1.75523	-0.36252	16.2464	-3.04098	0.00347998	0.0869526	0.139762	-1.88323
B5DEY8	Snx6	-0.50824	-0.844078	-0.172402	17.23	-3.02013	0.00356301	0.0869526	0.140439	-1.91148
Q4FZY0	Efhd2	0.613677	0.208109	1.01925	18.4013	3.0197	0.0035675	0.0869526	0.140439	-1.91256
B5DFN4	Pfdn5	0.590654	0.200064	0.981244	17.6872	3.01786	0.00358657	0.0869526	0.140726	-1.91714
A0A0G2JSV6		-0.619947	-1.03103	-0.208861	20.8734	-3.0096	0.00367351	0.0878595	0.141805	-1.9377
Q9WV48-3	Shank1	0.255024	0.0857137	0.424334	18.3476	3.00597	0.00371237	0.0878595	0.142383	-1.94674
F1LT35	RGD1564606	0.754918	0.252559	1.25728	19.1046	2.99897	0.0037883	0.0886016	0.144367	-1.96411
Q5FVH2	Pld3	0.531599	0.176356	0.886841	18.2568	2.98891	0.00395568	0.0914406	0.14791	-1.99804
P12007	Ivd	-0.353537	-0.59085	-0.116224	18.0871	-2.97303	0.00408257	0.0922331	0.150697	-2.02827
G3V9G3	Camk2b	0.287986	0.0946733	0.481299	22.2663	2.97302	0.00408275	0.0922331	0.150697	-2.02831
Q3KRE0	Atad3	0.611161	0.199909	1.02241	16.8596	2.96575	0.00416898	0.0926317	0.152072	-2.04622
F1LSY2	Nptxr	0.547774	0.178684	0.916863	18.9512	2.9618	0.00421649	0.0926317	0.1528	-2.05593
G3V7T3	Pank4	-0.901982	-1.50837	-0.295592	15.3996	-2.97787	0.00424018	0.0926317	0.1528	-2.03488
Q00959	Grin2a	0.341616	0.110777	0.572456	17.7416	2.95335	0.0043199	0.0933474	0.154833	-2.07669
P03994	Hapln1	-0.3295	-0.552618	-0.106381	20.2719	-2.94718	0.0043969	0.0939896	0.156021	-2.09181
P07936	Gap43	-0.694752	-1.1659	-0.223606	20.7608	-2.9428	0.00445222	0.0941598	0.156655	-2.10252
P01946	Hba1	-0.483815	-0.812595	-0.155034	23.5477	-2.9367	0.00453052	0.0948072	0.157093	-2.11744
Q63803	Gnas	-0.324646	-0.546698	-0.102595	18.67	-2.91772	0.00478229	0.0990332	0.160685	-2.1637
B2GUZ3	Mthfd1l	-0.507938	-0.856876	-0.159	17.0608	-2.90502	0.00495781	0.0999988	0.162911	-2.19451
P85971	Pgls	-1.50584	-2.54109	-0.470596	17.6755	-2.90799	0.00505086	0.0999988	0.164608	-2.17539
Q71SY3	Tsn	-0.686598	-1.15967	-0.213521	16.6286	-2.898	0.00510002	0.0999988	0.164859	-2.21668
A0A0G2K613	Marcksl1	-0.775885	-1.31142	-0.240353	19.3176	-2.89294	0.00517334	0.0999988	0.16615	-2.22887
P63055	Pcp4	0.560099	0.173019	0.947179	18.6417	2.88769	0.00520703	0.0999988	0.16615	-2.2364
D3Z9L0	Agk	-0.876717	-1.48354	-0.269897	16.2791	-2.88406	0.00528211	0.0999988	0.166924	-2.24764
P10760	Ahcy	-0.251532	-0.425968	-0.0770969	19.5292	-2.8777	0.00535586	0.0999988	0.166924	-2.26045
D3Z8I7	Gstt3	-0.345284	-0.584753	-0.105814	18.3127	-2.87748	0.00535924	0.0999988	0.166924	-2.26099
G3V8P7	Rin1	0.395999	0.1211	0.670897	16.3633	2.87559	0.00540966	0.0999988	0.166924	-2.268
D3ZZM9	Ccsap	0.521677	0.15943	0.883925	17.8174	2.87398	0.00541238	0.0999988	0.166924	-2.26941
B2RYG6	Otub1	-0.235636	-0.399421	-0.0718521	20.2609	-2.87116	0.00545553	0.0999988	0.167237	-2.27618
P18088	Gad1	-0.848452	-1.4375	-0.259407	17.0917	-2.87963	0.005468	0.0999988	0.167237	-2.25866
P06302	Ptma	-0.670561	-1.13694	-0.204184	18.5965	-2.86938	0.00548283	0.0999988	0.167261	-2.28044
F1M787	Ctnnd2	0.219422	0.0665077	0.372337	18.6503	2.86364	0.00557205	0.100216	0.167927	-2.29421
F1LNY3	Ncam1	-0.306901	-0.52089	-0.0929107	20.4668	-2.86214	0.00559557	0.100216	0.167927	-2.2978
P12839	Nefm	0.271784	0.0820364	0.461532	21.1366	2.85847	0.00565352	0.10035	0.168588	-2.30658
F7FG31	Ctbp1	-0.412288	-0.700766	-0.123809	18.514	-2.85216	0.00575454	0.101239	0.170412	-2.32168
P32851	Stx1a	-0.589129	-1.00663	-0.171624	18.4144	-2.81602	0.00636548	0.111005	0.1774	-2.40759
B2GV06	Oxct1	-0.234815	-0.402024	-0.0676054	19.467	-2.80254	0.00660819	0.11248	0.180415	-2.43941
Q62609	Olfm1	0.676097	0.194618	1.15758	18.0906	2.80233	0.0066121	0.11248	0.180415	-2.43992
A0A0G2JUG7		0.273825	0.0787927	0.468857	18.3657	2.80191	0.00661981	0.11248	0.180415	-2.44091
P05197	Eef2	0.169836	0.0485536	0.291119	19.554	2.79459	0.00675523	0.113808	0.182531	-2.45812
Q05175	Basp1	-0.79182	-1.3579	-0.225738	22.3928	-2.79148	0.00681376	0.11383	0.182639	-2.46545
Z4YNP1	Celf2	-1.47182	-2.52437	-0.419277	15.9974	-2.79382	0.00687413	0.113881	0.183024	-2.46903
P18484	Ap2a2	-0.266488	-0.457603	-0.0753735	20.761	-2.78273	0.00698046	0.114687	0.18421	-2.48598
P08050	Gja1	-0.253233	-0.435624	-0.0708416	20.5966	-2.77078	0.00721405	0.115512	0.186736	-2.51392
O35509	Rab11b	-0.802859	-1.38115	-0.224567	19.4632	-2.77063	0.00721708	0.115512	0.186736	-2.51428
Q9QYU4	Crym	-0.216157	-0.372074	-0.0602406	21.7907	-2.76671	0.0072953	0.115512	0.186816	-2.52342
G3V852	Tln1	-1.00447	-1.72942	-0.279515	16.5149	-2.76511	0.00732744	0.115512	0.186816	-2.52715
P63086	Mapk1	-0.294964	-0.508329	-0.0815985	20.2981	-2.75887	0.00745415	0.115512	0.186816	-2.5417
A0A0G2JXA8	Flot2	-0.417667	-0.720095	-0.11524	17.7327	-2.7561	0.00751102	0.115512	0.186816	-2.54814
D3ZWA8	Appl1	-0.334376	-0.576556	-0.0921955	17.6082	-2.75539	0.00752579	0.115512	0.186816	-2.54981
D3ZSY8	Tbc1d10b	0.306883	0.0844814	0.529286	18.2589	2.75373	0.00756008	0.115512	0.186816	-2.55366
G3V936	Cs	-0.251572	-0.434048	-0.0690954	21.2208	-2.75133	0.00761004	0.115512	0.186816	-2.55925
P49620	Dgkg	-0.924192	-1.59343	-0.25495	16.3826	-2.76266	0.00761171	0.115512	0.186816	-2.53466
B0BN18	Pfdn2	0.465813	0.127494	0.804132	17.6499	2.74771	0.00768574	0.115752	0.188055	-2.56764
D3ZB78	RGD1559864	-0.226227	-0.391389	-0.0610649	19.4571	-2.73351	0.00799	0.118382	0.189506	-2.60053
P06761	Hspa5	0.297738	0.0803073	0.515169	20.306	2.73275	0.00800658	0.118382	0.189506	-2.60228
P31399	Atp5h	-0.292082	-0.505499	-0.078666	21.2456	-2.73127	0.00803905	0.118382	0.189506	-2.60571
F1M7X3	Cdh13	-0.339312	-0.5897	-0.0889236	19.0778	-2.70441	0.00864821	0.126416	0.198377	-2.66751
B0K020	Cisd1	0.247883	0.0645766	0.431189	20.3602	2.69871	0.00878274	0.127199	0.199544	-2.68056
Q5XI77	Anxa11	0.2714	0.0704992	0.472301	18.4067	2.69597	0.00884808	0.127199	0.200148	-2.68683
P62994	Grb2	-0.850627	-1.48075	-0.220508	17.7151	-2.69403	0.00889449	0.127199	0.200176	-2.69125
O35112	Alcam	0.240253	0.0621076	0.418399	18.6983	2.69142	0.00895767	0.127199	0.200536	-2.69723
Q63259	Ptprn	0.680383	0.174251	1.18651	15.9638	2.6858	0.00921753	0.127801	0.201742	-2.70517
Q4FZT0	Stoml2	0.415268	0.106125	0.724411	17.8514	2.68074	0.00921943	0.127801	0.201742	-2.72155
G3V9L3	Dusp3	-1.23111	-2.14733	-0.314889	17.9001	-2.6838	0.00923465	0.127801	0.201742	-2.7201
D3ZK97	H3f3c	1.32201	0.336113	2.3079	21.768	2.67603	0.00933734	0.127801	0.20287	-2.73228
P10362	Scg2	0.494981	0.125639	0.864323	19.7861	2.67452	0.00937526	0.127801	0.203093	-2.7357
Q60587	Hadhb	-0.302991	-0.529111	-0.0768715	18.4373	-2.6741	0.00938582	0.127801	0.203093	-2.73665
Q63362	Ndufa5	-0.516128	-0.901972	-0.130284	19.5276	-2.66951	0.00950244	0.128509	0.203858	-2.74707
C0JPT7	Flna	-3.26165	-5.70207	-0.821232	15.179	-2.67284	0.00964826	0.129336	0.204413	-2.7191
G3V8L3	Lmna	-0.377012	-0.659642	-0.0943819	18.5444	-2.66209	0.0096937	0.129336	0.204415	-2.76388
F1MAR6	Prodh	-1.17694	-2.05954	-0.294333	16.1722	-2.66423	0.00976518	0.129421	0.204415	-2.75976
P02770	Alb	-0.430123	-0.753393	-0.106853	21.0194	-2.6553	0.00987194	0.12997	0.205502	-2.77924
Q6PCU2	Atp6v1e1	0.15751	0.038804	0.276217	21.6073	2.64802	0.0100661	0.130618	0.206891	-2.79566
B2GUV5	Atp6v1g1	0.260524	0.0641085	0.456939	20.3044	2.64703	0.0100929	0.130618	0.206891	-2.7979
P27605	Hprt1	-0.53349	-0.935845	-0.131136	18.9583	-2.64609	0.0101183	0.130618	0.206891	-2.80001
B0BN85	Sugt1	-0.602201	-1.05716	-0.14724	17.3983	-2.64152	0.0102426	0.130889	0.208133	-2.8103
A0A0G2K7J0	Acsbg1	0.24409	0.0596083	0.428571	18.6508	2.64048	0.010271	0.130889	0.208354	-2.81263
A0A0G2JZM2	Sec23a	-0.557741	-0.980313	-0.135169	17.9222	-2.63402	0.0104497	0.132318	0.210547	-2.82716
G3V7L6	Psmc2	0.316175	0.0762718	0.556077	18.1947	2.63014	0.0105583	0.132847	0.211307	-2.83586
P62744	Ap2s1	-0.500971	-0.882901	-0.11904	18.6591	-2.61767	0.0109142	0.136461	0.213767	-2.86375
Q5GFD9	Impact	-0.538612	-0.950628	-0.126596	19.048	-2.60885	0.0111726	0.136792	0.216322	-2.88343
P04904	Gsta3	-0.59143	-1.04407	-0.138785	19.5724	-2.60755	0.0112112	0.136792	0.216386	-2.88632
Q9QX80	Hnrnpab	-0.611612	-1.07987	-0.143356	19.0699	-2.60663	0.0112384	0.136792	0.216561	-2.88836
G3V6I9	Rpl26	0.432124	0.10067	0.763577	18.8317	2.60179	0.0113833	0.136792	0.217681	-2.89913
F1LQI4	Acan	0.859497	0.20033	1.51866	16.9705	2.60437	0.0114076	0.136792	0.217681	-2.86647
A0JPJ7	Ola1	-0.550977	-0.974179	-0.127776	18.0839	-2.5982	0.0114917	0.136792	0.217681	-2.90709
A0A0G2JTG7	Hnrnph1	-0.632639	-1.11868	-0.146602	18.1718	-2.59761	0.0115098	0.136792	0.217681	-2.90841
P21708	Mapk3	-0.253549	-0.448356	-0.0587412	18.2927	-2.59742	0.0115155	0.136792	0.217681	-2.90883
F1M8A4	Ppfia2	0.301942	0.069523	0.534361	17.6026	2.59262	0.0116625	0.136792	0.217821	-2.91948
F1M7S3	Pdyn	-0.862543	-1.52656	-0.198527	17.252	-2.59303	0.0116831	0.136792	0.217821	-2.9201
A0A0G2K4U8	Stx12	-0.342243	-0.60599	-0.0784965	18.5253	-2.58961	0.0117554	0.136792	0.218611	-2.92614
P84083	Arf5	-0.58607	-1.03778	-0.134359	18.4462	-2.58926	0.0117663	0.136792	0.218611	-2.92692
Q6PDU7	Atp5l	-0.634197	-1.12371	-0.144681	20.5802	-2.5855	0.0118835	0.137351	0.219565	-2.93524
F1LXA0	Ndufa12	-0.285571	-0.506444	-0.0646978	19.098	-2.58023	0.0120496	0.138465	0.221801	-2.94688
D3ZKQ4	Rabl6	-0.731467	-1.29939	-0.163542	16.7899	-2.57328	0.0124152	0.140917	0.224377	-2.94938
P00173-2	Cyb5a	-0.609992	-1.08396	-0.136027	18.0321	-2.56983	0.012453	0.140917	0.22438	-2.97284
Q3ZBA0	Tecpr1	-0.5132	-0.912309	-0.114092	17.2653	-2.56615	0.0125033	0.140917	0.22465	-2.97788
G3V9P7	Htt	-0.545	-0.969135	-0.120865	16.5416	-2.56436	0.0125622	0.140917	0.22465	-2.98182
Q6PCT3	Tpd52l2	0.715322	0.158274	1.27237	16.2131	2.56269	0.0126174	0.140917	0.224756	-2.98549
P14668	Anxa5	-0.777794	-1.38429	-0.171293	17.8859	-2.55929	0.01273	0.141381	0.224756	-2.99294
A0A0G2K2M9		0.530018	0.11565	0.944387	17.6482	2.55406	0.0129767	0.141869	0.226492	-3.00736
G3V864	Lppr4	0.300543	0.0654876	0.535599	19.8394	2.55166	0.0129865	0.141869	0.226492	-3.00965
D3ZJF9	Gla	0.361094	0.0787536	0.643434	16.596	2.55373	0.012988	0.141869	0.226492	-3.00809
Q6P2A5	Ak3	-0.590401	-1.05264	-0.128166	17.7897	-2.54971	0.0130884	0.142135	0.227605	-3.00252
Q6T487	Actn1	-0.530821	-0.946784	-0.114858	19.6308	-2.54671	0.0131553	0.142135	0.227746	-3.02046
G3V6H5	Slc25a11	-0.808626	-1.44484	-0.172408	19.0317	-2.53646	0.0135115	0.145194	0.231227	-3.04282
Q63525	Nudc	-0.566345	-1.01339	-0.119298	17.5773	-2.52822	0.0138041	0.146969	0.2339	-3.06074
A0A0G2JTW9		-1.09943	-1.96747	-0.231396	19.3755	-2.52765	0.0138246	0.146969	0.2339	-3.06197
D3ZQD3	Ogdhl	-0.536432	-0.960765	-0.112098	17.9591	-2.52286	0.0139974	0.146995	0.234664	-3.07236
B1H2A2	Fsd1	-0.779293	-1.39539	-0.163195	17.2832	-2.52796	0.0140075	0.146995	0.234664	-3.04484
P54900	Scn2b	-0.838517	-1.50286	-0.174179	16.7376	-2.51889	0.0141422	0.146995	0.234927	-3.08096
Q3MIE9	Sms	0.796338	0.164569	1.42811	16.546	2.5162	0.0142782	0.146995	0.234927	-3.07515
P04897	Gnai2	-0.32533	-0.583465	-0.0671955	20.2524	-2.51515	0.0142797	0.146995	0.234927	-3.08905
Q812E9	Gpm6a	-1.0093	-1.81067	-0.20793	18.8688	-2.51347	0.0143421	0.146995	0.234927	-3.09268
P04631	S100b	-0.450287	-0.808051	-0.0925231	22.5887	-2.51177	0.0144054	0.146995	0.234927	-3.09636
P63004	Pafah1b1	-0.452507	-0.812326	-0.0926885	18.2281	-2.50974	0.0144812	0.146995	0.235009	-3.10074
A0A0G2JUZ5		-0.820111	-1.47199	-0.168235	16.8348	-2.51598	0.0145341	0.146995	0.235243	-3.06436
Q9Z0G8	Wipf3	0.661347	0.13499	1.1877	18.7669	2.50747	0.0145664	0.146995	0.235243	-3.10564
D4A4Z9	Ktn1	0.506659	0.102988	0.910329	17.8086	2.50481	0.0146667	0.14726	0.235243	-3.11137
P11517		-0.557587	-1.00325	-0.111929	21.0871	-2.49756	0.0149813	0.147839	0.237765	-3.1282
Q5BJN7	LOC100360647	1.20552	0.24268	2.16837	16.8594	2.50392	0.0149899	0.147839	0.237765	-3.09598
Q5BJT9	Ckmt1b	0.200193	0.0400871	0.3603	22.1323	2.49533	0.0150296	0.147839	0.238079	-3.13177
G3V733	Syn2	-0.157981	-0.284423	-0.0315395	23.0323	-2.49346	0.0151024	0.147839	0.238398	-3.13579
P97846	Cntnap1	-0.309621	-0.557499	-0.0617431	19.1538	-2.49275	0.0151297	0.147839	0.238398	-3.1373
Q9WUS0	Ak4	-0.216979	-0.390922	-0.0430351	18.9964	-2.4894	0.0152606	0.147839	0.239168	-3.14448
D3ZA84	Tln2	-0.223438	-0.402713	-0.0441638	18.0428	-2.48729	0.0153439	0.147839	0.239245	-3.14902
Q52KS1	Pfkm	-0.177341	-0.319667	-0.0350147	20.7464	-2.48663	0.0153699	0.147839	0.239337	-3.15043
P41123	Rpl13	0.475465	0.0937848	0.857146	18.2434	2.48603	0.0153937	0.147839	0.239395	-3.15172
D4A4M0	Shisa6	0.407753	0.0801639	0.735342	18.3682	2.48402	0.0154733	0.147889	0.240008	-3.15602
M0RCH6	Chmp4b	0.353589	0.0692314	0.637946	18.5162	2.48154	0.0155721	0.148122	0.240914	-3.16133
Q5HZV9	Ppp1r7	-0.187268	-0.338067	-0.036469	18.7364	-2.47829	0.0157024	0.14865	0.241054	-3.16827
Q05140-2	Snap91	-0.270041	-0.487782	-0.0523005	20.9125	-2.47501	0.0158349	0.148747	0.241568	-3.17527
F1LQV9	Lin7a	-0.268893	-0.485767	-0.0520187	19.8452	-2.47433	0.0158624	0.148747	0.241643	-3.17672
P27139	Ca2	-0.570296	-1.0315	-0.109095	20.2252	-2.46773	0.0161329	0.150574	0.243561	-3.19079
P45592	Cfl1	0.22817	0.0435031	0.412836	23.7415	2.46579	0.0162129	0.150613	0.243561	-3.19491
P11608	Mt-atp8	1.38605	0.262427	2.50966	18.9132	2.46312	0.0164038	0.151678	0.244581	-3.203
G3V964	Ntm	-0.245801	-0.445694	-0.0459078	19.5511	-2.45399	0.0167087	0.153171	0.246965	-3.21997
P84076	Hpca	-0.67182	-1.21841	-0.125232	20.2269	-2.4529	0.0167551	0.153171	0.247038	-3.22228
P56574	Idh2	-0.316695	-0.574457	-0.0589324	20.0668	-2.45193	0.0167965	0.153171	0.247038	-3.22433
Q66WT9	Picalm	-0.365401	-0.663082	-0.0677206	19.0272	-2.44966	0.0168937	0.153355	0.247799	-3.22913
A0A0H2UHX1	Rtn3	-0.961599	-1.74661	-0.176586	18.3573	-2.44738	0.0171607	0.154795	0.248413	-3.23896
B4F7A3	Lgalsl	-0.578387	-1.05098	-0.105795	17.3808	-2.44241	0.0172081	0.154795	0.248797	-3.24445
Q9WVA1	Timm8a	0.623331	0.112544	1.13412	18.9792	2.43537	0.0175181	0.156874	0.250646	-3.25928
P62775	Mtpn	-0.622495	-1.13366	-0.111334	19.3676	-2.43033	0.0177435	0.158179	0.251171	-3.26989
P54313	Gnb2	-0.188147	-0.343048	-0.0332454	21.9258	-2.42398	0.018031	0.158586	0.253514	-3.28324
M0RDX2	Aplp2	-0.562623	-1.02554	-0.0997061	15.9799	-2.43229	0.0180753	0.158586	0.253514	-3.26178
P32736-2	Opcml	0.283998	0.0500325	0.517964	19.991	2.42242	0.0181019	0.158586	0.253514	-3.28649
M0R5H1	Etl4	0.261705	0.0460928	0.477317	17.186	2.42229	0.0181082	0.158586	0.253514	-3.28678
P62912	Rpl32	0.267209	0.0466467	0.487771	18.7953	2.41772	0.018318	0.15972	0.254956	-3.29633
Q68FU3	Etfb	-0.441795	-0.806899	-0.0766911	17.7068	-2.41485	0.018451	0.160137	0.25561	-3.30234
P04636	Mdh2	0.405936	0.0700675	0.741805	23.2012	2.41199	0.0185849	0.160137	0.256352	-3.30833
Q62747-2	Syt7	-0.952423	-1.7402	-0.164646	17.2848	-2.41627	0.0186075	0.160137	0.256352	-3.29521
Q63396	Sub1	-0.607486	-1.11112	-0.103848	17.3576	-2.40782	0.0188232	0.160425	0.257119	-3.30412
Q68FP1	Gsn	-1.23295	-2.25505	-0.21084	16.6299	-2.4116	0.0188755	0.160425	0.257119	-3.30471
P0DP31	Calm2	-0.430792	-0.788163	-0.0734213	21.4992	-2.40567	0.018883	0.160425	0.257119	-3.32152
A0A0G2JUI3	Dlgap2	0.490165	0.0826693	0.897661	16.8062	2.40118	0.0191396	0.161236	0.258108	-3.33196
A0A0G2K872	Cadm3	-0.187472	-0.343341	-0.031602	19.8338	-2.40027	0.0191407	0.161236	0.258108	-3.33274
A0A0H2UHG7	Rps20	0.388317	0.06516	0.711473	19.5567	2.39806	0.0192475	0.161452	0.258108	-3.33735
Q08602	Rabggta	-0.307072	-0.563308	-0.0508355	17.4864	-2.39159	0.0195625	0.163404	0.259268	-3.35079
P50554	Abat	-0.271584	-0.498761	-0.0444063	20.0618	-2.38575	0.0198504	0.165116	0.261342	-3.36288
P29266	Hibadh	-0.339695	-0.624284	-0.0551064	19.1329	-2.38209	0.020033	0.165243	0.262469	-3.37045
Q68FQ9	Lancl2	-0.480862	-0.883947	-0.0777774	18.6033	-2.38073	0.020101	0.165243	0.262509	-3.37325
A0A0H2UHQ0	Slc3a2	-0.307985	-0.566185	-0.0497849	19.7054	-2.38045	0.0201151	0.165243	0.262509	-3.37383
Q9QX69	Lancl1	-0.627815	-1.15494	-0.100694	18.3292	-2.37688	0.0202952	0.166037	0.263418	-3.3812
P05370	G6pdx	-0.297582	-0.547901	-0.0472636	17.96	-2.37247	0.02052	0.166682	0.263466	-3.39031
P61203	Cops2	-0.427336	-0.786865	-0.0678072	18.0495	-2.37204	0.0205419	0.166682	0.263466	-3.39118
P55051	Fabp7	-0.445804	-0.82159	-0.0700182	18.1998	-2.3675	0.0207756	0.167555	0.26384	-3.40053
Q6P503	Atp6v1d	0.184991	0.0290009	0.340982	20.2006	2.36668	0.020818	0.167555	0.26384	-3.40221
B0BNJ1	Sri	-0.644918	-1.18946	-0.100379	17.9059	-2.36353	0.0209817	0.16777	0.26384	-3.40868
A0A0G2K0T5	Micu1	0.692998	0.107761	1.27823	17.5524	2.36377	0.0210134	0.16777	0.26384	-3.40921
F1LML7	Hip1r	0.430852	0.0666688	0.795035	17.8251	2.36099	0.0211146	0.167904	0.264832	-3.4139
Q66HR2	Mapre1	-0.859483	-1.587	-0.131967	17.9812	-2.35766	0.0212902	0.168429	0.266474	-3.42073
A0A0G2K7W7	Gsk3a	0.296626	0.0454239	0.547827	19.6777	2.35653	0.0213501	0.168429	0.266664	-3.42305
P54319	Plaa	-0.782221	-1.4451	-0.119344	16.7936	-2.35838	0.021489	0.16853	0.267558	-3.41018
P29418	Atp5e	0.591248	0.0898533	1.09264	19.524	2.35394	0.0215325	0.16853	0.267697	-3.41973
P62275	Rps29	0.701957	0.106135	1.29778	19.6625	2.35246	0.0216578	0.168846	0.267697	-3.4334
Q924S5	Lonp1	0.208335	0.0312693	0.385401	17.6824	2.34809	0.0218017	0.169304	0.268125	-3.44032
F1LR18	Arhgap39	0.442029	0.0654912	0.818567	17.0355	2.34277	0.0220908	0.170599	0.270255	-3.45118
O88989	Mdh1	0.349977	0.051738	0.648217	23.2914	2.34186	0.0221401	0.170599	0.270329	-3.45302
Q5QJC9	Bag5	-0.696148	-1.28985	-0.102446	16.5332	-2.34343	0.0222955	0.171133	0.271367	-3.44048
Q63198	Cntn1	-0.19448	-0.360741	-0.0282185	21.3781	-2.33437	0.0225537	0.171687	0.271928	-3.46827
M0RBJ7	C3	-0.806227	-1.49558	-0.116872	17.1044	-2.33464	0.0225844	0.171687	0.271928	-3.44661
M0R9L2	Cntfr	-0.41537	-0.770614	-0.0601255	16.9107	-2.33472	0.0226267	0.171687	0.271928	-3.46151
A0A0A0MXW1	Bckdhb	-0.621415	-1.15356	-0.0892653	17.2404	-2.33106	0.0227844	0.172226	0.272045	-3.47594
D4A559	Dmtn	0.274309	0.0388477	0.509771	18.5347	2.32491	0.0230854	0.173642	0.272885	-3.48745
Q7TP14	Chid1	0.51989	0.0732737	0.966507	17.1623	2.32308	0.02319	0.173642	0.272885	-3.49117
Q8R2H0	Atp6v1g2	0.265657	0.0370732	0.49424	22.8091	2.31933	0.0234046	0.173642	0.272885	-3.49875
P13852	Prnp	-0.658459	-1.22554	-0.0913784	20.5334	-2.31724	0.0235252	0.173642	0.272885	-3.50298
P62083	Rps7	0.284553	0.0393736	0.529733	19.4933	2.31615	0.0235884	0.173642	0.272885	-3.50519
A0A0H2UHM5	Pdia3	0.215875	0.0298593	0.40189	20.1923	2.316	0.0235965	0.173642	0.272885	-3.50547
P11884	Aldh2	-0.327955	-0.610578	-0.045331	19.8615	-2.31575	0.0236112	0.173642	0.272885	-3.50598
Q63228	Gmfb	-0.590043	-1.09901	-0.0810733	18.0613	-2.31355	0.0237392	0.173642	0.272885	-3.51043
P31662	Slc6a17	-0.428459	-0.798097	-0.0588203	18.0456	-2.31323	0.0237578	0.173642	0.272885	-3.51107
D3ZBM3	Fech	0.305226	0.0416015	0.56885	17.7081	2.31059	0.0239122	0.17383	0.273991	-3.5164
Q5RJL0	Ermn	-0.396614	-0.739288	-0.0539404	17.075	-2.3098	0.0239585	0.17383	0.273995	-3.51799
M0RC99	Rab5a	0.673037	0.0913723	1.2547	18.1901	2.31402	0.0240714	0.174014	0.274081	-3.49134
P09456	Prkar1a	-0.428045	-0.798512	-0.0575767	18.1029	-2.30582	0.0241932	0.174261	0.274312	-3.526
G3V8A5	Vps35	-0.340418	-0.635415	-0.0454224	19.5031	-2.30294	0.0243639	0.174857	0.274659	-3.53178
Q9Z1B2	Gstm5	-0.510477	-0.953505	-0.0674491	18.1549	-2.29949	0.0245705	0.175706	0.275707	-3.53871
P28480	Tcp1	0.157221	0.0206176	0.293824	19.7044	2.29687	0.0247286	0.17599	0.2767	-3.54398
A0A0G2JW28	Add3	-0.229681	-0.429326	-0.0300353	18.9184	-2.29589	0.0247874	0.17599	0.276839	-3.54593
P84079	Arf1	-0.722707	-1.35189	-0.0935211	20.9648	-2.29229	0.0250062	0.176912	0.277928	-3.55314
Q5RJR2	Twf1	-0.582703	-1.09104	-0.0743697	17.91	-2.28763	0.025292	0.17778	0.279389	-3.56247
A0A0G2KAM4		0.395792	0.0503991	0.741185	19.1572	2.28686	0.0253391	0.17778	0.279389	-3.56399
P19527	Nefl	0.281547	0.0356082	0.527486	21.4355	2.2846	0.025479	0.17778	0.279897	-3.56851
Q80W89	Ndufa11	-0.264454	-0.495474	-0.033434	18.367	-2.28448	0.0254866	0.17778	0.279897	-3.56875
D4A249	Mblac2	-1.02499	-1.92098	-0.128993	17.3053	-2.28629	0.02563	0.178155	0.280716	-3.56971
P19492-2	Gria3	0.399832	0.0497932	0.74987	17.4136	2.27954	0.0257943	0.178366	0.280757	-3.57859
Q6P9V1	Cd81	-0.822352	-1.54252	-0.102183	20.0288	-2.27882	0.0258398	0.178366	0.280757	-3.58004
Q6AYD5	Gspt1	0.177456	0.021859	0.333054	17.6639	2.27602	0.0260161	0.178962	0.281152	-3.58561
Q6GMN2-2	Baiap2	0.197789	0.0240603	0.371518	19.3116	2.27205	0.0262681	0.180072	0.282276	-3.59351
P68255	Ywhaq	-0.264233	-0.497714	-0.0307528	21.7719	-2.25852	0.0271424	0.185426	0.284757	-3.62031
Q5M7T6	Atp6v0d1	-0.32397	-0.611727	-0.0362129	20.5109	-2.24681	0.02792	0.189159	0.286592	-3.64341
P11275	Camk2a	0.170299	0.0189902	0.321607	23.9278	2.24613	0.0279655	0.189159	0.286592	-3.64475
P62944	Ap2b1	-0.356112	-0.672531	-0.0396922	19.9994	-2.246	0.0279742	0.189159	0.286592	-3.645
P35439	Grin1	-0.453158	-0.85698	-0.0493365	17.6308	-2.23948	0.0284164	0.191497	0.28896	-3.65781
Q9JHU0	Dpysl5	-0.25979	-0.491731	-0.0278488	18.989	-2.23528	0.0287045	0.192786	0.289668	-3.66605
B2DD29	Brsk1	-0.290437	-0.550025	-0.030849	17.4494	-2.23282	0.0288741	0.193272	0.290152	-3.67086
F1LQ55	Scp2	-0.389181	-0.737272	-0.0410895	18.5029	-2.23123	0.0289842	0.193358	0.290524	-3.67397
Q05982	Nme1	-0.639213	-1.2114	-0.0670222	20.0069	-2.22942	0.0291106	0.193551	0.290873	-3.67752
D3ZUY8	Ap2a1	-0.356758	-0.676715	-0.0368015	19.4645	-2.2252	0.0294059	0.194286	0.291915	-3.68575
Q64057	Aldh7a1	-0.27222	-0.516376	-0.0280643	18.4819	-2.22505	0.0294166	0.194286	0.291915	-3.68605
A0A0G2JWM2	Sirt2	-0.351638	-0.667409	-0.0358662	19.0547	-2.22233	0.0296083	0.19436	0.292321	-3.69135
P61983	Ywhag	0.257978	0.0260759	0.489881	22.5474	2.22006	0.0297697	0.19436	0.292321	-3.69578
Q5XIG0	Nudt9	-0.703702	-1.33647	-0.0709302	16.4861	-2.22191	0.0298525	0.19436	0.29283	-3.6953
P35332	Hpcal4	-0.445727	-0.846796	-0.0446587	18.2468	-2.21788	0.0299253	0.19436	0.29299	-3.70003
O70196	Prep	-0.468402	-0.88992	-0.0468847	17.6808	-2.21763	0.0299426	0.19436	0.29299	-3.7005
P68511	Ywhah	-0.318233	-0.604741	-0.0317239	22.2353	-2.21663	0.0300144	0.19436	0.293001	-3.70245
Q3MIE4	Vat1	-0.312349	-0.59424	-0.0304581	18.093	-2.21129	0.0303992	0.196074	0.295038	-3.71283
P50503	St13	-0.553611	-1.0536	-0.0536179	17.9432	-2.20967	0.0305167	0.196074	0.295938	-3.71597
A0A0A0MY31	Itpr1	-0.79362	-1.51064	-0.0766036	17.7721	-2.20887	0.0305749	0.196074	0.296128	-3.71752
F1LT41	Vti1a	0.455463	0.0437314	0.867194	17.1215	2.21016	0.0306976	0.196228	0.296384	-3.70272
Q4KM38	Srsf10	0.340781	0.0318836	0.649678	17.4327	2.20225	0.0311123	0.198241	0.298215	-3.73107
G3V8L9	Ptrf	-0.96598	-1.84223	-0.0897345	15.869	-2.20394	0.0312728	0.198627	0.298215	-3.72139
A0A096MJN4	Sept4	-0.326011	-0.622142	-0.02988	18.0537	-2.19703	0.0314481	0.199104	0.299561	-3.74044
E2RUH2	Rnh1	0.298576	0.0270837	0.570068	18.4074	2.19475	0.0316186	0.199549	0.299839	-3.74484
G3V8K2	Gng3	-0.60609	-1.15852	-0.0536605	19.0532	-2.19011	0.0320205	0.20097	0.30217	-3.75448
B0BNA7	Eif3i	0.270721	0.02392	0.517523	17.2843	2.18908	0.032046	0.20097	0.30217	-3.75576
P37377	Snca	0.267878	0.0230905	0.512665	22.1572	2.18391	0.0324404	0.202804	0.304197	-3.7657
P11348	Qdpr	-0.239191	-0.458328	-0.0200543	19.7991	-2.17829	0.0328737	0.20454	0.30705	-3.77647
A0JN30	Cnpy2	0.22501	0.0188039	0.431216	17.8553	2.17764	0.032924	0.20454	0.30705	-3.77772
O35964	Sh3gl1	0.322741	0.0267359	0.618746	18.3548	2.17591	0.0330587	0.204737	0.307055	-3.78103
B1WC61	Acad9	-0.178852	-0.343293	-0.0144112	17.9108	-2.17056	0.0334788	0.205914	0.308605	-3.79128
Q5XIM5	Cdv3	-0.75994	-1.45901	-0.0608693	18.1521	-2.17002	0.0335746	0.205914	0.308946	-3.79297
A0A0G2JZY3		-0.523872	-1.00611	-0.0416309	16.0486	-2.16977	0.0337058	0.205914	0.308946	-3.77917
F1LPA6	Padi2	-0.689793	-1.32475	-0.0548352	16.6918	-2.17186	0.0337229	0.205914	0.308946	-3.73438
Q5U2V8	Emc3	0.347978	0.0275264	0.668429	17.2041	2.16829	0.0337666	0.205914	0.309109	-3.79695
Q9Z1T4	Cnksr2	0.201432	0.0156957	0.387168	17.8377	2.1643	0.0339748	0.20655	0.310169	-3.80321
P97878	Exoc5	0.408334	0.0312833	0.785385	17.3882	2.16124	0.0342205	0.207409	0.310169	-3.80905
P62755	Rps6	0.282524	0.021247	0.543801	18.4582	2.15795	0.0344858	0.207978	0.311862	-3.81531
F1LN69	Mink1	0.188375	0.014129	0.362622	18.5567	2.15748	0.0345235	0.207978	0.311967	-3.81619
Q68FZ8	Pccb	-0.598512	-1.15469	-0.0423384	16.7648	-2.14817	0.0353395	0.212251	0.315752	-3.83449
Q7TQ77	Hook3	-0.570444	-1.10256	-0.038332	17.9548	-2.14393	0.0360571	0.21512	0.317714	-3.80641
P62828	Ran	0.195156	0.0129962	0.377317	20.5215	2.13804	0.0361295	0.21512	0.317714	-3.853
M0R5T4	Rac3	-0.265798	-0.513871	-0.017725	17.9359	-2.14136	0.0361419	0.21512	0.317714	-3.82986
A0A0G2JY26	Dnajc6	-0.233199	-0.452604	-0.0137937	19.3153	-2.12113	0.0375794	0.222885	0.322248	-3.88479
B0BMX3	S100a16	-0.304768	-0.591651	-0.0178857	17.9165	-2.12008	0.0376707	0.222885	0.32269	-3.88674
A0A0G2JU49	Mtx1	-0.529467	-1.02872	-0.0302164	17.7933	-2.11644	0.0379895	0.224104	0.323688	-3.89354
O35867	Ppp1r9a	0.291757	0.0161159	0.567398	17.1355	2.11234	0.0383522	0.225575	0.325628	-3.90121
F1LPP6	Akap5	-0.397706	-0.773785	-0.0216257	18.0739	-2.11042	0.0385233	0.225912	0.326586	-3.9048
A0A0G2JSH9	Prdx2	-0.586863	-1.14239	-0.0313396	21.5355	-2.10824	0.0387173	0.226382	0.327299	-3.90885
Q8R491	Ehd3	-0.123347	-0.240461	-0.00623232	19.3901	-2.10186	0.0392922	0.228889	0.330054	-3.92072
P0C5X8	Ttyh1	-0.552395	-1.07711	-0.0276795	19.379	-2.10093	0.0393762	0.228889	0.33052	-3.92244
P09895	Rpl5	0.165257	0.00789992	0.322615	18.97	2.09585	0.0398403	0.230264	0.333017	-3.93188
P35213	Ywhab	0.250927	0.0119526	0.489901	22.6229	2.09548	0.0398746	0.230264	0.33307	-3.93257
O55173	Pdpk1	0.293404	0.0138515	0.572956	17.7113	2.09454	0.0399603	0.230264	0.333086	-3.9343
A2RUW1	Tollip	-0.53053	-1.03706	-0.0239958	18.6388	-2.0946	0.0403923	0.232081	0.335048	-3.92935
Q6AY84	Scrn1	-0.120485	-0.23569	-0.00527889	19.2199	-2.0871	0.0406496	0.232886	0.335781	-3.94806
Q5I0D5	Lhpp	-0.44385	-0.870453	-0.0172479	17.1765	-2.07635	0.0416646	0.238015	0.339928	-3.96788
A0A0G2JU66	Nploc4	-0.459091	-0.900744	-0.0174384	16.1066	-2.07446	0.041845	0.238066	0.340472	-3.97135
D3ZT47	Fam171a2	0.367939	0.0138671	0.722011	16.7287	2.07497	0.041913	0.238066	0.340472	-3.9714
Q5U2N2	Usp14	-0.226614	-0.445474	-0.0077533	17.8969	-2.06636	0.0426266	0.241429	0.343779	-3.98621
A0A0G2K8H0	Caprin1	-0.570485	-1.12209	-0.0188825	17.5657	-2.06512	0.0428649	0.242089	0.344327	-3.98951
D3ZC55	Hspa12a	-0.137149	-0.269848	-0.00445001	20.2315	-2.06258	0.042995	0.242136	0.344422	-3.99311
Q566R0	Them4	0.427157	0.0134643	0.840849	18.8328	2.06061	0.0431886	0.242158	0.345277	-3.99671
A2VD09	Abi1	0.23225	0.00726098	0.457239	18.8538	2.06007	0.0432424	0.242158	0.345476	-3.99771
A0A0G2K1M2	Dlg1	-0.354677	-0.698951	-0.0104039	17.4135	-2.05597	0.0436475	0.243739	0.345576	-4.00518
P62919	Rpl8	0.354692	0.00962208	0.699762	21.7655	2.05131	0.0441123	0.245645	0.348227	-4.01367
P06687	Atp1a3	0.0943681	0.00250417	0.186232	23.8901	2.05006	0.0442374	0.245653	0.348526	-4.01594
P10860	Glud1	-0.125328	-0.247479	-0.00317681	21.6116	-2.04756	0.044489	0.245705	0.34916	-4.02048
Q6P7Q2	Gpc1	0.306835	0.00777052	0.605899	17.8053	2.04751	0.0444939	0.245705	0.34916	-4.02057
G3V6D3	Atp5b	0.13022	0.00288736	0.257552	24.0376	2.04091	0.0451643	0.248522	0.351369	-4.03254
G3V624	Coro1c	0.126317	0.00262984	0.250004	19.5663	2.03809	0.0454536	0.248522	0.351383	-4.03764
Q7TQ70	Fga	-0.906264	-1.79376	-0.0187647	15.9215	-2.03958	0.0454838	0.248522	0.351383	-4.01743
F7FKI5	Pdha1	0.144992	0.00298448	0.286999	21.145	2.0376	0.045504	0.248522	0.351383	-4.03853
Q32Q06	Ap1m1	-0.592946	-1.17407	-0.0118236	17.7086	-2.03799	0.0456475	0.248623	0.351383	-4.0393
P62329	Tmsb4x	-0.289988	-0.574702	-0.00527503	23.7613	-2.03264	0.0460176	0.248776	0.351383	-4.0475
B2RZD6	Ndufa4	-0.467124	-0.926027	-0.00822161	20.0382	-2.03141	0.0461446	0.248776	0.351701	-4.04971
B2RYW9	Fahd2	-0.314334	-0.623201	-0.00546664	19.2409	-2.03098	0.0461897	0.248776	0.35182	-4.05049
A0A0G2JXG3	Tmem30a	0.278728	0.00470651	0.552749	19.4268	2.02994	0.0462986	0.248776	0.352222	-4.05237
F1M863	Ppfia4	0.382961	0.00646722	0.759456	16.1767	2.03107	0.0463014	0.248776	0.352222	-4.05128
G3V7I0	Prdx3	-0.31061	-0.616397	-0.0048229	19.3863	-2.02714	0.046592	0.249036	0.35284	-4.05741
P07943	Akr1b1	-0.225608	-0.447737	-0.00348008	19.6285	-2.02693	0.046614	0.249036	0.35284	-4.05779
G3V746	Grin2b	0.210541	0.00313912	0.417943	18.3683	2.02587	0.0467256	0.249036	0.352865	-4.0597
D4A7N1	Chchd6	0.230117	0.00286697	0.457367	18.5199	2.02084	0.0472575	0.251198	0.355139	-4.06874
P68182	Prkacb	-0.436677	-0.868334	-0.00501958	18.0023	-2.01887	0.0474674	0.2514	0.355139	-4.07227
P49911	Anp32a	0.484093	0.00538467	0.962802	18.4741	2.01811	0.0475484	0.2514	0.355139	-4.07364
Q07009	Capn2	-0.359613	-0.715816	-0.00341091	17.4387	-2.01477	0.0479063	0.25262	0.356473	-4.07962
B0BN83	Armc1	0.235107	0.00178712	0.468426	18.9692	2.01095	0.0483191	0.253717	0.357463	-4.08646
P13233	Cnp	-0.377682	-0.752579	-0.00278396	21.5232	-2.01048	0.0483697	0.253717	0.357463	-4.08729
P41499-1	Ptpn11	0.140885	0.000920374	0.28085	20.1503	2.00878	0.048554	0.253998	0.357982	-4.09032
P18395	Csde1	-0.277515	-0.553528	-0.00150214	16.5284	-2.00652	0.0488006	0.253998	0.359096	-4.09436
D3ZDC0	Nlgn3	-0.496509	-0.990514	-0.00250487	17.5177	-2.00578	0.0488818	0.253998	0.359471	-4.09569
Q3B8Q2	Eif4a3	0.635545	0.00234154	1.26875	17.0341	2.00304	0.0491823	0.253998	0.360216	-4.10057
Q03344	Atpif1	0.217426	0.000719977	0.434131	20.5017	2.00229	0.0492649	0.253998	0.360216	-4.1019
Q6PEC4	Skp1	-0.282424	-0.56397	-0.00087805	19.4172	-2.00188	0.0493097	0.253998	0.360216	-4.10263
D4AB01	Hint2	0.265058	0.00081474	0.529301	18.8136	2.00181	0.0493174	0.253998	0.360216	-4.10275
P62718	Rpl18a	0.389199	0.000848449	0.77755	17.9336	2.00002	0.0495155	0.254275	0.360216	-4.10594
P61980	Hnrnpk	-0.244496	-0.488606	-0.000386152	20.1669	-1.99882	0.0496488	0.254275	0.360445	-4.10808
Q9QXQ0	Actn4	-0.542009	-1.08342	-0.000596857	19.0159	-1.99786	0.049755	0.254275	0.360975	-4.10979
P26772	Hspe1	0.499772	0.000121794	0.999423	21.3373	1.99615	0.0499457	0.254471	0.361501	-4.11283
Q6DGG0	Ppid	-0.380087	-0.760259	8.41978e-05	17.6098	-1.99522	0.0500493	0.254471	0.362031	-4.11448
P29066	Arrb1	0.193834	-0.000205329	0.387874	18.0132	1.99355	0.0502361	0.254769	0.362722	-4.11744
P05765	Rps21	0.374282	-0.00181763	0.750383	19.6014	1.98656	0.0510857	0.258418	0.365099	-4.13024
P63045	Vamp2	0.265744	-0.00144464	0.532933	22.6697	1.98487	0.0512165	0.258422	0.365459	-4.13281
A0A0G2JV31		-0.180754	-0.362692	0.00118319	18.5264	-1.98268	0.0514662	0.259025	0.365459	-4.13667
A0A0G2KAI8		0.299499	-0.00251279	0.60151	17.1292	1.97906	0.0518824	0.26046	0.366414	-4.14307
Q5I0D1	Glod4	-0.414895	-0.833878	0.00408752	18.2349	-1.97619	0.0522132	0.260789	0.366414	-4.14812
Q6AYE2	Sh3glb1	0.615148	-0.00631925	1.23662	16.4764	1.97591	0.0523076	0.260789	0.366414	-4.14902
D3Z900	Marc2	0.375971	-0.00391657	0.755858	18.1863	1.97509	0.0523414	0.260789	0.366414	-4.15006
A0A0G2K6X9	Adk	0.294905	-0.00391719	0.593726	18.6204	1.9695	0.052993	0.263375	0.368822	-4.15988
D3ZCI0	Gk	-0.604784	-1.21867	0.00910425	16.4041	-1.96955	0.0533878	0.264196	0.370058	-4.16232
A0A0G2JZI2	Eprs	0.17963	-0.00272506	0.361985	18.3404	1.96584	0.0534239	0.264196	0.370058	-4.1663
D4A8L9	Btbd17	-0.27456	-0.55404	0.00491877	18.4243	-1.96054	0.054053	0.264855	0.371801	-4.17558
I6L9G6	Tardbp	-0.208393	-0.420601	0.00381512	18.2678	-1.95978	0.0541431	0.264855	0.371801	-4.1769
F1LXD6	Pitpnm2	0.4082	-0.00770321	0.824104	18.052	1.9587	0.0542728	0.264855	0.372478	-4.17879
D4A5L9	LOC679794	0.528854	-0.0101465	1.06785	19.3387	1.95809	0.0543452	0.264855	0.372612	-4.17985
D3ZSZ6	Dgkh	0.347814	-0.00673478	0.702364	18.5764	1.95775	0.054386	0.264855	0.372612	-4.18044
O70257	Stx7	-0.484645	-0.978801	0.00951114	17.6421	-1.95778	0.0544444	0.264855	0.372724	-4.18072
Q6P9U0	Serpinb6	-0.487945	-0.985557	0.00966769	16.9473	-1.95689	0.0544897	0.264855	0.372724	-4.18195
Q9QXU9	Pcsk1n	0.367055	-0.00939029	0.743501	20.8607	1.94588	0.0558255	0.270686	0.378775	-4.20112
Q6AY09	Hnrnph2	-0.262754	-0.53263	0.00712127	20.5783	-1.943	0.0561794	0.271656	0.379428	-4.20611
Q9Z2I7	Svop	0.333956	-0.00931481	0.677226	16.462	1.94204	0.056361	0.271656	0.380103	-4.20801
F1LPQ9	Akap2	0.452092	-0.0127543	0.916938	17.2645	1.94143	0.0564356	0.271656	0.380103	-4.19182
Q91ZY8	Trim9	0.342952	-0.00987388	0.695777	17.438	1.93981	0.0565737	0.271663	0.380604	-4.21164
Q5RJR8	Lrrc59	0.185878	-0.0060582	0.377814	17.5905	1.93267	0.0574651	0.274622	0.382622	-4.22398
D3Z941	Mars	0.218407	-0.0071194	0.443933	17.2021	1.93266	0.0574662	0.274622	0.382622	-4.224
Q3ZAU6	Rnf14	-0.28615	-0.582164	0.00986473	17.7979	-1.92915	0.0579083	0.275819	0.383378	-4.23005
P47860	Pfkp	0.104857	-0.003653	0.213368	20.8719	1.92848	0.0579941	0.275819	0.383668	-4.23122
Q5M7A7	Cnrip1	0.128194	-0.00478716	0.261176	19.9162	1.92382	0.0585864	0.276675	0.385391	-4.23923
F7EMB2	RGD1304704	-0.656102	-1.33671	0.0245111	16.9449	-1.92379	0.0585901	0.276675	0.385391	-4.23928
A0A0G2K7C1	Bag6	-0.462882	-0.943347	0.0175838	18.2555	-1.92262	0.0587392	0.276675	0.385391	-4.24128
G3V714	Scg5	0.242802	-0.00930362	0.494908	18.8664	1.92201	0.0588175	0.276675	0.385613	-4.24233
A0A140TAB4	H2afy	-0.425551	-0.867502	0.0164002	18.6055	-1.9216	0.0588699	0.276675	0.385613	-4.24304
F1LM33	Lrpprc	-0.20563	-0.419322	0.00806262	18.2292	-1.92036	0.0590292	0.276769	0.385793	-4.24517
M0R9Q1	LOC100911677	0.304566	-0.0122926	0.621425	17.1538	1.91824	0.059303	0.276775	0.386429	-4.24881
Q3KRE2	Mettl7a	-0.753351	-1.53729	0.0305906	16.4079	-1.92459	0.0593089	0.276775	0.386429	-4.17478
Q3T1J1	Eif5a	-0.397445	-0.811725	0.0168339	18.2761	-1.91457	0.0597782	0.277918	0.387519	-4.2551
F1M953	Hspa9	0.161569	-0.00688075	0.33002	20.8375	1.91414	0.0598335	0.277918	0.387667	-4.25583
D3ZLL8	LOC691716	-0.496524	-1.01578	0.0227324	17.3934	-1.90829	0.0605984	0.280815	0.390087	-4.26583
P62909	Rps3	0.182751	-0.00854929	0.374051	18.8584	1.90647	0.0608379	0.281269	0.390966	-4.26893
A0A0H2UHF9	Ablim2	0.400915	-0.0192466	0.821077	16.7283	1.90424	0.0611325	0.281773	0.391196	-4.27273
A0A140TAC3	Epn1	-0.256026	-0.524448	0.0123949	18.9621	-1.90351	0.0612302	0.281773	0.391401	-4.27398
B1WC34	Prkcsh	0.200921	-0.0101749	0.412018	18.2283	1.89947	0.0617676	0.282338	0.39301	-4.28085
Q5YLM1	Dagla	-0.414959	-0.851018	0.0211006	16.5647	-1.90127	0.0617966	0.282338	0.39301	-4.27913
O88321	Psmd4	0.207432	-0.0105357	0.4254	18.4414	1.8992	0.0618038	0.282338	0.39301	-4.28131
Q6Q0N1	Cndp2	0.190376	-0.0097618	0.390513	18.7641	1.89832	0.0619211	0.282338	0.39301	-4.2828
P11240	Cox5a	0.123524	-0.00662885	0.253676	22.324	1.89402	0.0624994	0.283747	0.394024	-4.29011
D3ZC89	Fam114a2	0.283789	-0.015457	0.583035	17.1115	1.89258	0.0626939	0.283747	0.394376	-4.29255
P27867	Sord	-0.661849	-1.35977	0.0360701	16.8999	-1.89304	0.0626963	0.283747	0.394376	-4.27441
P04906	Gstp1	-0.259527	-0.533304	0.01425	20.6556	-1.89179	0.0628011	0.283747	0.394466	-4.29389
P15865	Hist1h1e	0.402562	-0.0226778	0.827802	21.1984	1.88923	0.0631479	0.284259	0.395395	-4.29821
Q5FVM6	Mtmr12	0.281149	-0.0161269	0.578426	16.9249	1.8874	0.0633981	0.284259	0.3958	-4.30131
Q5XI22	Acat2	0.147921	-0.008553	0.304395	19.0003	1.88658	0.0635104	0.284259	0.3958	-4.3027
Q06486	Csnk1d	-0.617104	-1.27068	0.0364679	16.2111	-1.88482	0.0638154	0.284259	0.396371	-4.30597
A1L1M0	Prkaca	-0.332659	-0.684996	0.0196777	19.2335	-1.8842	0.0638355	0.284259	0.396371	-4.3067
D4A4K4	Vps13c	-0.427056	-0.879519	0.0254067	16.8851	-1.88411	0.0639125	0.284259	0.396454	-4.30714
F8WFW5	Pde2a	-0.275757	-0.567915	0.0164018	20.0087	-1.88362	0.0639153	0.284259	0.396454	-4.30768
P19234	Ndufv2	-0.434253	-0.894883	0.0263775	19.9831	-1.88138	0.0642243	0.284359	0.39737	-4.31147
F1LSW7	Rpl14	0.475982	-0.0289992	0.980963	18.1383	1.88157	0.0642628	0.284359	0.39737	-4.3114
G3V6L9	Fkbp3	-0.480089	-0.989619	0.0294414	17.1998	-1.88035	0.064367	0.284359	0.397808	-4.31321
D3ZGE6	Cttn	0.221782	-0.0138944	0.457459	18.91	1.87801	0.0646918	0.28516	0.398576	-4.31715
D4A5X7	Gdap1	-0.251491	-0.519015	0.0160331	19.6333	-1.87606	0.0649628	0.285721	0.399445	-4.32043
B0BND0	Enpp6	-0.898926	-1.85663	0.0587797	16.5901	-1.87369	0.0653589	0.286829	0.400001	-4.3247
G3V7P8	Ndrg4	-0.404001	-0.834719	0.0267162	18.2893	-1.87188	0.0655481	0.286837	0.400246	-4.32745
B2GV73	Arpc3	-0.252867	-0.522561	0.0168258	20.7827	-1.87115	0.0656494	0.286837	0.400341	-4.32866
D3ZD09	Cox6b1	0.237844	-0.0161698	0.491859	22.1946	1.86862	0.0660063	0.287328	0.400877	-4.3329
Q498U4	Sarnp	-0.286837	-0.593226	0.0195521	17.4449	-1.86831	0.0660507	0.287328	0.400883	-4.33343
G3V6Q3	Wdr13	0.186549	-0.0134617	0.38656	18.1118	1.86134	0.0670415	0.289897	0.403671	-4.34507
P15087	Cpe	-0.199922	-0.414328	0.0144831	18.7909	-1.86085	0.0671117	0.289897	0.403889	-4.34589
F1MA97	Thsd7a	-0.383872	-0.795859	0.0281139	17.4611	-1.86051	0.0672939	0.289897	0.404039	-4.33405
P35400	Grm7	-0.596539	-1.23708	0.0440023	16.0762	-1.86187	0.0673906	0.289897	0.404039	-4.33299
P30835	Pfkl	-0.195227	-0.404946	0.0144918	20.0347	-1.85776	0.0675564	0.289897	0.404039	-4.35105
Q68FS4-2	Lap3	0.36032	-0.0267695	0.74741	17.6739	1.85765	0.0675721	0.289897	0.404039	-4.35123
A0A0G2K761	Cul2	-0.709716	-1.4725	0.0530692	16.4566	-1.85785	0.0676765	0.289897	0.404039	-4.35146
O88954	Mpp3	-0.393921	-0.817481	0.0296384	17.434	-1.85602	0.0678079	0.289897	0.404204	-4.35395
A0A0G2KAS7	Slc1a3	-0.444173	-0.922578	0.0342314	19.6948	-1.85286	0.0682646	0.290643	0.40538	-4.3592
A0A0G2K724	Mcts1	-0.778004	-1.61703	0.0610192	16.1108	-1.85782	0.0684894	0.290643	0.405833	-4.33079
F2Z3Q8	Kpnb1	-0.148879	-0.309451	0.0116926	18.8578	-1.85034	0.0686325	0.290643	0.406065	-4.36339
A0A0H2UHQ1	Rpl17	0.198012	-0.015608	0.411633	19.6219	1.84985	0.068704	0.290643	0.406065	-4.3642
P14270-1	Pde4d	0.754644	-0.0603213	1.56961	21.1033	1.84795	0.0689823	0.290643	0.406065	-4.36736
P21533	Rpl6	0.204426	-0.0164655	0.425317	19.4573	1.8469	0.0691359	0.290643	0.406065	-4.36909
B0BNE6	Ndufs8	0.16139	-0.0130399	0.335819	20.416	1.84647	0.0691992	0.290643	0.406065	-4.36981
P23565	Ina	0.210705	-0.0171098	0.438519	21.8976	1.84578	0.069301	0.290643	0.406065	-4.37095
D4A565	Ndufb5	0.22474	-0.0183283	0.467809	18.8825	1.84518	0.0693891	0.290643	0.406065	-4.37195
O88768	Adap1	-0.163536	-0.340444	0.0133727	17.9768	-1.84481	0.0694443	0.290643	0.406065	-4.37257
G3V6V1	Rnpep	-0.15157	-0.315788	0.0126481	18.8595	-1.84195	0.0698658	0.291249	0.406679	-4.37728
O88377	Pip4k2b	0.168866	-0.0141387	0.351872	18.8128	1.84148	0.0699364	0.291249	0.406679	-4.37807
H1UBN0	Cpne7	-0.328191	-0.684048	0.0276652	20.1173	-1.84051	0.0700797	0.291249	0.406679	-4.37967
M0RBF0	Safb	0.637346	-0.0545233	1.32922	16.4194	1.84107	0.0703484	0.291249	0.406679	-4.35671
G3V762	Tsta3	-0.804204	-1.67737	0.0689611	16.3115	-1.8396	0.0704194	0.291249	0.406679	-4.36397
P63018	Hspa8	0.135145	-0.0117043	0.281994	23.0218	1.8366	0.0706631	0.291249	0.406679	-4.38613
P47875	Csrp1	-0.499593	-1.0425	0.0433146	18.7114	-1.83694	0.0706778	0.291249	0.406679	-4.36148
D4A197	Mcee	-0.405143	-0.845894	0.0356087	18.3852	-1.83443	0.0709885	0.291249	0.406765	-4.3897
Q8CF97	Vcpip1	0.183542	-0.0161686	0.383252	17.5283	1.83409	0.0710393	0.291249	0.406765	-4.39026
Q6AYK8	Eif3d	0.287216	-0.0253184	0.599751	17.6373	1.83399	0.0710542	0.291249	0.406765	-4.39042
F1M6T6	Ppp6r2	0.451307	-0.0403965	0.943011	16.7843	1.83325	0.0713699	0.291941	0.407321	-4.39229
G3V9W6	Aldh3a2	-0.56749	-1.18778	0.0527969	16.4315	-1.82681	0.0722755	0.295038	0.408512	-4.40274
P63142	Kcna2	-0.704988	-1.47821	0.0682332	17.9328	-1.82005	0.0732425	0.298192	0.410351	-4.41355
P35465	Pak1	-0.293145	-0.614772	0.0284817	17.5343	-1.81893	0.0733479	0.298192	0.410512	-4.41513
F1LMA4	Adrbk1	0.154688	-0.015281	0.324657	17.272	1.81624	0.0737646	0.299274	0.411528	-4.41953
Q6IMX8	Acot2	-0.332291	-0.697858	0.033275	16.6711	-1.81401	0.0741116	0.29997	0.411547	-4.42318
Q68FQ0	Cct5	-0.208955	-0.438937	0.0210272	20.033	-1.8132	0.074238	0.29997	0.411865	-4.4245
P02688-3	Mbp	0.86694	-0.0884454	1.82233	21.1686	1.81192	0.0745735	0.300714	0.412925	-4.41428
A0A0G2JZX9		-0.636052	-1.33781	0.0657019	17.2533	-1.80931	0.074913	0.301472	0.412925	-4.43106
Q4QQT3	Celf1	-0.453856	-0.957051	0.0493393	15.7891	-1.8015	0.0762873	0.306115	0.415741	-4.43392
O35331	Pdxk	0.303872	-0.0332366	0.64098	18.0444	1.7989	0.0764953	0.306115	0.416257	-4.44772
Q62888-2	Nlgn2	-0.496168	-1.04695	0.054616	16.9134	-1.79877	0.0766528	0.306115	0.416355	-4.43015
Q9WV97	Timm9	0.181612	-0.0201326	0.383357	19.1179	1.79651	0.0768787	0.306115	0.417012	-4.45159
P10960	Psap	-0.365207	-0.771255	0.040841	18.9721	-1.79493	0.0771319	0.306115	0.417893	-4.45414
D3ZXL9	Kctd4	-0.249862	-0.52768	0.0279557	16.7724	-1.79484	0.0771462	0.306115	0.417893	-4.45428
A0A0G2JU89	Ubr4	-0.526187	-1.11151	0.0591378	16.4886	-1.79555	0.0772406	0.306115	0.418024	-4.45383
A0A0G2JXY9	Epn2	0.167109	-0.0188579	0.353076	17.8114	1.79329	0.0773965	0.306115	0.418299	-4.45679
P05371	Clu	0.17829	-0.020158	0.376738	18.4241	1.79294	0.0774527	0.306115	0.418328	-4.45735
Q9Z2X5	Homer3	0.319074	-0.0365114	0.674659	18.0798	1.79075	0.0778084	0.306911	0.418602	-4.4609
D3ZXF9	Mrpl12	-0.589996	-1.2489	0.0689068	15.2703	-1.78956	0.0783589	0.307656	0.41931	-4.4537
Q68FS2	Cops4	-0.245149	-0.518873	0.0285755	18.5237	-1.78732	0.0783652	0.307656	0.41931	-4.46641
A0A0H2UHL9	Dbn1	-0.118173	-0.250187	0.0138413	20.5325	-1.78642	0.0785124	0.307656	0.41931	-4.46786
P59215-2	Gnao1	-0.863111	-1.82798	0.101755	18.2027	-1.78896	0.0786163	0.307656	0.41931	-4.45546
F1LQ48	Hnrnpl	-0.255636	-0.542063	0.0307909	21.4228	-1.78113	0.0793813	0.310039	0.421397	-4.47637
A0A0G2K8T0	Asah1	-0.693172	-1.47177	0.0854217	16.6738	-1.78045	0.0800114	0.311888	0.422852	-4.44938
A0A1W2Q6E9	Msn	-0.766372	-1.62807	0.0953307	16.154	-1.77862	0.0803152	0.31244	0.423706	-4.44788
G3V960	Gamt	-0.340302	-0.723072	0.0424682	17.0204	-1.77628	0.0804675	0.31244	0.423947	-4.47494
A0A0H2UHF5	Kcnj10	0.423852	-0.0535747	0.901279	16.6171	1.77429	0.080874	0.313406	0.42515	-4.46433
F1LQJ7	Pck2	-0.192801	-0.410079	0.0244763	17.7832	-1.77085	0.0810911	0.313567	0.42548	-4.49281
A0A0G2K459		-0.22628	-0.481407	0.0288465	19.4289	-1.77002	0.081231	0.313567	0.42577	-4.49414
Q5XIJ3	Idh3g	-0.130043	-0.276781	0.0166943	19.9757	-1.76862	0.0814667	0.313868	0.426574	-4.49638
G3V984	Bsn	0.168165	-0.0217584	0.358089	20.2328	1.76703	0.0817341	0.314289	0.427224	-4.4989
G3V856	LOC100912512	-0.716662	-1.52715	0.0938219	16.131	-1.76562	0.0821099	0.315125	0.428062	-4.48814
P61265	Stx1b	-0.252933	-0.539251	0.0333845	20.5469	-1.76297	0.0824228	0.315447	0.428976	-4.50537
Q68FR6	Eef1g	0.121357	-0.0161493	0.258863	19.5624	1.76128	0.0827099	0.315447	0.429501	-4.50804
P21670	Psma4	-0.549608	-1.17261	0.0733921	17.2501	-1.76205	0.0827884	0.315447	0.429583	-4.50742
P83732	Rpl24	0.470247	-0.0627875	1.00328	17.8412	1.76059	0.0828286	0.315447	0.429583	-4.50915
A0A0H2UHV9	Copg2	0.379585	-0.0509925	0.810163	17.2772	1.76081	0.0830009	0.315499	0.429889	-4.49034
Q4V7A0	Wdr61	-0.407558	-0.870233	0.0551176	16.3338	-1.7589	0.0832554	0.315862	0.430796	-4.51222
Q75Q39	Tomm70a	-0.120617	-0.257851	0.0166164	19.5991	-1.75402	0.0839558	0.317298	0.431939	-4.51955
Q9JHZ4	Gripap1	0.216497	-0.0298568	0.462852	17.8532	1.7538	0.0839949	0.317298	0.431939	-4.51991
Q68FR9-2	Eef1d	0.278846	-0.0388881	0.59658	19.1118	1.75141	0.0844087	0.317298	0.431939	-4.52368
P23965	Eci1	-0.19158	-0.409895	0.0267344	18.7551	-1.75128	0.0844316	0.317298	0.431939	-4.52389
Q641Z9	Sdhc	-0.426692	-0.91304	0.0596557	17.6084	-1.75087	0.0845017	0.317298	0.431939	-4.52453
Q9Z269	Vapb	-0.436066	-0.933246	0.0611132	18.8062	-1.75035	0.0845916	0.317298	0.431939	-4.52535
Q5M821	Ppm1h	0.304606	-0.0431009	0.652313	18.123	1.74828	0.0849522	0.318051	0.433037	-4.52862
G3V940	Coro1b	0.243277	-0.0347632	0.521316	19.4728	1.74614	0.085326	0.31885	0.433647	-4.53199
F1LUT4	Atp8a1	-0.204914	-0.439384	0.0295564	19.6726	-1.7441	0.0856853	0.319592	0.434547	-4.53522
P10888	Cox4i1	0.211446	-0.0306928	0.453585	21.7096	1.7427	0.0859313	0.319876	0.435424	-4.53742
P10824	Gnai1	-0.275901	-0.592007	0.0402055	19.8474	-1.74183	0.0860834	0.319876	0.43601	-4.53877
D3ZT36	Adam23	0.157838	-0.0236268	0.339303	18.0598	1.73582	0.0871483	0.323229	0.437871	-4.54821
G3V8B3	LOC100910200	-0.272944	-0.586959	0.0410698	21.296	-1.73465	0.0873579	0.323403	0.438412	-4.55005
Q920L2	Sdha	-0.212438	-0.458023	0.0331462	20.4923	-1.72631	0.088857	0.328188	0.441804	-4.56308
Q5BJU7	Wasf1	0.163455	-0.0255782	0.352488	19.2028	1.72563	0.0889806	0.328188	0.44194	-4.56415
A0A0G2K350	Napg	0.179274	-0.0282069	0.386755	20.1041	1.72435	0.0892117	0.328431	0.442143	-4.56613
A0A0A0MY13	Gpr158	-0.195897	-0.422911	0.0311174	18.3456	-1.72211	0.0896195	0.328939	0.443495	-4.56962
F1M6X3	Kcnq2	0.475132	-0.0758124	1.02608	16.4351	1.72467	0.0896805	0.328939	0.443495	-4.55428
Q63327-2	Mobp	-0.65797	-1.42135	0.105407	17.1341	-1.72105	0.0899516	0.329326	0.443732	-4.57158
A0A0H2UHG3	Cul5	-0.44055	-0.952385	0.0712846	16.6219	-1.71917	0.0903687	0.330245	0.444502	-4.57469
G3V982	Elmo2	0.314042	-0.0521579	0.680242	18.225	1.71142	0.0915861	0.334079	0.447721	-4.58621
Q9R1Z0-2	Vdac3	-0.387638	-0.840322	0.0650465	19.5418	-1.7089	0.092054	0.335171	0.447988	-4.5901
D4ACB8	Cct8	0.209798	-0.0356438	0.455239	19.1983	1.70584	0.0926254	0.336635	0.448585	-4.59482
D4ADE5	Setd7	-0.445463	-0.967288	0.076361	17.7824	-1.70363	0.0930415	0.33753	0.448585	-4.59824
E9PSJ4	Spag9	0.281995	-0.0487709	0.61276	16.5741	1.7014	0.0934602	0.338431	0.449197	-4.60166
B3DMA1	Atxn2l	0.270081	-0.0471023	0.587265	16.5239	1.69977	0.0938383	0.339183	0.449754	-4.60433
Q9JLU4-2	Shank3	0.198498	-0.034964	0.431959	18.179	1.69678	0.0943351	0.339582	0.45059	-4.60877
F1LYQ8	Farp1	-0.458291	-0.997392	0.0808109	17.9301	-1.69698	0.0943675	0.339582	0.45059	-4.60862
D4A6G6	LOC100362339	0.363183	-0.0643603	0.790726	19.138	1.69524	0.0946284	0.339582	0.45059	-4.61113
F1LM55	Ccar2	0.263523	-0.0467029	0.573749	17.5331	1.69522	0.094632	0.339582	0.45059	-4.61116
Q5XIF3	Ndufs4	0.274975	-0.0492485	0.599199	19.4998	1.69253	0.0951474	0.340816	0.451123	-4.61529
G3V734	Decr1	-0.277306	-0.604817	0.0502049	17.6073	-1.68974	0.095682	0.341137	0.451123	-4.61956
A0A096MKH2	Vta1	-0.284761	-0.6212	0.0516777	18.9153	-1.69006	0.0957607	0.341137	0.451123	-4.61936
A0A0G2JYT1	Erc1	0.254833	-0.0462653	0.555931	17.263	1.68902	0.0958213	0.341137	0.451123	-4.62066
A0A0G2JTD7	Clasp1	0.276947	-0.0503827	0.604277	16.7067	1.68849	0.0959233	0.341137	0.451123	-4.62147
D4A781	Ipo5	-0.448564	-0.97923	0.0821028	17.7774	-1.6869	0.0962298	0.341417	0.451901	-4.6239
A0A0G2K6S9	Myh11	-0.951558	-2.07768	0.174568	16.9935	-1.6863	0.0963454	0.341417	0.452266	-4.62481
Q99NA5	Idh3a	-0.190466	-0.416005	0.0350723	21.0632	-1.68533	0.0965342	0.341477	0.452796	-4.6263
Q3B7U9	Fkbp8	0.128991	-0.0239258	0.281907	17.8144	1.68341	0.0969055	0.341798	0.453591	-4.62922
O08662	Pi4ka	-0.306386	-0.669672	0.0569004	17.4598	-1.68309	0.0969689	0.341798	0.453591	-4.62971
Q63633-2	Slc12a5	-0.369764	-0.809288	0.0697603	19.6763	-1.67891	0.0977831	0.344058	0.455621	-4.63606
P05065	Aldoa	0.0904789	-0.0173201	0.198278	23.3246	1.67502	0.0985484	0.345621	0.45687	-4.64198
G3V8V1	Grn	0.303709	-0.0583081	0.665726	19.6213	1.67423	0.0987035	0.345621	0.4572	-4.64318
Q794E4	Hnrnpf	-0.608243	-1.33408	0.117595	17.6746	-1.67234	0.0990776	0.345621	0.457711	-4.64604
Q6AYR2	Ndrg3	-0.238177	-0.522412	0.0460592	18.2424	-1.67227	0.0990906	0.345621	0.457711	-4.64614
Q5FVI6	Atp6v1c1	-0.165529	-0.363144	0.0320847	20.0057	-1.67164	0.0992149	0.345621	0.457711	-4.64709
Q5XIC6	Psmd12	-0.376728	-0.826553	0.073097	16.7892	-1.67136	0.0992705	0.345621	0.457711	-4.64752
P27653	Mthfd1	0.145955	-0.0295128	0.321423	17.5071	1.66	0.101544	0.352918	0.462911	-4.66467
G3V7V3	Slc27a4	0.27622	-0.0563695	0.60881	16.6552	1.65742	0.102065	0.353625	0.464646	-4.66855
A0A0G2K0T6	Sncg	-0.679773	-1.49836	0.138816	17.9999	-1.65724	0.102103	0.353625	0.464646	-4.66882
D3ZX38	Pfdn1	0.230981	-0.0475439	0.509506	18.0837	1.655	0.102557	0.354579	0.465014	-4.67218
Q6BBI8	Ufc1	-0.415244	-0.917166	0.0866779	16.9804	-1.65103	0.103369	0.356235	0.466244	-4.67814
P19804	Nme2	-0.223259	-0.493225	0.0467075	21.903	-1.65039	0.1035	0.356235	0.466572	-4.6791
Q5XHZ0	Trap1	-0.251624	-0.555955	0.0527075	18.1678	-1.65003	0.103573	0.356235	0.466646	-4.67963
A0A0G2K719	Ddx3y	-0.251722	-0.556779	0.0533345	18.1023	-1.64675	0.104248	0.356828	0.467633	-4.68454
Q6Q7Y5	Gna13	-0.170327	-0.376758	0.0361035	17.5692	-1.64663	0.104273	0.356828	0.467633	-4.68471
B5DF91	Elavl1	-0.34449	-0.762014	0.0730344	17.2829	-1.64657	0.104284	0.356828	0.467633	-4.6848
A0A0G2K7G2		-0.342754	-0.758708	0.0732003	17.2556	-1.64537	0.104673	0.357253	0.468673	-4.67294
P28818	Rasgrf1	-0.178368	-0.394943	0.0382073	17.5243	-1.64359	0.104901	0.357253	0.469162	-4.68924
F1LMW7	Marcks	-0.586517	-1.2991	0.126065	18.5343	-1.6426	0.105106	0.357253	0.469648	-4.69072
Q78P75	Dynll2	-0.377113	-0.835309	0.081084	20.4257	-1.6425	0.105127	0.357253	0.469648	-4.69087
D3ZX42	Rabgap1	-0.233943	-0.518533	0.0506469	17.496	-1.6405	0.105543	0.3576	0.470447	-4.69385
Q5XI39	Cryzl1	-0.378435	-0.839654	0.0827828	16.2734	-1.63985	0.10605	0.3576	0.471158	-4.69527
O35095	Ncdn	-0.213076	-0.47267	0.0465192	21.4625	-1.63804	0.106057	0.3576	0.471158	-4.69751
A0A0G2JTN4	LOC100912917	-0.152143	-0.337524	0.0332379	18.3372	-1.63785	0.106097	0.3576	0.471158	-4.6978
P15650	Acadl	-0.245923	-0.545696	0.0538503	18.6699	-1.63717	0.10624	0.3576	0.47134	-4.69881
P38718	Mpc2	-0.849532	-1.88537	0.186304	17.7894	-1.63717	0.106309	0.3576	0.47134	-4.69891
Q9QX74-2	Shank2	-0.272523	-0.605546	0.0604993	17.4854	-1.63311	0.107092	0.358872	0.473282	-4.70482
P07632	Sod1	0.174923	-0.0389221	0.388769	21.4822	1.63243	0.107236	0.358872	0.47357	-4.70584
D4AEI5	Myef2	0.186427	-0.0415716	0.414425	18.6706	1.63179	0.107372	0.358872	0.473668	-4.70679
M0R7U1	Ak5	-0.148879	-0.331066	0.0333078	18.82	-1.63081	0.107578	0.358872	0.473668	-4.70824
Q5XII9	Mtfr1l	0.255346	-0.0571368	0.567828	17.667	1.63076	0.107589	0.358872	0.473668	-4.70831
P85108	Tubb2a	0.287674	-0.0647659	0.640114	24.1035	1.62893	0.107977	0.359239	0.4743	-4.71102
O55166	Vps52	0.31335	-0.0706398	0.697341	17.0549	1.62853	0.108061	0.359239	0.474402	-4.7116
P63170	Dynll1	-0.555487	-1.23762	0.126648	19.1064	-1.62514	0.108784	0.36104	0.47555	-4.71662
F1M820	Sorbs1	-0.350965	-0.783187	0.081257	16.3249	-1.62138	0.10973	0.362666	0.47843	-4.71188
D3ZBU7	RGD1310819	0.173401	-0.0401432	0.386946	18.7067	1.62051	0.109777	0.362666	0.47843	-4.72345
P29314	Rps9	-0.298639	-0.666723	0.0694442	17.6392	-1.61915	0.110069	0.362666	0.479335	-4.72544
D4A2G9	Ranbp1	-0.21496	-0.480049	0.0501282	18.4707	-1.61828	0.110256	0.362666	0.479417	-4.72672
Q9EQX9	Ube2n	-0.532321	-1.18893	0.124289	18.1007	-1.6179	0.110337	0.362666	0.479417	-4.72727
Q6AZ35	Dync1i2	0.219081	-0.0511763	0.489338	18.5026	1.61776	0.110369	0.362666	0.479417	-4.72749
B2RYQ5	Erh	-0.549532	-1.22916	0.130099	18.0964	-1.61408	0.111236	0.363812	0.480815	-4.73293
Q5EBD0	Sec14l2	0.128441	-0.0304298	0.287312	19.144	1.61342	0.11131	0.363812	0.480815	-4.73386
A0A0G2JWA8	Macf1	-0.148756	-0.333191	0.0356782	18.0971	-1.60961	0.112141	0.363812	0.482112	-4.73944
Q5XIG4	Ociad1	-0.501972	-1.12465	0.120704	17.2824	-1.61065	0.112205	0.363812	0.482112	-4.73831
Q3T1K5	Capza2	0.19073	-0.0458947	0.427356	21.4294	1.60859	0.112363	0.363812	0.482112	-4.74092
P21575-5	Dnm1	-0.24714	-0.553831	0.05955	19.5588	-1.60816	0.112457	0.363812	0.482168	-4.74155
F1MAQ5	Map2	0.868142	-0.209871	1.94615	17.8589	1.60898	0.112571	0.363812	0.482412	-4.72001
Q9Z0W5	Pacsin1	0.195256	-0.0472473	0.437759	21.8992	1.60684	0.112747	0.363812	0.482412	-4.74348
A0A0G2K0S1	Calcoco1	0.450849	-0.109152	1.01085	17.8435	1.60712	0.112757	0.363812	0.482412	-4.74317
B2GUZ9	Fam49b	-0.12325	-0.276374	0.0298734	19.7997	-1.60632	0.112862	0.363812	0.482559	-4.74424
Q63041	A1m	-0.747662	-1.67738	0.18206	17.0809	-1.60995	0.112872	0.363812	0.482559	-4.67639
O35274	Ppp1r9b	0.147575	-0.0357959	0.330946	18.7851	1.60609	0.112914	0.363812	0.482563	-4.74458
P63012	Rab3a	0.133719	-0.0329235	0.300362	22.8641	1.60138	0.113953	0.366568	0.485268	-4.75144
A0A0G2K1I6	Scamp1	-0.205911	-0.462841	0.0510185	18.8096	-1.59938	0.114397	0.36663	0.485799	-4.75435
Q66H12	Naga	-0.432088	-0.971378	0.107203	17.4723	-1.60031	0.114407	0.36663	0.485799	-4.74248
E9PT53	Wfs1	-1.15986	-2.60797	0.288249	15.9418	-1.59977	0.114526	0.36663	0.485799	-4.75406
Q63065	Pdk1	-0.324269	-0.730221	0.0816828	17.0527	-1.59976	0.115215	0.368243	0.486229	-4.75473
P63331	Ppp2ca	-0.308724	-0.695293	0.0778458	19.1958	-1.59378	0.115647	0.368659	0.486362	-4.76248
Q8K4Y5	Lgi1	-0.159642	-0.359576	0.0402926	18.5889	-1.59348	0.115716	0.368659	0.486362	-4.76292
Q5XIT1	Mapre3	-0.307441	-0.692904	0.0780222	19.0525	-1.59172	0.116112	0.369127	0.48659	-4.76547
Q8CG45	Akr7a2	-0.146221	-0.32964	0.0371974	18.4771	-1.59094	0.116286	0.369127	0.48659	-4.76659
Q5FVM4	Nono	0.196216	-0.0500071	0.442439	19.2819	1.59035	0.11642	0.369127	0.48659	-4.76745
Q64303	Pak2	0.471354	-0.12139	1.0641	17.4852	1.58878	0.117066	0.370586	0.487388	-4.75697
Q6P3V8	Eif4a1	0.147548	-0.0381667	0.333263	18.8713	1.58553	0.117511	0.371402	0.48855	-4.77441
F1LTW9	Efr3b	-0.444925	-1.00579	0.115936	17.0462	-1.58357	0.118026	0.372439	0.490017	-4.77731
F1LYA6	Abi2	0.321308	-0.0843964	0.727012	18.7031	1.58051	0.118654	0.373827	0.490542	-4.78163
B0K008	Eif1	-0.388258	-0.879192	0.102677	17.3891	-1.58214	0.118906	0.373978	0.490542	-4.68611
A0A0G2JTW1		0.199512	-0.0527411	0.451764	18.4214	1.57928	0.119078	0.373978	0.490542	-4.78356
P63088-2	Ppp1cc	0.370662	-0.0985986	0.839923	18.7267	1.57677	0.119583	0.374971	0.490542	-4.76711
Q66HF3	Etfdh	0.195345	-0.0522261	0.442915	18.5945	1.57467	0.119999	0.375186	0.490693	-4.79003
G3V8J5	Psd	-0.208397	-0.472636	0.0558417	17.1337	-1.57392	0.120173	0.375186	0.49073	-4.7911
O35458	Slc32a1	-0.23507	-0.533167	0.0630261	18.2683	-1.57372	0.120218	0.375186	0.490746	-4.79138
F1M0J7	Prickle2	0.281365	-0.0770775	0.639808	17.3592	1.56652	0.121892	0.379815	0.494955	-4.80167
Q62829	Pak3	0.148984	-0.0416792	0.339648	20.0568	1.55941	0.123567	0.383829	0.497941	-4.8118
D4A644	Map7d1	0.182404	-0.0510285	0.415836	18.3057	1.55941	0.123567	0.383829	0.497941	-4.8118
A0A0G2JWS2	Nebl	-0.350896	-0.800641	0.0988486	18.0767	-1.55704	0.124128	0.384972	0.499669	-4.81517
F1LU71	Auh	0.194109	-0.0549259	0.443144	19.278	1.55551	0.124492	0.385276	0.500485	-4.81734
Q6IRJ7	Anxa7	-0.231014	-0.527494	0.0654662	17.9078	-1.555	0.124614	0.385276	0.500529	-4.81806
G3V792	Dync1i1	0.148336	-0.0422635	0.338935	19.174	1.55314	0.125056	0.386042	0.501063	-4.82068
A0A0G2K398	Gpx4	-0.656628	-1.50156	0.188306	17.5286	-1.55365	0.125387	0.386465	0.501886	-4.82034
Q68FW9	Cops3	-0.222262	-0.508378	0.0638536	18.1775	-1.55028	0.125741	0.386954	0.501952	-4.82473
A0A0G2K0V4	Arhgef2	0.157885	-0.0455611	0.36133	18.803	1.54874	0.126111	0.387494	0.502926	-4.82691
P14480-2	Fgb	-0.899467	-2.06019	0.261254	15.899	-1.55026	0.126369	0.387576	0.503233	-4.82528
P62959	Hint1	0.270708	-0.0785382	0.619954	21.0669	1.54688	0.126559	0.387576	0.503242	-4.82953
D3ZES7	Plxna4a	0.144121	-0.0418941	0.330136	18.3393	1.5462	0.126722	0.387576	0.503681	-4.83049
A0A0G2JZS1	Kpna6	-0.279386	-0.640411	0.08164	17.5139	-1.54568	0.127064	0.387667	0.504008	-4.83136
Q06647	Atp5o	0.169805	-0.049641	0.38925	21.608	1.54422	0.127201	0.387667	0.504008	-4.83328
P63259	Actg1	0.0978798	-0.0286605	0.22442	24.7833	1.54366	0.127337	0.387667	0.50423	-4.83407
M0RAM5	Gpx1	-0.659655	-1.51519	0.195885	17.2731	-1.54003	0.128433	0.390406	0.504827	-4.82506
A0A0G2KB98	Gsk3b	0.166844	-0.0497367	0.383425	17.7712	1.53737	0.128868	0.39113	0.505568	-4.8429
P14669	Anxa3	-0.157777	-0.36291	0.0473568	18.3497	-1.53494	0.129462	0.392333	0.506967	-4.8463
Q80W98	Sgtb	-0.290389	-0.668519	0.0877404	17.3891	-1.53301	0.130007	0.392776	0.508013	-4.83806
B5DF89	Cul3	-0.118676	-0.273221	0.0358696	19.1874	-1.53247	0.13007	0.392776	0.508013	-4.84975
A0A0G2JUC7	Dctn2	0.114339	-0.0346106	0.263289	19.2743	1.53194	0.130201	0.392776	0.508016	-4.8505
P21913	Sdhb	0.170622	-0.0519197	0.393163	19.8575	1.53007	0.130664	0.393576	0.508337	-4.85312
R9PXU6	Vcl	-0.312753	-0.721291	0.0957853	17.49	-1.52776	0.131235	0.39415	0.509106	-4.85633
A0A0H2UHE1	Suclg1	0.216233	-0.0662368	0.498703	21.7201	1.5277	0.131251	0.39415	0.509106	-4.85642
B2RYS2	LOC685596	-0.168254	-0.388244	0.0517366	20.6437	-1.52633	0.131591	0.394574	0.509106	-4.85833
F1M9N9	Ank2	-0.105065	-0.242675	0.0325448	20.2371	-1.52369	0.132249	0.395951	0.509484	-4.862
Q5U3Y8	Btf3	0.375764	-0.117398	0.868926	16.3094	1.52329	0.1328	0.396825	0.50974	-4.86288
P04775	Scn2a	-0.2167	-0.501039	0.0676401	17.4311	-1.52092	0.13294	0.396825	0.50974	-4.86584
Q499Q4	Pgm1	-0.241325	-0.55817	0.0755195	19.6544	-1.52	0.133172	0.396905	0.510198	-4.86713
Q4KLH4	Pspc1	0.242676	-0.0761041	0.561455	17.4488	1.51922	0.133367	0.396905	0.510198	-4.8682
F1M2K6	Pkp4	0.157351	-0.0494773	0.364179	18.1743	1.51826	0.133609	0.397033	0.510634	-4.86953
P68403-2	Prkcb	0.114267	-0.0363841	0.264918	20.0753	1.51368	0.134765	0.39987	0.51308	-4.87587
D3ZEI4	Hepacam	-0.120723	-0.280256	0.03881	19.5538	-1.51017	0.135657	0.401918	0.514834	-4.88072
P62762	Vsnl1	-0.378345	-0.878877	0.122187	19.4526	-1.50849	0.136086	0.402521	0.516069	-4.88303
A9UMV9	Ndufa7l	0.283304	-0.0916686	0.658276	18.972	1.50779	0.136266	0.402521	0.516321	-4.884
F1LQD2	Camkk1	0.203168	-0.0661219	0.472458	18.2088	1.50564	0.136815	0.402548	0.516923	-4.88695
F7F350		0.311035	-0.10143	0.723501	16.4973	1.50574	0.136931	0.402548	0.516964	-4.86007
F8WFS9	Add2	0.12872	-0.0419531	0.299393	20.1169	1.50511	0.136952	0.402548	0.516964	-4.88769
A0A0G2JZX5		0.17508	-0.0571432	0.407304	17.5854	1.50459	0.137085	0.402548	0.516983	-4.8884
F1LUA1	Eea1	-0.183325	-0.426841	0.0601899	17.3376	-1.50239	0.137651	0.403612	0.518178	-4.89142
G3V6U3	Alg2	-0.18387	-0.428311	0.060571	18.5059	-1.50115	0.137971	0.403957	0.518501	-4.89312
A0A0G2K6X6	Mark2	-0.175345	-0.408895	0.0582041	17.5381	-1.49831	0.138705	0.405323	0.520033	-4.89701
Q6PW34	Nrcam	-0.103288	-0.240911	0.0343352	19.4653	-1.49777	0.138846	0.405323	0.520033	-4.89775
P07895	Sod2	-0.378507	-0.884612	0.127597	20.1765	-1.49252	0.140212	0.407177	0.522212	-4.90492
P21575	Dnm1	-0.100062	-0.233994	0.03387	22.4795	-1.49098	0.140616	0.407177	0.522329	-4.90702
Q62717	Cadps	-0.135286	-0.316421	0.0458496	19.5973	-1.49051	0.140738	0.407177	0.522329	-4.90766
Q8CFN2	Cdc42	-0.222892	-0.521393	0.0756094	19.5891	-1.49017	0.140829	0.407177	0.522329	-4.90813
Q5FVI3	Lrrc57	-0.207476	-0.485467	0.0705141	16.862	-1.48986	0.14098	0.407177	0.522358	-4.90859
Q63413	Ddx39b	0.146388	-0.0497445	0.34252	18.6366	1.48951	0.141002	0.407177	0.522358	-4.90903
A0A0G2K8R3		0.361083	-0.12291	0.845076	17.1747	1.49012	0.141056	0.407177	0.522358	-4.90831
P62278	Rps13	-0.267427	-0.625956	0.091101	18.3069	-1.48857	0.141249	0.407177	0.522404	-4.9103
Q09073	Slc25a5	0.180977	-0.0617252	0.423678	20.4952	1.48811	0.141368	0.407177	0.522404	-4.91092
Q3S4A5	Arfgap1	0.167883	-0.0573517	0.393117	17.7034	1.4875	0.141529	0.407177	0.522404	-4.91175
P05696	Prkca	-0.14533	-0.340525	0.0498648	19.1353	-1.48584	0.141966	0.407293	0.52298	-4.914
Q4V7D2	Rogdi	-0.384378	-0.900658	0.131902	18.3973	-1.4858	0.141979	0.407293	0.52298	-4.91407
Q80U96	Xpo1	-0.417124	-0.978519	0.14427	17.4702	-1.48281	0.142771	0.408974	0.524151	-4.91813
D3ZI07	Kif3b	0.24192	-0.0845934	0.568434	16.6339	1.47862	0.143883	0.411567	0.525353	-4.92379
D3ZZK3	Epha4	0.162974	-0.0572828	0.383232	18.3378	1.47664	0.144412	0.412486	0.526429	-4.92646
A0A0G2JZ83		-0.124855	-0.293886	0.0441759	18.3231	-1.4741	0.145094	0.413663	0.527131	-4.9299
Q5PQZ9	Ndufc2	-0.14644	-0.344898	0.0520183	19.5191	-1.47257	0.145504	0.413663	0.527572	-4.93195
D4A601	Taco1	0.299067	-0.106885	0.705018	16.2033	1.47601	0.145579	0.413663	0.52764	-4.90775
B2RZ74	Snrnp70	-0.355191	-0.836784	0.126402	16.7367	-1.47227	0.145656	0.413663	0.527759	-4.9324
D3ZWL6	Ahcyl2	0.208519	-0.0743656	0.491405	18.5947	1.47104	0.145918	0.413817	0.528424	-4.93402
Q04462	Vars	-0.117781	-0.278228	0.0426661	18.0843	-1.46497	0.147561	0.41788	0.532237	-4.94216
A0A0G2K9A2	Arpc2	-0.256971	-0.607488	0.0935456	19.9076	-1.46306	0.148082	0.418759	0.532583	-4.94473
D4A3I4	Btf3l4	-0.377178	-0.892624	0.138267	17.1114	-1.46292	0.148569	0.419539	0.532583	-4.89099
A0A140TAI3	Hnrnpc	-0.133548	-0.316104	0.0490071	20.2611	-1.45992	0.14894	0.41999	0.533195	-4.94892
P63312	Tmsb10	-0.262531	-0.621813	0.09675	20.938	-1.45825	0.149398	0.420685	0.534008	-4.95115
Q6GMM8	Slc27a1	-0.228058	-0.541169	0.0850522	17.8524	-1.45357	0.150691	0.423219	0.535703	-4.9574
Q6P502	Cct3	0.0668952	-0.0249555	0.158746	19.9653	1.45345	0.150724	0.423219	0.535703	-4.95756
Q5XIF6	Tuba4a	0.175461	-0.0657709	0.416692	22.3869	1.45155	0.151249	0.424094	0.536069	-4.96008
D3ZS58	Ndufa2	0.603275	-0.227618	1.43417	19.3365	1.44936	0.151928	0.424799	0.536787	-4.94965
G3V9W0	Cetn2	-0.215003	-0.511203	0.081198	17.2411	-1.44859	0.152073	0.424799	0.536982	-4.96401
A0A0G2K6T9		-0.126084	-0.299813	0.0476461	18.1119	-1.44834	0.152141	0.424799	0.537064	-4.96434
D3ZG43	Ndufs3	-0.277933	-0.661677	0.105811	19.4545	-1.44539	0.152966	0.425457	0.538084	-4.96825
Q9ERB4-2	Vcan	-0.103749	-0.24701	0.0395118	19.0226	-1.44525	0.153004	0.425457	0.538084	-4.96843
Q9EQS0	Taldo1	0.175009	-0.0667384	0.416757	19.456	1.44473	0.153152	0.425457	0.538084	-4.96913
A0A0G2JTB2	Gbe1	-0.33706	-0.802796	0.128677	16.8516	-1.44468	0.153233	0.425457	0.538211	-4.95797
D3ZT90	Gcdh	-0.363934	-0.867616	0.139748	17.391	-1.44235	0.153886	0.426177	0.539106	-4.97228
G3V8C3	Vim	-0.578324	-1.37874	0.222095	18.929	-1.44192	0.15394	0.426177	0.539106	-4.97284
Q5XI19	Fermt2	-0.469891	-1.12076	0.180975	16.1357	-1.44198	0.154136	0.426177	0.539316	-4.94234
Q8K3M6	Erc2	0.12305	-0.0476915	0.293791	18.1704	1.43823	0.154979	0.427915	0.54041	-4.9777
A0A0G2K7W6	Rpl27a	0.225565	-0.0876196	0.538749	17.8914	1.43733	0.155233	0.428021	0.540658	-4.97888
D4A1S6	Ppp1r12a	-0.345445	-0.825918	0.135027	16.2917	-1.43646	0.155768	0.428902	0.540691	-4.89728
F1LS72	Uba2	0.201604	-0.0790624	0.482271	17.1237	1.43388	0.156281	0.429259	0.540691	-4.9833
Q568Z9	Phyhip	-0.178637	-0.427334	0.0700594	19.5293	-1.43347	0.15633	0.429259	0.540691	-4.98396
Q6AXV4	Samm50	-0.333119	-0.797413	0.131176	18.3979	-1.43183	0.156796	0.429392	0.541369	-4.98611
A0A0G2JTR4		-0.12669	-0.303273	0.0498938	18.6367	-1.43179	0.15681	0.429392	0.541369	-4.98617
P52555	Erp29	0.159596	-0.0631159	0.382309	19.2929	1.4301	0.157292	0.429641	0.542473	-4.98839
F1LRV4	Hspa4	-0.161108	-0.385952	0.0637363	20.1012	-1.42995	0.157334	0.429641	0.542473	-4.98858
D3ZPC4	L1cam	-0.154652	-0.370748	0.0614443	18.079	-1.42822	0.15783	0.430407	0.543637	-4.99085
P20171	Hras	0.107611	-0.0430053	0.258228	18.6953	1.42584	0.158512	0.431675	0.543826	-4.99395
D3ZQL7	Tppp	0.17122	-0.068721	0.411162	21.3071	1.42409	0.159018	0.432459	0.544422	-4.99624
Q6AXX6	Fam213a	-0.263143	-0.632138	0.105853	17.5655	-1.42317	0.159283	0.432587	0.545015	-4.99744
Q9JJ19	Slc9a3r1	0.0825451	-0.0335289	0.198619	19.534	1.4192	0.160433	0.435118	0.546724	-5.00262
M0RB22	Ptprd	-0.444114	-1.06923	0.181007	16.9576	-1.41901	0.160701	0.435251	0.546724	-4.9882
G3V728	Nipsnap1	-0.123928	-0.298675	0.0508194	20.281	-1.41529	0.161571	0.436204	0.547142	-5.0077
P04762	Cat	-0.141357	-0.340845	0.0581313	17.3708	-1.41412	0.161913	0.436204	0.547312	-5.00921
F1M9B5	Atp2c1	-0.291689	-0.704074	0.120697	16.9506	-1.41196	0.162616	0.436204	0.547964	-5.01179
F1MAA5	Rangap1	0.30353	-0.125775	0.732835	16.9798	1.41098	0.162832	0.436204	0.54814	-5.01327
P12711	Adh5	0.209215	-0.0867405	0.50517	18.906	1.41076	0.162898	0.436204	0.54814	-5.01357
Q1JU68	Eif3a	0.153121	-0.0635274	0.36977	17.5306	1.41048	0.162981	0.436204	0.54814	-5.01393
P02688	Mbp	0.428476	-0.177817	1.03477	24.343	1.41036	0.163015	0.436204	0.54814	-5.01408
Q7TPB1	Cct4	0.101313	-0.0421322	0.244758	19.8737	1.4095	0.163268	0.436204	0.54814	-5.01519
D3ZUX5	Chchd3	0.20135	-0.083829	0.486529	18.7689	1.40903	0.163407	0.436204	0.54814	-5.0158
F1M6A8	Akt3	-0.163992	-0.396268	0.0682833	17.3004	-1.40899	0.16342	0.436204	0.54814	-5.01586
P40329	Rars	0.121158	-0.0504671	0.292783	18.0264	1.40883	0.163467	0.436204	0.54814	-5.01606
Q5PQK2	Fus	-0.345292	-0.834899	0.144316	18.0806	-1.40742	0.163881	0.436377	0.548271	-5.01788
P43425	Gng7	0.521192	-0.218792	1.26118	18.3453	1.40765	0.164179	0.436377	0.548757	-5.01744
P70600	Ptk2b	-0.119413	-0.289037	0.0502118	18.9483	-1.40491	0.164624	0.436377	0.549165	-5.02112
F8WFR6	Gyg1	-0.453126	-1.09724	0.190985	17.3549	-1.40471	0.164823	0.436377	0.549165	-5.0214
A0A0G2K4Y7		-0.1196	-0.28964	0.0504407	19.4872	-1.40367	0.164992	0.436377	0.549165	-5.02272
F1LRI5	Gcn1l1	0.343634	-0.145007	0.832276	16.3215	1.40382	0.165015	0.436377	0.549165	-5.02253
Q5U1W6	Apool	-0.382127	-0.92583	0.161576	16.2078	-1.40464	0.165068	0.436377	0.549165	-4.99192
P02680-2	Fgg	-0.538044	-1.30392	0.227836	17.1136	-1.40199	0.165492	0.436493	0.550011	-5.02488
P24473	Gstk1	-0.44034	-1.06769	0.187007	17.4298	-1.40155	0.165761	0.436493	0.550292	-5.0046
Q7M0E3	Dstn	-0.292708	-0.709642	0.124226	18.3555	-1.40105	0.165771	0.436493	0.550292	-5.02609
P35815	Ppm1b	-0.277184	-0.673087	0.118719	16.7477	-1.39761	0.166867	0.438799	0.551813	-5.03052
D4A1Q2	Mapt	0.111046	-0.0480205	0.270112	21.2955	1.39319	0.168124	0.441171	0.553513	-5.03616
B2RYX0	Naca	-0.630015	-1.5336	0.27357	20.262	-1.39392	0.168346	0.441171	0.553984	-5.0239
O89049	Txnrd1	-0.320242	-0.779426	0.138943	16.2359	-1.3918	0.168542	0.441171	0.553984	-5.03794
M0RBE5	Nrn1	0.374509	-0.16321	0.912227	18.0086	1.39152	0.168912	0.441171	0.554084	-5.01791
Q5XHX3	Enah	-0.299897	-0.730658	0.130863	17.912	-1.38939	0.169272	0.441171	0.554084	-5.04102
A0A0G2JXP3	Nedd4l	0.218334	-0.095352	0.532019	17.834	1.38903	0.169379	0.441171	0.554084	-5.04147
Q6P9Y4	Slc25a4	-0.162408	-0.395743	0.0709279	21.5652	-1.38903	0.169379	0.441171	0.554084	-5.04147
Q9ESH6	Glrx	0.153685	-0.0672051	0.374574	19.57	1.38849	0.169545	0.441171	0.554163	-5.04217
A0A0G2K0S7		0.208934	-0.0920491	0.509916	17.1241	1.38571	0.170456	0.442721	0.555907	-5.04571
A0A0H2UI35	Homer1	-0.222812	-0.543976	0.0983516	17.7788	-1.38452	0.17075	0.442721	0.555907	-5.04722
P40307	Psmb2	-0.410799	-1.00301	0.181413	18.1379	-1.38433	0.170808	0.442721	0.555907	-5.04746
G3V9Y1	Myh10	-0.0787838	-0.192453	0.0348855	19.2132	-1.38319	0.171157	0.443046	0.556434	-5.04891
P97710	Sirpa	-0.127686	-0.312022	0.0566492	20.1225	-1.38236	0.171408	0.443119	0.556644	-5.04996
F7EUU4		-0.323954	-0.792391	0.144482	17.1836	-1.38013	0.172092	0.444309	0.557953	-5.05279
D3ZPJ0	Shisa7	-0.665284	-1.62992	0.299351	16.8239	-1.37636	0.173251	0.446722	0.559271	-5.05757
A8WCF8	Tprg1l	-0.199582	-0.489326	0.0901621	17.8733	-1.37465	0.173776	0.447495	0.559502	-5.05972
D3ZE85	Frrs1l	0.296195	-0.134699	0.727089	17.5081	1.37181	0.174656	0.44918	0.561082	-5.06331
P61972	Nutf2	-0.604083	-1.48502	0.276853	17.821	-1.36964	0.175539	0.449592	0.562262	-5.06602
B0BNE5	Esd	-0.161463	-0.39695	0.0740245	19.8643	-1.36833	0.175736	0.449592	0.562262	-5.06768
P18422	Psma3	0.165496	-0.07625	0.407243	18.3823	1.3662	0.1764	0.449592	0.562262	-5.07036
F1LMV9	Coro2b	0.100026	-0.0462467	0.246298	18.9038	1.36469	0.176872	0.449592	0.562594	-5.07225
F1LMB9	Exoc2	-0.442486	-1.08984	0.204868	16.656	-1.3641	0.177059	0.449592	0.562632	-5.073
Q6IN22	Ctsb	-0.172961	-0.426053	0.0801306	18.9401	-1.36382	0.177146	0.449592	0.562632	-5.07334
P13803	Etfa	-0.179597	-0.442447	0.0832532	18.8332	-1.36357	0.177224	0.449592	0.562664	-5.07366
P14408-2	Fh	-0.113017	-0.278596	0.0525625	20.2086	-1.36215	0.177671	0.449592	0.563183	-5.07544
A0A0G2K189	Scrn3	-0.323018	-0.796581	0.150545	17.654	-1.362	0.177854	0.449592	0.563266	-5.0756
P47819	Gfap	0.156282	-0.0728799	0.385444	22.2163	1.36099	0.178036	0.449592	0.563441	-5.07689
O08651	Phgdh	0.242386	-0.113397	0.598169	19.4317	1.35959	0.178474	0.449592	0.563944	-5.07863
D3ZP47	Phpt1	-0.285592	-0.70508	0.133896	17.2675	-1.35867	0.178766	0.449592	0.56426	-5.07979
Q6AY99	Akr1b10	-0.210265	-0.519156	0.0986256	17.8483	-1.35847	0.178829	0.449592	0.564304	-5.08004
Q8VIL3	Zwint	-0.364398	-0.899958	0.171162	18.539	-1.35786	0.179021	0.449592	0.564344	-5.0808
G3V6Y6	Pygb	-0.149383	-0.368937	0.0701704	21.5806	-1.35784	0.179027	0.449592	0.564344	-5.08082
A2VCX1	Tiprl	-0.242321	-0.598552	0.113909	18.0642	-1.35789	0.179078	0.449592	0.564344	-5.08075
B0BN81	Rps5	0.153344	-0.0722444	0.378932	18.1952	1.35655	0.179434	0.449592	0.564483	-5.08243
Q99ML5	Pcyox1	-0.256603	-0.63437	0.121164	18.3264	-1.35558	0.179743	0.449592	0.564483	-5.08364
Q4QQV4	Hars	0.238605	-0.112675	0.589886	17.4547	1.35554	0.179754	0.449592	0.564483	-5.08369
D3ZAF6	Atp5j2	-0.322168	-0.796549	0.152212	19.6183	-1.35532	0.179824	0.449592	0.564483	-5.08396
O88794	Pnpo	-0.196655	-0.486242	0.0929318	17.2549	-1.35523	0.179853	0.449592	0.564483	-5.08408
A0A0G2K293	Negr1	0.256372	-0.1213	0.634044	18.7046	1.3547	0.180021	0.449592	0.564483	-5.08474
D3ZSS1	Taf15	0.403396	-0.19183	0.998622	17.3455	1.35447	0.180453	0.449592	0.564757	-5.0306
Q642E2	LOC100362069	0.273846	-0.12999	0.677682	18.6391	1.35328	0.180472	0.449592	0.564757	-5.08651
F1LMZ8	Psmd11	-0.142077	-0.351725	0.0675718	18.0998	-1.35244	0.180739	0.449592	0.564757	-5.08755
D4A8H8	Cyfip1	-0.154951	-0.383701	0.0737994	18.4539	-1.35182	0.180936	0.449592	0.564757	-5.08832
A0A0G2JY08	Myo18a	0.110227	-0.052526	0.272981	17.5703	1.35159	0.181008	0.449592	0.564757	-5.0886
Q66HM7	Ssb	-0.45957	-1.13876	0.219622	17.4691	-1.35035	0.181405	0.449592	0.565128	-5.09015
A0A0G2JTH4	Cd47	0.313715	-0.150009	0.77744	19.5394	1.35009	0.181488	0.449592	0.565128	-5.09047
P52759	Hrsp12	-0.351051	-0.870355	0.168253	18.3184	-1.35062	0.181601	0.449592	0.565128	-5.07854
P36972	Aprt	-0.340037	-0.844392	0.164319	17.7061	-1.34547	0.182965	0.452406	0.567001	-5.09619
F1M049	Atxn2	0.539522	-0.262795	1.34184	16.7904	1.34482	0.183692	0.453173	0.567679	-5.046
F1LSG8	Ccdc132	-0.458469	-1.14017	0.223228	15.8469	-1.3437	0.183817	0.453173	0.567687	-5.08339
D3ZYX8	Cox7a2l	0.420717	-0.205184	1.04662	18.2963	1.34144	0.184264	0.453173	0.568253	-5.10117
P32232-2	Cbs	-0.176327	-0.438683	0.0860286	18.4568	-1.34127	0.18432	0.453173	0.568253	-5.10139
D3ZDU5	Pfn2	-0.571464	-1.42224	0.279311	17.5225	-1.34162	0.184415	0.453173	0.568398	-5.10093
Q641Y2	Ndufs2	-0.176156	-0.438506	0.0861936	20.3666	-1.34	0.18473	0.453387	0.568929	-5.10295
F1LN92	Afg3l2	0.215544	-0.105912	0.537001	17.3855	1.33814	0.185332	0.454305	0.570195	-5.10524
D4ADD8	Dctn6	0.409445	-0.201675	1.02057	17.4534	1.33744	0.185626	0.454464	0.570705	-5.10604
A0A0G2K2L8	Cask	-0.23755	-0.592428	0.117327	17.3042	-1.33587	0.186069	0.454989	0.570842	-5.10803
A0A096MJG7	LOC102554591	0.129261	-0.0642228	0.322746	19.0684	1.33325	0.186924	0.456518	0.572014	-5.11126
Q5EGY4	Ykt6	-0.318365	-0.795749	0.159019	16.7031	-1.33202	0.18753	0.457135	0.572291	-5.10148
B5DFG5	Sept6	0.128378	-0.0641169	0.320874	19.0571	1.33094	0.187678	0.457135	0.572291	-5.11408
Q01728-2	Slc8a1	-0.147409	-0.368536	0.0737177	18.0955	-1.33036	0.187867	0.457135	0.572291	-5.11479
F1LPG9	Fam21c	0.392408	-0.197191	0.982008	17.1271	1.32934	0.18841	0.457896	0.572574	-5.11587
D4ABM3	Daam1	-0.267619	-0.670391	0.135152	16.6892	-1.32601	0.189298	0.459494	0.573084	-5.12011
F7EYB9	Omg	-0.175592	-0.440859	0.0896747	18.6967	-1.32102	0.190947	0.462624	0.575766	-5.12619
Q6AXU6	Hn1	0.300217	-0.153431	0.753864	19.7841	1.3207	0.191054	0.462624	0.575766	-5.12658
F1LX07	Slc25a12	-0.274269	-0.689272	0.140735	20.4529	-1.3189	0.191652	0.463508	0.576986	-5.12877
Q2I6B2	Atp6v0a1	0.0842341	-0.043673	0.212141	21.2135	1.31426	0.1932	0.466243	0.578643	-5.13439
P54311	Gnb1	-0.0922111	-0.232248	0.0478255	22.5649	-1.3141	0.193252	0.466243	0.578643	-5.13458
A0A0G2JVL6		-0.155836	-0.392819	0.0811466	19.9053	-1.31231	0.19385	0.467051	0.578705	-5.13674
P62076	Timm13	0.136359	-0.0711832	0.343902	19.1372	1.31119	0.194229	0.467051	0.578705	-5.1381
F1M779	Cltc	-0.142802	-0.360181	0.0745775	22.5511	-1.311	0.194292	0.467051	0.578705	-5.13833
A0A096MJY6	Gbe1	0.402817	-0.211874	1.01751	18.2544	1.31193	0.194744	0.467574	0.578714	-5.12309
P11661	Mtnd5	-0.331952	-0.838224	0.174319	18.1694	-1.30852	0.195127	0.467928	0.579395	-5.14132
D4A9P7	LOC100363408	0.29534	-0.157332	0.748013	17.457	1.30204	0.197318	0.472482	0.580533	-5.14911
Q7TQ16	Uqcrq	0.143793	-0.0768419	0.364428	19.8642	1.30062	0.197802	0.472482	0.580533	-5.15081
Q7TQ94-2	Nit1	0.103942	-0.0555651	0.26345	18.2612	1.30046	0.197856	0.472482	0.580533	-5.151
P12368	Prkar2a	0.117231	-0.0627429	0.297206	18.446	1.29993	0.198037	0.472482	0.580533	-5.15164
E9PSK7	Mapk8ip3	0.12654	-0.0678024	0.320882	17.7757	1.29941	0.198214	0.472482	0.580711	-5.15226
F1LNK0	Map2	-0.0823248	-0.208992	0.0443428	21.5478	-1.29703	0.199026	0.473849	0.581214	-5.1551
P23978	Slc6a1	-0.238655	-0.606906	0.129597	20.7171	-1.29334	0.200293	0.476296	0.583276	-5.15951
G3V9J7	Rabep1	0.140953	-0.0767716	0.358677	16.9012	1.29197	0.200764	0.476844	0.584207	-5.16114
P14841	Cst3	0.288176	-0.157498	0.733849	21.2148	1.29041	0.201303	0.477553	0.584213	-5.163
P60901	Psma6	0.142329	-0.0781586	0.362817	18.3597	1.28824	0.202052	0.47876	0.585397	-5.16558
A0A0G2K1L5	Reep2	-0.333892	-0.851496	0.183711	17.5859	-1.28735	0.20236	0.47892	0.585933	-5.16664
Q8R431	Mgll	0.134102	-0.0740499	0.342254	19.2882	1.28571	0.20293	0.479668	0.586701	-5.16859
Q09167	Srsf5	0.275382	-0.152317	0.703082	17.9326	1.28494	0.203194	0.479668	0.586853	-5.16949
M0RC65	Cfl2	-0.181169	-0.462928	0.10059	19.4091	-1.28319	0.203803	0.479668	0.587332	-5.17156
A0A0G2K1L8		-0.345656	-0.883515	0.192203	22.1764	-1.28251	0.20404	0.479668	0.587779	-5.17236
G3V849	Dlgap1	-0.167322	-0.427819	0.0931756	17.581	-1.28185	0.204273	0.479668	0.587779	-5.17315
Q9WUC4	Atox1	-0.20332	-0.519865	0.113224	17.1196	-1.28184	0.204277	0.479668	0.587779	-5.17317
D3ZYH3	LOC100912928	-0.290629	-0.743407	0.162149	16.8166	-1.28132	0.204521	0.479668	0.588263	-5.17375
D3ZFQ8	Cyc1	-0.172646	-0.441633	0.0963412	20.8489	-1.28089	0.204607	0.479668	0.588368	-5.17429
Q4V8H5	Dnpep	-0.178146	-0.456567	0.100274	18.3978	-1.27691	0.205999	0.482362	0.59003	-5.17897
O08618	Prpsap2	-0.131381	-0.337029	0.0742673	17.9896	-1.27495	0.206688	0.482995	0.591075	-5.18128
Q5U2T9	Fkbp5	0.411237	-0.232952	1.05543	16.4106	1.27469	0.206911	0.482995	0.591394	-5.18154
B2GV15	Dbt	-0.280621	-0.720176	0.158933	17.323	-1.27407	0.206998	0.482995	0.591394	-5.18231
P54921	Napa	-0.187149	-0.481015	0.106718	19.6626	-1.27094	0.208105	0.485009	0.592738	-5.186
B1H2A6	Fxr2	-0.310977	-0.801087	0.179132	16.1667	-1.27027	0.209092	0.48674	0.593681	-5.14767
A0A0G2JZK7	Slc8a2	0.14764	-0.0848243	0.380103	19.9285	1.26746	0.209337	0.48674	0.593952	-5.19007
Q5RJR9	Serpinh1	-0.251992	-0.649012	0.145029	16.9986	-1.26666	0.209621	0.48683	0.594475	-5.191
D3ZNQ6	Ube2m	0.171544	-0.0991236	0.442212	18.3318	1.26481	0.210279	0.487348	0.59467	-5.19316
Q62952	Dpysl3	-0.115869	-0.298713	0.066975	20.0118	-1.26466	0.210334	0.487348	0.59467	-5.19334
F1MAH8	Clip1	-0.242168	-0.62481	0.140474	16.6509	-1.26302	0.210917	0.48813	0.595461	-5.19525
A0A0G2K7R8	Slc44a1	-0.255654	-0.66039	0.149082	17.9205	-1.26057	0.211795	0.489389	0.597134	-5.1981
Q6P4Z9	Cops8	0.290508	-0.169876	0.750893	18.5422	1.25929	0.212255	0.489389	0.597687	-5.19959
P11232	Txn	-0.266057	-0.687945	0.155831	20.2998	-1.25887	0.212468	0.489389	0.597857	-5.20005
F1LRZ7	Nefh	0.201071	-0.118192	0.520333	21.0275	1.25686	0.213126	0.489389	0.598211	-5.20241
G3V7U2	Map1a	0.0590467	-0.0347434	0.152837	20.8952	1.25639	0.213295	0.489389	0.598211	-5.20295
O35814	Stip1	-0.141462	-0.366239	0.083314	19.515	-1.25596	0.21345	0.489389	0.598223	-5.20345
P62260	Ywhae	-0.200103	-0.518203	0.117996	22.7208	-1.25539	0.213657	0.489389	0.598518	-5.20412
A0A0G2JW34		-0.328024	-0.850726	0.194679	15.7667	-1.25783	0.213802	0.489389	0.598544	-5.14763
A0A0G2QC17	Pdp1	-0.304962	-0.79004	0.180116	16.9209	-1.25499	0.213866	0.489389	0.598544	-5.20455
P50475	Aars	-0.111338	-0.288432	0.0657569	18.5311	-1.25465	0.213923	0.489389	0.598563	-5.20497
F7F2F3		0.119991	-0.0712513	0.311233	19.4821	1.25214	0.214833	0.48959	0.599323	-5.20788
D3ZY47	RGD1559896	-0.157108	-0.407533	0.0933177	17.7424	-1.252	0.21488	0.48959	0.599323	-5.20803
P04797	Gapdh	-0.0877364	-0.227607	0.0521344	24.4974	-1.25181	0.21495	0.48959	0.599323	-5.20825
P0C5H9	Manf	0.279357	-0.166044	0.724757	16.7943	1.25169	0.214996	0.48959	0.599323	-5.2084
P62282	Rps11	0.134277	-0.0802548	0.34881	19.3717	1.2491	0.215934	0.491164	0.600948	-5.21139
D4A830	Ppa2	-0.153398	-0.398664	0.091868	17.9606	-1.24816	0.216277	0.491382	0.601482	-5.21247
Q4KM65	Nudt21	-0.437638	-1.13893	0.263655	16.1722	-1.24933	0.216595	0.491543	0.601525	-5.13422
D3ZAA9	Mpp2	0.138303	-0.083986	0.360593	18.4494	1.24165	0.218653	0.495646	0.604564	-5.21995
Q68FX3	Ddx19a	0.240346	-0.147095	0.627786	16.9397	1.23833	0.219939	0.497993	0.605599	-5.22373
Q9JKB7	Gda	-0.133118	-0.347934	0.081697	20.5678	-1.23669	0.22048	0.498433	0.606937	-5.22563
Q5PQN0	Ncald	-0.35038	-0.915985	0.215225	17.6772	-1.23627	0.220635	0.498433	0.606997	-5.22611
P30349	Lta4h	-0.090428	-0.236584	0.0557282	18.5923	-1.23473	0.221203	0.49915	0.607364	-5.22786
P19511	Atp5f1	-0.30499	-0.798426	0.188446	20.6986	-1.23351	0.221656	0.499605	0.607554	-5.22926
P02401	Rplp2	-0.26197	-0.686067	0.162127	20.2142	-1.23274	0.221939	0.499676	0.608151	-5.23013
P04692-5	Tpm1	0.116106	-0.0726269	0.304839	20.1063	1.2277	0.223813	0.503327	0.611722	-5.23586
Q497B0	Nit2	0.31175	-0.195659	0.819158	17.3989	1.22753	0.224145	0.503503	0.611808	-5.21326
P11951	Cox6c2	0.144649	-0.0908673	0.380165	22.21	1.22569	0.224565	0.503878	0.612675	-5.23814
A0A140TAA1		-0.113498	-0.298627	0.0716309	18.8852	-1.22349	0.225389	0.505156	0.61366	-5.24063
Q6RJR6	Rtn3	-0.120496	-0.31736	0.0763672	20.0917	-1.22151	0.226135	0.506257	0.614498	-5.24287
A0A0G2JZM8	Clasp2	-0.179651	-0.473677	0.114375	18.4071	-1.21936	0.226943	0.507061	0.615922	-5.24529
A0A0U1RRS7	Mapk10	-0.11546	-0.304562	0.0736432	18.0599	-1.21848	0.227274	0.507061	0.616351	-5.24628
P62250	Rps16	0.171954	-0.109811	0.45372	19.1488	1.2179	0.227494	0.507061	0.616351	-5.24694
Q5XI64	Abhd6	-0.373074	-0.984508	0.238359	16.0839	-1.21801	0.227514	0.507061	0.616351	-5.24678
P85845	Fscn1	0.0963121	-0.0617511	0.254375	19.8204	1.21601	0.228208	0.508038	0.61701	-5.24906
P20059	Hpx	-0.326929	-0.864028	0.21017	17.1033	-1.21508	0.228623	0.508393	0.617569	-5.25007
O08700	Vps45	-0.249436	-0.660074	0.161202	16.9865	-1.21224	0.22964	0.510082	0.618493	-5.2533
Q5U1Z9	Mtx2	-0.186286	-0.493195	0.120622	18.2459	-1.21132	0.229988	0.510285	0.618974	-5.25432
D4A9D8	Osbp	-0.340346	-0.90195	0.221258	16.9966	-1.20942	0.230712	0.511321	0.619385	-5.25645
P63029	Tpt1	-0.255156	-0.676851	0.166539	18.8932	-1.20752	0.231437	0.512027	0.620355	-5.25857
G3V803	Cdh2	0.230409	-0.150476	0.611294	18.096	1.20724	0.231546	0.512027	0.620484	-5.25889
D4A6P1	Sez6l2	0.22159	-0.146193	0.589373	17.0662	1.20239	0.233405	0.515157	0.621657	-5.26429
Q9ER24	Atxn10	-0.193636	-0.515197	0.127926	17.6251	-1.20173	0.233657	0.515157	0.621695	-5.26502
D4A3V2	Ndufa6	-0.115488	-0.307307	0.076331	18.8617	-1.20152	0.233738	0.515157	0.621773	-5.26525
G3V6R5	Suox	0.35025	-0.232073	0.932573	16.9301	1.20033	0.234198	0.515599	0.622053	-5.26658
Q64548-2	Rtn1	-0.535204	-1.42795	0.357542	18.0603	-1.19892	0.235222	0.51728	0.622802	-5.18346
F1MAA3	LOC100909464	-0.230034	-0.613849	0.153781	17.8136	-1.19607	0.235844	0.518076	0.623175	-5.2713
[truncated: 1,083 more rows]

## Sheet: sheet_6
protein_ids	gene_symbol	log_fc	ci_l	ci_r	ave_expr	t	p_value	adj_p_val	global_adj_p_val	b
[truncated: 1,988 more rows]

[truncated: 7 more sheets: sheet_7, sheet_8, sheet_9, sheet_10, sheet_11, sheet_12, sheet_13]
