# Supplementary material for: Rasal1: A candidate exercise mimetic to increase adult hippocampal neurogenesis in middle age
Source: Research Square preprint supplement (doi:10.21203/rs.3.rs-8394751/v1), 2026-02-13
Supplement: Supplementary file 4 [file 4b34dc40b387d40e27501843.docx]

**Supplementary Information for**

**Rasal1: A candidate exercise mimetic to increase adult hippocampal neurogenesis in middle age**

Maria Giovanna Caruso, Sebastian Dohm-Hansen, Sarah Nicolas, Jane A. English, Aonghus Lavelle, Paul J. Lucassen, Joram D. Mul, Olivia F. O’Leary, Yvonne M. Nolan

Yvonne M. Nolan

Email: [y.nolan@ucc.ie](mailto:y.nolan@ucc.ie)

This file contains:

- Supplementary methods
- 4 Supplementary figures
- 2 Supplementary tables

**Supplementary methods**

***In vivo studies***

*Animals and experimental design*

Adult (12 weeks old) and middle-aged (12 months old) male Sprague Dawley rats were obtained from Janvier Laboratories (France). All animal procedures were performed under authorizations (#AE19130/P149) issued by the Health Products Regulatory Authority (HPRA, Ireland), in accordance with the European Communities Council Directive (2010/63/EU) and approved by the Animal Experimentation Ethics Committee of University College Cork. Upon arrival, animals were pair-housed in a colony maintained at 22±1 °C with a 12-hour light-dark cycle (lights on at 7:30 am) with *ad libitum* access to standard chow (Envigo, UK) and tap water.

*Exercise paradigm*

Multiple independent cohorts were used to assess the central and systemic effects of voluntary wheel running in adult and middle-aged rats (**Supplementary** **Dataset 5**). In the discovery cohorts, 20 young adult (Y) and 20 middle-aged (MA) male rats were pair-housed in either standard cages (Y-SED, MA-SED) or with free access to a running wheel (Activity wheel 33cm diameter, Techniplast, UK) (Y-EX, MA-EX). Similarly, in the validation cohort, 20 adult male rats were pair-housed in either standard cages (Y-SED) or with free access to a running wheel (Y-EX), while 20 middle-aged male rats were kept in standard housing conditions (MA-SED). Upon arrival, rats were pair-housed in standard cages and allowed to habituate to the new colony for two weeks. In all the cohorts, running or sedentary conditions were maintained for the duration of the experiment, which lasted a total of 6 to 8 weeks (**Supplementary** **Dataset 5**). Body weight was measured twice weekly. The number of wheel revolutions was automatically recorded by sensors and software connected to the wheel. Running activity was measured as the number of wheel revolutions over 24 hours and expressed as distance run per day (km/day or m/day).

*Stereotactic brain surgery*

Two independent cohorts of male, middle-aged rats were used to assess the effects of Rasal1 downregulation in the dorsal hippocampus (**Supplementary** **Dataset 5**). Rats were anaesthetized with isoflurane/O2 (3/1.5 %) and bilaterally, stereotactically infused with 3.0 µL of ultra-purified lentiviral-based short-hairpin RNA vectors (shRNA targeting rat Rasal1 >1x108 IU mL-1 or scrambled control >1x108 IU mL-1 ) into the dorsal hippocampus (from bregma: A.P. = -3.5, M.L. = +-2.4, D.V. = -3.6) at 1µl/min. Lentiviral particles were purchased from Genecopoeia (shRNA catalog no. ULP-RSH083897-LVRU6GP-a-200 - Lot no. GC04132K2201; scrambled control catalog no. ULP-CSHCTR001-LVRU6GP-200 - Lot no. GC04012H2201). The shRNA contained a construct designed to silence Rasal1 expression via RNA interference driven by a U6 promoter (LVshRASAL1), while the scrambled control contained a non-silencing sequence (LVSCR) driven by the same promoter (Genecopoeia, Rockville, MD, USA). Both vectors carried eGFP reported gene clones driven by SV40 and IRES promoters. qPCR analysis for the expression of the LVSCR and LVshRASAL1 viral vector transcripts was carried out in the dorsal hippocampus to further confirm the successful lentiviral transduction. Rats not expressing the viral vector in the dorsal hippocampus were removed from analysis (LVSCR n = 3, LVshRASAL1n = 3). Additionally, because Ras signalling may be linked to tumor proliferation (1), we screened all rats for tumors. Only one case was observed, and this animal was excluded from all main analyses.

*Tissue collection*

Rats were culled by decapitation, and the DG or dorsal/ventral hippocampi were collected. White adipose tissue was also collected from rats in the discovery cohort. All tissues were snap-frozen in liquid nitrogen and stored at -80°C until further analyses.

In separate cohorts, rats were euthanized with an intraperitoneal injection of sodium pentobarbital (90 mg/Kg). Rats were transcardially perfused with ice-cold PBS followed by ice-cold 4% paraformaldehyde (PFA). Brains were removed and post-fixed in 4% PFA overnight, equilibrated in 30% sucrose, and snap-frozen under liquid nitrogen and stored at -80°C. In the validation cohort, after transcardial perfusion with ice-cold PBS, brains were removed, and the right hemisphere was dissected for dentate gyrus collection. The left hemisphere was post-fixed in 4% PFA, then equilibrated in 30% sucrose, snap-frozen, and stored at -80°C.

*Blood collection*

Trunk blood was collected, incubated for 20 minutes at room temperature, and then centrifuged for 10 minutes at 1,500 x g at 4°C to isolate the serum samples, which were then stored at -80°C.

***Proteomics***

*Brain samples*

DG samples were thawed on ice before sonication at 20% amplitude in 150μl lysis buffer (8M proteomics-grade urea, VWR; 1M triethylammonium bicarbonate, TEAB, Sigma; cOmplete ULTRA mini protease inhibitor, Roche). Homogenates were subsequently centrifuged at 4°C at 15,000 x g for 10 minutes, and the supernatants were collected. Protein concentrations were estimated by PierceTM BCA Protein Assay Kit (Thermo Scientific, Ireland), and 50μg protein was normalized in 0.1M TEAB buffer. Samples were reduced with dithiothreitol (DTT, final concentration 9mM) for 1 hour at 37°C and then alkylated with iodoacetamide (IAA, final concentration 12mM) for 30 minutes at room temperature in the dark. Excess IAA was subsequently quenched with DTT to a final stoichiometric ratio of 1:1. Samples underwent overnight (16-hour) digestion with trypsin at a ratio of 1:50 (trypsin:protein) at 37°C under 350 rpm agitation. Digestion was stopped by adding formic acid (FA) to a final concentration of 1% (pH <4). Digests were dried down by vacuum centrifugation at 60°C for 3 hours, followed by resuspension in 0.5% trifluoroacetic acid (TFA). Finally, all samples were desalted using C18 ZipTipTM column tips, dried down at 60°C in a vacuum centrifuge, and resuspended in 20μl 0.1% FA to a final concentration of 0.1-0.25μg/μl. Samples were stored at -80°C prior to mass spectrometry analysis.

#### Serum samples

Rat serum samples were depleted of serum albumin, transferrin, and immunoglobulin G (IgG) with a 4.6x100 mm Mouse-3 Multi Affinity Removal Column (Agilent) for high-performance liquid chromatography (HPLC). The column was connected to an Äkta Purifier (GE Healthcare/Amersham Biosciences) HPLC system, running with Unicorn software (version 5.31). Prior to loading, all samples were diluted 5X in buffer A (10mM Phosphate-buffered saline, PBS, Sigma) with protease inhibitor (Sigma) and filtered through 0.22μm spin filters (Agilent) for three minutes at 16,000 x g to remove particulate matter. Samples were loaded onto the column at a flow rate of 0.5 ml/min. Flow-through fractions were collected at a UV threshold of 5mAU over 10 minutes. Bound proteins were eluted with buffer B (0.5M glacial acetic acid, Sigma) at a flow rate of 1.0 ml/min for 7 minutes, using a UV threshold of 5 mAU. The column was then regenerated with buffer A at a flow rate of 1 ml/min for 11 minutes. Sample concentration and buffer exchange (to 50mM Ammonium Bicarbonate, Sigma) were performed on collected fractions using Amicon Ultra-2 Centrifugal Units (Sigma) with a 10kDa nominal molecular weight limit, based on the manufacturer’s instructions (centrifugation at 3,220 x g for 40 minutes at 20°C). Finally, protein concentrations were determined with PierceTM BCA Protein Assay Kit (Thermo Scientific).

Fifty micrograms of serum protein was normalized in 50mM ammonium bicarbonate to a final concentration of 1 mg/ml prior to solubilization with RapigestTM surfactant (Waters): a 0.5% Rapigest solution (dissolved in 50mM ammonium bicarbonate) was added to all samples, followed by incubation at 80°C for 10 minutes under 350rpm agitation. Samples were then reduced with DTT (final concentration 5mM) for 30 minutes at 60°C, followed by alkylation with IAA (final concentration 15mM) for 30 minutes at room temperature in the dark (both carried out under agitation). Excess IAA was quenched with DTT to a final stoichiometric ratio of 1:1. Samples underwent overnight (16-hour) digestion with reconstituted Promega sequencing-grade porcine trypsin (MyBio, Ireland) at a ratio of 1:50 (trypsin:protein) at 37°C under 350 rpm agitation. Digestion was stopped by adding 5μl 10% FA (final concentration ~0.5%), and Rapigest was precipitated by incubation at 37°C for 45 minutes under 350 rpm agitation, followed by centrifugation at 17,949 x g and 4°C for 10 minutes. The supernatants were then dried down for up to 100 minutes at 60°C and resuspended in 50µl 0.5% TFA. Finally, all samples were desalted using C18 ZipTipTM column tips, dried down at 60°C in a vacuum centrifuge, and resuspended in 20µl 0.1% FA to a final concentration of approximately 0.25µg/µl. Samples were stored at -80°C prior to mass spectrometry analysis.

#### Trapped Ion Mobility Spectrometry-Time of Flight (TIMS-TOF)

Samples were analyzed by liquid chromatography-coupled tandem mass spectrometry (LC-MS/MS) analysis on a timsTOF Pro mass spectrometer (Bruker Daltonics, Bremen, Germany) coupled to an EvoSep One liquid chromatography system (EvoSep BioSystems, Odense, Denmark). Analysis was carried out at the Conway Institute, University College Dublin.

Samples were loaded onto C18 EvoTip disposable trap columns and run on a timsTOF Pro mass spectrometer coupled to the EvoSep One system. The peptides were separated on a reversed-phase C18 Endurance column (15cm x 150μm ID, C18, 1.9μm, EV-1106) using either the pre-set Extended 15 SPD method (brain samples) or 30 SPD method (serum samples). Mobile phases were 0.1% (v/v) formic acid in water (phase A) and 0.1% (v/v) formic acid in acetonitrile (phase B). The peptides were separated by an increasing gradient of mobile phase B at 220nL/min (discovery cohort brain samples) or 500nL/min (discovery cohort serum samples and validation cohort brain samples) for 44 minutes (serum samples) or 88 minutes (brain samples).

For data-dependent acquisition (DDA), the timsTOF Pro mass spectrometer was operated in positive ion polarity with TIMS (Trapped Ion Mobility Spectrometry) and PASEF (Parallel Accumulation Serial Fragmentation) modes enabled (2,3). The accumulation and ramp times for the TIMS were both set to 100 milliseconds, with an ion mobility (1/k0) range from 0.6 to 1.60 V/cm2. Spectra were recorded in the mass range from 100 to 1,700 m/z. The precursor (MS) Intensity Threshold was set to 2,500, and the precursor target intensity was set to 20,000. Each PASEF cycle consisted of one MS ramp for precursor detection followed by 10 PASEF MS/MS ramps, with a total cycle time of 1.17 seconds.

For data-independent acquisition (DIA), a diaPASEF scheme consisting of either 44(validation cohort brain samples) or 52 (discovery cohort serum samples) precursor isolation windows of 25 m/z width, covering a mass range of either 300-1400 m/z (validation cohort brain samples) or 300-1600 m/z (discovery cohort serum samples), and an ion mobility range of 0.6 to 1.6 Vs/cm, was created using the Bruker timsControl interface (version 2.0.53).

#### Data processing

The mass spectrometry data were searched against the UniProtKB/Swiss-Prot *Rattus norvegicus* reference proteome (proteome UP000002494 10116) using either MaxQuant (discovery cohort brain samples) or FragPipe (discovery cohort serum and validation cohort brain samples). All searches were performed at the Conway Institute, University College Dublin.

MaxQuant (version 2.0.3.0) (4) was run with default settings, including “trypsin/P” as the digestive enzyme (i.e. cleaving at lysine and arginine, unless followed by a proline residue, which is the mode of digestion of the Promega Sequencing-grade trypsin used), a maximum allowed missed cleavages of 2, “match between runs” enabled, methionine oxidation and n-terminal acetylation as default variable modifications, and cysteine carbamidomethylation as default fixed modification (as a result of reduction and alkylation). Running MaxQuant with default parameters is recommended, as they have been optimized to cover most use cases (4). Additionally, MaxQuant was run with the well-established MaxLFQ algorithm (5) for label-free quantification.

FragPipe (version 19.1) was run with the “DIA_SpecLib-quant” workflow (6), using the built-in DIA-NN (version 1.8.2) (7), MSFragger (version 3.7) (8,9), IonQuant (version 1.8.10) (9), and Philosopher (version 4.8.0) (10) modules. Default parameter settings were used, including the same trypsin digestion rule as for MaxQuant, a maximum number of missed cleavages of 1, methionine oxidation, and N-terminal acetylation as default variable modifications, and cysteine carbamidomethylation as default fixed modification. The MaxLFQ algorithm was run within the IonQuant module of FragPipe to produce normalized protein group intensities (LFQ) for downstream differential expression analysis results.

***Metabolomics***

Frozen aliquots of serum samples from Y-SED (n = 10), Y-EX (n = 10), and MA-SED (n = 10) rats from the discovery cohort study were analyzed by untargeted metabolomics by MS-Omics (Vedbaek, Denmark). The analysis was carried out using a Thermo Scientific Vanquish LC coupled to a Thermo Q Exactive HF MS. An electrospray ionization interface was used as the ionization source. Analysis was performed in negative and positive ionization modes. The UPLC was performed using a slightly modified version of the protocol described by Catalin et al. (UPLC/MS Monitoring of Water-Soluble Vitamin Bs in Cell Culture Media in Minutes, Water Application note 2011, 720004042en). Peak areas were extracted using Compound Discoverer 3.1 (Thermo Scientific). Identification of compounds was performed at four levels: Level 1: identification by retention times (compared against in-house authentic standards), accurate mass (with an accepted deviation of 3ppm), and MS/MS spectra, Level 2a: identification by retention times (compared against in-house authentic standards), accurate mass (with an accepted deviation of 3ppm). Level 2b: identification by accurate mass (with an accepted deviation of 3ppm), and MS/MS spectra, Level 3: identification by accurate mass alone (with an accepted deviation of 3ppm).

***Bioinformatics***

*Proteomics*

Identified protein groups and LFQ intensity values generated by MaxQuant (ProteinGroups.txt) and Fragpipe (diann-output.pg_matrix.tsv) were imported into R Studio for differential expression (DEA) and pathway analysis using R (version 4.1.1). In the case of MaxQuant-generated data (discovery cohort brain samples), protein groups flagged as contaminants and reverse hits (i.e. likely false hits), and protein groups identified solely on the basis of a modified peptide, were filtered out, as recommended (11). In the case of Fragpipe-generated data (discovery cohort serum and validation cohort brain samples), protein groups flagged as contaminants (i.e. containing the string “contam” in the protein group name) or deriving from organisms other than *Rattus norvegicus* were filtered out. Protein groups were filtered for a maximum per-group missingness of 25% (taking all experimental covariates into account). Additionally, residual albumin and immunoglobulin(-like) protein groups were filtered out from the serum data. All protein group LFQ values were log2-transformed. To address variable sample quality during DEA, the “arrayWeights” function in *limma* was run with the “reml” method to generate sample quality weights, taking experimental design into account. The parameter “n.prior” was set to be equal to the number of protein groups in the brain datasets, as this was found to stabilize quality weights (i.e. mainly down-weighting poor quality samples). To address expression heterogeneity (i.e. unknown variance structures unrelated to experimental covariates), the *sva* package was used to estimate “surrogate variables” for use as technical covariates in the DEA. The “sva” function was run with the “leek” method and the number of variables estimated by the “num.sv” function, taking the experimental design into account and using a null model consisting only of an intercept term. Additionally, due to the lower number of protein groups in the serum proteomics dataset, and because *sva* does not allow for missingness, missing values were first imputed using the hybrid approach (12) in the *ImputeLCMD* package, with “KNN” and “QRLIC” as input arguments for the MAR and MNAR missingness parameters, respectively (note that DEA was not performed on imputed data). DEA was conducted using the *limma* package by fitting the matrix of filtered and transformed LFQ values to the experimental design (including surrogate variables as covariates), incorporating the quality weights, using the “lmFit”, “contrasts.fit”, and “eBayes” functions. The latter was run with “trend=TRUE” to account for the mean-variance trend and “robust=TRUE” in case of the validation cohort brain samples to account for hyper-/hypovariable protein groups. To account for the paired dorsal and ventral dentate gyrus samples in the discovery cohort, the function “duplicateCorrelation” in *limma* was run with individual rat ID as a blocking variable, and the within-sample consensus correlation was included in the “lmFit” function call, with rat ID as a blocking variable. Protein groups were considered differentially expressed (DEP) at a Benjamini-Hochberg-adjusted false discovery rate (FDR) of <.05. Additionally, a global FDR was calculated to account for differences in the number of contrasts across datasets. This was computed by adjusting the full vector of all nominal *p*-values per dataset using the “p.adjust” function with “method=’FDR’”.

Protein groups at the nominal *p* < .05 level were used for pathway enrichment analyses with the R packages “*WebGestaltR*” and “*enrcihR*”. Over-representation analysis (ORA) with the species-specific (i.e. *R. norvegicus*) Gene Ontology (GO) and Kyoto Encyclopedia of Genes and Genomes (KEGG) databases was conducted with *WebGestaltR*. For GO, the non-redundant versions of all three subsets of “biological process”, “molecular function”, and “cellular component” were used. Gene symbols were used rather than UniProt/SwissProtKb identifiers, as the latter often display considerable redundancy, whereby many UniProt IDs map to one gene. Accordingly, "genome_protein-coding" was used as the reference set. Minimum and maximum allowed gene set sizes were set at 20 and 500, respectively. Finally, *p*-values were adjusted with the Benjamini-Hochberg method, and a threshold of FDR < 0.05 was set for significance. Additional ORAs were conducted with the R package “enrichR” using gene symbols of nominal DEPs. The following gene sets were included: "MSigDB_Hallmark_2020", "Aging_Perturbations_from_GEO_up", "Aging_Perturbations_from_GEO_down", "PPI_Hub_Proteins". Gene sets were considered significant at the FDR < 0.05 level. For plotting purposes, if an enriched pathway had FDR = 0, its FDR was set to 1/10 of the lowest non-zero FDR to prevent taking the logarithm of zero.

*Metabolomics*

Metabolomics methods were provided and performed by Dr. Sebastian Dohm-Hansen.

Analysis was conducted as previously reported (13,14). DEA was performed on both annotated and unannotated metabolite features. Raw feature peak area values below their associated limit of detection (as reported by MsOmics) were considered missing (*i*.*e*. set to “NA”), and only features with a maximum of 25% missingness per condition were retained for quantification. Additionally, to remove features displaying high technical variance, only metabolites with <10% relative standard deviation in the pooled quality control samples were retained. We also filtered out a small subset of low-abundant, hypovariable features that ended up skewing the fitted mean-variance trend (expected to be quadratic) in *limma* in order to maintain consistency with the proteomics analysis. Data were subsequently normalized with variance stabilizing normalization (VSN), using the “vsn” package (with the default 10% outlier tolerance). Sample quality weights and surrogate variables (estimated with “arrayWeights” and “sva”, respectively) were estimated and included in the “lmFit” model as described above. The “eBayes” function was run with “trend=TRUE” and “robust=TRUE”. Metabolite features were considered differentially abundant at the FDR < .05 level.

Features significant at the nominal *p* < .05 level with valid HMDB (Human Metabolome Database) identifiers were used for pathway ORA with the “*ClusterProfiler*” package. Species-specific (*i*.*e*. *R. norvegicus*) KEGG pathways (including associated small chemical compound identifiers) were downloaded by Python calls to the KEGG REST API (<https://rest.kegg.jp>). The full HMDB metabolites database was downloaded from hmdb.ca and used to map HMDB identifiers to KEGG pathway identifiers. The full set of species-specific KEGG pathways with annotated small chemical compounds was used as the background gene set. The general-purpose “enricher” function in *ClusterProfiler* was used to conduct Fisher’s exact test to assess pathway over-representation. Minimum and maximum allowed gene set sizes were set at 20 and 500, respectively, and pathways were considered significantly enriched at the FDR < .05 level.

*Multi-omic factor analysis (MOFA)*

Proteomic (filtered log2-transformed LFQ values) and metabolomic (un-/annotated, filtered VSN-transformed peak areas) data from the common subset of serum samples (i.e. MA-SED, Y-SED, and Y-EX) were used for multi-omic factor analysis with MOFA2. All data were standardized (z-transformed) prior to analysis with MOFA2, as recommended by the authors (15). The number of latent factors was optimized by comparing different parameterizations in terms of maximum ELBO value (the objective function) using the functions “compare_elbo” and “select_model”. To assess how well the final model's latent factors captured experimental variance, unsupervised *k*-means clustering was conducted using the “cluster_samples” function with *k* = 3 clusters (i.e. to reflect the three experimental groups: Y-SED, Y-EX, MA-SED) for all factors. To objectively compare clustering performance, the between-cluster sum of squares was divided by the total sum of squares for each factor clustering, and the factor with the highest percentage was selected.

*Multi-omic correlation analysis*

To assess relationships between brain and serum proteins and metabolites independent of experimental condition and technical factors, we regressed out the effect of the experimental design (including surrogate variables) from the expression values in each proteomics and metabolomics dataset in the discovery cohort. This was done by calling the “residuals” function in R on the *limma* “lmFit” object used for DEA (*i.e.* filtered, normalized, and log-transformed expression values). Pearson correlations between protein and metabolite features were then conducted on the residualized expression values using the “rcorr” function in R with the argument “type=pearson”. The nominal *p*-values were adjusted by Benjamini-Hochberg-based FDR using the “p.adjust” function in R with argument “method=BH”. Correlations were considered significant at the FDR < .05 level and nominally significant at the unadjusted *p* < 0.05 level. Pathway enrichment analysis was conducted as described above.

*Syndive Rasal1 expression analysis*

To query the expression of Rasal1 in the “syndive” synaptosomal proteomics dataset (16), we downloaded the full abundance and enrichment data from ​​<http://syndive.org/> (“abundance”, “enrichment”, and “info”) and imported it into R. We then filtered for “Rasal1” using the “gene” variable in the “info” dataframe and used the UniProt identifier to query its normalized expression and region-synapse type enrichment. The expression was then plotted for all brain regions and synaptosome types, and significant enrichment was highlighted using the R package *gghighlight*.

*Single-cell expression of Rasal1*

To query the single-cell expression profile of Rasal1 in the mouse dentate gyrus, we analyzed publicly available data from Wu et al. (17). Pre-processed 10X Chromium data were downloaded as a Seurat object from <https://zenodo.org/records/13893852> (seurat_Chromium_All.rds) and loaded into R. We then followed the same analysis steps conducted by the authors, as outlined in the script “scRNAseq-Neurogenesis.R” (<https://github.com/JessbergerLab/AgingNeurogenesis_Transcriptomics>). To visualize annotated cell subtypes, we used the “DimPlot” function in *Seurat* to plot the author’s pre-calculated UMAP dimension reduction. To visualize the expression of Rasal1 across cell subtypes and age groups (young, middle-aged, old), we used the “DotPlot” and “FeaturePlot” functions in *Seurat*. To recluster the data on neurogenesis-relevant cell types, we first subset the Seurat object on identities “qNSC”, “nIPC”, “Neuroblast”. Then, we performed log normalization with a scale factor of 10,000 using “NormalizeData”, followed by “FindVariableFeature” with parameter “n=5000”, “ScaleData” for standardization, and finally PCA and UMAP using “RunPCA” and “RunUMAP”, respectively. We plotted the re-clustered data with “DimPlot” and Rasal1 expression within these clusters using “FeaturePlot”, as above. The latter function was run with the default “feature” re-scaling parameter, which displays gene expression scaled to the maximum expression of the feature across groups (i.e. age) to ensure comparable scales.

*R packages*

For a complete list of R packages used in analyses, see **Supplementary Table 1**.

***Immunohistochemistry***

Fixed brains were sectioned coronally at 35 µm using a Leica CM1950 cryostat, collected free-floating in a series of eight in cryoprotectant (25% 0.1M PBS, 30% ethylene glycol, 25% glycerol, 20% dH2O), and stored at -20°C until immunohistochemical staining. Coronal sections containing the entire rostro-caudal length of the hippocampus were washed in 0.1M PBS (3x5min) and placed in blocking solution (10% donkey serum in 0.1 Triton X-100 in PBS (PBS-T) for 1 hour at room temperature. All antibodies were diluted in 1% donkey serum in 0.1 PBS-T. Sections were incubated in the primary antibody (rabbit anti-Ki67, GeneTex, GTX16667, 1:1000 - rabbit anti-DCX, Abcam, AB18723, 1:2000 - goat anti-GFP, Abcam, AB5450, 1:500 - rabbit anti-Rasal1, Abcam, AB214321, 1:200 - mouse anti-NeuN, Millipore, MAB377, 1:1000 - goat anti-DCX, Sant Cruz, NBP1-72042, 1:500 - rat anti-GFAP, Invitrogen, 13-0300, 1:500 - mouse anti-Olig2, Sigma, MABN50, 1:1000) overnight at 4°C. Sections were washed in 0.1M PBS (3x5min) to remove excess primary antibody and incubated in corresponding secondary antibody (Alexa Fluor 555, 594, or 488) for 2 hours at room temperature. Sections were washed again in 0.1M PBS (3x5min) and then incubated in DAPI (5mg/ml, 1:500000 in PBS) for 3 min to label the cell nuclei. To detect Rasal1 cellular localization, Rasal1 and the different cell markers were stained sequentially. Sections were mounted onto Superfrost Plus microscope slides, cover-slipped using Dako fluorescent mounting media, and stored in the dark at 4°C until imaging.

The DG was imaged using an Olympus BX53 or BX43 Upright Research Microscope at 10x magnification for Ki67 and DCX imaging in order to assess for AHN levels. The number of Ki67+ and DCX+ cells in the granule cell layer and sub-granular zone of the DG was counted manually using ImageJ, and experimenters were blinded to experimental groups. DG area (mm2) was measured using ImageJ on 10x magnification DAPI images, and cell counts were expressed as cells/mm2. The dorsal hippocampus (dHi) was defined as AP: -1.8 to -4.8 and the ventral hippocampus (vHi) as AP: -5.2 to -6.7 (18). Four to five dorsal and four ventral sections were analyzed. For the morphometric reconstructions of DCX+ cells, 20x magnification images were taken. Ten DCX+ cells in the dorsal DG per rat were analysed. DCX+ cells that exhibited vertically oriented dendrites that extended into the molecular layer were selected for analysis. Selected cells had minimal overlap with the dendrites of adjacent cells to unambiguously trace the dendritic tree. Dendritic arborization was manually traced using the NeuronJ plugin in ImageJ.

To visualize GFP+ cells in the dorsal and ventral hippocampus, the DG was imaged using an Olympus BX43 Upright Research Microscope at 10x magnification.

To assess Rasal1 cellular localization, images were obtained using the Olympus Fluoview FV10i confocal laser scanning microscope with a 60x water immersion objective. Stacks were prepared with a Z-step of 1mm (16 slices on average). Colocalization of cellular markers with Rasal1 was observed using ImageJ software.

Statistical analysis was carried out using R version 2023.06.1-524. Data were analysed using a two-tailed, unpaired Welch’s *t*-test using the “t_test” function from the *rstatix* package. Analysis of outliers was carried out in GraphPad Prism 10 using Grubbs’ outlier test (Alpha = 0.05). See **Supplementary Table 2** for further details on statistical analysis.

***Western blot***

Dorsal DG samples of Y-SED (n = 9), Y-EX (n = 10), and MA-SED (n = 9) (two Y-EX were excluded for technical reasons) were mixed at a 1:1 ratio (for a final protein concentration of 1.0μg/μl) with 2X sample loading buffer (62.5mM Tris-HCL, 20% Glycerol, 2% sodium dodecyl sulfate, 5% beta-Mercaptoethanol, 0.005% w/v Bromophenol Blue) and then incubated at 100°C for 5 minutes on a block heater (Stuart) to denature the proteins. Proteins were separated by mass using SDS-polyacrylamide gel electrophoresis (SDS-PAGE) by loading 20μg of protein on a 1.0mm 10% separation gel with a 10-well 5% stacker gel. Proteins were sized using a 20-120 kDa PierceTM Prestained Molecular Weight Ladder (Thermo Scientific, Ireland) loaded on each gel. Electrophoresis was run at 100V for 100 minutes in a Mini-PROTEAN Tetra Vertical Electrophoresis Cell (Bio-Rad, Accuscience, Ireland). Proteins were then transferred onto 0.2mm polyvinylidene difluoride (PVDF) membranes (Millipore) at 100V for 1 hour in a Mini Trans-Blot Module (Bio-Rad, Accuscience, Ireland). The relative protein transferred per well was estimated on each membrane colorimetrically using MemCodeTM Reversible Protein Stain (Fisher, Ireland), following the manufacturer’s instructions.

PVDF membranes were blocked in 5% Bovine Serum Albumin solution prepared in 0.1% TBS-T (Tris-buffered saline with Tween-20; Sigma, Ireland) for 1 hour at room temperature under agitation. Membranes were then incubated overnight (16 hours) at 4°C with a mouse anti-Rasal1 polyclonal antibody (Abnova #H00008437-B01P; Lot M4251) diluted 1:1000 in 0.1% BSA/0.05% TBS-T. The following day, the membranes were washed in 0.1% TBS-T prior to incubation with a Horseradish Peroxidase-conjugated goat anti-mouse secondary antibody (P0447, Dako) diluted 1:5000 in 0.1% BSA/0.05% TBS-T. Membranes were incubated with the secondary antibody for 90 minutes at room temperature under agitation and then washed. The Rasal1 protein was subsequently detected by chemiluminescence using the ECL Prime Western Blot Detection Reagents kit (Cytiva), imaged with a G:Box Chemi XR imaging system (Syngene), and Genesys software (version 1.2.3.0).

Images were analysed with GelAnalyzer (version 19.1). Total background intensity was extracted for each lane from the MemCodeTM stain as a proxy for total protein loaded. Background-corrected intensity peaks for the Rasal1 bands were extracted from the raw chemiluminescence images. As there were cross-gel effects for total protein and rasal1 intensities, the ratios of rasal1:total protein intensity were standardized (i.e. Z-scored) within gel to remove the confound. A two-tailed, unpaired Welch’s *t*-test was then run with the standardized ratios to test for significant (*p* < .05) differences in relative Rasal1 expression between groups. Nominal *p*-values were adjusted by Bonferroni correction. To estimate the protein fold-change, the average, total protein-corrected intensity value in each experimental group was divided by the young sedentary average. This ratio was calculated separately for each gel. A two-sided, one-sample *t*-test was performed to test whether the fold change (i.e. ratio) was significantly different from 1. Statistical analyses were performed in R using the “t_test” function from the *rstatix* package.

***In vitro studies***

*Animals*

Time-mated female Sprague Dawley rats were provided by the Biological Services Unit (University College Cork). Pregnancy was determined by the appearance of a vaginal plug, designated as embryonic day 0 (E0). Pregnant dams were delivered and sacrificed on E18 for the harvesting of embryonic tissue.

*Primary embryonic day 18 (E18) hippocampal culture*

Pregnant female Sprague Dawley rats at the E18 stage were anesthetized by Isoflurane (Duggan Veterinary, Ireland) and euthanized by subsequent decapitation. Embryos were harvested and immediately decapitated, and the heads were placed in a petri dish on ice containing sterile Hank’s Balanced Salt Solution (HBSS, Sigma, Ireland). All dissections were carried out with tools sterilized in 70% ethanol and rinsed in HBSS. Bilateral hippocampi were dissected out and collected in a 15 ml Falcon tube (Sarstedt, Ireland) containing HBSS and kept on ice. All tissue was pooled for one culture. Hippocampi were incubated with pre-warmed (37°C) Accutase (Sigma, Ireland) for enzymatic tissue dissociation and further mechanically dissociated by trituration with flame-polished glass Pasteur pipettes (Volac, Germany). Trituration was done until the cell suspension appeared homogeneous, which was then incubated at 37°C in a Steri-Cycler humidified incubator with 5% CO2 and 95% air (Thermo Scientific) for 10 minutes. The Accutase solution was then diluted at a 1:1 ratio to halt the enzymatic activity, followed by centrifugation at 100 x g for 5 minutes. The cell pellet was resuspended in pre-warmed (37°C) proliferation medium (Neurobasal, 1% Penicillin/Streptomycin, 1% GlutaMAX, 2% B-27, 20ng/ml EGF, 20ng/ml bFGF) and further mechanically dissociated by trituration with a 21G disposable needle and syringe (Sarstedt, Ireland).

Cells were seeded in T25flasks (Sarstedt, Ireland) at a density of 2x105 cells/mL in 5 mL proliferation medium, supplemented with pooled, sterile-filtered (0.22 μm PVDF membrane filter units, Millipore, Ireland) sera (0.1%) from young adult sedentary or exercising rats (discovery cohort). Cells were allowed to proliferate as neurospheres for 5 days *in vitro* (DIV) in a humidified incubator at 37°C under agitation on an orbital shaker (Grant-bio, UK) to facilitate selection of proliferative cells and ensure media flow to the neurosphere core. A half-media change (including growth factor replenishment) was done on DIV3. On DIV5, neurospheres were sized by light microscopy and harvested for gene expression analysis by quantitative real-time PCR (qRT-PCR). Prior to harvest, neurospheres were washed briefly with 37°C HBSS and then pelleted by sheer gravitation (allowed to sink to the bottom) and snap-frozen in liquid nitrogen, followed by storage at -80°C until processing.

*Neurosphere diameter analysis*

On DIV5, neurospheres were imaged and sized using brightfield microscopy on an Olympus IX71 inverted microscope at 4x magnification. Four fields were selected to capture as many neurospheres as possible per field to ensure a representative sample, and images were taken with the attached Olympus DP72 camera. Using the line measurement tool in the accompanying software Cell Sens Dimension 1.16 (Olympus), the diameter of each neurosphere was measured, and the results were exported for downstream analysis in R. On average, 17 neurospheres were counted per treatment condition per culture (min = 6; max = 46), with one culture corresponding to tissue harvested from one rat. There was no statistically significant difference in the number of neurospheres counted between the treatment conditions (Welch’s *t*-test: *t*(22.8) = -0.032, *p* = 0.98, two-tailed; Exercise vs. Sedentary).

***Quantitative Real-Time PCR (qRT-PCR)***

*Primers*

Primers were designed *in silico* using NCBI Primer Blast to measure gene expression of Rasal1 and housekeeper gene Actin B (Actb). Primers were designed to span exon-exon junctions (to avoid genomic DNA, gDNA, amplification) and generate a 70-150 basepair (bp) amplicon. Species-specific (i.e. *R. norvegicus*) RefSeq transcript IDs were used with the RefSeq mRNA database to generate highly gene-specific primers. Predicted RefSeq transcripts were excluded from the search. The primer pair sequences with the lowest self-complementarity and most equal melting temperatures (Tm) and GC content were chosen. Primers were ordered from Eurofins Scientific (Ireland): Rasal1 (F: ACATCTCTGGCACATCGGAC; R: CGGGTCTTCTTGATGGTCGAA); Actb (F: CCCGCGAGTACAACCTTCTTG; R: TCATCCATGGCGAACTGGTGG). Finally, a primer pair for the housekeeper gene Gapdh (F: CTACTGGCGTCTTCACCACC; R: GGCGGAGATGATGACCCTTT) was included to ensure stable expression of Actb across experimental conditions. Actb and Gapdh were both confirmed not to be differentially expressed in any proteomic data set as a function of exercise. Dilution series were carried out during piloting to estimate primer efficiencies. Primer pairs for the detection of the ultra-purified viral vector were suggested by Genecopoeia upon production of the viral vectors (F: TAATACGACTCACTATAGGG; R: CTGGAATAGCTCAGAGGC).

*RNA isolation*

For the *in vitro* experiment, total RNA was isolated from harvested DIV5 neurospheres using a Qiagen RNeasy Mini Kit (Qiagen, Ireland), following the manufacturer’s instructions. The workbench and pipettes were wiped down with Invitrogen™ RNaseZap™ RNase Decontamination Solution (Fisher Scientific, Ireland) to neutralize ambient RNA nucleases, and filter-tip pipette tips were used to prevent cross-contamination. A total of eight samples from four separate cultures were processed. Samples were thawed briefly on ice until the neurosphere pellet was visible and could be loosened. Following cell lysis by addition of lysis buffer and gentle trituration, samples were homogenized by trituration with a 21-gauge needle and syringe, as recommended by the manufacturer. RNA was then isolated and eluted in nuclease-free H2O.

For the *in vivo* experiment, dorsal hippocampal samples were stabilized in RNAlater (Sigma, R0901) and stored at 4°C until used for RNA extraction (n=12-13). Total RNA was extracted using mirVANA miRNA Isolation Kit (Life Technologies, AM1561) according to the manufacturer’s instructions.

Isolated RNA concentration and integrity were measured using a Nanodrop 2000 spectrophotometer (Thermo Fisher, Ireland). Three technical replicate measurements were made for each sample, followed by a blank measurement to ensure no carry-over effects. Technical replicate measurements were averaged to estimate the sample total RNA concentration and purity. All samples were confirmed to be of high purity based on a 260/280 nm absorbance ratio of 2.0.

*cDNA synthesis*

Total RNA was converted to complementary DNA (cDNA) using an Applied BiosystemsTM High-Capacity cDNA Reverse Transcription Kit (Thermo Fisher Scientific, Ireland), following the manufacturer’s instructions. Kit components were thawed on ice to prepare a 2X reaction master mix. Two micrograms of sample total RNA were made up of nuclease-free H2O and added 1:1 to 2X reaction master mix in 0.2 ml MicroAmp Reaction Tubes (Applied BiosystemsTM, Thermo Fisher Scientific, Ireland). Additionally, a reverse transcription (RT) no-template negative control was made by adding nuclease-free H2O 1:1 to the master mix to rule out reagent contamination. The reverse transcription reaction was run on an Agilent SureCycler 8800 thermal cycler (Agilent, Ireland). The program was set up according to the manufacturer’s instructions: 25°C for 10 min, 37°C for 120 min, 85°C for 5 min, 4°C hold. Upon completion, samples were briefly spun down and diluted to a concentration of 20ng/µl. Sample cDNA was stored at 4°C.

*Quantitative PCR (qPCR)*

Measurement of relative gene expression of Rasal1 was performed by quantitative PCR (qPCR), using KiCqStart SYBR Green qPCR ReadyMix (Sigma, Ireland) for the *in vitro* experiment and SYBR MasterMix (qPCRBIO SyGreen Mix Lo-ROX, PCR Biosystems, PB-20.11) for the *in vivo* experiments, following the manufacturer’s instructions. We determined that loading 5ng total cDNA would allow reliable quantification, as all primers displayed log-linearity and ~100% amplification efficiency in dilution series in the range 1- 10ng during piloting. Master mixes, including gene primers, were added to an Armadillo 96-well reaction plate (Thermo Scientific, Ireland), followed by the sample. All samples and controls were run in triplicate. The plate was sealed with optically clear sealing tape (Sarstedt, Ireland) and briefly spun down at room temperature. The qPCR reaction was run on a Roche LightCycler 96 (Roche, Ireland) using the following program recommended by the KiCqStart Universal protocol:

| **Step** | **Temperature (°C)** | **Time (s)** | **Acquisition mode** |
| --- | --- | --- | --- |
| Pre-incubation (1 cycle) | 95 | 120 | None |
| Amplification (45 cycles) | 95 | 10 | None |
|  | 60 | 30 | Single |
| Melting (1 cycle) | 65 | 60 | None |
|  | 95 | 10 | None |
|  | 97 | 1 | Continuous |

*Data analysis*

Raw data were imported into the LightCycler 96 associated PC software (version 1.1.0.1320), and the “relative quantification” option was used to generate threshold cycles (“Ct” or “Cq”) for each sample and gene. These data were exported in tabular form as .csv files and imported into R for analysis. The average Ct value of each sample and gene was used to calculate fold changes according to the Pfaffl method, using the estimated primer efficiencies. For the *in vitro* experiment, the sedentary serum treatment was considered the control, and the exercise serum treatment was considered the experimental treatment. While Actb was used as the main HKG, results were confirmed with Gapdh. For the *in vivo* experiment, LVSCR was considered the control, and LVshRASAL1 was considered the experimental treatment. Fold changes were subject to a two-tailed, one-sample *t-*test with *H0*: FC = 1. Amplification efficiencies of the different primer sets were found to be ~100% and did not deviate more than 5%. Indeed, when estimating the fold changes using the double-delta method, which assumes perfect efficiency, the results were comparable. Statistical analyses were performed in R using the “t_test” function from the *rstatix* package.

Supplementary figures

**Supplementary Figure 1.** **Discovery proteomics in discovery and validation cohorts**. A-D) Volcano plots of proteomic and metabolomic analysis of dentate gyrus (DG; A, B) and serum (C, D) from young adult (Y) rats after exposure to exercise (EX) versus young adult sedentary (Y-SED) rats in discovery (A, C, D) and validation (B) cohorts. Please note that (A) depicts main effect collapsed across DG axis. Top 3 up- and down-regulated features highlighted. E) Common pathways enriched among age and exercise differentially expressed proteins (DEP) in discovery and validation cohorts (sedentary middle aged rats = MA-SED). F) Enriched pathways featuring Rasal1 among exercise DEP in discovery and validation cohorts. G) Enriched ageing-related Gene Expression Omnibus (GEO) pathways among exercise DEP featuring Rasal1 in discovery and validation cohorts. H,I) Raw gel images from Western blot validation of Rasal1 expression in DG gyri from discovery cohort animals. Rasal1 band density was normalized to MemCodeTM Total Protein Stain. Samples from MA-SED animals were originally included to confirm the lack of differential expression of Rasal1 with age.

**Supplementary Figure 2.** **Representative immunohistochemistry images of DG from young adult rats.** Green: cellular marker. Red: Rasal1. Blue: DAPI. Scale bar 50 µm.

**Supplementary Figure 3.** **Expression of Rasal1 in publicly available -omics datasets.** A) Normalized Rasal1 abundance in fluorescence-assisted synaptosome sorting (FASS) brain proteomics from van Oostrum et al (2023). Significant expression enrichment in brain region and synapse type has been highlighted. B) Single cell expression of Rasal1 in young (3 months old), middle-aged (9-11 months old), and old (16-21 months old) mouse dentate gyri in data from Wu et al. (2025). Average expression and percentage of cells expressing Rasal1 across annotated cell types and ages (*top panel*). Scaled expression of Rasal1 in UMAP projection stratified by age (*middle panel*). Scaled Rasal1 expression in re-clustered neurogenic cell subsets *(bottom panel).*

**Supplementary Figure 4.** **Rasal1 downregulation in the dorsal hippocampus of middle-aged rats.** A) Lentiviral vector map. B-C) Area of whole, dorsal and ventral dentate gyrus (DG) measured in immunohistochemistry for Ki67 and DCX-positive cell counts.

Tables

Supplementary Table 1. List of loaded R packages.

| Package | Version | Package URL |
| --- | --- | --- |
| affy | 1.72.0 | NA |
| AnnotationDbi | 1.56.2 | https://bioconductor.org/packages/AnnotationDbi |
| arrangements | 1.1.9 | https://github.com/randy3k/arrangements |
| arrow | 12.0.0 | https://github.com/apache/arrow/, https://arrow.apache.org/docs/r/ |
| assertthat | 0.2.1 | NA |
| Biobase | 2.54.0 | https://bioconductor.org/packages/Biobase |
| BiocGenerics | 0.40.0 | https://bioconductor.org/packages/BiocGenerics |
| BiocParallel | 1.28.3 | https://github.com/Bioconductor/BiocParallel |
| Biostrings | 2.62.0 | https://bioconductor.org/packages/Biostrings |
| camprotR | 0.0.0.9000 | NA |
| clusterProfiler | 4.2.2 | https://yulab-smu.top/biomedical-knowledge-mining-book/ (docs), https://doi.org/10.1016/j.xinn.2021.100141 (paper) |
| cowplot | 1.1.1 | https://wilkelab.org/cowplot/ |
| DEP | 1.16.0 | NA |
| DOSE | 3.20.1 | https://yulab-smu.top/biomedical-knowledge-mining-book/ |
| dplyr | 1.1.4 | https://dplyr.tidyverse.org, https://github.com/tidyverse/dplyr |
| edgeR | 3.36.0 | http://bioinf.wehi.edu.au/edgeR, https://bioconductor.org/packages/edgeR |
| enrichplot | 1.14.2 | https://yulab-smu.top/biomedical-knowledge-mining-book/ |
| enrichR | 3.2 | NA |
| forcats | 1.0.0 | https://forcats.tidyverse.org/, https://github.com/tidyverse/forcats |
| genefilter | 1.76.0 | NA |
| GenomeInfoDb | 1.30.1 | https://bioconductor.org/packages/GenomeInfoDb |
| GenomicRanges | 1.46.1 | https://bioconductor.org/packages/GenomicRanges |
| ggbeeswarm | 0.7.2 | https://github.com/eclarke/ggbeeswarm |
| ggh4x | 0.2.8 | https://github.com/teunbrand/ggh4x, https://teunbrand.github.io/ggh4x/ |
| gghighlight | 0.4.0 | https://yutannihilation.github.io/gghighlight/, https://github.com/yutannihilation/gghighlight/ |
| ggplot2 | 3.5.1 | https://ggplot2.tidyverse.org, https://github.com/tidyverse/ggplot2 |
| ggpmisc | 0.6.1 | https://docs.r4photobiology.info/ggpmisc/, https://github.com/aphalo/ggpmisc |
| ggpp | 0.5.8-1 | https://docs.r4photobiology.info/ggpp/, https://github.com/aphalo/ggpp |
| ggprism | 1.0.4 | https://csdaw.github.io/ggprism/, https://github.com/csdaw/ggprism |
| ggpubr | 0.6.0.999 | https://rpkgs.datanovia.com/ggpubr/ |
| ggrepel | 0.9.5 | https://ggrepel.slowkow.com/, https://github.com/slowkow/ggrepel |
| ggtext | 0.1.2 | https://wilkelab.org/ggtext/ |
| ggVennDiagram | 1.2.2 | https://github.com/gaospecial/ggVennDiagram |
| gmm | 1.8 | NA |
| gt | 0.9.0 | https://gt.rstudio.com/, https://github.com/rstudio/gt |
| Hmisc | 5.1-0 | https://hbiostat.org/R/Hmisc/ |
| httr | 1.4.7 | https://httr.r-lib.org/, https://github.com/r-lib/httr |
| impute | 1.68.0 | NA |
| imputeLCMD | 2.1 | NA |
| IRanges | 2.28.0 | https://bioconductor.org/packages/IRanges |
| janitor | 2.2.0 | https://github.com/sfirke/janitor, https://sfirke.github.io/janitor/ |
| lattice | 0.20-45 | http://lattice.r-forge.r-project.org/ |
| lemon | 0.5.0 | https://github.com/stefanedwards/lemon |
| limma | 3.50.3 | http://bioinf.wehi.edu.au/limma |
| lubridate | 1.9.3 | https://lubridate.tidyverse.org, https://github.com/tidyverse/lubridate |
| MASS | 7.3-60 | http://www.stats.ox.ac.uk/pub/MASS4/ |
| Matrix | 1.6-0 | https://Matrix.R-forge.R-project.org |
| MatrixGenerics | 1.6.0 | https://bioconductor.org/packages/MatrixGenerics |
| matrixStats | 1.3.0 | https://github.com/HenrikBengtsson/matrixStats |
| MetaboAnalystR | 4.0.0 | NA |
| mgcv | 1.8-41 | NA |
| mixOmics | 6.18.1 | http://www.mixOmics.org |
| MOFA2 | 1.4.0 | https://biofam.github.io/MOFA2/index.html |
| mvtnorm | 1.2-5 | http://mvtnorm.R-forge.R-project.org |
| nlme | 3.1-162 | https://svn.r-project.org/R-packages/trunk/nlme/ |
| norm | 1.0-11.1 | NA |
| nplyr | 0.2.0 | https://github.com/markjrieke/nplyr, https://markjrieke.github.io/nplyr/ |
| officer | 0.6.7 | https://ardata-fr.github.io/officeverse/, https://davidgohel.github.io/officer/ |
| org.Rn.eg.db | 3.14.0 | NA |
| patchwork | 1.2.0 | https://patchwork.data-imaginist.com, https://github.com/thomasp85/patchwork |
| pcaMethods | 1.86.0 | https://github.com/hredestig/pcamethods |
| purrr | 1.0.2 | https://purrr.tidyverse.org/, https://github.com/tidyverse/purrr |
| RColorBrewer | 1.1-3 | NA |
| readr | 2.1.4 | https://readr.tidyverse.org, https://github.com/tidyverse/readr |
| readxl | 1.4.3 | https://readxl.tidyverse.org, https://github.com/tidyverse/readxl |
| reticulate | 1.30 | https://rstudio.github.io/reticulate/, https://github.com/rstudio/reticulate |
| rlang | 1.1.4 | https://rlang.r-lib.org, https://github.com/r-lib/rlang |
| rstatix | 0.7.2 | https://rpkgs.datanovia.com/rstatix/ |
| RVenn | 1.1.0 | NA |
| S4Vectors | 0.32.4 | https://bioconductor.org/packages/S4Vectors |
| sandwich | 3.1-0 | https://sandwich.R-Forge.R-project.org/ |
| scales | 1.3.0 | https://scales.r-lib.org, https://github.com/r-lib/scales |
| Seurat | 4.3.0 | https://satijalab.org/seurat, https://github.com/satijalab/seurat |
| SeuratObject | 4.1.3 | https://mojaveazure.github.io/seurat-object/, https://github.com/mojaveazure/seurat-object |
| STRINGdb | 2.6.5 | NA |
| stringr | 1.5.1 | https://stringr.tidyverse.org, https://github.com/tidyverse/stringr |
| SummarizedExperiment | 1.24.0 | https://bioconductor.org/packages/SummarizedExperiment |
| sva | 3.42.0 | NA |
| textclean | 0.9.3 | https://github.com/trinker/textclean |
| tibble | 3.2.1 | https://tibble.tidyverse.org/, https://github.com/tidyverse/tibble |
| tidyr | 1.3.1 | https://tidyr.tidyverse.org, https://github.com/tidyverse/tidyr |
| tidytext | 0.4.1 | https://github.com/juliasilge/tidytext |
| tidyverse | 2.0.0 | https://tidyverse.tidyverse.org, https://github.com/tidyverse/tidyverse |
| tmvtnorm | 1.5 | https://www.r-project.org |
| tximeta | 1.12.4 | https://github.com/mikelove/tximeta |
| UpSetR | 1.4.0 | http://github.com/hms-dbmi/UpSetR |
| variancePartition | 1.24.1 | http://bioconductor.org/packages/variancePartition, https://DiseaseNeuroGenomics.github.io/variancePartition |
| viridis | 0.6.5 | https://sjmgarnier.github.io/viridis/, https://github.com/sjmgarnier/viridis/ |
| viridisLite | 0.4.2 | https://sjmgarnier.github.io/viridisLite/, https://github.com/sjmgarnier/viridisLite/ |
| vsn | 3.62.0 | http://www.r-project.org, http://www.ebi.ac.uk/huber |
| WebGestaltR | 0.4.5 | https://github.com/bzhanglab/WebGestaltR |
| weights | 1.0.4 | NA |
| XVector | 0.34.0 | https://bioconductor.org/packages/XVector |

**Supplementary Table 2.** Statistical analysis and results. Abbreviations: Y-SED (young adult sedentary), Y-EX (young adult exercise), MA-SED (middle-aged sedentary), MA-EX (middle-aged exercise).

| **Figure** | **Graph** | **Groups** | **Test** | **N** | **t** | **df** | **p-value** |
| --- | --- | --- | --- | --- | --- | --- | --- |
| 1 | C | Y-SED, Y-EX | Welch's t test | 10 | 9.202 | 15.84 | <0.0001 |
| 1 | C | MA-SED, MA-EX | Welch's t test | 10 | 0.382 | 12.69 | 0.708 |
| 1 | D | Y-SED, Y-EX | Welch's t test | 10 | 5.155 | 14.21 | 0.0001 |
| 1 | D | MA-SED, MA-EX | Welch's t test | 10 | 0.383 | 17.81 | 0.706 |
| 1 | E-whole | Y-SED, Y-EX | Welch's t test | 10 | 2.444 | 15.29 | 0.02 |
| 1 | E-whole | MA-SED, MA-EX | Welch's t test | 6 | 1.676 | 8.09 | 0.131 |
| 1 | E-dorsal | Y-SED, Y-EX | Welch's t test | 10 | 1.974 | 15.5 | 0.06 |
| 1 | E-dorsal | MA-SED, MA-EX | Welch's t test | 6 | 0.094 | 9.791 | 0.92 |
| 1 | E-ventral | Y-SED, Y-EX | Welch's t test | 10 | 2.71 | 15.75 | 0.01 |
| 1 | E-ventral | MA-SED, MA-EX | Welch's t test | 6 | 0.137 | 7.907 | 0.89 |
| 2 | C | Y-SED, Y-EX | Welch's t test | 10 | 10.63 | 1.15 | <0.01 |
| 2 | D | Y-SED, Y-EX | Welch's t test | 11 | 3.469 | 14.83 | 0.003 |
| 3 | C | LVSCR, LVshRASAL1 | Welch's t test | 8 | 2.055 | 11.01 | 0.06 |
| 3 | D-whole | LVSCR, LVshRASAL1 | Welch's t test | 6 | 1.877 | 5.542 | 0.11 |
| 3 | D-dorsal | LVSCR, LVshRASAL1 | Welch's t test | 6 | 2.702 | 5.121 | 0.04 |
| 3 | D-ventral | LVSCR, LVshRASAL1 | Welch's t test | 6 | 0.539 | 6.585 | 0.6 |
| 3 | E-whole | LVSCR, LVshRASAL1 | Welch's t test | 7 | 2.343 | 7.068 | 0.05 |
| 3 | E-dorsal | LVSCR, LVshRASAL1 | Welch's t test | 7 | 2.421 | 9.06 | 0.03 |
| 3 | E-ventral | LVSCR, LVshRASAL1 | Welch's t test | 7 | 1.045 | 6.461 | 0.33 |
| 3 | F-length | LVSCR, LVshRASAL1 | Welch's t test | 5 | 0.239 | 6.213 | 0.81 |
| 3 | F-number | LVSCR, LVshRASAL1 | Welch's t test | 5 | 0.847 | 6.515 | 0.42 |
| 3 | F-length/number | LVSCR, LVshRASAL1 | Welch's t test | 5 | 2.484 | 6.095 | 0.04 |

Supplementary Dataset 1 (separate file). Proteomics and metabolomics differential expression analysis data for all contrasts and datasets.

Supplementary Dataset 2 (separate file). Proteomics and metabolomics pathway over-representation analysis results for all contrasts and datasets. The pathway databases (i.e. GO - no redundant terms, KEGG, MSigDB Hallmarks, GEO Aging Perturbations, and PPI Hub Proteins) are indicated on each sheet.

Supplementary Dataset 3 (separate file). Correlations between Rasal1 expression, dentate protein expression (dorsal and ventral), serum protein and metabolite expression.

Supplementary Dataset 4 (separate file). GO and KEGG pathway enrichment analysis of dorsal and ventral dentate proteins significantly correlated with dorsal and ventral Rasal1 expression, stratified by correlation sign.

Supplementary Dataset 5 (separate file). Overview of animal studies and their associated samples, data, and figures.

1. Chen H, Cheng ZY, Pan Y, Wang Z, Liu Y, Zhang JQ. RASAL1 influences the proliferation and invasion of gastric cancer cells by regulating the RAS/ERK signaling pathway. Hum Cell. 2014;27(3):103–10.

2. Meier F, Brunner AD, Frank M, Ha A, Bludau I, Voytik E, et al. diaPASEF: parallel accumulation-serial fragmentation combined with data-independent acquisition. Nat Methods [Internet]. 2020 Dec 1 [cited 2025 Nov 20];17(12):1229–36. Available from: https://pubmed.ncbi.nlm.nih.gov/33257825/

3. Meier F, Beck S, Grassl N, Lubeck M, Park MA, Raether O, et al. Parallel Accumulation-Serial Fragmentation (PASEF): Multiplying Sequencing Speed and Sensitivity by Synchronized Scans in a Trapped Ion Mobility Device. J Proteome Res [Internet]. 2015 Dec 4 [cited 2025 Nov 20];14(12):5378–87. Available from: https://pubmed.ncbi.nlm.nih.gov/26538118/

4. Tyanova S, Temu T, Cox J. The MaxQuant computational platform for mass spectrometry-based shotgun proteomics. Nat Protoc [Internet]. 2016;11(12):2301–19. Available from: http://dx.doi.org/10.1038/nprot.2016.136

5. Cox J, Hein MY, Luber CA, Paron I, Nagaraj N, Mann M. Accurate proteome-wide label-free quantification by delayed normalization and maximal peptide ratio extraction, termed MaxLFQ. Molecular and Cellular Proteomics. 2014;13(9):2513–26.

6. Demichev V, Szyrwiel L, Yu F, Teo GC, Rosenberger G, Niewienda A, et al. dia-PASEF data analysis using FragPipe and DIA-NN for deep proteomics of low sample amounts. Nat Commun. 2022;13(1).

7. Demichev V, Messner CB, Vernardis SI, Lilley KS, Ralser M. DIA-NN: neural networks and interference correction enable deep proteome coverage in high throughput. Nat Methods. 2020;17(1):41–4.

8. Kong AT, Leprevost F V., Avtonomov DM, Mellacheruvu D, Nesvizhskii AI. MSFragger: Ultrafast and comprehensive peptide identification in mass spectrometry-based proteomics. Nat Methods. 2017;14(5):513–20.

9. Yu F, Haynes SE, Teo GC, Avtonomov DM, Polasky DA, Nesvizhskii AI. Fast Quantitative Analysis of timsTOF PASEF Data with MSFragger and IonQuant. Molecular and Cellular Proteomics [Internet]. 2020;19(9):1575–85. Available from: http://dx.doi.org/10.1074/mcp.TIR120.002048

10. da Veiga Leprevost F, Haynes SE, Avtonomov DM, Chang HY, Shanmugam AK, Mellacheruvu D, et al. Philosopher: a versatile toolkit for shotgun proteomics data analysis. Nat Methods [Internet]. 2020;17(9):869–70. Available from: http://dx.doi.org/10.1038/s41592-020-0912-y

11. Tyanova S, Cox J. Perseus: A Bioinformatics Platform for Integrative Analysis of Proteomics Sata in Cancer Research. Methods Mol Biol. 2018.

12. Lazar C, Gatto L, Ferro M, Bruley C, Burger T. Accounting for the Multiple Natures of Missing Values in Label-Free Quantitative Proteomics Data Sets to Compare Imputation Strategies. J Proteome Res. 2016;15(4):1116–25.

13. Nicolas S, Dohm-Hansen S, Lavelle A, Bastiaanssen TFS, English JA, Cryan JF, et al. Exercise mitigates a gut microbiota-mediated reduction in adult hippocampal neurogenesis and associated behaviours in rats. Transl Psychiatry. 2024;14(1).

14. Grabrucker S, Marizzoni M, Silajdžić E, Lopizzo N, Mombelli E, Nicolas S, et al. Microbiota from Alzheimer’s patients induce deficits in cognition and hippocampal neurogenesis. Brain [Internet]. 2023; Available from: http://www.ncbi.nlm.nih.gov/pubmed/37849234

15. Argelaguet R, Velten B, Arnol D, Dietrich S, Zenz T, Marioni JC, et al. Multi-Omics Factor Analysis-a framework for unsupervised integration of multi-omics data sets. Mol Syst Biol [Internet]. 2018 Jun [cited 2025 Nov 20];14(6). Available from: https://pubmed.ncbi.nlm.nih.gov/29925568/

16. van Oostrum M, Blok TM, Giandomenico SL, tom Dieck S, Tushev G, Fürst N, et al. The proteomic landscape of synaptic diversity across brain regions and cell types. Cell [Internet]. 2023 Nov 22 [cited 2025 Nov 20];186(24):5411-5427.e23. Available from: https://pubmed.ncbi.nlm.nih.gov/37918396/

17. Wu Y, Korobeynyk VI, Zamboni M, Waern F, Cole JD, Mundt S, et al. Multimodal transcriptomics reveal neurogenic aging trajectories and age-related regional inflammation in the dentate gyrus. Nat Neurosci [Internet]. 2025 Feb 1 [cited 2025 Nov 20];28(2):415–30. Available from: https://pubmed.ncbi.nlm.nih.gov/39762661/

18. Brummelte S, Galea LAM. Chronic high corticosterone reduces neurogenesis in the dentate gyrus of adult male and female rats. Neuroscience [Internet]. 2010;168(3):680–90. Available from: http://dx.doi.org/10.1016/j.neuroscience.2010.04.023
