# Supplementary material for: Rasal1: A candidate exercise mimetic to increase adult hippocampal neurogenesis in middle age
Source: Research Square preprint supplement (doi:10.21203/rs.3.rs-8394751/v1), 2026-02-13
Supplement: Supplementary file 5 [file b83f8a5814a2e79ead54a9e8.xlsx]

## Sheet: Info
sheet	study	matrix	modality	contrast	method
2	Discovery	Serum	Metabolomics	Exercise.VS.Sedentary.IN.Young	KEGG_rnor
3	Discovery	Serum	Metabolomics	Middle_aged.VS.Young.IN.Sedentary	KEGG_rnor
4	Discovery	Dentate Gyrus (Dorsal)	Proteomics	Exercise.VS.Sedentary.IN.Young	enrichr
5	Discovery	Dentate Gyrus (Ventral)	Proteomics	Exercise.VS.Sedentary.IN.Young	enrichr
6	Discovery	Dentate Gyrus	Proteomics	Exercise.VS.Sedentary.IN.Young	enrichr
7	Discovery	Dentate Gyrus (Dorsal)	Proteomics	Middle_aged.VS.Young.IN.Sedentary	enrichr
8	Discovery	Dentate Gyrus (Ventral)	Proteomics	Middle_aged.VS.Young.IN.Sedentary	enrichr
9	Discovery	Dentate Gyrus	Proteomics	Middle_aged.VS.Young.IN.Sedentary	enrichr
10	Discovery	Dentate Gyrus (Dorsal)	Proteomics	Exercise.VS.Sedentary.IN.Young	GOnored_KEGG
11	Discovery	Dentate Gyrus (Ventral)	Proteomics	Exercise.VS.Sedentary.IN.Young	GOnored_KEGG
12	Discovery	Dentate Gyrus	Proteomics	Exercise.VS.Sedentary.IN.Young	GOnored_KEGG
13	Discovery	Dentate Gyrus (Dorsal)	Proteomics	Middle_aged.VS.Young.IN.Sedentary	GOnored_KEGG
14	Discovery	Dentate Gyrus (Ventral)	Proteomics	Middle_aged.VS.Young.IN.Sedentary	GOnored_KEGG
15	Discovery	Dentate Gyrus	Proteomics	Middle_aged.VS.Young.IN.Sedentary	GOnored_KEGG
16	Discovery	Serum	Proteomics	Exercise.VS.Sedentary.IN.Young	enrichr
17	Discovery	Serum	Proteomics	Middle_aged.VS.Young.IN.Sedentary	enrichr
18	Discovery	Serum	Proteomics	Exercise.VS.Sedentary.IN.Young	GOnored_KEGG
19	Discovery	Serum	Proteomics	Middle_aged.VS.Young.IN.Sedentary	GOnored_KEGG
20	Validation	Dentate Gyrus	Proteomics	Exercise.VS.Sedentary.IN.Young	enrichr
21	Validation	Dentate Gyrus	Proteomics	Middle_aged.VS.Young.IN.Sedentary	enrichr
22	Validation	Dentate Gyrus	Proteomics	Exercise.VS.Sedentary.IN.Young	GOnored_KEGG
23	Validation	Dentate Gyrus	Proteomics	Middle_aged.VS.Young.IN.Sedentary	GOnored_KEGG

## Sheet: sheet_2
pathway	description	enrichment_ratio	fdr	features
rno00970	Aminoacyl-tRNA biosynthesis	28.992	0.00313773	HMDB0000167/HMDB0000158/HMDB0000929
rno04974	Protein digestion and absorption	15.7565	0.0098889	HMDB0000167/HMDB0000158/HMDB0000929
rno00380	Tryptophan metabolism	11.6903	0.0158574	HMDB0000197/HMDB0001389/HMDB0000929
rno00400	Phenylalanine, tyrosine and tryptophan biosynthesis	20.1333	0.0256887	HMDB0000158/HMDB0000929
rno02010	ABC transporters	7.96484	0.0256887	HMDB0000294/HMDB0000167/HMDB0000725
rno04978	Mineral absorption	17.2571	0.0256887	HMDB0000167/HMDB0000929
rno00360	Phenylalanine metabolism	13.8057	0.0315473	HMDB0000158/HMDB0000375
rno05230	Central carbon metabolism in cancer	13.4222	0.0315473	HMDB0000158/HMDB0000929
rno00470	D-Amino acid metabolism	10.2809	0.0457739	HMDB0000167/HMDB0000725
rno00260	Glycine, serine and threonine metabolism	9.86122	0.0457739	HMDB0000167/HMDB0000929

## Sheet: sheet_3
pathway	description	enrichment_ratio	fdr	features
rno05230	Central carbon metabolism in cancer	32.0966	1.35457e-13	HMDB0000172/HMDB0000161/HMDB0000190/HMDB0000177/HMDB0000687/HMDB0000168/HMDB0000187/HMDB0000159/HMDB0000641/HMDB0000243/HMDB0000148
rno00970	Aminoacyl-tRNA biosynthesis	37.8157	7.55836e-12	HMDB0000172/HMDB0000161/HMDB0000177/HMDB0000687/HMDB0000168/HMDB0000187/HMDB0000159/HMDB0000641/HMDB0000148
rno04974	Protein digestion and absorption	20.552	2.06329e-09	HMDB0000172/HMDB0000161/HMDB0000177/HMDB0000687/HMDB0000168/HMDB0000187/HMDB0000159/HMDB0000641/HMDB0000148
rno02010	ABC transporters	12.6976	2.06329e-09	HMDB0000725/HMDB0000172/HMDB0000161/HMDB0000251/HMDB0000177/HMDB0000687/HMDB0000187/HMDB0000159/HMDB0000641/HMDB0000097/HMDB0000148
rno04978	Mineral absorption	26.2609	4.07501e-08	HMDB0000172/HMDB0000161/HMDB0000687/HMDB0000168/HMDB0000187/HMDB0000159/HMDB0000641
rno00470	D-Amino acid metabolism	17.8797	5.44676e-08	HMDB0000725/HMDB0000161/HMDB0000177/HMDB0000187/HMDB0000159/HMDB0000641/HMDB0000243/HMDB0000148
rno00250	Alanine, aspartate and glutamate metabolism	18.7578	4.49197e-05	HMDB0000161/HMDB0000168/HMDB0000641/HMDB0000243/HMDB0000148
rno00430	Taurine and hypotaurine metabolism	18.2684	0.000460309	HMDB0000161/HMDB0000251/HMDB0000243/HMDB0000148
rno00330	Arginine and proline metabolism	9.37888	0.00113895	HMDB0000725/HMDB0000562/HMDB0000243/HMDB0003464/HMDB0000148
rno00220	Arginine biosynthesis	15.7565	0.00580203	HMDB0003357/HMDB0000641/HMDB0000148
rno00630	Glyoxylate and dicarboxylate metabolism	8.40348	0.00733762	HMDB0000187/HMDB0000641/HMDB0000243/HMDB0000148
rno00770	Pantothenate and CoA biosynthesis	12.6052	0.00945596	HMDB0000210/HMDB0000026/HMDB0000243
rno00410	beta-Alanine metabolism	11.2547	0.0122026	HMDB0000210/HMDB0000026/HMDB0000177

## Sheet: sheet_4
pathway	description	enrichment_ratio	fdr	features
MSigDB_Hallmark_2020	Hedgehog Signaling	23.5152	0.000225629	Cntfr;Rtn1;Crmp1;Nrcam;L1cam
MSigDB_Hallmark_2020	Adipogenesis	5.32294	0.00605102	Acly;Slc27a1;Tst;Cat;Cox6a1;Dld;Coq5
MSigDB_Hallmark_2020	Complement	5.32294	0.00605102	Ehd1;Actn2;Gnb2;Cdh13;Lap3;Ctsb;Hspa1a
MSigDB_Hallmark_2020	Glycolysis	5.32294	0.00605102	Vcan;Dpysl4;Got1;Stmn1;Ak4;Aldh7a1;Dld
MSigDB_Hallmark_2020	Coagulation	5.45279	0.0187114	Tf;Gnb2;Capn2;Crip2;Ctsb
MSigDB_Hallmark_2020	Apical Junction	4.50515	0.0187114	Gamt;Cadm3;Vcan;Actn2;Epb41l2;Sirpa
MSigDB_Hallmark_2020	Oxidative Phosphorylation	4.50515	0.0187114	Hadhb;Glud1;Vdac1;Cox6a1;Slc25a5;Dld
MSigDB_Hallmark_2020	UV Response Dn	5.21583	0.0196108	Gja1;Kit;Atp2b4;Prkca;Add3
MSigDB_Hallmark_2020	Fatty Acid Metabolism	4.7352	0.0258031	Hadhb;Hsph1;Acot2;Glul;Dld
MSigDB_Hallmark_2020	Hypoxia	3.70739	0.0466184	Bcan;Dpysl4;Ncan;Prkca;Ak4
MSigDB_Hallmark_2020	Estrogen Response Late	3.70739	0.0466184	Tst;Sord;Atp2b4;Ckb;Add3
MSigDB_Hallmark_2020	mTORC1 Signaling	3.70739	0.0466184	Acly;Got1;Sord;Ak4;Add3
MSigDB_Hallmark_2020	heme Metabolism	3.70739	0.0466184	Hebp1;Aldh1l1;Cat;Hagh;Ctsb
Aging_Perturbations_from_GEO_up	Rat liver 12 months vs 24 months GSE11097 aging:195	7.24596	1.37143e-06	A1i3;Ak4;Suox;Oxr1;Hebp1;Acly;Tf;Alcam;Tst;Cat;Hagh;Slc25a5;Aldh7a1;Calm2;Ctsb
Aging_Perturbations_from_GEO_up	Rat liver 4 months vs 24 months GSE11097 aging:191	6.9593	1.37143e-06	Btf3;Ahsg;Rps3a;Crip2;Eef1g;Hadhb;Acly;Glud1;Tf;Eef1d;Alb;Psme2;Rps2;Slc25a5;Calm2
Aging_Perturbations_from_GEO_up	Rat hippocampus CA1 18 months vs 28 months GSE21681 aging:354	6.89628	1.37143e-06	Slc27a1;Got1;Pebp1;Rasal1;Crip2;Park7;Cox6a1;L1cam;Tf;Alcam;Tst;Gnb2;Ckb;Glul;Ctsb
Aging_Perturbations_from_GEO_up	Rat liver 4 months vs 12 months GSE11097 aging:190	7.51757	1.37143e-06	A1i3;Got1;Ndufa12;Ahsg;Sord;Rps3a;Hebp1;Acly;Glud1;Tf;Rps2;Slc25a5;Aldh7a1;Calm2
Aging_Perturbations_from_GEO_up	Rat liver 6 months vs 24 months GSE11097 aging:198	6.66741	3.70626e-06	Btf3;Ndufa12;Pebp1;Rps3a;Hebp1;Acly;Tf;Alcam;Alb;Psme2;Rps2;Slc25a5;Calm2;Ctsb
Aging_Perturbations_from_GEO_up	Rat liver 6 months vs 11 months GSE11097 aging:196	6.48368	4.60452e-06	Aldh1l1;Ndufa12;Gstt3;Sord;Pebp1;Crip2;Hebp1;Acly;Alcam;Hsph1;Alb;Cat;Aldh7a1;Calm2
Aging_Perturbations_from_GEO_up	Rat femur 6 weeks vs 26 weeks GDS509 aging:257	6.19864	7.01027e-06	Ctbp1;Pebp1;Crip2;Park7;Cox6a1;Acly;Vcan;Stmn1;Dnaja2;Flot2;Rps2;Slc25a5;Aldh7a1;Calm2
Aging_Perturbations_from_GEO_up	Rat hippocampus CA3 18 months vs 28 months GSE21681 aging:356	5.92057	1.00013e-05	Got1;Wipf3;Pebp1;Rasal1;Crip2;Park7;Cox6a1;L1cam;Eif1;Bcan;Tst;Gnb2;Ckb;Ctsb
Aging_Perturbations_from_GEO_up	Rat diaphysealfemoralcallus 26 weeks vs 52 weeks GDS1995 aging:117	5.39183	1.17581e-05	Ctbp1;Ak1;Rps3a;Crip2;Pdyn;Hadhb;Nsfl1c;Gja1;Tf;Flot2;Ckb;Glul;Calm2;Ctsb;Mapk3
Aging_Perturbations_from_GEO_up	Rat femur 12 weeks vs 32 weeks GDS509 aging:261	5.57993	3.48796e-05	Actn2;Pebp1;Crip2;Park7;Cox6a1;Eef1g;Acan;Gnb2;Ckb;Rps2;Slc25a5;Glul;Ctsb
Aging_Perturbations_from_GEO_up	Rat hippocampus dentate gyrus 18 months vs 28 months GSE21681 aging:357	5.47007	3.83891e-05	Got1;Ndufa12;Crip2;Park7;L1cam;Oxr1;Tf;Gnb2;Gnb1;Cdh13;Ckb;Glul;Ctsb
Aging_Perturbations_from_GEO_up	Rat diaphysealfemoralcallus 6 weeks vs 52 weeks GDS1995 aging:116	5.40917	4.03397e-05	Actn2;Ctbp1;Ak1;Pebp1;Crip2;Pdyn;Hadhb;Nsfl1c;Gnb2;Vdac1;Rps2;Glul;Ctsb
Aging_Perturbations_from_GEO_up	Rat femur 12 weeks vs 58 weeks GDS509 aging:267	4.93396	4.30354e-05	Pebp1;Crip2;Cox6a1;Pdyn;Eef1g;Acan;Gnb2;Capn2;Ckb;Rps2;Slc25a5;Glul;Calm2;Ctsb
Aging_Perturbations_from_GEO_up	Rat liver 4 months vs 24 months GSE11097 aging:193	5.73458	4.4701e-05	Hebp1;Acly;Tf;Alcam;Tst;Alb;Psme2;Ak4;Crip2;Slc25a5;Calm2;Ctsb
Aging_Perturbations_from_GEO_up	Rat femur 32 weeks vs 58 weeks GDS509 aging:273	4.80927	5.23183e-05	Rab5b;Ctbp1;Pebp1;Crip2;Pdyn;Eef1g;Hadhb;Gnb2;Gnb1;Capn2;Flot2;Ckb;Ctsb;Mapk3
Aging_Perturbations_from_GEO_up	Rat hippocampus 7 months vs 21 months GDS4019 aging:98	6.02585	6.19235e-05	Btf3;Acly;Snap25;Slc27a1;Tf;Stmn1;Capn2;Calm2;Aars;Ctsb;Mapk3
Aging_Perturbations_from_GEO_up	Rat liver 11 months vs 24 months GSE11097 aging:200	5.3535	0.00016531	Btf3;Hebp1;Acly;Tf;Alcam;A1i3;Psme2;Rps3a;Rps2;Slc25a5;Calm2
Aging_Perturbations_from_GEO_up	Rat hippocampus 7 months vs 21 months GDS4019 aging:97	5.30121	0.000174213	Btf3;Tf;Stmn1;Capn2;Anxa11;Rps3a;Pdyn;Glul;Calm2;Appl2;Ctsb
Aging_Perturbations_from_GEO_up	Rat femur 30 weeks vs 56 weeks GDS509 aging:272	4.46163	0.000177432	Actn2;Ctbp1;Rps3a;Crip2;Pdyn;Eef1g;Acan;Gnb2;Ckb;Rps2;Glul;Calm2;Ctsb
Aging_Perturbations_from_GEO_up	Rat femur 6 weeks vs 52 weeks GDS509 aging:262	5.23303	0.000177432	Hadhb;Tf;Ctbp1;Cat;Rps3a;Park7;Hagh;Cox6a1;Glul;Ctsb;Mapk3
Aging_Perturbations_from_GEO_up	Rat hippocampus dentate gyrus 18 months vs 28 months GSE21681 aging:358	5.23303	0.000177432	Tf;Got1;Ndufa12;Gnb2;Gnb1;Pebp1;Ckb;Cox6a1;L1cam;Eif1;Ctsb
Aging_Perturbations_from_GEO_up	Rat hippocampus CA1 18 months vs 28 months GSE21681 aging:353	5.18302	0.000187323	Tf;Got1;Pebp1;Crip2;Park7;Ckb;Cox6a1;L1cam;Glul;Eif1;Ctsb
Aging_Perturbations_from_GEO_up	Rat femur 26 weeks vs 52 weeks GDS509 aging:268	4.13432	0.0005627	Eef1g;Tf;Ctbp1;Gnb2;Stmn1;Cat;Rps2;Cox6a1;Slc25a5;Calm2;Ctsb;Mapk3
Aging_Perturbations_from_GEO_up	Rat femur 6 weeks vs 52 weeks GDS509 aging:263	4.43253	0.000582006	Eef1g;Gja1;Stmn1;Dnaja2;Park7;Rps2;Glul;Aldh7a1;Calm2;Ctsb;Mapk3
Aging_Perturbations_from_GEO_up	Rat femur 10 weeks vs 56 weeks GDS509 aging:266	4.42042	0.000582006	Eef1g;Acan;Actn2;Ctbp1;Gnb2;Crip2;Ckb;Rps2;Pdyn;Slc25a5;Ctsb
Aging_Perturbations_from_GEO_up	Rat femur 8 weeks vs 54 weeks GDS509 aging:265	4.36083	0.000609947	Eef1g;Acan;Rab5b;Actn2;Gnb2;Capn2;Pebp1;Rps3a;Rps2;Calm2;Ctsb
Aging_Perturbations_from_GEO_up	Rat femur 7 weeks vs 53 weeks GDS509 aging:264	4.36083	0.000609947	Eef1g;Acan;Vcan;Gnb2;Capn2;Rps3a;Crip2;Rps2;Pdyn;Calm2;Ctsb
Aging_Perturbations_from_GEO_up	Rat liver 18 months vs 24 months GSE11097 aging:201	4.69082	0.00067517	Btf3;Hebp1;Acly;Tf;Alcam;Hsph1;A1i3;Ndufa12;Pebp1;Rps3a
Aging_Perturbations_from_GEO_up	Rat liver 12 months vs 24 months GSE11097 aging:194	4.64626	0.000697678	Btf3;Eef1g;Hadhb;Acly;Glud1;Eef1d;Alb;Rps3a;Crip2;Aars
Aging_Perturbations_from_GEO_up	Rat thoracicaorta 3 months vs 6 months GDS3077 aging:119	4.22404	0.000732804	Eef1g;Acly;Hsph1;Alb;Cat;Rps3a;Crip2;Rps2;Cox6a1;Slc25a5;Aldh7a1
Aging_Perturbations_from_GEO_up	Rat hippocampus CA3 18 months vs 28 months GSE21681 aging:355	4.53143	0.000814234	Alcam;Got1;Gnb2;Wipf3;Park7;Ckb;Cox6a1;Glul;Oxr1;Ctsb
Aging_Perturbations_from_GEO_up	Rat whiteadipose 4 months vs 28 months GDS3102 aging:126	4.68278	0.00121589	Btf3;Oxct1;Psme2;Rps3a;Rps2;Slc25a5;Calm2;Oxr1;Ctsb
Aging_Perturbations_from_GEO_up	Rat femur 28 weeks vs 54 weeks GDS509 aging:271	3.98788	0.00177441	Eef1g;Glud1;Acan;Rab5b;Rps3a;Crip2;Ckb;Slc25a5;Calm2;Ctsb
Aging_Perturbations_from_GEO_up	Rat liver 4 months vs 12 months GSE11097 aging:192	4.27163	0.00198974	Gamt;Btf3;Acly;Tf;Alcam;Alb;Psme2;Crip2;Calm2
Aging_Perturbations_from_GEO_up	Rat femur 27 weeks vs 53 weeks GDS509 aging:270	3.80078	0.00232024	Acan;Gnb2;Capn2;Rps3a;Rps2;Pdyn;Calm2;Hapln1;Ctsb;Mapk3
Aging_Perturbations_from_GEO_up	Rat thoracicaorta 6 months vs 28 months GDS3077 aging:123	4.49911	0.00267402	Eef1g;Gnb2;Capn2;Rps3a;Crip2;Ctsb;Mapk3;Hspa1a
Aging_Perturbations_from_GEO_up	Rat frontalcortex 4 months vs 22 months GDS3939 aging:99	4.4475	0.00283308	Tf;Rtn1;Rps3a;Crym;Glul;Calm2;Oxr1;Ctsb
Aging_Perturbations_from_GEO_up	Rat posteriorcricoarytenoid 6 months vs 30 months GDS1278 aging:74	4.11652	0.00410344	Hadhb;Nsfl1c;Psme2;Rps3a;Park7;Rps2;Slc25a5;Glul
Aging_Perturbations_from_GEO_up	Rat thoracicaorta 6 months vs 15 months GDS3077 aging:122	4.05891	0.00430827	Gnb2;Alb;Capn2;Flot2;Rps3a;Ckb;Ctsb;Mapk3
Aging_Perturbations_from_GEO_up	Rat heart 4 months vs 28 months GDS3102 aging:125	4.03069	0.00438801	Eef1g;Ndufa12;Vdac1;Rps3a;Crym;Glul;Calm2;Ctsb
Aging_Perturbations_from_GEO_up	Rat liver 6 months vs 18 months GSE11097 aging:197	3.76846	0.0058802	Gstt3;Psme2;Crip2;Glul;Aldh7a1;Calm2;Eif1;Ctsb
Aging_Perturbations_from_GEO_up	Rat femur 6 weeks vs 26 weeks GDS509 aging:256	4.83192	0.00615497	Hadhb;Flot2;Park7;Hagh;Glul;Ctsb
Aging_Perturbations_from_GEO_up	Rat femur 26 weeks vs 52 weeks GDS509 aging:269	3.63807	0.00688114	Eef1g;Gja1;Actn2;Stmn1;Rps2;Glul;Calm2;Ctsb
Aging_Perturbations_from_GEO_up	Rat thoracicaorta 15 months vs 28 months GDS3077 aging:124	3.63961	0.0115373	Eef1g;Tf;Crip2;Rps2;Calm2;Ctsb;Mapk3
Aging_Perturbations_from_GEO_up	Rat femur 10 weeks vs 30 weeks GDS509 aging:260	3.79304	0.0157982	Acan;Ckb;Rps2;Cdc42bpb;Pdyn;Slc25a5
Aging_Perturbations_from_GEO_up	Rat femur 7 weeks vs 27 weeks GDS509 aging:258	2.9475	0.0423312	Eef1g;Acan;Vcan;Capn2;Rps2;Ctsb
Aging_Perturbations_from_GEO_down	Rat thoracicaorta 3 months vs 15 months GDS3077 aging:120	10.1676	3.64231e-08	Slc27a1;Pdyn;Hadhb;Acly;Gja1;Tf;Hsph1;Pcca;Tst;Rps2;Slc25a5;Glul;Calm2;Hspa1a
Aging_Perturbations_from_GEO_down	Rat hippocampus 7 months vs 21 months GDS4019 aging:98	7.18703	1.24456e-06	Snrpn;Rtn1;Got1;Ctbp1;Slc2a13;Wipf3;Cacna2d3;Anxa11;Crmp1;Park7;Glud1;Prepl;Hsph1;Rps2
Aging_Perturbations_from_GEO_down	Rat thoracicaorta 6 months vs 15 months GDS3077 aging:122	6.87743	4.50868e-06	Slc27a1;Crip2;Cox6a1;Eef1g;Hadhb;Acly;Hsph1;Tst;Cat;Rps2;Slc25a5;Glul;Calm2
Aging_Perturbations_from_GEO_down	Rat extraocularmuscles 6 months vs 30 months GDS1279 aging:72	7.35596	5.96347e-06	Eef1g;Hadhb;Glud1;Nsfl1c;Rab5b;Tf;Vdac1;Rps3a;Crip2;Ckb;Ctsb;Hspa1a
Aging_Perturbations_from_GEO_down	Rat frontalcortex 4 months vs 22 months GDS3939 aging:99	6.32178	7.79839e-06	Got1;Crmp1;Glud1;Alcam;Hsph1;Oxct1;Stmn1;Gnb1;Ckb;Rps2;Slc25a5;Dld;Aars
Aging_Perturbations_from_GEO_down	Rat ventricle 4 months vs 21 months GDS399 aging:112	5.84808	1.48357e-05	Rala;Actn2;Ctbp1;Pebp1;Crip2;Cox6a1;Pdyn;Eef1g;Flot2;Vdac1;Rps2;Slc25a5;Mapk3
Aging_Perturbations_from_GEO_down	Rat heart 4 months vs 28 months GDS3102 aging:125	6.32138	1.62398e-05	Hadhb;Gja1;Got1;Actn2;Oxct1;Pebp1;Crip2;Rps2;Cox6a1;Dld;Oxr1;Eif1
Aging_Perturbations_from_GEO_down	Rat liver 11 months vs 18 months GSE11097 aging:199	6.00384	2.4061e-05	Gamt;Acly;Glud1;Aldh1l1;Tst;Ndufa12;Ahsg;Gstt3;Sord;Pebp1;Hagh;Aars
Aging_Perturbations_from_GEO_down	Rat hippocampus CA3 18 months vs 28 months GSE21681 aging:356	7.04082	3.83467e-05	Snap25;Rtn1;Ctbp1;Oxct1;Stmn1;Dnaja2;Rps3a;Slc25a5;Calm2;Dld
Aging_Perturbations_from_GEO_down	Rat hippocampus CA3 18 months vs 28 months GSE21681 aging:355	5.96332	0.000123238	Snap25;Rtn1;Ctbp1;Oxct1;Stmn1;Rps3a;Slc25a5;Crym;Calm2;Dld
Aging_Perturbations_from_GEO_down	Rat thoracicaorta 3 months vs 28 months GDS3077 aging:121	5.58021	0.000200738	Hadhb;Acly;Slc27a1;Hsph1;Ctbp1;Cat;Cox6a1;Slc25a5;Glul;Hspa1a
Aging_Perturbations_from_GEO_down	Rat liver 4 months vs 12 months GSE11097 aging:192	5.55918	0.00020179	Glud1;Aldh1l1;A1i3;Got1;Ahsg;Cbs;Cat;Suox;Glul;Aldh7a1
Aging_Perturbations_from_GEO_down	Rat femur 6 weeks vs 26 weeks GDS509 aging:256	4.51383	0.00023662	Eef1g;Tf;Actn2;Ctbp1;Gnb2;Stmn1;Vdac1;Crip2;Rps2;Slc25a5;Calm2;Mapk3
Aging_Perturbations_from_GEO_down	Rat femur 10 weeks vs 30 weeks GDS509 aging:260	4.67566	0.00031131	Eef1g;Hadhb;Rab5b;Tf;Ctbp1;Stmn1;Cat;Rps3a;Hagh;Glul;Calm2
Aging_Perturbations_from_GEO_down	Rat liver 4 months vs 24 months GSE11097 aging:191	5.52695	0.000396914	Aldh1l1;A1i3;Got1;Cat;Gstt3;Pebp1;Hagh;Glul;Aldh7a1
Aging_Perturbations_from_GEO_down	Rat thoracicaorta 15 months vs 28 months GDS3077 aging:124	4.94338	0.000396914	Hadhb;Acly;Ctbp1;Capn2;Vdac1;Rps3a;Cox6a1;Slc25a5;Aldh7a1;Hspa1a
Aging_Perturbations_from_GEO_down	Rat liver 6 months vs 24 months GSE11097 aging:198	5.26262	0.000533724	Gamt;Glud1;Aldh1l1;Tst;Cat;Gstt3;Sord;Hagh;Cox6a1
Aging_Perturbations_from_GEO_down	Rat extensordigitorumlongusmuscles 6 months vs 30 months GDS1279 aging:70	5.24171	0.000533724	Glud1;Rab5b;Snrpn;Ppa2;Got1;Ak1;Vdac1;Rps2;Glul
Aging_Perturbations_from_GEO_down	Rat thoracicaorta 6 months vs 28 months GDS3077 aging:123	4.66102	0.000564716	Hadhb;Acly;Slc27a1;Hsph1;Ctbp1;Cat;Cox6a1;Slc25a5;Glul;Aldh7a1
Aging_Perturbations_from_GEO_down	Rat liver 12 months vs 24 months GSE11097 aging:194	5.1396	0.000574053	Aldh1l1;A1i3;Got1;Cbs;Cat;Gstt3;Pebp1;Hagh;Aldh7a1
Aging_Perturbations_from_GEO_down	Rat hippocampus CA1 18 months vs 28 months GSE21681 aging:353	5.11964	0.000580664	Snap25;Rtn1;Ctbp1;Oxct1;Stmn1;Rps3a;Slc25a5;Crym;Calm2
Aging_Perturbations_from_GEO_down	Rat liver 4 months vs 24 months GSE11097 aging:193	5.09984	0.000587434	Hadhb;Glud1;Aldh1l1;Got1;Ahsg;Cat;Gstt3;Crym;Glul
Aging_Perturbations_from_GEO_down	Rat femur 6 weeks vs 52 weeks GDS509 aging:262	5.06069	0.000610996	Eef1g;Acan;Actn2;Ak1;Pebp1;Vdac1;Crip2;Rps2;Calm2
Aging_Perturbations_from_GEO_down	Rat liver 6 months vs 18 months GSE11097 aging:197	4.92821	0.000727141	Gamt;Acly;Glud1;Aldh1l1;A1i3;Ahsg;Sord;Hagh;Aars
Aging_Perturbations_from_GEO_down	Rat myocardium 18 weeks vs 22 weeks GDS4025 aging:142	4.30503	0.000916897	Hadhb;Psmd6;Got1;Oxct1;Dnaja2;Vdac1;Rps3a;Park7;Slc25a5;Eif1
Aging_Perturbations_from_GEO_down	Rat femur 7 weeks vs 27 weeks GDS509 aging:258	4.60086	0.00109737	Hadhb;Rab5b;Got1;Actn2;Ak1;Vdac1;Ckb;Slc25a5;Calm2
Aging_Perturbations_from_GEO_down	Rat liver 12 months vs 24 months GSE11097 aging:195	4.60597	0.00214459	Gamt;Btf3;Glud1;Aldh1l1;Gstt3;Sord;Cox6a1;Glul
Aging_Perturbations_from_GEO_down	Rat femur 26 weeks vs 52 weeks GDS509 aging:269	4.51658	0.0023924	Acan;Vcan;Ctbp1;Rps3a;Crip2;Park7;Cox6a1;Slc25a5
Aging_Perturbations_from_GEO_down	Rat hippocampus 7 months vs 21 months GDS4019 aging:97	4.38047	0.00281953	Snap25;Alcam;Rtn1;Oxct1;Cacna2d3;Rps2;Crym;Oxr1
Aging_Perturbations_from_GEO_down	Rat liver 11 months vs 24 months GSE11097 aging:200	4.33149	0.00298428	Gamt;Aldh1l1;Tst;Cat;Gstt3;Sord;Pebp1;Hagh
Aging_Perturbations_from_GEO_down	Rat femur 28 weeks vs 54 weeks GDS509 aging:271	4.88781	0.00308554	Hadhb;Got1;Actn2;Ak1;Dnaja2;Vdac1;Park7
Aging_Perturbations_from_GEO_down	Rat hippocampus dentate gyrus 18 months vs 28 months GSE21681 aging:357	4.70652	0.00366916	Snap25;Rtn1;Rps3a;Slc25a5;Crym;Calm2;Dld
Aging_Perturbations_from_GEO_down	Rat posteriorcricoarytenoid 6 months vs 30 months GDS1278 aging:74	3.94833	0.0048839	Got1;Actn2;Ctbp1;Pebp1;Vdac1;Ckb;Pdyn;Hspa1a
Aging_Perturbations_from_GEO_down	Rat hippocampus CA1 18 months vs 28 months GSE21681 aging:354	4.25237	0.00577545	Snap25;Stmn1;Dnaja2;Rps3a;Calm2;Dld;Gpr158
Aging_Perturbations_from_GEO_down	Rat diaphysealfemoralcallus 6 weeks vs 26 weeks GDS1995 aging:115	3.78077	0.00577545	Acan;Gja1;Tf;Stmn1;Rps3a;Ckb;Cox6a1;Oxr1
Aging_Perturbations_from_GEO_down	Rat femur 8 weeks vs 28 weeks GDS509 aging:259	4.23458	0.00577545	Tf;Ctbp1;Stmn1;Rps3a;Crip2;Ckb;Calm2
Aging_Perturbations_from_GEO_down	Rat liver 6 months vs 11 months GSE11097 aging:196	4.1478	0.00639065	Glud1;A1i3;Got1;Rps3a;Hagh;Rps2;Cox6a1
Aging_Perturbations_from_GEO_down	Rat liver 18 months vs 24 months GSE11097 aging:201	3.86252	0.00897015	Cat;Gstt3;Ak4;Crip2;Hagh;Glul;Aldh7a1
Aging_Perturbations_from_GEO_down	Rat hippocampus dentate gyrus 18 months vs 28 months GSE21681 aging:358	3.8478	0.0090607	Snap25;Rtn1;Ctbp1;Rps3a;Slc25a5;Crym;Calm2
Aging_Perturbations_from_GEO_down	Rat femur 8 weeks vs 54 weeks GDS509 aging:265	4.26103	0.0102968	Hadhb;Got1;Ctbp1;Stmn1;Ak1;Ckb
Aging_Perturbations_from_GEO_down	Rat femur 7 weeks vs 53 weeks GDS509 aging:264	4.26103	0.0102968	Got1;Actn2;Ak1;Vdac1;Ckb;Slc25a5
Aging_Perturbations_from_GEO_down	Rat femur 26 weeks vs 52 weeks GDS509 aging:268	4.96399	0.0113305	Got1;Actn2;Rps3a;Hagh;Glul
Aging_Perturbations_from_GEO_down	Rat whiteadipose 4 months vs 28 months GDS3102 aging:126	3.41736	0.0149744	Hadhb;Acly;Dlg2;Cat;Cox6a1;Glul;Dld
Aging_Perturbations_from_GEO_down	Rat liver 4 months vs 12 months GSE11097 aging:190	2.96792	0.0398359	Cat;Gstt3;Glul;Eif1;Aars;Ctsb
Aging_Perturbations_from_GEO_down	Rat femur 30 weeks vs 56 weeks GDS509 aging:272	4.08304	0.0398359	Flot2;Park7;Cdc42bpb;Slc25a5
Aging_Perturbations_from_GEO_down	Rat diaphysealfemoralcallus 6 weeks vs 52 weeks GDS1995 aging:116	3.34338	0.041216	Tf;Stmn1;Rps3a;Ckb;Cox6a1
Aging_Perturbations_from_GEO_down	Rat femur 12 weeks vs 32 weeks GDS509 aging:261	3.17958	0.0488457	Rab5b;Tf;Ctbp1;Stmn1;Hagh
PPI_Hub_Proteins	YWHAB	13.7702	2.11632e-31	Cntfr;Snap25;Aldh1l1;Ncan;Hapln1;Gja1;Grm5;Dpysl4;Flot2;Sbf1;Glul;Actn2;Cacna2d3;Prkca;Rps3a;Srcin1;Sept3;Eef1g;Hadhb;Bcan;Acly;Vcan;Pcca;Vdac1;Slc25a5;Dld;Rala;Rtn1;Ntm;Crmp1;Add3;Nckipsd;Grin2a;Hsph1;Klc2;Epb41l2;Rps2;Camk2g;Gpr158;Atp2b4;Cdc42bpb;L1cam;Glud1;Ehd3;Dlg2;Gnb2;Dnaja2;Aak1;Cspg5;Hspa1a
PPI_Hub_Proteins	GRIN2B	14.3123	2.31367e-12	Snap25;Rala;Rtn1;Actn2;Atp2b4;Prkca;L1cam;Grin2a;Grm5;Klc2;Dlg2;Gnb2;Gnb1;Vdac1;Slc25a5;Glul;Camk2g;Mapk3
PPI_Hub_Proteins	DLG4	9.30198	1.03903e-11	Snap25;Got1;Actn2;Atp2b4;Pebp1;Prkca;Park7;Nckipsd;Eef1g;Glud1;Nsfl1c;Grin2a;Dlg2;Oxct1;Gnb1;Vdac1;Lap3;Slc25a5;Crym;Glul;Dld;Mapk3
PPI_Hub_Proteins	SLC2A4	6.80081	1.5308e-10	Park7;Psmd6;Ppp3r1;Rps2;Camk2g;Uggt1;Rab8b;Ctsb;Mapk3;Rps3a;Hadhb;Acly;Glud1;Tf;Ehd3;Ddah2;Eef1d;Gnb2;Gnb1;Cat;Acot2;Cdh13;Vdac1;Slc25a5;Dld
PPI_Hub_Proteins	GRIN1	10.8298	5.11315e-06	Grin2a;Grm5;Rala;Klc2;Dlg2;Actn2;Atp2b4;L1cam;Mapk3;Hspa1a
PPI_Hub_Proteins	IL7R	11.4066	1.19029e-05	Nsfl1c;Tf;Dbnl;Alb;Pebp1;Psme2;Park7;Mapk3;Hspa1a
PPI_Hub_Proteins	IKBKE	5.2663	2.73132e-05	Btf3;Rps3a;Tpd52l2;Acly;Psmd6;Eef1d;Gnb2;Psme2;Vdac1;Iars;Calm2;Dld;Uggt1;Aars;Hspa1a
PPI_Hub_Proteins	PRKCE	8.20757	3.5103e-05	Hadhb;Gja1;Grm5;Actn2;Prkca;Vdac1;Crip2;Slc25a5;Mapk3;Hspa1a
PPI_Hub_Proteins	SNCA	5.75302	0.000101464	Cntfr;Ndufa12;Ntm;Gnb2;Gnb1;Vdac1;Iars;Cox6a1;Glul;Srcin1;Mapk3;Hspa1a
PPI_Hub_Proteins	PRKCA	4.32487	0.000186737	Snap25;Pebp1;Prkca;L1cam;Add3;Srcin1;Gja1;Grin2a;Tf;Grm5;Eef1d;Kit;Camk2g;Mapk3;Hspa1a
PPI_Hub_Proteins	MAP3K14	7.50014	0.000526171	Glud1;Pebp1;Rps3a;Iars;Rps2;Calm2;Mapk3;Hspa1a
PPI_Hub_Proteins	EGFR	4.34101	0.000555836	Got1;Prkca;Eif1;Ehd1;Eef1g;Alcam;Dnaja2;Slc25a5;Calm2;Camk2g;Snx6;Mapk3;Hspa1a
PPI_Hub_Proteins	CALM1	4.74405	0.000861731	Ppp3r1;Grm5;Rala;Eef1d;Epb41l2;Prkca;Sbf1;Camk2g;Tpd52l2;Rab8b;Sept3
PPI_Hub_Proteins	MAP3K1	6.72693	0.000861731	Hadhb;Glud1;Hsph1;Actn2;Slc25a5;Calm2;Mapk3;Hspa1a
PPI_Hub_Proteins	INSR	6.0972	0.0015477	Ntrk2;Ahsg;Epb41l2;Kit;Prkca;Calm2;Snx6;Mapk3
PPI_Hub_Proteins	231403	4.78495	0.00301279	Btf3;Got1;Eef1d;Stmn1;Vdac1;Iars;Glul;Dld;Aars
PPI_Hub_Proteins	BCL2	7.63053	0.00301279	Ppp3r1;Capn2;Prkca;Vdac1;Mapk3;Hspa1a
PPI_Hub_Proteins	CALM3	6.2351	0.00301279	Grin2a;Ppp3r1;Grm5;Rala;Actn2;Atp2b4;Camk2g
PPI_Hub_Proteins	CDK1	3.28384	0.00306611	Rab5b;Srcin1;Acly;Nsfl1c;Gja1;Grin2a;Grm5;Eef1d;Epb41l2;Gnb2;Stmn1;Gnb1;Aak1;Ubap2l
PPI_Hub_Proteins	GABARAPL2	3.41238	0.00543017	Eef1g;Hadhb;Hsph1;Alb;Aak1;Pebp1;Vdac1;Iars;Ckb;Rps2;Slc25a5;Hspa1a
PPI_Hub_Proteins	MAP1LC3B	4.25777	0.00553091	Eef1g;Hadhb;Hsph1;Eef1d;Alb;Dnaja2;Iars;Slc25a5;Hspa1a
PPI_Hub_Proteins	ESR1	3.09756	0.0108209	Btf3;Tf;Gnb2;Gnb1;Ubap2l;Prkca;Rps3a;Rps2;Slc25a5;Calm2;Mapk3;Hspa1a
PPI_Hub_Proteins	MAPK9	4.77293	0.0108209	Gja1;Dbnl;Stmn1;Crmp1;Prkca;Srcin1;Hspa1a
PPI_Hub_Proteins	GRB2	2.79704	0.0108471	Cntfr;Ntrk2;Ahsg;Rps3a;Cox6a1;Nckipsd;Eef1g;Hadhb;Tf;Kit;Cat;Dnaja2;Dld;Rab8b
PPI_Hub_Proteins	MAP3K3	4.66326	0.0113262	Gnb2;Gnb1;Prkca;Iars;Slc25a5;Calm2;Hspa1a
PPI_Hub_Proteins	PTPN11	5.40384	0.011658	Ntrk2;Kit;Cat;Sirpa;Prkca;Mapk3
PPI_Hub_Proteins	MAP1LC3A	3.5522	0.0145616	Eef1g;Hadhb;Hsph1;Alb;Ckb;Rps2;Slc25a5;Dld;Hspa1a
PPI_Hub_Proteins	HGS	6.20349	0.0152032	Acly;Snap25;Cbs;Crmp1;Rps3a
PPI_Hub_Proteins	GABARAP	3.15598	0.0180718	Eef1g;Hadhb;Hsph1;Cbs;Alb;Iars;Ckb;Rps2;Slc25a5;Hspa1a
PPI_Hub_Proteins	ITGB1	5.85122	0.0181175	Nckipsd;Vcan;Prkca;L1cam;Rab8b
PPI_Hub_Proteins	SGK1	5.57947	0.0212533	Psmd6;Grm5;Prkca;Rps3a;Iars
PPI_Hub_Proteins	PRKCB	3.55963	0.0212533	Gja1;Grm5;Stmn1;Kit;Aak1;Pebp1;Prkca;Add3
PPI_Hub_Proteins	GABARAPL1	3.02377	0.0213186	Eef1g;Hadhb;Tf;Hsph1;Alb;Cat;Rps2;Slc25a5;Dld;Hspa1a
PPI_Hub_Proteins	CDK2	2.69332	0.0216346	Acly;Dlg2;Dbnl;Usp5;Stmn1;Aak1;Pebp1;Crmp1;Add3;Camk2g;Tpd52l2;Mapk3
PPI_Hub_Proteins	NR3C1	4.30345	0.0258651	Ahsg;Epb41l2;Alb;Dnaja2;Mapk3;Hspa1a
PPI_Hub_Proteins	GSK3B	2.60778	0.0261163	Acly;Gja1;Grm5;Klc2;Stmn1;Aak1;Prkca;Add3;Srcin1;Camk2g;Tpd52l2;Mapk3
PPI_Hub_Proteins	MCC	3.5878	0.0312694	Psmd6;Eef1d;Gnb1;Vdac1;Rps3a;Iars;Uggt1
PPI_Hub_Proteins	IRS1	4.76659	0.032529	Ntrk2;Gnb2;Flot2;Prkca;Mapk3
PPI_Hub_Proteins	RPS6KA3	3.19469	0.032529	Acly;Klc2;Epb41l2;Stmn1;Add3;Srcin1;Camk2g;Mapk3
PPI_Hub_Proteins	CAMK2A	4.67362	0.0340722	Grin2a;Grm5;Actn2;Stmn1;Calm2
PPI_Hub_Proteins	ARF6	4.58419	0.0352939	Btf3;Acly;Rala;Iars;Dld
PPI_Hub_Proteins	SQSTM1	4.52642	0.0352939	Hadhb;Ntrk2;Grin2a;Camk2g;Mapk3
PPI_Hub_Proteins	ACTA1	4.52642	0.0352939	Dbnl;Epb41l2;Alb;Prkca;Tln2
PPI_Hub_Proteins	SRRM2	4.49808	0.0352939	Eef1d;Rps3a;Rps2;Mapk3;Hspa1a
PPI_Hub_Proteins	RAF1	4.49808	0.0352939	Gnb2;Pebp1;Prkca;Vdac1;Mapk3
PPI_Hub_Proteins	FOS	4.30913	0.0409295	Eef1d;Prkca;Tln2;Mapk3;Hspa1a
PPI_Hub_Proteins	PRKACB	4.28341	0.0410156	Stmn1;Kit;Crip2;Camk2g;Mapk3
PPI_Hub_Proteins	MAPK1	2.94117	0.0418979	Gja1;Stmn1;Capn2;Aak1;Pebp1;Prkca;L1cam;Mapk3
PPI_Hub_Proteins	MAPK10	4.08815	0.0472397	Grm5;Hsph1;Stmn1;Srcin1;Hspa1a
PPI_Hub_Proteins	DYNLL1	4.06498	0.0473322	Glud1;Ntrk2;Grin2a;Dlg2;Glul
PPI_Hub_Proteins	NFKB2	4.04206	0.0474368	Hadhb;Ctbp1;Rps3a;Iars;Ckb
PPI_Hub_Proteins	PRKG1	4.92657	0.0492382	Kit;Prkca;Crip2;Sept3
PPI_Hub_Proteins	VCL	4.92657	0.0492382	Hadhb;Actn2;Prkca;Tln2

## Sheet: sheet_5
pathway	description	enrichment_ratio	fdr	features
MSigDB_Hallmark_2020	Myc Targets V1	5.28088	2.83158e-06	Hnrnpa3;Rps6;Cul1;Hspe1;Rad23b;Gspt1;Nme1;Hspd1;Prdx3;Ywhaq;Tcp1;Hnrnpa2b1;Hnrnpd;Pgk1;Hprt1;Pabpc1;Hnrnpa1;Ran
MSigDB_Hallmark_2020	Complement	4.9464	5.01146e-06	Dgkg;Usp14;Gmfb;Hspa5;Actn2;Anxa5;Prep;Hpcal4;Cp;Gnai2;C3;Gng2;Ca2;Gnb2;Cdh13;Grb2;Hspa1a
MSigDB_Hallmark_2020	Oxidative Phosphorylation	4.9464	5.01146e-06	Cyb5a;Atp6v1g1;Pdha1;Mdh1;Ndufa5;Mdh2;Ndufa4;Idh2;Etfb;Prdx3;Cs;Hadhb;Glud1;Hadha;Atp6v1e1;Atp6v1d;Slc25a11
MSigDB_Hallmark_2020	Adipogenesis	3.97452	0.000379201	Rtn3;Ndufa5;Mdh2;Aplp2;Coq9;Etfb;C3;Prdx3;Cs;Qdpr;Scp2;Aldh2;Apoe;Ywhag
MSigDB_Hallmark_2020	Protein Secretion	5.41675	0.000868554	Stx12;Arf1;Scrn1;Ap2s1;Gnas;Mapk1;Ap2b1;Rab5a;Gla
MSigDB_Hallmark_2020	Glycolysis	3.66075	0.0010201	Cyb5a;Mdh1;Got1;Hspa5;Mdh2;Ak3;Ak4;Gpc1;Pgk1;Pgls;Aldh7a1;Ppfia4;Lhpp
MSigDB_Hallmark_2020	PI3K/AKT/mTOR Signaling	4.90667	0.00123725	Tiam1;Arf1;Dusp3;Ywhab;Cfl1;Them4;Mapk1;Grb2;Ptpn11
MSigDB_Hallmark_2020	mTORC1 Signaling	3.35193	0.00253769	Qdpr;Hspa5;Got1;Psmc2;Pgk1;Ak4;Hprt1;Add3;Hspe1;Atp6v1d;Gla;Hspd1
MSigDB_Hallmark_2020	heme Metabolism	3.35193	0.00253769	C3;Hebp1;Prdx2;Aldh1l1;Dmtn;Fech;Ca2;Hbb;Blvrb;Pgls;Picalm;Snca
MSigDB_Hallmark_2020	Mitotic Spindle	3.06432	0.00603327	Tiam1;Dlg1;Gsn;Abi1;Flna;Actn4;Hook3;Mapre1;Sptan1;Sptbn1;Pafah1b1
MSigDB_Hallmark_2020	Estrogen Response Late	3.04795	0.00603327	Tiam1;Olfm1;Pcp4;Ca2;Idh2;Atp2b4;Blvrb;Hprt1;Etfb;Add3;Gla
MSigDB_Hallmark_2020	Myogenesis	3.04795	0.00603327	Camk2b;Gabarapl2;Prnp;Gsn;Actn2;Cdh13;Ncam1;Sptan1;Ppfia4;Pfkm;Sirt2
MSigDB_Hallmark_2020	Apical Junction	3.04795	0.00603327	Nlgn3;Cadm3;Dlg1;Actn2;Actn1;Cntn1;Atp1a3;Actn4;Baiap2;Gnai2;Ywhah
MSigDB_Hallmark_2020	Fatty Acid Metabolism	3.15276	0.0114511	Hadhb;Hsph1;Pdha1;Mdh1;Ca2;Mdh2;Bckdhb;Sms;Ywhah
MSigDB_Hallmark_2020	Coagulation	3.20658	0.0154084	C3;Fga;Tf;Gsn;Gnb2;Prep;Capn2;Sirt2
MSigDB_Hallmark_2020	Xenobiotic Metabolism	2.74873	0.0154084	Cyb5a;Ahcy;Aldh2;Gsta3;Ca2;Gad1;Lonp1;Blvrb;Hprt1;Apoe
MSigDB_Hallmark_2020	UV Response Dn	3.06417	0.0180617	Gja1;Dlg1;Celf2;Bckdhb;Kit;Atp2b4;Sri;Add3
MSigDB_Hallmark_2020	Pperoxisome	3.17846	0.0386391	Scp2;Ctbp1;Idh2;Alb;Pabpc1;Ywhah
Aging_Perturbations_from_GEO_up	Rat femur 32 weeks vs 58 weeks GDS509 aging:273	7.25453	6.71904e-23	Gsk3a;Rpl3;Hibadh;Cd81;Ywhab;Pebp1;Rpl8;Rpl18a;Ppp2r1a;Tmsb4x;Cfl1;Capn2;Flot1;Flot2;Ywhag;Rps7;Rps8;Aplp2;Anxa5;Actn4;Pdyn;Sirt2;Hadhb;Rpl26;Tln1;Ptma;Slc25a11;Arf5;Ctbp1;Twf1;Slc3a2;Gnai2;Prdx2;Gpc1;Lmna;Apoe;Atp6v1d;Mapk3;Vat1;Prnp;Pdha1;Eef2;S100b;Hspe1;Hnrnpab;Cs;Hnrnpk;Gnb2;Hnrnpa2b1;Gnas;Dynlrb1
Aging_Perturbations_from_GEO_up	Rat liver 6 months vs 11 months GSE11097 aging:196	8.08576	3.44521e-21	Rpl5;Arf1;Aldh1l1;Ahcy;Hibadh;Fech;Ndufa12;Cd81;Cisd1;Gstt3;Hbb;Pebp1;Etfb;Hspd1;C3;Hebp1;Sh3bgrl;Alcam;Hsph1;Tmsb4x;Apoe;Prodh;Atp6v1d;Skp1;Atp6v1g1;Rps7;Rps8;Ndufa4;Rps6;Idh2;Bckdhb;Hba1;Hspe1;Qdpr;Gsta3;Sub1;Tcp1;Alb;Hprt1;Pabpc1;Aldh7a1;Calm2;Ran
Aging_Perturbations_from_GEO_up	Rat frontalcortex 4 months vs 22 months GDS3939 aging:99	9.11126	1.85634e-20	Rpl5;Brsk1;Rpl3;Rpl32;Cnp;Cd81;Hpca;Hbb;Rpl8;C3;Rpl18a;S100a16;Tmsb4x;Rpl35;Apoe;Crym;Prnp;Dusp3;Gsn;Mdh1;Rps7;Rps8;Rps6;Ptpn11;Hba1;Sept4;S100b;Ermn;Qdpr;Tf;Rps29;Etl4;Gnas;Rps20;Rpl26;Calm2;Ptma;Pfdn5
Aging_Perturbations_from_GEO_up	Rat hippocampus dentate gyrus 18 months vs 28 months GSE21681 aging:358	7.87782	1.43508e-19	Camk2b;Brsk1;Cnp;Ndufa12;Ptprn;Hpca;Cisd1;Pebp1;Atp1a3;Aqp4;Prdx2;Uchl1;Rpl18a;Ppp2r1a;Basp1;Atp5e;Tmsb4x;Cfl1;Ckmt1b;Rpl35;Apoe;Pdia3;Dusp3;Slc6a17;Got1;Mink1;Hba1;Eef2;Sept4;Hspe1;S100b;Sirt2;Rab11b;Qdpr;Tf;Pcp4;Rps29;Gnb2;Rps20;Rpl26
Aging_Perturbations_from_GEO_up	Rat femur 27 weeks vs 53 weeks GDS509 aging:270	6.82405	6.81968e-19	Arf1;Rpl3;Cd81;Ywhab;Twf1;Slc3a2;Rpl8;Hapln1;Gnai2;Prdx2;Acan;Rpl18a;Ywhaq;Ppp2r1a;Basp1;Tmsb4x;Gpc1;Lmna;Ap2s1;Capn2;Flot1;Rpl35;Ywhah;Mapk3;Vat1;Pdia3;Gabarapl2;Prnp;Rps7;Actn4;Pdyn;Eef2;Hnrnpab;Hnrnpk;Prkar1a;Gnb2;Gnas;Rpl26;Tln1;Calm2;Ptma;Arf5;Picalm
Aging_Perturbations_from_GEO_up	Rat liver 18 months vs 24 months GSE11097 aging:201	7.6047	9.62764e-19	Rpl5;Rpl3;Rpl32;Anp32a;A1i3;Ndufa12;Hbb;Pebp1;Atp5h;Rpl8;Hspd1;C3;Hebp1;Atp5b;Alcam;Hsph1;Rpl18a;Pgk1;Rpl35;Ywhag;Mdh1;Rps7;Hspa5;Rps8;Rps6;Hba1;Eef2;Hspe1;Hnrnpab;Tf;Rps29;Gsta3;Sub1;Csde1;Rps20;Rpl26;Hprt1;Pabpc1;Ran
Aging_Perturbations_from_GEO_up	Rat hippocampus CA1 18 months vs 28 months GSE21681 aging:354	7.23722	1.54926e-18	Camk2b;Brsk1;Cnp;Cd81;Ptprn;Hpca;Pebp1;Atp1a3;Rasal1;Slc3a2;Uchl1;Gng3;Alcam;Rpl18a;Camkv;Aldh2;Ppp2r1a;Basp1;Atp5e;Tmsb4x;Cfl1;Ckmt1b;Rpl35;Apoe;Marcksl1;Got1;Mink1;Hba1;Ap2b1;Sept4;Sirt2;Rab11b;Qdpr;Tf;Rps29;Ivd;Gnb2;Nptxr;Gstm5;Shank1
Aging_Perturbations_from_GEO_up	Rat femur 30 weeks vs 56 weeks GDS509 aging:272	6.25577	1.72179e-18	Rpl5;Arf1;Rpl3;Ctbp1;Cd81;Ywhab;Ak3;Gnai2;Prdx3;Prdx2;Atp5b;Acan;Rpl18a;Aldh2;Ppp2r1a;Atp5e;Tmsb4x;Gpc1;Lmna;Cfl1;Pgk1;Flot1;Rpl35;Atp6v1d;Ywhag;Ywhah;Vat1;Gabarapl2;Prnp;Rps7;Actn2;Aplp2;Pdyn;Eef2;Hnrnpab;Sirt2;Hnrnpk;Prkar1a;Rps29;Gnb2;Hnrnpa2b1;Tln1;Calm2;Ptma;Arf5
Aging_Perturbations_from_GEO_up	Rat femur 6 weeks vs 52 weeks GDS509 aging:263	6.57255	2.91661e-17	Rpl5;Akr1b1;Dbi;Atp5h;Hspd1;Prdx2;Gja1;Rpl18a;Ppp2r1a;Tmsb4x;Gpc1;Lmna;Pgk1;Rpl35;Ywhag;Mapk3;Vat1;Pdia3;Gabarapl2;Hnrnpa3;Pdha1;Rps7;Hspa5;Ndufa5;Ndufa4;Rps6;Eef2;Nme1;Fkbp1a;Csde1;Psmc2;Dnaja2;Hyou1;Hprt1;Rpl26;Aldh7a1;Calm2;Ptma;Slc25a11;Picalm
Aging_Perturbations_from_GEO_up	Rat femur 12 weeks vs 58 weeks GDS509 aging:267	6.0174	3.31628e-17	Arf1;Rpl3;Cd81;Ywhab;Pebp1;Slc3a2;Gnai2;Prdx3;Acan;Rpl18a;Ywhaq;Ppp2r1a;Tmsb4x;Gpc1;Lmna;Ap2s1;Capn2;Flot1;Rpl35;Apoe;Atp6v1d;Ywhag;Vat1;Pdia3;Prnp;Hnrnpa3;Pdha1;Rps7;Mdh2;Aplp2;Anxa5;Actn4;Pdyn;Eef2;Sirt2;Fkbp1a;Gnb2;Gnas;Rpl26;Tln1;Calm2;Ptma;Slc25a11
Aging_Perturbations_from_GEO_up	Rat femur 7 weeks vs 53 weeks GDS509 aging:264	6.45755	4.60976e-17	Camk2b;Arf1;Rpl3;Cd81;Ywhab;Twf1;Slc3a2;Rpl8;Gnai2;Prdx2;Acan;Rpl18a;Ppp2r1a;Basp1;Tmsb4x;Gpc1;Lmna;Ap2s1;Capn2;Rpl35;Apoe;Ywhag;Ywhah;Vat1;Pdia3;Gabarapl2;Prnp;Anxa5;Pdyn;Eef2;Hnrnpab;Hnrnpk;Prkar1a;Rps29;Gnb2;Gnas;Rpl26;Calm2;Ptma;Arf5
Aging_Perturbations_from_GEO_up	Rat femur 26 weeks vs 52 weeks GDS509 aging:269	7.04908	5.16655e-17	Rpl5;Arf1;Atp5a1;Hbb;Ak3;Sri;Rpl8;Prdx3;Gja1;Rpl18a;Tmsb4x;Lmna;Cfl1;Pgk1;Ncam1;Apoe;Atp6v1d;Ywhag;Vat1;Hnrnpa3;Rps7;Actn2;Rps6;Eef2;Hnrnpab;Sirt2;Hnrnpk;Prkar1a;Rps29;Csde1;Psmc2;Hnrnpa2b1;Rpl26;Calm2;Ptma;Slc25a11;Picalm
Aging_Perturbations_from_GEO_up	Rat femur 28 weeks vs 54 weeks GDS509 aging:271	6.37065	1.47397e-16	Rpl5;Arf1;Rpl3;Cd81;Ywhab;Slc3a2;Rpl8;Gnai2;Acan;Rpl18a;Ywhaq;Ppp2r1a;Tmsb4x;Gpc1;Lmna;Rpl35;Apoe;Atp6v1d;Ywhag;Ywhah;Vat1;Pdia3;Prnp;Hnrnpa3;Rps7;Rps8;Anxa5;Rps6;Hnrnpab;Sirt2;Nme1;Glud1;Hnrnpk;Hnrnpa2b1;Gnas;Atp6v1b2;Rpl26;Calm2;Ptma
Aging_Perturbations_from_GEO_up	Rat liver 6 months vs 24 months GSE11097 aging:198	6.67728	5.37908e-16	Rpl5;Rpl3;Rpl32;Ndufa12;Hbb;Pebp1;Dbi;Rpl8;Hspd1;C3;Hebp1;Sh3bgrl;Alcam;Rpl18a;Tmsb4x;Sptan1;Atp6v1d;Fga;Rps7;Hspa5;Rps8;Rps6;Hba1;Eef2;Hspe1;Cp;Hnrnpab;Tf;Sub1;Alb;Rps20;Rpl26;Hprt1;Pabpc1;Calm2;Ran
Aging_Perturbations_from_GEO_up	Rat femur 8 weeks vs 54 weeks GDS509 aging:265	6.06362	1.32207e-15	Rpl5;Cd81;Ywhab;Pebp1;Ak3;Rpl8;Prdx3;Acan;Rpl18a;Ywhaq;Ppp2r1a;Tmsb4x;Gpc1;Lmna;Capn2;Pgk1;Rpl35;Apoe;Atp6v1d;Ywhag;Ywhah;Vat1;Prnp;Hspa5;Actn2;Anxa5;Rps6;Eef2;Sirt2;Fkbp1a;Prkar1a;Csde1;Gnb2;Gnas;Rpl26;Tln1;Calm2;Ptma
Aging_Perturbations_from_GEO_up	Rat hippocampus CA1 18 months vs 28 months GSE21681 aging:353	6.6068	1.69111e-15	Camk2b;Brsk1;Hibadh;Cnp;Cd81;Hpca;Pebp1;Atp1a3;Aqp4;Slc3a2;C3;Uchl1;Gng3;Rpl18a;Ppp2r1a;Basp1;Atp5e;Tmsb4x;Cfl1;Rpl35;Apoe;Sptan1;Pdia3;Got1;Mink1;Hba1;Ap2b1;Sept4;Sirt2;Rab11b;Qdpr;Tf;Rps29;Rps20;Rpl26
Aging_Perturbations_from_GEO_up	Rat hippocampus dentate gyrus 18 months vs 28 months GSE21681 aging:357	6.11749	2.30563e-15	Brsk1;Hibadh;Cnp;Ndufa12;Ptprn;Cisd1;Hbb;Atp1a3;Aqp4;Hspd1;Prdx2;Uchl1;Gng3;Aldh2;Ppp2r1a;Atp5e;Tmsb4x;Rpl35;Pdia3;Dusp3;Got1;Anxa5;Mink1;Hba1;Ap2b1;Sept4;Sirt2;Rab11b;Qdpr;Tf;Pcp4;Rps29;Gnb2;Cdh13;Rpl26;Dynlrb1;Gstm5
Aging_Perturbations_from_GEO_up	Rat extensordigitorumlongusmuscles 6 months vs 30 months GDS1279 aging:70	6.47309	2.792e-15	Camk2b;Rpl5;Aldh1l1;Rpl3;Cd81;Gnai2;Prdx3;Rpl18a;Aldh2;Ppp2r1a;Tmsb4x;Gpc1;Lmna;Ap2s1;Rpl35;Ncam1;Apoe;Atp6v1d;Ywhah;Gabarapl2;Prnp;Actn2;Rps8;Anxa5;Atpif1;Rps6;Eef2;Fkbp1a;Hnrnpk;Prkar1a;Rps29;Rpl26;Tln1;Ptma;Arf5
Aging_Perturbations_from_GEO_up	Rat thoracicaorta 3 months vs 6 months GDS3077 aging:119	5.85952	3.07303e-15	Rpl5;Arf1;Hibadh;Cd81;Atp5a1;Dbi;Atp5h;Rpl8;Hspd1;Hsph1;Aldh2;Atp5e;Tmsb4x;Lmna;Pgk1;Rpl35;Ywhag;Prnp;Cyb5a;Mdh1;Rps7;Ndufa5;St13;Mdh2;Rps8;Ndufa4;Anxa5;Rps6;S100b;Hspe1;Qdpr;Hnrnpk;Rps29;Hnrnpa2b1;Alb;Rpl26;Aldh7a1;Gstm5
Aging_Perturbations_from_GEO_up	Rat thoracicaorta 6 months vs 15 months GDS3077 aging:122	6.90543	3.07303e-15	Ahcy;Ywhab;Hbb;Akr1b1;Ak3;Dbi;Gnai2;Prdx2;Uchl1;Cfl1;Capn2;Flot1;Rpl35;Flot2;Sptan1;Sh3gl1;Ywhah;Mapk3;Rps8;Aplp2;Idh2;Actn4;Hba1;S100b;Hnrnpab;Cs;Csde1;Gnb2;Alb;Rpl26;Dynlrb1;Tln1;Ptma
Aging_Perturbations_from_GEO_up	Rat femur 10 weeks vs 56 weeks GDS509 aging:266	5.95604	4.31343e-15	Rpl5;Arf1;Ctbp1;Cd81;Ywhab;Gnai2;Prdx2;Acan;Rpl18a;Ppp2r1a;Tmsb4x;Gpc1;Lmna;Cfl1;Flot1;Rpl35;Apoe;Atp6v1d;Ywhag;Vat1;Pdia3;Prnp;Rps7;Actn2;Anxa5;Actn4;Pdyn;Eef2;Sirt2;Fkbp1a;Hadha;Prkar1a;Gnb2;Gnas;Rpl26;Arf5;Picalm
Aging_Perturbations_from_GEO_up	Rat hippocampus CA3 18 months vs 28 months GSE21681 aging:356	5.88182	1.37511e-14	Camk2b;Brsk1;Hibadh;Ywhab;Ptprn;Wipf3;Hpca;Cisd1;Pebp1;Atp1a3;Rasal1;Uchl1;Gng3;Rpl18a;Camkv;Ppp2r1a;Basp1;Atp5e;Tmsb4x;Cfl1;Ap2s1;Ckmt1b;Rpl35;Apoe;Sptan1;Got1;Mink1;Hba1;Ap2b1;Hpcal4;Sirt2;Rab11b;Rps29;Gnb2;Rpl26;Scg2
Aging_Perturbations_from_GEO_up	Rat femur 26 weeks vs 52 weeks GDS509 aging:268	5.32683	2.0154e-14	Rpl5;Arf1;Rpl3;Ctbp1;Ywhab;Sri;Rpl8;Gnai2;Hspd1;C3;Prdx2;Rpl18a;Aldh2;Tmsb4x;Lmna;Cfl1;Rpl35;Ywhag;Ywhah;Mapk3;Pdia3;Prnp;Cyb5a;Hnrnpa3;Rps7;Rps8;Rps6;Hnrnpab;Tf;Hnrnpk;Gnb2;Hnrnpa2b1;Hprt1;Rpl26;Dynlrb1;Tln1;Calm2;Ptma;Slc25a11
Aging_Perturbations_from_GEO_up	Rat extraocularmuscles 6 months vs 30 months GDS1279 aging:72	6.16603	2.08533e-14	Camk2b;Rpl5;Hbb;Akr1b1;Dbi;Hspd1;C3;Prdx2;Rpl18a;Aldh2;Atp5e;Tmsb4x;Apoe;Atp6v1d;Ywhah;Prnp;Cyb5a;Rps8;Ndufa4;Aplp2;Atpif1;Hba1;Eef2;Hspe1;Sirt2;Hadha;Rps29;Csde1;Dnaja2;Padi2;Rpl26;Calm2;Ptma;Pfkm
Aging_Perturbations_from_GEO_up	Rat posteriorcricoarytenoid 6 months vs 30 months GDS1278 aging:74	6.49968	8.36238e-14	Camk2b;Rpl3;Anp32a;Hibadh;Hbb;Ak3;Dbi;Slc3a2;Gnai2;Rpl18a;Tmsb4x;Cfl1;Rpl35;Apoe;Sh3gl1;Prnp;Hnrnpa3;Rps7;Rps8;Anxa5;Rps6;Hba1;Hspe1;Rab11b;Hadhb;Ppp1r1a;Csde1;Gnas;Rpl26;Dynlrb1;Ptma
Aging_Perturbations_from_GEO_up	Rat hippocampus CA3 18 months vs 28 months GSE21681 aging:355	5.96753	1.12814e-13	Camk2b;Brsk1;Ptprn;Wipf3;Hpca;Atp1a3;Aqp4;C3;Uchl1;Gng3;Alcam;Rpl18a;Camkv;Ppp2r1a;Atp5e;Tmsb4x;Cfl1;Flot1;Rpl35;Apoe;Sptan1;Pdia3;Slc6a17;Got1;Mdh2;Hba1;Hpcal4;Sirt2;Rab11b;Pcp4;Rps29;Gnb2;Scg2
Aging_Perturbations_from_GEO_up	Rat femur 6 weeks vs 52 weeks GDS509 aging:262	5.98873	2.36391e-13	Ctbp1;Hbb;Slc3a2;Sri;Gnai2;C3;Prdx2;Aldh2;Flot1;Ywhag;Sh3gl1;Ywhah;Mapk3;Gabarapl2;Prnp;Cyb5a;Hnrnpa3;Rps8;Idh2;Hba1;S100b;Hnrnpab;Nme1;Hadhb;Tf;Hnrnpk;Csde1;Hnrnpa2b1;Hprt1;Dynlrb1;Pfkm;Arf5
Aging_Perturbations_from_GEO_up	Rat liver 4 months vs 24 months GSE11097 aging:191	5.77569	2.43243e-13	Rpl5;Rpl3;Rpl32;Dbi;Slc3a2;Rpl8;Rpl18a;Ywhaq;Rpl35;Apoe;Atp6v1d;Rps7;Ahsg;Mdh2;Rps8;Rps6;Cp;Hnrnpab;Hadhb;Glud1;Tf;Hnrnpk;Rps29;Sub1;Fabp7;Tcp1;Alb;Pccb;Rps20;Rpl26;Hprt1;Calm2;Ran
Aging_Perturbations_from_GEO_up	Rat diaphysealfemoralcallus 26 weeks vs 52 weeks GDS1995 aging:117	5.06219	3.36138e-13	Arf1;Rnh1;Hibadh;Ctbp1;Cd81;Ywhab;Slc3a2;Sri;Gnai2;Prdx3;Prdx2;Gja1;Ppp2r1a;Basp1;Tmsb4x;Flot2;Apoe;Mapk3;Gabarapl2;Pdha1;Rps7;Rps8;Anxa5;Idh2;Pdyn;Eef2;Hspe1;Hnrnpab;Rab11b;Hadhb;Tf;Hnrnpk;Dynlrb1;Tln1;Calm2;Ptma;Arf5
Aging_Perturbations_from_GEO_up	Rat femur 6 weeks vs 26 weeks GDS509 aging:257	5.56092	5.98251e-13	Rpl3;Ahcy;Ctbp1;Akr1b1;Pebp1;Dbi;Atp5h;Hspd1;Prdx2;Ppp2r1a;Gpc1;Lmna;Rpl35;Flot2;Ywhag;Pdia3;Pdha1;Mdh1;Rps7;Hspa5;Ndufa5;Ndufa4;Anxa5;Atpif1;Hspe1;Nme1;Fkbp1a;Dnaja2;Hyou1;Rpl26;Dynlrb1;Aldh7a1;Calm2
Aging_Perturbations_from_GEO_up	Rat femur 12 weeks vs 32 weeks GDS509 aging:261	5.44275	9.89457e-13	Camk2b;Rpl5;Arf1;Rpl3;Pebp1;Prdx3;Atp5b;Acan;Aldh2;Ppp2r1a;Atp5e;Tmsb4x;Gpc1;Lmna;Ap2s1;Rpl35;Apoe;Pdia3;Hnrnpa3;Ndufa5;Actn2;Mdh2;Anxa5;Idh2;Eef2;Fkbp1a;Hadha;Ivd;Gnb2;Gnas;Atp6v1b2;Tln1;Pfkm
Aging_Perturbations_from_GEO_up	Rat liver 12 months vs 24 months GSE11097 aging:194	5.68716	1.61259e-12	Rpl5;Rpl3;Rpl32;Dbi;Slc3a2;Rpl8;Rpl18a;Atp5e;Rpl35;Atp6v1d;Fga;Rps7;Rps8;Rps6;Eef2;Cp;Hnrnpab;Hadhb;Glud1;Hnrnpk;Rps29;Gsta3;Sub1;Fabp7;Tcp1;Psmc2;Alb;Rps20;Rpl26;Hprt1;Ran
Aging_Perturbations_from_GEO_up	Rat heart 4 months vs 28 months GDS3102 aging:125	5.86499	4.0617e-12	Rpl5;Rpl3;Rpl32;Ndufa12;Cd81;Hbb;Rpl8;Rpl18a;Tmsb4x;Gpc1;Rpl35;Apoe;Crym;Sptan1;Atp6v1d;Skp1;Prnp;Rps7;Rps8;Anxa5;Atpif1;Rps6;Hba1;Rps29;Rps20;Rpl26;Pabpc1;Dynlrb1;Calm2
Aging_Perturbations_from_GEO_up	Rat thoracicaorta 3 months vs 15 months GDS3077 aging:120	5.16853	6.51559e-12	Rpl5;Ahcy;Hibadh;Akr1b1;Ak3;Dbi;Atp5h;Rpl8;Gnai2;Prdx2;Uchl1;Aldh2;Tmsb4x;Capn2;Rpl35;Sptan1;Prnp;Mdh1;Ndufa5;Mdh2;Rps8;Ndufa4;Aplp2;Idh2;S100b;Rab11b;Hnrnpk;Csde1;Alb;Rpl26;Tln1;Ptma
Aging_Perturbations_from_GEO_up	Rat liver 11 months vs 24 months GSE11097 aging:200	5.45626	1.94425e-11	Rpl5;Rpl3;Rpl32;A1i3;Dbi;Rpl8;C3;Hebp1;Alcam;Rpl18a;Tmsb4x;Sptan1;Fga;Rps7;Hspa5;Rps8;Rps6;Hba1;Eef2;Hspe1;Cp;Hnrnpab;Tf;Sub1;Rps20;Rpl26;Pabpc1;Calm2;Ran
Aging_Perturbations_from_GEO_up	Rat liver 4 months vs 12 months GSE11097 aging:190	5.60481	2.3502e-11	Ahcy;A1i3;Ndufa12;Hbb;Dbi;Atp5h;Rpl8;Atp5l;C3;Hebp1;Scp2;Rpl18a;Ywhaq;Tmsb4x;Apoe;Prodh;Skp1;Mdh1;Got1;Ahsg;Ndufa4;Anxa5;Qdpr;Glud1;Tf;Pccb;Aldh7a1;Calm2
Aging_Perturbations_from_GEO_up	Rat liver 4 months vs 24 months GSE11097 aging:193	5.2901	3.62665e-11	Rpl5;Arf1;Cd81;Ak4;Dbi;Etfb;Atp5l;C3;Hebp1;Alcam;Scp2;Aldh2;Tmsb4x;Rpl35;Skp1;Fga;Mdh1;Rps7;Rps6;Eef2;Cp;Fkbp1a;Tf;Sub1;Alb;Pccb;Rps20;Pabpc1;Calm2
Aging_Perturbations_from_GEO_up	Rat hippocampus 7 months vs 21 months GDS4019 aging:98	5.68484	3.86281e-11	Cntnap1;Rpl32;Ndufa11;Cnp;Cd81;Hbb;C3;Sh3bgrl;Scp2;Rpl18a;Ywhaq;Capn2;Rpl35;Atp6v1d;Opcml;Mapk3;Prnp;Dusp3;Gsn;Hba1;Sept4;S100b;Qdpr;Tf;Sub1;Dynlrb1;Calm2
Aging_Perturbations_from_GEO_up	Rat diaphysealfemoralcallus 6 weeks vs 52 weeks GDS1995 aging:116	4.89054	4.51289e-11	Camk2b;Arf1;Rnh1;Ctbp1;Cd81;Pebp1;Atp5b;Aldh2;Ppp2r1a;Atp5e;Gpc1;Flot1;Apoe;Vat1;Pdha1;Mdh1;Actn2;Mdh2;Idh2;Pdyn;Eef2;Sirt2;Cs;Hadhb;Csde1;Gnb2;Gnas;Dynlrb1;Slc25a11;Pfkm;Arf5
Aging_Perturbations_from_GEO_up	Rat liver 12 months vs 24 months GSE11097 aging:195	5.16761	5.57793e-11	Rpl5;Ahcy;Hibadh;A1i3;Cd81;Hbb;Ak4;Dbi;Etfb;Hspd1;C3;Hebp1;Alcam;Scp2;Aldh2;Atp6v1d;Skp1;Fga;Mdh1;Anxa5;Rps6;Hba1;Cp;Qdpr;Tf;Sub1;Pccb;Aldh7a1;Calm2
Aging_Perturbations_from_GEO_up	Rat thoracicaorta 6 months vs 28 months GDS3077 aging:123	5.799	5.64735e-11	Hbb;Akr1b1;Rpl8;Gnai2;Uchl1;Rpl18a;Tmsb4x;Cfl1;Capn2;Rpl35;Sptan1;Ywhah;Mapk3;Prnp;Rps7;Rps8;Aplp2;Actn4;Hba1;Eef2;Csde1;Gnb2;Rpl26;Tln1;Ptma;Hspa1a
Aging_Perturbations_from_GEO_up	Rat femur 6 weeks vs 26 weeks GDS509 aging:256	6.43498	1.74101e-09	Camk2b;Gabarapl2;Ndufa5;Mdh1;Idh2;Hbb;Slc3a2;Hba1;Hadhb;Prdx2;Ppp1r1a;Rps29;Csde1;Padi2;Flot2;Apoe;Dynlrb1;Pfkm;Sh3gl1;Snca
Aging_Perturbations_from_GEO_up	Rat diaphysealfemoralcallus 6 weeks vs 26 weeks GDS1995 aging:115	5.05037	3.15537e-09	Vat1;Camk2b;Pdha1;Mdh1;Actn2;Mdh2;Ndufa4;Idh2;Pebp1;Eef2;Sirt2;Atp5b;Aldh2;Ppp2r1a;Atp5e;Csde1;Gpc1;Lmna;Gnas;Rpl35;Apoe;Dynlrb1;Slc25a11;Pfkm
Aging_Perturbations_from_GEO_up	Rat whiteadipose 4 months vs 28 months GDS3102 aging:126	4.57381	3.44384e-08	Rpl5;Prnp;Rpl3;Rpl32;Rps7;Rps8;Anxa5;Rps6;Hbb;Hba1;Rpl8;Rpl18a;Rps29;Hnrnph1;Oxct1;Sub1;Tmsb4x;Rpl35;Rps20;Rpl26;Hprt1;Apoe;Calm2
Aging_Perturbations_from_GEO_up	Rat ventricle 4 months vs 21 months GDS399 aging:112	4.9692	3.70535e-08	Rpl5;Prnp;Rpl3;Hibadh;Rps7;Mdh2;Rps8;Ndufa4;Atpif1;Anxa5;Rps6;Hbb;Hba1;Rpl8;Hadhb;Rpl18a;Rps29;Sub1;Rpl26;Apoe;Ptma
Aging_Perturbations_from_GEO_up	Rat hippocampus 7 months vs 21 months GDS4019 aging:97	4.33153	4.33126e-08	Dusp3;Gsn;Rps7;Cnp;Hbb;Anxa11;Arhgap39;Slc3a2;Ptpn11;Hba1;Pdyn;Sept4;S100b;Ermn;C3;Qdpr;Tf;Bag5;Scp2;Capn2;Rps20;Calm2;Ptma;Ywhag
Aging_Perturbations_from_GEO_up	Rat femur 10 weeks vs 30 weeks GDS509 aging:260	4.96266	7.75747e-08	Pdia3;Camk2b;Ndufa4;Anxa5;Hbb;Akr1b1;Slc3a2;Hba1;Pdyn;Eef2;Fkbp1a;Acan;Tmsb4x;Gpc1;Lmna;Gnas;Flot1;Rpl35;Apoe;Dynlrb1
Aging_Perturbations_from_GEO_up	Rat thoracicaorta 15 months vs 28 months GDS3077 aging:124	4.44595	1.0123e-07	Vat1;Pdia3;Prnp;Rps7;Rps8;Ywhab;Akr1b1;Rpl8;Eef2;Gnai2;Tf;Uchl1;Rpl18a;Rps29;Tmsb4x;Rpl35;Rpl26;Apoe;Tln1;Calm2;Sptan1;Mapk3
Aging_Perturbations_from_GEO_up	Rat femur 7 weeks vs 27 weeks GDS509 aging:258	4.23594	2.13624e-07	Vat1;Camk2b;Cyb5a;Hnrnpa3;Cd81;Rps8;Anxa5;Rps6;Acan;Rpl18a;Aldh2;Prkar1a;Rps29;Basp1;Gpc1;Lmna;Capn2;Gnas;Rpl35;Apoe;Dynlrb1;Ywhah
Aging_Perturbations_from_GEO_up	Rat liver 4 months vs 12 months GSE11097 aging:192	3.94851	6.26299e-07	Rpl5;Fga;Arf1;Rpl32;Ndufa11;Rps7;Dbi;Eef2;Cp;C3;Tf;Sh3bgrl;Alcam;Rpl18a;Tmsb4x;Psmc2;Alb;Rpl35;Flna;Rps20;Calm2;Skp1
Aging_Perturbations_from_GEO_up	Rat thoracicaorta 3 months vs 28 months GDS3077 aging:121	3.93515	6.55295e-07	Rpl5;Prnp;Rps7;Rps8;Aplp2;Rps6;Akr1b1;Actn4;Rpl8;Gnai2;Rab11b;Uchl1;Hnrnpk;Rpl18a;Aldh2;Rps29;Tmsb4x;Rpl35;Rpl26;Tln1;Sptan1;Ptma
Aging_Perturbations_from_GEO_up	Rat femur 8 weeks vs 28 weeks GDS509 aging:259	3.76783	7.30893e-07	Camk2b;Prnp;Ndufa5;Actn2;Ndufa4;Eef2;Prdx3;Fkbp1a;Atp5e;Csde1;Gpc1;Gnb2;Lmna;Dnaja2;Pgk1;Gnas;Rpl35;Rpl26;Apoe;Dynlrb1;Slc25a11;Pfkm;Ywhag
Aging_Perturbations_from_GEO_up	Rat liver 6 months vs 18 months GSE11097 aging:197	3.7586	2.22993e-06	Rpl5;Rps7;Rps8;Rps6;Gstt3;Hbb;Hba1;Cp;Hspd1;C3;Fkbp1a;Sh3bgrl;Sub1;Tmsb4x;Rpl26;Hprt1;Pabpc1;Aldh7a1;Calm2;Sptan1;Ran
Aging_Perturbations_from_GEO_up	Rat myocardium 18 weeks vs 22 weeks GDS4025 aging:142	3.2069	0.000476571	Ndufa11;Actn2;Ndufa12;Cd81;Idh2;Hba1;Eef2;Prdx2;Rps29;Tmsb4x;Gpc1;Rpl35;Sptan1;Ywhag
Aging_Perturbations_from_GEO_up	Rat liver 11 months vs 18 months GSE11097 aging:199	2.09322	0.0336992	Rpl5;Cyb5a;Rpl18a;Ywhaq;Tmsb4x;Rps6;Rpl26;Eef2;Cp;Calm2;Sptan1
Aging_Perturbations_from_GEO_down	Rat hippocampus 7 months vs 21 months GDS4019 aging:98	9.32842	1.09959e-23	Camk2b;Gpm6a;Brsk1;Ctbp1;Ywhab;Ptprn;Wipf3;Atp5a1;Hpca;Camk2a;Itpr1;Atp1a3;Atp5h;Atp5b;Hsph1;Bag5;Camkv;Tmsb4x;Nefl;Sptan1;Gria3;Ywhag;Ywhah;Snca;Pdha1;Rps7;Got1;Hspa5;Ndufa4;Rps6;Anxa11;Hnrnpab;Glud1;Olfm1;Pcp4;Hnrnpk;Ppp1r1a;Abi1;Rimbp2;Cntn1;Atp6v1b2;Lppr4;Atp6v0d1;Scg2
Aging_Perturbations_from_GEO_down	Rat hippocampus CA3 18 months vs 28 months GSE21681 aging:355	9.28543	3.85328e-20	Rpl5;Gpm6a;Stx12;Rtn3;Usp14;Rpl32;Ctbp1;Atp5a1;Atp5h;Atp5b;Scp2;Ywhaq;Oxct1;Nefm;Atp6v1e1;Crym;Atp6v1d;Ywhag;Skp1;Rgs7;Prnp;Dusp3;Gsn;Mdh1;Hspa5;Rps8;Rps6;Snap91;Nme1;Gap43;Fabp7;Tcp1;Gnas;Atp6v1b2;Hprt1;Sugt1;Calm2
Aging_Perturbations_from_GEO_down	Rat hippocampus CA1 18 months vs 28 months GSE21681 aging:353	8.31939	5.47176e-18	Gpm6a;Stx12;Rtn3;Usp14;Ctbp1;Atp5a1;Itpr1;Rpl8;Scp2;Oxct1;Nefl;Nefm;Atp6v1e1;Crym;Atp6v1d;Ywhag;Skp1;Rgs7;Ywhah;Mdh1;Rps8;Rps6;Hnrnpab;Snap91;Nme1;Pcp4;Gap43;Hnrnpk;Hnrnph1;Tcp1;Atp6v1b2;Hprt1;Dynlrb1;Calm2;Ran
Aging_Perturbations_from_GEO_down	Rat frontalcortex 4 months vs 22 months GDS3939 aging:99	7.38817	6.57454e-18	Camk2b;Gpm6a;Ttyh1;Ywhab;Atp5a1;Camk2a;Atp1a3;Gspt1;Hspd1;Uchl1;Alcam;Hsph1;Oxct1;Mapk1;Nefm;Sptan1;Ywhag;Skp1;Rgs7;Ywhah;Snca;Opcml;Marcksl1;Atp6v1g2;Slc6a17;Got1;Hspa5;Ndufa4;Eef2;Hspe1;Fkbp1a;Glud1;Olfm1;Sub1;Psmc2;Lppr4;Nptxr;Scg2
Aging_Perturbations_from_GEO_down	Rat femur 6 weeks vs 26 weeks GDS509 aging:256	6.40855	1.04897e-17	Rpl5;Arf1;Rpl3;Ctbp1;Cd81;Ywhab;Atp5a1;Rpl8;Gnai2;Hspd1;Atp5b;Rpl18a;Ppp2r1a;Atp5e;Tmsb4x;Gpc1;Lmna;Pgk1;Rpl35;Ywhag;Mapk3;Pdia3;Hnrnpa3;Rps7;Hspa5;Actn2;Rps8;Ndufa4;Anxa5;Rps6;Eef2;Hnrnpab;Tf;Hnrnpk;Sub1;Gnb2;Hnrnpa2b1;Gnas;Rpl26;Tln1;Calm2;Ptma
Aging_Perturbations_from_GEO_down	Rat thoracicaorta 6 months vs 28 months GDS3077 aging:123	7.0735	4.48163e-17	Rpl5;Arf1;Hibadh;Ctbp1;Cd81;Atp5a1;Dbi;Atp5h;Hspd1;Prdx3;Atp5b;Hsph1;Atp5e;Pgk1;Ywhag;Cyb5a;Pdha1;Mdh1;Ndufa5;Mdh2;Ndufa4;Anxa5;Rps6;Idh2;Bckdhb;Hspe1;Cs;Hadhb;Hadha;Hnrnpk;Rps29;Hnrnpa2b1;Gnas;Hprt1;Aldh7a1;Gstm5;Picalm
Aging_Perturbations_from_GEO_down	Rat ventricle 4 months vs 21 months GDS399 aging:112	6.79114	5.43207e-17	Arf1;Ctbp1;Atp5a1;Hpca;Akr1b1;Pebp1;Atp5h;Gnai2;Hspd1;Prdx3;Atp5b;Ppp2r1a;Atp5e;Tmsb4x;Lmna;Cfl1;Pgk1;Flot1;Flot2;Ywhah;Mapk3;Mdh1;Ndufa5;Actn2;Idh2;Pdyn;Eef2;Hspe1;Cs;Fkbp1a;Hadha;Prkar1a;Ivd;Tcp1;Gnas;Dynlrb1;Slc25a11;Pfkm
Aging_Perturbations_from_GEO_down	Rat hippocampus 7 months vs 21 months GDS4019 aging:97	7.78996	6.03185e-17	Usp14;Arf1;Ywhab;Cul1;Atp1a3;Atp5b;Alcam;Oxct1;Cfl1;Flot1;Crym;Sptan1;Atp6v1d;Skp1;Ywhah;Snca;Opcml;Mdh1;Ndufa4;Ap2b1;Hspa12a;Hnrnpab;Snap91;Nme1;Gap43;Hnrnph1;Fabp7;Eif3i;Gnas;Atp6v1b2;Lppr4;Hprt1;Scg2;Ran
Aging_Perturbations_from_GEO_down	Rat myocardium 18 weeks vs 22 weeks GDS4025 aging:142	6.70433	7.41319e-17	Rpl5;Rpl32;Hibadh;Atp5a1;Cisd1;Ola1;Dbi;Atp5h;Etfb;Rpl8;Atp5l;Hspd1;Prdx3;Atp5b;Scp2;Rpl18a;Oxct1;Atp5e;Skp1;Atp6v1g1;Pdha1;Got1;Hspa5;Ndufa5;Rps8;Rps6;Bckdhb;Hspe1;Hadhb;Sub1;Csde1;Cops2;Tcp1;Dnaja2;Rps20;Rpl26;Hprt1;Pfdn6
Aging_Perturbations_from_GEO_down	Rat heart 4 months vs 28 months GDS3102 aging:125	7.36616	8.85114e-17	Hibadh;Ndufa11;Atp5a1;Cisd1;Akr1b1;Pebp1;Etfb;Atp5l;Prdx3;Atp5b;Gja1;Oxct1;Atp5e;Pgk1;Ywhah;Gsn;Pdha1;Mdh1;Got1;Hspa5;Actn2;Mdh2;Ndufa4;Idh2;Bckdhb;Coq9;Hspe1;Cs;Hadhb;Hadha;Hnrnpk;Prkar1a;Psmc2;Ptma;Pfkm
Aging_Perturbations_from_GEO_down	Rat femur 7 weeks vs 27 weeks GDS509 aging:258	6.87912	3.69476e-15	Rpl5;Arf1;Hibadh;Ywhab;Atp5a1;Hbb;Atp5h;Rpl8;Hspd1;Atp5b;Atp5e;Tmsb4x;Pgk1;Flot1;Atp6v1d;Mdh1;Rps7;Got1;Ndufa5;Actn2;Mdh2;Ndufa4;Idh2;Hba1;Hadhb;Hadha;Hnrnpa2b1;Atp6v1b2;Rpl26;Calm2;Ptma;Slc25a11;Pfkm
Aging_Perturbations_from_GEO_down	Rat hippocampus dentate gyrus 18 months vs 28 months GSE21681 aging:357	8.14069	3.73726e-15	Rpl5;Gpm6a;Usp14;Atp5a1;Ola1;Itpr1;Atp5h;Sri;Rpl8;Stxbp6;Crym;Atp6v1d;Ywhag;Skp1;Rgs7;Ywhah;Snca;Prnp;Mdh1;Rps7;Hspa5;Rps6;Snap91;Olfm1;Hnrnpk;Hnrnph1;Tcp1;Atp6v1b2;Calm2
Aging_Perturbations_from_GEO_down	Rat thoracicaorta 6 months vs 15 months GDS3077 aging:122	6.80134	4.69441e-15	Rpl5;Arf1;Atp5a1;Atp5h;Hspd1;Prdx3;Atp5b;Hsph1;Rpl18a;Atp5e;Tmsb4x;Lmna;Pgk1;Apoe;Ywhag;Cyb5a;Pdha1;Mdh1;Rps7;Hspa5;Ndufa5;Mdh2;Anxa5;Rps6;Hspe1;Hadhb;Hadha;Hnrnpk;Rps29;Hnrnpa2b1;Gnas;Calm2;Gstm5
Aging_Perturbations_from_GEO_down	Rat hippocampus CA1 18 months vs 28 months GSE21681 aging:354	7.58445	6.3237e-15	Gpm6a;Stx12;Rtn3;Usp14;Rpl32;Atp5a1;Itpr1;Rpl8;Nefm;Atp6v1e1;Atp6v1d;Ywhag;Skp1;Rgs7;Ywhah;Prnp;Mdh1;Hspa5;Rps8;Rps6;Snap91;Pcp4;Hnrnpk;Hnrnph1;Tcp1;Dnaja2;Atp6v1b2;Hprt1;Calm2;Ran
Aging_Perturbations_from_GEO_down	Rat posteriorcricoarytenoid 6 months vs 30 months GDS1278 aging:74	6.70031	6.52022e-15	Arf1;Ctbp1;Cd81;Ywhab;Atp5a1;Pebp1;Hspd1;Prdx2;Atp5b;Atp5e;Gpc1;Pgk1;Gabarapl2;Nudc;Pdha1;Mdh1;Got1;Ndufa5;Actn2;Mdh2;Ndufa4;Idh2;Bckdhb;Pdyn;Eef2;Rps29;Ivd;Padi2;Slc25a11;Pfkm;Arf5;Hspa1a;Picalm
Aging_Perturbations_from_GEO_down	Rat femur 10 weeks vs 30 weeks GDS509 aging:260	5.71048	1.53745e-13	Arf1;Ctbp1;Cd81;Atp5a1;Ak3;Atp5h;Rpl8;Hspd1;Prdx3;Prdx2;Atp5b;Rpl18a;Atp5e;Pgk1;Hnrnpa1;Ywhah;Gabarapl2;Cyb5a;Hnrnpa3;Ndufa5;Rps8;Rps6;Hspe1;Hnrnpab;Nme1;Hadhb;Tf;Hnrnpk;Rps29;Hnrnpa2b1;Calm2;Ptma;Pfkm;Arf5
Aging_Perturbations_from_GEO_down	Rat thoracicaorta 15 months vs 28 months GDS3077 aging:124	6.07767	3.9836e-13	Rpl5;Ctbp1;Atp5a1;Hbb;Dbi;Atp5h;Hspd1;Prdx3;Atp5b;Aldh2;Atp5e;Capn2;Ywhag;Sh3gl1;Ywhah;Pdha1;Mdh1;Ndufa5;Mdh2;Ndufa4;Idh2;Hba1;Hspe1;Hnrnpab;Cs;Hadhb;Hprt1;Dynlrb1;Aldh7a1;Hspa1a;Picalm
Aging_Perturbations_from_GEO_down	Rat thoracicaorta 3 months vs 28 months GDS3077 aging:121	6.39045	7.28338e-13	Arf1;Ctbp1;Atp5a1;Hbb;Dbi;Atp5h;Hspd1;Prdx3;Atp5b;Hsph1;Atp5e;Flot1;Ywhag;Pdha1;Mdh1;Hspa5;Ndufa5;Mdh2;Ndufa4;Idh2;Bckdhb;Hba1;Hspe1;Cs;Hadhb;Hadha;Gnas;Hspa1a;Picalm
Aging_Perturbations_from_GEO_down	Rat hippocampus CA3 18 months vs 28 months GSE21681 aging:356	7.19994	1.01805e-12	Gpm6a;Rtn3;Usp14;Sec23a;Rpl32;Ctbp1;Atp5a1;Ywhaq;Oxct1;Pgk1;Nefl;Nefm;Atp6v1e1;Atp6v1d;Ywhag;Prnp;Mdh1;Hspa5;Rps6;Snap91;Nme1;Hnrnpk;Dnaja2;Atp6v1b2;Hprt1;Calm2
Aging_Perturbations_from_GEO_down	Rat hippocampus dentate gyrus 18 months vs 28 months GSE21681 aging:358	6.2544	2.80005e-12	Gpm6a;Usp14;Ctbp1;Atp5a1;Ola1;Itpr1;Sri;Ywhaq;Crym;Atp6v1d;Ywhag;Rgs7;Ywhah;Snca;Prnp;Mdh1;Rps7;Hspa5;Gad1;Rps6;Snap91;Nme1;Hnrnpk;Tcp1;Atp6v1b2;Hprt1;Sugt1;Calm2
Aging_Perturbations_from_GEO_down	Rat diaphysealfemoralcallus 6 weeks vs 26 weeks GDS1995 aging:115	5.7002	3.81696e-12	Ywhab;Hbb;Atp5h;Rpl8;Hspd1;Prdx2;Acan;Gja1;Rpl18a;Basp1;Tmsb4x;Atp6v1d;Ywhah;Pdia3;Gabarapl2;Rps7;Rps8;Rps6;Hba1;Hnrnpab;Nme1;Fkbp1a;Tf;Hnrnpk;Sub1;Hnrnpa2b1;Rpl26;Hprt1;Ptma;Gstm5
Aging_Perturbations_from_GEO_down	Rat whiteadipose 4 months vs 28 months GDS3102 aging:126	5.73618	7.42939e-12	Ndufa11;Ywhab;Atp5a1;Cisd1;Dbi;Atp5h;Etfb;Atp5l;Hspd1;Atp5b;Sh3bgrl;Scp2;Aldh2;Pgk1;Ywhag;Skp1;Rgs7;Cyb5a;Pdha1;Mdh1;Hspa5;Ndufa4;Hspe1;S100b;Cs;Hadhb;Fkbp1a;Psmc2;Gnas
Aging_Perturbations_from_GEO_down	Rat thoracicaorta 3 months vs 15 months GDS3077 aging:120	6.73101	9.73939e-12	Arf1;Atp5a1;Hbb;Hspd1;Atp5b;Gja1;Hsph1;Rpl18a;Atp5e;Flot1;Apoe;Ywhah;Pdha1;Hspa5;Hba1;Pdyn;Eef2;Hspe1;Hadhb;Hadha;Tf;Rps29;Gnas;Calm2;Hspa1a
Aging_Perturbations_from_GEO_down	Rat extensordigitorumlongusmuscles 6 months vs 30 months GDS1279 aging:70	5.94703	4.48499e-11	Atp5a1;Hbb;Akr1b1;Rpl8;Prdx2;Atp5b;Atp5e;Pdha1;Mdh1;Rps7;Got1;Ndufa5;Mdh2;Ndufa4;Bckdhb;Hba1;Hspe1;Cs;Glud1;Hadha;Ppp1r1a;Csde1;Padi2;Dynlrb1;Slc25a11;Pfkm
Aging_Perturbations_from_GEO_down	Rat femur 6 weeks vs 26 weeks GDS509 aging:257	6.05005	1.70751e-10	Rpl5;Got1;Actn2;Cd81;Rps8;Atp5a1;Rps6;Hbb;Hba1;Rpl8;Gnai2;Atp5b;Tf;Hnrnpk;Rpl18a;Prkar1a;Rps29;Tmsb4x;Cfl1;Pgk1;Gnas;Atp6v1b2;Apoe;Atp6v1d
Aging_Perturbations_from_GEO_down	Rat diaphysealfemoralcallus 6 weeks vs 52 weeks GDS1995 aging:116	6.28373	2.07507e-10	Pdia3;Rpl5;Hnrnpa3;Hspa5;Rps8;Ywhab;Rps6;Hbb;Hba1;Rpl8;Hnrnpab;Nme1;Hspd1;Prdx2;Tf;Hnrnpk;Rpl18a;Rps29;Sub1;Tmsb4x;Rpl26;Ptma;Ywhah
Aging_Perturbations_from_GEO_down	Rat femur 26 weeks vs 52 weeks GDS509 aging:268	7.72673	3.73367e-10	Camk2b;Gabarapl2;Got1;Ndufa5;Mdh1;Actn2;Mdh2;Atp5a1;Hbb;Hba1;Atp5b;Ppp1r1a;Rps29;Atp5e;Csde1;Gpc1;Gnas;Pfkm;Snca
Aging_Perturbations_from_GEO_down	Rat femur 6 weeks vs 52 weeks GDS509 aging:262	5.46953	4.39704e-10	Rpl5;Arf1;Cd81;Atp5a1;Pebp1;Rpl8;Atp5b;Acan;Rpl18a;Atp5e;Gpc1;Pgk1;Rpl35;Mdh1;Actn2;Mdh2;Ndufa4;Anxa5;Rps6;Eef2;Rps29;Gnas;Rpl26;Calm2;Ptma
Aging_Perturbations_from_GEO_down	Rat liver 11 months vs 18 months GSE11097 aging:199	4.88467	1.72846e-09	Aldh1l1;Ahcy;Anp32a;Hibadh;Ndufa12;Cd81;Cisd1;Gstt3;Pebp1;Atp5l;Atp5e;Pgk1;Apoe;Prodh;Atp6v1d;Mdh1;Ahsg;Ndufa4;Bckdhb;Hspe1;Qdpr;Glud1;Gsta3;Ivd;Fabp7;Tcp1
Aging_Perturbations_from_GEO_down	Rat femur 12 weeks vs 32 weeks GDS509 aging:261	5.64783	2.81848e-09	Gsk3a;Ahcy;Cnp;Ctbp1;Rps8;Ywhab;Ndufa4;Atp5a1;Rps6;Hbb;Atp5h;Hba1;Rpl8;Hnrnpab;Prdx2;Tf;Hnrnpk;Rps29;Flot1;Rpl26;Ptma;Ywhah
Aging_Perturbations_from_GEO_down	Rat femur 28 weeks vs 54 weeks GDS509 aging:271	5.76435	4.64375e-09	Mdh1;Got1;Ndufa5;Actn2;Mdh2;Ndufa4;Idh2;Hbb;Akr1b1;Atp5h;Hba1;Hspd1;Hadhb;Atp5b;Hadha;Ppp1r1a;Atp5e;Dnaja2;Slc25a11;Pfkm;Arf5
Aging_Perturbations_from_GEO_down	Rat liver 4 months vs 24 months GSE11097 aging:193	5.00393	9.47411e-09	Cyb5a;Aldh1l1;Ahcy;Gsn;Got1;Ahsg;Idh2;Gstt3;Hbb;Hba1;Hadhb;Atp5b;Glud1;Rps29;Gsta3;Ivd;Fabp7;Pgk1;Hprt1;Prodh;Crym;Ptma;Pfkm
Aging_Perturbations_from_GEO_down	Rat extraocularmuscles 6 months vs 30 months GDS1279 aging:72	4.97619	2.12702e-08	Gabarapl2;Arf1;Pdha1;Mdh1;Rps7;Ndufa5;Mdh2;Cd81;Ywhab;Atp5a1;Idh2;Atp5h;Gnai2;Hadhb;Glud1;Tf;Prkar1a;Pgk1;Flot1;Dynlrb1;Slc25a11;Hspa1a
Aging_Perturbations_from_GEO_down	Rat femur 8 weeks vs 28 weeks GDS509 aging:259	4.94715	4.72795e-08	Gabarapl2;Arf1;Rpl3;Pdha1;Ctbp1;Rps8;Rps6;Hbb;Slc3a2;Hba1;Hnrnpab;Gnai2;Prdx2;Tf;Hnrnpk;Tmsb4x;Hnrnpa2b1;Atp6v1b2;Calm2;Ptma;Arf5
Aging_Perturbations_from_GEO_down	Rat liver 4 months vs 12 months GSE11097 aging:192	4.60378	7.17911e-08	Aldh1l1;Ahcy;Gsn;Hibadh;A1i3;Got1;Ahsg;Cd81;Ndufa4;Idh2;Cisd1;Hba1;Hspd1;Qdpr;Atp5b;Glud1;Scp2;Ivd;Hprt1;Prodh;Aldh7a1;Pfkm
Aging_Perturbations_from_GEO_down	Rat femur 7 weeks vs 53 weeks GDS509 aging:264	5.29577	7.92139e-08	Mdh1;Got1;Ndufa5;Actn2;Mdh2;Ndufa4;Atp5a1;Idh2;Hbb;Atp5h;Hba1;Atp5b;Hadha;Ppp1r1a;Atp5e;Atp6v1b2;Atp6v1d;Slc25a11;Pfkm
Aging_Perturbations_from_GEO_down	Rat liver 12 months vs 24 months GSE11097 aging:194	4.29763	7.15455e-07	Aldh1l1;Ahcy;Hibadh;Mdh1;A1i3;Got1;Hspa5;Cd81;Ndufa4;Gstt3;Hbb;Pebp1;Atp5h;Hba1;Qdpr;Scp2;Ivd;Prodh;Aldh7a1;Skp1
Aging_Perturbations_from_GEO_down	Rat femur 27 weeks vs 53 weeks GDS509 aging:270	4.97384	8.0072e-07	Cyb5a;Mdh1;Ndufa5;Actn2;Rps8;Ndufa4;Atp5a1;Hbb;Atp5h;Hba1;Aldh2;Rps29;Atp5e;Apoe;Dynlrb1;Atp6v1d;Pfkm
Aging_Perturbations_from_GEO_down	Rat thoracicaorta 3 months vs 6 months GDS3077 aging:119	4.97384	8.0072e-07	Pdha1;Idh2;Hbb;Hba1;Eef2;Hnrnpab;Gnai2;Cs;Atp5b;Gpc1;Gnb2;Gnas;Flot1;Dynlrb1;Hspa1a;Sh3gl1;Ywhah
Aging_Perturbations_from_GEO_down	Rat femur 32 weeks vs 58 weeks GDS509 aging:273	5.83863	1.41374e-06	Rpl5;Cyb5a;Ndufa5;Mdh1;Rps6;Atp5a1;Hbb;Hba1;Atp5b;Rps29;Atp5e;Rpl35;Pfkm;Gstm5
Aging_Perturbations_from_GEO_down	Rat liver 12 months vs 24 months GSE11097 aging:195	4.13883	2.19187e-06	Cyb5a;Aldh1l1;Gsn;Rpl32;Hspa5;Rps8;Gstt3;Glud1;Rpl18a;Rps29;Gsta3;Fabp7;Psmc2;Rpl35;Flna;Blvrb;Hprt1;Apoe;Ptma
Aging_Perturbations_from_GEO_down	Rat liver 4 months vs 24 months GSE11097 aging:191	4.11416	4.36641e-06	Aldh1l1;Ahcy;Hibadh;A1i3;Got1;Hspa5;Cd81;Ndufa4;Bckdhb;Gstt3;Hbb;Pebp1;Hba1;Qdpr;Aldh2;Ivd;Prodh;Aldh7a1
Aging_Perturbations_from_GEO_down	Rat femur 10 weeks vs 56 weeks GDS509 aging:266	4.24437	1.02183e-05	Mdh1;Ndufa5;Rps8;Idh2;Hbb;Atp5h;Hba1;Hspd1;Tf;Hnrnpk;Ppp1r1a;Rps29;Flot2;Ptma;Pfkm;Ywhah
Aging_Perturbations_from_GEO_down	Rat diaphysealfemoralcallus 26 weeks vs 52 weeks GDS1995 aging:117	4.79798	2.20418e-05	Mdh1;Ndufa4;Rps6;Atp5a1;Hbb;Rpl8;Atp5b;Rpl18a;Rps29;Atp5e;Lmna;Gnas;Rpl26
Aging_Perturbations_from_GEO_down	Rat femur 26 weeks vs 52 weeks GDS509 aging:269	3.57928	3.99361e-05	Pdia3;Ctbp1;Mdh2;Rps8;Anxa5;Slc3a2;Atp5h;Hspe1;Gnai2;Hspd1;Acan;Basp1;Gnas;Dynlrb1;Sptan1;Sh3gl1;Ywhah
Aging_Perturbations_from_GEO_down	Rat liver 4 months vs 12 months GSE11097 aging:190	3.40294	4.33835e-05	Pdia3;Cyb5a;Hspa5;Rps8;Cisd1;Gstt3;Hba1;Eef2;Hnrnpab;Atp5b;Aldh2;Rps29;Gsta3;Atp5e;Fabp7;Rpl35;Blvrb;Ptma
Aging_Perturbations_from_GEO_down	Rat femur 30 weeks vs 56 weeks GDS509 aging:272	4.75147	5.02246e-05	Ppp1r1a;Ndufa5;Mdh1;Ndufa4;Idh2;Hbb;Akr1b1;Flot2;Atp5h;Apoe;Hba1;Pfkm
Aging_Perturbations_from_GEO_down	Rat liver 6 months vs 18 months GSE11097 aging:197	3.42763	6.46034e-05	Aldh1l1;Sec23a;Mdh1;A1i3;Hspa5;Ahsg;Dbi;Qdpr;Atp5b;Glud1;Scp2;Aldh2;Rps29;Atp5e;Ivd;Fabp7;Pgk1
Aging_Perturbations_from_GEO_down	Rat femur 8 weeks vs 54 weeks GDS509 aging:265	3.75047	0.000121461	Mdh1;Got1;Ctbp1;Rps8;Hbb;Atp5h;Hba1;Hadhb;Prdx2;Atp5b;Hadha;Hnrnpk;Ppp1r1a;Arf5
Aging_Perturbations_from_GEO_down	Rat femur 6 weeks vs 52 weeks GDS509 aging:263	3.63849	0.000163094	Cd81;Rps8;Idh2;Hbb;Hba1;Gnai2;Atp5b;Tf;Rps29;Basp1;Gnas;Atp6v1b2;Apoe;Ywhah
Aging_Perturbations_from_GEO_down	Rat liver 11 months vs 24 months GSE11097 aging:200	3.20484	0.000215438	Aldh1l1;Ahcy;Hibadh;Fech;Cd81;Ndufa4;Bckdhb;Cisd1;Gstt3;Pebp1;Qdpr;Scp2;Aldh2;Atp5e;Fabp7;Prodh
Aging_Perturbations_from_GEO_down	Rat femur 12 weeks vs 58 weeks GDS509 aging:267	4.09564	0.000340629	Prdx2;Tf;Mdh1;Rps29;Ndufa4;Rps6;Atp5a1;Hbb;Hba1;Rpl8;Ywhah
Aging_Perturbations_from_GEO_down	Rat liver 6 months vs 11 months GSE11097 aging:196	2.59674	0.00670443	Atp5b;Glud1;Fga;Sec23a;Scp2;Rpl18a;A1i3;Got1;Aldh2;Rps29;Fabp7;Rps20
Aging_Perturbations_from_GEO_down	Rat liver 6 months vs 24 months GSE11097 aging:198	2.27855	0.0217501	Qdpr;Glud1;Aldh1l1;Ahcy;Scp2;Hibadh;Aldh2;Cd81;Atp5e;Fabp7;Gstt3
Aging_Perturbations_from_GEO_down	Rat hippocampus CA3 region 6 months vs 25 months GSE14724 aging:347	2.12563	0.0415988	Dgkg;Cdv3;Cadm3;Pdpk1;Prep;Ncam1;Hpcal4;Stx1a;Scn2b;Pafah1b1
PPI_Hub_Proteins	YWHAB	12.5266	3.49005e-71	Cntfr;Rpl5;Aldh1l1;Ctnnd2;Arhgap39;Rpl8;Gja1;Ppp2r1a;Dpysl5;Basp1;Chchd6;Palm;Tnr;Vps35;Atp6v1e1;Sbf1;Prkacb;Rgs7;Actn2;Rps8;Actn1;Actn4;Olfm1;Lppr4;Rin1;Atp6v0d1;Stx1a;Gpm6a;Cnp;Ttyh1;Ntm;Itpr1;Lin7a;Cacna1e;Atp5b;Grin2a;Hsph1;Atp6v1d;Sptbn1;Gria3;Prnp;Pdha1;Hspa5;Idh2;Hspa12a;Eef2;Grin2b;Snap91;Syt7;Cs;Glud1;Ehd3;Dlg1;Dlg3;Gnb2;Gnas;Cntn1;Rab5a;Picalm;Cntnap1;Ywhab;Ap2a1;Ap2a2;Hapln1;Grm5;Camkv…
PPI_Hub_Proteins	SLC2A4	10.6103	2.32004e-49	Rpl5;Rnh1;Hibadh;Ywhab;Rpl8;Ap2a2;Rpl18a;Aldh2;Ywhaq;Ppp2r1a;Cfl1;Lonp1;Flot1;Atp6v1e1;Prkacb;Ywhag;Skp1;Ywhah;Pdia3;Rps7;Rps8;Actn1;Acad9;Rps6;Actn4;Tsn;Hadhb;Hadha;Prkar1a;Hnrnph1;Tcp1;Pccb;Atp6v1b2;Cdh13;Hprt1;Rpl26;Pabpc1;Slc25a11;Arf5;Pafah1b1;Camk2b;Stx12;Rtn3;Stoml2;Ahcy;Atp5a1;Ak3;Slc3a2;Atp5h;Pld3;Gnai2;Hspd1;Prdx3;Prdx2;Atp5b;Cand1;Gpc1;Lmna;Rpl13;Mapk1;Ncam1;Atp6v1d;Mapk3;Mdh1;Hspa5;St…
PPI_Hub_Proteins	DLG4	13.5574	1.52054e-47	Arf1;Ywhab;Pebp1;Ap2a1;Dbi;Aldh2;Scrn1;Ppp2r1a;Basp1;Cfl1;Nefl;Tnr;Nefm;Sptan1;Dlgap2;Ywhag;Pdia3;Actn2;Actn1;Anxa5;Lancl1;Actn4;Syn2;Sirt2;Nme1;Cnksr2;Atp6v1b2;Lancl2;Atp6v0d1;Shank1;Otub1;Camk2b;Nlgn3;Gpm6a;Mtpn;Cnp;Atp5a1;Camk2a;Htt;Lin7a;Akap5;Gnai2;Hspd1;Prdx3;Prdx2;Atp5b;Grin2a;Ptprz1;Oxct1;Pgk1;Mapk1;Crym;Sptbn1;Gria3;Mapk3;Snca;Pdha1;Got1;Hspa5;St13;Atp2b4;Hspa12a;Baiap2;Grin2b;Grin1;Cs;F…
PPI_Hub_Proteins	GRIN2B	13.1312	7.62594e-27	Camk2b;Ywhab;Atp5a1;Camk2a;Atp1a3;Lin7a;Akap5;Prdx2;Grin2a;Grm5;Ppp2r1a;Nefl;Rpl13;Mapk1;Nefm;Prkacb;Dlgap2;Sptbn1;Ywhag;Appl1;Ap1m1;Ywhah;Mapk3;Gsn;Actn2;Pdpk1;Atp2b4;Ptpn11;Actn4;Grin2b;Grin1;Dlg1;Gap43;Dlg3;Prkar1a;Gnb2;Gnas;Atp6v0d1;Rab5a;Stx1a;Ran
PPI_Hub_Proteins	GABARAPL1	7.26348	2.10377e-24	Rpl5;Arf1;Rpl3;Ywhab;Rpl8;Aldh2;Ppp2r1a;Cfl1;Sptan1;Pdia3;Gabarapl2;Rps7;Rps8;Actn1;Rps6;Nme1;Hadhb;Hadha;Prkar1a;Hnrnph1;Tcp1;Hprt1;Pabpc1;Sec23a;Ahcy;Atp5a1;Atp5l;Hspd1;Prdx3;Prdx2;Atp5b;Hsph1;S100a16;Lmna;Pgk1;Flna;Rpl13;Hnrnpa1;Sptbn1;Snca;Hnrnpa3;Gsn;Hspa5;Mdh2;Ndufa4;Eef2;Hspe1;Hnrnpab;Tf;Hnrnpk;Hnrnpa2b1;Alb;Hnrnpd;Rps20;Hspa1a
PPI_Hub_Proteins	GRIN1	13.9651	1.56317e-20	Camk2b;Ywhab;Camk2a;Atp1a3;Grin2a;Grm5;Ppp2r1a;Nefl;Mapk1;Prkacb;Sptan1;Sptbn1;Ywhag;Appl1;Mapk3;Actn2;Pdpk1;Atp2b4;Ptpn11;Grin2b;Grin1;Dlg1;Gap43;Dlg3;Prkar1a;Grb2;Rab5a;Stx1a;Ran;Hspa1a
PPI_Hub_Proteins	GABARAPL2	6.04001	1.15405e-19	Rpl5;Rpl3;Hbb;Pebp1;Rpl8;Pcmt1;Ppp2r1a;Vps35;Sptan1;Pdia3;Gabarapl2;Atp6v1g2;Rps7;Rps8;Rps6;Lancl1;Hadhb;Hadha;Prkar1a;Hnrnph1;Tcp1;Hprt1;Pabpc1;Mtpn;Sec23a;Atp5a1;Lin7a;Gspt1;Hspd1;Prdx3;Prdx2;Atp5b;Hsph1;Rpl13;Hnrnpa1;Srsf10;Sptbn1;Hnrnpa3;Hspa5;St13;Mdh2;Eef2;Hspe1;Hnrnpab;Hnrnpk;Hnrnpa2b1;Alb;Hnrnpd;Hyou1;Rps20;Hspa1a
PPI_Hub_Proteins	PRKCE	11.0492	2.36396e-19	Ywhab;Atp5a1;Akr1b1;Akap5;Gnai2;Hspd1;Atp5b;Gja1;Grm5;Lmna;Mapk1;Prkacb;Snca;Mapk3;Hspa5;Actn2;Pdpk1;Ndufa4;Gad1;Grin2b;Hnrnpab;Grin1;Hadhb;Tiam1;Hadha;Hnrnpk;Prkar1a;Hnrnph1;Hnrnpa2b1;Hnrnpd;Slc25a11;Hspa1a
PPI_Hub_Proteins	MAP1LC3A	6.98322	1.59333e-18	Rpl5;Sec23a;Rpl3;Ahcy;Atp5a1;Ap2a1;Rpl8;Prdx3;Pcmt1;Prdx2;Atp5b;Hsph1;Rpl18a;Mthfd1l;Cfl1;Rpl13;Hnrnpa1;Sptan1;Srsf10;Sptbn1;Snca;Gabarapl2;Hnrnpa3;Hspa5;Mdh2;Rps8;Ndufa4;Eef2;Hnrnpab;Nme1;Hadhb;Hadha;Hnrnpk;Hnrnph1;Tcp1;Hnrnpa2b1;Alb;Hnrnpd;Grb2;Rps20;Pabpc1;Hspa1a
PPI_Hub_Proteins	GABARAP	5.58054	9.74191e-16	Rpl5;Sec23a;Rpl3;Ahcy;Atp5a1;Rpl8;Hspd1;Prdx3;Prdx2;Atp5b;Hsph1;Rpl18a;Ywhaq;Ppp2r1a;Rpl13;Hnrnpa1;Sptan1;Srsf10;Gabarapl2;Hnrnpa3;Rps7;Hspa5;Mdh2;Rps8;Ndufa4;Rps6;Eef2;Hspe1;Hnrnpab;Hadhb;Hadha;Hnrnpk;Prkar1a;Hnrnph1;Tcp1;Hnrnpa2b1;Alb;Hnrnpd;Rps20;Hprt1;Pabpc1;Gla;Hspa1a
PPI_Hub_Proteins	MAP1LC3B	6.79377	2.64675e-15	Sec23a;Ahcy;Atp5a1;Htt;Rpl8;Coro1c;Hspd1;Prdx3;Pcmt1;Prdx2;Atp5b;Hsph1;Ppp2r1a;Hnrnpa1;Sptan1;Sptbn1;Snca;Gabarapl2;Hnrnpa3;Hspa5;Rps8;Eef2;Hnrnpab;Hadhb;Hadha;Hnrnpk;Prkar1a;Hnrnph1;Tcp1;Hnrnpa2b1;Alb;Dnaja2;Hnrnpd;Rps20;Hspa1a
PPI_Hub_Proteins	SNCA	6.65259	4.33042e-15	Camk2b;Cntfr;Brsk1;Ndufa11;Cnp;Ndufa12;Ywhab;Ntm;Camk2a;Ap2a1;Slc3a2;Atp5h;Uchl1;Nefl;Mapk1;Sptan1;Sptbn1;Ywhag;Ywhah;Snca;Opcml;Mapk3;Rps7;Hspa5;Ndufa5;Ap2b1;Sept4;Gnb2;Hnrnpa2b1;Cntn1;Atp6v1b2;Atp6v0d1;Slc25a11;Stx1a;Hspa1a
PPI_Hub_Proteins	IKBKE	5.42532	1.95838e-14	Mtpn;Rpl3;Gmfb;Rpl32;Cul1;Twf1;Akr1b1;Etfb;Gspt1;Pcmt1;Uchl1;Rpl18a;Ppp2r1a;Sptan1;Sptbn1;Skp1;St13;Cnpy2;Hspe1;Tpd52l2;Tsn;Ktn1;Aimp1;Hadha;Hnrnph1;Gnb2;Cops2;Eif3i;Psmc2;Hyou1;Grb2;Pfdn2;Hprt1;Pabpc1;Mapre1;Calm2;Rab5a;Pfdn5;Hspa1a;Otub1
PPI_Hub_Proteins	GRB2	3.97006	6.94885e-13	Hist2h2aa3;Cntfr;Cntnap1;Rpl3;Gmfb;Celf2;Eif4a3;Ap2a1;Pcmt1;Rpl18a;Cfl1;Sptan1;Dlgap2;Ahsg;Rps8;Actn1;Actn4;Hadhb;Prkar1a;Hnrnph1;Kit;Rpl26;Pabpc1;Atp5a1;Htt;Coro1c;Hspd1;Lmna;Ap2s1;Flna;Rpl13;Mapk1;Hnrnpa1;Srsf10;Sptbn1;Gstm3;Prnp;Gsn;Hspa5;Gad1;Ptpn11;Ap2b1;Eef2;Grin1;Tf;Hnrnpk;Hnrnpa2b1;Dnaja2;Grb2;Rps20
PPI_Hub_Proteins	MAP3K3	7.38431	7.97314e-13	Ywhab;Atp5a1;Gnai2;Coro1c;Bag5;Ywhaq;Ppp2r1a;Lonp1;Flna;Sptan1;Sptbn1;Ywhag;Ywhah;Nudc;Hspa5;St13;Actn4;Dlg1;Hnrnph1;Gnb2;Tcp1;Pfdn2;Sugt1;Calm2;Pfdn5;Pfdn6;Hspa1a
PPI_Hub_Proteins	IL7R	10.0744	8.2341e-12	Pdia3;Mtpn;Gsn;Hspa5;Ywhab;Pebp1;Sri;Hspd1;Prdx3;Prdx2;Atp5b;Tf;Sh3bgrl;Cfl1;Alb;Mapk1;Grb2;Mapre1;Mapk3;Hspa1a
PPI_Hub_Proteins	ARRB2	5.62122	1.872e-11	Rpl3;Ywhab;Ap2a1;Ap2a2;Ywhaq;Ppp2r1a;Cfl1;Rpl35;Flna;Mapk1;Vps35;Hnrnpa1;Sptan1;Sptbn1;Ywhag;Ywhah;Mapk3;Gsn;Rps7;Hspa5;Rps8;Rps6;Ap2b1;Eef2;Hnrnpk;Hnrnph1;Hnrnpd;Rpl26;Pabpc1;Hspa1a
PPI_Hub_Proteins	ARRB1	6.24629	2.37764e-11	Dgkg;Rtn3;Rpl3;Ywhab;Atp5a1;Ap2a1;Atp5b;Ywhaq;Cfl1;Ap2s1;Flna;Mapk1;Hnrnpa1;Sptan1;Ywhag;Ywhah;Mapk3;Hnrnpa3;Gsn;Hspa5;Rps8;Ap2b1;Ktn1;Hnrnpk;Hnrnph1;Eif3i;Hspa1a
PPI_Hub_Proteins	EPB41	7.93141	3.53963e-11	Mtpn;Ywhab;Pebp1;Ptpn11;Hspe1;Tsn;Atp5l;Rab11b;Fkbp1a;Pcmt1;Hadha;Dlg1;Scp2;Ywhaq;Nefl;Hprt1;Dynlrb1;Atp6v1e1;Mapre1;Sptan1;Sptbn1;Ywhag
PPI_Hub_Proteins	CALM1	5.19413	4.49599e-11	Camk2b;Rtn3;Cnp;Camk2a;Itpr1;Akap5;Grm5;Camkv;Mthfd1l;Basp1;Lonp1;Sbf1;Sptan1;Sh3gl1;Snca;Vat1;Nudc;Ap2b1;Hook3;Hspa12a;Sept4;Grin2b;Syn2;Tpd52l2;Sirt2;Grin1;Pcp4;Gap43;Dlg3;Rps20;Acsbg1
PPI_Hub_Proteins	YWHAZ	4.29505	1.46577e-10	Rpl5;Ahcy;Ywhab;Eif4a3;Atp5a1;Hspd1;Atp5b;Hsph1;Cand1;Ywhaq;Lmna;Cfl1;Pgk1;Flna;Hnrnpa1;Prkacb;Sptan1;Sptbn1;Ywhag;Ywhah;Snca;Gabarapl2;Rps7;Hspa5;Mink1;Lancl1;Actn4;Eef2;Grin2b;Syn2;Hnrnpk;Tcp1;Rin1;Tln1;Ran;Hspa1a
PPI_Hub_Proteins	ACTB	5.11681	2.58571e-10	Ywhab;Atp5a1;Ppp1r9a;Gnai2;Hspd1;Tmsb4x;Lmna;Cfl1;Flna;Hnrnpa1;Sptan1;Snca;Gabarapl2;Gsn;Rps7;Actn2;Rps8;Actn1;Actn4;Grin2b;Hnrnpab;Grin1;Hnrnpk;Hnrnph1;Eif3i;Hnrnpa2b1;Hnrnpd;Tln1;Ran
PPI_Hub_Proteins	HSP90AB1	8.57654	2.58571e-10	Rpl5;Gabarapl2;Mdh1;Ywhab;Actn1;Rps6;Eef2;Gnai2;Hsph1;Tcp1;Pgk1;Flna;Grb2;Hnrnpa1;Prkacb;Sptan1;Skp1;Snca;Hspa1a
PPI_Hub_Proteins	CAMK2A	7.68666	4.40634e-10	Camk2b;Actn2;Ywhab;Actn1;Camk2a;Actn4;Grin2b;Grin1;Qdpr;Tiam1;Grin2a;Dlg1;Grm5;Dlg3;Ywhaq;Abi1;Nefl;Flna;Calm2;Snca
PPI_Hub_Proteins	EGFR	4.17963	1.54237e-09	Camk2a;Htt;Slc3a2;Gnai2;Hspd1;Atp5b;Uchl1;Sh3bgrl;Alcam;Ywhaq;Cfl1;Mapk1;Ncam1;Snx6;Appl1;Mapk3;Gabarapl2;Dusp3;Mdh1;Got1;Hspa5;Ptpn11;Olfm1;Hnrnpk;Prkar1a;Hnrnph1;Dnaja2;Grb2;Pabpc1;Rin1;Tln1;Calm2;Hspa1a
PPI_Hub_Proteins	MAP3K1	6.5537	5.15774e-09	Rpl3;Hspa5;Rps8;Actn2;Rps6;Hadhb;Glud1;Hadha;Hsph1;Bag5;Tcp1;Rpl35;Rac3;Rpl13;Flna;Mapk1;Grb2;Calm2;Mapk3;Hspa1a
PPI_Hub_Proteins	PRKCB	4.72161	5.15774e-09	Gsk3a;Ywhab;Ctnnd2;Camk2a;Pebp1;Ap2a1;Add3;Gja1;Grm5;Ppp2r1a;Lmna;Flna;Ncam1;Dlgap2;Sptan1;Sptbn1;Ywhag;Fga;Marcksl1;Pdpk1;Actn1;Ptpn11;Grin2b;Grin1;Tiam1;Gap43;Kit
PPI_Hub_Proteins	PRKCA	3.7639	5.29175e-09	Gpm6a;Gsk3a;Gmfb;Ywhab;Pebp1;Aqp4;Akap5;Add3;Gja1;Grin2a;Grm5;Ppp2r1a;Lmna;Palm;Flna;Mapk1;Ywhag;Rgs7;Ywhah;Mapk3;Pdpk1;Aplp2;Rps6;Ptpn11;Eef2;Grin2b;Tiam1;Tf;Gap43;Ppp1r1a;Dlg3;Hnrnph1;Kit;Plaa;Hspa1a
PPI_Hub_Proteins	MAP3K14	6.93295	5.29175e-09	Rpl5;Rpl3;Rpl32;Rps7;Hspa5;Rps8;Rps6;Atp5a1;Pebp1;Rpl8;Glud1;Rpl35;Rpl13;Rps20;Pabpc1;Hnrnpa1;Calm2;Mapk3;Hspa1a
PPI_Hub_Proteins	TRAF6	3.74139	5.86298e-09	Mtpn;Gmfb;Ahcy;Cnp;Cd81;Prep;Cul1;Akr1b1;Ap2a1;Gspt1;Pcmt1;Uchl1;Rpl18a;Ppp2r1a;Rpl35;Vps35;Atp6v1e1;Gstm3;Cyb5a;Hspa5;St13;Hspe1;Tsn;Cs;Glud1;Hadha;Tollip;Csde1;Gnb2;Eif3i;Psmc2;Hyou1;Hprt1;Pabpc1;Mapre1
PPI_Hub_Proteins	PRKACB	6.57242	1.10856e-08	Fga;Ywhab;Pdpk1;Itpr1;Grin2b;Grin1;Qdpr;Cnksr2;Tiam1;Hnrnpk;Ppp1r1a;Prkar1a;Kit;Nefl;Flna;Mapk1;Dlgap2;Sptbn1;Mapk3
PPI_Hub_Proteins	MAPK13	7.44289	1.42638e-08	Pdia3;Nudc;Dusp3;Ahcy;Hspa5;Ywhab;Mdh2;Atp5a1;Eef2;Cacna1e;Hnrnpk;Pgk1;Nefl;Nefm;Pabpc1;Hnrnpa1;Ran
PPI_Hub_Proteins	231403	4.91468	1.74698e-08	Mtpn;Usp14;Nudc;Sec23a;Rpl3;Dusp3;Ahcy;Rpl32;Got1;Cd81;Prep;Akr1b1;Hspe1;Gspt1;Tsn;Atp5l;Cs;Pcmt1;Hadha;Mapk1;Vps35;Hprt1;Pabpc1;Mapre1
PPI_Hub_Proteins	PIK3CA	7.82433	2.09624e-08	Gsn;Ywhab;Pdpk1;Aplp2;Atpif1;Ptpn11;Grin2b;Gnai2;Grin1;Gnb2;Kit;Rac3;Rps20;Grb2;Ywhah;Appl1
PPI_Hub_Proteins	MCC	4.84032	2.16907e-08	Stoml2;Dusp3;Ahcy;Cul1;Akr1b1;Gspt1;Tsn;Aimp1;Cs;Pcmt1;Uchl1;Ppp2r1a;Csde1;Eif3i;Ap2s1;Vps35;Hyou1;Grb2;Pfdn2;Hprt1;Atp6v1e1;Mapre1;Pfkm;Otub1
PPI_Hub_Proteins	ESR1	3.45806	3.21533e-08	Rpl5;Rpl3;Rpl8;Hspd1;Atp5b;Rpl18a;Ywhaq;Flna;Rpl13;Mapk1;Hnrnpa1;Sptan1;Sptbn1;Ywhah;Mapk3;Hnrnpa3;Gsn;Hspa5;Rps8;Actn1;Rps6;Hnrnpab;Tf;Hnrnpk;Gnb2;Caprin1;Eif3i;Hnrnpa2b1;Hnrnpd;Grb2;Rps20;Pabpc1;Calm2;Ptma;Hspa1a
PPI_Hub_Proteins	EIF1B	6.38804	9.78629e-08	Nudc;Rpl3;Ahcy;Rpl32;Tsn;Pcmt1;Uchl1;Rpl18a;Ppp2r1a;Rps29;Eif3i;Rpl35;Pfdn2;Rpl26;Hprt1;Mapre1;Otub1
PPI_Hub_Proteins	APP	4.99144	1.12862e-07	Pdia3;Stx12;Prnp;Gsk3a;Gsn;Hspa5;Ywhab;Aplp2;Hadhb;Uchl1;Gpc1;Cntn1;Flot1;Nefl;Hyou1;Grb2;Ncam1;Apoe;Sptan1;Stx1a;Snca
PPI_Hub_Proteins	HNRNPK	5.65714	1.96325e-07	Gabarapl2;Arf1;Rps8;Eif4a3;Atp5a1;Hspd1;Prdx3;Atp5b;Hnrnpk;Aldh2;Hnrnph1;Rpl13;Rps20;Grb2;Hnrnpa1;Prkacb;Skp1;Mapk3
PPI_Hub_Proteins	YWHAE	5.18663	2.86561e-07	Gabarapl2;Stoml2;Hnrnpa3;Rps8;Ywhab;Atp5a1;Grin2b;Syn2;Grin1;Prdx2;Atp5b;Ywhaq;Hnrnpa2b1;Pgk1;Rin1;Prkacb;Ywhag;Ywhah;Snca
PPI_Hub_Proteins	H2AFX	5.84836	2.87312e-07	Vat1;Hspa5;Ywhab;Anxa5;Hnrnpab;Rab11b;Prdx3;Cfl1;Lmna;Hnrnpa2b1;Pgk1;Hnrnpd;Vps35;Hyou1;Pabpc1;Hnrnpa1;Hspa1a
PPI_Hub_Proteins	CLTC	7.00287	5.72176e-07	Gabarapl2;Ywhab;Hip1r;Ap2b1;Grin2b;Ap2a2;Snap91;Grin1;Dnajc6;Kit;Prkacb;Ywhag;Picalm;Snca
PPI_Hub_Proteins	TNIK	6.93707	6.2118e-07	Nudc;Hnrnpa3;Gsn;Got1;Cnpy2;Sept4;Cnksr2;Pcmt1;Uchl1;Ppp2r1a;Mapk1;Nefm;Sptbn1;Otub1
PPI_Hub_Proteins	GC20	5.71211	8.8424e-07	Nudc;Rpl3;Ahcy;Rpl32;Tsn;Pcmt1;Uchl1;Rpl18a;Ppp2r1a;Rps29;Rpl35;Pfdn2;Rpl26;Hprt1;Mapre1;Otub1
PPI_Hub_Proteins	RAF1	5.67373	9.40379e-07	Hspa5;Ywhab;Camk2a;Pebp1;Grin2b;Hspd1;Grin1;Cnksr2;Hnrnpk;Ywhaq;Gnb2;Mapk1;Prkacb;Ywhag;Ywhah;Mapk3
PPI_Hub_Proteins	CALM3	5.45383	1.5032e-06	Camk2b;Actn2;Mink1;Camk2a;Itpr1;Atp2b4;Akap5;Grin1;Grin2a;Dlg1;Grm5;Gap43;Dlg3;Rin1;Sptbn1;Snca
PPI_Hub_Proteins	EIF2C1	5.38424	1.72453e-06	Gabarapl2;Prnp;Rps7;Rps8;Eif4a3;Rps6;Rpl8;Hspd1;Rpl18a;Tcp1;Dnaja2;Rpl35;Rpl13;Rpl26;Pabpc1;Hnrnpa1
PPI_Hub_Proteins	PRKAB1	4.68285	2.14906e-06	Mtpn;Nudc;Rpl3;Pdha1;St13;Cisd1;Prep;Gspt1;Tsn;Hadha;Csde1;Vps35;Grb2;Pfdn2;Hprt1;Pabpc1;Prkacb;Otub1
PPI_Hub_Proteins	EIF2C2	5.64583	2.20671e-06	Gabarapl2;Stoml2;Rpl3;Ndufa4;Rps6;Atp1a3;Htt;Rpl8;Hspd1;Rpl18a;Rpl35;Rps20;Rpl26;Pabpc1;Hnrnpa1
PPI_Hub_Proteins	IRS1	5.60579	2.35005e-06	Ywhab;Pdpk1;Ptpn11;Grin2b;Grin1;Cand1;Ppp2r1a;Gnb2;Flot2;Mapk1;Grb2;Ywhag;Ran;Ywhah;Mapk3
PPI_Hub_Proteins	PRKACA	3.38778	2.63062e-06	Gsk3a;Gmfb;Cnp;Itpr1;Htt;Akap5;Sri;Ppp1r9a;Hspd1;Grin2a;Ppp2r1a;Capn2;Nefl;Flna;Mapk1;Nefm;Ptrf;Sptbn1;Mapk3;Pdpk1;Gad1;Syn2;Grin1;Ppp1r1a;Prkar1a;Hnrnpd
PPI_Hub_Proteins	HSPA8	5.09172	3.09851e-06	Gabarapl2;St13;Ywhab;Gad1;Uchl1;Hsph1;Hnrnpk;Ywhaq;Tcp1;Abi1;Hnrnpd;Grb2;Prkacb;Ywhag;Ywhah;Hspa1a
PPI_Hub_Proteins	PPP1CA	5.06115	3.27242e-06	Camk2b;Ywhab;Camk2a;Cul1;Ppp1r9a;Ppp1r1a;Ppp1r7;Cfl1;Nefl;Mapk1;Calm2;Pfkm;Skp1;Pafah1b1;Snca;Mapk3
PPI_Hub_Proteins	CTNNB1	3.74485	3.78912e-06	Gsk3a;Anp32a;Ywhab;Ctnnd2;Cul1;Lin7a;Ptpn11;Actn4;Grin2b;Ermn;Grin1;Hspd1;Dlg1;Ywhaq;Ptprz1;Lmna;Hnrnpa2b1;Hnrnpa1;Prkacb;Skp1;Appl1;Snca
PPI_Hub_Proteins	VHL	3.83675	4.54162e-06	Mtpn;Nudc;Akr1b1;Pebp1;Hspe1;Gspt1;C3;Fkbp1a;Pcmt1;Uchl1;Rpl18a;Hnrnpa2b1;Rpl35;Flna;Vps35;Hyou1;Pfdn2;Hprt1;Ptma;Pfdn5;Otub1
PPI_Hub_Proteins	CAV1	6.13574	4.82381e-06	Prnp;Ptpn11;Gnai2;Gja1;Scp2;Tollip;Flot1;Flot2;Flna;Mapk1;Ptrf;Pfkm;Mapk3
PPI_Hub_Proteins	YWHAG	3.33893	4.88217e-06	Gsk3a;Rpl3;Ywhab;Eif4a3;Atp5a1;Hspd1;Atp5b;Ywhaq;Cfl1;Nefl;Flna;Srsf10;Sptbn1;Ywhag;Ywhah;Snca;Baiap2;Grin2b;Hnrnpab;Grin1;Tiam1;Hnrnph1;Alb;Pabpc1;Hspa1a
PPI_Hub_Proteins	RPS6KA3	3.50657	5.78519e-06	Gsk3a;Gmfb;Cnp;Ywhab;Pdpk1;Ctnnd2;Rps6;Itpr1;Add3;Grin2b;Grin1;Ppp1r1a;Lmna;Flna;Mapk1;Rin1;Dlgap2;Srsf10;Pfkm;Sptbn1;Ywhah;Shank1;Mapk3
PPI_Hub_Proteins	ITGB1	5.92295	6.57225e-06	Pdia3;Fga;Cd81;Ywhab;Actn1;Camk2a;Slc3a2;Actn4;Nme1;Hspd1;Flna;Tln1;Rab5a
PPI_Hub_Proteins	MAPK8	3.57185	7.05788e-06	Marcksl1;Dusp3;Ctbp1;Ywhab;Pdpk1;Ctnnd2;Aplp2;Eef2;Tpd52l2;Aimp1;Gja1;Hnrnpk;Cops2;Lmna;Rac3;Mapk1;Nefm;Dlgap2;Hspa1a;Ywhah;Snca;Mapk3
PPI_Hub_Proteins	ACTG1	4.20547	7.10272e-06	Camk2b;Gsn;Actn2;Pdpk1;Actn1;Anxa5;Camk2a;Actn4;Ppp1r9a;Hnrnpk;Tmsb4x;Cfl1;Flna;Grb2;Tln1;Pfkm;Sptbn1;Snca
PPI_Hub_Proteins	CDK1	2.76925	7.82205e-06	Usp14;Itpr1;Lmnb2;Gnai2;Coro1c;Gja1;Grin2a;Grm5;Ppp2r1a;Ca2;Lmna;Palm;Pgk1;Efhd2;Flna;Ncam1;Hnrnpa1;Sptbn1;Skp1;Appl1;Pdia3;Aplp2;Eef2;Snap91;Sirt2;Nme1;Dlg1;Hnrnpk;Ppp1r1a;Gnb2;Hnrnpd;Ptma
PPI_Hub_Proteins	DYNLL1	4.7319	1.31137e-05	Mdh1;Mdh2;Hip1r;Cs;Glud1;Grin2a;Dlg3;Ppp2r1a;Ca2;Grb2;Dynlrb1;Pabpc1;Pfkm;Skp1;Snca
PPI_Hub_Proteins	ALB	4.93754	1.73397e-05	Dgkg;Gabarapl2;Fga;Gsn;St13;Ahsg;Hba1;Tiam1;Tf;Alb;Tln2;Apoe;Ywhag;Ap1m1
PPI_Hub_Proteins	SQSTM1	4.90459	1.83375e-05	Camk2b;Gabarapl2;Ndufa5;Camk2a;Htt;Hadhb;Hadha;Grin2a;Mapk1;Nefm;Gria3;Shank1;Snca;Mapk3
PPI_Hub_Proteins	SRRM2	4.87207	1.93864e-05	Prnp;Rps7;Ywhab;Eif4a3;Hspd1;Hnrnph1;Eif3i;Lmna;Hnrnpa2b1;Hnrnpa1;Sptbn1;Ywhag;Mapk3;Hspa1a
PPI_Hub_Proteins	MYC	2.96251	1.99311e-05	Arf1;Gsk3a;Rnh1;Ywhab;Cul1;Ap2a1;Hspd1;Hsph1;Mthfd1l;Ywhaq;Lmna;Lonp1;Ap2s1;Mapk1;Skp1;Mapk3;Ndufa5;Hadhb;Tiam1;Hnrnpk;Eif3i;Tcp1;Psmc2;Dnaja2;Pfdn5;Slc25a11
PPI_Hub_Proteins	ABL1	3.40005	2.14447e-05	Cntfr;Cdv3;Cntnap1;Ahsg;Ywhab;Gad1;Ctnnd2;Ptpn11;C3;Ywhaq;Kit;Abi1;Flna;Grb2;Tln2;Rin1;Dlgap2;Sptan1;Ywhag;Ran;Ywhah
PPI_Hub_Proteins	CSNK2A1	2.81588	2.14447e-05	Rpl5;Gmfb;Anp32a;Ywhab;Aqp4;Slc3a2;C3;Hsph1;Ywhaq;Nefl;Mapk1;Apoe;Hnrnpa1;Sptan1;Dlgap2;Sptbn1;Snca;Prnp;Fga;Marcksl1;Nme1;Dlg1;Gap43;Hnrnpk;Sub1;Hnrnpa2b1;Stx1a;Pafah1b1
PPI_Hub_Proteins	CSNK1E	4.41371	2.58198e-05	Fga;Ywhab;Camk2a;Ap2a1;Eef2;Nme1;Cnksr2;Ywhaq;Palm;Pgk1;Nefl;Nefm;Hnrnpa1;Dlgap2;Ran
PPI_Hub_Proteins	PRKCD	4.6559	2.91592e-05	Gsk3a;Cnp;Ywhab;Pdpk1;Rps6;Pebp1;Lmnb2;Tiam1;Grm5;Gap43;Hnrnpk;Mapk1;Ywhag;Mapk3
PPI_Hub_Proteins	SRC	2.86901	3.15066e-05	Cntnap1;Ywhab;Gja1;Grin2a;Cfl1;Flna;Rpl13;Prkacb;Sptan1;Dlgap2;Ywhag;Sh3gl1;Ywhah;Snca;Gsn;Pdpk1;Actn1;Atp2b4;Ptpn11;Ap2b1;Grin2b;Grin1;Tiam1;Hnrnpk;Kit;Grb2
PPI_Hub_Proteins	COPS5	5.26973	4.00639e-05	Usp14;Uchl1;Stoml2;Hspa5;Basp1;Cops2;Atp5a1;Cul1;Flot1;Mapre1;Ywhag;Hspa1a
PPI_Hub_Proteins	PRKCZ	4.79798	4.35882e-05	Gsk3a;Ywhab;Pdpk1;Pebp1;Tiam1;Grm5;Ywhaq;Ppp2r1a;Mapk1;Hnrnpa1;Ywhag;Ywhah;Mapk3
PPI_Hub_Proteins	PPP2CA	4.35217	5.59755e-05	Ywhab;Aplp2;Gad1;Htt;Eef2;Grin2b;Grin1;Ppp2r1a;Cfl1;Tcp1;Nefl;Mapk1;Ppfia2;Mapk3
PPI_Hub_Proteins	HSPA1A	4.75147	9.97768e-05	Gabarapl2;Brsk1;Ywhaq;St13;Ywhab;Dnaja2;Cacna1e;Ptma;Ywhag;Snca;Grin1;Hspa1a
PPI_Hub_Proteins	PPP2R1A	4.71577	0.000105485	Gabarapl2;Prdx2;Fech;Ppp2r1a;Ywhab;Mapk1;Eef2;Grin2b;Ppfia2;Hspd1;Mapk3;Grin1
PPI_Hub_Proteins	MDM2	4.0403	0.00011585	Rpl5;Gsn;Rps7;Ctbp1;Ndufa12;Baiap2;Nudt9;Ywhaq;Gnas;Rps20;Nefm;Rpl26;Stx1a;Pfdn6
PPI_Hub_Proteins	CDK2	2.4127	0.000188393	Eif4a3;Cul1;Pebp1;Ap2a1;Add3;Cacna1e;Lmnb2;Mthfd1l;Lmna;Palm;Efhd2;Mapk1;Ncam1;Dlgap2;Sptbn1;Mapk3;Nudc;Marcksl1;Eef2;Tpd52l2;Sirt2;Cnksr2;Dlg1;Hnrnpk;Prkar1a;Hnrnph1;Hnrnpd;Pabpc1;Ptma
PPI_Hub_Proteins	SGK1	4.6612	0.000238741	Cs;Gsk3a;Grm5;Rpl3;Pdpk1;Eif3i;Ola1;Htt;Mapk1;Hyou1;Pabpc1
PPI_Hub_Proteins	MAPK3	3.10029	0.000249062	Gmfb;Dusp3;Ptpn11;Grin2b;Grin1;Gja1;Hnrnpk;Ppp1r1a;Ppp2r1a;Lmna;Abi1;Capn2;Mapk1;Prkacb;Rab5a;Pfkm;Snca;Mapk3
PPI_Hub_Proteins	PIK3R1	3.17073	0.00029758	Pdpk1;Pebp1;Ptpn11;Gnai2;Dlg1;Csde1;Kit;Rac3;Rpl13;Flna;Grb2;Tln1;Dlgap2;Scg2;Rab5a;Ywhag;Sh3gl1
PPI_Hub_Proteins	PLCG1	3.46055	0.000302602	Gsn;Camk2a;Ptpn11;Grin2b;Snap91;Grin1;Grin2a;Kit;Rpl13;Flna;Grb2;Ppfia4;Stx1a;Rgs7;Picalm
PPI_Hub_Proteins	CDK5	4.27899	0.000461361	Prdx2;Grin2a;Ppp1r1a;Ctnnd2;Actn1;Nefl;Htt;Nefm;Fsd1;Tln1;Stx1a
PPI_Hub_Proteins	YWHAH	3.82369	0.000617341	Tiam1;Ywhaq;Ywhab;Pdpk1;Cfl1;Hnrnpd;Rin1;Baiap2;Grin2b;Ywhag;Ywhah;Snca
PPI_Hub_Proteins	MAPK14	2.42382	0.000657869	Gmfb;Dusp3;Ywhab;Mink1;Ppp1r9a;Snap91;Aimp1;Gja1;Gap43;Ppp1r1a;Tollip;Palm;Hnrnpd;Nefl;Flna;Plaa;Mapk1;Grb2;Nefm;Ncam1;Tln2;Hnrnpa1;Sptbn1;Mapk3
PPI_Hub_Proteins	AKT1	2.82925	0.000677415	Gsk3a;Ahsg;Pdpk1;Ctnnd2;Aplp2;Rps6;Htt;Ktn1;Ppp1r1a;Ppp2r1a;Lmna;Flna;Them4;Hnrnpa1;Dlgap2;Srsf10;Appl1;Mapk3
PPI_Hub_Proteins	HNRNPA1	4.36783	0.000754131	Gabarapl2;Hnrnpk;Hnrnph1;Eif4a3;Hnrnpa2b1;Capn2;Grb2;Pabpc1;Hnrnpa1;Hnrnpab
PPI_Hub_Proteins	IGF1R	3.3863	0.000987574	Ywhab;Pdpk1;Ptpn11;Baiap2;Gnai2;Hspd1;Gja1;Hnrnph1;Kit;Gnas;Grb2;Mapre1;Ywhag
PPI_Hub_Proteins	FYN	2.56913	0.00100238	Cntfr;Cntnap1;Ywhab;Gad1;Ctnnd2;Itpr1;Ptpn11;Grin2b;Grin2a;Hnrnpk;Ptprz1;Kit;Cntn1;Flot1;Flna;Flot2;Grb2;Ncam1;Dlgap2;Snca
PPI_Hub_Proteins	SMAD2	2.70657	0.00107183	Hnrnpa3;St13;Camk2a;Sri;Hspd1;Ppp2r1a;Prkar1a;Dnaja2;Gnas;Flna;Mapk1;Nefm;Rin1;Prkacb;Atp6v1d;Ran;Hspa1a;Mapk3
PPI_Hub_Proteins	PTK2	3.7971	0.00110592	Gsn;Actn1;Camk2a;Atp2b4;Mapk1;Grb2;Ptpn11;Tln1;Sh3gl1;Snca;Mapk3
PPI_Hub_Proteins	MAPK1	2.60099	0.00116681	Mtpn;Gmfb;Dusp3;Itpr1;Pebp1;Grin2b;Grin1;Gja1;Ppp2r1a;Abi1;Capn2;Nefl;Plaa;Mapk1;Grb2;Nefm;Prkacb;Mapk3;Snca
PPI_Hub_Proteins	ACTA1	3.7474	0.00120179	Dlg1;Gsn;Rps7;Tmsb4x;Cfl1;Alb;Hip1r;Grb2;Tln2;Tln1;Sptan1
PPI_Hub_Proteins	IKBKB	3.65178	0.0014585	Prdx3;Hspa5;Ppp2r1a;Ywhab;Gsta3;Pebp1;Flna;Ptpn11;Calm2;Hspd1;Hspa1a
PPI_Hub_Proteins	VCL	4.20227	0.00181235	Pdia3;Hadhb;Atp5b;Gsn;Actn2;Actn1;Actn4;Tln2;Tln1
PPI_Hub_Proteins	INSR	3.3163	0.00181235	Arf1;Ahsg;Ywhab;Actn1;Kit;Mapk1;Grb2;Ptpn11;Baiap2;Calm2;Snx6;Mapk3
PPI_Hub_Proteins	NR3C1	3.19731	0.00242516	Anp32a;Ahsg;Alb;Dnaja2;Mapk1;Hba1;Ran;Ktn1;Hspa1a;Ywhah;Hspd1;Mapk3
PPI_Hub_Proteins	BTK	3.95366	0.00266479	Atp5b;Hadha;Gng2;Actn1;Kit;Atp5a1;Twf1;Flna;Grb2
PPI_Hub_Proteins	ARF6	3.41995	0.003944	Aimp1;Cs;Nudc;Rps29;Eif3i;Hyou1;Pfdn2;Slc3a2;Exoc5;Gspt1
PPI_Hub_Proteins	CSNK2A2	2.67591	0.0046167	Prnp;Anp32a;Aplp2;Aqp4;Ppp1r9a;Gap43;Hsph1;Nefl;Nefm;Calm2;Ptma;Stx1a;Snca;Mapk3
PPI_Hub_Proteins	STAT1	3.61708	0.00463192	Dusp3;Kit;Mapk1;Ptpn11;Actn4;Sptan1;Sptbn1;Shank1;Mapk3
PPI_Hub_Proteins	ESR2	2.44213	0.00536387	Gsn;Rpl32;Rps7;Actn1;Rps6;Ap2a1;Gspt1;Prdx3;Rpl18a;Ywhaq;Lonp1;Mapk1;Calm2;Hspa1a;Ywhah;Mapk3
PPI_Hub_Proteins	HSPA5	3.69221	0.00723938	Gabarapl2;Prnp;Dpysl5;Ywhab;Grb2;Gria3;Hspd1;Snca
PPI_Hub_Proteins	APC	3.33301	0.00759189	Sec23a;Hspa5;Dlg3;Ctbp1;Actn1;Flna;Ap2b1;Mapre1;Sptbn1
PPI_Hub_Proteins	MAPK10	3.0392	0.00840897	Grm5;Hsph1;Hnrnpk;Dusp3;Aplp2;Rac3;Grin2b;Sptbn1;Grin1;Hspa1a
PPI_Hub_Proteins	NFKB2	3.00396	0.00901299	Hadhb;Hadha;Hspa5;Ppp2r1a;Rps8;Ctbp1;Hnrnph1;Rpl13;Pabpc1;Skp1
PPI_Hub_Proteins	CDH1	3.50497	0.00941372	Dlg1;Ctnnd2;Actn1;Lmna;Actn4;Stx1a;Hspd1;Hspa1a
PPI_Hub_Proteins	DNM1	3.44668	0.0102253	Prnp;Ywhab;Abi1;Grb2;Grin2b;Ap2a2;Sh3gl1;Grin1
PPI_Hub_Proteins	YWHAQ	2.93585	0.0102253	Ywhaq;Ywhab;Pdpk1;Eif4a3;Camk2a;Srsf10;Ywhag;Rgs7;Ywhah;Hspa1a
PPI_Hub_Proteins	UBC	2.02911	0.0115772	Brsk1;Hibadh;Cd81;Ywhab;Cul1;Htt;Ap2a1;Grin2b;Uchl1;Dlg1;Hnrnpk;Tollip;Kit;Hnrnpd;Mapk1;Grb2;Apoe;Sptbn1;Ywhag;Snca
PPI_Hub_Proteins	SHC1	2.82374	0.012932	Brsk1;Cd81;Dnaja2;Mapk1;Grb2;Ap2a1;Ptpn11;Ap2b1;Ap2a2;Mapk3
PPI_Hub_Proteins	SMAD3	2.33883	0.012932	Rpl3;Ahsg;Cul1;Ppp2r1a;Tcp1;Lmna;Dnaja2;Flna;Mapk1;Grb2;Pabpc1;Prkacb;Sptbn1;Hspa1a
PPI_Hub_Proteins	FLNA	3.28283	0.012932	Camk2b;Grm5;Camk2a;Lmna;Flna;Grb2;Prkacb;Ywhag
PPI_Hub_Proteins	MEPCE	3.01021	0.0130512	Hnrnpk;Cand1;Anp32a;Hspa5;Hnrnph1;Hnrnpa2b1;Hnrnpd;Hnrnpa1;Hnrnpab
PPI_Hub_Proteins	PRKDC	2.40699	0.0135476	Gabarapl2;Marcksl1;Ywhab;Actn1;Rps6;Itpr1;Aqp4;Gap43;Lmna;Grb2;Sptan1;Sptbn1;Ywhag
PPI_Hub_Proteins	HSP90AA1	2.61429	0.0142342	Gabarapl2;Uchl1;Nudc;Ppp2r1a;St13;Pdpk1;Rps6;Mapk1;Sugt1;Hspa1a;Mapk3
PPI_Hub_Proteins	NEDD4	3.13377	0.0161906	Gabarapl2;Hnrnpk;Rpl18a;Ywhab;Gnas;Mapk1;Ap2a1;Mapk3
PPI_Hub_Proteins	CBL	2.74404	0.0219725	Cntfr;Ywhaq;Ywhab;Kit;Flot1;Grb2;Ptpn11;Tln1;Ywhag
PPI_Hub_Proteins	CRK	2.54563	0.0236343	Cntfr;Cntnap1;Kit;Flna;Abat;Grb2;Ap2a1;Ptpn11;Dlgap2;Rgs7
PPI_Hub_Proteins	PRKG1	3.19364	0.0236359	Fga;Pdpk1;Kit;Itpr1;Dlgap2;Syn2;Sptbn1
PPI_Hub_Proteins	EEF1A1	2.6654	0.0254061	Gabarapl2;Hnrnpk;Ywhab;Tmsb4x;Grb2;Hspe1;Rad23b;Ywhag;Snca
PPI_Hub_Proteins	XPO1	3.11127	0.0264192	Nudc;Hnrnpk;Cand1;Anp32a;Eif4a3;Tln1;Ran
PPI_Hub_Proteins	TUBB	3.08475	0.0273197	Gabarapl2;Gja1;Ywhab;Htt;Grb2;Ywhag;Sirt2
PPI_Hub_Proteins	HDAC4	3.03302	0.0294125	Ywhaq;Ctbp1;Ywhab;Mapk1;Ywhag;Ywhah;Mapk3
PPI_Hub_Proteins	NFKBIA	2.86482	0.0383249	Hspa5;Cops2;Capn2;Cul1;Hnrnpa1;Skp1;Ywhah
PPI_Hub_Proteins	GSK3B	1.71764	0.0390305	Marcksl1;Ctnnd2;Add3;Grin2b;Cacna1e;Tpd52l2;Grin1;Gja1;Grm5;Ppp1r1a;Lmna;Palm;Hnrnpd;Flna;Mapk1;Nefm;Ncam1;Prkacb;Dlgap2;Sptbn1;Appl1;Mapk3
PPI_Hub_Proteins	PTPN11	2.60134	0.0404287	Kit;Grb2;Ptpn11;Actn4;Grin2b;Pfkm;Mapk3;Grin1
PPI_Hub_Proteins	TP53	1.83737	0.0432369	Rpl5;Gsk3a;Rps7;Hspa5;Ctbp1;Htt;Eef2;S100b;Uchl1;Ppp2r1a;Tmsb4x;Cops2;Mapk1;Prkacb;Ywhag;Hspa1a;Mapk3
PPI_Hub_Proteins	RHOA	2.7556	0.0445844	Cntnap1;Aplp2;Itpr1;Rac3;Flna;Ktn1;Hspa1a
PPI_Hub_Proteins	FOS	2.52186	0.0459518	Ywhab;Lmna;Mapk1;Nefm;Tln2;Rgs7;Mapk3;Hspa1a
PPI_Hub_Proteins	PTPN6	2.52186	0.0459518	Cntfr;Actn1;Kit;Grb2;Ap2a1;Ptpn11;Actn4;Hba1
PPI_Hub_Proteins	NCK1	2.22682	0.0480484	Cntfr;Cntnap1;Hspa5;Csde1;Gad1;Mink1;Abi1;Rac3;Rpl13;Dlgap2
PPI_Hub_Proteins	PAK1	2.47645	0.0496273	Ctbp1;Pdpk1;Rac3;Flna;Mapk1;Grb2;Baiap2;Ywhag

## Sheet: sheet_6
pathway	description	enrichment_ratio	fdr	features
MSigDB_Hallmark_2020	Complement	4.68741	0.000568714	Dgkg;Gng2;Csrp1;Hspa5;Actn2;Ca2;Gnb2;Prep;Cdh13;Ctsb;Gnai2;Hspa1a
MSigDB_Hallmark_2020	Glycolysis	4.68741	0.000568714	Cyb5a;Vcan;Dpysl4;Got1;Hspa5;Gpc1;Pgk1;Ak3;Ak4;Aldh7a1;Pfkp;Lhpp
MSigDB_Hallmark_2020	Adipogenesis	4.25783	0.00107992	Cs;Acly;Slc27a1;Scp2;Acadl;Ndufa5;Cat;Apoe;Coq9;Etfb;Cox6a1
MSigDB_Hallmark_2020	Estrogen Response Late	4.25783	0.00107992	Tiam1;Olfm1;Ca2;Idh2;Sord;Atp2b4;Cpe;Blvrb;Etfb;Add3;Gla
MSigDB_Hallmark_2020	Myc Targets V1	4.25783	0.00107992	Hnrnpa3;Hnrnpa2b1;Rps6;Hnrnpd;Rps3;Cul1;Pgk1;Pabpc1;Hnrnpa1;Rad23b;Hspd1
MSigDB_Hallmark_2020	Apical Junction	3.83582	0.00334064	Gamt;Nlgn3;Cadm3;Vcan;Actn2;Actn1;Epb41l2;Cntn1;Sirpa;Gnai2
MSigDB_Hallmark_2020	Oxidative Phosphorylation	3.83582	0.00334064	Cs;Hadhb;Glud1;Hadha;Cyb5a;Ndufa5;Idh2;Etfb;Cox6a1;Slc25a5
MSigDB_Hallmark_2020	Hedgehog Signaling	8.98266	0.00871829	Cntfr;Nrcam;L1cam;Scg2
MSigDB_Hallmark_2020	Myogenesis	3.42122	0.00917556	Gabarapl2;Prnp;Actn2;Ak1;Cdh13;Ncam1;Sptan1;Pfkm;Sirt2
MSigDB_Hallmark_2020	mTORC1 Signaling	3.42122	0.00917556	Acly;Hspa5;Got1;Pgk1;Sord;Ak4;Add3;Gla;Hspd1
MSigDB_Hallmark_2020	Coagulation	3.86291	0.0127553	Tf;Csrp1;Gnb2;Prep;Capn2;Sirt2;Ctsb
MSigDB_Hallmark_2020	Pperoxisome	4.41717	0.0127553	Scp2;Ctbp1;Idh2;Alb;Cat;Pabpc1
MSigDB_Hallmark_2020	UV Response Dn	3.6926	0.0143657	Gja1;Celf2;Bckdhb;Kit;Atp2b4;Prkca;Add3
MSigDB_Hallmark_2020	heme Metabolism	3.01389	0.0231136	Hebp1;Aldh1l1;Fech;Ca2;Cat;Hbb;Blvrb;Ctsb
Aging_Perturbations_from_GEO_up	Rat hippocampus CA1 18 months vs 28 months GSE21681 aging:354	8.19268	6.03079e-16	Slc27a1;Cpne7;Ptprn;Pebp1;Rasal1;Park7;Cox6a1;Uchl1;Gng3;Alcam;Camkv;Csrp1;Ppp2r1a;Basp1;Atp5e;Rpl35;Apoe;Ctsb;Marcksl1;Got1;Hba1;L1cam;Sept4;Sirt2;Dnm1;Rab11b;Gfap;Tf;Rps29;Ivd;Gnb2;Nptxr;Gstm5
Aging_Perturbations_from_GEO_up	Rat thoracicaorta 3 months vs 6 months GDS3077 aging:119	7.08387	1.82769e-14	Rpl5;Hibadh;Atp5a1;Dbi;Atp5h;Cox6a1;Hspd1;Cdc42;Hsph1;Csrp1;Acadl;Atp5e;Rps3;Pgk1;Rpl35;Prnp;Cyb5a;Ndufa5;Rps8;Rps6;Rps3a;S100b;Eef1g;Acly;Rps29;Hnrnpa2b1;Alb;Cat;Cpe;Rpl26;Slc25a5;Aldh7a1;Gstm5
Aging_Perturbations_from_GEO_up	Rat femur 12 weeks vs 32 weeks GDS509 aging:261	7.21939	4.48854e-14	Rpl5;Rpl3;Pebp1;Park7;Cox6a1;Acan;Csrp1;Ppp2r1a;Atp5e;Gpc1;Rps3;Rpl35;Apoe;Ctsb;Pdia3;Hnrnpa3;Ndufa5;Actn2;Idh2;Eef2;Dnm1;Fkbp1a;Eef1g;Hadha;Ivd;Gnb2;Gnas;Atp6v1b2;Cpe;Slc25a5;Pfkm
Aging_Perturbations_from_GEO_up	Rat hippocampus dentate gyrus 18 months vs 28 months GSE21681 aging:357	7.06993	6.49537e-14	Hibadh;Ndufa12;Ptprn;Hbb;Aqp4;Park7;Hspd1;Uchl1;Gng3;Csrp1;Ppp2r1a;Atp5e;Rpl35;Ctsb;Pdia3;Dusp3;Got1;Hba1;L1cam;Sept4;Sirt2;Rab11b;Gfap;Tf;Rps29;Gnb2;Gnb1;Cdh13;Rpl26;Dynlrb1;Gstm5
Aging_Perturbations_from_GEO_up	Rat hippocampus dentate gyrus 18 months vs 28 months GSE21681 aging:358	7.59139	7.81903e-14	Ndufa12;Ptprn;Pebp1;Aqp4;Cox6a1;Uchl1;Ppp2r1a;Basp1;Atp5e;Rpl35;Apoe;Ctsb;Pdia3;Dusp3;Got1;Hba1;L1cam;Eef2;Sept4;S100b;Sirt2;Dnm1;Rab11b;Gfap;Tf;Rps29;Gnb2;Gnb1;Rpl26
Aging_Perturbations_from_GEO_up	Rat liver 6 months vs 11 months GSE11097 aging:196	7.1294	2.74095e-13	Rpl5;Aldh1l1;Ahcy;Hibadh;Fech;Ndufa12;Gstt3;Hbb;Pebp1;Etfb;Hspd1;Hebp1;Sh3bgrl;Alcam;Hsph1;Apoe;Prodh;Rps8;Rps6;Idh2;Bckdhb;Sord;Hba1;Acly;Alb;Cat;Pabpc1;Aldh7a1;Calm2
Aging_Perturbations_from_GEO_up	Rat frontalcortex 4 months vs 22 months GDS3939 aging:99	8.13492	3.15697e-13	Rpl5;Rpl3;Hbb;Csrp1;Rps3;Rpl35;Apoe;Crym;Ctsb;Prnp;Dusp3;Rps8;Rps6;Rps3a;Hba1;Sept4;S100b;Ermn;Gfap;Tf;Rps29;Etl4;Gnas;Rpl26;Calm2;Pfdn5
Aging_Perturbations_from_GEO_up	Rat femur 6 weeks vs 26 weeks GDS509 aging:257	6.80203	6.8514e-13	Rpl3;Ahcy;Ctbp1;Pebp1;Dbi;Atp5h;Park7;Cox6a1;Hspd1;Cdc42;Acadl;Ppp2r1a;Gpc1;Rps3;Rpl35;Flot2;Pdia3;Hspa5;Ndufa5;Fkbp1a;Acly;Vcan;Dnaja2;Hyou1;Rpl26;Dynlrb1;Slc25a5;Aldh7a1;Calm2
Aging_Perturbations_from_GEO_up	Rat hippocampus CA3 18 months vs 28 months GSE21681 aging:356	6.48394	1.78522e-12	Hibadh;Cpne7;Ptprn;Wipf3;Pebp1;Rasal1;Park7;Cox6a1;Uchl1;Gng3;Camkv;Ppp2r1a;Basp1;Atp5e;Rpl35;Apoe;Sptan1;Ctsb;Got1;Hba1;L1cam;Sirt2;Dnm1;Rab11b;Gfap;Rps29;Gnb2;Rpl26;Scg2
Aging_Perturbations_from_GEO_up	Rat thoracicaorta 6 months vs 15 months GDS3077 aging:122	7.37774	1.84677e-12	Ahcy;Hbb;Ak3;Dbi;Gnai2;Uchl1;Csrp1;Rps3;Capn2;Flot1;Rpl35;Flot2;Sptan1;Ctsb;Mapk3;Rps8;Idh2;Rps3a;Hba1;S100b;Cs;Gnb2;Alb;Cpe;Rpl26;Dynlrb1
Aging_Perturbations_from_GEO_up	Rat hippocampus CA1 18 months vs 28 months GSE21681 aging:353	6.89405	2.68531e-12	Hibadh;Pebp1;Aqp4;Park7;Cox6a1;Uchl1;Gng3;Csrp1;Ppp2r1a;Basp1;Atp5e;Rpl35;Apoe;Sptan1;Ctsb;Pdia3;Got1;Hba1;L1cam;Sept4;Sirt2;Dnm1;Rab11b;Gfap;Tf;Rps29;Rpl26
Aging_Perturbations_from_GEO_up	Rat hippocampus CA3 18 months vs 28 months GSE21681 aging:355	6.69208	4.81991e-12	Cpne7;Ptprn;Wipf3;Aqp4;Park7;Cox6a1;Uchl1;Gng3;Alcam;Camkv;Ppp2r1a;Atp5e;Flot1;Rpl35;Apoe;Sptan1;Ctsb;Pdia3;Got1;Hba1;Sirt2;Dnm1;Rab11b;Gfap;Rps29;Gnb2;Scg2
Aging_Perturbations_from_GEO_up	Rat femur 6 weeks vs 52 weeks GDS509 aging:263	6.11015	1.25373e-11	Rpl5;Dbi;Atp5h;Park7;Hspd1;Cdc42;Gja1;Acadl;Ppp2r1a;Gpc1;Pgk1;Rpl35;Ctsb;Mapk3;Pdia3;Gabarapl2;Hnrnpa3;Hspa5;Ndufa5;Rps6;Eef2;Fkbp1a;Eef1g;Dnaja2;Hyou1;Rpl26;Aldh7a1;Calm2
Aging_Perturbations_from_GEO_up	Rat liver 6 months vs 24 months GSE11097 aging:198	6.43962	2.39563e-11	Rpl5;Rpl3;Ndufa12;Hbb;Pebp1;Dbi;Hspd1;Hebp1;Sh3bgrl;Alcam;Rps3;Sptan1;Ctsb;Hspa5;Rps8;Rps6;Rps3a;Hba1;Eef2;Acly;Tf;Alb;Rpl26;Pabpc1;Slc25a5;Calm2
Aging_Perturbations_from_GEO_up	Rat hippocampus 7 months vs 21 months GDS4019 aging:98	7.01809	2.6825e-11	Prnp;Slc27a1;Ndrg4;Cntnap1;Dusp3;Ndufa11;Cpne7;Hbb;Hba1;Sept4;S100b;Gfap;Acly;Tf;Sh3bgrl;Scp2;Csrp1;Capn2;Rpl35;Dynlrb1;Calm2;Aars;Ctsb;Mapk3
Aging_Perturbations_from_GEO_up	Rat femur 32 weeks vs 58 weeks GDS509 aging:273	5.44016	2.6825e-11	Rpl3;Hibadh;Ctbp1;Twf1;Pebp1;Gnai2;Csrp1;Ppp2r1a;Gpc1;Capn2;Flot1;Flot2;Apoe;Ctsb;Mapk3;Prnp;Rps8;Pdyn;Eef2;S100b;Sirt2;Cs;Hadhb;Eef1g;Gnb2;Hnrnpa2b1;Gnb1;Gnas;Rpl26;Dynlrb1
Aging_Perturbations_from_GEO_up	Rat femur 6 weeks vs 52 weeks GDS509 aging:262	6.35421	6.14964e-11	Ctbp1;Hbb;Park7;Cox6a1;Gnai2;Cdc42;Rps3;Flot1;Ctsb;Mapk3;Gabarapl2;Prnp;Cyb5a;Hnrnpa3;Rps8;Idh2;Rps3a;Hba1;S100b;Hadhb;Tf;Hnrnpa2b1;Cat;Dynlrb1;Pfkm
Aging_Perturbations_from_GEO_up	Rat liver 18 months vs 24 months GSE11097 aging:201	6.33292	6.33178e-11	Rpl5;Rpl3;A1i3;Ndufa12;Hbb;Pebp1;Atp5h;Hspd1;Hebp1;Alcam;Hsph1;Rps3;Pgk1;Rpl35;Hspa5;Rps8;Rps6;Rps3a;Hba1;Eef2;Acly;Tf;Rps29;Rpl26;Pabpc1
Aging_Perturbations_from_GEO_up	Rat femur 12 weeks vs 58 weeks GDS509 aging:267	5.36549	6.65317e-11	Rpl3;Pebp1;Cox6a1;Gnai2;Acan;Csrp1;Ppp2r1a;Gpc1;Rps3;Capn2;Flot1;Rpl35;Apoe;Ctsb;Pdia3;Prnp;Hnrnpa3;Pdyn;Eef2;Sirt2;Dnm1;Fkbp1a;Eef1g;Gnb2;Gnas;Cpe;Rpl26;Slc25a5;Calm2
Aging_Perturbations_from_GEO_up	Rat thoracicaorta 3 months vs 15 months GDS3077 aging:120	5.76083	1.53011e-10	Rpl5;Ahcy;Hibadh;Ak3;Dbi;Atp5h;Gnai2;Uchl1;Csrp1;Acadl;Rps3;Capn2;Rpl35;Sptan1;Ctsb;Prnp;Ndufa5;Rps8;Idh2;Rps3a;S100b;Rab11b;Eef1g;Alb;Cpe;Rpl26
Aging_Perturbations_from_GEO_up	Rat posteriorcricoarytenoid 6 months vs 30 months GDS1278 aging:74	6.47382	2.17102e-10	Prnp;Hnrnpa3;Rpl3;Hibadh;Rps8;Rps6;Hbb;Ak3;Dbi;Rps3a;Hba1;Park7;Gnai2;Rab11b;Hadhb;Ppp1r1a;Acadl;Gnas;Rpl35;Rpl26;Apoe;Dynlrb1;Slc25a5
Aging_Perturbations_from_GEO_up	Rat femur 28 weeks vs 54 weeks GDS509 aging:271	5.59657	2.44057e-10	Rpl5;Rpl3;Gnai2;Acan;Csrp1;Ppp2r1a;Gpc1;Rpl35;Apoe;Ctsb;Pdia3;Prnp;Hnrnpa3;Rps8;Rps6;Rps3a;Sirt2;Eef1g;Glud1;Hnrnpa2b1;Gnas;Atp6v1b2;Cpe;Rpl26;Slc25a5;Calm2
Aging_Perturbations_from_GEO_up	Rat femur 10 weeks vs 56 weeks GDS509 aging:266	5.58065	2.51387e-10	Rpl5;Ctbp1;Gnai2;Acan;Csrp1;Ppp2r1a;Gpc1;Flot1;Rpl35;Apoe;Ctsb;Pdia3;Prnp;Actn2;Pdyn;Eef2;Sirt2;Dnm1;Fkbp1a;Eef1g;Hadha;Gnb2;Gnas;Cpe;Rpl26;Slc25a5
Aging_Perturbations_from_GEO_up	Rat heart 4 months vs 28 months GDS3102 aging:125	6.33163	2.90579e-10	Rpl5;Prnp;Ndrg4;Rpl3;Ndufa12;Rps8;Rps6;Hbb;Rps3a;Hba1;Eef1g;Rps29;Gpc1;Rps3;Rpl35;Rpl26;Apoe;Pabpc1;Dynlrb1;Crym;Calm2;Sptan1;Ctsb
Aging_Perturbations_from_GEO_up	Rat femur 8 weeks vs 54 weeks GDS509 aging:265	5.50236	3.01158e-10	Rpl5;Pebp1;Ak3;Cdc42;Acan;Csrp1;Ppp2r1a;Gpc1;Capn2;Pgk1;Rpl35;Apoe;Ctsb;Prnp;Hspa5;Actn2;Rps6;Rps3a;Eef2;Sirt2;Fkbp1a;Eef1g;Gnb2;Gnas;Rpl26;Calm2
Aging_Perturbations_from_GEO_up	Rat femur 7 weeks vs 53 weeks GDS509 aging:264	5.50236	3.01158e-10	Rpl3;Twf1;Gnai2;Acan;Csrp1;Ppp2r1a;Basp1;Gpc1;Capn2;Rpl35;Apoe;Ctsb;Pdia3;Gabarapl2;Prnp;Rps3a;Pdyn;Eef2;Dnm1;Eef1g;Vcan;Rps29;Gnb2;Gnas;Rpl26;Calm2
Aging_Perturbations_from_GEO_up	Rat liver 12 months vs 24 months GSE11097 aging:195	5.87826	4.25655e-10	Rpl5;Ahcy;Hibadh;A1i3;Rps6;Hbb;Ak4;Dbi;Hba1;Etfb;Suox;Hspd1;Hebp1;Acly;Tf;Alcam;Scp2;Acadl;Cat;Pccb;Slc25a5;Aldh7a1;Calm2;Ctsb
Aging_Perturbations_from_GEO_up	Rat femur 27 weeks vs 53 weeks GDS509 aging:270	5.32298	5.46307e-10	Rpl3;Twf1;Hapln1;Gnai2;Acan;Csrp1;Ppp2r1a;Basp1;Gpc1;Rps3;Capn2;Flot1;Rpl35;Ctsb;Mapk3;Pdia3;Gabarapl2;Prnp;Rps3a;Pdyn;Eef2;Dnm1;Gnb2;Gnas;Rpl26;Calm2
Aging_Perturbations_from_GEO_up	Rat femur 26 weeks vs 52 weeks GDS509 aging:268	4.91966	1.20841e-09	Rpl5;Rpl3;Ctbp1;Cox6a1;Gnai2;Hspd1;Cdc42;Acadl;Rps3;Rpl35;Ctsb;Mapk3;Pdia3;Prnp;Cyb5a;Hnrnpa3;Rps8;Rps6;Eef1g;Tf;Gnb2;Hnrnpa2b1;Cat;Rpl26;Dynlrb1;Slc25a5;Calm2
Aging_Perturbations_from_GEO_up	Rat thoracicaorta 6 months vs 28 months GDS3077 aging:123	6.39028	1.3134e-09	Prnp;Ndrg4;Rps8;Hbb;Rps3a;Hba1;Eef2;Gnai2;Eef1g;Uchl1;Csrp1;Gnb2;Rps3;Capn2;Rpl35;Cpe;Rpl26;Sptan1;Ctsb;Hspa1a;Mapk3
Aging_Perturbations_from_GEO_up	Rat liver 4 months vs 24 months GSE11097 aging:191	5.36639	4.33432e-09	Rpl5;Rpl3;Ahsg;Rps8;Rps6;Dbi;Rps3a;Hadhb;Eef1g;Glud1;Acly;Tf;Acadl;Rps29;Eef1d;Alb;Pccb;Rps3;Rpl35;Rpl26;Apoe;Slc25a5;Calm2
Aging_Perturbations_from_GEO_up	Rat femur 30 weeks vs 56 weeks GDS509 aging:272	4.63997	6.46757e-09	Rpl5;Rpl3;Ctbp1;Ak3;Gnai2;Acan;Ppp2r1a;Atp5e;Gpc1;Pgk1;Flot1;Rpl35;Ctsb;Gabarapl2;Prnp;Actn2;Rps3a;Pdyn;Eef2;Sirt2;Dnm1;Eef1g;Rps29;Gnb2;Hnrnpa2b1;Calm2
Aging_Perturbations_from_GEO_up	Rat liver 4 months vs 12 months GSE11097 aging:190	5.67374	7.72281e-09	Ahcy;A1i3;Got1;Ahsg;Ndufa12;Sord;Hbb;Dbi;Rps3a;Atp5h;Hebp1;Glud1;Acly;Tf;Scp2;Pccb;Apoe;Prodh;Slc25a5;Aldh7a1;Calm2
Aging_Perturbations_from_GEO_up	Rat diaphysealfemoralcallus 26 weeks vs 52 weeks GDS1995 aging:117	4.55229	1.68977e-08	Hibadh;Ctbp1;Ak1;Gnai2;Cdc42;Gja1;Csrp1;Ppp2r1a;Basp1;Rps3;Flot2;Apoe;Ctsb;Mapk3;Gabarapl2;Rps8;Idh2;Rps3a;Pdyn;Eef2;Rab11b;Hadhb;Tf;Dynlrb1;Calm2
Aging_Perturbations_from_GEO_up	Rat diaphysealfemoralcallus 6 weeks vs 52 weeks GDS1995 aging:116	4.90657	1.76731e-08	Actn2;Ctbp1;Ak1;Idh2;Pebp1;Pdyn;Eef2;Sirt2;Cs;Hadhb;Csrp1;Acadl;Ppp2r1a;Atp5e;Gpc1;Gnb2;Rps3;Gnas;Flot1;Apoe;Dynlrb1;Pfkm;Ctsb
Aging_Perturbations_from_GEO_up	Rat femur 8 weeks vs 28 weeks GDS509 aging:259	5.06561	2.13288e-08	Prnp;Ndufa5;Actn2;Park7;Eef2;Fkbp1a;Eef1g;Cdc42;Csrp1;Acadl;Atp5e;Gpc1;Gnb2;Dnaja2;Rps3;Pgk1;Gnas;Rpl35;Rpl26;Apoe;Dynlrb1;Pfkm
Aging_Perturbations_from_GEO_up	Rat femur 26 weeks vs 52 weeks GDS509 aging:269	5.11676	3.73009e-08	Rpl5;Hnrnpa3;Actn2;Atp5a1;Rps6;Hbb;Ak3;Eef2;Sirt2;Eef1g;Gja1;Csrp1;Acadl;Rps29;Hnrnpa2b1;Pgk1;Ncam1;Rpl26;Apoe;Calm2;Ctsb
Aging_Perturbations_from_GEO_up	Rat extensordigitorumlongusmuscles 6 months vs 30 months GDS1279 aging:70	5.03424	4.77676e-08	Rpl5;Gabarapl2;Prnp;Aldh1l1;Rpl3;Actn2;Rps8;Rps6;Eef2;Gnai2;Fkbp1a;Eef1g;Ppp2r1a;Rps29;Gpc1;Rps3;Rpl35;Ncam1;Rpl26;Apoe;Ctsb
Aging_Perturbations_from_GEO_up	Rat extraocularmuscles 6 months vs 30 months GDS1279 aging:72	4.97009	5.69973e-08	Rpl5;Prnp;Cyb5a;Rps8;Hbb;Dbi;Hba1;Eef2;Sirt2;Hspd1;Hadha;Acly;Acadl;Rps29;Atp5e;Cat;Dnaja2;Rpl26;Apoe;Calm2;Pfkm
Aging_Perturbations_from_GEO_up	Rat liver 11 months vs 24 months GSE11097 aging:200	5.0186	9.75951e-08	Rpl5;Rpl3;A1i3;Hspa5;Rps8;Rps6;Dbi;Rps3a;Hba1;Eef2;Hebp1;Acly;Tf;Alcam;Rps3;Rpl26;Pabpc1;Slc25a5;Calm2;Sptan1
Aging_Perturbations_from_GEO_up	Rat whiteadipose 4 months vs 28 months GDS3102 aging:126	5.18769	1.24379e-07	Rpl5;Prnp;Rpl3;Rps8;Rps6;Hbb;Rps3a;Hba1;Cdc42;Rps29;Oxct1;Rps3;Rpl35;Cpe;Rpl26;Apoe;Slc25a5;Calm2;Ctsb
Aging_Perturbations_from_GEO_up	Rat liver 4 months vs 24 months GSE11097 aging:193	4.87017	1.46543e-07	Rpl5;Rps6;Ak4;Dbi;Etfb;Eprs;Eef2;Fkbp1a;Hebp1;Acly;Tf;Alcam;Scp2;Alb;Pccb;Rpl35;Pabpc1;Slc25a5;Calm2;Ctsb
Aging_Perturbations_from_GEO_up	Rat liver 12 months vs 24 months GSE11097 aging:194	4.83836	1.59878e-07	Rpl5;Rpl3;Rps8;Rps6;Dbi;Rps3a;Eef2;Hadhb;Eef1g;Glud1;Acly;Acadl;Rps29;Eef1d;Atp5e;Alb;Rps3;Rpl35;Rpl26;Aars
Aging_Perturbations_from_GEO_up	Rat hippocampus 7 months vs 21 months GDS4019 aging:97	4.68581	5.01038e-07	Ndrg4;Dusp3;Hbb;Anxa11;Rps3a;Hba1;Pdyn;Sept4;S100b;Ermn;Gfap;Tf;Bag5;Scp2;Csrp1;Capn2;Calm2;Appl2;Ctsb
Aging_Perturbations_from_GEO_up	Rat femur 7 weeks vs 27 weeks GDS509 aging:258	4.7554	8.03793e-07	Cyb5a;Hnrnpa3;Rps8;Rps6;Eef1g;Cdc42;Acan;Vcan;Csrp1;Rps29;Basp1;Gpc1;Capn2;Gnas;Rpl35;Apoe;Dynlrb1;Ctsb
Aging_Perturbations_from_GEO_up	Rat femur 6 weeks vs 26 weeks GDS509 aging:256	5.99242	1.2104e-06	Gabarapl2;Ndufa5;Idh2;Hbb;Park7;Hba1;Hadhb;Ppp1r1a;Rps29;Flot2;Apoe;Dynlrb1;Pfkm;Ctsb
Aging_Perturbations_from_GEO_up	Rat ventricle 4 months vs 21 months GDS399 aging:112	5.1303	1.32038e-06	Rpl5;Prnp;Rpl3;Hibadh;Rps8;Rps6;Hbb;Rps3a;Hba1;Hadhb;Acadl;Rps29;Rps3;Rpl26;Apoe;Ctsb
Aging_Perturbations_from_GEO_up	Rat thoracicaorta 15 months vs 28 months GDS3077 aging:124	4.67499	1.91625e-06	Pdia3;Prnp;Rps8;Eef2;Gnai2;Eef1g;Tf;Uchl1;Rps29;Rpl35;Cpe;Rpl26;Apoe;Calm2;Sptan1;Ctsb;Mapk3
Aging_Perturbations_from_GEO_up	Rat femur 10 weeks vs 30 weeks GDS509 aging:260	5.03269	3.45129e-06	Pdia3;Hbb;Hba1;Pdyn;Eef2;Fkbp1a;Acan;Csrp1;Gpc1;Gnas;Flot1;Rpl35;Apoe;Dynlrb1;Slc25a5
Aging_Perturbations_from_GEO_up	Rat diaphysealfemoralcallus 6 weeks vs 26 weeks GDS1995 aging:115	4.48383	5.83997e-06	Actn2;Idh2;Pebp1;Eef2;Sirt2;Dnm1;Csrp1;Ppp2r1a;Atp5e;Gpc1;Rps3;Gnas;Rpl35;Apoe;Dynlrb1;Pfkm
Aging_Perturbations_from_GEO_up	Rat thoracicaorta 3 months vs 28 months GDS3077 aging:121	4.14659	7.75965e-06	Rpl5;Prnp;Rps8;Rps6;Rps3a;Gnai2;Rab11b;Eef1g;Uchl1;Csrp1;Rps29;Rps3;Rpl35;Cpe;Rpl26;Sptan1;Ctsb
Aging_Perturbations_from_GEO_up	Rat liver 6 months vs 18 months GSE11097 aging:197	3.90076	2.78118e-05	Rpl5;Rps8;Rps6;Gstt3;Hbb;Hba1;Hspd1;Fkbp1a;Sh3bgrl;Rps3;Rpl26;Pabpc1;Aldh7a1;Calm2;Sptan1;Ctsb
Aging_Perturbations_from_GEO_up	Rat myocardium 18 weeks vs 22 weeks GDS4025 aging:142	3.78986	0.000330152	Ndrg4;Ndufa11;Actn2;Rps29;Ndufa12;Gpc1;Idh2;Rpl35;Hba1;Eef2;Sptan1;Ctsb
Aging_Perturbations_from_GEO_up	Rat liver 4 months vs 12 months GSE11097 aging:192	3.09216	0.00109965	Gamt;Rpl5;Ndufa11;Dbi;Eprs;Eef2;Acly;Tf;Sh3bgrl;Alcam;Alb;Rpl35;Calm2
Aging_Perturbations_from_GEO_up	Rat liver 11 months vs 18 months GSE11097 aging:199	2.92419	0.00386788	Rpl5;Cyb5a;Csrp1;Rps6;Rps3;Rps3a;Rpl26;Eef2;Calm2;Sptan1;Ctsb
Aging_Perturbations_from_GEO_down	Rat ventricle 4 months vs 21 months GDS399 aging:112	7.28812	6.48891e-14	Ndrg4;Rala;Ctbp1;Atp5a1;Pebp1;Atp5h;Cox6a1;Gnai2;Hspd1;Cdc42;Ppp2r1a;Atp5e;Pgk1;Flot1;Flot2;Mapk3;Ndufa5;Actn2;Idh2;Pdyn;Eef2;Cs;Fkbp1a;Eef1g;Hadha;Ivd;Gnas;Dynlrb1;Slc25a5;Pfkm
Aging_Perturbations_from_GEO_down	Rat thoracicaorta 6 months vs 28 months GDS3077 aging:123	7.51456	7.89689e-14	Rpl5;Slc27a1;Hibadh;Ctbp1;Atp5a1;Dbi;Atp5h;Cox6a1;Hspd1;Hsph1;Acadl;Atp5e;Pgk1;Cyb5a;Ndufa5;Rps6;Idh2;Bckdhb;Cs;Hadhb;Hadha;Acly;Rps29;Hnrnpa2b1;Cat;Gnas;Slc25a5;Aldh7a1;Gstm5
Aging_Perturbations_from_GEO_down	Rat hippocampus 7 months vs 21 months GDS4019 aging:98	7.6113	1.29703e-13	Gpm6a;Ctbp1;Ptprn;Wipf3;Atp5a1;Itpr1;Atp5h;Park7;Cdc42;Hsph1;Bag5;Camkv;Rps3;Sptan1;Gria3;Got1;Hspa5;Slc2a13;Rps6;Anxa11;Glud1;Olfm1;Ppp1r1a;Rimbp2;Cntn1;Atp6v1b2;Cpe;Scg2
Aging_Perturbations_from_GEO_down	Rat thoracicaorta 3 months vs 15 months GDS3077 aging:120	9.0853	2.62319e-13	Slc27a1;Hspa5;Atp5a1;Hbb;Hba1;Pdyn;Eef2;Hspd1;Hadhb;Hadha;Acly;Gja1;Tf;Hsph1;Pcca;Rps29;Atp5e;Gnas;Flot1;Apoe;Slc25a5;Calm2;Pfkp;Hspa1a
Aging_Perturbations_from_GEO_down	Rat thoracicaorta 6 months vs 15 months GDS3077 aging:122	7.60694	3.29941e-13	Rpl5;Slc27a1;Atp5a1;Atp5h;Cox6a1;Hspd1;Hsph1;Acadl;Atp5e;Pgk1;Apoe;Cyb5a;Hspa5;Ndufa5;Rps6;Hadhb;Eef1g;Hadha;Acly;Rps29;Hnrnpa2b1;Cat;Gnas;Slc25a5;Calm2;Pfkp;Gstm5
Aging_Perturbations_from_GEO_down	Rat femur 6 weeks vs 26 weeks GDS509 aging:256	6.35416	3.9276e-13	Rpl5;Rpl3;Ctbp1;Atp5a1;Gnai2;Hspd1;Cdc42;Csrp1;Ppp2r1a;Atp5e;Gpc1;Rps3;Pgk1;Rpl35;Mapk3;Pdia3;Hnrnpa3;Hspa5;Actn2;Rps8;Rps6;Eef2;Eef1g;Tf;Gnb2;Hnrnpa2b1;Gnas;Cpe;Rpl26;Slc25a5;Calm2
Aging_Perturbations_from_GEO_down	Rat hippocampus CA3 18 months vs 28 months GSE21681 aging:355	8.15887	5.07332e-13	Rpl5;Gpm6a;Ndrg4;Ctbp1;Atp5a1;Atp5h;Scp2;Oxct1;Rps3;Crym;Rgs7;Prnp;Dusp3;Hspa5;Rps8;Rps6;Rps3a;Snap91;Gap43;Gnas;Atp6v1b2;Cpe;Sugt1;Slc25a5;Calm2
Aging_Perturbations_from_GEO_down	Rat frontalcortex 4 months vs 22 months GDS3939 aging:99	6.96406	1.55631e-12	Gpm6a;Ndrg4;Atp5a1;Hspd1;Uchl1;Pak1;Alcam;Hsph1;Oxct1;Mapk1;Sptan1;Rgs7;Marcksl1;Got1;Hspa5;Eef2;Dnm1;Fkbp1a;Glud1;Olfm1;Gnb1;Cpe;Nptxr;Slc25a5;Scg2;Pfkp;Aars
Aging_Perturbations_from_GEO_down	Rat thoracicaorta 3 months vs 28 months GDS3077 aging:121	7.60401	1.84023e-12	Slc27a1;Ctbp1;Atp5a1;Hbb;Dbi;Atp5h;Cox6a1;Hspd1;Hsph1;Acadl;Atp5e;Flot1;Hspa5;Ndufa5;Idh2;Bckdhb;Hba1;Cs;Hadhb;Hadha;Acly;Cat;Gnas;Slc25a5;Hspa1a
Aging_Perturbations_from_GEO_down	Rat femur 7 weeks vs 27 weeks GDS509 aging:258	7.01365	8.40714e-12	Rpl5;Hibadh;Atp5a1;Ak1;Hbb;Atp5h;Hspd1;Acadl;Atp5e;Pgk1;Flot1;Got1;Ndufa5;Actn2;Idh2;Hba1;Hadhb;Hadha;Hnrnpa2b1;Atp6v1b2;Cpe;Rpl26;Slc25a5;Calm2;Pfkm
Aging_Perturbations_from_GEO_down	Rat thoracicaorta 15 months vs 28 months GDS3077 aging:124	6.37598	1.17973e-10	Rpl5;Ndufa5;Ctbp1;Atp5a1;Idh2;Hbb;Dbi;Rps3a;Atp5h;Hba1;Cox6a1;Hspd1;Cs;Hadhb;Acly;Csrp1;Acadl;Atp5e;Rps3;Capn2;Dynlrb1;Slc25a5;Aldh7a1;Hspa1a
Aging_Perturbations_from_GEO_down	Rat myocardium 18 weeks vs 22 weeks GDS4025 aging:142	5.78884	2.78928e-10	Rpl5;Hibadh;Atp5a1;Dbi;Atp5h;Park7;Etfb;Hspd1;Scp2;Acadl;Oxct1;Atp5e;Rps3;Got1;Hspa5;Ndufa5;Rps8;Rps6;Bckdhb;Rps3a;Hadhb;Dnaja2;Cpe;Rpl26;Slc25a5
Aging_Perturbations_from_GEO_down	Rat hippocampus dentate gyrus 18 months vs 28 months GSE21681 aging:357	7.38022	4.05872e-10	Rpl5;Gpm6a;Prnp;Ndrg4;Hspa5;Atp5a1;Rps6;Itpr1;Rps3a;Atp5h;Snap91;Olfm1;Rps3;Atp6v1b2;Cpe;Stxbp6;Slc25a5;Crym;Calm2;Rgs7
Aging_Perturbations_from_GEO_down	Rat heart 4 months vs 28 months GDS3102 aging:125	6.01068	1.65542e-09	Hibadh;Ndufa11;Got1;Hspa5;Actn2;Atp5a1;Idh2;Bckdhb;Pebp1;Coq9;Etfb;Cox6a1;Cs;Hadhb;Hadha;Gja1;Acadl;Oxct1;Atp5e;Pgk1;Cpe;Pfkm
Aging_Perturbations_from_GEO_down	Rat femur 10 weeks vs 30 weeks GDS509 aging:260	5.38638	2.12944e-09	Gabarapl2;Cyb5a;Hnrnpa3;Ndufa5;Ctbp1;Rps8;Atp5a1;Rps6;Ak3;Rps3a;Atp5h;Hspd1;Hadhb;Eef1g;Tf;Rps29;Atp5e;Hnrnpa2b1;Cat;Rps3;Pgk1;Hnrnpa1;Calm2;Pfkm
Aging_Perturbations_from_GEO_down	Rat whiteadipose 4 months vs 28 months GDS3102 aging:126	5.88188	2.30395e-09	Cyb5a;Ndufa11;Hspa5;Atp5a1;Dbi;Atp5h;Etfb;Cox6a1;S100b;Hspd1;Cs;Hadhb;Fkbp1a;Acly;Sh3bgrl;Dlg2;Scp2;Acadl;Cat;Pgk1;Gnas;Rgs7
Aging_Perturbations_from_GEO_down	Rat femur 6 weeks vs 26 weeks GDS509 aging:257	6.50295	6.18926e-09	Rpl5;Got1;Actn2;Rps8;Atp5a1;Rps6;Hbb;Hba1;Dnm1;Gnai2;Tf;Csrp1;Rps29;Pgk1;Gnas;Atp6v1b2;Cpe;Apoe;Ctsb
Aging_Perturbations_from_GEO_down	Rat hippocampus CA1 18 months vs 28 months GSE21681 aging:353	6.03783	7.26649e-09	Gpm6a;Ndrg4;Ctbp1;Rps8;Atp5a1;Rps6;Itpr1;Rps3a;Snap91;Cdc42;Gap43;Scp2;Oxct1;Rps3;Atp6v1b2;Dynlrb1;Slc25a5;Crym;Calm2;Rgs7
Aging_Perturbations_from_GEO_down	Rat femur 28 weeks vs 54 weeks GDS509 aging:271	6.79192	7.94993e-09	Got1;Ndufa5;Actn2;Ak1;Idh2;Hbb;Atp5h;Hba1;Park7;Hspd1;Hadhb;Hadha;Ppp1r1a;Acadl;Atp5e;Dnaja2;Rps3;Pfkm
Aging_Perturbations_from_GEO_down	Rat femur 26 weeks vs 52 weeks GDS509 aging:268	8.21377	1.58276e-08	Gabarapl2;Ndrg4;Got1;Ndufa5;Actn2;Atp5a1;Hbb;Rps3a;Hba1;Ppp1r1a;Rps29;Atp5e;Gpc1;Gnas;Pfkm
Aging_Perturbations_from_GEO_down	Rat femur 26 weeks vs 52 weeks GDS509 aging:269	5.71379	3.85571e-08	Pdia3;Ctbp1;Rps8;Rps3a;Atp5h;Park7;Cox6a1;Gnai2;Hspd1;Cdc42;Acan;Vcan;Basp1;Rps3;Gnas;Cpe;Dynlrb1;Slc25a5;Sptan1
Aging_Perturbations_from_GEO_down	Rat femur 6 weeks vs 52 weeks GDS509 aging:262	5.62266	4.82097e-08	Rpl5;Actn2;Atp5a1;Rps6;Ak1;Pebp1;Eef2;Dnm1;Eef1g;Acan;Rps29;Atp5e;Gpc1;Pgk1;Gnas;Rpl35;Cpe;Rpl26;Calm2
Aging_Perturbations_from_GEO_down	Rat posteriorcricoarytenoid 6 months vs 30 months GDS1278 aging:74	5.26807	5.57436e-08	Gabarapl2;Got1;Ndufa5;Actn2;Ctbp1;Atp5a1;Idh2;Bckdhb;Pebp1;Pdyn;Eef2;Hspd1;Rps29;Atp5e;Ivd;Gpc1;Pgk1;Cpe;Pfkm;Hspa1a
Aging_Perturbations_from_GEO_down	Rat liver 4 months vs 12 months GSE11097 aging:192	5.49121	6.63434e-08	Aldh1l1;Ahcy;Hibadh;A1i3;Got1;Ahsg;Idh2;Hba1;Suox;Hspd1;Glud1;Scp2;Cbs;Ivd;Cat;Rps3;Prodh;Aldh7a1;Pfkm
Aging_Perturbations_from_GEO_down	Rat diaphysealfemoralcallus 6 weeks vs 26 weeks GDS1995 aging:115	5.03565	1.04925e-07	Pdia3;Gabarapl2;Rps8;Rps6;Hbb;Rps3a;Atp5h;Hba1;Cox6a1;Hspd1;Fkbp1a;Cdc42;Acan;Gja1;Tf;Basp1;Hnrnpa2b1;Cpe;Rpl26;Gstm5
Aging_Perturbations_from_GEO_down	Rat extraocularmuscles 6 months vs 30 months GDS1279 aging:72	5.57279	1.15409e-07	Gabarapl2;Ndrg4;Ndufa5;Atp5a1;Idh2;Rps3a;Atp5h;Dnm1;Gnai2;Hadhb;Eef1g;Glud1;Tf;Pgk1;Flot1;Dynlrb1;Ctsb;Hspa1a
Aging_Perturbations_from_GEO_down	Rat femur 7 weeks vs 53 weeks GDS509 aging:264	6.11533	1.86042e-07	Got1;Ndufa5;Actn2;Atp5a1;Ak1;Idh2;Hbb;Atp5h;Hba1;Hadha;Ppp1r1a;Atp5e;Atp6v1b2;Cpe;Slc25a5;Pfkm
Aging_Perturbations_from_GEO_down	Rat liver 4 months vs 24 months GSE11097 aging:193	5.32749	2.02283e-07	Cyb5a;Aldh1l1;Ahcy;Got1;Ahsg;Idh2;Gstt3;Hbb;Hba1;Hadhb;Glud1;Rps29;Ivd;Cat;Pgk1;Prodh;Crym;Pfkm
Aging_Perturbations_from_GEO_down	Rat femur 32 weeks vs 58 weeks GDS509 aging:273	7.50949	3.43385e-07	Rpl5;Cyb5a;Ndufa5;Rps6;Atp5a1;Hbb;Hba1;Rps29;Atp5e;Rpl35;Cpe;Pfkm;Gstm5
Aging_Perturbations_from_GEO_down	Rat hippocampus CA3 18 months vs 28 months GSE21681 aging:356	5.75727	3.79432e-07	Gpm6a;Prnp;Ndrg4;Hspa5;Ctbp1;Atp5a1;Rps6;Rps3a;Snap91;Oxct1;Dnaja2;Pgk1;Atp6v1b2;Cpe;Slc25a5;Calm2
Aging_Perturbations_from_GEO_down	Rat femur 27 weeks vs 53 weeks GDS509 aging:270	6.05617	4.8501e-07	Cyb5a;Ndufa5;Actn2;Rps8;Atp5a1;Hbb;Atp5h;Hba1;Park7;Cdc42;Rps29;Atp5e;Apoe;Dynlrb1;Pfkm
Aging_Perturbations_from_GEO_down	Rat liver 12 months vs 24 months GSE11097 aging:194	5.03238	8.76915e-07	Aldh1l1;Ahcy;Hibadh;A1i3;Got1;Hspa5;Gstt3;Hbb;Pebp1;Atp5h;Hba1;Scp2;Cbs;Ivd;Cat;Prodh;Aldh7a1
Aging_Perturbations_from_GEO_down	Rat hippocampus dentate gyrus 18 months vs 28 months GSE21681 aging:358	4.95274	1.05405e-06	Gpm6a;Prnp;Ndrg4;Hspa5;Ctbp1;Atp5a1;Rps6;Itpr1;Rps3a;Snap91;Rps3;Atp6v1b2;Sugt1;Slc25a5;Crym;Calm2;Rgs7
Aging_Perturbations_from_GEO_down	Rat hippocampus CA1 18 months vs 28 months GSE21681 aging:354	5.1303	1.42037e-06	Gpm6a;Prnp;Hspa5;Rps8;Atp5a1;Rps6;Itpr1;Rps3a;Snap91;Cdc42;Dnaja2;Rps3;Atp6v1b2;Calm2;Gpr158;Rgs7
Aging_Perturbations_from_GEO_down	Rat liver 11 months vs 18 months GSE11097 aging:199	4.52797	1.59314e-06	Gamt;Aldh1l1;Ahcy;Hibadh;Ahsg;Ndufa12;Bckdhb;Gstt3;Sord;Pebp1;Glud1;Acly;Atp5e;Ivd;Pgk1;Apoe;Prodh;Aars
Aging_Perturbations_from_GEO_down	Rat diaphysealfemoralcallus 6 weeks vs 52 weeks GDS1995 aging:116	5.4033	1.68415e-06	Pdia3;Rpl5;Hnrnpa3;Hspa5;Rps8;Rps6;Hbb;Rps3a;Hba1;Cox6a1;Hspd1;Tf;Rps29;Cpe;Rpl26
Aging_Perturbations_from_GEO_down	Rat liver 4 months vs 12 months GSE11097 aging:190	4.4901	3.37409e-06	Pdia3;Cyb5a;Hspa5;Rps8;Gstt3;Hba1;Eprs;Eef2;Acadl;Rps29;Atp5e;Cat;Rps3;Rpl35;Blvrb;Aars;Ctsb
Aging_Perturbations_from_GEO_down	Rat femur 10 weeks vs 56 weeks GDS509 aging:266	5.12451	6.4769e-06	Ndufa5;Rps8;Idh2;Hbb;Rps3a;Atp5h;Hba1;Hspd1;Tf;Ppp1r1a;Rps29;Rps3;Flot2;Pfkm
Aging_Perturbations_from_GEO_down	Rat femur 6 weeks vs 52 weeks GDS509 aging:263	5.09901	6.69458e-06	Rps8;Idh2;Hbb;Rps3a;Hba1;Gnai2;Tf;Rps29;Basp1;Gnas;Atp6v1b2;Cpe;Apoe;Slc25a5
Aging_Perturbations_from_GEO_down	Rat liver 4 months vs 24 months GSE11097 aging:191	4.70919	7.45115e-06	Aldh1l1;Ahcy;Hibadh;A1i3;Got1;Hspa5;Bckdhb;Gstt3;Hbb;Pebp1;Hba1;Ivd;Cat;Prodh;Aldh7a1
Aging_Perturbations_from_GEO_down	Rat extensordigitorumlongusmuscles 6 months vs 30 months GDS1279 aging:70	4.46035	1.3404e-05	Got1;Ndufa5;Atp5a1;Ak1;Bckdhb;Hbb;Hba1;Cs;Glud1;Hadha;Ppa2;Ppp1r1a;Atp5e;Dynlrb1;Pfkm
Aging_Perturbations_from_GEO_down	Rat femur 30 weeks vs 56 weeks GDS509 aging:272	6.02236	1.64676e-05	Ppp1r1a;Ndufa5;Idh2;Hbb;Flot2;Park7;Atp5h;Apoe;Hba1;Slc25a5;Pfkm
Aging_Perturbations_from_GEO_down	Rat liver 6 months vs 18 months GSE11097 aging:197	4.1876	2.44936e-05	Gamt;Aldh1l1;A1i3;Hspa5;Ahsg;Sord;Dbi;Glud1;Acly;Scp2;Rps29;Atp5e;Ivd;Pgk1;Aars
Aging_Perturbations_from_GEO_down	Rat femur 8 weeks vs 28 weeks GDS509 aging:259	4.39745	2.80022e-05	Gabarapl2;Rpl3;Ctbp1;Rps8;Rps6;Hbb;Rps3a;Hba1;Gnai2;Tf;Hnrnpa2b1;Atp6v1b2;Cpe;Calm2
Aging_Perturbations_from_GEO_down	Rat thoracicaorta 3 months vs 6 months GDS3077 aging:119	4.71272	5.8412e-05	Cs;Gpc1;Gnb2;Idh2;Gnas;Flot1;Hbb;Hba1;Dynlrb1;Eef2;Gnai2;Hspa1a
Aging_Perturbations_from_GEO_down	Rat liver 12 months vs 24 months GSE11097 aging:195	3.8055	0.000194425	Gamt;Cyb5a;Aldh1l1;Hspa5;Rps8;Gstt3;Sord;Cox6a1;Glud1;Rps29;Rpl35;Blvrb;Apoe
Aging_Perturbations_from_GEO_down	Rat femur 12 weeks vs 32 weeks GDS509 aging:261	3.99904	0.0002246	Tf;Ahcy;Ctbp1;Rps29;Rps8;Atp5a1;Rps6;Flot1;Hbb;Rpl26;Atp5h;Hba1
Aging_Perturbations_from_GEO_down	Rat hippocampus 7 months vs 21 months GDS4019 aging:97	3.61569	0.000302344	Cul1;Hspa12a;Snap91;Gap43;Alcam;Oxct1;Gnas;Flot1;Atp6v1b2;Crym;Sptan1;Scg2;Pfkp
Aging_Perturbations_from_GEO_down	Rat liver 11 months vs 24 months GSE11097 aging:200	3.57452	0.00033377	Gamt;Aldh1l1;Ahcy;Hibadh;Fech;Bckdhb;Gstt3;Sord;Pebp1;Scp2;Atp5e;Cat;Prodh
Aging_Perturbations_from_GEO_down	Rat femur 8 weeks vs 54 weeks GDS509 aging:265	4.02139	0.000382308	Hadhb;Hadha;Ppp1r1a;Got1;Ctbp1;Rps8;Ak1;Hbb;Cpe;Atp5h;Hba1
Aging_Perturbations_from_GEO_down	Rat diaphysealfemoralcallus 26 weeks vs 52 weeks GDS1995 aging:117	4.45528	0.000677896	Rps29;Atp5e;Rps6;Atp5a1;Gnas;Cpe;Hbb;Rpl26;Dnm1
Aging_Perturbations_from_GEO_down	Rat liver 6 months vs 24 months GSE11097 aging:198	3.18307	0.00219733	Gamt;Glud1;Aldh1l1;Ahcy;Scp2;Hibadh;Atp5e;Cat;Gstt3;Sord;Cox6a1
Aging_Perturbations_from_GEO_down	Rat hippocampus CA3 region 6 months vs 25 months GSE14724 aging:347	2.96634	0.00560347	Gamt;Psd;Dgkg;Cdv3;Cadm3;Dpysl4;Prep;Ncam1;Adap1;Stx1a
Aging_Perturbations_from_GEO_down	Rat femur 12 weeks vs 58 weeks GDS509 aging:267	2.9577	0.0329594	Tf;Rps29;Rps6;Atp5a1;Hbb;Hba1
Aging_Perturbations_from_GEO_down	Rat liver 6 months vs 11 months GSE11097 aging:196	2.3458	0.0424807	Glud1;Scp2;Csrp1;A1i3;Got1;Rps29;Rps3a;Cox6a1
PPI_Hub_Proteins	YWHAB	12.598	7.19267e-54	Cntfr;Rpl5;Aldh1l1;Cntnap1;Ap2a2;Hapln1;Gja1;Grm5;Dpysl4;Camkv;Ppp2r1a;Dpysl5;Basp1;Palm;Flot1;Tnr;Flot2;Vps35;Sbf1;Rgs7;Actn2;Rps8;Actn1;Prkca;Ank2;Rps3a;Sept4;Syn2;Dnm1;Epn2;Hadhb;Eef1g;Hadha;Olfm1;Acly;Gap43;Vcan;Pcca;Atp6v1b2;Pabpc1;Rin1;Slc25a5;Stx1a;Nlgn3;Gpm6a;Rala;Ntm;Atp5a1;Itpr1;Lin7a;Add3;Cacna1e;Gnai2;Hspd1;Grin2a;Hsph1;Ptprz1;Epb41l2;Adrbk1;Rps3;Rpl13;Ncam1;Camk2g;Sptbn1;Gpr158;Gria3…
PPI_Hub_Proteins	DLG4	11.5082	2.39821e-29	Cpne7;Pebp1;Dbi;Park7;Ppp2r1a;Basp1;Tnr;Sptan1;Pdia3;Actn2;Actn1;Lancl1;Prkca;Syn2;Sirt2;Dnm1;Eef1g;Atp6v1b2;Slc25a5;Otub1;Nlgn3;Gpm6a;Atp5a1;Lin7a;Gnai2;Hspd1;Grin2a;Ptprz1;Oxct1;Rps3;Pgk1;Mapk1;Crym;Sptbn1;Gria3;Mapk3;Got1;Hspa5;Atp2b4;Hspa12a;Cs;Fkbp1a;Glud1;Dlg2;Dlg3;Gnb1;Cntn1;Pfkm;Pfkp
PPI_Hub_Proteins	SLC2A4	8.34001	4.93121e-27	Rpl5;Hibadh;Park7;Ap2a2;Ppp2r1a;Flot1;Ctsb;Pdia3;Rps8;Actn1;Rps6;Rps3a;Hadhb;Hadha;Acly;Eef1d;Ddah2;Cat;Pccb;Acot2;Atp6v1b2;Cdh13;Rpl26;Pabpc1;Slc25a5;Ahcy;Atp5a1;Ak3;Atp5h;Pld3;Gnai2;Hspd1;Cand1;Gpc1;Rps3;Rpl13;Mapk1;Ncam1;Camk2g;Mapk3;Hspa5;Atad3;Idh2;Timm44;Eef2;Rab11b;Cs;Aimp1;Glud1;Tf;Ehd3;Gnb2;Caprin1;Gnb1;Gnas;Dynlrb1
PPI_Hub_Proteins	GABARAPL2	6.27329	2.03017e-15	Rpl5;Rpl3;Atp5a1;Hbb;Pebp1;Lin7a;Eprs;Hspd1;Pcmt1;Hsph1;Ppp2r1a;Rps3;Rpl13;Vps35;Hnrnpa1;Sptan1;Sptbn1;Pdia3;Gabarapl2;Hnrnpa3;Hspa5;Rps8;Rps6;Lancl1;Ank2;Eef2;Rangap1;Gfap;Hadhb;Eef1g;Hadha;Hnrnpa2b1;Alb;Hnrnpd;Hyou1;Pabpc1;Slc25a5;Pfkp;Hspa1a
PPI_Hub_Proteins	GRIN2B	9.94662	3.65808e-14	Rala;Atp5a1;Lin7a;Grin2a;Grm5;Ppp2r1a;Rpl13;Mapk1;Camk2g;Sptbn1;Appl1;Mapk3;Actn2;Atp2b4;Prkca;L1cam;Dnm1;Gap43;Dlg2;Dlg3;Gnb2;Gnb1;Gnas;Slc25a5;Stx1a
PPI_Hub_Proteins	GABARAPL1	5.77065	1.02772e-12	Rpl5;Rpl3;Ahcy;Atp5a1;Hspd1;Hsph1;Ppp2r1a;Rps3;Pgk1;Rpl13;Hnrnpa1;Sptan1;Sptbn1;Pdia3;Gabarapl2;Hnrnpa3;Hspa5;Rps8;Actn1;Rps6;Ank2;Eef2;Gfap;Hadhb;Eef1g;Hadha;Tf;Hnrnpa2b1;Alb;Cat;Hnrnpd;Pabpc1;Slc25a5;Hspa1a
PPI_Hub_Proteins	MAP1LC3B	6.77118	2.6488e-11	Ahcy;Atp5a1;Hspd1;Pcmt1;Hsph1;Ppp2r1a;Rps3;Hnrnpa1;Sptan1;Sptbn1;Gabarapl2;Hnrnpa3;Hspa5;Rps8;Eef2;Gfap;Hadhb;Eef1g;Hadha;Eef1d;Hnrnpa2b1;Alb;Dnaja2;Hnrnpd;Slc25a5;Hspa1a
PPI_Hub_Proteins	MAP1LC3A	6.11015	3.28059e-11	Rpl5;Rpl3;Ahcy;Atp5a1;Eprs;Pcmt1;Hsph1;Mthfd1l;Rps3;Rpl13;Hnrnpa1;Sptan1;Sptbn1;Gabarapl2;Hnrnpa3;Hspa5;Rps8;Eef2;Gfap;Hadhb;Eef1g;Hadha;Hnrnpa2b1;Alb;Hnrnpd;Pabpc1;Slc25a5;Hspa1a
PPI_Hub_Proteins	MAP3K1	9.24466	4.62761e-11	Rpl3;Hspa5;Rps8;Actn2;Rps6;Hadhb;Cdc42;Glud1;Hadha;Pak1;Hsph1;Bag5;Rpl35;Rac3;Rpl13;Mapk1;Slc25a5;Calm2;Mapk3;Hspa1a
PPI_Hub_Proteins	MAP3K14	9.76873	6.08975e-11	Rpl5;Rpl3;Hspa5;Rps8;Rps6;Atp5a1;Pebp1;Rps3a;Eprs;Glud1;Pak1;Rps3;Rpl35;Rpl13;Pabpc1;Hnrnpa1;Calm2;Mapk3;Hspa1a
PPI_Hub_Proteins	GRIN1	10.3534	8.49394e-11	Rala;Actn2;Atp2b4;L1cam;Dnm1;Grin2a;Grm5;Gap43;Dlg2;Dlg3;Ppp2r1a;Mapk1;Sptan1;Stx1a;Sptbn1;Appl1;Mapk3;Hspa1a
PPI_Hub_Proteins	PRKCE	8.75969	8.49559e-11	Hspa5;Actn2;Atp5a1;Prkca;Adap1;Dnm1;Gnai2;Hspd1;Hadhb;Tiam1;Hadha;Gja1;Grm5;Hnrnpa2b1;Hnrnpd;Rps3;Mapk1;Slc25a5;Hspa1a;Mapk3
PPI_Hub_Proteins	GABARAP	4.98784	7.98048e-10	Rpl5;Rpl3;Ahcy;Atp5a1;Hspd1;Hsph1;Ppp2r1a;Cbs;Rps3;Rpl13;Hnrnpa1;Sptan1;Gabarapl2;Hnrnpa3;Hspa5;Rps8;Rps6;Eef2;Gfap;Hadhb;Eef1g;Hadha;Hnrnpa2b1;Alb;Hnrnpd;Pabpc1;Slc25a5;Gla;Hspa1a
PPI_Hub_Proteins	PRKCA	4.49359	3.72436e-09	Gpm6a;Pebp1;Aqp4;Add3;Cdc42;Gja1;Grin2a;Grm5;Ppp2r1a;Adrbk1;Palm;Mapk1;Camk2g;Rgs7;Mapk3;Rps6;Prkca;L1cam;Eef2;Adap1;Dnm1;Gfap;Tiam1;Tf;Gap43;Ppp1r1a;Dlg3;Eef1d;Kit;Hspa1a
PPI_Hub_Proteins	SNCA	5.74209	4.81441e-09	Cntfr;Ndufa11;Hspa5;Ndufa5;Ndufa12;Ntm;Ank2;Atp5h;Cox6a1;Sept4;Uchl1;Adrbk1;Gnb2;Hnrnpa2b1;Gnb1;Cntn1;Atp6v1b2;Mapk1;Sptan1;Stx1a;Sptbn1;Hspa1a;Mapk3
PPI_Hub_Proteins	EGFR	4.714	8.94127e-09	Gnai2;Hspd1;Uchl1;Sh3bgrl;Pak1;Alcam;Csrp1;Adrbk1;Mapk1;Ncam1;Camk2g;Snx6;Appl1;Mapk3;Gabarapl2;Dusp3;Got1;Hspa5;Prkca;Eef1g;Olfm1;Dnaja2;Pabpc1;Rin1;Slc25a5;Calm2;Hspa1a
PPI_Hub_Proteins	GRB2	3.73659	1.22593e-08	Hist2h2aa3;Cntfr;Cntnap1;Rpl3;Celf2;Atp5a1;Cox6a1;Hspd1;Pcmt1;Pak1;Rps3;Rpl13;Mapk1;Hnrnpa1;Sptan1;Sptbn1;Gstm3;Prnp;Hspa5;Ahsg;Rps8;Actn1;Ank2;Rps3a;Eef2;Dnm1;Hadhb;Eef1g;Tf;Kit;Hnrnpa2b1;Cat;Dnaja2;Rpl26;Pabpc1
PPI_Hub_Proteins	ARRB2	5.54482	1.65546e-08	Rpl3;Hspa5;Rps8;Rps6;Rps3a;Eef2;Rangap1;Ap2a2;Cdc42;Ppp2r1a;Hnrnpd;Rps3;Rpl35;Mapk1;Vps35;Rpl26;Pabpc1;Hnrnpa1;Sptan1;Sptbn1;Hspa1a;Mapk3
PPI_Hub_Proteins	MAPK13	9.01417	1.65546e-08	Pdia3;Dusp3;Ahcy;Hspa5;Atp5a1;Eprs;Eef2;Cacna1e;Cdc42;Eef1d;Pgk1;Rps3;Pabpc1;Hnrnpa1;Camk2g
PPI_Hub_Proteins	CDK1	3.81594	5.24901e-08	Itpr1;Lmnb2;Gnai2;Gja1;Grin2a;Pak1;Grm5;Ppp2r1a;Ca2;Epb41l2;Palm;Pgk1;Efhd2;Ncam1;Hnrnpa1;Sptbn1;Appl1;Pdia3;Ank2;Eef2;Rangap1;Snap91;Sirt2;Dnm1;Gfap;Acly;Ppp1r1a;Eef1d;Gnb2;Gnb1;Hnrnpd
PPI_Hub_Proteins	IKBKE	4.44388	8.3288e-08	Rpl3;Cul1;Twf1;Etfb;Eprs;Pcmt1;Uchl1;Pak1;Ppp2r1a;Sptan1;Sptbn1;Rps3a;Tpd52l2;Aimp1;Hadha;Acly;Eef1d;Gnb2;Hyou1;Pabpc1;Calm2;Pfdn5;Aars;Hspa1a;Otub1
PPI_Hub_Proteins	ESR1	3.81138	2.48195e-07	Rpl5;Rpl3;Hspd1;Pak1;Rps3;Rpl13;Mapk1;Hnrnpa1;Sptan1;Sptbn1;Mapk3;Hnrnpa3;Hspa5;Rps8;Actn1;Rps6;Prkca;Rps3a;Tf;Gnb2;Caprin1;Hnrnpa2b1;Gnb1;Hnrnpd;Pabpc1;Slc25a5;Calm2;Hspa1a
PPI_Hub_Proteins	EIF2C1	7.01736	3.02637e-07	Gabarapl2;Prnp;Rps8;Rps6;Rps3a;Eprs;Hspd1;Dnaja2;Rps3;Rpl35;Rpl13;Rpl26;Pabpc1;Slc25a5;Hnrnpa1
PPI_Hub_Proteins	HSP90AB1	7.6909	8.97733e-07	Rpl5;Gabarapl2;Actn1;Rps6;Rps3a;Eef2;Gnai2;Hsph1;Pgk1;Hnrnpa1;Sptan1;Aars;Hspa1a
PPI_Hub_Proteins	APP	5.51997	9.03732e-07	Pdia3;Prnp;Hspa5;Dnm1;Gfap;Hadhb;Uchl1;Gpc1;Cat;Cntn1;Flot1;Cpe;Hyou1;Ncam1;Apoe;Sptan1;Stx1a
PPI_Hub_Proteins	MAP3K3	5.64697	1.53051e-06	Hspa5;Atp5a1;Prkca;Gnai2;Pak1;Bag5;Ppp2r1a;Gnb2;Gnb1;Sugt1;Slc25a5;Calm2;Sptan1;Pfdn5;Sptbn1;Hspa1a
PPI_Hub_Proteins	YWHAZ	3.82042	1.75816e-06	Rpl5;Gabarapl2;Ahcy;Hspa5;Atp5a1;Lancl1;Prkca;Eprs;Eef2;Syn2;Hspd1;Pak1;Hsph1;Cand1;Epb41l2;Rps3;Pgk1;Rin1;Hnrnpa1;Sptan1;Sptbn1;Pfkp;Aars;Hspa1a
PPI_Hub_Proteins	CALM1	4.43232	1.8418e-06	Rala;Itpr1;Prkca;Hspa12a;Sept4;Syn2;Tpd52l2;Sirt2;Grm5;Gap43;Camkv;Mthfd1l;Dlg3;Basp1;Eef1d;Epb41l2;Sbf1;Sptan1;Camk2g;Pfkp
PPI_Hub_Proteins	MCC	4.60605	8.37638e-06	Dusp3;Ahcy;Cul1;Rps3a;Eprs;Cs;Aimp1;Pcmt1;Uchl1;Ppp2r1a;Eef1d;Gnb1;Vps35;Hyou1;Pfkm;Pfkp;Otub1
PPI_Hub_Proteins	CDK2	3.16633	9.63413e-06	Cul1;Pebp1;Add3;Cacna1e;Lmnb2;Pak1;Mthfd1l;Adrbk1;Palm;Rps3;Efhd2;Mapk1;Ncam1;Camk2g;Sptbn1;Mapk3;Marcksl1;Ank2;Eef2;Rangap1;Tpd52l2;Sirt2;Dnm1;Acly;Dlg2;Hnrnpd;Pabpc1
PPI_Hub_Proteins	TNIK	7.34532	1.02783e-05	Pcmt1;Uchl1;Hnrnpa3;Got1;Ppp2r1a;Sord;Mapk1;Ank2;Sept4;Sptbn1;Otub1
PPI_Hub_Proteins	PRKCB	4.19755	1.29837e-05	Marcksl1;Actn1;Pebp1;Prkca;Ank2;Rangap1;Add3;Gfap;Tiam1;Gja1;Grm5;Gap43;Ppp2r1a;Adrbk1;Kit;Ncam1;Sptan1;Sptbn1
PPI_Hub_Proteins	CAV1	7.08614	1.33525e-05	Prnp;Gja1;Scp2;Adrbk1;Flot1;Flot2;Mapk1;Pfkm;Dnm1;Gnai2;Mapk3
PPI_Hub_Proteins	IL7R	6.96326	1.51697e-05	Pdia3;Tf;Sh3bgrl;Hspa5;Alb;Pebp1;Mapk1;Park7;Hspd1;Mapk3;Hspa1a
PPI_Hub_Proteins	DYNLL1	5.64209	1.60447e-05	Hip1r;Cs;Glud1;Grin2a;Pak1;Dlg2;Dlg3;Ppp2r1a;Ca2;Dynlrb1;Pabpc1;Pfkm;Pfkp
PPI_Hub_Proteins	EIF2C2	6.13346	1.70323e-05	Gabarapl2;Rpl3;Rps6;Rps3;Rpl35;Rps3a;Rpl26;Pabpc1;Eprs;Slc25a5;Hnrnpa1;Hspd1
PPI_Hub_Proteins	ARRB1	4.47857	3.79996e-05	Dgkg;Hnrnpa3;Rpl3;Hspa5;Rps8;Atp5a1;Rps3a;Dnm1;Cdc42;Adrbk1;Mapk1;Hnrnpa1;Sptan1;Hspa1a;Mapk3
PPI_Hub_Proteins	CALM3	5.5156	4.45855e-05	Grin2a;Grm5;Gap43;Rala;Dlg3;Actn2;Adrbk1;Itpr1;Atp2b4;Rin1;Camk2g;Sptbn1
PPI_Hub_Proteins	PRKCD	5.48106	4.61104e-05	Tiam1;Grm5;Gap43;Pak1;Adrbk1;Rps6;Rps3;Pebp1;Mapk1;Prkca;Lmnb2;Mapk3
PPI_Hub_Proteins	TRAF6	3.12402	7.68731e-05	Gstm3;Cyb5a;Ahcy;Hspa5;Prep;Cul1;Rps3a;Rangap1;Cs;Cdc42;Pcmt1;Glud1;Hadha;Uchl1;Ppp2r1a;Eef1d;Gnb2;Rpl35;Vps35;Hyou1;Pabpc1;Pfkp
PPI_Hub_Proteins	231403	4.06322	0.000101867	Rpl3;Dusp3;Ahcy;Got1;Prep;Rangap1;Cs;Pcmt1;Hadha;Eef1d;Mapk1;Vps35;Pabpc1;Pfkp;Aars
PPI_Hub_Proteins	EIF1B	5.44878	0.000107783	Pcmt1;Uchl1;Rpl3;Ahcy;Ppp2r1a;Rps29;Eef1d;Rpl35;Rps3a;Rpl26;Otub1
PPI_Hub_Proteins	GC20	5.23488	0.00014899	Pcmt1;Uchl1;Rpl3;Ahcy;Ppp2r1a;Rps29;Eef1d;Rpl35;Rps3a;Rpl26;Otub1
PPI_Hub_Proteins	HSP90AA1	4.38899	0.000160093	Gabarapl2;Rps6;Prkca;Rps3a;Eprs;Uchl1;Pak1;Ppp2r1a;Rps3;Mapk1;Sugt1;Hspa1a;Mapk3
PPI_Hub_Proteins	H2AFX	5.00549	0.000209373	Hspa5;Hnrnpa2b1;Pgk1;Hnrnpd;Vps35;Prkca;Hyou1;Pabpc1;Hnrnpa1;Rab11b;Hspa1a
PPI_Hub_Proteins	MAPK14	2.95318	0.000223621	Dusp3;Eprs;Rangap1;Snap91;Aimp1;Cdc42;Acly;Gja1;Pak1;Gap43;Ppp1r1a;Epb41l2;Adrbk1;Palm;Hnrnpd;Mapk1;Ncam1;Tln2;Hnrnpa1;Sptbn1;Mapk3
PPI_Hub_Proteins	HGS	5.80587	0.000352506	Acly;Pak1;Mthfd1l;Cbs;Ppp1r7;Rps3a;Pfkm;Pld3;Gfap
PPI_Hub_Proteins	NFKB2	4.65543	0.000363829	Hadhb;Hadha;Hspa5;Ppp2r1a;Rps8;Ctbp1;Rps3;Rpl13;Rps3a;Pabpc1;Eprs
PPI_Hub_Proteins	HNRNPK	4.54929	0.000424427	Gabarapl2;Acadl;Rps8;Atp5a1;Rps3;Rpl13;Rps3a;Hnrnpa1;Gfap;Hspd1;Mapk3
PPI_Hub_Proteins	PRKCZ	5.00307	0.000424427	Cdc42;Tiam1;Grm5;Ppp2r1a;Pebp1;Mapk1;Prkca;Adap1;Hnrnpa1;Mapk3
PPI_Hub_Proteins	BTK	5.51145	0.000472323	Hadha;Gng2;Actn1;Kit;Atp5a1;Rps3;Twf1;Prkca;Pfkp
PPI_Hub_Proteins	ALB	4.74123	0.000619717	Dgkg;Gabarapl2;Tiam1;Tf;Ahsg;Alb;Tln2;Apoe;Hba1;Gfap
PPI_Hub_Proteins	SGK1	5.2034	0.000684953	Cs;Grm5;Rpl3;Mapk1;Prkca;Hyou1;Rps3a;Pabpc1;Gfap
PPI_Hub_Proteins	EPB41	4.50525	0.000883708	Fkbp1a;Pcmt1;Hadha;Scp2;Pebp1;Rps3a;Dynlrb1;Sptan1;Sptbn1;Rab11b
PPI_Hub_Proteins	NEDD4	4.96536	0.000919027	Cdc42;Gabarapl2;Rala;Gnas;Mapk1;Rps3a;Eprs;Dnm1;Mapk3
PPI_Hub_Proteins	PPP2R1A	4.78292	0.00117368	Gabarapl2;Fech;Ppp2r1a;Mapk1;Prkca;Park7;Eef2;Hspd1;Mapk3
PPI_Hub_Proteins	PRKG1	5.14166	0.00161081	Pak1;Kit;Itpr1;Prkca;Syn2;Sptbn1;Dnm1;Gfap
PPI_Hub_Proteins	ACTB	3.16501	0.00162971	Gabarapl2;Actn2;Rps8;Actn1;Atp5a1;Prkca;Rps3a;Gnai2;Hspd1;Epb41l2;Hnrnpa2b1;Hnrnpd;Hnrnpa1;Sptan1
PPI_Hub_Proteins	GSK3B	2.42869	0.00164869	Marcksl1;Prkca;Ank2;Add3;Cacna1e;Tpd52l2;Dnm1;Acly;Gja1;Pak1;Grm5;Ppp1r1a;Adrbk1;Palm;Hnrnpd;Rps3;Mapk1;Ncam1;Camk2g;Sptbn1;Appl1;Mapk3
PPI_Hub_Proteins	IRS1	4.42495	0.00187895	Cand1;Ppp2r1a;Gnb2;Adrbk1;Rps3;Flot2;Mapk1;Prkca;Mapk3
PPI_Hub_Proteins	CSNK2A1	2.5813	0.00189064	Rpl5;Prnp;Marcksl1;Aqp4;L1cam;Rangap1;Epn2;Pak1;Gap43;Hsph1;Eef1d;Epb41l2;Hnrnpa2b1;Mapk1;Apoe;Hnrnpa1;Sptan1;Stx1a;Sptbn1
PPI_Hub_Proteins	MAPK8	3.04124	0.00222311	Marcksl1;Dusp3;Ctbp1;Ank2;Eef2;Tpd52l2;Dnm1;Aimp1;Cdc42;Gja1;Rac3;Mapk1;Hspa1a;Mapk3
PPI_Hub_Proteins	PRKACA	2.77949	0.00233951	Itpr1;Ank2;Syn2;Gfap;Hspd1;Acly;Grin2a;Pak1;Ppp1r1a;Ppp2r1a;Adrbk1;Hnrnpd;Capn2;Mapk1;Sptbn1;Mapk3
PPI_Hub_Proteins	SQSTM1	4.19631	0.00253199	Hadhb;Gabarapl2;Hadha;Grin2a;Ndufa5;Mapk1;Camk2g;Gria3;Mapk3
PPI_Hub_Proteins	COPS5	4.68292	0.0025364	Uchl1;Hspa5;Basp1;Epb41l2;Atp5a1;Cul1;Flot1;Hspa1a
PPI_Hub_Proteins	SRRM2	4.16937	0.00256507	Prnp;Eef1d;Hnrnpa2b1;Rps3a;Hnrnpa1;Sptbn1;Hspd1;Mapk3;Hspa1a
PPI_Hub_Proteins	IKBKB	4.09057	0.00287532	Hspa5;Ppp2r1a;Rps3;Pebp1;Prkca;Eprs;Calm2;Hspd1;Hspa1a
PPI_Hub_Proteins	SMAD2	2.88479	0.0033086	Hnrnpa3;Rps3a;Gfap;Hspd1;Pak1;Ppp2r1a;Dnaja2;Gnas;Mapk1;Rin1;Slc25a5;Camk2g;Hspa1a;Mapk3
PPI_Hub_Proteins	STAT1	4.4311	0.00336139	Dusp3;Kit;Mapk1;Sptan1;Camk2g;Sptbn1;Gfap;Mapk3
PPI_Hub_Proteins	RPS6KA3	2.8441	0.00365991	Rps6;Itpr1;Ank2;Add3;Epn2;Acly;Ppp1r1a;Epb41l2;Mapk1;Rin1;Camk2g;Pfkm;Sptbn1;Mapk3
PPI_Hub_Proteins	PRKAB1	3.4176	0.00518177	Hadha;Acly;Rpl3;Eef1d;Prep;Vps35;Pabpc1;Rangap1;Pfkp;Otub1
PPI_Hub_Proteins	AKT1	2.77987	0.0064396	Ahsg;Rps6;Ak1;Prkca;Cdc42;Acly;Pak1;Ppp1r1a;Ppp2r1a;Rps3;Hnrnpa1;Appl1;Mapk3
PPI_Hub_Proteins	BCL2	4.4428	0.00656403	Prnp;Capn2;Itpr1;Mapk1;Prkca;Mapk3;Hspa1a
PPI_Hub_Proteins	VHL	2.90096	0.00661416	Fkbp1a;Pcmt1;Acly;Uchl1;Eef1d;Hnrnpa2b1;Rpl35;Pebp1;Vps35;Hyou1;Pfdn5;Otub1
PPI_Hub_Proteins	CAMK2A	3.81481	0.00763759	Tiam1;Grin2a;Grm5;Dlg3;Actn2;Actn1;Calm2;Gfap
PPI_Hub_Proteins	INSR	3.38542	0.00881685	Ahsg;Actn1;Epb41l2;Kit;Mapk1;Prkca;Calm2;Snx6;Mapk3
PPI_Hub_Proteins	RAF1	3.66882	0.00936391	Pak1;Hspa5;Gnb2;Pebp1;Mapk1;Prkca;Hspd1;Mapk3
PPI_Hub_Proteins	NR3C1	3.26576	0.0108042	Ahsg;Epb41l2;Alb;Dnaja2;Mapk1;Hba1;Hspa1a;Hspd1;Mapk3
PPI_Hub_Proteins	PRKDC	2.80974	0.0119065	Gabarapl2;Gap43;Marcksl1;Actn1;Rps6;Itpr1;Aqp4;Sptan1;Sptbn1;Gfap;Epn2
PPI_Hub_Proteins	PRKACB	3.49058	0.0120456	Tiam1;Ppp1r1a;Kit;Itpr1;Mapk1;Camk2g;Sptbn1;Mapk3
PPI_Hub_Proteins	YWHAE	3.16967	0.0125582	Gabarapl2;Hnrnpa3;Rps8;Atp5a1;Hnrnpa2b1;Rps3;Pgk1;Rin1;Syn2
PPI_Hub_Proteins	ABL1	2.57941	0.0148279	Cntfr;Cdv3;Pak1;Cntnap1;Ahsg;Kit;Cat;Prkca;Tln2;Rin1;Sptan1;Dnm1
PPI_Hub_Proteins	PPP1CA	3.29057	0.0162815	Ppp1r1a;Ppp1r7;Cul1;Mapk1;Calm2;Camk2g;Pfkm;Mapk3
PPI_Hub_Proteins	CDK5	3.63909	0.0163638	Grin2a;Pak1;Ppp1r1a;Actn1;Eprs;Stx1a;Dnm1
PPI_Hub_Proteins	SRC	2.20166	0.020912	Cntnap1;Actn1;Atp2b4;Prkca;L1cam;Dnm1;Gfap;Cdc42;Tiam1;Gja1;Grin2a;Adrbk1;Kit;Rpl13;Sptan1
PPI_Hub_Proteins	MAPK3	2.53822	0.0224171	Gja1;Dusp3;Ppp1r1a;Ppp2r1a;Adrbk1;Rps3;Capn2;Mapk1;Prkca;Pfkm;Mapk3
PPI_Hub_Proteins	SMAD3	2.52195	0.0229895	Rpl3;Ppp2r1a;Ahsg;Dnaja2;Cul1;Mapk1;Prkca;Pabpc1;Camk2g;Sptbn1;Hspa1a
PPI_Hub_Proteins	MDM2	3.0622	0.0229895	Eef1g;Rpl5;Ctbp1;Ndufa12;Adrbk1;Gnas;Rpl26;Stx1a
PPI_Hub_Proteins	CLTC	3.79412	0.0235351	Gabarapl2;Kit;Hip1r;Ap2a2;Snap91;Epn2
PPI_Hub_Proteins	VCL	3.76093	0.0242101	Pdia3;Hadhb;Actn2;Actn1;Prkca;Tln2
PPI_Hub_Proteins	YWHAG	2.28226	0.0247362	Rpl3;Atp5a1;Prkca;Epn2;Hspd1;Eef1g;Tiam1;Pak1;Epb41l2;Alb;Pabpc1;Sptbn1;Hspa1a
PPI_Hub_Proteins	PLCG1	2.77439	0.0249674	Grin2a;Pak1;Kit;Rpl13;Prkca;Stx1a;Snap91;Dnm1;Rgs7
PPI_Hub_Proteins	CSNK2A2	2.6003	0.0251035	Prnp;Pak1;Gap43;Hsph1;Aqp4;Ank2;L1cam;Calm2;Stx1a;Mapk3
PPI_Hub_Proteins	ARF6	3.23971	0.0263548	Aimp1;Cs;Acly;Rala;Rps29;Hyou1;Pfkp
PPI_Hub_Proteins	PIK3CA	3.63377	0.0267445	Gnb2;Kit;Rac3;Adap1;Appl1;Gnai2
PPI_Hub_Proteins	MEPCE	3.19837	0.0272223	Cand1;Hspa5;Hnrnpa2b1;Hnrnpd;Rps3;Rangap1;Hnrnpa1
PPI_Hub_Proteins	ACTA1	3.19837	0.0272223	Pak1;Epb41l2;Alb;Hip1r;Prkca;Tln2;Sptan1
PPI_Hub_Proteins	ITGB1	3.51489	0.0300396	Pdia3;Vcan;Actn1;Prkca;L1cam;Hspd1
PPI_Hub_Proteins	PIK3R1	2.49154	0.0308887	Cdc42;Eef1d;Kit;Rac3;Rpl13;Pebp1;Sirpa;Scg2;Dnm1;Gnai2
PPI_Hub_Proteins	NFKB1	2.45725	0.0330713	Gabarapl2;Hspa5;Rps8;Rps3;Rac3;Slc25a5;Sptan1;Sptbn1;Pld3;Hspa1a
PPI_Hub_Proteins	FOS	3.04299	0.0330713	Eef1d;Mapk1;Prkca;Tln2;Rgs7;Mapk3;Hspa1a
PPI_Hub_Proteins	TNFRSF1A	3.04299	0.0330713	Hadha;Hspa5;Atp5a1;Rps3;Mapk1;Slc25a5;Mapk3
PPI_Hub_Proteins	NFKBIA	3.37672	0.0340736	Hspa5;Capn2;Cul1;Rps3;Slc25a5;Hnrnpa1
PPI_Hub_Proteins	FLNA	3.35038	0.0349166	Cdc42;Grm5;Rala;Pak1;Prkca;Camk2g
PPI_Hub_Proteins	MAPK1	2.21305	0.0350539	Gja1;Pak1;Dusp3;Ppp2r1a;Rps3;Capn2;Itpr1;Pebp1;Mapk1;Prkca;L1cam;Mapk3
PPI_Hub_Proteins	MAPK9	2.701	0.037288	Cdc42;Gja1;Dusp3;Rps3;Rac3;Prkca;Sptbn1;Hspa1a
PPI_Hub_Proteins	ATM	2.701	0.037288	Gap43;Marcksl1;Rps6;Alb;Cat;Ap2a2;Sptbn1;Epn2
PPI_Hub_Proteins	MAPK10	2.88517	0.0403962	Grm5;Hsph1;Dusp3;Rac3;Sptbn1;Gfap;Hspa1a

## Sheet: sheet_7
pathway	description	enrichment_ratio	fdr	features
MSigDB_Hallmark_2020	Complement	7.08967	0.011339	Gmfb;Cdh13;Lta4h;Mt3;Ctsb;Hspa1a
MSigDB_Hallmark_2020	mTORC1 Signaling	5.8099	0.0405062	Qdpr;Actr2;Acly;Prdx1;Lta4h
Aging_Perturbations_from_GEO_up	Rat hippocampus dentate gyrus 18 months vs 28 months GSE21681 aging:358	16.5629	1.32336e-13	Brsk1;Gstp1;Cisd1;Arpc4;Thy1;Mt3;Mlf2;Gfap;Qdpr;Pcp4;Capns1;Plp1;Sh3bgrl3;Apoe;Phpt1;Dbn1;Bcas1;Ctsb;Rpl19
Aging_Perturbations_from_GEO_up	Rat hippocampus CA1 18 months vs 28 months GSE21681 aging:354	14.2552	3.8602e-12	Brsk1;Maob;Gstp1;Arpc4;Thy1;Mt3;Mlf2;Gfap;Qdpr;Capns1;Camkv;Sh3bgrl3;Apoe;Phpt1;Dbn1;Bcas1;Ctsb;Rpl19
Aging_Perturbations_from_GEO_up	Rat hippocampus dentate gyrus 18 months vs 28 months GSE21681 aging:357	13.3211	7.34508e-12	Brsk1;Gstp1;Cisd1;Arpc4;Thy1;Mt3;Mlf2;Gfap;Qdpr;Pcp4;Capns1;Cdh13;Sh3bgrl3;Phpt1;Dbn1;Bcas1;Ctsb;Rpl19
Aging_Perturbations_from_GEO_up	Rat frontalcortex 4 months vs 22 months GDS3939 aging:99	16.0975	7.34508e-12	Brsk1;Maob;Mog;Adpgk;Cox4i1;Gstp1;Gfap;Qdpr;Capns1;S100a16;Prdx1;Plp1;Apoe;Bcas1;Ctsb;Rpl19
Aging_Perturbations_from_GEO_up	Rat hippocampus 7 months vs 21 months GDS4019 aging:97	13.4415	6.46522e-11	Slc44a1;Maob;Mog;Adpgk;Abhd3;Cox4i1;Gstp1;Thy1;Gfap;Qdpr;Capns1;Plp1;Sh3bgrl3;Tppp;Bcas1;Ctsb
Aging_Perturbations_from_GEO_up	Rat hippocampus CA1 18 months vs 28 months GSE21681 aging:353	13.1371	7.67611e-11	Brsk1;Gstp1;Arpc4;Thy1;Mt3;Mlf2;Gfap;Qdpr;Capns1;Sh3bgrl3;Erh;Apoe;Phpt1;Bcas1;Ctsb;Rpl19
Aging_Perturbations_from_GEO_up	Rat hippocampus CA3 18 months vs 28 months GSE21681 aging:356	9.66412	3.92932e-08	Brsk1;Maob;Cisd1;Arpc4;Thy1;Mt3;Mlf2;Gfap;Capns1;Camkv;Sh3bgrl3;Apoe;Phpt1;Ctsb
Aging_Perturbations_from_GEO_up	Rat hippocampus CA3 18 months vs 28 months GSE21681 aging:355	9.88452	9.13914e-08	Brsk1;Thy1;Mt3;Mlf2;Gfap;Pcp4;Capns1;Camkv;Sh3bgrl3;Apoe;Phpt1;Bcas1;Ctsb
Aging_Perturbations_from_GEO_up	Rat femur 12 weeks vs 32 weeks GDS509 aging:261	9.06361	1.97419e-07	Cox4i1;Pgam1;Gstp1;Gdi2;Arpc4;Mt3;Tjp1;Capns1;Prdx1;Apoe;Slc25a5;Ctsb;Rpl19
Aging_Perturbations_from_GEO_up	Rat femur 28 weeks vs 54 weeks GDS509 aging:271	8.6895	2.72805e-07	Pgam1;Gdi2;Arpc4;Hmgb1;Thy1;Rpl9;Prdx1;Apoe;Slc25a5;Dbn1;Ctsb;Plec;Rpl19
Aging_Perturbations_from_GEO_up	Rat diaphysealfemoralcallus 26 weeks vs 52 weeks GDS1995 aging:117	7.43637	1.22274e-06	Pgam1;Gstp1;Arpc4;Rpl9;Tjp1;Capns1;Prdx1;Flot2;Lta4h;Apoe;Ctsb;Plec;Rpl19
Aging_Perturbations_from_GEO_up	Rat femur 12 weeks vs 58 weeks GDS509 aging:267	7.36648	1.30369e-06	Pgam1;Gdi2;Arpc4;Thy1;Rpl9;Mt3;Tjp1;Capns1;Prdx1;Apoe;Slc25a5;Ctsb;Rpl19
Aging_Perturbations_from_GEO_up	Rat femur 7 weeks vs 53 weeks GDS509 aging:264	7.77095	1.92342e-06	Vcan;Capns1;Pgam1;Prdx1;Gdi2;Arpc4;Thy1;Apoe;Dbn1;Ctsb;Plec;Rpl19
Aging_Perturbations_from_GEO_up	Rat hippocampus 5 months vs 24 months GSE14505 aging:346	7.01115	5.2674e-06	Qdpr;Slc44a1;Maob;Adpgk;Anxa3;Anxa4;Gstp1;Gstt3;Cdh13;Fah;Bcas1;Gfap
Aging_Perturbations_from_GEO_up	Rat hippocampus 7 months vs 21 months GDS4019 aging:98	8.67444	6.37665e-06	Qdpr;Acly;Anxa3;Gstp1;Plp1;Sh3bgrl3;Thy1;Lta4h;Ctsb;Gfap
Aging_Perturbations_from_GEO_up	Rat femur 6 weeks vs 26 weeks GDS509 aging:257	7.58864	6.52767e-06	Acly;Vcan;Cox4i1;Pgam1;Gstp1;Prdx1;Gdi2;Flot2;Slc25a5;Rpl9;Rpl19
Aging_Perturbations_from_GEO_up	Rat femur 27 weeks vs 53 weeks GDS509 aging:270	6.79639	1.55704e-05	Pgam1;Prdx1;Gdi2;Arpc4;Thy1;Rpl9;Hapln1;Dbn1;Ctsb;Plec;Rpl19
Aging_Perturbations_from_GEO_up	Rat femur 30 weeks vs 56 weeks GDS509 aging:272	5.95329	4.49758e-05	Tjp1;Capns1;Pgam1;Gdi2;Arpc4;Hmgb1;Rpl9;Mt3;Ctsb;Plec;Rpl19
Aging_Perturbations_from_GEO_up	Rat femur 10 weeks vs 56 weeks GDS509 aging:266	6.36951	6.17118e-05	Tjp1;Pgam1;Gstp1;Gdi2;Apoe;Slc25a5;Mt3;Ctsb;Plec;Rpl19
Aging_Perturbations_from_GEO_up	Rat femur 8 weeks vs 54 weeks GDS509 aging:265	6.28387	6.75014e-05	Pgam1;Csde1;Prdx1;Gdi2;Thy1;Apoe;Rpl9;Ctsb;Plec;Rpl19
Aging_Perturbations_from_GEO_up	Rat thoracicaorta 3 months vs 15 months GDS3077 aging:120	5.82206	0.000277783	Tjp1;Capns1;Cox4i1;Csde1;Gstp1;Prdx1;Rpl9;Ctsb;Rpl19
Aging_Perturbations_from_GEO_up	Rat whiteadipose 4 months vs 28 months GDS3102 aging:126	6.53413	0.000307087	Tjp1;Actr2;Gstp1;Apoe;Slc25a5;Rpl9;Ctsb;Rpl19
Aging_Perturbations_from_GEO_up	Rat thoracicaorta 6 months vs 15 months GDS3077 aging:122	6.44269	0.000325014	Capns1;Csde1;Gstp1;Prdx1;Flot2;Rpl9;Ctsb;Rpl19
Aging_Perturbations_from_GEO_up	Rat femur 7 weeks vs 27 weeks GDS509 aging:258	6.37575	0.000342203	Vcan;Capns1;Thy1;Apoe;Dbn1;Ctsb;Plec;Rpl19
Aging_Perturbations_from_GEO_up	Rat thoracicaorta 3 months vs 6 months GDS3077 aging:119	5.39845	0.000423775	Qdpr;Tjp1;Acly;Cox4i1;Pgam1;Gstp1;Prdx1;Slc25a5;Rpl9
Aging_Perturbations_from_GEO_up	Rat liver 6 months vs 18 months GSE11097 aging:197	5.98168	0.000479512	Actr2;Maob;Arpc3;Pgam1;Gstt3;Ctsb;Mlf2;Rpl19
Aging_Perturbations_from_GEO_up	Rat liver 12 months vs 24 months GSE11097 aging:195	5.68525	0.000648603	Qdpr;Acly;Maob;Cox4i1;Slc25a5;Fah;Suox;Ctsb
Aging_Perturbations_from_GEO_up	Rat liver 6 months vs 11 months GSE11097 aging:196	5.51423	0.000779438	Qdpr;Acly;Maob;Pgam1;Cisd1;Gstt3;Apoe;Rpl19
Aging_Perturbations_from_GEO_up	Rat femur 6 weeks vs 26 weeks GDS509 aging:256	7.60388	0.000849354	Capns1;Cox4i1;Csde1;Flot2;Apoe;Ctsb
Aging_Perturbations_from_GEO_up	Rat thoracicaorta 6 months vs 28 months GDS3077 aging:123	6.15142	0.000910311	Capns1;Csde1;Gstp1;Rpl9;Ctsb;Rpl19;Hspa1a
Aging_Perturbations_from_GEO_up	Rat femur 32 weeks vs 58 weeks GDS509 aging:273	4.68867	0.00094749	Capns1;Prdx1;Gdi2;Flot2;Arpc4;Thy1;Apoe;Rpl9;Ctsb
Aging_Perturbations_from_GEO_up	Rat diaphysealfemoralcallus 6 weeks vs 52 weeks GDS1995 aging:116	5.01527	0.00125876	Tjp1;Capns1;Csde1;Arpc4;Apoe;Rpl9;Ctsb;Plec
Aging_Perturbations_from_GEO_up	Rat femur 6 weeks vs 52 weeks GDS509 aging:263	4.96076	0.00133134	Pgam1;Csde1;Gstp1;Prdx1;Gdi2;Rpl9;Ctsb;Rpl19
Aging_Perturbations_from_GEO_up	Rat femur 6 weeks vs 52 weeks GDS509 aging:262	5.04103	0.00240346	Cox4i1;Pgam1;Csde1;Gstp1;Arpc4;Lta4h;Ctsb
Aging_Perturbations_from_GEO_up	Rat liver 6 months vs 24 months GSE11097 aging:198	4.88578	0.00270074	Acly;Gstp1;Lta4h;Slc25a5;Rpl9;Ctsb;Rpl19
Aging_Perturbations_from_GEO_up	Rat femur 26 weeks vs 52 weeks GDS509 aging:268	4.20408	0.00307977	Spr;Pgam1;Arpc4;Lta4h;Slc25a5;Rpl9;Ctsb;Rpl19
Aging_Perturbations_from_GEO_up	Rat diaphysealfemoralcallus 6 weeks vs 26 weeks GDS1995 aging:115	4.98089	0.00502486	Capns1;Csde1;Arpc4;Apoe;Rpl9;Plec
Aging_Perturbations_from_GEO_up	Rat posteriorcricoarytenoid 6 months vs 30 months GDS1278 aging:74	4.75291	0.00610813	Anxa4;Csde1;Gstp1;Apoe;Slc25a5;Rpl19
Aging_Perturbations_from_GEO_up	Rat femur 26 weeks vs 52 weeks GDS509 aging:269	4.20386	0.0100138	Csde1;Gdi2;Apoe;Ctsb;Plec;Rpl19
Aging_Perturbations_from_GEO_up	Rat femur 10 weeks vs 30 weeks GDS509 aging:260	4.89551	0.0109473	Pgam1;Gstp1;Apoe;Slc25a5;Mt3
Aging_Perturbations_from_GEO_up	Rat hippocampus CA3 region 6 months vs 25 months GSE14724 aging:347	4.02737	0.0120004	Qdpr;S100a16;Anxa4;Gstp1;Bcas1;Gfap
Aging_Perturbations_from_GEO_up	Rat myocardium 18 weeks vs 22 weeks GDS4025 aging:142	4.72972	0.0123576	Capns1;Cox4i1;Arpc4;Ctsb;Plec
Aging_Perturbations_from_GEO_up	Rat femur 8 weeks vs 28 weeks GDS509 aging:259	3.95612	0.0126819	Cox4i1;Csde1;Prdx1;Apoe;Rpl9;Rpl19
Aging_Perturbations_from_GEO_up	Rat ventricle 4 months vs 21 months GDS399 aging:112	4.65092	0.0127592	Tjp1;Prdx1;Apoe;Rpl9;Ctsb
Aging_Perturbations_from_GEO_up	Rat heart 4 months vs 28 months GDS3102 aging:125	3.82096	0.0264984	Gstp1;Apoe;Rpl9;Ctsb;Rpl19
Aging_Perturbations_from_GEO_up	Rat thoracicaorta 3 months vs 28 months GDS3077 aging:121	3.5518	0.0333149	Tjp1;Gstp1;Rpl9;Ctsb;Rpl19
Aging_Perturbations_from_GEO_up	Rat liver 18 months vs 24 months GSE11097 aging:201	3.48475	0.0355048	Acly;Csde1;Gstp1;Lta4h;Rpl19
Aging_Perturbations_from_GEO_up	Rat entorhinal cortex 5 months vs 24 months GSE14505 aging:345	3.46295	0.0360628	Qdpr;Adpgk;Ncan;Fah;Gfap
Aging_Perturbations_from_GEO_up	Rat extensordigitorumlongusmuscles 6 months vs 30 months GDS1279 aging:70	3.39914	0.0380553	Capns1;Apoe;Rpl9;Ctsb;Rpl19
Aging_Perturbations_from_GEO_up	Rat extraocularmuscles 6 months vs 30 months GDS1279 aging:72	3.35787	0.0392139	Acly;Pc;Csde1;Gstp1;Apoe
Aging_Perturbations_from_GEO_up	Rat liver 4 months vs 24 months GSE11097 aging:191	3.26851	0.0417272	Acly;Apoe;Slc25a5;Rpl9;Rpl19
Aging_Perturbations_from_GEO_down	Rat hippocampus CA1 18 months vs 28 months GSE21681 aging:354	8.92378	4.64464e-05	Actr2;Pcp4;Cox4i1;Pgam1;Plp1;Tppp;Snrpc;Rpl9;Pgm2l1
Aging_Perturbations_from_GEO_down	Rat hippocampus CA3 18 months vs 28 months GSE21681 aging:356	8.72337	0.000137745	Actr2;Mog;Pgam1;Plp1;Tppp;Slc25a5;Snrpc;Pgm2l1
Aging_Perturbations_from_GEO_down	Rat hippocampus dentate gyrus 18 months vs 28 months GSE21681 aging:357	8.64209	0.000137745	Actr2;Arpc3;Cox4i1;Pgam1;Tppp;Slc25a5;Rpl9;Pgm2l1
Aging_Perturbations_from_GEO_down	Rat thoracicaorta 3 months vs 15 months GDS3077 aging:120	8.5623	0.000137745	Acly;Pc;Pgam1;Lta4h;Apoe;Slc25a5;Pfkp;Hspa1a
Aging_Perturbations_from_GEO_down	Rat thoracicaorta 15 months vs 28 months GDS3077 aging:124	7.01598	0.000178436	Acly;Pc;Capns1;Pgam1;Prdx1;Slc25a5;Rpl9;Rpl19;Hspa1a
Aging_Perturbations_from_GEO_down	Rat hippocampus CA1 18 months vs 28 months GSE21681 aging:353	7.1414	0.000350351	Actr2;Pcp4;Pgam1;Plp1;Tppp;Slc25a5;Snrpc;Pgm2l1
Aging_Perturbations_from_GEO_down	Rat whiteadipose 4 months vs 28 months GDS3102 aging:126	6.26718	0.00070793	Acly;Pc;Capns1;Cox4i1;Pgam1;Prdx1;Cisd1;Fah
Aging_Perturbations_from_GEO_down	Rat frontalcortex 4 months vs 22 months GDS3939 aging:99	5.84834	0.000991849	Actr2;Arpc3;Chordc1;Slc25a5;Mt3;Pgm2l1;Gspt1;Pfkp
Aging_Perturbations_from_GEO_down	Rat thoracicaorta 6 months vs 15 months GDS3077 aging:122	5.47521	0.00277597	Acly;Pc;Cox4i1;Pgam1;Apoe;Slc25a5;Pfkp
Aging_Perturbations_from_GEO_down	Rat femur 6 weeks vs 52 weeks GDS509 aging:263	6.51284	0.00277597	Capns1;Arpc4;Thy1;Apoe;Slc25a5;Mt3
Aging_Perturbations_from_GEO_down	Rat liver 11 months vs 18 months GSE11097 aging:199	5.24064	0.00316295	Qdpr;Acly;Cisd1;Gstt3;Apoe;Fah;Rpl19
Aging_Perturbations_from_GEO_down	Rat femur 6 weeks vs 26 weeks GDS509 aging:257	5.89131	0.00394499	Capns1;Arpc4;Thy1;Apoe;Mt3;Ctsb
Aging_Perturbations_from_GEO_down	Rat extraocularmuscles 6 months vs 30 months GDS1279 aging:72	5.39846	0.00568527	Capns1;Pgam1;Rpl9;Ctsb;Rpl19;Hspa1a
Aging_Perturbations_from_GEO_down	Rat myocardium 18 weeks vs 22 weeks GDS4025 aging:142	4.6153	0.00568527	Csde1;Prdx1;Cisd1;Erh;Slc25a5;Rpl9;Rpl19
Aging_Perturbations_from_GEO_down	Rat hippocampus CA3 18 months vs 28 months GSE21681 aging:355	5.37702	0.00569007	Mog;Pgam1;Plp1;Slc25a5;Snrpc;Pgm2l1
Aging_Perturbations_from_GEO_down	Rat hippocampus dentate gyrus 18 months vs 28 months GSE21681 aging:358	5.13222	0.00703316	Actr2;Cox4i1;Pgam1;Tppp;Slc25a5;Pgm2l1
Aging_Perturbations_from_GEO_down	Rat thoracicaorta 3 months vs 28 months GDS3077 aging:121	5.03659	0.00758384	Acly;Pc;Cox4i1;Pgam1;Slc25a5;Hspa1a
Aging_Perturbations_from_GEO_down	Rat thoracicaorta 6 months vs 28 months GDS3077 aging:123	4.21705	0.0159101	Acly;Pc;Cox4i1;Pgam1;Prdx1;Slc25a5
Aging_Perturbations_from_GEO_down	Rat femur 30 weeks vs 56 weeks GDS509 aging:272	6.37234	0.0169254	Cox4i1;Flot2;Apoe;Slc25a5
Aging_Perturbations_from_GEO_down	Rat ventricle 4 months vs 21 months GDS399 aging:112	3.94448	0.0204361	Capns1;Cox4i1;Pgam1;Flot2;Slc25a5;Rpl19
Aging_Perturbations_from_GEO_down	Rat femur 26 weeks vs 52 weeks GDS509 aging:269	4.27638	0.0267535	Vcan;Cox4i1;Lta4h;Slc25a5;Rpl9
Aging_Perturbations_from_GEO_down	Rat femur 6 weeks vs 52 weeks GDS509 aging:262	4.2117	0.0280559	Gdi2;Thy1;Mt3;Plec;Rpl19
Aging_Perturbations_from_GEO_down	Rat liver 4 months vs 12 months GSE11097 aging:192	4.11821	0.0298938	Qdpr;Cox4i1;Pgam1;Cisd1;Suox
Aging_Perturbations_from_GEO_down	Rat liver 11 months vs 24 months GSE11097 aging:200	4.10303	0.0299638	Qdpr;Maob;Cisd1;Gstt3;Fah
Aging_Perturbations_from_GEO_down	Rat posteriorcricoarytenoid 6 months vs 30 months GDS1278 aging:74	3.74365	0.0385405	Cox4i1;Prdx1;Chordc1;Rpl9;Hspa1a
Aging_Perturbations_from_GEO_down	Rat hippocampus 7 months vs 21 months GDS4019 aging:98	3.64524	0.0417502	Brsk1;Pcp4;Camkv;Arpc3;Mt3
Aging_Perturbations_from_GEO_down	Rat diaphysealfemoralcallus 6 weeks vs 26 weeks GDS1995 aging:115	3.58628	0.0439429	Cox4i1;Hmgb1;Lta4h;Mt3;Rpl19
Aging_Perturbations_from_GEO_down	Rat femur 7 weeks vs 53 weeks GDS509 aging:264	4.32609	0.0446383	Cox4i1;Slc25a5;Rpl9;Mt3
PPI_Hub_Proteins	YWHAB	8.56375	3.52947e-11	Cntfr;Actr2;Mog;Ncan;Thy1;Hapln1;Tjp1;Sept9;Acly;Vcan;Cacnb3;Nfasc;Pc;Camkv;Bdh1;Dpysl5;Plp1;Flot2;Cspg5;Slc25a5;Dbn1;Pfkp;Plec;Hspa1a
PPI_Hub_Proteins	SLC2A4	6.56033	3.08579e-06	Vars;Map1s;Cox4i1;Gstp1;Rpl9;Sept9;Acly;Capns1;Prdx1;Dpysl3;Cdh13;Slc25a5;Dbn1;Ctsb;Plec;Rpl19
PPI_Hub_Proteins	PRKAB1	11.2762	5.46494e-06	Cbr1;Acly;Csde1;Mars;Gdi2;Cisd1;Erh;Gspt1;Pfkp;Camkk2
PPI_Hub_Proteins	GABARAPL2	6.62667	8.58468e-06	Cbr1;Pdcd6ip;Gstp1;Rpl9;Gspt1;Gfap;Prdx1;Mars;Tubb1;Slc25a5;Snrpc;Pfkp;Rpl19;Hspa1a
PPI_Hub_Proteins	GABARAPL1	6.57618	1.9143e-05	Pdcd6ip;Anxa4;Gstp1;Rpl9;Gfap;S100a16;Prdx1;Tubb1;Slc25a5;Snrpc;Plec;Rpl19;Hspa1a
PPI_Hub_Proteins	MAP1LC3A	7.13182	5.11833e-05	Pdcd6ip;Map1s;Gstp1;Prdx1;Mars;Tubb1;Erh;Slc25a5;Snrpc;Gfap;Hspa1a
PPI_Hub_Proteins	MAP1LC3B	7.65947	6.78606e-05	Vars;Map1s;Gstp1;Prdx1;Tubb1;Slc25a5;Snrpc;Plec;Gfap;Hspa1a
PPI_Hub_Proteins	GRIN2B	8.89054	0.000188141	Tjp1;Mog;Arpc3;Prdx1;Plp1;Arpc4;Slc25a5;Dbn1
PPI_Hub_Proteins	TRAF6	5.40056	0.000188141	Sept9;Cbr1;Actr2;Gmfb;Vars;Csde1;Mars;Gdi2;Erh;Phpt1;Gspt1;Pfkp
PPI_Hub_Proteins	DLG4	5.96277	0.000386227	Aldh5a1;Mog;Gstp1;Prdx1;Plp1;Arpc4;Slc25a5;Fah;Pgm2l1;Pfkp
PPI_Hub_Proteins	MCC	6.58082	0.00114229	Cbr1;Pdcd6ip;Vars;Csde1;Mars;Lta4h;Gspt1;Pfkp
PPI_Hub_Proteins	GABARAP	5.05461	0.00122128	Pdcd6ip;Gstp1;Prdx1;Tubb1;Slc25a5;Snrpc;Rpl9;Rpl19;Gfap;Hspa1a
PPI_Hub_Proteins	GRB2	3.80523	0.00323324	Cntfr;Cbr1;Actr2;Nfasc;Gmfb;Pdcd6ip;Arpc3;Gstp1;Prdx1;Arpc4;Dbn1;Plec
PPI_Hub_Proteins	EGFR	4.60488	0.00443941	Tjp1;Cbr1;Pdcd6ip;Gstp1;Prdx1;Sh3bgrl3;Slc25a5;Fah;Hspa1a
PPI_Hub_Proteins	231403	5.7521	0.005105	Cbr1;Actr2;Pdcd6ip;Mars;Lta4h;Gspt1;Pfkp
PPI_Hub_Proteins	YWHAZ	4.2881	0.00637952	Arhgap21;Vars;Spr;Pgam1;Prdx1;Tubb1;Pfkp;Rpl19;Hspa1a
PPI_Hub_Proteins	EIF1B	7.372	0.00982746	Cbr1;Actr2;Gdi2;Erh;Arpc4
PPI_Hub_Proteins	CDK1	3.61889	0.00982746	Tjp1;Acly;Map1s;Anxa4;Prdx1;Gdi2;Hmgb1;Dbn1;Plec;Gfap
PPI_Hub_Proteins	APP	5.69343	0.00982746	Nfasc;Pgam1;Htra2;Thy1;Apoe;Gfap
PPI_Hub_Proteins	MAPK14	3.86707	0.00982746	Tjp1;Acly;Gmfb;Slc44a1;Gstp1;Mars;Htra2;Bcas1;Camkk2
PPI_Hub_Proteins	GC20	7.09339	0.00982746	Cbr1;Actr2;Gdi2;Erh;Arpc4
PPI_Hub_Proteins	IKBKE	4.15588	0.0110367	Cbr1;Acly;Gmfb;Pdcd6ip;Cox4i1;Lta4h;Gspt1;Hspa1a
PPI_Hub_Proteins	IL7R	7.31153	0.0254668	Capns1;Gstp1;Tubb1;Hspa1a
PPI_Hub_Proteins	SGK1	6.86225	0.030393	Vars;Gdi2;Camkk2;Gfap
PPI_Hub_Proteins	PRKCA	3.42239	0.0308423	Tjp1;Nfasc;Gmfb;Gstp1;Hmgb1;Dbn1;Gfap;Hspa1a
PPI_Hub_Proteins	SNCA	4.24368	0.0325468	Cntfr;Brsk1;Thy1;Tppp;Bcas1;Hspa1a
PPI_Hub_Proteins	IKBKG	4.19075	0.0332371	Sept9;Vars;Mars;Slc25a5;Dbn1;Hspa1a
PPI_Hub_Proteins	ACTG1	4.68999	0.0414577	Tjp1;Arpc3;Anxa4;Arpc4;Dbn1
PPI_Hub_Proteins	ESR1	3.15691	0.0420929	Actr2;Hmgb1;Slc25a5;Rpl9;Dbn1;Plec;Rpl19;Hspa1a
PPI_Hub_Proteins	CAMK2A	5.75524	0.0443013	Qdpr;Pdcd6ip;Spr;Gfap
PPI_Hub_Proteins	ARF6	5.6458	0.0457341	Acly;Gdi2;Gspt1;Pfkp
PPI_Hub_Proteins	SRRM2	5.5404	0.0471974	Sept9;Snrpc;Plec;Hspa1a

## Sheet: sheet_8
pathway	description	enrichment_ratio	fdr	features
MSigDB_Hallmark_2020	Oxidative Phosphorylation	8.61064	6.54414e-16	Ndufb6;Cox4i1;Dlst;Timm10;Etfb;Hsd17b10;Acat1;Opa1;Hspa9;Cyb5a;Atp6v1g1;Mdh1;Ndufa5;Mdh2;Ndufa4;Idh2;Sdha;Atp1b1;Lrpprc;Cox6b1;Pdp1;Afg3l2;Aldh6a1;Ndufs8;Uqcrc1;Vdac3;Ndufs3;Ndufs2;Suclg1;Aco2;Slc25a4
MSigDB_Hallmark_2020	Fatty Acid Metabolism	4.74669	3.95703e-05	Hsp90aa1;Mdh1;Mdh2;Dlst;Gad2;Sdha;Hsd17b10;Acat2;Auh;Sms;Suclg1;Aco2;Glul;Hibch;Mgll
MSigDB_Hallmark_2020	Myc Targets V1	4.2147	3.95703e-05	Rplp0;Rps6;Nap1l1;Rad23b;Nme1;Hspd1;Psmb2;Vdac3;Hnrnpd;Pgk1;Psmd1;Hprt1;Pabpc1;Rps2;Hnrnpa1;Cct5;Eif3b
MSigDB_Hallmark_2020	mTORC1 Signaling	3.66112	0.000504309	Hspa9;Got1;Psmd13;Hspa4;Arpc5l;Atp2a2;Glrx;Eno1;Tuba4a;Hspd1;Qdpr;Serpinh1;Pgk1;Phgdh;Hprt1
MSigDB_Hallmark_2020	PI3K/AKT/mTOR Signaling	4.72011	0.00107265	Tiam1;Arf1;Ralb;Arpc3;Ywhab;Prkar2a;Cfl1;Them4;Grb2;Ptpn11
MSigDB_Hallmark_2020	Adipogenesis	3.3906	0.00107265	Rtn3;Ndufa5;Mdh2;Etfb;Fah;Gphn;Qdpr;Uqcrc1;Ndufs3;Suclg1;Aco2;Tkt;Mgll;Hibch
MSigDB_Hallmark_2020	Glycolysis	3.3906	0.00107265	Tsta3;Cyb5a;Mdh1;Got1;Mdh2;Pgam1;Hdlbp;Glrx;Eno1;Vcan;Pgk1;Agrn;Aldh7a1;Ppfia4
MSigDB_Hallmark_2020	Protein Secretion	4.62996	0.00167002	Rab2a;Arf1;Snx2;Rab14;Ap2s1;Clta;Ocrl;Ap2b1;Napg
MSigDB_Hallmark_2020	Mitotic Spindle	2.87715	0.00832688	Tiam1;Cttn;Kif3b;Capzb;Epb41l2;Abi1;Actn4;Sptan1;Dynll2;Lrpprc;Tuba4a;Pafah1b1
MSigDB_Hallmark_2020	Myogenesis	2.8617	0.00832688	Gnao1;Camk2b;Tpm3;Cdh13;Ncam1;Agrn;Sptan1;Clu;Ppfia4;Pfkm;Sirt2;Cnn3
Aging_Perturbations_from_GEO_up	Rat thoracicaorta 3 months vs 6 months GDS3077 aging:119	8.2258	7.49757e-28	Vps29;Rpl30;Arf1;Cox4i1;Dbi;Rpl8;Rpl9;Clu;Auh;Tmsb4x;Rpl35;Rplp2;Tmsb10;Rps9;Hsp90aa1;Rps7;Rps8;Pgam1;Rps6;Tpm1;Rpsa;Sdha;Atp5f1;Eef1a1;Rpl27;Suclg1;Rpl26;Aldh7a1;Mgll;Ndufb6;Loc100363469;Acat1;Cnn3;Hspd1;Psmb2;Pgk1;Rpl15;Rps2;Rps27a;Cyb5a;Mdh1;Ndufa5;St13;Mdh2;Ndufa4;Sod2;Gnb2l1;Tjp1;Qdpr;H1f0;Hnrnpk;Naca;Hnrnpf;Psmc1;Rpl27a;Cpe;Gstm5
Aging_Perturbations_from_GEO_up	Rat hippocampus CA3 18 months vs 28 months GSE21681 aging:356	7.27209	3.04349e-22	Ywhab;Rplp0;Cisd1;Eno1;Icam5;Clu;Ptms;Camkv;Basp1;Tmsb4x;Cfl1;Ckmt1b;Rpl35;Bsn;Sptan1;Gripap1;Mink1;Dynll1;Hpcal4;Sirt2;Tuba4a;Mlf2;Stx1b;Bcan;Ddx39b;Map1a;Eef1a2;Uqcrc1;Ndufs2;Rpl27;Rpl26;Phpt1;Shank3;Camk2b;Hpca;Camkk1;Rgd1307929;Pcsk1n;Ap2s1;Got1;Hspa4;Ap2b1;Coro2b;Mt3;Gnb2l1;Gfap;Ociad1;Aco2;Sfxn5
Aging_Perturbations_from_GEO_up	Rat hippocampus dentate gyrus 18 months vs 28 months GSE21681 aging:358	7.49127	1.15206e-20	Camk2b;Rplp0;Rogdi;Hpca;Cisd1;Icam5;Clu;Camkk1;Ptms;Pcsk1n;Basp1;Tmsb4x;Cfl1;Ckmt1b;Rpl35;Bsn;Gripap1;Slc6a17;Got1;Mink1;Atp1b1;Coro2b;Mt3;Sirt2;Tuba4a;Mlf2;Gfap;Qdpr;Stx1b;Ddx39b;Map1a;Ppp1r1b;Eef1a2;Uqcrc1;Ociad1;Rpl27;Rps20;Stub1;Rpl26;Srsf5;Aco2;Phpt1;Shank3;Dbn1
Aging_Perturbations_from_GEO_up	Rat hippocampus CA1 18 months vs 28 months GSE21681 aging:354	6.67926	1.1949e-18	Camk2b;Rplp0;Hpca;Rasgrf1;Slc3a2;Eno1;Icam5;Clu;Ptms;Pcsk1n;Camkv;Basp1;Tmsb4x;Cfl1;Ckmt1b;Rpl35;Bsn;Glul;Got1;Hspa4;Mink1;Ap2b1;Dynll1;Atp1b1;Coro2b;Mt3;Sirt2;Mlf2;Gfap;Qdpr;Map1a;Uqcrc1;Ndufs2;Rpl27;Stub1;Aco2;Nptxr;Phpt1;Shank3;Ina;Sfxn5;Dbn1;Gstm5
Aging_Perturbations_from_GEO_up	Rat frontalcortex 4 months vs 22 months GDS3939 aging:99	7.69519	1.77954e-18	Dync1i2;Napb;Rpl30;Rtn1;Rnf14;Cox4i1;Rplp0;Hpca;Rpl8;Ndrg1;Camkk1;Pcsk1n;Dpysl2;Tmsb4x;Rpl35;Mbp;Rpl15;Rps27a;Glul;Nefh;Mdh1;Mog;Rps7;Rps8;Rps6;Rpsa;Ptpn11;Ermn;Gfap;Eef1a1;Qdpr;Rpl27a;Vdac3;Ociad1;Rpl27;Rps20;Rpl26;Mapt
Aging_Perturbations_from_GEO_up	Rat femur 7 weeks vs 53 weeks GDS509 aging:264	5.95354	4.26305e-17	Camk2b;Arf1;Psmd11;Loc100363469;Ywhab;Rplp0;Hdlbp;Twf1;Slc3a2;Eno1;Rpl8;Clu;Cnn3;Acan;Basp1;Tmsb4x;Serpinh1;Ap2s1;Rpl35;Rplp2;Rpl15;Rps2;Rps27a;Tmsb10;Hsp90aa1;Tpm3;Pgam1;Nme2;Rpsa;Dynll1;Paics;Tuba4a;Eef1a1;Vcan;Hnrnpk;Psmc1;Rpl27a;Rpl27;Rpl26;Arf5;Dbn1;Eif3b;Plec
Aging_Perturbations_from_GEO_up	Rat extensordigitorumlongusmuscles 6 months vs 30 months GDS1279 aging:70	6.44233	4.67582e-17	Camk2b;Vps29;Psmd11;Loc100363469;Rplp0;Eno1;Rpl9;Clu;Tmsb4x;Ap2s1;Rpl35;Rplp2;Ncam1;Rpl15;Rps27a;Tmsb10;Rps9;Hsp90aa1;Rps8;Hspa4;Rps6;Tpm1;Rpsa;Dynll1;Sdha;Atp5f1;Gnb2l1;Fkbp1a;Eef1a1;H1f0;Hnrnpk;Hgs;Naca;Psmc1;Map1a;Eef1a2;Rpl27;Rpl26;Arf5;Eif3b
Aging_Perturbations_from_GEO_up	Rat hippocampus CA3 18 months vs 28 months GSE21681 aging:355	6.18094	3.63964e-16	Camk2b;Rplp0;Hpca;Eno1;Icam5;Clu;Camkk1;Rgd1307929;Pcsk1n;Camkv;Tmsb4x;Cfl1;Rpl35;Bsn;Glul;Sptan1;Slc6a17;Got1;Mdh2;Hspa4;Fn3krp;Dynll1;Hpcal4;Coro2b;Mt3;Sirt2;Tuba4a;Mlf2;Gfap;Ddx39b;Map1a;Uqcrc1;Ndufs2;Rpl27;Srsf5;Aco2;Phpt1;Shank3;Sfxn5
Aging_Perturbations_from_GEO_up	Rat femur 6 weeks vs 52 weeks GDS509 aging:263	5.71571	6.94912e-16	Psmd11;Loc100363469;Psmd13;Hdlbp;Dbi;Rpl9;Clu;Hspd1;Atic;Psmb2;Tmsb4x;Serpinh1;Pgk1;Psmd1;Rpl35;Rpl15;Rps2;Glul;Hspa9;Hsp90aa1;Rps7;Ndufa5;Ndufa4;Pgam1;Rps6;Nme2;Atp5f1;Sod2;Paics;Tuba4a;Nme1;Fkbp1a;Eef1a1;Hnrnpf;Psmc1;Ncl;Eef1a2;Rpl27;Rpl26;Hprt1;Aldh7a1
Aging_Perturbations_from_GEO_up	Rat femur 12 weeks vs 58 weeks GDS509 aging:267	5.21465	1.19045e-15	Rpl30;Arf1;Psmd11;Loc100363469;Ywhab;Rplp0;Hdlbp;Clta;Slc3a2;Eno1;Rpl9;Clu;Ptms;Cnn3;Acan;Tmsb4x;Serpinh1;Ap2s1;Rpl35;Rpl15;Rps2;Tmsb10;Glul;Rps9;Rps7;Mdh2;Pgam1;Nme2;Actn4;Dynll1;Sdha;Atp5f1;Paics;Mt3;Sirt2;Gnb2l1;Tjp1;Fkbp1a;Dlg4;Rpl27a;Eef1a2;Cpe;Aco1;Rpl26
Aging_Perturbations_from_GEO_up	Rat femur 26 weeks vs 52 weeks GDS509 aging:268	5.20151	1.25042e-15	Vps29;Arf1;Psmd11;Ndufb6;Loc100363469;Ywhab;Rplp0;Eno1;Rpl8;Rpl9;Clu;Add1;Hspd1;Auh;Tmsb4x;Cfl1;Rpl35;Rplp2;Rpl15;Rps2;Rps27a;Tmsb10;Cyb5a;Rps9;Hsp90aa1;Rps7;Tpm3;Rps8;Pgam1;Rps6;Nme2;Rpsa;Paics;Tuba4a;Gnb2l1;Eef1a1;Hnrnpk;Hnrnpf;Rpl27a;Rpl27;Hprt1;Rpl26;Srsf5;Tkt
Aging_Perturbations_from_GEO_up	Rat femur 30 weeks vs 56 weeks GDS509 aging:272	5.12397	1.9816e-15	Vps29;Rpl30;Arf1;Ywhab;Rplp0;Clta;Eno1;Hmgb1;Rpl9;Cnn3;Atp5b;Acan;Auh;Tmsb4x;Cfl1;Pgk1;Rpl35;Rpl15;Rps2;Tmsb10;Glul;Rps9;Rps7;Pgam1;Rpsa;Dynll1;Sdha;Atp5f1;Paics;Mt3;Sirt2;Gnb2l1;Tjp1;H1f0;Hnrnpk;Ddx39b;Naca;Rpl27a;Rpl27;Srsf5;Agrn;Arf5;Eif3b;Plec
Aging_Perturbations_from_GEO_up	Rat femur 6 weeks vs 26 weeks GDS509 aging:257	5.75206	2.56134e-15	Ahcy;Psmd11;Loc100363469;Psmd13;Cox4i1;Rplp0;Hdlbp;Dbi;Rpl9;Clu;Hspd1;Psmb2;Serpinh1;Psmd1;Rpl35;Rplp2;Rpl15;Rps2;Rps27a;Hsp90aa1;Mdh1;Rps7;Ndufa5;Ndufa4;Pgam1;Nme2;Atp5f1;Sod2;Paics;Tuba4a;Nme1;Fkbp1a;Vcan;Hnrnpf;Psmc1;Ncl;Rpl26;Aldh7a1;Slc25a4
Aging_Perturbations_from_GEO_up	Rat femur 27 weeks vs 53 weeks GDS509 aging:270	5.42484	2.81897e-15	Arf1;Psmd11;Ywhab;Rplp0;Hdlbp;Clta;Twf1;Slc3a2;Eno1;Rpl8;Rpl9;Clu;Hapln1;Ptms;Cnn3;Acan;Basp1;Tmsb4x;Serpinh1;Ap2s1;Rpl35;Rpl15;Rps2;Rps27a;Tmsb10;Rps7;Tpm3;Pgam1;Nme2;Rpsa;Actn4;Paics;Eef1a1;Hnrnpk;Dlg4;Rpl27a;Rpl26;Arf5;Dbn1;Eif3b;Plec
Aging_Perturbations_from_GEO_up	Rat femur 28 weeks vs 54 weeks GDS509 aging:271	5.546	3.09158e-15	Arf1;Rab5b;Loc100363469;Ywhab;Rplp0;Clta;Slc3a2;Eno1;Hmgb1;Rpl8;Rpl9;Cnn3;Acan;Tmsb4x;Serpinh1;Rpl35;Rpl15;Rps27a;Tmsb10;Rps9;Rps7;Rps8;Pgam1;Rps6;Dynll1;Atp5f1;Paics;Sirt2;Gnb2l1;Nme1;Eef1a1;Hnrnpk;Naca;Rpl27a;Atp6v1b2;Cpe;Rpl27;Rpl26;Dbn1;Plec
Aging_Perturbations_from_GEO_up	Rat hippocampus CA1 18 months vs 28 months GSE21681 aging:353	5.97673	4.11526e-15	Camk2b;Rplp0;Hpca;Rasgrf1;Slc3a2;Eno1;Icam5;Clu;Ptms;Pcsk1n;Basp1;Tmsb4x;Cfl1;Rpl35;Bsn;Glul;Sptan1;Got1;Mink1;Ap2b1;Dynll1;Coro2b;Mt3;Sirt2;Mlf2;Gfap;Qdpr;Map1a;Uqcrc1;Ociad1;Rpl27;Rps20;Rpl26;Aco2;Phpt1;Shank3;Sfxn5
Aging_Perturbations_from_GEO_up	Rat thoracicaorta 3 months vs 15 months GDS3077 aging:120	5.54194	6.37321e-15	Ahcy;Ndufb6;Loc100363469;Cox4i1;Rplp0;Dbi;Rpl8;Rpl9;Clu;Auh;Psmb2;Tmsb4x;Rpl35;Rpl15;Rps27a;Sptan1;Tmsb10;Trap1;Rps9;Mdh1;Ndufa5;Mdh2;Rps8;Ndufa4;Idh2;Gnb2l1;Tjp1;Eef1a1;H1f0;Hnrnpk;Ndufs8;Naca;Ncl;Cpe;Rpl27;Aco1;Rpl26;Slc25a4;Mgll
Aging_Perturbations_from_GEO_up	Rat femur 10 weeks vs 56 weeks GDS509 aging:266	5.36217	1.5419e-14	Arf1;Psmd11;Ralb;Ywhab;Rplp0;Hdlbp;Clta;Eno1;Clu;Ptms;Cnn3;Acan;Auh;Tmsb4x;Cfl1;Serpinh1;Rpl35;Rps2;Tmsb10;Rps7;Lamb2;Pgam1;Nme2;Rpsa;Actn4;Dynll1;Paics;Mt3;Sirt2;Fkbp1a;Tjp1;Rpl27a;Eef1a2;Cpe;Rpl27;Aco1;Rpl26;Arf5;Plec
Aging_Perturbations_from_GEO_up	Rat hippocampus dentate gyrus 18 months vs 28 months GSE21681 aging:357	5.33775	3.65754e-14	Ddx6;Ndufb6;Rplp0;Cisd1;Eno1;Icam5;Clu;Hsd17b10;Hspd1;Pcsk1n;Tmsb4x;Rpl35;Glul;Got1;Hspa4;Mink1;Ap2b1;Coro2b;Mt3;Sirt2;Gnb2l1;Mlf2;Gfap;Qdpr;Map1a;Uqcrc1;Ociad1;Cdh13;Ndufs2;Rpl27;Stub1;Rpl26;Aco2;Phpt1;Shank3;Sfxn5;Dbn1;Gstm5
Aging_Perturbations_from_GEO_up	Rat femur 12 weeks vs 32 weeks GDS509 aging:261	5.28014	1.03725e-13	Camk2b;Arf1;Ndufb6;Loc100363469;Cox4i1;Rplp0;Hdlbp;Clta;Eno1;Atp5b;Acan;Tmsb4x;Serpinh1;Ap2s1;Rpl35;Rpl15;Rps2;Glul;Tmsb10;Rps9;Ndufa5;Mdh2;Pgam1;Idh2;Nme2;Rpsa;Sdha;Sod2;Mt3;Tuba4a;Fkbp1a;Tjp1;Eef1a2;Atp6v1b2;Cpe;Slc25a4;Pfkm
Aging_Perturbations_from_GEO_up	Rat posteriorcricoarytenoid 6 months vs 30 months GDS1278 aging:74	5.93576	1.18015e-13	Camk2b;Psmd11;Anp32a;Loc100363469;Rplp0;Clta;Dbi;Slc3a2;Clu;Tmsb4x;Cfl1;Rpl35;Rplp2;Rps2;Glul;Tmsb10;Sh3gl1;Rps9;Hsp90aa1;Rps7;Rps8;Anxa4;Rps6;Atp1b1;Atp5f1;Tuba4a;Gnb2l1;Eef1a1;Rpl27a;Eef1a2;Suclg1;Rpl26;Eif3b
Aging_Perturbations_from_GEO_up	Rat femur 8 weeks vs 54 weeks GDS509 aging:265	4.79995	2.45527e-12	Rab5b;Loc100363469;Ywhab;Rplp0;Hdlbp;Clta;Atp2a2;Eno1;Rpl8;Rpl9;Clu;Cnn3;Acan;Auh;Tmsb4x;Pgk1;Rpl35;Rplp2;Rpl15;Rps2;Tmsb10;Pgam1;Rps6;Nme2;Rpsa;Dynll1;Sdha;Paics;Sirt2;Fkbp1a;Eef1a1;Naca;Rpl27;Rpl26;Eif3b;Plec
Aging_Perturbations_from_GEO_up	Rat liver 6 months vs 24 months GSE11097 aging:198	5.08481	4.74523e-12	Rnf14;Rplp0;Dbi;Glrx;Eno1;Rpl8;Rpl9;Rtn4;Hspd1;Sh3bgrl;Tmsb4x;Rpl15;Rps2;Rps27a;Sptan1;Rps9;Hsp90aa1;Rps7;Rps8;Rps6;Nme2;Dynll1;Gnb2l1;Eef1a1;Mthfd1;Naca;Rpl27a;Vdac3;Rpl27;Rps20;Rpl26;Hprt1;Pabpc1
Aging_Perturbations_from_GEO_up	Rat thoracicaorta 6 months vs 15 months GDS3077 aging:122	5.42263	4.74523e-12	Ahcy;Psmd11;Ywhab;Rplp0;Dbi;Rpl9;Clu;Ptms;Auh;Cfl1;Rpl35;Sptan1;Tmsb10;Sh3gl1;Trap1;Rps9;Rps8;Lamb2;Idh2;Actn4;Atp1b1;Paics;Gnb2l1;Gnao1;H1f0;Ncl;Cpe;Aco1;Rpl26;Slc25a4;Mgll
Aging_Perturbations_from_GEO_up	Rat heart 4 months vs 28 months GDS3102 aging:125	5.38176	5.42718e-12	Rpl30;Ndrg4;Ndufb6;Rplp0;Pdcd5;Eno1;Timm10;Rpl8;Rpl9;Clu;Tmsb4x;Rpl35;Rpl15;Rps27a;Glul;Sptan1;Rps9;Hsp90aa1;Rps7;Rps8;Rps6;Rpsa;Dynll1;Gnb2l1;Eef1a1;Naca;Rpl27a;Rpl27;Rps20;Rpl26;Pabpc1
Aging_Perturbations_from_GEO_up	Rat diaphysealfemoralcallus 6 weeks vs 26 weeks GDS1995 aging:115	5.57336	5.42718e-12	Camk2b;Psmd11;Rplp0;Hdlbp;Atp2a2;Eno1;Rpl9;Clu;Atp5b;Auh;Serpinh1;Rpl35;Rps2;Rps9;Mdh1;Mdh2;Lamb2;Ndufa4;Tpm1;Idh2;Nme2;Rpsa;Sirt2;Eef1a2;Suclg1;Mapt;Slc25a4;Pfkm;Plec;Eif3b
Aging_Perturbations_from_GEO_up	Rat femur 7 weeks vs 27 weeks GDS509 aging:258	5.36155	5.72281e-12	Camk2b;Rpl30;Psmd11;Loc100363469;Rplp0;Hdlbp;Eno1;Clu;Cnn3;Acan;Basp1;Serpinh1;Rpl35;Rplp2;Rps2;Tmsb10;Cyb5a;Hsp90aa1;Rps8;Rps6;Nme2;Rpsa;Dynll1;Sod2;Tuba4a;Vcan;Rpl27a;Rpl27;Dbn1;Plec;Eif3b
Aging_Perturbations_from_GEO_up	Rat femur 32 weeks vs 58 weeks GDS509 aging:273	4.25406	1.42903e-11	Vps29;Rpl30;Rab5b;Gsk3a;Psmd11;Loc100363469;Ywhab;Rplp0;Hdlbp;Twf1;Slc3a2;Rpl8;Rpl9;Clu;Ptms;Tmsb4x;Cfl1;Serpinh1;Rpl15;Rps9;Rps7;Rps8;Actn4;Atp5f1;Paics;Sirt2;Gnb2l1;Eef1a1;Hnrnpk;Ddx39b;Naca;Dlg4;Rpl27a;Rpl27;Rpl26;Srsf5;Arf5;Eif3b
Aging_Perturbations_from_GEO_up	Rat liver 11 months vs 24 months GSE11097 aging:200	5.00412	2.69565e-11	Rnf14;Rplp0;Dbi;Glrx;Eno1;Rpl8;Rpl9;Rtn4;Tmsb4x;Rpl15;Rps2;Rps27a;Sptan1;Rps9;Rps7;Rps8;Rps6;Nme2;Rpsa;Dynll1;Gnb2l1;Eef1a1;Naca;Sarnp;Rpl27a;Ncl;Vdac3;Rpl27;Rps20;Rpl26;Pabpc1
Aging_Perturbations_from_GEO_up	Rat liver 6 months vs 11 months GSE11097 aging:196	4.75963	4.08614e-11	Arf1;Ahcy;Psmd11;Cisd1;Gstt3;Glrx;Etfb;Clu;Hspd1;Sh3bgrl;Tmsb4x;Hibch;Atp6v1g1;Hsp90aa1;Rps7;Rps8;Ndufa4;Pgam1;Rps6;Idh2;Paics;Tuba4a;Gnb2l1;Qdpr;Uqcrc1;Vdac3;Ndufs2;Suclg1;Hprt1;Pabpc1;Tkt;Aldh7a1
Aging_Perturbations_from_GEO_up	Rat liver 18 months vs 24 months GSE11097 aging:201	4.86731	4.90341e-11	Anp32a;Rnf14;Glrx;Eno1;Rpl8;Rtn4;Hspd1;Atp5b;Pgk1;Rpl35;Rpl15;Rps27a;Rps9;Hsp90aa1;Mdh1;Rps7;Rps8;Rps6;Nme2;Rpsa;Tuba4a;Gnb2l1;Eef1a1;Naca;Sarnp;Rpl27a;Rpl27;Rps20;Rpl26;Hprt1;Pabpc1
Aging_Perturbations_from_GEO_up	Rat femur 8 weeks vs 28 weeks GDS509 aging:259	4.68381	5.80777e-11	Camk2b;Loc100363469;Cox4i1;Rplp0;Hdlbp;Atp2a2;Rpl9;Clu;Cnn3;Auh;Psmb2;Pgk1;Psmd1;Rpl35;Rplp2;Rps2;Tmsb10;Ndufa5;Ndufa4;Tpm1;Nme2;Rpsa;Dynll1;Sdha;Sod2;Fkbp1a;Psmc1;Eef1a2;Rpl26;Slc25a4;Pfkm;Eif3b
Aging_Perturbations_from_GEO_up	Rat femur 26 weeks vs 52 weeks GDS509 aging:269	4.81789	6.03575e-11	Vps29;Rpl30;Arf1;Rpl8;Clu;Atic;Tmsb4x;Cfl1;Pgk1;Ncam1;Rpl15;Rps2;Glul;Tmsb10;Rps7;Rps6;Rpsa;Dynll1;Sirt2;Tuba4a;Eef1a1;Hnrnpk;Ddx39b;Naca;Psmc1;Eef1a2;Rpl27;Aco1;Rpl26;Tkt;Plec
Aging_Perturbations_from_GEO_up	Rat whiteadipose 4 months vs 28 months GDS3102 aging:126	5.08697	7.67968e-11	Rpl30;Rplp0;Rpl8;Rpl9;Ndrg1;Oxct1;Tmsb4x;Rpl35;Rpl15;Rps2;Rps27a;Rps9;Rps7;Rps8;Rps6;Rpsa;Gnb2l1;Tjp1;Cxcl12;Arpc2;Rab14;Naca;Rpl27a;Cpe;Rpl27;Rps20;Rpl26;Hprt1;Srsf5
Aging_Perturbations_from_GEO_up	Rat diaphysealfemoralcallus 6 weeks vs 52 weeks GDS1995 aging:116	4.45783	8.94328e-11	Camk2b;Arf1;Rnh1;Psmd11;Rplp0;Hdlbp;Atp2a2;Eno1;Rpl9;Clu;Ptms;Atp5b;Auh;Rps2;Glul;Rps9;Mdh1;Mdh2;Tpm1;Idh2;Rpsa;Sdha;Paics;Sirt2;Tjp1;Eef1a2;Rpl27;Mapt;Slc25a4;Pfkm;Arf5;Plec;Eif3b
Aging_Perturbations_from_GEO_up	Rat liver 12 months vs 24 months GSE11097 aging:194	4.63551	2.73629e-10	Rpl30;Rplp0;Dbi;Slc3a2;Rpl8;Rpl9;Psmb2;Rpl35;Rpl15;Rps27a;Eif5a;Rps9;Hsp90aa1;Rps7;Rps8;Rps6;Nme2;Rpsa;Atp5f1;Gnb2l1;Eef1a1;Hnrnpk;Mthfd1;Naca;Rpl27a;Fabp7;Ncl;Rps20;Rpl26;Hprt1
Aging_Perturbations_from_GEO_up	Rat femur 10 weeks vs 30 weeks GDS509 aging:260	5.47031	3.88112e-10	Camk2b;Psmd11;Loc100363469;Rplp0;Hdlbp;Slc3a2;Eno1;Clu;Coro1b;Ptms;Acan;Psmb2;Tmsb4x;Serpinh1;Rpl35;Rps2;Ndufa4;Pgam1;Tpm1;Nme2;Mt3;Fkbp1a;Dlg4;Eef1a2;Slc25a4
Aging_Perturbations_from_GEO_up	Rat liver 6 months vs 18 months GSE11097 aging:197	4.62622	5.44985e-10	Rplp0;Gstt3;Glrx;Clu;Rtn4;Hspd1;Sh3bgrl;Tmsb4x;Rps27a;Glul;Sptan1;Eif5a;Rps7;Rps8;Pgam1;Rps6;Nme2;Dynll1;Gnb2l1;Mlf2;Fkbp1a;Eef1a1;Cxcl12;Arpc3;Vdac3;Rpl26;Hprt1;Pabpc1;Aldh7a1
Aging_Perturbations_from_GEO_up	Rat thoracicaorta 3 months vs 28 months GDS3077 aging:121	4.59416	6.24635e-10	Vps29;Loc100363469;Rplp0;Rpl8;Rpl9;Clu;Cnn3;Tmsb4x;Rpl35;Rplp2;Rpl15;Rps27a;Sptan1;Rps9;Rps7;Rps8;Rps6;Rpsa;Actn4;Gnb2l1;Tjp1;Eef1a1;H1f0;Hnrnpk;Rpl27a;Cpe;Rpl27;Rpl26;Slc25a4
Aging_Perturbations_from_GEO_up	Rat diaphysealfemoralcallus 26 weeks vs 52 weeks GDS1995 aging:117	3.87248	1.24677e-09	Arf1;Rnh1;Psmd11;Loc100363469;Ywhab;Rplp0;Clta;Atp2a2;Slc3a2;Rpl9;Clu;Ptms;Auh;Basp1;Tmsb4x;Glul;Rps9;Rps7;Rps8;Pgam1;Idh2;Sdha;Atp5f1;Paics;Gnb2l1;Tjp1;H1f0;Hnrnpk;Dlg4;Hnrnpf;Eef1a2;Rpl27;Arf5;Plec
Aging_Perturbations_from_GEO_up	Rat hippocampus 7 months vs 21 months GDS4019 aging:97	4.39462	2.85782e-09	Rpl30;Ndrg4;Cox4i1;Arhgap39;Slc3a2;Ndrg1;Dpysl2;Mbp;Rpl15;Tppp;Rps27a;Glul;Nefh;Mog;Rps7;Nme2;Rpsa;Ptpn11;Ermn;Gfap;Eef1a1;Qdpr;Gprc5b;Hgs;Naca;Ncl;Rpl27;Rps20
Aging_Perturbations_from_GEO_up	Rat liver 4 months vs 24 months GSE11097 aging:191	4.20063	3.68966e-09	Rplp0;Clta;Dbi;Slc3a2;Eno1;Rpl8;Rpl9;Rpl35;Rpl15;Rps2;Rps27a;Rps9;Hsp90aa1;Rps7;Mdh2;Rps8;Rps6;Gnb2l1;Eef1a1;Hnrnpk;Cxcl12;Naca;Rpl27a;Fabp7;Ncl;Vdac3;Rps20;Rpl26;Hprt1
Aging_Perturbations_from_GEO_up	Rat extraocularmuscles 6 months vs 30 months GDS1279 aging:72	3.98067	3.33994e-08	Camk2b;Faah;Loc100363469;Psmd13;Hdlbp;Clta;Dbi;Eno1;Clu;Hspd1;Tmsb4x;Rps2;Glul;Cyb5a;Hsp90aa1;Rps8;Ndufa4;Nme2;Sirt2;Eef1a1;Naca;Rpl27;Aco1;Rpl26;Tkt;Pfkm;Mgll
Aging_Perturbations_from_GEO_up	Rat myocardium 18 weeks vs 22 weeks GDS4025 aging:142	4.54024	7.88483e-08	Ndrg4;Ndufa11;Lamb2;Cox4i1;Rplp0;Idh2;Eno1;Clu;Eef1a1;Ddx39b;Dpysl2;Tmsb4x;Asna1;Map1a;Eef1a2;Rpl35;Rpl27;Srsf5;Aco2;Sptan1;Tmsb10;Plec
Aging_Perturbations_from_GEO_up	Rat thoracicaorta 15 months vs 28 months GDS3077 aging:124	4.17576	8.42847e-08	Rps9;Rps7;Loc100363469;Rps8;Ywhab;Rplp0;Rpsa;Rpl8;Clu;Gnb2l1;Cnn3;Tjp1;Eef1a1;H1f0;Rpl27a;Tmsb4x;Rpl35;Rplp2;Cpe;Rpl26;Rpl15;Rps2;Sptan1;Tmsb10
Aging_Perturbations_from_GEO_up	Rat thoracicaorta 6 months vs 28 months GDS3077 aging:123	4.27079	1.07132e-07	Rps9;Ndrg4;Rps7;Rps8;Lamb2;Rplp0;Rpsa;Actn4;Rpl8;Atp1b1;Rpl9;Clu;Gnb2l1;Ptms;H1f0;Tmsb4x;Cfl1;Rpl35;Rplp2;Cpe;Rpl26;Rpl15;Sptan1
Aging_Perturbations_from_GEO_up	Rat femur 6 weeks vs 52 weeks GDS509 aging:262	3.804	2.22923e-07	Psmd11;Ndufb6;Loc100363469;Cox4i1;Slc3a2;Clu;Auh;Rplp2;Glul;Sh3gl1;Cyb5a;Hsp90aa1;Rps8;Pgam1;Idh2;Tuba4a;Gnb2l1;Nme1;Hnrnpk;Hnrnpf;Hprt1;Srsf5;Tkt;Pfkm;Arf5
Aging_Perturbations_from_GEO_up	Rat ventricle 4 months vs 21 months GDS399 aging:112	4.22729	4.26487e-07	Rps9;Rps7;Loc100363469;Mdh2;Rps8;Ndufa4;Rps6;Rpl8;Atp5f1;Rpl9;Gnb2l1;Tjp1;Eef1a1;Naca;Rpl27a;Rpl27;Rpl26;Srsf5;Rps27a;Glul;Tmsb10
Aging_Perturbations_from_GEO_up	Rat femur 6 weeks vs 26 weeks GDS509 aging:256	3.94048	3.8749e-05	Camk2b;Ndufa5;Mdh1;Cox4i1;Tpm1;Idh2;Atp2a2;Slc3a2;Atp5f1;Clu;Tuba4a;Glul;Slc25a4;Pfkm;Sh3gl1
Aging_Perturbations_from_GEO_up	Rat liver 4 months vs 12 months GSE11097 aging:190	3.05554	9.25508e-05	Ahcy;Mdh1;Got1;Ndufa4;Rplp0;Adk;Dbi;Eno1;Rpl8;Paics;Atp5l;Qdpr;H1f0;Cxcl12;Tmsb4x;Vdac3;Rpl15;Rps2;Aldh7a1
Aging_Perturbations_from_GEO_up	Rat liver 4 months vs 12 months GSE11097 aging:192	2.85022	0.000212939	Rpl30;Arf1;Rps9;Ndufa11;Rps7;Dbi;Paics;Adh5;Sh3bgrl;Cxcl12;Psmb2;Sv2b;Arpc3;Naca;Rpl27a;Tmsb4x;Rpl35;Rps20;Rpl15
Aging_Perturbations_from_GEO_up	Rat liver 4 months vs 24 months GSE11097 aging:193	2.61469	0.000774183	Arf1;Mdh1;Rps7;Rps6;Dbi;Eno1;Etfb;Atp5l;Fkbp1a;Cxcl12;Auh;Sv2b;Naca;Tmsb4x;Rpl35;Rps20;Pabpc1;Rps27a
Aging_Perturbations_from_GEO_up	Rat liver 11 months vs 18 months GSE11097 aging:199	2.68033	0.00117546	Eif5a;Cyb5a;Rps9;Rplp0;Rps6;Glrx;Rtn4;Eef1a1;Cxcl12;Tmsb4x;Ncl;Rpl27;Rpl26;Rps2;Rps27a;Sptan1
Aging_Perturbations_from_GEO_up	Rat hippocampus 7 months vs 21 months GDS4019 aging:98	2.48819	0.00323231	Ndrg4;Ndufa11;Dynll2;Ndrg1;Gfap;Eef1a1;Qdpr;Gprc5b;Sh3bgrl;Rcn2;Ddx39b;Dpysl2;Map1a;Rpl35;Rps27a
Aging_Perturbations_from_GEO_down	Rat hippocampus 7 months vs 21 months GDS4019 aging:98	8.08634	3.57747e-22	Camk2b;Vps29;Gpm6a;Dync1i2;Rtn1;Ywhab;Hpca;Rasgrf1;Camk2a;Crmp1;Atp5b;Camkv;Tmsb4x;Nefl;Rps2;Sptan1;Chgb;Eif5a;Slc12a5;Kcnd2;Rps7;Got1;Ndufa4;Rps6;Nme2;Dynll1;Atp1b1;Mt3;Olfm1;Hnrnpk;Abi2;Arpc2;Arpc3;Ncl;Abi1;Vdac3;Rimbp2;Atp6v1b2;Ociad1;Cpe;Lppr4;Srsf5;Tnik;Atp6v0d1;Slc25a4
Aging_Perturbations_from_GEO_down	Rat thoracicaorta 6 months vs 28 months GDS3077 aging:123	7.84302	3.57747e-22	Rpl30;Arf1;Ndufb6;Cox4i1;Dlst;Dbi;Eno1;Acat2;Acat1;Hspd1;Atp5b;Auh;Serpinh1;Pgk1;Rps27a;Glul;Tmsb10;Hspa9;Cyb5a;Hsp90aa1;Pcyt2;Mdh1;Ndufa5;Mdh2;Ndufa4;Pgam1;Rps6;Tpm1;Idh2;Nme2;Dynll1;Sdha;Atp5f1;Sod2;Eef1a1;Hnrnpk;Ndufs8;Naca;Hnrnpf;Suclg1;Aco1;Hprt1;Tkt;Aldh7a1;Mgll;Gstm5
Aging_Perturbations_from_GEO_down	Rat thoracicaorta 6 months vs 15 months GDS3077 aging:122	8.22783	5.1581e-22	Vps29;Rpl30;Arf1;Ndufb6;Loc100363469;Cox4i1;Dlst;Eno1;Acat2;Acat1;Cnn3;Hspd1;Atp5b;Tmsb4x;Serpinh1;Pgk1;Rplp2;Rpl15;Rps2;Rps27a;Glul;Cyb5a;Hsp90aa1;Mdh1;Rps7;Ndufa5;Mdh2;Pgam1;Rps6;Tpm1;Nme2;Rpsa;Dynll1;Sdha;Atp5f1;Sod2;Eef1a1;Hnrnpk;Naca;Hnrnpf;Rpl27a;Suclg1;Tkt;Gstm5
Aging_Perturbations_from_GEO_down	Rat heart 4 months vs 28 months GDS3102 aging:125	7.11892	6.44105e-18	Ndufa11;Cox4i1;Cisd1;Atp2a2;Etfb;Hsd17b10;Atp5l;Acat1;Atp5b;Chchd3;Oxct1;Pgk1;Rps2;Hspa9;Mdh1;Got1;Mdh2;Lamb2;Ndufa4;Tpm1;Idh2;Acot13;Atp1b1;Sdha;Atp5f1;Sod2;Aldh6a1;Hnrnpk;Ndufs8;Eef1a2;Uqcrc1;Vdac3;Ndufs3;Cpe;Ndufs2;Suclg1;Aco2;Slc25a4;Pfkm
Aging_Perturbations_from_GEO_down	Rat femur 6 weeks vs 26 weeks GDS509 aging:256	5.7197	7.00329e-17	Arf1;Ywhab;Rplp0;Arpc5l;Hdlbp;Eno1;Rpl8;Rpl9;Cnn3;Hspd1;Atp5b;Tmsb4x;Serpinh1;Pgk1;Rpl35;Rpl15;Rps2;Rps27a;Tmsb10;Rps9;Hsp90aa1;Rps7;Rps8;Tpm3;Ndufa4;Pgam1;Rps6;Nme2;Rpsa;Dynll1;Sdha;Paics;Gnb2l1;Eef1a1;Hnrnpk;Ddx39b;Hnrnpf;Rpl27a;Cpe;Rpl27;Suclg1;Rpl26;Srsf5;Tkt
Aging_Perturbations_from_GEO_down	Rat thoracicaorta 15 months vs 28 months GDS3077 aging:124	6.58657	1.54016e-16	Rpl30;Psmd11;Ndufb6;Dlst;Atp2a2;Dbi;Eno1;Rpl9;Ptms;Hspd1;Atp5b;Auh;Sh3gl1;Trap1;Hsp90aa1;Mdh1;Ndufa5;Mdh2;Lamb2;Ndufa4;Pgam1;Tpm1;Idh2;Nme2;Dynll1;Sdha;Atp5f1;Gnao1;Ndufs8;Naca;Hnrnpf;Suclg1;Aco1;Hprt1;Tkt;Aldh7a1;Slc25a4;Mgll
Aging_Perturbations_from_GEO_down	Rat frontalcortex 4 months vs 22 months GDS3939 aging:99	6.23985	6.99649e-16	Camk2b;Gpm6a;Ndrg4;Ndufb6;Ttyh1;Ywhab;Camk2a;Crmp1;Hspd1;Sv2b;Oxct1;Nefm;Rps2;Sptan1;Chgb;Hsp90aa1;Slc6a17;Got1;Hspa4;Ndufa4;Dynll1;Atp5f1;Mt3;Pgm2l1;Tuba4a;Fkbp1a;Pdp1;Gnao1;Olfm1;Abi2;Arpc3;Cpe;Suclg1;Lppr4;Aco2;Nptxr;Slc25a4;Sfxn5
Aging_Perturbations_from_GEO_down	Rat ventricle 4 months vs 21 months GDS399 aging:112	5.92022	1.23839e-15	Arf1;Ndrg4;Ndufb6;Cox4i1;Hpca;Dlst;Atp2a2;Eno1;Clu;Ptms;Hspd1;Atp5b;Psmb2;Prkar2a;Tmsb4x;Cfl1;Pgk1;Rplp2;Rps2;Trap1;Mdh1;Ndufa5;Lamb2;Pgam1;Tpm1;Idh2;Nme2;Rpsa;Atp1b1;Sdha;Sod2;Fkbp1a;Ndufs8;Dlg4;Eef1a2;Suclg1;Slc25a4;Pfkm;Mgll
Aging_Perturbations_from_GEO_down	Rat myocardium 18 weeks vs 22 weeks GDS4025 aging:142	5.66227	8.96752e-15	Pdcd5;Cisd1;Ola1;Dbi;Timm10;Etfb;Rpl8;Rpl9;Hsd17b10;Atp5l;Acat1;Hspd1;Atp5b;Auh;Oxct1;Rps27a;Hibch;Eif5a;Rgd1304704;Atp6v1g1;Hsp90aa1;Got1;Ndufa5;Rps8;Rps6;Atp5f1;Aldh6a1;Sarnp;Rpl27a;Cops2;Vdac3;Cpe;Suclg1;Rps20;Rpl26;Hprt1;Slc25a4;Pfdn6
Aging_Perturbations_from_GEO_down	Rat diaphysealfemoralcallus 6 weeks vs 26 weeks GDS1995 aging:115	6.00904	8.96752e-15	Loc100363469;Ywhab;Cox4i1;Clta;Hmgb1;Rpl8;Cnn3;Hspd1;Acan;Basp1;Tmsb4x;Rplp2;Rpl15;Rps27a;Tmsb10;Hsp90aa1;Rps7;Rps8;Rps6;Atp5f1;Paics;Mt3;Gnb2l1;Nme1;Fkbp1a;H1f0;Hnrnpk;Rcn2;Naca;Hnrnpf;Rpl27a;Cpe;Rpl26;Hprt1;Srsf5;Gstm5
Aging_Perturbations_from_GEO_down	Rat femur 26 weeks vs 52 weeks GDS509 aging:269	6.57305	1.18849e-14	Psmd11;Loc100363469;Cox4i1;Rplp0;Hdlbp;Slc3a2;Eno1;Rpl9;Ptms;Cnn3;Hspd1;Acan;Auh;Psmb2;Basp1;Serpinh1;Rplp2;Rps27a;Sptan1;Sh3gl1;Rps9;Hsp90aa1;Mdh2;Rps8;Tpm1;Nme2;Atp5f1;Gnb2l1;Vcan;Hnrnpf;Rpl27a;Cpe;Slc25a4
Aging_Perturbations_from_GEO_down	Rat whiteadipose 4 months vs 28 months GDS3102 aging:126	6.08969	1.38333e-14	Ndufa11;Ywhab;Cox4i1;Cisd1;Dbi;Eno1;Etfb;Rtn4;Atp5l;Hspd1;Atp5b;Sh3bgrl;Serpinh1;Pgk1;Phgdh;Glul;Tmsb10;Eif5a;Cyb5a;Mdh1;Ndufa4;Pgam1;Nme2;Dynll1;Fah;Sdha;Atp5f1;Fkbp1a;Vdac3;Ndufs2;Suclg1;Aco1;Aco2;Tkt;Mgll
Aging_Perturbations_from_GEO_down	Rat femur 7 weeks vs 27 weeks GDS509 aging:258	6.03676	3.91384e-14	Arf1;Rab5b;Ywhab;Cox4i1;Dlst;Atp2a2;Rpl8;Rpl9;Hspd1;Atp5b;Tmsb4x;Pgk1;Mdh1;Rps7;Got1;Ndufa5;Mdh2;Ndufa4;Tpm1;Idh2;Sdha;Atp5f1;Paics;Mt3;Eef1a1;Naca;Hnrnpf;Atp6v1b2;Cpe;Suclg1;Rpl26;Srsf5;Slc25a4;Pfkm
Aging_Perturbations_from_GEO_down	Rat femur 6 weeks vs 52 weeks GDS509 aging:262	6.22487	1.02311e-13	Arf1;Arpc5l;Hdlbp;Rpl8;Cnn3;Atp5b;Acan;Serpinh1;Pgk1;Rpl35;Rpl15;Rps2;Tmsb10;Rps9;Mdh1;Mdh2;Ndufa4;Rps6;Nme2;Dynll1;Sdha;Mt3;Eef1a1;Naca;Dlg4;Rpl27a;Eef1a2;Cpe;Suclg1;Rpl26;Slc25a4;Plec
Aging_Perturbations_from_GEO_down	Rat posteriorcricoarytenoid 6 months vs 30 months GDS1278 aging:74	5.67132	3.79112e-13	Arf1;Ndufb6;Ywhab;Cox4i1;Adk;Dlst;Atp2a2;Eno1;Rpl9;Acat1;Hspd1;Atp5b;Auh;Pgk1;Rpl15;Hspa9;Mdh1;Got1;Ndufa5;Mdh2;Lamb2;Ndufa4;Tpm1;Idh2;Nme2;Dynll1;Sdha;Sod2;Aldh6a1;Psmc1;Cpe;Pfkm;Arf5
Aging_Perturbations_from_GEO_down	Rat femur 10 weeks vs 30 weeks GDS509 aging:260	5.17253	3.79112e-13	Rpl30;Arf1;Rab5b;Arpc5l;Hmgb1;Rpl8;Rpl9;Hspd1;Atp5b;Pgk1;Rpl15;Rps27a;Hnrnpa1;Glul;Cyb5a;Rps9;Ndufa5;Rps8;Rps6;Sdha;Atp5f1;Paics;Tuba4a;Gnb2l1;Nme1;Eef1a1;H1f0;Hnrnpk;Ddx39b;Naca;Hnrnpf;Rpl27;Srsf5;Pfkm;Arf5;Eif3b
Aging_Perturbations_from_GEO_down	Rat hippocampus CA3 18 months vs 28 months GSE21681 aging:356	6.68279	7.07732e-13	Gpm6a;Rtn3;Rpl30;Ndrg4;Sec23a;Rtn1;Rnf14;Oxct1;Pgk1;Nefl;Nefm;Tppp;Chgb;Hsp90aa1;Mdh1;Mog;Pgam1;Rps6;Pgm2l1;Nme1;Eef1a1;Hnrnpk;Rcn2;Vsnl1;Atp6v1b2;Cpe;Hprt1;Slc25a4
Aging_Perturbations_from_GEO_down	Rat hippocampus 7 months vs 21 months GDS4019 aging:97	5.89195	7.82885e-13	Arf1;Rtn1;Ywhab;Rnf14;Glrx;Atp5b;Oxct1;Cfl1;Rps2;Sptan1;Tmsb10;Rab2a;Slc12a5;Mdh1;Ndufa4;Ap2b1;Dynll1;Atp1b1;Tuba4a;Nme1;Gap43;Ndufs8;Abi2;Fabp7;Scg5;Atp6v1b2;Lppr4;Hprt1;Srsf5;Agrn;Slc25a4
Aging_Perturbations_from_GEO_down	Rat hippocampus CA1 18 months vs 28 months GSE21681 aging:353	5.83213	2.19616e-12	Gpm6a;Dync1i2;Napb;Rtn3;Ndrg4;Rtn1;Rpl8;Impa1;Oxct1;Nefl;Nefm;Tppp;Chgb;Mdh1;Rps8;Pgam1;Rps6;Wdr13;Pgm2l1;Tuba4a;Nme1;Eef1a1;Gap43;Hnrnpk;Rcn2;Vsnl1;Scg5;Atp6v1b2;Hprt1;Slc25a4
Aging_Perturbations_from_GEO_down	Rat thoracicaorta 3 months vs 28 months GDS3077 aging:121	5.64165	4.54734e-12	Arf1;Ndufb6;Cox4i1;Dlst;Atp2a2;Dbi;Eno1;Acat2;Hspd1;Atp5b;Auh;Serpinh1;Glul;Trap1;Hsp90aa1;Pcyt2;Mdh1;Ndufa5;Mdh2;Ndufa4;Pgam1;Idh2;Nme2;Dynll1;Sdha;Atp5f1;Ndufs8;Suclg1;Aco1;Tkt
Aging_Perturbations_from_GEO_down	Rat hippocampus CA3 18 months vs 28 months GSE21681 aging:355	5.82048	5.17444e-12	Gpm6a;Rtn3;Ndrg4;Rtn1;Rnf14;Wdr61;Atp5b;Oxct1;Nefm;Chgb;Rps9;Mdh1;Mog;Rps8;Pgam1;Rps6;Pgm2l1;Nme1;Gap43;Rcn2;Vsnl1;Pithd1;Fabp7;Atp6v1b2;Cpe;Suclg1;Hprt1;Sugt1;Slc25a4
Aging_Perturbations_from_GEO_down	Rat diaphysealfemoralcallus 6 weeks vs 52 weeks GDS1995 aging:116	6.17576	2.02185e-11	Rpl30;Ywhab;Cox4i1;Hmgb1;Rpl8;Hspd1;Tmsb4x;Serpinh1;Rplp2;Rpl15;Rps27a;Tmsb10;Hsp90aa1;Rps8;Rps6;Nme2;Mt3;Gnb2l1;Nme1;Hnrnpk;Naca;Hnrnpf;Rpl27a;Cpe;Rpl26;Srsf5
Aging_Perturbations_from_GEO_down	Rat femur 32 weeks vs 58 weeks GDS509 aging:273	8.0409	2.53281e-11	Cyb5a;Hsp90aa1;Ndufa5;Mdh1;Psmd13;Cox4i1;Rps6;Nme2;Rpsa;Mt3;Tuba4a;Atp5b;Psmb2;Rpl35;Cpe;Rps2;Rps27a;Tmsb10;Slc25a4;Pfkm;Gstm5
Aging_Perturbations_from_GEO_down	Rat extraocularmuscles 6 months vs 30 months GDS1279 aging:72	5.60627	2.53337e-11	Arf1;Ndrg4;Rab5b;Ywhab;Rplp0;Atp2a2;Rpl9;Gls;Acat1;Serpinh1;Pgk1;Rps27a;Tmsb10;Rps9;Mdh1;Rps7;Ndufa5;Mdh2;Pgam1;Tpm1;Idh2;Atp1b1;Atp5f1;Gnb2l1;H1f0;Rpl27a;Eef1a2;Slc25a4
Aging_Perturbations_from_GEO_down	Rat hippocampus dentate gyrus 18 months vs 28 months GSE21681 aging:357	6.05037	2.8861e-11	Gpm6a;Ndrg4;Rtn1;Rnf14;Cox4i1;Ola1;Rpl8;Rpl9;Stxbp6;Tppp;Chgb;Mdh1;Rps7;Pgam1;Rps6;Atp1b1;Wdr13;Pgm2l1;Eef1a1;Olfm1;Hnrnpk;Abi2;Arpc3;Atp6v1b2;Cpe;Slc25a4
Aging_Perturbations_from_GEO_down	Rat diaphysealfemoralcallus 26 weeks vs 52 weeks GDS1995 aging:117	7.14195	1.69073e-10	Rpl30;Mdh1;Ndufa4;Cox4i1;Rps6;Tpm1;Nme2;Rpsa;Rpl8;Mt3;Eef1a1;Atp5b;Rpl27a;Serpinh1;Cpe;Rpl26;Rpl15;Rps2;Rps27a;Tmsb10;Slc25a4
Aging_Perturbations_from_GEO_down	Rat hippocampus CA1 18 months vs 28 months GSE21681 aging:354	5.17274	1.27925e-09	Gpm6a;Napb;Rtn3;Rnf14;Cox4i1;Rpl8;Rpl9;Napg;Nefm;Tppp;Rps27a;Chgb;Mdh1;Rps8;Pgam1;Rps6;Pgm2l1;Eef1a1;Hnrnpk;Vsnl1;Vdac3;Scg5;Atp6v1b2;Hprt1;Slc25a4
Aging_Perturbations_from_GEO_down	Rat femur 10 weeks vs 56 weeks GDS509 aging:266	5.48102	2.1836e-09	Rps9;Hsp90aa1;Mdh1;Ndufb6;Ndufa5;Loc100363469;Rps8;Cox4i1;Tpm1;Idh2;Arpc5l;Atp5f1;Rpl9;Tuba4a;Gnb2l1;Hspd1;Hnrnpk;Naca;Hnrnpf;Rplp2;Rps27a;Slc25a4;Pfkm
Aging_Perturbations_from_GEO_down	Rat femur 8 weeks vs 28 weeks GDS509 aging:259	4.90946	6.65448e-09	Rpl30;Arf1;Rps9;Rps8;Rps6;Slc3a2;Atp5f1;Mt3;Tuba4a;Gnb2l1;Eef1a1;H1f0;Hnrnpk;Naca;Hnrnpf;Rpl27a;Tmsb4x;Serpinh1;Atp6v1b2;Cpe;Rpl27;Rpl15;Rps27a;Arf5
Aging_Perturbations_from_GEO_down	Rat femur 8 weeks vs 54 weeks GDS509 aging:265	5.34208	7.24627e-09	Rpl30;Rps9;Pcyt2;Mdh1;Got1;Ndufb6;Rps8;Cox4i1;Tpm1;Dlst;Atp5f1;Mt3;Tuba4a;Gnb2l1;Atp5b;H1f0;Hnrnpk;Ndufs8;Hnrnpf;Cpe;Slc25a4;Arf5
Aging_Perturbations_from_GEO_down	Rat extensordigitorumlongusmuscles 6 months vs 30 months GDS1279 aging:70	4.59905	1.9365e-08	Rab5b;Mdh1;Rps7;Got1;Ndufb6;Ndufa5;Mdh2;Ndufa4;Cox4i1;Adk;Nme2;Dlst;Rpl8;Atp1b1;Sod2;Atp5b;Ndufs8;Auh;Suclg1;Rps2;Glul;Slc25a4;Pfkm;Rab7a
Aging_Perturbations_from_GEO_down	Rat femur 7 weeks vs 53 weeks GDS509 aging:264	5.06017	3.34241e-08	Mdh1;Got1;Ndufb6;Ndufa5;Mdh2;Ndufa4;Cox4i1;Tpm1;Idh2;Atp2a2;Sdha;Atp5f1;Rpl9;Mt3;Gnb2l1;Atp5b;Atp6v1b2;Cpe;Suclg1;Slc25a4;Pfkm
Aging_Perturbations_from_GEO_down	Rat femur 12 weeks vs 32 weeks GDS509 aging:261	4.80266	3.52636e-08	Rab5b;Gsk3a;Ahcy;Rps8;Ywhab;Ndufa4;Rps6;Tpm1;Arpc5l;Hmgb1;Rpl8;Rpl9;Paics;Eef1a1;Hnrnpk;Naca;Hnrnpf;Rpl27a;Rplp2;Rpl27;Rpl26;Srsf5
Aging_Perturbations_from_GEO_down	Rat femur 6 weeks vs 26 weeks GDS509 aging:257	4.64606	5.94061e-08	Vps29;Rpl30;Got1;Rps8;Rps6;Tpm1;Rpsa;Eno1;Rpl8;Mt3;Gnb2l1;Eef1a1;Atp5b;Hnrnpk;Naca;Tmsb4x;Cfl1;Eef1a2;Pgk1;Atp6v1b2;Cpe;Tmsb10
Aging_Perturbations_from_GEO_down	Rat femur 26 weeks vs 52 weeks GDS509 aging:268	5.77046	1.25127e-07	Camk2b;Ndrg4;Got1;Ndufa5;Mdh1;Mdh2;Cox4i1;Tpm1;Atp2a2;Dlst;Atp1b1;Atp5b;Naca;Eef1a2;Glul;Slc25a4;Pfkm
Aging_Perturbations_from_GEO_down	Rat femur 28 weeks vs 54 weeks GDS509 aging:271	4.63533	2.33025e-07	Rpl30;Mdh1;Got1;Ndufb6;Ndufa5;Mdh2;Ndufa4;Cox4i1;Tpm1;Idh2;Dlst;Sod2;Hspd1;Atp5b;Ndufs8;Psmb2;Eef1a2;Slc25a4;Pfkm;Arf5
Aging_Perturbations_from_GEO_down	Rat femur 30 weeks vs 56 weeks GDS509 aging:272	5.62979	3.86526e-07	Hsp90aa1;Ndufb6;Ndufa5;Mdh1;Loc100363469;Ndufa4;Cox4i1;Tpm1;Idh2;Hnrnpf;Eef1a2;Serpinh1;Rplp2;Rps27a;Slc25a4;Pfkm
Aging_Perturbations_from_GEO_down	Rat hippocampus dentate gyrus 18 months vs 28 months GSE21681 aging:358	4.00965	5.50497e-07	Vps29;Gpm6a;Napb;Ndrg4;Rtn1;Mdh1;Rps7;Pgam1;Cox4i1;Rps6;Ola1;Wdr61;Wdr13;Pgm2l1;Nme1;Eef1a1;Hnrnpk;Abi2;Atp6v1b2;Hprt1;Tppp;Sugt1
Aging_Perturbations_from_GEO_down	Rat liver 4 months vs 12 months GSE11097 aging:192	3.91482	7.93937e-07	Ahcy;Got1;Ndufa4;Pgam1;Cox4i1;Tpm1;Idh2;Cisd1;Adk;Atp1b1;Atp5f1;Hsd17b10;Hspd1;Qdpr;Atp5b;Hprt1;Srsf5;Aco2;Glul;Aldh7a1;Slc25a4;Pfkm
Aging_Perturbations_from_GEO_down	Rat liver 4 months vs 24 months GSE11097 aging:193	3.83382	1.90868e-06	Cyb5a;Ahcy;Got1;Tpm1;Idh2;Gstt3;Timm10;Atp1b1;Atp5f1;Hsd17b10;Eef1a1;Atp5b;Fabp7;Pgk1;Hprt1;Srsf5;Aco2;Glul;Slc25a4;Pfkm;Fermt2
Aging_Perturbations_from_GEO_down	Rat femur 27 weeks vs 53 weeks GDS509 aging:270	4.23808	5.62844e-06	Cyb5a;Rps9;Mdh1;Ndufb6;Ndufa5;Loc100363469;Rps8;Ndufa4;Cox4i1;Tpm1;Atp5f1;Sod2;Mt3;Hnrnpf;Rplp2;Slc25a4;Pfkm
Aging_Perturbations_from_GEO_down	Rat thoracicaorta 3 months vs 15 months GDS3077 aging:120	3.91138	8.12478e-06	Arf1;Hsp90aa1;Pcyt2;Pgam1;Nme2;Hdlbp;Atp2a2;Eno1;Dynll1;Atp5f1;Acat2;Hspd1;Atp5b;Aldh6a1;Serpinh1;Rps2;Tkt;Glul
Aging_Perturbations_from_GEO_down	Rat femur 6 weeks vs 52 weeks GDS509 aging:263	3.85307	1.7217e-05	Rpl30;Rps9;Rps8;Rplp0;Tpm1;Idh2;Eno1;Mt3;Gnb2l1;Cnn3;Atp5b;Auh;Basp1;Atp6v1b2;Rplp2;Cpe;Tmsb10
Aging_Perturbations_from_GEO_down	Rat liver 12 months vs 24 months GSE11097 aging:195	3.31673	5.9286e-05	Cyb5a;Rps9;Rps8;Rplp0;Gstt3;Timm10;Dynll1;Rpl9;Tuba4a;Gnb2l1;Eef1a1;Psmb2;Rpl27a;Fabp7;Rpl35;Rpl27;Hprt1;Glul
Aging_Perturbations_from_GEO_down	Rat femur 12 weeks vs 58 weeks GDS509 aging:267	4.21341	7.62506e-05	Hsp90aa1;Mdh1;Ndufa4;Cox4i1;Rps6;Tpm1;Arpc5l;Rpsa;Rpl8;Eef1a1;Naca;Rplp2;Rps27a
Aging_Perturbations_from_GEO_down	Rat thoracicaorta 3 months vs 6 months GDS3077 aging:119	3.4091	0.000309699	Lamb2;Rplp0;Idh2;Hdlbp;Atp2a2;Dynll1;Atp1b1;Paics;Ptms;Atp5b;Aldh6a1;Coro7;Sh3gl1;Eif3b
Aging_Perturbations_from_GEO_down	Rat hippocampus CA3 region 6 months vs 25 months GSE14724 aging:347	2.8141	0.00119999	Ddx6;Slc32a1;Kcnd2;Hspa4;Uba5;Rasgrf2;Kcnip4;Hpcal4;Cxcl12;Homer3;Ncam1;Agrn;Ina;Stx1a;Pafah1b1
Aging_Perturbations_from_GEO_down	Rat liver 11 months vs 18 months GSE11097 aging:199	2.57286	0.00140028	Hsp90aa1;Ahcy;Anp32a;Mdh1;Ndufa4;Cisd1;Adk;Gstt3;Fah;Hsd17b10;Tuba4a;Atp5l;Qdpr;Fabp7;Uqcrc1;Pgk1;Tkt
Aging_Perturbations_from_GEO_down	Rat liver 4 months vs 12 months GSE11097 aging:190	2.54589	0.00212799	Cyb5a;Rpl30;Hsp90aa1;Rps8;Cox4i1;Cisd1;Nme2;Gstt3;Rpsa;Atp5b;Mthfd1;Fabp7;Rpl35;Srsf5;Rps27a;Glul
Aging_Perturbations_from_GEO_down	Rat liver 6 months vs 11 months GSE11097 aging:196	2.62039	0.0031699	Rps9;Sec23a;Pcyt2;Got1;Hdlbp;Fah;Atp5f1;Atp5b;Bdh1;Fabp7;Ncl;Rpl27;Rps20;Rps2
Aging_Perturbations_from_GEO_down	Rat liver 18 months vs 24 months GSE11097 aging:201	2.4353	0.00588619	Cyb5a;Ahcy;Gstt3;Sdha;Clu;Hsd17b10;Cnn3;Qdpr;Aldh6a1;Cxcl12;Bdh1;Fabp7;Glul;Aldh7a1
Aging_Perturbations_from_GEO_down	Rat liver 11 months vs 24 months GSE11097 aging:200	2.36108	0.00751368	Ahcy;Psmd11;Ndufa4;Cisd1;Gstt3;Fah;Sdha;Clu;Hsd17b10;Ptms;Qdpr;Cxcl12;Fabp7;Uqcrc1
PPI_Hub_Proteins	YWHAB	12.1833	1.42716e-78	Hdlbp;Arhgap39;Eno1;Rpl8;Clu;Rims1;Chchd3;Dpysl5;Basp1;Dpysl2;Chchd6;Palm;Psmd1;Bsn;Sbf1;Glul;Tpm3;Rps8;Tpm1;Adam11;Ank3;Actn4;Atp1b1;Eef1a1;Bcan;Olfm1;Ccny;Map1a;Eef1a2;Uqcrc1;Vdac3;Suclg1;Lppr4;Atp6v0d1;Stx1a;Gpm6a;Rtn1;Ttyh1;Ntm;Slc1a2;Kalrn;Cacna1e;Slc9a1;Acat1;Atp5b;Dpp6;Epb41l2;Map6;Hspa9;Idh2;Grin2b;Gnao1;Naca;Dlg4;Sfxn1;Aco2;Sfxn5;Ywhab;Ncan;Rplp0;Rasgrf1;Clta;Atp2a2;Arrb1;Ap2a1;Ap2a2;Gph…
PPI_Hub_Proteins	SLC2A4	9.73297	2.53551e-50	Rpl30;Rnh1;Ywhab;Cox4i1;Rplp0;Hdlbp;Clta;Atp2a2;Eno1;Rpl8;Rpl9;Ap2a2;Gls;Opa1;Dpysl2;Dpysl3;Cfl1;Psmd1;Homer3;Phgdh;Nefh;Rps13;Rab2a;Rgd1304704;Arsa;Rps9;Hsp90aa1;Rps7;Rps8;Rps6;Nme2;Rpsa;Eps15l1;Actn4;Dynll1;Sdha;Eef1a1;Mthfd1;Ncl;Map1a;Uqcrc1;Atp6v1b2;Cdh13;Rpl27;Suclg1;Hprt1;Rpl26;Pabpc1;Tkt;Slc25a4;Arf5;Dbn1;Pafah1b1;Rab7a;Plec;Camk2b;Dync1i2;Rtn3;Stoml2;Ahcy;Dlst;Slc3a2;Hsd17b10;Rtn4;Acat1;C…
PPI_Hub_Proteins	DLG4	11.9218	6.06987e-46	Arf1;Ywhab;Ap2a1;Dbi;Eno1;Clu;Sipa1l1;Impa1;Basp1;Cfl1;Nefl;Nefm;Dlgap2;Glul;Sptan1;Hsp90aa1;Kcnd2;Tpm3;Fbxo2;Lancl1;Rpsa;Actn4;Dynll1;Atp1b1;Sdha;Dynll2;Sirt2;Pgm2l1;Tuba4a;Nme1;Cnksr2;Eef1a1;Stx1b;Aldh5a1;Vsnl1;Hgs;Map1a;Uqcrc1;Lancl2;Vdac3;Atp6v1b2;Ndufs2;Lap3;Tkt;Atp6v0d1;Slc25a4;Ina;Camk2b;Gpm6a;Napb;Camk2a;Slc1a2;Slc1a3;Kalrn;Napg;Acat1;Hspd1;Atp5b;Oxct1;Pgk1;Hspa9;Sept11;Slc12a5;Got1;Mog;S…
PPI_Hub_Proteins	GABARAPL1	7.86735	3.4527e-31	Rpl30;Arf1;Ywhab;Rplp0;Eno1;Rpl8;Rpl9;Ipo5;Capzb;Cfl1;Tubb1;Rplp2;Phgdh;Sptan1;Rps13;Eif5a;Rps9;Hsp90aa1;Rps7;Rps8;Anxa4;Rps6;Sdha;Tuba4a;Nme1;Eef1a1;Ilf3;Rcn2;Mthfd1;Ncl;Eef1a2;Rpl27;Hprt1;Srsf5;Pabpc1;Rab7a;Plec;Sec23a;Ahcy;Ralb;Uba5;Hsd17b10;Atp5l;Cnn3;Hspd1;Atp5b;Psmb2;Pgk1;Rpl13;Rpl15;Rps2;Rps27a;Hnrnpa1;Hspa9;Trap1;Sec24b;Mdh2;Ndufa4;Hspa4;Nap1l1;Paics;Gfap;Hnrnpk;Naca;Hnrnpf;Hnrnpd;Rps20
PPI_Hub_Proteins	GABARAPL2	6.35676	3.25236e-24	Rpl30;Rplp0;Eno1;Rpl8;Rpl9;Ipo5;Capzb;Tubb1;Psmd1;Rplp2;Phgdh;Sptan1;Rps13;Rps9;Hsp90aa1;Rps7;Rps8;Rps6;Lancl1;Rangap1;Sdha;Tuba4a;Eef1a1;Ilf3;Rcn2;Pacs1;Ncl;Eef1a2;Rpl27;Hprt1;Srsf5;Pabpc1;Tkt;Rab7a;Sec23a;Uba5;Dlst;Hsd17b10;Acat1;Hspd1;Atp5b;Serpinh1;Rpl13;Rpl15;Rps2;Rps27a;Hnrnpa1;Hspa9;Trap1;Mpp2;St13;Mdh2;Hspa4;Nap1l1;Paics;Lrpprc;Gfap;Hnrnpk;Hnrnpf;Hnrnpd;Rps20
PPI_Hub_Proteins	GABARAP	6.52828	6.74994e-23	Rpl30;Rplp0;Eno1;Rpl8;Rpl9;Gphn;Ipo5;Tubb1;Rplp2;Sptan1;Rps13;Eif5a;Rps9;Hsp90aa1;Rps7;Rps8;Rps6;Sdha;Tuba4a;Eef1a1;Ilf3;Rcn2;Mthfd1;Ncl;Eef1a2;Rpl27;Pkp4;Hprt1;Srsf5;Pabpc1;Sec23a;Ahcy;Uba5;Hsd17b10;Cnn3;Hspd1;Atp5b;Rpl13;Rpl15;Rps2;Rps27a;Hnrnpa1;Hspa9;Trap1;Mpp2;Sec24b;Mdh2;Ndufa4;Hspa4;Nap1l1;Gfap;H1f0;Hnrnpk;Hnrnpf;Hnrnpd;Rps20
PPI_Hub_Proteins	ACTB	7.38914	1.63132e-20	Ywhab;Rplp0;Arpc5l;Arrb1;Eno1;Ppp1r9a;Mllt4;Hspd1;Capzb;Dpysl2;Epb41l2;Tmsb4x;Cfl1;Hnrnpa1;Sptan1;Rps13;Cct5;Rps9;Hsp90aa1;Rps7;Rps8;Tpm3;Anxa4;Tpm1;Rpsa;Actn4;Dynll1;Grin2b;Lrpprc;Gnb2l1;Grin1;Tjp1;Eef1a1;Nfasc;Hnrnpk;Vsnl1;Cttn;Arpc2;Arpc3;Ncl;Vdac3;Hnrnpd;Mapt;Eif3c;Eif3b
PPI_Hub_Proteins	GRIN2B	9.67732	1.81741e-20	Camk2b;Rtn1;Ywhab;Camk2a;Slc1a2;Kalrn;Grm5;Capzb;Dpysl2;Prkar2a;Nefl;Rpl13;Nefm;Mbp;Bsn;Glul;Dlgap2;Rab2a;Mpp2;Mog;Ptpn11;Actn4;Grin2b;Gnb2l1;Grin1;Tjp1;Gap43;Cttn;Arpc2;Arpc3;Dlg4;Aco2;Atp6v0d1;Slc25a4;Ina;Stx1a;Dbn1
PPI_Hub_Proteins	MAP1LC3A	6.77207	4.13321e-20	Sec23a;Ahcy;Rplp0;Clta;Ap2a1;Rpl8;Atp5b;Prkar2a;Tubb1;Cfl1;Rplp2;Rpl13;Phgdh;Rps2;Rps27a;Hnrnpa1;Sptan1;Rps13;Cct5;Hspa9;Eif5a;Trap1;Rps9;Hsp90aa1;Sec24b;Mdh2;Rps8;Hspa4;Ndufa4;Nono;Nap1l1;Sdha;Tuba4a;Nme1;Gfap;Eef1a1;Ilf3;Hnrnpk;Mthfd1;Hnrnpf;Ncl;Map1a;Eef1a2;Hnrnpd;Rps20;Grb2;Pabpc1
PPI_Hub_Proteins	SNCA	6.83056	8.42165e-18	Camk2b;Ndufa11;Ndufb6;Ywhab;Ntm;Camk2a;Slc1a2;Slc1a3;Ap2a1;Slc3a2;Icam5;Chchd3;Nefl;Tppp;Mtnd5;Glul;Sptan1;Hspa9;Rps7;Ndufa5;Ap2b1;Dynll1;Atp5f1;Sod2;Dynll2;Tuba4a;Cox6b1;Eef1a1;Gnao1;Ndufs8;Dlg4;Map1a;Uqcrc1;Vdac3;Atp6v1b2;Ndufs3;Ndufs2;Mapt;Atp6v0d1;Ina;Stx1a
PPI_Hub_Proteins	ARRB2	6.32874	1.32174e-15	Rpl30;Ywhab;Rplp0;Arpc5l;Clta;Ap2a1;Arrb1;Ap2a2;Mllt4;Cfl1;Rpl35;Rplp2;Rpl15;Bsn;Rps27a;Hnrnpa1;Sptan1;Rps13;Rps7;Rps8;Nono;Rps6;Nap1l1;Ap2b1;Sdha;Rangap1;Tuba4a;Eef1a1;Ilf3;Hnrnpk;Cttn;Hnrnpf;Ncl;Eef1a2;Hnrnpd;Rpl26;Pabpc1;Dbn1
PPI_Hub_Proteins	GRB2	3.99426	7.40216e-15	Rpl30;Ap2a1;Eno1;Clu;Ipo7;Rims1;Capzb;Cfl1;Rplp2;Phgdh;Dlgap2;Sptan1;Rps13;Hibch;Rps9;Rps8;Tpm1;Ocrl;Actn4;Dynll1;Tuba4a;Eef1a1;Ilf3;Ddx39b;Cttn;Ncl;Map1a;Rpl27;Rpl26;Pabpc1;Slc25a4;Shank3;Dbn1;Plec;Ddx6;Slc1a2;Dlst;Coro1b;Hspd1;Serpinh1;Ap2s1;Rpl13;Hnrnpa1;Pak2;Nono;Ptpn11;Ap2b1;Grin1;Nfasc;H1f0;Hnrnpk;Arpc2;Arpc3;Dlg4;Hnrnpf;Rpl27a;Grb2;Rps20
PPI_Hub_Proteins	MAP3K14	9.04472	1.36812e-14	Rpl30;Rplp0;Arrb1;Rpl8;Rpl9;Rpl35;Hist1h1e;Rplp2;Rpl13;Rpl15;Rps2;Hnrnpa1;Rps13;Hspa9;Rps9;Hsp90aa1;Rps7;Rps8;Rps6;Tuba4a;Eef1a1;Ncl;Rpl27a;Rpl27;Rps20;Stub1;Pabpc1
PPI_Hub_Proteins	CALM1	5.60847	3.52061e-14	Camk2b;Napb;Rtn3;Ralb;Rogdi;Camk2a;Arpc5l;Arrb1;Camkk1;Add1;Slc9a1;Pcsk1n;Sept6;Grm5;Camkv;Basp1;Dpysl2;Epb41l2;Map6;Sbf1;Sptan1;Sh3gl1;Hsp90aa1;Sept11;Camk1d;Ap2b1;Grin2b;Paics;Sirt2;Grin1;Eef1a1;Gap43;Pacs1;Dlg4;Rps20;Acsbg1;Mapt;Tnik
PPI_Hub_Proteins	MAPK13	9.66012	1.28479e-13	Ahcy;Ywhab;Mdh2;Nono;Pgam1;Eno1;Cacna1e;Paics;Eef1a1;Ilf3;Hnrnpk;Ncl;Pgk1;Hist1h1e;Rplp2;Nefl;Mbp;Phgdh;Nefm;Mapt;Pabpc1;Hnrnpa1;Nefh;Cct5
PPI_Hub_Proteins	MAP1LC3B	5.74542	1.84759e-13	Sec23a;Ahcy;Uba5;Rplp0;Eno1;Rpl8;Hsd17b10;Ipo5;Hspd1;Atp5b;Capzb;Tubb1;Rplp2;Phgdh;Rps27a;Hnrnpa1;Sptan1;Hspa9;Trap1;Rps8;Hspa4;Dynll1;Paics;Tuba4a;Gfap;Eef1a1;Ilf3;Hnrnpk;Hnrnpf;Ncl;Map1a;Eef1a2;Hnrnpd;Rps20;Plec
PPI_Hub_Proteins	EIF2C2	8.8474	1.84759e-13	Stoml2;Rplp0;Rpl8;Hspd1;Rpl35;Rpl15;Rps2;Rps27a;Hnrnpa1;Rps13;Hspa9;Upf1;Rps9;Hsp90aa1;Ndufa4;Rps6;Eef1a1;Ilf3;Prkra;Hnrnpf;Rpl27a;Rpl27;Rps20;Rpl26;Pabpc1
PPI_Hub_Proteins	YWHAZ	4.35658	2.69724e-12	Ahcy;Ywhab;Rplp0;Hdlbp;Nedd4l;Wdr61;Arrb1;Eno1;Ipo7;Mllt4;Hspd1;Atp5b;Cand1;Epb41l2;Cfl1;Tubb1;Pgk1;Psmd1;Rplp2;Rps27a;Hnrnpa1;Sptan1;Hspa9;Upf1;Trap1;Tsfm;Hsp90aa1;Rps7;Hspa4;Pgam1;Lancl1;Mink1;Nme2;Actn4;Grin2b;Lrpprc;Eef1a1;Hnrnpk;Hnrnpf;Ncl;Mapt;Tkt
PPI_Hub_Proteins	HNRNPK	6.75679	9.30394e-11	Hspa9;Eif5a;Rpl30;Arf1;Rps8;Nono;Rpsa;Arrb1;Eno1;Hmgb1;Rpl9;Ndrg1;Acat1;Gfap;Hspd1;Eef1a1;Atp5b;Hnrnpk;Rpl13;Rps20;Grb2;Rps2;Hnrnpa1;Cct5
PPI_Hub_Proteins	IKBKE	4.17244	1.80426e-10	Rock2;Cox4i1;Pdcd5;Dlst;Twf1;Etfb;Atic;Capzb;Psmd1;Rps27a;Sptan1;Cct5;Hspa9;Rps9;Hsp90aa1;St13;Tpm3;Acot13;Nap1l1;Sdha;Atp5f1;Sod2;Lrpprc;Tuba4a;Ktn1;Eef1a1;Rab14;Cops2;Vdac3;Sfxn1;Grb2;Pfdn2;Hprt1;Pabpc1;Tkt;Eif3b;Rab7a
PPI_Hub_Proteins	CSNK1E	6.47786	1.85827e-10	Eif5a;Hsp90aa1;Ywhab;Rock2;Camk2a;Ap2a1;Ndrg1;Rtn4;Nme1;Cnksr2;Rims1;Naca;Prkar2a;Ppp1r1b;Palm;Pgk1;Nefl;Nefm;Bsn;Tkt;Hnrnpa1;Dlgap2;Pak2;Eif3b
PPI_Hub_Proteins	231403	5.20643	1.96915e-10	Sec23a;Ahcy;Psmd13;Pdcd5;Atp5l;Acat1;Hint1;Psmd1;Glul;Trap1;Rps9;Got1;Tpm3;Nap1l1;Sdha;Rangap1;Sod2;Paics;Lrpprc;Mthfd1;Arpc2;Rab14;Psmc1;Vdac3;Suclg1;Sfxn1;Hprt1;Pabpc1;Tkt
PPI_Hub_Proteins	GRIN1	7.53524	2.48451e-10	Camk2b;Ywhab;Fbxo2;Camk2a;Ptpn11;Kalrn;Grin2b;Gnb2l1;Grin1;Tjp1;Grm5;Gap43;Cttn;Dlg4;Prkar2a;Nefl;Grb2;Bsn;Sptan1;Ina;Stx1a
PPI_Hub_Proteins	H2AFX	6.74458	5.53017e-10	Hspa9;Trap1;Hsp90aa1;Ywhab;Nono;Anxa4;Arrb1;Eno1;Sod2;Clu;Hsd17b10;Eef1a1;Naca;Cfl1;Pgk1;Hnrnpd;Rplp2;Pabpc1;Tkt;Hnrnpa1;Hibch;Cct5
PPI_Hub_Proteins	EIF2C1	6.65515	6.68184e-10	Upf1;Rps9;Rps7;Rps8;Rps6;Rplp0;Rpl8;Hspd1;Eef1a1;Ilf3;Ncl;Hnrnpf;Rpl27a;Rpl35;Rpl13;Rpl26;Pabpc1;Rpl15;Rps2;Rps27a;Hnrnpa1;Rps13
PPI_Hub_Proteins	ACTG1	5.4669	6.68184e-10	Camk2b;Camk2a;Arpc5l;Ppp1r9a;Ndrg1;Mllt4;Capzb;Tmsb4x;Cfl1;Kcnd2;Tpm3;Anxa4;Tpm1;Rpsa;Actn4;Dynll1;Tjp1;Hnrnpk;Cttn;Arpc2;Arpc3;Dlg4;Map1a;Grb2;Pfkm;Dbn1
PPI_Hub_Proteins	MAPK14	3.5746	2.63508e-09	Ywhab;Hdlbp;Arrb1;Ppp1r9a;Mllt4;Slc9a1;Rims1;Pclo;Epb41l2;Palm;Psmd1;Nefl;Pip4k2b;Nefm;Mbp;Ncam1;Hnrnpa1;Nefh;Myef2;Mink1;Nme2;Rangap1;Tjp1;Eef1a1;Ilf3;Gap43;Rcn2;Pacs1;Dlg4;Tollip;Ncl;Map1a;Hnrnpd;Pkp4;Stub1;Grb2;Srsf5;Tkt;Eif3b
PPI_Hub_Proteins	PRKCB	4.35266	7.12377e-09	Gsk3a;Ywhab;Camk2a;Ap2a1;Gphn;Add1;Grm5;Mbp;Ncam1;Bsn;Dlgap2;Sptan1;Pak2;Hspa4;Ptpn11;Eps15l1;Rangap1;Grin2b;Gnb2l1;Grin1;Gfap;Tjp1;Eef1a1;Tiam1;Ilf3;Gap43;Ppp1r1b;Pkp4;Mapt
PPI_Hub_Proteins	CDK2	3.21085	7.12377e-09	Crmp1;Ap2a1;Mllt4;Cacna1e;Add1;Slc9a1;Rims1;Atic;Ablim2;Pclo;Dpysl3;Palm;Psmd1;Tnks1bp1;Hist1h1e;Mbp;Ncam1;Tppp;Bsn;Nefh;Dlgap2;Sec24b;Usp5;Rangap1;Paics;Sirt2;Mlf2;Cnksr2;Ilf3;Hnrnpk;Aldh5a1;Mthfd1;Cttn;Ncl;Map1a;Ppp1r1b;Hnrnpd;Pkp4;Pabpc1;Mapt;Tkt;Eif3c;Eif3b
PPI_Hub_Proteins	TRAF6	3.48133	7.70531e-09	Ahcy;Psmd11;Psmd13;Atp2a2;Arrb1;Ap2a1;Ipo7;Acat2;Rtn4;Atic;Psmb2;Capzb;Rpl35;Psmd1;Mbp;Hars;Rps27a;Hspa9;Cyb5a;Rps9;Sept11;St13;Hspa4;Nap1l1;Rangap1;Atp5f1;Paics;Lrpprc;Rcn2;Mthfd1;Arpc2;Tollip;Psmc1;Eef1a2;Hprt1;Pabpc1;Phpt1;Rab7a
PPI_Hub_Proteins	SRRM2	6.271	9.80969e-09	Dync1i2;Rps7;Ywhab;Nono;Arrb1;Sdha;Tuba4a;Hspd1;Eef1a1;Ilf3;Hnrnpf;Psmc1;Eef1a2;Aco2;Rps2;Hnrnpa1;Rps13;Cct5;Plec;Eif3b
PPI_Hub_Proteins	SGK1	7.02022	1.27689e-08	Ddx6;Gsk3a;Ola1;Slc1a3;Nedd4l;Ndrg1;Paics;Camkk1;Gfap;Grm5;Pclo;Ccny;Ppp1r1b;Tnks1bp1;Fam98b;Mapt;Pabpc1;Bsn
PPI_Hub_Proteins	PRKCE	5.59492	2.29231e-08	Ywhab;Ndufa4;Tpm1;Gad2;Acot13;Eno1;Grin2b;Gnb2l1;Grin1;Hspd1;Tjp1;Tiam1;Atp5b;Grm5;Hnrnpk;Chchd3;Capzb;Prkar2a;Hnrnpd;Mapt;Slc25a4
PPI_Hub_Proteins	DNM1	6.91176	4.17847e-08	Sh3glb1;Rtn1;Ywhab;Nme2;Arrb1;Grin2b;Ap2a2;Gnb2l1;Grin1;Capzb;Cttn;Dlg4;Abi1;Pacsin2;Grb2;Aco1;Sh3gl1
PPI_Hub_Proteins	ESR1	3.21629	4.83486e-08	Rnf14;Rplp0;Hmgb1;Rpl8;Rpl9;Hspd1;Atp5b;Capzb;Serpinh1;Psmd1;Rpl13;Ubap2l;Rpl15;Rps2;Hnrnpa1;Sptan1;Rps13;Hspa9;Upf1;Rps9;Hsp90aa1;Rps8;Hspa4;Rps6;Rpsa;Ilf3;Hnrnpk;Hnrnpf;Ncl;Rpl27a;Hnrnpd;Stub1;Grb2;Rps20;Srsf5;Pabpc1;Dbn1;Plec
PPI_Hub_Proteins	MAP3K1	5.57754	5.11744e-08	Hspa9;Rpl30;Rps9;Hsp90aa1;Rps8;Usp9x;Rps6;Arrb1;Tuba4a;Rcn2;Ncl;Eef1a2;Rpl35;Rplp2;Rac3;Rpl13;Grb2;Rps27a;Rps13;Cct5
PPI_Hub_Proteins	ARRB1	4.61853	5.11744e-08	Hspa9;Rtn3;Hsp90aa1;Rps8;Ywhab;Hdlbp;Clta;Ap2a1;Arrb1;Ap2b1;Tuba4a;Ktn1;Atp5b;Hnrnpk;Cttn;Ncl;Cfl1;Eef1a2;Ap2s1;Rps2;Rps27a;Hnrnpa1;Sptan1;Ina
PPI_Hub_Proteins	CDK1	3.029	8.74316e-08	Rab5b;Hmgb1;Mllt4;Add1;Slc9a1;Vcpip1;Grm5;Pclo;Dpysl2;Epb41l2;Palm;Pgk1;Hist1h1e;Mbp;Ubap2l;Phgdh;Ncam1;Hnrnpa1;Nefh;Hspa4;Anxa4;Nme2;Rangap1;Paics;Sirt2;Gfap;Nme1;Tjp1;Hnrnpk;Cacnb4;Cttn;Pacs1;Ncl;Ppp1r1b;Hnrnpd;Pkp4;Stub1;Mapt;Dbn1;Plec
PPI_Hub_Proteins	GSK3B	2.93577	1.28475e-07	Hdlbp;Mllt4;Cacna1e;Rtn4;Gphn;Add1;Slc9a1;Rims1;Grm5;Ablim2;Pclo;Dpysl2;Prkar2a;Dpysl3;Palm;Psmd1;Tnks1bp1;Nefm;Mbp;Ncam1;Tppp;Bsn;Nefh;Dlgap2;Sec24b;Nono;Eps15l1;Grin2b;Grin1;Tjp1;Cacnb4;Cttn;Naca;Hnrnpf;Ncl;Map1a;Ppp1r1b;Hnrnpd;Stub1;Mapt;Eif3b
PPI_Hub_Proteins	TUBB	6.66964	1.54644e-07	Psmd11;Ywhab;Dlst;Arrb1;Dynll1;Gnb2l1;Sirt2;Tjp1;Hgs;Dpysl2;Map1a;Map6;Grb2;Mapt;Chgb;Arl8b
PPI_Hub_Proteins	CAMK2A	5.77683	1.54644e-07	Camk2b;Kcnd2;Ywhab;Rasgrf1;Camk2a;Atp2a2;Actn4;Grin2b;Gfap;Grin1;Qdpr;Rims1;Tiam1;Grm5;Dlg4;Abi1;Nefl;Mapt
PPI_Hub_Proteins	EGFR	3.41408	1.57217e-07	Camk2a;Clta;Atp2a2;Slc3a2;Hspd1;Atp5b;Sh3bgrl;Atic;Snx2;Cfl1;Hist1h1e;Ncam1;Hspa9;Hsp90aa1;Mdh1;Got1;Usp9x;Hspa4;Tpm1;Ptpn11;Fah;Atp1b1;Tuba4a;Tjp1;Eef1a1;Olfm1;Hnrnpk;Hgs;Hnrnpf;Stub1;Grb2;Pabpc1
PPI_Hub_Proteins	ACTA1	5.5789	2.39105e-07	Rps7;Tpm3;Anxa4;Rpsa;Arrb1;Dynll1;Coro2b;Gnb2l1;Tjp1;Cacnb4;Cttn;Epb41l2;Tmsb4x;Cfl1;Map1a;Grb2;Sptan1;Cct5
PPI_Hub_Proteins	SRC	3.19094	4.06277e-07	Rock2;Ywhab;Rasgrf1;Arrb1;Eno1;Mllt4;Napg;Rtn4;Cnn3;Cfl1;Rpl13;Rps27a;Dlgap2;Sptan1;Pak2;Sh3gl1;Sh3glb1;Hsp90aa1;Ptpn11;Ap2b1;Grin2b;Gnb2l1;Gfap;Grin1;Tiam1;Hnrnpk;Cttn;Dlg4;Grb2;Coro7;Mapt;Slc25a4;Shank3
PPI_Hub_Proteins	PRKACB	5.2546	5.21078e-07	Apool;Ywhab;Nme2;Grin2b;Mllt4;Camkk1;Grin1;Qdpr;Cnksr2;Tiam1;Hnrnpk;Pclo;Prkar2a;Nefl;Mbp;Tppp;Mapt;Dlgap2
PPI_Hub_Proteins	TNIK	6.41575	5.83439e-07	Got1;Psmd13;Pdcd5;Sod2;Clu;Acat2;Slc9a1;Acat1;Cnksr2;Mthfd1;Psmc1;Psmd1;Nefm;Tnik;Hars
PPI_Hub_Proteins	APP	4.24622	1.22619e-06	Gsk3a;Hsp90aa1;Hspa4;Ywhab;Pgam1;Clu;Hsd17b10;Gfap;Nfasc;Rcn2;Hgs;Nefl;Cpe;Homer3;Grb2;Mbp;Ncam1;Mapt;Agrn;Sptan1;Stx1a
PPI_Hub_Proteins	MCC	3.91704	1.24344e-06	Rab2a;Tsfm;Stoml2;Ahcy;Tpm3;Psmd13;Pdcd5;Acot13;Sod2;Paics;Lrpprc;Acat2;Acat1;Mthfd1;Capzb;Ap2s1;Sfxn1;Grb2;Pfdn2;Hprt1;Tkt;Pfkm;Rab7a
PPI_Hub_Proteins	MAP3K3	4.40912	1.30168e-06	Hspa9;Hsp90aa1;St13;Hspa4;Ywhab;Actn4;Tuba4a;Eef1a1;Capzb;Eef1a2;Phgdh;Pfdn2;Stub1;Sugt1;Rps27a;Sptan1;Pak2;Dbn1;Cct5;Pfdn6
PPI_Hub_Proteins	SMAD2	3.47385	1.79403e-06	Rpl30;Psmd11;Camk2a;Nedd4l;Clta;Rpl9;Mllt4;Ptms;Hspd1;Rims1;Opa1;Nefm;Rps27a;Chgb;Gripap1;St13;Usp9x;Nap1l1;Ank3;Atp1b1;Tuba4a;Gfap;Eef1a1;Hgs;Stub1;Srsf5
PPI_Hub_Proteins	RPS6KA3	3.42319	2.2791e-06	Gsk3a;Ywhab;Atp2a2;Gphn;Add1;Slc9a1;Vcpip1;Pclo;Epb41l2;Prkar2a;Tnks1bp1;Mbp;Bsn;Dlgap2;Pak2;Sec24b;Camk1d;Rps6;Grin2b;Grin1;Dlg4;Map1a;Pkp4;Aco1;Mapt;Pfkm
PPI_Hub_Proteins	HSP90AB1	5.52419	2.95181e-06	Hsp90aa1;Mdh1;Tpm3;Ywhab;Rps6;Rplp0;Rpsa;Mthfd1;Dlg4;Pgk1;Psmd1;Grb2;Stub1;Hnrnpa1;Sptan1
PPI_Hub_Proteins	CSNK2A1	2.87675	2.99303e-06	Rtn1;Anp32a;Rock2;Ywhab;Rplp0;Pdcd5;Arrb1;Slc3a2;Mllt4;Acat2;Epb41l2;Prkar2a;Nefl;Tnks1bp1;Rplp2;Hnrnpa1;Bsn;Dlgap2;Sptan1;Hsp90aa1;Kcnd2;Rangap1;Nme1;Ilf3;Gap43;Hnrnpk;Pacs1;Ncl;Map1a;Ppp1r1b;Stx1a;Pafah1b1;Eif3b
PPI_Hub_Proteins	CSNK2A2	3.76625	3.67019e-06	Hsp90aa1;Anp32a;Tpm3;Rplp0;Pdcd5;Hdlbp;Ppp1r9a;Rtn4;Add1;Gap43;Nfasc;Pclo;Pacs1;Naca;Prkar2a;Ncl;Ppp1r1b;Rplp2;Nefl;Nefm;Eif3c;Stx1a
PPI_Hub_Proteins	IL7R	5.60202	5.68431e-06	Tpm3;Ywhab;Rpsa;Eno1;Sod2;Tuba4a;Hspd1;Atp5b;Sh3bgrl;Capzb;Tubb1;Cfl1;Grb2;Cct5
PPI_Hub_Proteins	YWHAG	3.0929	7.80216e-06	Gsk3a;Ywhab;Hdlbp;Nedd4l;Arrb1;Mllt4;Ndrg1;Camkk1;Hspd1;Atp5b;Epb41l2;Cfl1;Nefl;Phgdh;Rps2;Rps27a;Hspa9;Baiap2;Grin2b;Tuba4a;Grin1;Eef1a1;Tiam1;Rabep1;Ccny;Dlg4;Pabpc1
PPI_Hub_Proteins	MDM2	4.28561	1.23919e-05	Hsp90aa1;Rps7;Rasgrf1;Arrb1;Nap1l1;Baiap2;Clu;Eef1a1;Rcn2;Rpl27a;Ncl;Rps20;Nefm;Rpl26;Rps27a;Stx1a;Pfdn6
PPI_Hub_Proteins	MYC	2.8439	1.51424e-05	Arf1;Gsk3a;Rnh1;Ywhab;Atp2a2;Ap2a1;Ipo7;Hspd1;Opa1;Ap2s1;Rps27a;Pak2;Cct5;Hsp90aa1;Ndufa5;Usp9x;Nono;Nap1l1;Lrpprc;Tuba4a;Tiam1;Hnrnpk;Hnrnpf;Psmc1;Ncl;Ndufs3;Ndufs2;Suclg1;Aldh18a1
PPI_Hub_Proteins	EIF1B	4.71348	1.58682e-05	Rps9;Ahcy;Tpm3;Psmd13;Pdcd5;Sod2;Paics;Acat2;Acat1;Rpl35;Pfdn2;Rpl26;Hprt1;Tkt;Rab7a
PPI_Hub_Proteins	NFKB2	4.3142	2.12493e-05	Hspa9;Rpl30;Hsp90aa1;Psmd11;Rps8;Psmd13;Usp9x;Ncl;Psmc1;Eef1a2;Psmd1;Rplp2;Rpl13;Pabpc1;Rps27a;Rps13
PPI_Hub_Proteins	CDK5	4.79098	2.72058e-05	Rasgrf2;Rasgrf1;Crmp1;Kalrn;Sipa1l1;Dpysl2;Dpysl3;Ppp1r1b;Nefl;Nefm;Tppp;Mapt;Nefh;Stx1a
PPI_Hub_Proteins	PRKACA	2.87597	3.62483e-05	Rab5b;Gsk3a;Rasgrf1;Nedd4l;Ppp1r9a;Ndrg1;Camkk1;Add1;Hspd1;Sec14l2;Rims1;Chchd3;Dpysl2;Nefl;Nefm;Mbp;Tppp;Hsp90aa1;Kcnd2;Gad2;Gfap;Grin1;Ppp1r1b;Hnrnpd;Mapt;Dbn1
PPI_Hub_Proteins	YWHAE	3.89239	3.65872e-05	Hsp90aa1;Stoml2;Rps8;Ywhab;Rplp0;Rasgrf1;Hdlbp;Arrb1;Grin2b;Grin1;Atp5b;Prpsap2;Rcn2;Dlg4;Eef1a2;Pgk1;Tkt
PPI_Hub_Proteins	EPB41	4.3203	3.85744e-05	Rab2a;Ywhab;Tpm1;Ptpn11;Dynll1;Paics;Tuba4a;Lrpprc;Atp5l;Fkbp1a;Tjp1;Nefl;Hprt1;Sptan1;Ina
PPI_Hub_Proteins	PRKCD	4.29273	4.07565e-05	Gsk3a;Hsp90aa1;Ywhab;Rps6;Gnb2l1;Add1;Eef1a1;Pdp1;Tjp1;Tiam1;Grm5;Gap43;Hnrnpk;Mbp;Mapt
PPI_Hub_Proteins	PRKDC	3.29505	5.88576e-05	Hsp90aa1;Ywhab;Rps6;Hdlbp;Atp2a2;Hmgb1;Mllt4;Gfap;Rims1;Ilf3;Gap43;Dlg4;Tnks1bp1;Grb2;Mbp;Mapt;Bsn;Eif3c;Sptan1;Ina
PPI_Hub_Proteins	CLTC	5.00206	7.66256e-05	Hgs;Dlg4;Ywhab;Dnajc6;Clta;Ocrl;Arrb1;Ap2b1;Ndrg1;Grin2b;Ap2a2;Grin1
PPI_Hub_Proteins	HSPA8	4.03513	7.66256e-05	Hsp90aa1;St13;Ywhab;Clta;Arrb1;Dynll1;Hnrnpk;Hgs;Dlg4;Abi1;Pacsin2;Hnrnpd;Grb2;Stub1;Mapt
PPI_Hub_Proteins	NR3C1	3.75052	9.29537e-05	Hsp90aa1;Anp32a;Rnf14;Nedd4l;Hmgb1;Atp1b1;Clu;Ptms;Ktn1;Hspd1;Aldh5a1;Epb41l2;Ncl;Stub1;Srsf5;Slc25a4
PPI_Hub_Proteins	GC20	4.18404	9.68189e-05	Rps9;Ahcy;Tpm3;Psmd13;Pdcd5;Sod2;Paics;Acat2;Acat1;Rpl35;Pfdn2;Rpl26;Hprt1;Tkt
PPI_Hub_Proteins	RAF1	4.1563	0.000102174	Hsp90aa1;Hspa4;Ywhab;Rock2;Camk2a;Arrb1;Grin2b;Hspd1;Grin1;Eef1a1;Cnksr2;Hnrnpk;Stub1;Pak2
PPI_Hub_Proteins	CALM3	3.99723	0.000149833	Camk2b;Hsp90aa1;Ralb;Rasgrf1;Mink1;Camk2a;Clta;Add1;Grin1;Grm5;Gap43;Map1a;Tnik;Mapt
PPI_Hub_Proteins	VIM	3.68121	0.000190887	Rock2;Camk2a;Nme2;Crmp1;Arrb1;Dynll1;Rad23b;Gfap;Tjp1;Nefl;Mapt;Sptan1;Pak2;Stx1a;Plec
PPI_Hub_Proteins	PRKAB1	3.49433	0.000191492	Rps9;Usp5;St13;Cisd1;Rangap1;Camkk1;Acat2;Rtn4;Psmd1;Grb2;Pfdn2;Fam98b;Hprt1;Pabpc1;Rps27a;Rab7a
PPI_Hub_Proteins	DYNLL1	3.73494	0.000284122	Dync1i2;Mdh1;Mdh2;Dynll1;Dynll2;Gnb2l1;Gphn;Eef1a1;Dlg4;Prkar2a;Grb2;Pabpc1;Glul;Pfkm
PPI_Hub_Proteins	MEPCE	3.85047	0.00037314	Rps9;Anp32a;Rplp0;Rangap1;Ipo5;Ilf3;Hnrnpk;Cand1;Capzb;Hnrnpd;Phgdh;Rps2;Hnrnpa1
PPI_Hub_Proteins	SQSTM1	3.85047	0.00037314	Sh3glb1;Camk2b;Ndufa5;Camk2a;Dlg4;Ndufs2;Mbp;Nefm;Mapt;Tkt;Rps27a;Ina;Plec
PPI_Hub_Proteins	PRKCA	2.37028	0.000446509	Gpm6a;Gsk3a;Ralb;Ywhab;Icam5;Hmgb1;Coro1b;Add1;Grm5;Palm;Mbp;Rps27a;Hsp90aa1;Rps6;Ptpn11;Grin2b;Gnb2l1;Gfap;Tjp1;Tiam1;Nfasc;Gap43;Dlg4;Ncl;Aco1;Mapt;Dbn1
PPI_Hub_Proteins	TNFRSF1A	3.65644	0.00058705	Hspa9;Trap1;Hsp90aa1;Atp2a2;Ptpn11;Nap1l1;Gnb2l1;Slc9a1;Afg3l2;Rcn2;Pip4k2b;Grb2;Rps27a
PPI_Hub_Proteins	RAC1	3.10024	0.000649469	Nono;Rasgrf1;Ocrl;Baiap2;Kalrn;Grin2b;Tuba4a;Nme1;Ktn1;Grin1;Tiam1;Ablim2;Cttn;Dlg4;Epb41l2;Pak2
PPI_Hub_Proteins	YWHAH	3.56652	0.000719222	Ywhab;Rasgrf1;Arrb1;Baiap2;Grin2b;Mllt4;Camkk1;Rims1;Tiam1;Rabep1;Epb41l2;Cfl1;Hnrnpd
PPI_Hub_Proteins	UBC	2.30434	0.000842402	Ywhab;Rasgrf2;Rasgrf1;Nedd4l;Dlst;Arrb1;Ap2a1;Hmgb1;Rps2;Rps27a;Pak2;Hsp90aa1;Usp5;Hspa4;Eps15l1;Atp1b1;Grin2b;Eef1a1;Hnrnpk;Abi2;Hgs;Tollip;Hnrnpd;Stub1;Grb2;Mapt
PPI_Hub_Proteins	MAPK1	2.47208	0.00131929	Hsp90aa1;Kcnd2;Rock2;Arrb1;Grin2b;Slc9a1;Grin1;Pclo;Cttn;Dlg4;Abi1;Nefl;Tnks1bp1;Nefm;Mbp;Grb2;Tnik;Tppp;Mapt;Nefh;Pak2
PPI_Hub_Proteins	PPP2R1A	3.65462	0.00174368	Hsp90aa1;Psmb2;Dlg4;Ywhab;Nme2;Tnik;Dynll1;Grin2b;Rab7a;Hspd1;Grin1
PPI_Hub_Proteins	IKBKG	2.58931	0.00195953	Hspa9;Hsp90aa1;Psmd13;Hspa4;Rplp0;Ipo7;Lrpprc;Gnb2l1;Hspd1;Eef1a1;Atp5b;H1f0;Eef1a2;Rplp2;Sfxn1;Rps20;Rps27a;Dbn1
PPI_Hub_Proteins	ESR2	2.51163	0.00196272	Rps9;Rps7;Rplp0;Rps6;Ap2a1;Eps15l1;Gnb2l1;Gfap;Cttn;Arpc2;Prkra;Eef1a2;Serpinh1;Psmd1;Srsf5;Rps27a;Nefh;Rps13;Dbn1
PPI_Hub_Proteins	CTNNB1	2.54806	0.00228125	Gsk3a;Anp32a;Usp9x;Ywhab;Nono;Clta;Ptpn11;Actn4;Grin2b;Ndrg1;Ermn;Tuba4a;Grin1;Hspd1;Tjp1;Hint1;Rplp2;Hnrnpa1
PPI_Hub_Proteins	ITGB1	3.76351	0.00240773	Vcan;Ywhab;Fbxo2;Camk2a;Nme2;Slc3a2;Actn4;Gnb2l1;Nme1;Hspd1
PPI_Hub_Proteins	FYN	2.30682	0.00284098	Hsp90aa1;Hspa4;Ywhab;Crmp1;Ptpn11;Dynll1;Grin2b;Tuba4a;Rtn4;Gnb2l1;Cnn3;Rims1;Nfasc;Hnrnpk;Dlg4;Grb2;Ncam1;Mapt;Dlgap2;Pak2;Shank3
PPI_Hub_Proteins	PRKCZ	3.40083	0.00284098	Tiam1;Gsk3a;Grm5;Hsp90aa1;Ywhab;Ncl;Prkar2a;Mbp;Mapt;Hnrnpa1;Add1
PPI_Hub_Proteins	CHUK	3.37736	0.00294626	Eef1a1;Hspa9;Hsp90aa1;Ddx39b;Tpm3;Prkra;Eef1a2;Arrb1;Ptpn11;Tuba4a;Hspd1
PPI_Hub_Proteins	MAPK10	3.16765	0.00294626	Grm5;Hnrnpk;Rac3;Arrb1;Nap1l1;Eps15l1;Grin2b;Rtn4;Add1;Slc9a1;Gfap;Grin1
PPI_Hub_Proteins	PPP1CA	3.13049	0.00320733	Camk2b;Hspa4;Ywhab;Rock2;Cfl1;Ppp1r1b;Camk2a;Nefl;Mapt;Ppp1r9a;Pfkm;Pafah1b1
PPI_Hub_Proteins	ABL1	2.43916	0.00337532	Hsp90aa1;Hspa4;Ywhab;Ptpn11;Rtn4;Gnb2l1;Rims1;Nfasc;Cttn;Abi2;Abi1;Grb2;Pkp4;Mapt;Dlgap2;Sptan1;Pak2;Shank3
PPI_Hub_Proteins	SUMO2	3.26469	0.00367258	Eef1a1;Hspa9;Psmd11;Hnrnpk;Uba5;Hnrnpf;Eno1;Rangap1;Kalrn;Pfkm;Ipo5
PPI_Hub_Proteins	VCL	3.59187	0.00546465	Eef1a1;Atp5b;Abi2;Nono;Serpinh1;Rpsa;Actn4;Coro2b;Gnb2l1
PPI_Hub_Proteins	TNFRSF1B	3.49763	0.00641033	Hspa9;Rcn2;Eef1a2;Slc1a3;Atp2a2;Phgdh;Rps27a;Ipo7;Slc25a4
PPI_Hub_Proteins	VHL	2.41586	0.00652132	Rab2a;Rps9;Psmd13;Pdcd5;Atp5f1;Sod2;Gnb2l1;Fkbp1a;Hint1;Atic;Rab14;Rpl35;Pfdn2;Hprt1;Tkt;Rab7a
PPI_Hub_Proteins	PIK3CA	3.4673	0.00663861	Hsp90aa1;Ywhab;Tpm1;Rac3;Rps20;Grb2;Ptpn11;Grin2b;Grin1
PPI_Hub_Proteins	CDH1	3.40818	0.00732897	Tjp1;Hsp90aa1;Arpc2;Usp9x;Pkp4;Actn4;Ndrg1;Stx1a;Hspd1
PPI_Hub_Proteins	BTK	3.37937	0.00765595	Afg3l2;Atp5b;Eef1a2;Twf1;Pip4k2b;Grb2;Glul;Tuba4a;Dbn1
PPI_Hub_Proteins	MAPK3	2.32089	0.00906707	Hsp90aa1;Kcnd2;Rock2;Arrb1;Ptpn11;Grin2b;Grin1;Hnrnpk;Cttn;Dlg4;Abi1;Mbp;Mapt;Bsn;Pak2;Pfkm
PPI_Hub_Proteins	IRS1	3.04226	0.00906707	H1f0;Cand1;Ywhab;Rock2;Rplp0;Atp2a2;Grb2;Ptpn11;Grin2b;Grin1
PPI_Hub_Proteins	NFKBIA	3.21617	0.0101343	Hspa9;Hspa4;Rock2;Cops2;Arrb1;Dynll1;Rps27a;Hnrnpa1;Slc25a4
PPI_Hub_Proteins	PLCG1	2.52333	0.0108032	Sec24b;Camk2a;Ptpn11;Grin2b;Gnb2l1;Grin1;Eef1a1;Rpl13;Grb2;Mapt;Ppfia4;Shank3;Stx1a
PPI_Hub_Proteins	MAPK9	2.55899	0.0134952	Sec24b;Cttn;Ppp1r1b;Rac3;Tnks1bp1;Crmp1;Grb2;Eps15l1;Mapt;Tppp;Add1;Slc9a1
PPI_Hub_Proteins	MAP3K7	2.82885	0.0141489	Eef1a1;Hspa9;Hsp90aa1;Hgs;Rplp0;Camk2a;Eno1;Rps27a;Tuba4a;Slc9a1
PPI_Hub_Proteins	IKBKB	2.81091	0.0146133	Eef1a1;Hspa9;Hsp90aa1;Ywhab;Nme2;Arrb1;Ptpn11;Tuba4a;Gnb2l1;Hspd1
PPI_Hub_Proteins	HSPA5	3.1571	0.0176093	Dpysl5;Dlg4;Ywhab;Grb2;Arrb1;Ndrg1;Pak2;Hspd1
PPI_Hub_Proteins	INSR	2.57566	0.0176093	Arf1;Snx2;Cttn;Hspa4;Ywhab;Epb41l2;Tnks1bp1;Grb2;Ptpn11;Baiap2;Gnb2l1
PPI_Hub_Proteins	ERBB2	2.70786	0.0181129	Hsp90aa1;Sh3bgrl;Sec24b;Hspa4;Dlg4;Camk2a;Grb2;Ptpn11;Stub1;Rab7a
PPI_Hub_Proteins	PAK1	2.69141	0.0186676	Hsp90aa1;Cttn;Hgs;Pgam1;Rac3;Mbp;Grb2;Dynll1;Baiap2;Pak2
PPI_Hub_Proteins	EEF1G	3.07498	0.0197925	Arf1;Psmd11;Dlg4;Ywhab;Pdcd5;Grb2;Hars;Ndrg1
PPI_Hub_Proteins	PPP2CA	2.56661	0.0247894	Ywhab;Pacs1;Cfl1;Nme2;Nefl;Mapt;Dynll1;Grin2b;Cct5;Grin1
PPI_Hub_Proteins	RIF1	2.71314	0.0255362	Psmd11;Naca;Hnrnpf;Tmsb4x;Pdcd5;Cpe;Grb2;Hmgb1;Atp1b1
PPI_Hub_Proteins	IGF1R	2.40991	0.0261867	Gnao1;Cttn;Ywhab;Grb2;Arrb1;Ptpn11;Tkt;Baiap2;Napg;Gnb2l1;Hspd1
PPI_Hub_Proteins	SMURF1	2.89893	0.0263018	Fkbp1a;Gripap1;Rnf14;Wdr61;Stub1;Srsf5;Ap2b1;Rps27a
PPI_Hub_Proteins	TGFBR1	2.39803	0.0266018	Fkbp1a;Eef1a1;Trap1;Hsp90aa1;Wdr61;Stub1;Ap2b1;Rps27a;Wdr13;Clu;Arl8b
PPI_Hub_Proteins	ARF6	2.60663	0.0311056	Mthfd1;Hdlbp;Arrb1;Pfdn2;Slc3a2;Exoc5;Sod2;Lrpprc;Gls
PPI_Hub_Proteins	TSGA14	2.76325	0.0330746	Ddx6;Upf1;Kif3b;Mink1;Rpsa;Fam98b;Rangap1;Pafah1b1
PPI_Hub_Proteins	ATXN1	2.42587	0.0331199	Myef2;Anp32a;Vsnl1;Tollip;Cfl1;Ubap2l;Mbp;Stub1;Atp6v0d1;Phpt1
PPI_Hub_Proteins	AKT1	1.97614	0.0380513	Gsk3a;Hsp90aa1;Hspa4;Rps6;Nedd4l;Arrb1;Camkk1;Ktn1;Slc9a1;Ilf3;Them4;Stub1;Mapt;Hnrnpa1;Dlgap2
PPI_Hub_Proteins	UBA1	2.62008	0.042558	Hgs;Naca;Dlg4;Pgk1;Nedd4l;Stub1;Tkt;Adh5
PPI_Hub_Proteins	HSPA1A	2.60082	0.0438454	Hsp90aa1;St13;Ywhab;Pacsin2;Arrb1;Stub1;Cacna1e;Grin1
PPI_Hub_Proteins	TP53	1.76537	0.0478129	Hspa9;Hsp90aa1;Gsk3a;Psmd11;Rps7;Hspa4;Rasgrf1;Nap1l1;Hmgb1;Adh5;Lrpprc;Prkra;Tmsb4x;Ncl;Cops2;Serpinh1;Stub1;Rps27a;Cct5

## Sheet: sheet_9
pathway	description	enrichment_ratio	fdr	features
MSigDB_Hallmark_2020	Oxidative Phosphorylation	9.06412	2.35058e-11	Hspa9;Pdhx;Pdha1;Maob;Mdh1;Mdh2;Ndufb5;Ndufa4;Cox4i1;Dlst;Hsd17b10;Lrpprc;Acat1;Pdp1;Aldh6a1;Ndufs8;Opa1;Uqcrc1;Ndufs2;Suclg1;Slc25a5
MSigDB_Hallmark_2020	Fatty Acid Metabolism	5.5707	0.000261013	Cbr1;Hsp90aa1;Pdha1;Auh;Mdh1;Mdh2;Dlst;Suclg1;Acads;Hsd17b10;Hibch
MSigDB_Hallmark_2020	Glycolysis	4.32348	0.00151503	Tsta3;Vcan;Pc;Mdh1;Got1;Mdh2;Pgam1;Agrn;Ppfia4;Ppia;Pfkp
MSigDB_Hallmark_2020	Protein Secretion	5.78458	0.00389393	Rab2a;Arf1;Snx2;Rab14;Ap2s1;Ap2b1;Napg
MSigDB_Hallmark_2020	Adipogenesis	3.89474	0.00399543	Qdpr;Acly;Mdh2;Uqcrc1;Suclg1;Tkt;Fah;Acads;Gphn;Hibch
MSigDB_Hallmark_2020	PI3K/AKT/mTOR Signaling	4.43849	0.0238317	Actr2;Arf1;Arpc3;Prkar2a;Them4;Ptpn11
MSigDB_Hallmark_2020	Reactive Oxygen Species Pathway	6.47934	0.0282913	Ndufs2;Mbp;Sod2;Pfkp
MSigDB_Hallmark_2020	Apical Junction	3.05984	0.0284592	Tjp1;Vcan;Nfasc;Arpc2;Epb41l2;Icam5;Thy1;Baiap2
MSigDB_Hallmark_2020	mTORC1 Signaling	3.05984	0.0284592	Hspa9;Qdpr;Acly;Actr2;Got1;Phgdh;Ppia;Tuba4a
MSigDB_Hallmark_2020	Epithelial Mesenchymal Transition	3.05984	0.0284592	Vcan;Cxcl12;Basp1;Ntm;Dpysl3;Tpm1;Thy1;Fermt2
Aging_Perturbations_from_GEO_up	Rat hippocampus CA1 18 months vs 28 months GSE21681 aging:354	8.64612	2.28538e-17	Maob;Rplp0;Hpca;Rasgrf1;Icam5;Thy1;Ptms;Camkv;Basp1;Tmsb4x;Rpl35;Sh3bgrl3;Rpl19;Bcas1;Got1;Arpc4;Ap2b1;Dynll1;Mt3;Coro2b;Mlf2;Gfap;Qdpr;Uqcrc1;Ndufs2;Scg3;Eif3f;Phpt1;Nptxr;Ina;Shank3;Sfxn5;Dbn1;Gstm5
Aging_Perturbations_from_GEO_up	Rat hippocampus CA3 18 months vs 28 months GSE21681 aging:356	8.30018	2.28538e-17	Maob;Rplp0;Hpca;Cisd1;Icam5;Thy1;Camkk1;Rgd1307929;Ptms;Camkv;Basp1;Tmsb4x;Ap2s1;Rpl35;Sh3bgrl3;Pip5k1c;Got1;Prkce;Arpc4;Ap2b1;Dynll1;Hpcal4;Mt3;Coro2b;Tuba4a;Mlf2;Gfap;Bcan;Eef1a2;Uqcrc1;Ndufs2;Eif3f;Phpt1;Shank3;Sfxn5
Aging_Perturbations_from_GEO_up	Rat hippocampus CA3 18 months vs 28 months GSE21681 aging:355	8.36417	3.49056e-16	Rplp0;Hpca;Icam5;Thy1;Camkk1;Rgd1307929;Camkv;Tmsb4x;Flot1;Rpl35;Sh3bgrl3;Bcas1;Slc6a17;Got1;Mdh2;Prkce;Fn3krp;Dynll1;Hpcal4;Mt3;Coro2b;Tuba4a;Mlf2;Gfap;Pcp4;Uqcrc1;Ndufs2;Srsf5;Eif3f;Phpt1;Shank3;Sfxn5
Aging_Perturbations_from_GEO_up	Rat frontalcortex 4 months vs 22 months GDS3939 aging:99	9.45095	4.71027e-16	Dync1i2;Rpl30;Maob;Adpgk;Rnf14;Cox4i1;Rplp0;Hpca;Ndrg1;Camkk1;Sept7;Tmsb4x;Rpl35;Mbp;Rpl15;Nefh;Rpl19;Bcas1;Mdh1;Mog;Rps6;Rpsa;Ptpn11;Ermn;Gfap;Qdpr;Rpl27a;Etl4;Mapt
Aging_Perturbations_from_GEO_up	Rat hippocampus dentate gyrus 18 months vs 28 months GSE21681 aging:358	8.37407	6.61579e-16	Ndufb5;Rplp0;Rogdi;Hpca;Cisd1;Icam5;Thy1;Camkk1;Ptms;Basp1;Tmsb4x;Rpl35;Sh3bgrl3;Rpl19;Bcas1;Slc6a17;Got1;Arpc4;Mt3;Coro2b;Tuba4a;Mlf2;Gfap;Qdpr;Pcp4;Eef1a2;Uqcrc1;Srsf5;Phpt1;Shank3;Dbn1
Aging_Perturbations_from_GEO_up	Rat thoracicaorta 3 months vs 6 months GDS3077 aging:119	6.93659	2.10571e-14	Vps29;Rpl30;Arf1;Loc100363469;Ndufb5;Cox4i1;Rpl9;Acat1;Auh;Tmsb4x;Rpl35;Rpl15;Rps9;Hsp90aa1;Mdh1;Mdh2;Ndufa4;Pgam1;Tpm1;Rps6;Rpsa;Sod2;Tjp1;Qdpr;Acly;H1f0;Rpl27a;Hnrnpf;Suclg1;Slc25a5;Ppia;Gstm5
Aging_Perturbations_from_GEO_up	Rat hippocampus dentate gyrus 18 months vs 28 months GSE21681 aging:357	6.90699	1.42455e-13	Ddx6;Ndufb5;Rplp0;Cisd1;Icam5;Thy1;Hsd17b10;Tmsb4x;Rpl35;Sh3bgrl3;Rpl19;Bcas1;Got1;Arpc4;Ap2b1;Mt3;Coro2b;Mlf2;Gfap;Qdpr;Pcp4;Uqcrc1;Cdh13;Ndufs2;Eif3f;Phpt1;Shank3;Sfxn5;Dbn1;Gstm5
Aging_Perturbations_from_GEO_up	Rat hippocampus CA1 18 months vs 28 months GSE21681 aging:353	7.32073	2.26341e-13	Rplp0;Hpca;Rasgrf1;Icam5;Thy1;Ptms;Basp1;Tmsb4x;Rpl35;Sh3bgrl3;Pip5k1c;Rpl19;Bcas1;Got1;Arpc4;Ap2b1;Dynll1;Mt3;Coro2b;Mlf2;Gfap;Qdpr;Uqcrc1;Scg3;Eif3f;Phpt1;Shank3;Sfxn5
Aging_Perturbations_from_GEO_up	Rat femur 12 weeks vs 58 weeks GDS509 aging:267	5.45422	4.41511e-11	Lrrc59;Rpl30;Arf1;Loc100363469;Rplp0;Gdi2;Thy1;Rpl9;Ptms;Acan;Tmsb4x;Ap2s1;Flot1;Rpl35;Rpl15;Rpl19;Rps9;Pdha1;Mdh2;Pgam1;Arpc4;Dynll1;Paics;Mt3;Tjp1;Dlg4;Rpl27a;Eef1a2;Slc25a5
Aging_Perturbations_from_GEO_up	Rat femur 7 weeks vs 53 weeks GDS509 aging:264	5.84727	4.88796e-11	Lrrc59;Arf1;Loc100363469;Rplp0;Gdi2;Twf1;Thy1;Acan;Basp1;Tmsb4x;Ap2s1;Rpl35;Rpl15;Rpl19;Hsp90aa1;Tpm3;Pgam1;Rpsa;Arpc4;Dynll1;Paics;Tuba4a;Vcan;Rpl27a;Ppia;Dbn1;Plec
Aging_Perturbations_from_GEO_up	Rat femur 12 weeks vs 32 weeks GDS509 aging:261	5.94209	8.03692e-11	Lrrc59;Arf1;Loc100363469;Cox4i1;Rplp0;Gdi2;Atp5b;Acan;Tmsb4x;Ap2s1;Rpl35;Rpl15;Rpl19;Rps9;Mdh2;Pgam1;Rpsa;Arpc4;Sod2;Mt3;Tuba4a;Tjp1;Eef1a2;Atp6v1b2;Slc25a5;Pfkm
Aging_Perturbations_from_GEO_up	Rat femur 27 weeks vs 53 weeks GDS509 aging:270	5.65615	9.25601e-11	Lrrc59;Arf1;Rplp0;Gdi2;Twf1;Thy1;Rpl9;Hapln1;Ptms;Acan;Basp1;Tmsb4x;Ap2s1;Flot1;Rpl35;Rpl15;Rpl19;Mapk3;Tpm3;Pgam1;Rpsa;Arpc4;Paics;Dlg4;Rpl27a;Dbn1;Plec
Aging_Perturbations_from_GEO_up	Rat femur 28 weeks vs 54 weeks GDS509 aging:271	5.68801	1.84357e-10	Lrrc59;Arf1;Loc100363469;Rplp0;Gdi2;Thy1;Hmgb1;Rpl9;Acan;Tmsb4x;Rpl35;Rpl15;Rpl19;Rps9;Pgam1;Rps6;Arpc4;Dynll1;Paics;Nme1;Rpl27a;Atp6v1b2;Slc25a5;Ppia;Dbn1;Plec
Aging_Perturbations_from_GEO_up	Rat femur 30 weeks vs 56 weeks GDS509 aging:272	5.14434	2.959e-10	Vps29;Rpl30;Arf1;Rplp0;Gdi2;Hmgb1;Rpl9;Atp5b;Acan;Auh;Tmsb4x;Flot1;Rpl35;Rpl15;Rpl19;Rps9;Pgam1;Rpsa;Arpc4;Dynll1;Paics;Mt3;Tjp1;H1f0;Rpl27a;Srsf5;Agrn;Plec
Aging_Perturbations_from_GEO_up	Rat whiteadipose 4 months vs 28 months GDS3102 aging:126	6.24399	1.01384e-09	Actr2;Rpl30;Rps9;Rplp0;Rps6;Rpsa;Rpl9;Ndrg1;Tjp1;Cxcl12;Sept7;Arpc2;Rab14;Oxct1;Rpl27a;Tmsb4x;Rpl35;Rpl15;Srsf5;Eif3f;Slc25a5;Rpl19
Aging_Perturbations_from_GEO_up	Rat femur 26 weeks vs 52 weeks GDS509 aging:268	5.00036	1.07247e-09	Vps29;Arf1;Loc100363469;Rplp0;Rpl9;Add1;Auh;Tmsb4x;Rpl35;Rpl15;Rpl19;Mapk3;Rps9;Hsp90aa1;Tpm3;Pgam1;Rps6;Rpsa;Arpc4;Paics;Tuba4a;Rpl27a;Hnrnpf;Srsf5;Tkt;Slc25a5;Ppia
Aging_Perturbations_from_GEO_up	Rat femur 6 weeks vs 26 weeks GDS509 aging:257	5.52328	1.46334e-09	Lrrc59;Hsp90aa1;Pdha1;Mdh1;Loc100363469;Ndufa4;Pgam1;Cox4i1;Rplp0;Gdi2;Sod2;Rpl9;Paics;Tuba4a;Nme1;Acly;Vcan;Hnrnpf;Rpl35;Flot2;Rpl15;Slc25a5;Ppia;Rpl19
Aging_Perturbations_from_GEO_up	Rat hippocampus 7 months vs 21 months GDS4019 aging:97	5.634	5.18117e-09	Rpl30;Ndrg4;Maob;Slc44a1;Mog;Adpgk;Cox4i1;Rpsa;Ptpn11;Thy1;Ndrg1;Ermn;Gfap;Qdpr;Gprc5b;Sept7;Sh3bgrl3;Mbp;Rpl15;Tppp;Nefh;Bcas1
Aging_Perturbations_from_GEO_up	Rat femur 6 weeks vs 52 weeks GDS509 aging:263	4.92937	2.13646e-08	Hspa9;Lrrc59;Hsp90aa1;Pdha1;Loc100363469;Ndufa4;Pgam1;Gdi2;Rps6;Sod2;Rpl9;Paics;Tuba4a;Nme1;Atic;Hnrnpf;Tmsb4x;Eef1a2;Rpl35;Rpl15;Ppia;Rpl19;Mapk3
Aging_Perturbations_from_GEO_up	Rat femur 7 weeks vs 27 weeks GDS509 aging:258	5.44876	4.01165e-08	Lrrc59;Rpl30;Hsp90aa1;Loc100363469;Rplp0;Rps6;Rpsa;Thy1;Dynll1;Sod2;Tuba4a;Acan;Vcan;Basp1;Rpl27a;Rpl35;Ppia;Dbn1;Rpl19;Plec
Aging_Perturbations_from_GEO_up	Rat diaphysealfemoralcallus 26 weeks vs 52 weeks GDS1995 aging:117	4.20186	2.89517e-07	Arf1;Rps9;Rnh1;Pdha1;Loc100363469;Pgam1;Rplp0;Arpc4;Rpl9;Paics;Ptms;Tjp1;H1f0;Auh;Basp1;Dlg4;Hnrnpf;Tmsb4x;Eef1a2;Flot2;Rpl19;Plec;Mapk3
Aging_Perturbations_from_GEO_up	Rat diaphysealfemoralcallus 6 weeks vs 52 weeks GDS1995 aging:116	4.49056	3.4938e-07	Arf1;Rps9;Rnh1;Pdha1;Mdh1;Mdh2;Rplp0;Tpm1;Rpsa;Arpc4;Rpl9;Paics;Ptms;Tjp1;Atp5b;Auh;Eef1a2;Flot1;Mapt;Pfkm;Plec
Aging_Perturbations_from_GEO_up	Rat diaphysealfemoralcallus 6 weeks vs 26 weeks GDS1995 aging:115	5.20339	3.54215e-07	Rps9;Pdha1;Mdh1;Mdh2;Ndufa4;Rplp0;Tpm1;Rpsa;Arpc4;Rpl9;Atp5b;Auh;Eef1a2;Rpl35;Suclg1;Mapt;Pfkm;Plec
Aging_Perturbations_from_GEO_up	Rat femur 10 weeks vs 56 weeks GDS509 aging:266	4.42756	4.16666e-07	Lrrc59;Arf1;Pgam1;Rplp0;Gdi2;Rpsa;Dynll1;Paics;Mt3;Ptms;Tjp1;Acan;Auh;Rpl27a;Tmsb4x;Eef1a2;Flot1;Rpl35;Slc25a5;Rpl19;Plec
Aging_Perturbations_from_GEO_up	Rat liver 6 months vs 11 months GSE11097 aging:196	4.42023	1.47746e-06	Arf1;Hsp90aa1;Maob;Ndufa4;Pgam1;Rps6;Cisd1;Gstt3;Paics;Tuba4a;Qdpr;Acly;Tmsb4x;Uqcrc1;Ndufs2;Suclg1;Tkt;Hibch;Rpl19
Aging_Perturbations_from_GEO_up	Rat femur 32 weeks vs 58 weeks GDS509 aging:273	3.85346	1.75921e-06	Vps29;Rpl30;Rps9;Gsk3a;Pdha1;Loc100363469;Rplp0;Gdi2;Twf1;Arpc4;Thy1;Rpl9;Paics;Ptms;Dlg4;Rpl27a;Tmsb4x;Flot1;Flot2;Rpl15;Srsf5;Mapk3
Aging_Perturbations_from_GEO_up	Rat extensordigitorumlongusmuscles 6 months vs 30 months GDS1279 aging:70	4.29127	3.96115e-06	Vps29;Rps9;Hsp90aa1;Loc100363469;Rplp0;Tpm1;Rps6;Rpsa;Dynll1;Rpl9;H1f0;Tmsb4x;Eef1a2;Ap2s1;Rpl35;Rpl15;Ppia;Rpl19
Aging_Perturbations_from_GEO_up	Rat thoracicaorta 3 months vs 15 months GDS3077 aging:120	4.07741	4.14068e-06	Trap1;Rps9;Mdh1;Loc100363469;Mdh2;Ndufb5;Ndufa4;Cox4i1;Rplp0;Rpl9;Tjp1;H1f0;Ndufs8;Auh;Tmsb4x;Rpl35;Rpl15;Ppia;Rpl19
Aging_Perturbations_from_GEO_up	Rat femur 8 weeks vs 54 weeks GDS509 aging:265	3.89787	7.29935e-06	Lrrc59;Loc100363469;Pgam1;Rplp0;Gdi2;Rps6;Rpsa;Thy1;Dynll1;Rpl9;Paics;Acan;Auh;Tmsb4x;Rpl35;Rpl15;Ppia;Rpl19;Plec
Aging_Perturbations_from_GEO_up	Rat femur 10 weeks vs 30 weeks GDS509 aging:260	4.7307	1.77314e-05	Loc100363469;Ndufa4;Pgam1;Rplp0;Tpm1;Mt3;Ptms;Acan;Dlg4;Tmsb4x;Eef1a2;Flot1;Rpl35;Slc25a5
Aging_Perturbations_from_GEO_up	Rat hippocampus 7 months vs 21 months GDS4019 aging:98	4.1577	3.49104e-05	Ndrg4;Trio;Anxa3;Thy1;Ndrg1;Gfap;Qdpr;Acly;Gprc5b;Rcn2;Rpl35;Sh3bgrl3;Eif3f;Ppia;Mapk3
Aging_Perturbations_from_GEO_up	Rat posteriorcricoarytenoid 6 months vs 30 months GDS1278 aging:74	4.03682	4.67114e-05	Rps9;Hsp90aa1;Loc100363469;Anxa4;Rplp0;Rps6;Tuba4a;Rpl27a;Tmsb4x;Eef1a2;Rpl35;Suclg1;Slc25a5;Ppia;Rpl19
Aging_Perturbations_from_GEO_up	Rat liver 6 months vs 24 months GSE11097 aging:198	3.74894	5.72285e-05	Rps9;Hsp90aa1;Rnf14;Rplp0;Rps6;Dynll1;Rpl9;Rtn4;Acly;Mthfd1;Rpl27a;Tmsb4x;Rpl15;Slc25a5;Ppia;Rpl19
Aging_Perturbations_from_GEO_up	Rat heart 4 months vs 28 months GDS3102 aging:125	3.95062	5.72285e-05	Rpl30;Rps9;Ndrg4;Hsp90aa1;Rplp0;Rps6;Rpsa;Dynll1;Rpl9;Rpl27a;Tmsb4x;Rpl35;Rpl15;Ppia;Rpl19
Aging_Perturbations_from_GEO_up	Rat thoracicaorta 3 months vs 28 months GDS3077 aging:121	3.66336	0.000122829	Vps29;Rps9;Loc100363469;Rplp0;Rps6;Rpsa;Rpl9;Tjp1;H1f0;Rpl27a;Tmsb4x;Rpl35;Rpl15;Ppia;Rpl19
Aging_Perturbations_from_GEO_up	Rat femur 6 weeks vs 52 weeks GDS509 aging:262	3.60373	0.000141855	Hsp90aa1;Loc100363469;Pgam1;Cox4i1;Arpc4;Tuba4a;Nme1;Auh;Hnrnpf;Flot1;Srsf5;Tkt;Ppia;Pfkm;Mapk3
Aging_Perturbations_from_GEO_up	Rat liver 18 months vs 24 months GSE11097 aging:201	3.59203	0.000145357	Rps9;Hsp90aa1;Mdh1;Rnf14;Ndufb5;Rps6;Rpsa;Tuba4a;Rtn4;Atp5b;Acly;Rpl27a;Rpl35;Rpl15;Rpl19
Aging_Perturbations_from_GEO_up	Rat femur 26 weeks vs 52 weeks GDS509 aging:269	3.55738	0.000159509	Vps29;Rpl30;Arf1;Gdi2;Rps6;Rpsa;Dynll1;Tuba4a;Atic;Tmsb4x;Eef1a2;Rpl15;Tkt;Rpl19;Plec
Aging_Perturbations_from_GEO_up	Rat liver 4 months vs 12 months GSE11097 aging:190	3.64709	0.000209462	Mdh1;Got1;Ndufa4;Rplp0;Adk;Paics;Qdpr;Acly;H1f0;Cxcl12;Tmsb4x;Rpl15;Slc25a5;Ppia
Aging_Perturbations_from_GEO_up	Rat thoracicaorta 6 months vs 28 months GDS3077 aging:123	3.77323	0.000264553	Rps9;Ndrg4;Rplp0;Rpsa;Rpl9;Ptms;H1f0;Tmsb4x;Rpl35;Rpl15;Rpl19;Hspa1a;Mapk3
Aging_Perturbations_from_GEO_up	Rat liver 11 months vs 24 months GSE11097 aging:200	3.4173	0.000366547	Rps9;Rnf14;Rplp0;Rps6;Rpsa;Dynll1;Rpl9;Rtn4;Acly;Rpl27a;Tmsb4x;Rpl15;Slc25a5;Ppia
Aging_Perturbations_from_GEO_up	Rat liver 6 months vs 18 months GSE11097 aging:197	3.4173	0.000366547	Actr2;Maob;Pgam1;Rplp0;Rps6;Gstt3;Dynll1;Rtn4;Mlf2;Cxcl12;Arpc3;Tmsb4x;Ppia;Rpl19
Aging_Perturbations_from_GEO_up	Rat liver 12 months vs 24 months GSE11097 aging:194	3.29685	0.000493016	Rpl30;Rps9;Hsp90aa1;Rplp0;Rps6;Rpsa;Rpl9;Acly;Mthfd1;Rpl27a;Rpl35;Rpl15;Ppia;Rpl19
Aging_Perturbations_from_GEO_up	Rat thoracicaorta 6 months vs 15 months GDS3077 aging:122	3.39763	0.000599478	Trap1;Rps9;Rplp0;Rpl9;Paics;Ptms;H1f0;Auh;Flot1;Rpl35;Flot2;Rpl19;Mapk3
Aging_Perturbations_from_GEO_up	Rat liver 4 months vs 24 months GSE11097 aging:191	3.11681	0.000789729	Rps9;Hsp90aa1;Mdh2;Rplp0;Rps6;Rpl9;Acly;Cxcl12;Rpl27a;Rpl35;Rpl15;Slc25a5;Ppia;Rpl19
Aging_Perturbations_from_GEO_up	Rat femur 8 weeks vs 28 weeks GDS509 aging:259	3.09799	0.000829617	Loc100363469;Ndufa4;Cox4i1;Rplp0;Tpm1;Rpsa;Dynll1;Sod2;Rpl9;Auh;Eef1a2;Rpl35;Pfkm;Rpl19
Aging_Perturbations_from_GEO_up	Rat liver 4 months vs 12 months GSE11097 aging:192	3.1402	0.00109717	Rpl30;Arf1;Rps9;Paics;Acly;Cxcl12;Arpc3;Rpl27a;Tmsb4x;Rpl35;Rpl15;Ppia;Rpl19
Aging_Perturbations_from_GEO_up	Rat thoracicaorta 15 months vs 28 months GDS3077 aging:124	3.22768	0.00137444	Tjp1;Rps9;H1f0;Loc100363469;Rpl27a;Tmsb4x;Rplp0;Rpl35;Rpsa;Rpl15;Ppia;Mapk3
Aging_Perturbations_from_GEO_up	Rat hippocampus 5 months vs 24 months GSE14505 aging:346	2.5056	0.00481325	Maob;Slc44a1;Anxa3;Adpgk;Anxa4;Gstt3;Fah;Ppp1r9a;Ermn;Gfap;Qdpr;Gprc5b;Cdh13;Bcas1
Aging_Perturbations_from_GEO_up	Rat liver 4 months vs 24 months GSE11097 aging:193	2.55265	0.0110632	Acly;Arf1;Cxcl12;Auh;Mdh1;Tmsb4x;Rps6;Rpl35;Slc25a5;Ppia;Rpl19
Aging_Perturbations_from_GEO_up	Rat myocardium 18 weeks vs 22 weeks GDS4025 aging:142	2.81684	0.0123487	Ndrg4;Tmsb4x;Cox4i1;Rplp0;Eef1a2;Rpl35;Arpc4;Srsf5;Plec
Aging_Perturbations_from_GEO_up	Rat liver 12 months vs 24 months GSE11097 aging:195	2.49677	0.0125466	Qdpr;Acly;Maob;Auh;Mdh1;Cox4i1;Rps6;Adk;Fah;Slc25a5;Suox
Aging_Perturbations_from_GEO_up	Rat ventricle 4 months vs 21 months GDS399 aging:112	2.76913	0.0134106	Tjp1;Rps9;Loc100363469;Mdh2;Ndufa4;Rpl27a;Rps6;Srsf5;Rpl9
Aging_Perturbations_from_GEO_up	Rat liver 11 months vs 18 months GSE11097 aging:199	2.39336	0.0299037	Actr2;Rps9;Cxcl12;Maob;Tmsb4x;Rplp0;Rps6;Ppia;Rtn4
Aging_Perturbations_from_GEO_up	Rat extraocularmuscles 6 months vs 30 months GDS1279 aging:72	2.22635	0.0332366	Acly;Lrrc59;Hsp90aa1;Pc;Loc100363469;Ndufa4;Tmsb4x;Tkt;Ppia;Pfkm
Aging_Perturbations_from_GEO_down	Rat thoracicaorta 6 months vs 15 months GDS3077 aging:122	9.15835	1.27385e-16	Vps29;Lrrc59;Rpl30;Arf1;Loc100363469;Cox4i1;Dlst;Acat1;Atp5b;Tmsb4x;Rpl15;Hsp90aa1;Pdha1;Mdh1;Mdh2;Pgam1;Tpm1;Rps6;Rpsa;Dynll1;Sod2;Acly;Pc;Rpl27a;Hnrnpf;Suclg1;Tkt;Slc25a5;Ppia;Pfkp;Gstm5
Aging_Perturbations_from_GEO_down	Rat thoracicaorta 6 months vs 28 months GDS3077 aging:123	7.63882	4.48199e-14	Rpl30;Arf1;Ndufb5;Cox4i1;Dlst;Acat1;Atp5b;Auh;Acads;Hspa9;Hsp90aa1;Pcyt2;Pdha1;Mdh1;Mdh2;Ndufa4;Pgam1;Tpm1;Rps6;Dynll1;Sod2;Acly;Ndufs8;Pc;Hnrnpf;Suclg1;Tkt;Slc25a5;Gstm5
Aging_Perturbations_from_GEO_down	Rat ventricle 4 months vs 21 months GDS399 aging:112	6.81592	1.21591e-12	Arf1;Ndrg4;Ndufb5;Cox4i1;Hpca;Dlst;Ptms;Atp5b;Prkar2a;Tmsb4x;Flot1;Flot2;Acads;Rpl19;Mapk3;Trap1;Mdh1;Pgam1;Tpm1;Rpsa;Sod2;Ndufs8;Dlg4;Eef1a2;Suclg1;Slc25a5;Ppia;Pfkm
Aging_Perturbations_from_GEO_down	Rat thoracicaorta 3 months vs 28 months GDS3077 aging:121	7.72775	1.69093e-12	Lrrc59;Arf1;Ndufb5;Cox4i1;Dlst;Atp5b;Auh;Flot1;Acads;Trap1;Hsp90aa1;Pcyt2;Pdha1;Mdh1;Mdh2;Ndufa4;Pgam1;Dynll1;Acly;Ndufs8;Pc;Suclg1;Tkt;Slc25a5;Hspa1a
Aging_Perturbations_from_GEO_down	Rat hippocampus CA3 18 months vs 28 months GSE21681 aging:356	8.48042	7.84133e-12	Slc24a2;Actr2;Rpl30;Ndrg4;Hsp90aa1;Sec23a;Mdh1;Mog;Rnf14;Pgam1;Rps6;Pgm2l1;Nme1;Rcn2;Oxct1;Atp6v1b2;Nefl;Nefm;Tppp;Slc25a5;Ppia;Chgb
Aging_Perturbations_from_GEO_down	Rat thoracicaorta 15 months vs 28 months GDS3077 aging:124	6.80037	1.85546e-11	Rpl30;Ndufb5;Dlst;Rpl9;Ptms;Atp5b;Auh;Rpl19;Trap1;Hsp90aa1;Pdha1;Mdh1;Mdh2;Ndufa4;Pgam1;Tpm1;Dynll1;Acly;Ndufs8;Pc;Hnrnpf;Suclg1;Tkt;Slc25a5;Hspa1a
Aging_Perturbations_from_GEO_down	Rat frontalcortex 4 months vs 22 months GDS3939 aging:99	6.45762	5.01173e-11	Slc24a2;Ndrg4;Trio;Gspt1;Oxct1;Nefm;Chgb;Actr2;Hsp90aa1;Slc6a17;Got1;Ndufa4;Dynll1;Mt3;Pgm2l1;Tuba4a;Pdp1;Arpc3;Suclg1;Scg3;Nptxr;Slc25a5;Ppia;Sfxn5;Pfkp
Aging_Perturbations_from_GEO_down	Rat heart 4 months vs 28 months GDS3102 aging:125	6.76522	5.03231e-11	Hspa9;Pdha1;Mdh1;Got1;Mdh2;Ndufb5;Ndufa4;Cox4i1;Gdi2;Tpm1;Cisd1;Sod2;Hsd17b10;Acat1;Atp5b;Aldh6a1;Ndufs8;Oxct1;Eef1a2;Uqcrc1;Ndufs2;Suclg1;Acads;Pfkm
Aging_Perturbations_from_GEO_down	Rat hippocampus 7 months vs 21 months GDS4019 aging:97	6.66608	4.02652e-10	Rab2a;Nsf;Slc24a2;Arf1;Slc12a5;Mdh1;Rnf14;Ndufa4;Ap2b1;Dynll1;Tuba4a;Nme1;Atp5b;Gap43;Ndufs8;Oxct1;Flot1;Atp6v1b2;Srsf5;Agrn;Ppia;Pfkp
Aging_Perturbations_from_GEO_down	Rat posteriorcricoarytenoid 6 months vs 30 months GDS1278 aging:74	6.29551	4.20407e-10	Hspa9;Arf1;Pdha1;Mdh1;Got1;Mdh2;Ndufb5;Ndufa4;Cox4i1;Tpm1;Adk;Dlst;Dynll1;Sod2;Rpl9;Acat1;Atp5b;Aldh6a1;Auh;Rpl15;Acads;Pfkm;Hspa1a
Aging_Perturbations_from_GEO_down	Rat hippocampus 7 months vs 21 months GDS4019 aging:98	6.11992	6.20287e-10	Slc24a2;Vps29;Dync1i2;Pdha1;Slc12a5;Got1;Ndufa4;Rps6;Hpca;Rasgrf1;Dynll1;Mt3;Atp5b;Pcp4;Camkv;Arpc2;Arpc3;Tmsb4x;Atp6v1b2;Nefl;Tnik;Srsf5;Chgb
Aging_Perturbations_from_GEO_down	Rat hippocampus CA3 18 months vs 28 months GSE21681 aging:355	6.73923	7.34347e-10	Rps9;Ndrg4;Mdh1;Mog;Rnf14;Pgam1;Rps6;Pgm2l1;Nme1;Atp5b;Gap43;Rcn2;Oxct1;Pithd1;Atp6v1b2;Suclg1;Nefm;Sugt1;Slc25a5;Ppia;Chgb
Aging_Perturbations_from_GEO_down	Rat femur 6 weeks vs 26 weeks GDS509 aging:256	5.23896	9.2113e-10	Lrrc59;Arf1;Rplp0;Rpl9;Atp5b;Tmsb4x;Rpl35;Rpl15;Rpl19;Mapk3;Rps9;Hsp90aa1;Tpm3;Ndufa4;Pgam1;Rps6;Rpsa;Dynll1;Paics;Rpl27a;Hnrnpf;Suclg1;Srsf5;Tkt;Slc25a5;Ppia
Aging_Perturbations_from_GEO_down	Rat hippocampus CA1 18 months vs 28 months GSE21681 aging:353	6.13417	7.62314e-09	Dync1i2;Actr2;Ndrg4;Mdh1;Pgam1;Rps6;Wdr13;Pgm2l1;Tuba4a;Nme1;Pcp4;Gap43;Rcn2;Oxct1;Atp6v1b2;Nefl;Nefm;Tppp;Slc25a5;Chgb
Aging_Perturbations_from_GEO_down	Rat femur 6 weeks vs 52 weeks GDS509 aging:262	6.0605	9.01541e-09	Arf1;Rps9;Mdh1;Mdh2;Ndufa4;Gdi2;Rps6;Thy1;Dynll1;Mt3;Atp5b;Acan;Dlg4;Rpl27a;Eef1a2;Rpl35;Suclg1;Rpl15;Rpl19;Plec
Aging_Perturbations_from_GEO_down	Rat myocardium 18 weeks vs 22 weeks GDS4025 aging:142	5.06872	2.89408e-08	Rgd1304704;Hsp90aa1;Pdha1;Got1;Rps6;Cisd1;Rpl9;Hsd17b10;Acat1;Atp5b;Aldh6a1;Sept7;Auh;Oxct1;Rpl27a;Cops2;Suclg1;Slc25a5;Acads;Ppia;Hibch;Rpl19
Aging_Perturbations_from_GEO_down	Rat femur 26 weeks vs 52 weeks GDS509 aging:269	5.80461	3.60748e-08	Lrrc59;Rps9;Hsp90aa1;Loc100363469;Mdh2;Ndufb5;Cox4i1;Rplp0;Tpm1;Rpl9;Ptms;Acan;Vcan;Auh;Basp1;Hnrnpf;Rpl27a;Slc25a5;Ppia
Aging_Perturbations_from_GEO_down	Rat femur 7 weeks vs 27 weeks GDS509 aging:258	5.48839	3.60748e-08	Arf1;Mdh1;Got1;Mdh2;Ndufa4;Cox4i1;Tpm1;Dlst;Rpl9;Paics;Mt3;Atp5b;Hnrnpf;Tmsb4x;Flot1;Atp6v1b2;Suclg1;Srsf5;Slc25a5;Pfkm
Aging_Perturbations_from_GEO_down	Rat diaphysealfemoralcallus 6 weeks vs 26 weeks GDS1995 aging:115	5.116	1.03287e-07	Hsp90aa1;Loc100363469;Cox4i1;Rps6;Hmgb1;Paics;Mt3;Nme1;Acan;H1f0;Rcn2;Basp1;Rpl27a;Hnrnpf;Tmsb4x;Rpl15;Srsf5;Ppia;Gstm5;Rpl19
Aging_Perturbations_from_GEO_down	Rat extraocularmuscles 6 months vs 30 months GDS1279 aging:72	5.66103	1.14991e-07	Arf1;Rps9;Ndrg4;Pdha1;Mdh1;Mdh2;Ndufb5;Pgam1;Rplp0;Tpm1;Rpl9;Acat1;H1f0;Rpl27a;Eef1a2;Flot1;Rpl19;Hspa1a
Aging_Perturbations_from_GEO_down	Rat hippocampus dentate gyrus 18 months vs 28 months GSE21681 aging:357	5.79118	4.56665e-07	Actr2;Ndrg4;Mdh1;Rnf14;Pgam1;Cox4i1;Rps6;Rpl9;Wdr13;Pgm2l1;Arpc3;Atp6v1b2;Stxbp6;Tppp;Slc25a5;Chgb
Aging_Perturbations_from_GEO_down	Rat thoracicaorta 3 months vs 15 months GDS3077 aging:120	5.7357	4.98472e-07	Lrrc59;Arf1;Hsp90aa1;Pcyt2;Pdha1;Pgam1;Dynll1;Atp5b;Acly;Aldh6a1;Pc;Flot1;Tkt;Slc25a5;Pfkp;Hspa1a
Aging_Perturbations_from_GEO_down	Rat femur 8 weeks vs 54 weeks GDS509 aging:265	5.77082	1.03701e-06	Rpl30;Rps9;Pcyt2;Mdh1;Got1;Ndufb5;Cox4i1;Tpm1;Dlst;Mt3;Tuba4a;Atp5b;H1f0;Ndufs8;Hnrnpf
Aging_Perturbations_from_GEO_down	Rat whiteadipose 4 months vs 28 months GDS3102 aging:126	4.74561	1.09953e-06	Pdha1;Mdh1;Ndufb5;Ndufa4;Pgam1;Cox4i1;Cisd1;Dynll1;Fah;Rtn4;Atp5b;Acly;Pc;Ndufs2;Suclg1;Phgdh;Tkt;Ppia
Aging_Perturbations_from_GEO_down	Rat femur 32 weeks vs 58 weeks GDS509 aging:273	6.95793	2.37606e-06	Atp5b;Hsp90aa1;Mdh1;Cox4i1;Rps6;Rpl35;Rpsa;Ppia;Mt3;Pfkm;Tuba4a;Gstm5
Aging_Perturbations_from_GEO_down	Rat femur 30 weeks vs 56 weeks GDS509 aging:272	6.74729	3.11843e-06	Hsp90aa1;Mdh1;Loc100363469;Ndufa4;Hnrnpf;Cox4i1;Tpm1;Eef1a2;Flot2;Slc25a5;Ppia;Pfkm
Aging_Perturbations_from_GEO_down	Rat hippocampus dentate gyrus 18 months vs 28 months GSE21681 aging:358	4.69798	4.82747e-06	Vps29;Actr2;Ndrg4;Mdh1;Pgam1;Cox4i1;Rps6;Wdr13;Pgm2l1;Nme1;Atp6v1b2;Scg3;Tppp;Sugt1;Slc25a5;Ppia
Aging_Perturbations_from_GEO_down	Rat diaphysealfemoralcallus 26 weeks vs 52 weeks GDS1995 aging:117	6.22837	6.337e-06	Atp5b;Rpl30;Mdh1;Ndufb5;Ndufa4;Rpl27a;Cox4i1;Rps6;Tpm1;Rpsa;Rpl15;Mt3
Aging_Perturbations_from_GEO_down	Rat femur 28 weeks vs 54 weeks GDS509 aging:271	5.17851	6.96982e-06	Rpl30;Mdh1;Got1;Mdh2;Ndufb5;Ndufa4;Cox4i1;Tpm1;Dlst;Sod2;Atp5b;Ndufs8;Eef1a2;Pfkm
Aging_Perturbations_from_GEO_down	Rat femur 10 weeks vs 30 weeks GDS509 aging:260	3.93831	1.09928e-05	Rpl30;Arf1;Rps9;Rps6;Arpc4;Hmgb1;Rpl9;Paics;Tuba4a;Nme1;Atp5b;H1f0;Hnrnpf;Rpl15;Srsf5;Ppia;Pfkm;Rpl19
Aging_Perturbations_from_GEO_down	Rat extensordigitorumlongusmuscles 6 months vs 30 months GDS1279 aging:70	4.53017	1.35681e-05	Pdha1;Mdh1;Got1;Mdh2;Ndufb5;Ndufa4;Cox4i1;Adk;Dlst;Sod2;Atp5b;Ndufs8;Auh;Suclg1;Pfkm
Aging_Perturbations_from_GEO_down	Rat femur 7 weeks vs 53 weeks GDS509 aging:264	4.91242	2.49545e-05	Mdh1;Got1;Mdh2;Ndufa4;Cox4i1;Tpm1;Rpl9;Mt3;Atp5b;Atp6v1b2;Suclg1;Slc25a5;Pfkm
Aging_Perturbations_from_GEO_down	Rat hippocampus CA1 18 months vs 28 months GSE21681 aging:354	4.48534	2.9654e-05	Actr2;Mdh1;Rnf14;Pgam1;Cox4i1;Rps6;Rpl9;Pgm2l1;Napg;Pcp4;Atp6v1b2;Nefm;Tppp;Chgb
Aging_Perturbations_from_GEO_down	Rat femur 8 weeks vs 28 weeks GDS509 aging:259	4.46602	3.06522e-05	Rpl30;Arf1;Rps9;Pdha1;Rps6;Arpc4;Mt3;Tuba4a;H1f0;Hnrnpf;Rpl27a;Tmsb4x;Atp6v1b2;Rpl15
Aging_Perturbations_from_GEO_down	Rat femur 10 weeks vs 56 weeks GDS509 aging:266	4.7902	3.06522e-05	Rps9;Hsp90aa1;Mdh1;Loc100363469;Ndufb5;Cox4i1;Tpm1;Rpl9;Tuba4a;Hnrnpf;Flot2;Ppia;Pfkm
Aging_Perturbations_from_GEO_down	Rat diaphysealfemoralcallus 6 weeks vs 52 weeks GDS1995 aging:116	4.67385	3.70465e-05	Rpl30;Hsp90aa1;Cox4i1;Rps6;Hmgb1;Mt3;Nme1;Hnrnpf;Rpl27a;Tmsb4x;Rpl15;Srsf5;Ppia
Aging_Perturbations_from_GEO_down	Rat femur 6 weeks vs 26 weeks GDS509 aging:257	4.29763	8.38191e-05	Vps29;Rpl30;Got1;Rps6;Tpm1;Rpsa;Arpc4;Thy1;Mt3;Atp5b;Tmsb4x;Eef1a2;Atp6v1b2
Aging_Perturbations_from_GEO_down	Rat liver 11 months vs 18 months GSE11097 aging:199	3.75019	9.41484e-05	Hsp90aa1;Mdh1;Ndufb5;Ndufa4;Cisd1;Adk;Gstt3;Fah;Hsd17b10;Tuba4a;Qdpr;Acly;Uqcrc1;Tkt;Rpl19
Aging_Perturbations_from_GEO_down	Rat femur 26 weeks vs 52 weeks GDS509 aging:268	5.26139	0.000129919	Atp5b;Ndrg4;Got1;Mdh1;Mdh2;Cox4i1;Tpm1;Eef1a2;Dlst;Pfkm
Aging_Perturbations_from_GEO_down	Rat femur 6 weeks vs 52 weeks GDS509 aging:263	4.36142	0.000133751	Atp5b;Rpl30;Rps9;Auh;Basp1;Rplp0;Tpm1;Atp6v1b2;Arpc4;Thy1;Slc25a5;Mt3
Aging_Perturbations_from_GEO_down	Rat femur 12 weeks vs 32 weeks GDS509 aging:261	4.06093	0.000242048	Gsk3a;Ndufa4;Hnrnpf;Rpl27a;Rps6;Tpm1;Flot1;Srsf5;Hmgb1;Rpl9;Paics;Ppia
Aging_Perturbations_from_GEO_down	Rat liver 4 months vs 12 months GSE11097 aging:192	3.64388	0.000345769	Got1;Ndufa4;Pgam1;Cox4i1;Tpm1;Cisd1;Adk;Suox;Hsd17b10;Qdpr;Atp5b;Srsf5;Pfkm
Aging_Perturbations_from_GEO_down	Rat femur 27 weeks vs 53 weeks GDS509 aging:270	3.91554	0.00107415	Rps9;Mdh1;Loc100363469;Ndufa4;Hnrnpf;Cox4i1;Tpm1;Sod2;Mt3;Pfkm
Aging_Perturbations_from_GEO_down	Rat thoracicaorta 3 months vs 6 months GDS3077 aging:119	3.91554	0.00107415	Atp5b;Aldh6a1;Pdha1;Rplp0;Flot1;Dynll1;Paics;Ptms;Rpl19;Hspa1a
Aging_Perturbations_from_GEO_down	Rat hippocampus CA3 region 6 months vs 25 months GSE14724 aging:347	3.33949	0.00200674	Ddx6;Cxcl12;Slc32a1;Uba5;Rasgrf2;Cspg5;Arpc4;Agrn;Hpcal4;Ina;Pafah1b1
Aging_Perturbations_from_GEO_down	Rat femur 12 weeks vs 58 weeks GDS509 aging:267	4.08981	0.00281109	Hsp90aa1;Mdh1;Ndufa4;Cox4i1;Rps6;Tpm1;Rpsa;Ppia
Aging_Perturbations_from_GEO_down	Rat liver 12 months vs 24 months GSE11097 aging:194	2.84705	0.0087637	Qdpr;H1f0;Maob;Mdh1;Got1;Ndufa4;Adk;Gstt3;Fah;Hsd17b10
Aging_Perturbations_from_GEO_down	Rat liver 11 months vs 24 months GSE11097 aging:200	2.72952	0.0109904	Qdpr;Cxcl12;Maob;Ndufa4;Cisd1;Uqcrc1;Gstt3;Fah;Hsd17b10;Ptms
Aging_Perturbations_from_GEO_down	Rat liver 4 months vs 12 months GSE11097 aging:190	2.54758	0.0165291	Atp5b;Rpl30;Hsp90aa1;Mthfd1;Cox4i1;Cisd1;Gstt3;Rpl35;Rpsa;Srsf5
Aging_Perturbations_from_GEO_down	Rat liver 12 months vs 24 months GSE11097 aging:195	2.59325	0.0207881	Rps9;Rpl27a;Rplp0;Gstt3;Rpl35;Dynll1;Rpl9;Ppia;Tuba4a
PPI_Hub_Proteins	YWHAB	13.3437	9.70797e-57	Cntfr;Ncan;Rplp0;Rasgrf1;Ap2a1;Arrb1;Ap2a2;Hapln1;Gphn;Sept8;Rims1;Sept9;Sept6;Sept7;Camkv;Capzb;Opa1;Dpysl5;Basp1;Chchd6;Palm;Flot1;Nefl;Flot2;Nefm;Nsf;Actr2;Tpm3;Sgip1;Prkce;Tpm1;Ank3;Cnksr2;Bcan;Acly;Cacnb3;Vcan;Gap43;Bdh1;Dnajc6;Eef1a2;Uqcrc1;Atp6v1b2;Lancl2;Ndufs2;Suclg1;Acsbg1;Mapt;Tkt;Slc25a5;Mapre2;Ina;Shank3;Dbn1;Plec;Dync1i2;Lrrc59;Stoml2;Sec23a;Ntm;Dlst;Thy1;Kalrn;Napg;Add1;Acat1;Atp5b…
PPI_Hub_Proteins	SLC2A4	8.70183	3.7768e-28	Rpl30;Rnh1;Cox4i1;Rplp0;Rpl9;Ap2a2;Sept9;Sept7;Opa1;Dpysl3;Flot1;Phgdh;Nefh;Acads;Rps13;Mccc2;Rab2a;Nsf;Rgd1304704;Arsa;Rps9;Hsp90aa1;Map1s;Rps6;Rpsa;Dynll1;Acly;Mthfd1;Uqcrc1;Atp6v1b2;Cdh13;Suclg1;Tkt;Slc25a5;Dbn1;Pafah1b1;Plec;Dync1i2;Stoml2;Dlst;Hsd17b10;Rtn4;Acat1;Atp5b;Cand1;Prkar2a;Rpl19;Mapk3;Hspa9;Mdh1;Mdh2;Atad3;Sod2;Paics;Aldh6a1;Rab14;Hnrnpf
PPI_Hub_Proteins	DLG4	9.25637	1.1793e-21	Arf1;Slc1a3;Ap2a1;Kalrn;Napg;Acat1;Atp5b;Basp1;Oxct1;Nefl;Nefm;Mapk3;Nsf;Hspa9;Hsp90aa1;Pdha1;Slc12a5;Mog;Got1;Tpm3;Rpsa;Arpc4;Atp2b2;Dynll1;Fah;Baiap2;Pgm2l1;Tuba4a;Nme1;Cnksr2;Aldh5a1;Dlg4;Uqcrc1;Atp6v1b2;Lancl2;Ndufs2;Tkt;Slc25a5;Ina;Pfkm;Pfkp
PPI_Hub_Proteins	GABARAPL2	6.79411	2.66366e-17	Rpl30;Sec23a;Uba5;Rplp0;Dlst;Rpl9;Hsd17b10;Gspt1;Ipo5;Acat1;Atp5b;Capzb;Tubb1;Phgdh;Rpl15;Rps13;Rpl19;Mccc2;Nsf;Hspa9;Trap1;Cbr1;Rps9;Hsp90aa1;Pdcd6ip;Mdh2;Rps6;Nap1l1;Paics;Lrpprc;Tuba4a;Gfap;Rcn2;Hnrnpf;Eef1a2;Srsf5;Tkt;Slc25a5;Ppia;Pfkp;Hspa1a
PPI_Hub_Proteins	GABARAPL1	6.95073	6.70839e-17	Rpl30;Arf1;Sec23a;Uba5;Rplp0;Rpl9;Hsd17b10;Ipo5;Atp5b;Capzb;Tubb1;Phgdh;Rpl15;Rps13;Rpl19;Nsf;Hspa9;Trap1;Rps9;Hsp90aa1;Pdcd6ip;Mdh2;Ndufa4;Anxa4;Rps6;Nap1l1;Paics;Tuba4a;Nme1;Gfap;Rcn2;Mthfd1;Hnrnpf;Eef1a2;Srsf5;Slc25a5;Ppia;Hspa1a;Plec
PPI_Hub_Proteins	GABARAP	6.13815	1.95488e-13	Rpl30;Sec23a;Uba5;Rplp0;Rpl9;Hsd17b10;Gphn;Ipo5;Atp5b;Tubb1;Rpl15;Rps13;Rpl19;Nsf;Hspa9;Trap1;Rps9;Hsp90aa1;Pdcd6ip;Mdh2;Ndufa4;Rps6;Nap1l1;Tuba4a;Gfap;H1f0;Rcn2;Mthfd1;Hnrnpf;Eef1a2;Srsf5;Slc25a5;Ppia;Hspa1a
PPI_Hub_Proteins	GRIN2B	8.18637	1.37307e-10	Rab2a;Nsf;Mog;Prkce;Arpc4;Ptpn11;Kalrn;Tjp1;Gap43;Arpc2;Capzb;Arpc3;Dlg4;Prkar2a;Nefl;Nefm;Mbp;Slc25a5;Ina;Dbn1;Mapk3
PPI_Hub_Proteins	MAP1LC3A	5.94766	1.39016e-10	Sec23a;Rplp0;Ap2a1;Atp5b;Prkar2a;Tubb1;Phgdh;Rps13;Mccc2;Hspa9;Trap1;Rps9;Hsp90aa1;Pdcd6ip;Map1s;Mdh2;Ndufa4;Nap1l1;Tuba4a;Nme1;Gfap;Mthfd1;Hnrnpf;Eef1a2;Slc25a5;Ppia;Hspa1a
PPI_Hub_Proteins	SNCA	6.43597	1.48102e-10	Cntfr;Ndufb5;Ntm;Slc1a3;Ap2a1;Icam5;Thy1;Nefl;Tppp;Bcas1;Mapk3;Hspa9;Prkce;Ap2b1;Dynll1;Sod2;Tuba4a;Ndufs8;Dlg4;Uqcrc1;Atp6v1b2;Ndufs2;Mapt;Ina;Hspa1a
PPI_Hub_Proteins	ACTB	5.6285	1.01128e-08	Rps9;Hsp90aa1;Tpm3;Prkce;Anxa4;Rplp0;Tpm1;Rpsa;Arpc4;Arrb1;Dynll1;Ppp1r9a;Lrpprc;Tjp1;Nfasc;Arpc2;Capzb;Arpc3;Epb41l2;Tmsb4x;Mapt;Eif3c;Rps13
PPI_Hub_Proteins	MAP1LC3B	5.65307	1.98382e-08	Hspa9;Trap1;Sec23a;Map1s;Uba5;Rplp0;Dynll1;Paics;Hsd17b10;Tuba4a;Ipo5;Gfap;Atp5b;Capzb;Hnrnpf;Tubb1;Eef1a2;Phgdh;Slc25a5;Ppia;Hspa1a;Plec
PPI_Hub_Proteins	MAP3K14	8.09344	3.04163e-08	Hspa9;Rpl30;Rps9;Hsp90aa1;Rps6;Rplp0;Arrb1;Rpl9;Tuba4a;Rpl27a;Rpl35;Hist1h1e;Rpl15;Rps13;Mapk3;Hspa1a
PPI_Hub_Proteins	231403	5.71689	7.74837e-08	Trap1;Cbr1;Actr2;Rps9;Sec23a;Pdcd6ip;Got1;Tpm3;Nap1l1;Sod2;Paics;Gspt1;Lrpprc;Acat1;Mthfd1;Arpc2;Rab14;Suclg1;Tkt;Pfkp
PPI_Hub_Proteins	MAP3K1	7.21964	1.1712e-07	Hspa9;Rpl30;Rps9;Hsp90aa1;Usp9x;Rps6;Arrb1;Tuba4a;Rcn2;Eef1a2;Rpl35;Rac3;Slc25a5;Rps13;Mapk3;Hspa1a
PPI_Hub_Proteins	IKBKE	4.30794	3.84195e-07	Hspa9;Cbr1;Lrrc59;Rps9;Hsp90aa1;Pdcd6ip;Tpm3;Cox4i1;Twf1;Dlst;Nap1l1;Sod2;Gspt1;Lrpprc;Tuba4a;Ktn1;Acly;Atic;Capzb;Rab14;Cops2;Eif3f;Tkt;Hspa1a
PPI_Hub_Proteins	GRB2	3.41661	4.12502e-07	Cntfr;Ddx6;Rpl30;Dlst;Ap2a1;Rims1;Capzb;Ap2s1;Phgdh;Rps13;Hibch;Cbr1;Actr2;Rps9;Pdcd6ip;Tpm1;Arpc4;Ptpn11;Ap2b1;Dynll1;Tuba4a;H1f0;Nfasc;Arpc2;Arpc3;Dlg4;Rpl27a;Hnrnpf;Ppia;Shank3;Dbn1;Plec
PPI_Hub_Proteins	ARRB2	5.04743	4.12502e-07	Rpl30;Rplp0;Rps6;Ap2a1;Arrb1;Nap1l1;Ap2b1;Ap2a2;Tuba4a;Arhgap21;Hnrnpf;Eef1a2;Rpl35;Rpl15;Ppia;Rps13;Dbn1;Rpl19;Hspa1a;Mapk3
PPI_Hub_Proteins	CALM1	4.76119	4.60556e-07	Hsp90aa1;Rogdi;Arrb1;Ap2b1;Paics;Camkk1;Add1;Sept8;Pcp4;Sept6;Gap43;Camkv;Basp1;Dlg4;Epb41l2;Map6;Acsbg1;Mapt;Tnik;Pfkp;Bcas1
PPI_Hub_Proteins	TRAF6	3.84182	7.27722e-07	Lrrc59;Gdi2;Ap2a1;Arrb1;Gspt1;Rtn4;Sept9;Atic;Capzb;Rpl35;Mbp;Hars;Hspa9;Cbr1;Actr2;Rps9;Nap1l1;Paics;Lrpprc;Rcn2;Mthfd1;Arpc2;Eef1a2;Eif3f;Phpt1;Pfkp
PPI_Hub_Proteins	ACTG1	5.63181	8.41147e-07	Tpm3;Prkce;Anxa4;Tpm1;Rpsa;Arpc4;Dynll1;Ppp1r9a;Ndrg1;Tjp1;Arpc2;Capzb;Arpc3;Dlg4;Tmsb4x;Pfkm;Dbn1
PPI_Hub_Proteins	MCC	4.99167	1.83349e-06	Rab2a;Cbr1;Lrrc59;Stoml2;Pdcd6ip;Tpm3;Sod2;Paics;Gspt1;Lrpprc;Acat1;Mthfd1;Capzb;Ap2s1;Eif3f;Tkt;Pfkm;Pfkp
PPI_Hub_Proteins	EIF2C2	6.82097	3.41508e-06	Hspa9;Rps9;Hsp90aa1;Stoml2;Ndufa4;Rps6;Rplp0;Hnrnpf;Rpl27a;Rpl35;Rpl15;Slc25a5;Rps13
PPI_Hub_Proteins	APP	5.23373	4.37291e-06	Nsf;Gsk3a;Hsp90aa1;Pgam1;Atp2b2;Thy1;Hsd17b10;Gfap;Nfasc;Rcn2;Flot1;Nefl;Mbp;Mapt;Agrn;Ppia
PPI_Hub_Proteins	MAPK13	7.06822	6.16146e-06	Cbr1;Mdh2;Pgam1;Gdi2;Hist1h1e;Nefl;Mbp;Phgdh;Nefm;Mapt;Paics;Nefh
PPI_Hub_Proteins	SRRM2	6.3719	6.16146e-06	Dync1i2;Arrb1;Tuba4a;Sept8;Sept9;Sept7;Hnrnpf;Eef1a2;Eif3f;Rps13;Plec;Mapk3;Hspa1a
PPI_Hub_Proteins	EGFR	3.78261	6.40796e-06	Hspa9;Cbr1;Lrrc59;Hsp90aa1;Pdcd6ip;Mdh1;Got1;Usp9x;Tpm1;Ptpn11;Fah;Tuba4a;Tjp1;Atp5b;Snx2;Atic;Hnrnpf;Hist1h1e;Sh3bgrl3;Slc25a5;Hspa1a;Mapk3
PPI_Hub_Proteins	TNIK	7.45856	9.97671e-06	Cnksr2;Lrrc59;Actr2;Cbr1;Mthfd1;Got1;Nefm;Tnik;Hars;Sod2;Acat1
PPI_Hub_Proteins	GRIN1	6.54895	1.12768e-05	Nsf;Tjp1;Gap43;Dlg4;Prkce;Prkar2a;Nefl;Ptpn11;Kalrn;Ina;Mapk3;Hspa1a
PPI_Hub_Proteins	EIF1B	6.10033	2.09969e-05	Actr2;Cbr1;Rps9;Tpm3;Gdi2;Rpl35;Arpc4;Eif3f;Tkt;Sod2;Paics;Acat1
PPI_Hub_Proteins	HNRNPK	5.5646	2.09969e-05	Hspa9;Rpl30;Arf1;Prkce;Rpsa;Arrb1;Hmgb1;Rpl9;Ndrg1;Acat1;Gfap;Atp5b;Mapk3
PPI_Hub_Proteins	CSNK1E	5.34866	3.04907e-05	Hsp90aa1;Ap2a1;Ndrg1;Rtn4;Nme1;Cnksr2;Rims1;Prkar2a;Palm;Nefl;Nefm;Tkt;Ppia
PPI_Hub_Proteins	ARRB1	4.54867	3.58928e-05	Nsf;Hspa9;Hsp90aa1;Ap2a1;Arrb1;Ap2b1;Tuba4a;Ktn1;Atp5b;Eef1a2;Ap2s1;Ppia;Ina;Hspa1a;Mapk3
PPI_Hub_Proteins	EPB41	5.60095	4.31561e-05	Rab2a;Tjp1;Lrrc59;Cbr1;Tpm1;Nefl;Ptpn11;Dynll1;Paics;Ina;Tuba4a;Lrpprc
PPI_Hub_Proteins	YWHAZ	3.33523	5.40972e-05	Hspa9;Trap1;Hsp90aa1;Prkce;Pgam1;Rplp0;Arrb1;Lrpprc;Atp5b;Arhgap21;Cand1;Epb41l2;Hnrnpf;Tubb1;Mapt;Eif3f;Tkt;Ppia;Pfkp;Rpl19;Hspa1a
PPI_Hub_Proteins	ESR1	3.09069	6.57675e-05	Hspa9;Actr2;Rps9;Hsp90aa1;Rnf14;Rplp0;Rps6;Rpsa;Hmgb1;Rpl9;Atp5b;Capzb;Rpl27a;Hnrnpf;Rpl15;Srsf5;Slc25a5;Rps13;Dbn1;Rpl19;Hspa1a;Plec;Mapk3
PPI_Hub_Proteins	CSNK2A2	4.11155	9.92121e-05	Hsp90aa1;Trio;Tpm3;Rplp0;Ppp1r9a;Rtn4;Add1;Gap43;Nfasc;Prkar2a;Nefl;Nefm;Eif3f;Eif3c;Mapk3
PPI_Hub_Proteins	PRKAB1	4.62886	0.000109655	Nsf;Cbr1;Lrrc59;Rps9;Pdha1;Usp5;Gdi2;Cisd1;Gspt1;Camkk1;Rtn4;Acly;Pfkp
PPI_Hub_Proteins	PRKCE	4.94581	0.000120994	Tjp1;Nsf;Atp5b;Capzb;Ndufa4;Prkce;Prkar2a;Tpm1;Mapt;Slc25a5;Hspa1a;Mapk3
PPI_Hub_Proteins	SGK1	5.9397	0.000135781	Ddx6;Gsk3a;Gdi2;Slc1a3;Mapt;Eif3f;Ndrg1;Paics;Camkk1;Gfap
PPI_Hub_Proteins	GC20	5.31559	0.000136492	Actr2;Cbr1;Rps9;Tpm3;Gdi2;Rpl35;Arpc4;Tkt;Sod2;Paics;Acat1
PPI_Hub_Proteins	H2AFX	5.08266	0.000196083	Hspa9;Trap1;Hsp90aa1;Anxa4;Arrb1;Tkt;Sod2;Ppia;Hsd17b10;Hibch;Hspa1a
PPI_Hub_Proteins	PRKACB	5.01978	0.000208065	Nsf;Qdpr;Cnksr2;Prkce;Prkar2a;Nefl;Mbp;Tppp;Mapt;Camkk1;Mapk3
PPI_Hub_Proteins	EIF2C1	5.01978	0.000208065	Lrrc59;Rps9;Hnrnpf;Rpl27a;Rps6;Rplp0;Rpl35;Rpl15;Slc25a5;Rps13;Rpl19
PPI_Hub_Proteins	CDK5	5.45622	0.000237077	Rasgrf2;Dpysl3;Rasgrf1;Nefl;Nefm;Pip5k1c;Tppp;Mapt;Kalrn;Nefh
PPI_Hub_Proteins	SMAD2	3.39368	0.000378613	Rpl30;Usp9x;Nap1l1;Ank3;Rpl9;Tuba4a;Ptms;Gfap;Rims1;Opa1;Nefm;Srsf5;Slc25a5;Chgb;Hspa1a;Mapk3
PPI_Hub_Proteins	IL7R	5.64349	0.000429673	Atp5b;Capzb;Tpm3;Tubb1;Rpsa;Sod2;Tuba4a;Mapk3;Hspa1a
PPI_Hub_Proteins	PRKCA	2.86856	0.000464596	Gsk3a;Hsp90aa1;Prkce;Rps6;Ptpn11;Atp2b2;Icam5;Hmgb1;Add1;Gfap;Tjp1;Gap43;Nfasc;Dlg4;Palm;Mbp;Mapt;Dbn1;Hspa1a;Mapk3
PPI_Hub_Proteins	MAPK14	2.84086	0.00051499	Slc44a1;Prkce;Arrb1;Ppp1r9a;Tjp1;Rims1;Acly;Gap43;Rcn2;Dlg4;Epb41l2;Palm;Nefl;Nefm;Mbp;Srsf5;Tkt;Nefh;Bcas1;Mapk3
PPI_Hub_Proteins	ACTA1	4.78275	0.000598271	Tjp1;Tpm3;Prkce;Epb41l2;Tmsb4x;Anxa4;Rpsa;Arrb1;Dynll1;Coro2b
PPI_Hub_Proteins	HSP90AB1	5.15937	0.000750212	Hsp90aa1;Mthfd1;Mdh1;Tpm3;Dlg4;Rps6;Rplp0;Rpsa;Hspa1a
PPI_Hub_Proteins	PRKACA	3.01856	0.000779156	Gsk3a;Hsp90aa1;Rasgrf1;Ppp1r9a;Ndrg1;Camkk1;Add1;Gfap;Rims1;Acly;Nefl;Nefm;Mbp;Mapt;Tppp;Dbn1;Mapk3
PPI_Hub_Proteins	TNFRSF1A	4.54615	0.00081781	Hspa9;Lrrc59;Trap1;Hsp90aa1;Rcn2;Prkce;Ptpn11;Nap1l1;Slc25a5;Mapk3
PPI_Hub_Proteins	PRKCD	4.54615	0.00081781	Pdp1;Tjp1;Gsk3a;Hsp90aa1;Gap43;Rps6;Mbp;Mapt;Add1;Mapk3
PPI_Hub_Proteins	ESR2	3.24391	0.000834786	Lrrc59;Rps9;Rplp0;Rps6;Ap2a1;Gspt1;Gfap;Arpc2;Eef1a2;Srsf5;Nefh;Rps13;Dbn1;Hspa1a;Mapk3
PPI_Hub_Proteins	CDK2	2.54993	0.000918452	Usp5;Map1s;Ap2a1;Paics;Add1;Mlf2;Cnksr2;Rims1;Acly;Atic;Aldh5a1;Mthfd1;Dpysl3;Palm;Hist1h1e;Mbp;Mapt;Tppp;Tkt;Eif3c;Nefh;Mapk3
PPI_Hub_Proteins	RPS6KA3	3.11551	0.00120144	Slc24a2;Gsk3a;Map1s;Rps6;Gphn;Add1;Acly;Dlg4;Epb41l2;Prkar2a;Mbp;Mapt;Pfkm;Bcas1;Mapk3
PPI_Hub_Proteins	DYNLL1	4.28118	0.00120144	Dync1i2;Mdh1;Dlg4;Mdh2;Prkar2a;Dynll1;Pfkm;Gphn;Pfkp;Bcas1
PPI_Hub_Proteins	CDK1	2.48335	0.00165686	Map1s;Anxa4;Gdi2;Hmgb1;Paics;Add1;Nme1;Gfap;Tjp1;Acly;Epb41l2;Palm;Hist1h1e;Phgdh;Mbp;Pip5k1c;Mapt;Nefh;Ppia;Dbn1;Plec
PPI_Hub_Proteins	CHUK	4.49266	0.00167504	Hspa9;Hsp90aa1;Trio;Tpm3;Eef1a2;Arrb1;Ptpn11;Tuba4a;Hspa1a
PPI_Hub_Proteins	TUBB	5.04055	0.00168741	Tjp1;Map6;Dlst;Arrb1;Mapt;Dynll1;Chgb;Arl8b
PPI_Hub_Proteins	BTK	4.91378	0.0019478	Atp5b;Prkce;Eef1a2;Twf1;Pip5k1c;Tuba4a;Dbn1;Pfkp
PPI_Hub_Proteins	ARF6	4.3163	0.00209925	Acly;Mthfd1;Gdi2;Arrb1;Pip5k1c;Sod2;Gspt1;Lrpprc;Pfkp
PPI_Hub_Proteins	SQSTM1	4.26052	0.00225798	Dlg4;Ndufs2;Mbp;Nefm;Mapt;Tkt;Ina;Plec;Mapk3
PPI_Hub_Proteins	NR3C1	3.71688	0.00305934	Hsp90aa1;Aldh5a1;Rnf14;Epb41l2;Srsf5;Hmgb1;Ptms;Ktn1;Hspa1a;Mapk3
PPI_Hub_Proteins	RHOA	4.49865	0.00316432	Arhgap21;Trio;Prkce;Rasgrf1;Rac3;Pip5k1c;Ktn1;Hspa1a
PPI_Hub_Proteins	YWHAE	3.60698	0.00368891	Atp5b;Hsp90aa1;Stoml2;Rcn2;Dlg4;Rplp0;Eef1a2;Rasgrf1;Arrb1;Tkt
PPI_Hub_Proteins	FYN	2.67518	0.00451478	Cntfr;Hsp90aa1;Prkce;Ptpn11;Thy1;Dynll1;Tuba4a;Rtn4;Rims1;Nfasc;Dlg4;Flot1;Flot2;Mapt;Shank3
PPI_Hub_Proteins	MAP3K3	3.40543	0.00540583	Hspa9;Hsp90aa1;Capzb;Eef1a2;Phgdh;Sugt1;Slc25a5;Dbn1;Tuba4a;Hspa1a
PPI_Hub_Proteins	TNFRSF1B	4.39396	0.00717461	Hspa9;Rcn2;Eef1a2;Slc1a3;Phgdh;Slc25a5;Pfkp
PPI_Hub_Proteins	CAMK2A	3.87297	0.00728297	Qdpr;Rims1;Pdcd6ip;Dlg4;Rasgrf1;Nefl;Mapt;Gfap
PPI_Hub_Proteins	VIM	3.49204	0.00752863	Tjp1;Sh3gl3;Prkce;Nefl;Arrb1;Mapt;Dynll1;Gfap;Plec
PPI_Hub_Proteins	CDH1	4.28346	0.00788469	Tjp1;Hsp90aa1;Arpc2;Usp9x;Pip5k1c;Ndrg1;Hspa1a
PPI_Hub_Proteins	DNM1	4.21281	0.00850063	Sh3gl3;Capzb;Dlg4;Prkce;Pacsin2;Arrb1;Ap2a2
PPI_Hub_Proteins	COPS5	4.11107	0.00955223	Stoml2;Basp1;Epb41l2;Cops2;Flot1;Dynll1;Hspa1a
PPI_Hub_Proteins	YWHAG	2.51178	0.0100067	Hspa9;Gsk3a;Arrb1;Baiap2;Ndrg1;Camkk1;Tuba4a;Atp5b;Rabep1;Dlg4;Epb41l2;Nefl;Phgdh;Hspa1a
PPI_Hub_Proteins	PRKDC	2.85306	0.0107959	Rims1;Hsp90aa1;Gap43;Dlg4;Rps6;Mbp;Mapt;Hmgb1;Eif3c;Ina;Gfap
PPI_Hub_Proteins	AKT1	2.58825	0.0148685	Acly;Gsk3a;Hsp90aa1;Map1s;Prkce;Rps6;Them4;Arrb1;Mapt;Camkk1;Ktn1;Mapk3
PPI_Hub_Proteins	MYC	2.30737	0.0148685	Arf1;Gsk3a;Hsp90aa1;Rnh1;Usp9x;Ap2a1;Nap1l1;Lrpprc;Tuba4a;Opa1;Hnrnpf;Ap2s1;Ndufs2;Suclg1;Mapk3
PPI_Hub_Proteins	VHL	2.68109	0.0162265	Rab2a;Acly;Lrrc59;Rps9;Atic;Rab14;Gdi2;Rpl35;Tkt;Sod2;Gspt1
PPI_Hub_Proteins	HSP90AA1	2.98378	0.0180199	Tjp1;Hsp90aa1;Dlg4;Rps6;Arrb1;Sugt1;Ndrg1;Hspa1a;Mapk3
PPI_Hub_Proteins	PRKCZ	3.44466	0.0218827	Gsk3a;Hsp90aa1;Prkar2a;Mbp;Mapt;Add1;Mapk3
PPI_Hub_Proteins	MDM2	3.10888	0.0220956	Hsp90aa1;Rcn2;Rpl27a;Rasgrf1;Nefm;Arrb1;Nap1l1;Baiap2
PPI_Hub_Proteins	IRS1	3.42152	0.0220978	H1f0;Cand1;Prkce;Rplp0;Flot2;Ptpn11;Mapk3
PPI_Hub_Proteins	CLTC	3.85153	0.0226905	Dlg4;Dnajc6;Arrb1;Ap2b1;Ndrg1;Ap2a2
PPI_Hub_Proteins	IKBKG	2.5284	0.0227064	Hspa9;Atp5b;Sept9;H1f0;Hsp90aa1;Rplp0;Eef1a2;Slc25a5;Dbn1;Lrpprc;Hspa1a
PPI_Hub_Proteins	SUMO2	3.31031	0.0251915	Hspa9;Uba5;Hnrnpf;Kalrn;Pfkm;Ipo5;Hspa1a
PPI_Hub_Proteins	RAC1	2.75745	0.0266804	Trio;Dlg4;Epb41l2;Rasgrf1;Baiap2;Kalrn;Tuba4a;Nme1;Ktn1
PPI_Hub_Proteins	GSK3B	1.97539	0.0266976	Map1s;Prkce;Rtn4;Gphn;Add1;Tjp1;Rims1;Acly;Prkar2a;Hnrnpf;Dpysl3;Palm;Nefm;Mbp;Mapt;Tppp;Nefh;Mapk3
PPI_Hub_Proteins	MAPK8	2.37765	0.032879	Map1s;Prkce;Hnrnpf;Cops2;Rac3;Nefm;Mapt;Tppp;Rtn4;Hspa1a;Mapk3
PPI_Hub_Proteins	MAPK1	2.2473	0.0358384	Hsp90aa1;Dlg4;Prkce;Nefl;Nefm;Mbp;Arrb1;Mapt;Tnik;Tppp;Nefh;Mapk3
PPI_Hub_Proteins	YWHAH	3.01591	0.0377148	Rims1;Rabep1;Epb41l2;Rasgrf1;Arrb1;Baiap2;Camkk1
PPI_Hub_Proteins	SRC	2.07475	0.0384424	Hsp90aa1;Pdcd6ip;Prkce;Rasgrf1;Arrb1;Ptpn11;Ap2b1;Napg;Rtn4;Gfap;Dlg4;Pip5k1c;Mapt;Shank3
PPI_Hub_Proteins	MAPK10	2.92899	0.0425107	Rac3;Arrb1;Nap1l1;Rtn4;Add1;Gfap;Hspa1a
PPI_Hub_Proteins	HSPA8	2.9122	0.0432368	Hsp90aa1;Dlg4;Pacsin2;Arrb1;Mapt;Dynll1;Hspa1a
PPI_Hub_Proteins	MAPK3	2.32667	0.0477684	Hsp90aa1;Dlg4;Prkce;Mbp;Arrb1;Ptpn11;Pip5k1c;Mapt;Pfkm;Mapk3

## Sheet: sheet_10
pathway	description	enrichment_ratio	fdr	features
GO:0043209	myelin sheath	9.68189	7.41845e-05	Ckb;Rala;Gnb1;Pebp1;Slc25a5;Glul;Ehd1;Gnb2;Dld;Vdac1
GO:0043177	organic acid binding	8.06824	7.41845e-05	Ddah2;Hapln4;Grin2a;Acan;Bcan;Aars;Hapln1;Alb;Vcan;Glul;Got1
rno04720	Long-term potentiation	12.8358	0.000481776	Mapk3;Camk2g;Grin2a;Grm5;Ppp3r1;Prkca;Calm2
rno00330	Arginine and proline metabolism	13.9643	0.00109147	Aldh7a1;Ckb;Aldh18a1;Gamt;Got1;Lap3
rno04014	Ras signaling pathway	5.59353	0.00109147	Rasal1;Kit;Mapk3;Grin2a;Rala;Gnb1;Rab5b;Prkca;Calm2;Ntrk2;Gnb2
rno04724	Glutamatergic synapse	8.34646	0.00109147	Mapk3;Grin2a;Grm5;Ppp3r1;Gnb1;Glul;Prkca;Gnb2
GO:0044282	small molecule catabolic process	5.15992	0.00171758	Atp2b4;Ddah2;Aldh1l1;Pcca;Oxct1;Glud1;Hagh;Sord;Got1;Cbs;Hadhb
GO:0010038	response to metal ion	4.15121	0.00200493	Rasal1;Kit;Mapk3;Grin2a;Glud1;Tf;Anxa11;Cat;Pebp1;Sord;Park7;Alb;Got1
GO:0006520	cellular amino acid metabolic process	5.45151	0.00200493	Atp2b4;Ddah2;Pcca;Glud1;Iars;Aars;Park7;Glul;Got1;Cbs
rno05031	Amphetamine addiction	11.0021	0.00200493	Pdyn;Camk2g;Grin2a;Ppp3r1;Prkca;Calm2
rno04713	Circadian entrainment	8.55723	0.00200493	Mapk3;Camk2g;Grin2a;Gnb1;Prkca;Calm2;Gnb2
rno04020	Calcium signaling pathway	5.7327	0.00280479	Atp2b4;Camk2g;Grin2a;Grm5;Ppp3r1;Slc25a5;Prkca;Calm2;Vdac1
GO:0005759	mitochondrial matrix	5.06375	0.00280479	Pcca;Oxct1;Glud1;Ak4;Hagh;Slc25a5;Coq5;Tst;Dld;Hadhb
GO:0098589	membrane region	4.48236	0.00309082	Mapk3;Cdh13;Gja1;L1cam;Flot2;Capn2;Slc25a5;Park7;Add3;Vdac1;Snap25
GO:0031225	anchored component of membrane	7.63212	0.00309082	Ntm;Flot2;Dlg2;Bcan;Rab5b;Cntfr;Snap25
GO:0030165	PDZ domain binding	8.25161	0.00687404	Atp2b4;Gja1;L1cam;Grm5;Dlg2;Ctbp1
rno00280	Valine, leucine and isoleucine degradation	10.8057	0.00712776	Pcca;Oxct1;Aldh7a1;Dld;Hadhb
rno00630	Glyoxylate and dicarboxylate metabolism	16.1365	0.00715742	Pcca;Cat;Glul;Dld
rno00020	Citrate cycle (TCA cycle)	14.6695	0.00993256	Ogdhl;Pck2;Acly;Dld

[truncated: 13 more sheets: sheet_11, sheet_12, sheet_13, sheet_14, sheet_15, sheet_16, sheet_17, sheet_18, sheet_19, sheet_20, sheet_21, sheet_22, sheet_23]
