# Supplementary material for: Rasal1: A candidate exercise mimetic to increase adult hippocampal neurogenesis in middle age
Source: Research Square preprint supplement (doi:10.21203/rs.3.rs-8394751/v1), 2026-02-13
Supplement: Supplementary file 6 [file cb9c8edc30b84abbfd94ae57.xlsx]

## Sheet: cohorts and readouts
cohort	group						exercise duration (weeks)	brain collection	readouts	figure	supplementary material
	Y-SED	Y-EX	MA-SED	MA-EX	LVSCR	LVshRASAL1
Discovery	10	10	10	10	/	/	7	fresh (dorsal and ventral sections of bilateral dentate gyri)	Physiological measurements, proteomics (dentate gyrus, serum), Metabolomics (serum), Western Blot for Rasal1 (dorsal dentate gyrus), in vitro (serum treatment)	1A-D, 2B,C,E, 3A-D, 5G-M	S1A, S1C-H
Discovery.2	10	10	9	10	/	/	6	PFA-perfused	AHN IHC (middle-aged groups), Rasal1 colocalization IHC (young adult sedentary group)	1E (MA); 2F
Validation	10	10	20	/	/	/	8	right hemisphere fresh (whole dentate gyrus) and left hemisphere PFA post-fixed	Proteomics (whole dentate gyrus), AHN IHC (young aduts groups)	1E (Y)	S1B, S1E-G
Independent	12	12	/	/	/	/	7.5	fresh (dorsal hippocampus)	qPCR for Rasal1 (dorsal hippocampus)	2D
Surgery	/	/	/	/	10	12	/	PFA-perfused	AHN IHC and morphometric analysis, GFP IHC	4A-B, D-F	S4
Surgery.2	/	/	/	/	11	13	/	fresh	Viral vector qPCR, Rasal1 qpCR	4A,C	S4
